# Supplementary material for: Recent, full-length gene retrocopies are common in canids
Source: HighWire-hosted journal article supplement (doi:10.1101/gr.276828.122), 2022-08-01
Supplement: Supplemental_Table_S2.xlsx [file Supplemental_Table_S2.xlsx]

## Sheet: S2
Supplemental Table S2: Non-reference retroCNV
Parent_gene	Parent_gene_location	Gene_biotype	RetroCNV	RetroCNV_location	Total_Canids_with_retroCNV	TSD_length	TSD_sequence	RetroCNV_specific_SNV	Insertion_site_analysis	Insertion_site_gene	RetrogeneDB_copies_all_species	RetrogeneDB_copies_CanFam3
AAGAB	30:31369534-31422363	Protein_coding	AAGABL1	16:20795596-20795614	5	18	TAAGAAAATGAGCATACC	0	intron_variant	ESYT2	4	1
AASDHPPT	5:26172888-26193639	Protein_coding	AASDHPPTL1	25:27079415-27079432	5	17	CCATTATGAAACTTTTC	0	intron_variant	PINX1	9	0
ABCD3	6:54740704-54816854	Protein_coding	ABCD3L1	7:54660394-54660410	44	16	AAAAAGCTTTTCTTTT	1	intron_variant,non_coding_transcript_variant	LOC111096772	2	0
ABCF2	16:15253110-15267221	Protein_coding	ABCF2L1	27:6320625-6320641	3	16	TCCATATGCTGTTTTA	0	intergenic_variant	-	9	1
ABCG2	32:11443778-11517674	Protein_coding	ABCG2L1	19:4477904-4477915	3	11	CAAAACAAACT	na	intergenic_variant	-	3	0
ABHD12	23:1496183-1562682	Protein_coding	ABHD12L1	11:64791859-64791877	20	18	GCTCCCACAGCTTTTATT	0	upstream_gene_variant	-	1	0
ABHD17A	20:57083381-57092021	Protein_coding	ABHD17AL1	23:6064812-6064815	18	3	AGA	0	intergenic_variant	-	2	0
ABHD18	19:12935971-12982227	Protein_coding	ABHD18L1	33:4390136-4390151	2	15	CCCTACAAATTATTT	na	intron_variant	EPHA6	0	0
ABRACL	1:31254959-31267167	Protein_coding	ABRACLL1	31:13882751-13882765	3	14	AAAGAAGTTATTGA	na	intron_variant	-	0	0
ACBD5	2:6873207-6922110	Protein_coding	ACBD5L1	25:42401888-42401934	1	46	AAACATCATCCTATTCTTGGATTGGATGGTCTTTGGTAAGGATGGC	0	intron_variant,non_coding_transcript_variant	-	1	0
ACOT13	35:22707214-22723345	Protein_coding	ACOT13L1	25:15141998-15142011	19	13	TCTAAATGTTTTA	6	intergenic_variant	-	1	0
ACSL1	16:45735675-45806235	Protein_coding	ACSL1L1	18:41406405-41406417	5	12	AAACATGCTGTG	8	downstream_gene_variant	-	1	0
ACTB	6:12421006-12424449	Protein_coding	ACTBL1	2:39229620-39229638	4	18	CTCATCCTTTTGATTTTT	0	intergenic_variant	-	119	3
ACTB	6:12421006-12424449	Protein_coding	ACTBL2	5:73527066-73527110	2	44	CCCGGACCAACCTCGGCTTTAGAGGCTCTCCCAGAACCAACCAG	0	intron_variant	NUDT7	119	3
ACTB	6:12421006-12424449	Protein_coding	ACTBL3	8:28786548-28786564	7	16	TAAAAATTTTAAATAG	0	intron_variant	TXNDC16	119	3
ACTB	6:12421006-12424449	Protein_coding	ACTBL4	12:20828913-20828923	1	10	CAGCATCTTC	0	downstream_gene_variant	-	119	3
ACTG1	9:635978-638328	Protein_coding	ACTG1L1	1:115217252-115217265	1	13	AAAAATATATTTA	na	intron_variant	ZNF383	136	0
ACTG1	9:635978-638328	Protein_coding	ACTG1L2	13:59838264-59838280	18	16	TAAGAAATCACCTAGC	0	intergenic_variant	-	136	0
ACTR2	10:64696068-64733027	Protein_coding	ACTR2L1	13:15409290-15409307	17	17	ATAACAACTTCTTTCTT	0	intergenic_variant	-	9	0
ACTR2	10:64696068-64733027	Protein_coding	ACTR2L2	15:16394253-16394270	1	17	TAAAACTGAAACTCTTT	0	intron_variant	ST3GAL3	9	0
ACTR3	19:35097968-35133330	Protein_coding	ACTR3L1	3:4673677-4673692	1	15	CAAAATACAAACAGT	0	intergenic_variant	-	35	0
ADA	24:32083786-32119810	Protein_coding	ADAL1	24:35306452-35306469	7	17	TGAATCAGTATAGTTTA	0	intergenic_variant	-	10	1
ADAD1	19:17728106-17826412	Protein_coding	ADAD1L1	8:46883481-46883496	2	15	AGAAGGTAAAATACA	1	intron_variant	ACOT6	1	0
ADH4	32:21282526-21299387	Protein_coding	ADH4L1	25:15591791-15591806	3	15	TGAAAAATAATGGAG	0	intergenic_variant	-	0	0
ADK	4:24540626-25046469	Protein_coding	ADKL1	1:47668298-47668317	169	19	AAAAATAAAAAAAATTCTA	4	intron_variant	SERAC1	1	0
ADSS	7:35440250-35477470	Protein_coding	ADSSL1	23:21009198-21009215	5	17	GTCCTCTAAGATTTTTC	na	intron_variant,non_coding_transcript_variant	-	10	1
AIDA	38:16938279-16971200	Protein_coding	AIDAL1	1:104471368-104471385	0	17	AAAGAAATGAATAAATA	na	intron_variant	LOC102151412	34	0
AIFM2	4:21086778-21096789	Protein_coding	AIFM2L1	4:7777896-7777909	3	13	CTAATGGTTTTTA	2	intron_variant	DISC1	0	0
AK6	2:54390411-54406872	Protein_coding	AK6L1	7:67041683-67041696	2	13	AAAGTTATTAAGG	0	intron_variant	USP14	4	0
AK6	2:54390411-54406872	Protein_coding	AK6L2	11:43945179-43945195	7	16	TACCTTGGGAATTTTT	0	intergenic_variant	-	4	0
AK6	2:54390411-54406872	Protein_coding	AK6L3	18:24116926-24116940	2	14	AAAACATCCATTCT	na	intergenic_variant	-	4	0
AK6	2:54390411-54406872	Protein_coding	AK6L4	27:27542961-27542980	2	19	CAACATTTCTGGATCTTTT	na	intergenic_variant	-	4	0
AK6	2:54390411-54406872	Protein_coding	AK6L5	28:22867147-22867162	1	15	GTTATATGTCTTTTT	0	intron_variant,non_coding_transcript_variant	-	4	0
AK6	2:54390411-54406872	Protein_coding	AK6L6	30:6907209-6907225	2	16	CATTAAAAGCATTTTT	na	intron_variant	FSIP1	4	0
AK6	2:54390411-54406872	Protein_coding	AK6L7	36:19200959-19201020	27	na		0	intron_variant,non_coding_transcript_variant	LOC111094254	4	0
ALDH18A1	28:9101578-9148063	Protein_coding	ALDH18A1L1	8:21084358-21084375	18	17	AAAAGCATGCTAAGTGA	0	intergenic_variant	-	0	0
ALDH7A1	11:15828581-15878556	Protein_coding	ALDH7A1L1	28:16283962-16283977	2	15	TAAATTACTACAAGA	0	upstream_gene_variant	SLK	4	0
ALDOA	6:18077241-18083053	Protein_coding	ALDOAL1	22:5795541-5795557	1	16	AAGAATAAATAAATTA	0	intron_variant	GTF2F2	22	2
ALDOA	6:18077241-18083053	Protein_coding	ALDOAL2	27:16807428-16807450	1	22	TGCTTCCATTTCTTTGTCTATA	0	intergenic_variant	-	22	2
ALKBH7	20:53783948-53785563	Protein_coding	ALKBH7L1	11:37810208-37810224	4	16	AAGAAACTAGGAAAAA	0	intergenic_variant	-	0	0
ALYREF	9:398207-402787	Protein_coding	ALYREFL1	24:28054629-28054645	1	16	TGGGAGAAGCATTTCC	0	intergenic_variant	-	4	1
AMD1	12:67432871-67453791	Protein_coding	AMD1L1	3:10442938-10442953	8	15	CTTCTCAGTCTTTTA	0	intergenic_variant	-	72	2
AMD1	12:67432871-67453791	Protein_coding	AMD1L2	4:51355081-51355097	1	16	CTTCAGAATGGATCCT	na	intron_variant	RNF145	72	2
AMD1	12:67432871-67453791	Protein_coding	AMD1L3	23:34029067-34029080	1	13	TAAAAGTAGCAAC	0	intergenic_variant	-	72	2
AMD1	12:67432871-67453791	Protein_coding	AMD1L4	24:41147679-41147694	3	15	CATTTTACCCCTTTC	0	intergenic_variant	-	72	2
AMT	20:39815449-39820528	Protein_coding	AMTL1	21:30106761-30107585	270	na		na	downstream_gene_variant	LOC611042	16	1
AMZ2	9:14996647-15005546	Protein_coding	AMZ2L1	25:25079486-25079500	2	14	TTGGCAATAGTTTC	0	intergenic_variant	-	11	0
ANAPC15	21:25971680-25975556	Protein_coding	ANAPC15L1	28:10588240-10588255	13	15	TCCTCCTACATTACT	0	intron_variant	-	13	1
ANAPC16	4:22860893-22889249	Protein_coding	ANAPC16L1	1:114091957-114091970	23	13	TTTCTGTGTGTTC	0	intron_variant,non_coding_transcript_variant	LOC102152935	3	0
ANAPC16	4:22860893-22889249	Protein_coding	ANAPC16L2	16:24137388-24137388	1	na		0	intergenic_variant	-	3	0
ANXA2	30:25176845-25210244	Protein_coding	ANXA2L1	9:9057861-9057875	3	14	GCTAACATTTTTCT	na	intron_variant	EFCAB13	32	3
ANXA7	4:23933959-23961968	Protein_coding	ANXA7L1	34:26944003-26944016	3	13	CTAAATAACTTTT	na	intron_variant	PPM1L	6	1
AP1AR	32:32083077-32123857	Protein_coding	AP1ARL1	11:40556081-40556096	1	15	AATTTTCCCTTTTTT	na	intron_variant	FOCAD	2	0
AP1G2	8:3785085-3793081	Protein_coding	AP1G2L1	2:81976906-81976926	1	20	TTTAAAGCATGCACCTTCAG	1	upstream_gene_variant	AGMAT	0	0
AP1S2	X:12075797-12105911	Protein_coding	AP1S2L1	1:16696389-16696404	16	15	TGAAATTAGTTTCTG	0	intron_variant	CCBE1	25	0
AP1S2	X:12075797-12105911	Protein_coding	AP1S2L2	22:6250755-6250800	1	45	AATGATGCTGTATAATGAGCCAACTGTGTATCTTAGCTATGATAT	0	intergenic_variant	-	25	0
AP2B1	9:37946761-38078074	Protein_coding	AP2B1L1	2:74242423-74242439	3	16	TTACAAAGTAATTTTA	0	intron_variant	MAN1C1	14	0
AP2B1	9:37946761-38078074	Protein_coding	AP2B1L2	4:80628505-80628519	1	14	TCTCTGATTATTTT	0	intergenic_variant	-	14	0
AP2B1	9:37946761-38078074	Protein_coding	AP2B1L3	8:59522427-59522447	3	20	TTCGCCGTTGCCATTTTTTT	0	intron_variant	KCNK10	14	0
AP2B1	9:37946761-38078074	Protein_coding	AP2B1L4	21:9856032-9856108	1	na		na	intron_variant,non_coding_transcript_variant	LOC106560174	14	0
AP2M1	34:17071199-17080445	Protein_coding	AP2M1L1	1:96951535-96951549	2	14	CTGCAATGACATTT	0	intergenic_variant	-	14	2
AP2M1	34:17071199-17080445	Protein_coding	AP2M1L2	5:21849451-21849467	1	16	TCTGTGAAATACTTTA	0	intergenic_variant	-	14	2
AP4S1	8:10342988-10397171	Protein_coding	AP4S1L1	28:8500983-8501000	1	17	CAAAAAATGAGCAAAAG	0	intron_variant	NOC3L	19	0
APEX1	15:17786808-17789422	Protein_coding	APEX1L1	17:26699988-26699988	69	na		0	intron_variant,non_coding_transcript_variant	LOC111090425	7	0
APEX1	15:17786808-17789422	Protein_coding	APEX1L2	20:50235839-50235853	2	14	CCAAGCAACTTTTA	0	intron_variant	SMARCA4	7	0
APEX1	15:17786808-17789422	Protein_coding	APEX1L3	37:9988205-9988221	7	16	AAAAACAGGACAACAG	1	intron_variant	AOX2P	7	0
ARF1	14:835476-836424	Protein_coding	ARF1L1	1:88248180-88248196	8	16	AAAGCAGAAAAAGGGA	0	intron_variant	TJP2	83	1
ARF1	14:835476-836424	Protein_coding	ARF1L2	5:44197230-44197238	4	8	AGATTTCT	0	intron_variant	PDE4B	83	1
ARF3	27:5610078-5626635	Protein_coding	ARF3L1	25:17577138-17577152	15	14	GTCAAATAAAGTTT	0	intron_variant	CRYL1	25	0
ARHGAP5	8:11190663-11269353	Protein_coding	ARHGAP5L1	5:18750413-18750430	9	17	AACAATAATTATCTTTA	0	intergenic_variant	-	0	0
ARHGEF9	X:49101034-49312796	Protein_coding	ARHGEF9L1	7:38550044-38550058	1	14	CTTCAGTTGATTTT	1	intergenic_variant	-	0	0
ARL14EP	18:36961451-36980631	Protein_coding	ARL14EPL1	37:4573243-4573256	1	13	GAAACCCTGTTTT	0	intergenic_variant	-	12	0
ARL2	18:52169225-52174561	Protein_coding	ARL2L1	15:26771558-26771574	4	16	TGTAAGACAGTATTCT	0	intron_variant	LRRIQ1	92	1
ARL2	18:52169225-52174561	Protein_coding	ARL2L2	16:46867832-46867848	7	16	GGGACTGAACAATTTT	0	intron_variant,non_coding_transcript_variant	LOC111090347	92	1
ARL2	18:52169225-52174561	Protein_coding	ARL2L3	29:29130696-29130712	3	16	TCCCTAAGGACTTTCT	0	intron_variant,non_coding_transcript_variant	-	92	1
ARL2BP	2:59127139-59133993	Protein_coding	ARL2BPL1	5:24694092-24694107	6	15	TCCCCAGTTTCTTTA	0	intron_variant,non_coding_transcript_variant	LOC111095858	90	3
ARL8B	20:12479680-12525330	Protein_coding	ARL8BL1	16:33751060-33751086	2	26	TTTTGTTTTTGTTGTTTTTAGGTTTT	0	intron_variant	GTF2E2	16	0
ARMC10	18:16994583-17020417	Protein_coding	ARMC10L1	3:20272242-20272242	1	na		0	intron_variant,non_coding_transcript_variant	-	14	1
ARMCX2	X:75517183-75521486	Protein_coding	ARMCX2L1	5:43413150-43413160	4	10	AAGAATTTTG	0	upstream_gene_variant	C5H1orf141	0	0
ARMCX2	X:75517183-75521486	Protein_coding	ARMCX2L2	19:32312214-32312230	1	16	AAAACATGAAAGCAAG	0	intergenic_variant	-	0	0
ARMT1	1:41799853-41814684	Protein_coding	ARMT1L1	20:12680966-12680982	6	16	TATCTCAAATATTATT	0	downstream_gene_variant	LOC102151882	0	0
ARPC1A	6:10212203-10245112	Protein_coding	ARPC1AL1	24:25075559-25075574	2	15	AGAAATATTTTCCCC	0	intron_variant	AAR2	64	0
ARPC1B	6:10192299-10198383	Protein_coding	ARPC1BL1	14:34916675-34916690	6	15	AAAATGTCAATATTA	0	intron_variant,non_coding_transcript_variant	-	18	1
ARPC5	7:16976392-16986015	Protein_coding	ARPC5L1	22:14330970-14330986	2	16	TCAAAACCTTAGTGTA	0	intron_variant,non_coding_transcript_variant	-	16	0
ARPC5L	9:58142001-58149285	Protein_coding	ARPC5LL1	9:56075459-56075473	3	14	AACAGGCACATTTA	na	intron_variant	GARNL3	16	0
ARPC5L	9:58142001-58149285	Protein_coding	ARPC5LL2	24:19655325-19655339	2	14	GAGCCATGGTTTTC	0	intron_variant,non_coding_transcript_variant	LOC106557688	16	0
ARPC5L	9:58142001-58149285	Protein_coding	ARPC5LL3	25:12219994-12220069	3	na		na	intron_variant	GTF3A	16	0
ARPIN	3:52870775-52880742	Protein_coding	ARPINL1	19:41550395-41550830	1	na		0	intron_variant,non_coding_transcript_variant	LOC102154919	1	0
ARPP19	30:18190358-18213054	Protein_coding	ARPP19L1	7:49240189-49240199	1	10	TTGGTTTGTT	0	intergenic_variant	-	47	2
ASF1A	1:58821324-58834935	Protein_coding	ASF1AL1	5:6439269-6439287	2	18	CCCTAATGTAGTTTTCTT	0	intergenic_variant	-	6	0
ASF1A	1:58821324-58834935	Protein_coding	ASF1AL2	6:51413411-51413426	1	15	AATATTCAACAATGA	0	intergenic_variant	-	6	0
ATF1	27:3904635-3992949	Protein_coding	ATF1L1	5:47984508-47984523	2	15	TCTCAACAGCATTTA	0	intron_variant	PATJ	17	0
ATF2	36:19032376-19103147	Protein_coding	ATF2L1	12:46025815-46025914	1	na		na	intergenic_variant	-	2	0
ATF4	10:25528880-25531018	Protein_coding	ATF4L1	10:46881231-46881265	1	34	AGAGAGAGAGAACATGAGTGGGAGGGGCAAGAGG	3	intron_variant	CAMKMT	0	0
ATF6B	12:1515186-1525165	Protein_coding	ATF6BL1	23:25945135-25945240	1	na		0	intron_variant	PLCL2	0	0
ATG4C	5:47273387-47358760	Protein_coding	ATG4CL1	13:62048244-62048260	10	16	TGTTTTTTCTTTCGGC	1	intron_variant,non_coding_transcript_variant	-	2	0
ATG5	12:63565859-63692383	Protein_coding	ATG5L1	15:29474680-29474694	1	14	CCAATATCCTTTTC	na	intergenic_variant	-	5	0
ATIC	37:22420645-22446769	Protein_coding	ATICL1	30:35371075-35371138	2	na		0	upstream_gene_variant	NR2E3	10	0
ATMIN	5:70779676-70795829	Protein_coding	ATMINL1	3:20554858-20554873	1	15	TAAAACAACCTTACC	0	intron_variant,non_coding_transcript_variant	LOC111095147	2	0
ATMIN	5:70779676-70795829	Protein_coding	ATMINL2	5:25275158-25275355	1	na		0	intergenic_variant	-	2	0
ATOX1	4:57599927-57608891	Protein_coding	ATOX1L1	9:25099300-25099317	3	17	AAAAGAAAAGAAAAGTG	na	intergenic_variant	-	0	0
ATP1B3	23:37684507-37727535	Protein_coding	ATP1B3L1	16:56792052-56792069	1	17	TCATTCAACAAATTTCT	na	intergenic_variant	-	31	0
ATP5MC1	9:25123194-25125959	Protein_coding	ATP5MCL1	21:32057066-32057116	1	na		0	intron_variant	TRIM66	93	5
ATP5PO	31:28472106-28481759	Protein_coding	ATP5POL1	10:26210863-26211604	4	na		na	intron_variant	FAM227A	15	0
ATP5PO	31:28472106-28481759	Protein_coding	ATP5POL2	22:18581920-18581935	2	15	AGAAATAAGAGGAAG	na	intergenic_variant	-	15	0
ATP6AP2	X:35050588-35073633	Protein_coding	ATP6AP2L1	32:23908686-23908722	1	36	GTTTCTCAGTGTTCACTTCCTGATTGAAGTGACTAA	0	intergenic_variant	-	7	0
ATP6V0C	6:38519869-38525217	Protein_coding	ATP6V0CL1	14:41371333-41371348	8	15	TCTGGGATAATTTTT	0	intergenic_variant	-	21	0
ATP6V1B2	25:36833246-36858846	Protein_coding	ATP6V1B2L1	20:50315-50330	1	15	CTTTTAAAATCTATT	0	intron_variant	ZNF197	8	0
ATP6V1D	8:41332581-41354058	Protein_coding	ATP6V1DL1	3:74239924-74239935	1	11	AAGAAAAAGAA	0	intron_variant	TBC1D1	13	0
ATP6V1D	8:41332581-41354058	Protein_coding	ATP6V1DL2	5:63007824-63007839	1	15	GAATGGTCAATTCTT	0	intron_variant	CLSTN1	13	0
ATP6V1D	8:41332581-41354058	Protein_coding	ATP6V1DL3	30:18596557-18596573	1	16	TGATGTACCTTCTTTT	0	intergenic_variant	-	13	0
ATP6V1D	8:41332581-41354058	Protein_coding	ATP6V1DL4	38:3593063-3593082	75	19	TTTGTACACTGAAAATTAT	1	intergenic_variant	-	13	0
ATP6V1E1	27:45222647-45249317	Protein_coding	ATP6V1E1L1	5:1488026-1488039	3	13	GGGCAATGCTTTG	na	intergenic_variant	-	57	1
ATP6V1F	14:7786841-7789584	Protein_coding	ATP6V1FL1	7:54082720-54082737	2	17	AAGAAAGAGCAGAAGAG	0	downstream_gene_variant	SLC39A6	0	0
ATP6V1F	14:7786841-7789584	Protein_coding	ATP6V1FL2	21:32809475-32809492	3	17	CACCAAAAGACAACATT	0	intron_variant	ZNF143	0	0
ATP9B	1:1136862-1374102	Protein_coding	ATP9BL1	8:18441536-18441556	3	20	TTAGAGAATTTAAGCTCCTA	0	intergenic_variant	-	0	0
ATXN10	10:20277339-20440747	Protein_coding	ATXN10L1	8:35710540-35710565	4	25	TTTGAGTGCATTTGGTGAAATATTG	0	intergenic_variant	-	1	0
ATXN3	8:1318440-1354709	Protein_coding	ATXN3L1	2:57789934-57789954	0	20	GTAGAGGAATTATTTAACTT	na	intergenic_variant	-	14	0
ATXN3	8:1318440-1354709	Protein_coding	ATXN3L2	11:33818434-33818439	2	5	TTATT	0	intron_variant	MPDZ	14	0
AUNIP	2:74097435-74116824	Protein_coding	AUNIPL1	3:59142806-59142823	82	17	AGGGATCTTTTATTTTC	0	intergenic_variant	-	0	0
AURKA	24:41585483-41604875	Protein_coding	AURKAL1	8:28106642-28106703	1	na		na	intron_variant	GNG2	30	3
AURKA	24:41585483-41604875	Protein_coding	AURKAL2	31:8423162-8423179	31	17	TATTGCAGTGCATTTAT	0	intron_variant	ROBO1	30	3
AURKB	5:33014098-33028951	Protein_coding	AURKBL1	21:30814012-30814025	1	13	TTGCTTTGGTTTT	na	intron_variant	NLRP14	6	0
AURKB	5:33014098-33028951	Protein_coding	AURKBL2	32:21028089-21028105	59	16	AAGAAAAAGAAAAACA	2	intergenic_variant	-	6	0
BABAM1	20:45466808-45474953	Protein_coding	BABAM1L1	16:44277498-44277530	1	32	CCCATTAGCAACTTCTATTTCTGGTGCATGAT	0	intron_variant	-	1	0
BACH1	31:24269310-24310369	Protein_coding	BACH1L1	5:87384405-87384419	7	14	AAATGAACTGAACA	0	intergenic_variant	-	0	0
BAIAP2	9:923519-992254	Protein_coding	BAIAP2L1	5:28961404-28961418	4	14	GGACCAGGCTTGTA	0	downstream_gene_variant	MMP3	0	0
BARD1	37:21946770-22024672	Protein_coding	BARD1L1	11:21614333-21614483	1	na		na	intron_variant	FSTL4	1	1
BARD1	37:21946770-22024672	Protein_coding	BARD1L2	23:8633548-8633563	2	15	GAAGACAAGGTTTTA	na	intron_variant	SCN11A	1	1
BARD1	37:21946770-22024672	Protein_coding	BARD1L3	33:19973616-19973632	1	16	GCTTTTTCCACTTTGG	na	intron_variant	LSAMP	1	1
BCAP29	18:12969594-13021948	Protein_coding	BCAP29L1	22:35378765-35378781	1	16	TTTGAGCCTTTCTATA	0	intergenic_variant	-	3	0
BCL10	6:62712937-62723852	Protein_coding	BCL10L1	5:80845564-80845578	4	14	AAGATTTTGAAATT	0	intergenic_variant	-	2	0
BCL2L12	1:106865346-106873329	Protein_coding	BCL2L12L1	11:23711032-23711047	1	15	TATTCAACATTTCTT	0	intron_variant,non_coding_transcript_variant	LOC102152433	3	0
BECN1	9:20204203-20214809	Protein_coding	BECN1L1	37:6766932-6766945	7	13	TCTACCAGATTTT	0	upstream_gene_variant	LOC111094396	20	0
BHLHB9	X:76635887-76651465	Protein_coding	BHLHB9L1	11:49510900-49510916	3	16	TAAAAAAACCACAGTA	na	intron_variant,non_coding_transcript_variant	-	0	0
BLOC1S5	35:7860336-7998461	Protein_coding	BLOC1S5L1	23:27162327-27162346	48	19	TAAAAATATTTAGGTTAGG	1	intron_variant	EAF1	8	0
BLOC1S5	35:7860336-7998461	Protein_coding	BLOC1S5L2	29:28383667-28383683	2	16	AAAAAATTTAATGAGG	0	intron_variant,non_coding_transcript_variant	-	8	0
BMI1	2:10818232-10827825	Protein_coding	BMI1L1	3:77919273-77919288	3	15	TAAAAGAATCATCCA	0	intergenic_variant	-	6	0
BMI1	2:10818232-10827825	Protein_coding	BMI1L2	X:47108297-47108313	2	16	AAAAAGGTGGGTATAG	0	intergenic_variant	-	6	0
BNIP3	28:40037681-40050499	Protein_coding	BNIP3L1	2:18462473-18462489	1	16	TGACTTTAATATTTGT	0	intron_variant	ARL5B	146	0
BNIP3L	25:31133512-31149750	Protein_coding	BNIP3LL1	16:11328354-11328367	1	13	AAAAAGCTTTTTA	0	intron_variant	PTN	35	0
BOD1	4:38888096-38895539	Protein_coding	BOD1L1	3:3460201-3460219	34	18	ATAAAAAAGATAAAAGTG	0	intron_variant,non_coding_transcript_variant	-	12	1
BOD1	4:38888096-38895539	Protein_coding	BOD1L2	5:56873136-56873190	1	na		0	intron_variant	GNB1	12	1
BOLA3	17:48941730-48952327	Protein_coding	BOLA3L1	13:52139262-52139276	23	14	CAGTTTTTCTTTTT	0	intron_variant,non_coding_transcript_variant	LOC111098628	31	1
BRCC3	X:123081262-123143509	Protein_coding	BRCC3L1	6:25882787-25882802	1	15	CAACTCTGTATTTTT	na	intron_variant	TMC7	10	0
BRCC3	X:123081262-123143509	Protein_coding	BRCC3L2	13:26699992-26700006	1	14	AAGACTCCATTCAG	0	intergenic_variant	-	10	0
BRCC3	X:123081262-123143509	Protein_coding	BRCC3L3	20:18968618-18968632	6	14	TCACAAAACATTTT	0	downstream_gene_variant	LOC111091422	10	0
BRK1	20:8220109-8231337	Protein_coding	BRK1L1	5:45227392-45227406	2	14	GAAAACAATTTTCA	na	intergenic_variant	-	1	0
BRK1	20:8220109-8231337	Protein_coding	BRK1L2	6:56030329-56030345	1	16	CATAGAAGTACTTTTT	na	intergenic_variant	-	1	0
BRK1	20:8220109-8231337	Protein_coding	BRK1L3	8:23010693-23010708	1	15	AGCACGCAAGTCTTT	na	intergenic_variant	-	1	0
BRK1	20:8220109-8231337	Protein_coding	BRK1L4	8:35429616-35429631	9	15	TCCCCTGTGGTTCTT	0	intergenic_variant	-	1	0
BRK1	20:8220109-8231337	Protein_coding	BRK1L5	9:47360960-47360974	5	14	TTAAATGTGTTTTC	0	3_prime_UTR_variant	ASPA	1	0
BRK1	20:8220109-8231337	Protein_coding	BRK1L6	21:22878140-22879262	19	na		0	intergenic_variant	-	1	0
BRK1	20:8220109-8231337	Protein_coding	BRK1L7	27:3846311-3846327	2	16	TATTTTTTAAACTTTA	0	upstream_gene_variant	HIGD1C	1	0
BRK1	20:8220109-8231337	Protein_coding	BRK1L8	38:17840681-17840695	2	14	GAAACTGTGGATGA	na	downstream_gene_variant	LOC102152982	1	0
BRK1	20:8220109-8231337	Protein_coding	BRK1L9	X:54952519-54952536	22	17	ATCAAGAGGGATTGTTT	0	intergenic_variant	-	1	0
BTF3L4	15:9239933-9262103	Protein_coding	BTF3L4L1	12:937468-937480	3	12	TAAGATTCTTTT	0	intron_variant	DLA88	105	2
BTRC	28:13988408-14173223	Protein_coding	BTRCL1	27:34392994-34393086	0	na		na	intron_variant	ETV6	3	0
BTRC	28:13988408-14173223	Protein_coding	BTRCL2	28:32464514-32464533	3	19	CAAGAAAATCAAATACTTC	na	intron_variant	CUZD1	3	0
BUB1	17:35208989-35252296	Protein_coding	BUB1L1	27:13273237-13273279	1	42	CCACATTCTCTTAATTTTGTCTATACTTTCTTTGATGAATTA	na	intergenic_variant	-	0	0
C12H6orf203	12:64278569-64293999	Protein_coding	C12H6orf203L1	19:16597653-16597669	3	16	TTAAAACAAACATCTT	0	intergenic_variant	-	1	0
C15H1orf50	15:595391-603176	Protein_coding	C15H1orf50L1	15:5868849-5868913	1	na		0	intron_variant	OSCP1	na	0
C17H2orf68	17:39472158-39477774	Protein_coding	C17H2orf68L1	27:31514205-31514222	1	17	TCAATATACTCAGTTTT	2	5_prime_UTR_variant	RERG	0	0
C18H11orf98	18:53992413-53995549	Protein_coding	C18H11orf98L1	24:19079722-19079734	3	12	TTTTTTTTTTTT	na	intergenic_variant	-	na	0
C21H11orf58	21:39397196-39410143	Protein_coding	C21H11orf58L1	3:32924011-32924028	1	17	CCCGAATAGAAAATCTT	na	intergenic_variant	-	na	0
C21H11orf58	21:39397196-39410143	Protein_coding	C21H11orf58L2	15:29034956-29034968	3	12	GAAATGATTTCT	na	intron_variant,non_coding_transcript_variant	LOC111098894	na	0
C23H3orf33	23:49485250-49504244	Protein_coding	C23H3orf33L1	20:49732097-49732114	1	17	CCTCCCCCCACTATTGT	0	intron_variant	LOC611075	na	0
C25H2orf72	25:42982661-42994551	Protein_coding	C25H2orf72L1	19:19424690-19424709	3	19	CATTTTATAACGAGCATTT	0	intergenic_variant	-	na	0
C25H4orf27	25:20622781-20645459	Protein_coding	C25H4orf27L1	36:10253852-10253864	1	12	CCATGCAGCATA	0	intergenic_variant	-	0	0
C26H12orf43	26:16826481-16835832	Protein_coding	C26H12orf43L1	5:12733041-12733055	1	14	AGTTTGTATTTTCT	na	upstream_gene_variant	-	na	0
C27H12orf4	27:40341944-40388424	Protein_coding	C27H12orf4L1	14:13801729-13801745	1	16	ACAAAATGGATAATTG	0	intron_variant	ABCB1	na	0
C27H12orf57	27:38101705-38103553	Protein_coding	C27H12orf57L1	32:1299310-1299326	6	16	TAAGAACTAAATTAGT	1	intron_variant	SHROOM3	na	0
C35H6orf62	35:22725186-22741526	Protein_coding	C35H6orf62L1	21:8919625-8919725	1	na		0	intergenic_variant	-	na	0
C37H2orf69	37:9092569-9106741	Protein_coding	C37H2orf69L1	16:3125494-3125510	9	16	TCCATAGGAAGAACTT	2	intron_variant	CNTNAP2	na	0
C3H15orf40	3:54788092-54793197	Protein_coding	C3H15orf40L1	1:66026123-66026137	2	14	TAAAAAAATAAAAT	0	intron_variant	ECHDC1	na	0
C4BPA	7:6239036-6268934	Protein_coding	C4BPAL1	19:32420033-32420041	1	8	CCATTTTT	na	intergenic_variant	-	1	1
C7H18orf21	7:54202934-54210601	Protein_coding	C7H18orf21L1	32:3355088-3355104	81	16	CAAAAATAGACACAGA	0	intergenic_variant	-	na	0
C7H1orf21	7:17710731-17851232	Protein_coding	C7H1orf21L1	25:571033-571050	1	17	AAAAAAAATGAAGTGTA	0	intergenic_variant	-	na	0
C8H14orf2	8:71600422-71605615	Protein_coding	C8H14orf2L1	7:54767804-54767824	1	20	CTTTACTATCTACTTCCTTT	0	intergenic_variant	-	0	0
C8H14orf2	8:71600422-71605615	Protein_coding	C8H14orf2L2	17:903293-903307	2	14	CCTCCCGTACTTTT	0	intergenic_variant	-	0	0
C9H9orf16	9:55319943-55323429	Protein_coding	C9H9orf16L1	14:37913600-37913607	9	7	AGGAATT	na	intron_variant,non_coding_transcript_variant	-	na	0
C9H9orf16	9:55319943-55323429	Protein_coding	C9H9orf16L2	17:21903829-21903851	211	22	TTAGGTATCTGAGAGAGAGAGA	na	intron_variant	RBKS	na	0
C9H9orf78	9:54009543-54016154	Protein_coding	C9H9orf78L1	7:50859008-50859026	32	18	ATTAAAAGAAACAGTTTA	0	intergenic_variant	-	na	1
CAB39	25:42752798-42801257	Protein_coding	CAB39L1	3:73256422-73256437	1	15	AAAAAGTGACCATAG	0	intron_variant,non_coding_transcript_variant	LOC111095295	6	0
CACUL1	28:29007685-29093032	Protein_coding	CACUL1L1	8:11968656-11968725	1	na		1	intron_variant	-	1	0
CACYBP	7:24372599-24384084	Protein_coding	CACYBPL1	8:55204409-55204424	2	15	AGAACCCAGCAAACC	0	intergenic_variant	-	61	1
CAP1	15:2886661-2913975	Protein_coding	CAP1L1	2:49980685-49980705	4	20	ATAAATAAAATCTTAAAAAA	na	intergenic_variant	-	26	2
CAPNS1	1:116549608-116558928	Protein_coding	CAPNS1L1	1:100498103-100498120	3	17	TTATTCTAACAGGTTTT	0	intron_variant	LOC102155171	43	1
CAPNS1	1:116549608-116558928	Protein_coding	CAPNS1L2	12:64430290-64430565	2	na		0	intron_variant	PDSS2	43	1
CAPNS1	1:116549608-116558928	Protein_coding	CAPNS1L3	17:32438491-32438506	1	15	AAAATAAATAAATAA	0	intergenic_variant	-	43	1
CAPNS1	1:116549608-116558928	Protein_coding	CAPNS1L4	28:322523-323214	1	na		0	upstream_gene_variant	MAPK8	43	1
CAPRIN1	18:33695371-33733688	Protein_coding	CAPRIN1L1	8:74277836-74277845	1	9	ATATCTTCT	1	intergenic_variant	-	5	0
CAPRIN1	18:33695371-33733688	Protein_coding	CAPRIN1L2	14:19438426-19438593	1	na		0	intergenic_variant	-	5	0
CAPZA1	17:62900062-62948164	Protein_coding	CAPZA1L1	4:82604652-82604668	3	16	AAAAAGTGGTCTGTTT	na	intron_variant	CDH12	45	0
CARD19	1:98582373-98595098	Protein_coding	CARD19L1	35:12535114-12535127	1	13	TCTACTTAAAAAA	0	intron_variant	PHACTR1	0	0
CARS2	22:58891826-58946112	Protein_coding	CARS2L1	10:64805957-64805973	1	16	AAGAATTACCAATTCA	0	intron_variant	SPRED2	0	0
CASP3	16:45920074-45940507	Protein_coding	CASP3L1	9:45132177-45132194	1	17	AGAAACCCCTTCTCCTG	0	intron_variant	VPS53	16	0
CBX1	9:24363566-24369060	Protein_coding	CBX1L1	11:45224673-45224689	22	16	TTAATGCAACATTTTA	0	intron_variant	IFT74	145	1
CBX1	9:24363566-24369060	Protein_coding	CBX1L2	15:38851242-38851258	2	16	CTTATACATAATATCT	na	intron_variant	ANKS1B	96	1
CBX1	9:24363566-24369060	Protein_coding	CBX1L3	17:40289643-40289724	7	na		na	intron_variant	DNAH6	96	1
CBX3	14:39510694-39520796	Protein_coding	CBX3L1	2:43353900-43353918	2	18	AGAAATTAAAGGTATCGA	na	intron_variant	ANKRD55	145	11
CBX3	14:39510694-39520796	Protein_coding	CBX3L2	5:75529650-75529667	1	17	AAATCCTGGTGGCAGGG	0	intergenic_variant	-	145	11
CBX3	14:39510694-39520796	Protein_coding	CBX3L3	17:34674936-34674953	87	17	ATAAAACCCCTCTCTTG	0	intron_variant	KCNIP3	145	11
CBX3	14:39510694-39520796	Protein_coding	CBX3L4	20:47425072-47425088	1	16	CAGGTGTACACATTTT	na	intron_variant	LOC106560121	145	11
CBX3	14:39510694-39520796	Protein_coding	CBX3L5	22:6686187-6686207	2	20	CTCAGCTTGTATCCATTTTA	0	intron_variant,non_coding_transcript_variant	-	145	11
CCDC113	2:58332444-58361265	Protein_coding	CCDC113L1	8:19753001-19758109	4	na		0	intron_variant,non_coding_transcript_variant	-	1	0
CCNA2	19:18317866-18324592	Protein_coding	CCNA2L1	32:35206480-35206497	4	17	CTAAATTTAAACAATCC	0	intron_variant,non_coding_transcript_variant	LOC111093695	2	0
CCND2	27:40563306-40593362	Protein_coding	CCND2L1	13:25003999-25004011	2	12	AACCCATTGTGA	0	intergenic_variant	-	2	0
CCNG1	4:47800697-47808259	Protein_coding	CCNG1L1	2:12108420-12108436	6	16	CGAAGAGGACATTTTG	0	intron_variant	NEBL	18	1
CCNG1	4:47800697-47808259	Protein_coding	CCNG1L2	13:28246118-28246128	19	10	TAAAACTCTT	2	intergenic_variant	-	18	1
CCNG1	4:47800697-47808259	Protein_coding	CCNG1L3	21:19306561-19306577	1	16	TAAATAAAAAAGGTCA	0	intron_variant	TENM4	18	1
CCNG1	4:47800697-47808259	Protein_coding	CCNG1L4	21:42353890-42354133	1	na		0	intergenic_variant	-	18	1
CCNG1	4:47800697-47808259	Protein_coding	CCNG1L5	22:46225203-46225214	1	11	CAAGTATTTGT	na	3_prime_UTR_variant	CLDN10	18	1
CCNG1	4:47800697-47808259	Protein_coding	CCNG1L6	27:8885297-8885312	3	15	GCATGTCTAGTCTTT	0	3_prime_UTR_variant	ANO6	18	1
CCNI	32:1612590-1650661	Protein_coding	CCNIL1	1:37988615-37988632	3	17	AAATATACTGTGAAATA	0	intron_variant,non_coding_transcript_variant	-	13	0
CCNI	32:1612590-1650661	Protein_coding	CCNIL2	2:56075875-56075892	1	17	AACATTAGGCACAAAGG	0	intron_variant,non_coding_transcript_variant	LOC111092570	13	0
CCNI	32:1612590-1650661	Protein_coding	CCNIL3	14:39770835-39770851	5	16	CCGAGATTGGGTTTTC	0	intron_variant,non_coding_transcript_variant	LOC106559666	13	0
CCNI	32:1612590-1650661	Protein_coding	CCNIL4	15:17622856-17622977	1	na		0	upstream_gene_variant	OR11H4	13	0
CCNI	32:1612590-1650661	Protein_coding	CCNIL5	28:19897384-19897399	1	15	CTTCTCCTTATTCTT	0	intergenic_variant	-	13	0
CCNJ	28:9491683-9511585	Protein_coding	CCNJL1	12:50367510-50367525	1	15	CTGTTTTGGACTTCT	1	intergenic_variant	-	7	0
CCNK	8:67910772-67927216	Protein_coding	CCNKL1	9:38582458-38582690	1	na		0	intron_variant,non_coding_transcript_variant	LOC111097425	0	0
CCNY	2:1387962-1720497	Protein_coding	CCNYL1	24:25669053-25669071	1	18	CAAAATAAGGTGGTAGCC	0	intron_variant	SAMHD1	9	0
CCT2	10:11560287-11586559	Protein_coding	CCT2L1	2:10396126-10396139	1	13	CAAACCAACTCTT	0	upstream_gene_variant	U6	7	2
CCT2	10:11560287-11586559	Protein_coding	CCT2L10	12:69517200-69517219	1	19	ATCTTGGGAGAATTTCTTT	na	intergenic_variant	-	7	2
CCT2	10:11560287-11586559	Protein_coding	CCT2L11	19:39135994-39136009	2	15	AGAAAGCAGGTTCAG	0	intron_variant,non_coding_transcript_variant	-	7	2
CCT2	10:11560287-11586559	Protein_coding	CCT2L12	28:14262537-14262553	5	16	AAGACTTTGGATATTA	0	intron_variant	FBXW4	7	2
CCT2	10:11560287-11586559	Protein_coding	CCT2L13	28:19337664-19337680	1	16	AACATCCATCACTTCG	0	intron_variant,non_coding_transcript_variant	-	7	2
CCT2	10:11560287-11586559	Protein_coding	CCT2L14	X:3323818-3323832	1	14	GGAGCTATATTCTC	0	upstream_gene_variant	-	7	2
CCT2	10:11560287-11586559	Protein_coding	CCT2L2	2:13896412-13896426	1	14	CTCATAAACTTAAT	0	intron_variant	MALRD1	7	2
CCT2	10:11560287-11586559	Protein_coding	CCT2L3	2:18152113-18152275	8	na		na	frameshift_variant	-	7	2
CCT2	10:11560287-11586559	Protein_coding	CCT2L4	5:33405025-33405041	4	16	CTATTTATTTCTTTTT	0	intergenic_variant	-	7	2
CCT2	10:11560287-11586559	Protein_coding	CCT2L5	5:52788135-52788150	3	15	AAAATAAAACAAGAA	na	intron_variant	FYB2	7	2
CCT2	10:11560287-11586559	Protein_coding	CCT2L6	5:70931924-70931940	1	16	ACATCATTTCCTTTTA	0	downstream_gene_variant	LOC111096024	7	2
CCT2	10:11560287-11586559	Protein_coding	CCT2L7	7:3163741-3163756	3	15	AACTTATTAATTTTT	na	intron_variant,non_coding_transcript_variant	-	7	2
CCT2	10:11560287-11586559	Protein_coding	CCT2L8	7:61958712-61958729	3	17	AAGAAATCCTGCTACCT	na	intron_variant,non_coding_transcript_variant	-	7	2
CCT2	10:11560287-11586559	Protein_coding	CCT2L9	10:46861839-46861854	2	15	TATATTTTCCTTTTT	na	intron_variant	CAMKMT	7	2
CCT4	10:61859148-61874030	Protein_coding	CCT4L1	29:4837292-4837308	1	16	CTGATATCAACTTTTC	0	intergenic_variant	-	8	2
CCT4	10:61859148-61874030	Protein_coding	CCT4L2	30:24787730-24787742	1	12	GATGATGTTGTT	na	intergenic_variant	-	8	2
CCT5	34:4035851-4049131	Protein_coding	CCT5L1	27:44359994-44360010	1	16	GAAAATTAAAGGTGTG	0	intron_variant	CACNA1C	12	0
CCT5	34:4035851-4049131	Protein_coding	CCT5L2	37:16190140-16190152	1	12	TAAACATTGTAA	0	intron_variant	PLEKHM3	12	0
CCT6A	6:546278-556996	Protein_coding	CCT6AL1	7:25611399-25611429	1	30	GTTGGGGCAATAGACTCAACCTCTCAATGG	0	intron_variant	SLC9C2	20	1
CCT6A	6:546278-556996	Protein_coding	CCT6AL2	13:42778358-42778373	1	15	ATAATTCTTTTGACA	0	intron_variant	COX7B2	20	1
CCT7	17:49614876-49632777	Protein_coding	CCT7L1	30:13197924-13197938	1	14	AAAGGAAACCTAAG	0	intergenic_variant	-	17	1
CCT8	31:24061185-24075002	Protein_coding	CCT8L1	35:10826152-10826160	2	8	CACAGCCT	0	intergenic_variant	-	3	0
CD164	12:66295444-66309055	Protein_coding	CD164L1	36:17366992-17367116	1	na		na	intron_variant	MAP3K20	11	0
CDADC1	22:2443459-2489147	Protein_coding	CDADC1L1	5:73518536-73518550	1	14	GAAAGTCAGAAAGA	na	intron_variant	NUDT7	0	0
CDADC1	22:2443459-2489147	Protein_coding	CDADC1L2	16:30109631-30109644	1	13	TCCCTCAGCTTTT	0	intergenic_variant	-	0	0
CDC123	2:24184780-24239495	Protein_coding	CDC123L1	11:26934285-26934303	1	18	CAAAATTAACCTCAAATT	0	intron_variant	KIAA2026	3	0
CDC20	15:16803204-16806935	Protein_coding	CDC20L1	7:54732489-54732502	4	13	TAAAGAAATGTCA	0	intron_variant	ZNF396	13	0
CDC34	20:57960506-57967388	Protein_coding	CDC34L1	23:1865734-1865786	0	na		na	intron_variant	-	9	0
CDCA3	27:38172717-38174963	Protein_coding	CDCA3L1	8:45513621-45513636	1	15	GTGATGTTTTATTTT	na	intron_variant	RGS6	14	4
CDK4	10:1812864-1815815	Protein_coding	CDK4L1	8:44126875-44126889	2	14	CTTTGGCTATTTTT	0	intron_variant	LOC611720	22	1
CDK5	16:15105177-15113085	Protein_coding	CDK5L1	30:18107350-18107365	1	15	AAGAAAAGAGGACTA	na	intron_variant	MYO5A	16	0
CDKL4	17:31189107-31250121	Protein_coding	CDKL4L1	23:29926036-29926056	1	20	ACAGAGAAGATTTCAATTTA	0	intergenic_variant	-	0	0
CDV3	23:30464103-30483633	Protein_coding	CDV3L1	18:54348764-54348779	4	15	AGAATTGCTATACAT	0	intergenic_variant	-	35	0
CDV3	23:30464103-30483633	Protein_coding	CDV3L2	37:18008960-18008977	2	17	TCTTTTTTTTTTTTTTA	0	intron_variant	KANSL1L	35	0
CE10	24:32847081-32848913	Protein_coding	CE10L1	8:73448222-73448240	119	18	AAAGAGGAAAATTGTTTA	0	intron_variant	-	0	0
CENPU	16:45821111-45857636	Protein_coding	CENPUL1	32:22768376-22768392	1	16	TCTTGCCTTCCCTTTT	0	intron_variant	PPP3CA	1	0
CEP57	21:5314290-5360474	Protein_coding	CEP57L1	34:29176913-29176928	1	15	TGTGTCTATGTTTTT	0	intergenic_variant	-	10	0
CFAP20	2:58445932-58459437	Protein_coding	CFAP20L1	14:7631147-7631163	0	16	AAAAAAAAAAAGTATA	na	intergenic_variant	-	0	0
CGGBP1	31:207383-214075	Protein_coding	CGGBP1L1	13:54724191-54724205	2	14	AAAGATACAGATCT	0	intergenic_variant	-	0	0
CHCHD1	4:24217363-24218739	Protein_coding	CHCHD1L1	1:64719513-64719529	2	16	TAAAAATTATTAGAAT	0	intron_variant	NCOA7	4	0
CHCHD2	6:581276-585367	Protein_coding	CHCHD2L1	22:46891494-46891494	1	na		0	intergenic_variant	-	60	1
CHCHD4	20:4268670-4281624	Protein_coding	CHCHD4L1	5:29794489-29794503	65	14	ACAAATAGTTTATA	2	intergenic_variant	-	2	0
CHCHD4	20:4268670-4281624	Protein_coding	CHCHD4L2	11:39883165-39883176	3	11	AAGAGTCTCTT	0	intron_variant,non_coding_transcript_variant	-	2	0
CHCHD4	20:4268670-4281624	Protein_coding	CHCHD4L3	18:12802418-12802436	3	18	AGAAACTTTGTGGTTTAG	na	intergenic_variant	-	2	0
CHMP2B	31:789586-817925	Protein_coding	CHMP2BL1	5:12948472-12948494	1	22	AAAATACAAAAACAGTAGAAAG	0	intron_variant	TECTA	7	0
CHMP4B	24:22995677-23050084	Protein_coding	CHMP4BL1	18:49117126-49117143	2	17	TCAAAATAAAATGAAGG	na	intergenic_variant	-	7	1
CHORDC1	21:10129812-10152416	Protein_coding	CHORDC1L1	2:20437257-20437272	3	15	AGAAGCCGTGATTTG	1	intergenic_variant	-	32	0
CHORDC1	21:10129812-10152416	Protein_coding	CHORDC1L2	7:14170632-14170643	2	11	TGATTAGGGTT	0	intron_variant	XPR1	32	0
CHTOP	7:43418902-43428012	Protein_coding	CHTOPL1	23:42614248-42614263	1	15	AAATCTCCAAAGGGT	na	intron_variant,non_coding_transcript_variant	-	16	0
CHURC1	8:39301090-39318352	Protein_coding	CHURC1L1	37:7910596-7910720	1	na		0	intergenic_variant	-	5	0
CIAPIN1	2:58977592-58992785	Protein_coding	CIAPIN1L1	23:45531993-45532010	15	17	ATTAAATCCGGCAAGTC	2	intron_variant	CLRN1	9	0
CITED2	1:31522911-31525342	Protein_coding	CITED2L1	5:41203228-41203243	2	15	AGAAAATCTGGGTAT	na	upstream_gene_variant	LOC111096110	0	0
CKAP2	25:134914-190810	Protein_coding	CKAP2L1	3:87938790-87938802	1	12	CATATTCTTTTT	0	intron_variant	KCNIP4	14	1
CKAP2	25:134914-190810	Protein_coding	CKAP2L2	32:4779925-4780040	1	na		0	intron_variant	CFAP299	14	1
CKB	8:71284104-71287379	Protein_coding	CKBL1	1:715643-715657	2	14	TCAGCAATATTTTA	0	intron_variant	RBFA	11	5
CKB	8:71284104-71287379	Protein_coding	CKBL2	5:45915849-45915861	18	12	CAAACTGTTTTA	0	intergenic_variant	-	11	5
CKB	8:71284104-71287379	Protein_coding	CKBL3	15:29714284-29714301	1	17	GTTTTCCTGAGATTCTT	0	intron_variant,non_coding_transcript_variant	-	11	5
CKB	8:71284104-71287379	Protein_coding	CKBL4	15:49345607-49345624	1	17	AGAACAAAAGGAAGAGA	0	intron_variant,non_coding_transcript_variant	-	11	5
CKB	8:71284104-71287379	Protein_coding	CKBL5	15:61012023-61012037	1	14	TAATTTTTATCATA	0	intergenic_variant	-	11	5
CKB	8:71284104-71287379	Protein_coding	CKBL6	24:32006297-32006312	17	15	AAAGAAAAAGCCTTA	0	intron_variant	PKIG	11	5
CKB	8:71284104-71287379	Protein_coding	CKBL7	32:35043521-35043537	5	16	CAAAAATGACTGTTTT	0	intergenic_variant	-	11	5
CKS1B	7:42496912-42499907	Protein_coding	CKS1BL1	2:67238394-67238427	1	33	CTAGGTCTGAAAATCATTTTAAAATTGAGCTCA	na	intergenic_variant	-	18	0
CKS1B	7:42496912-42499907	Protein_coding	CKS1BL2	6:21227539-21227553	3	14	TAAATAAATAAAAT	na	upstream_gene_variant	SLC5A11	18	0
CKS1B	7:42496912-42499907	Protein_coding	CKS1BL3	X:31726833-31726850	3	17	AAATTTAACCAGGGAGG	na	intergenic_variant	-	18	0
CLIC1	12:1209777-1215229	Protein_coding	CLIC1L1	15:57021810-57021825	3	15	AAGACCAGTTATTTT	na	intergenic_variant	-	28	2
CLIC1	12:1209777-1215229	Protein_coding	CLIC1L2	22:34782189-34782202	4	13	CAAATAACAATCA	0	intron_variant,non_coding_transcript_variant	-	28	2
CLIC1	12:1209777-1215229	Protein_coding	CLIC1L3	X:60086624-60086640	1	16	TAAACTGTCAAAGACA	na	intron_variant	ATRX	28	2
CLIC1	12:1209777-1215229	Protein_coding	CLIC1L4	X:66931569-66931583	6	14	GAGTAGAAACTCTT	0	intron_variant	DACH2	28	2
CLNS1A	21:21136913-21160703	Protein_coding	CLNS1AL1	16:15851132-15851149	2	17	TAGATCATTTGCATTTA	na	intron_variant	GALNTL5	31	6
CLOCK	13:47684409-47825733	Protein_coding	CLOCKL1	22:48689177-48689190	2	13	AAAATACGAGCTG	1	intergenic_variant	-	0	0
CLPB	21:25710634-25855418	Protein_coding	CLPBL1	13:58749705-58749815	1	na		0	intron_variant	TMPRSS11E	2	0
CLPX	30:29515907-29560318	Protein_coding	CLPXL1	13:23886259-23886275	1	16	CTATAGCTAAACACTT	0	intergenic_variant	-	1	0
CLRN2	3:62958242-62967878	Protein_coding	CLRN2L1	7:32430321-32430338	22	17	AAAAGATTTAAAATTTG	2	intron_variant	RGS7	0	0
CLTC	9:34116344-34183023	Protein_coding	CLTCL1	7:18940978-18940993	1	15	AGTTCATATATTTCT	0	intron_variant	HMCN1	0	0
CMPK1	15:13324235-13357387	Protein_coding	CMPK1L1	1:116654200-116654218	1	18	AAAAGTCAGAACATTTCA	na	intron_variant	THAP8	24	1
CMPK1	15:13324235-13357387	Protein_coding	CMPK1L2	22:7886088-7886107	5	19	TAATAATATACCTAAAATG	0	intron_variant	EPSTI1	24	1
CNBP	20:2860915-2929307	Protein_coding	CNBPL1	32:8865676-8865693	15	17	TTTGCACATATTTTCTT	1	intron_variant	ARHGAP24	39	2
CNIH1	8:30365010-30379356	Protein_coding	CNIH1L1	5:1040270-1040284	1	14	TAAATACTTGCTCA	na	intron_variant	NCAPD3	0	0
CNIH1	8:30365010-30379356	Protein_coding	CNIH1L2	12:11213091-11213101	1	10	TTTTTTTTTA	0	intron_variant	UBR2	0	0
CNIH1	8:30365010-30379356	Protein_coding	CNIH1L3	16:43062747-43062761	3	14	TAAAGTGCATTCTT	na	intergenic_variant	-	0	0
CNN3	6:54378031-54405009	Protein_coding	CNN3L1	9:33126786-33126801	1	15	AAGATCTCCAGAGCC	0	intron_variant	MTMR4	43	0
CNOT10	23:3984505-4053361	Protein_coding	CNOT10L1	22:8159603-8159614	1	11	TCAAAAAACAT	na	intergenic_variant	-	0	0
CNOT7	16:40554214-40571838	Protein_coding	CNOT7L1	25:35432762-35432771	1	9	CGCCCATCG	0	upstream_gene_variant	GFRA2	21	0
CNOT8	4:54935476-54956000	Protein_coding	CNOT8L1	7:63838171-63838187	2	16	CAAAATGTATGAATAT	0	intergenic_variant	-	15	0
COA5	10:44073218-44080346	Protein_coding	COA5L1	29:37314657-37314672	2	15	TGTCACCTACATCTT	0	upstream_gene_variant	-	15	0
COA5	10:44073218-44080346	Protein_coding	COA5L2	36:16827584-16827596	2	12	TTTTTTTTTTTA	0	intron_variant	ITGA6	15	0
COA5	10:44073218-44080346	Protein_coding	COA5L3	X:72421161-72421178	3	17	AGAAATTTTAGGATTGT	0	intergenic_variant	-	15	0
COBLL1	36:9885781-10045104	Protein_coding	COBLL1L1	1:83866508-83866569	1	na		0	intergenic_variant	-	0	0
COIL	9:31745456-31762289	Protein_coding	COILL1	23:32536826-32536843	5	17	TAAAAAAGCAAGACCTA	0	intron_variant	PPP2R3A	10	0
COIL	9:31745456-31762289	Protein_coding	COILL2	32:11410796-11410812	51	16	TAAGAAAAATAAACAA	1	intron_variant	PKD2	10	0
COL25A1	32:29119875-29567994	Protein_coding	COL25A1L1	11:27472584-27472598	1	14	CTGTGATTGTTTTA	0	intron_variant	UHRF2	0	0
COMMD7	24:22035590-22057799	Protein_coding	COMMD7L1	27:43163043-43163050	1	7	TTTTTGT	0	intron_variant	ERC1	9	0
COPB2	23:35536520-35604708	Protein_coding	COPB2L1	8:38330135-38330151	1	16	ATATGGTTATGTTTAA	na	upstream_gene_variant	LOC111097073	0	0
COPS3	5:42143397-42169509	Protein_coding	COPS3L1	11:24498006-24498028	11	22	AAAATGAAATCCTGTCTTATAG	1	intergenic_variant	-	2	0
COPS3	5:42143397-42169509	Protein_coding	COPS3L2	14:36495214-36495228	31	14	TTTGTCTTTTTTCT	0	intergenic_variant	-	2	0
COPS3	5:42143397-42169509	Protein_coding	COPS3L3	14:37264585-37264597	2	12	AATTCTTCTTCG	0	intron_variant	CCDC126	2	0
COPS5	29:16562234-16579082	Protein_coding	COPS5L1	19:50496706-50496722	4	16	CATTTCCTAAATCTTT	na	intergenic_variant	-	18	0
COPS6	6:9500715-9503481	Protein_coding	COPS6L1	4:73449590-73449606	1	16	AAGAATAAAATTTATC	0	intron_variant	TTC23L	7	1
COPS7B	25:43637170-43663218	Protein_coding	COPS7BL1	12:48569474-48569546	1	na		0	intron_variant	UBE2J1	4	0
COPS7B	25:43637170-43663218	Protein_coding	COPS7BL2	26:17856196-17856211	3	15	ACTTTTACATTTTTA	na	intron_variant	ACACB	4	0
COQ2	32:7143476-7162765	Protein_coding	COQ2L1	11:70353061-70353061	1	na		0	intron_variant	ASTN2	36	0
COQ4	9:55182919-55194048	Protein_coding	COQ4L1	5:33126646-33126661	2	15	CTCATTGTGGTTTTG	0	downstream_gene_variant	ODF4	1	0
COQ5	26:16404370-16421507	Protein_coding	COQ5L1	7:23158205-23158215	1	10	CAAATATATA	na	intron_variant,non_coding_transcript_variant	LOC111096654	6	0
COX14	27:4609156-4614325	Protein_coding	COX14L1	34:13907511-13907526	1	15	TCTTTCGTCATTCTT	na	intron_variant	TTC14	0	0
COX16	8:44006532-44032041	Protein_coding	COX16L1	22:59860897-59860918	1	21	ACATCAAAATTTAAAACTTTT	0	intron_variant,non_coding_transcript_variant	-	8	0
COX16	8:44006532-44032041	Protein_coding	COX16L2	X:56417571-56417592	39	21	CCACAGGATTTATTAAGAAGT	0	intron_variant	HDAC8	8	0
COX18	13:61875507-61888065	Protein_coding	COX18L1	37:17619617-17619791	1	na		1	intergenic_variant	-	1	0
COX4I1	5:66883730-66891734	Protein_coding	COX4I1L1	19:13298626-13298641	3	15	TAAAACCCAACTTTA	0	intergenic_variant	-	35	2
CPSF6	10:11265044-11297395	Protein_coding	CPSF6L1	3:37001309-37001325	45	16	TGTATTATTAATTTAT	0	intron_variant	CHRNA7	2	0
CPT2	5:55718209-55786175	Protein_coding	CPT2L1	10:51072620-51072635	31	15	TCTTAACAAAGTCTT	20	intron_variant,non_coding_transcript_variant	-	0	0
CREM	2:1755189-1828746	Protein_coding	CREML1	11:33657664-33657696	1	32	AAGCAGATTTCACTTAAATTCTAATCCTCCTC	na	intergenic_variant	-	5	0
CRK	9:45594657-45627496	Protein_coding	CRKL1	36:26353268-26353284	2	16	CTCTCATCAAATATTT	0	intron_variant,non_coding_transcript_variant	LOC111094249	1	0
CSDE1	17:52418978-52458427	Protein_coding	CSDE1L1	6:62249442-62249457	4	15	AACTTTTCTGAAACA	1	intron_variant	COL24A1	6	0
CSNK1A1	4:59435530-59485591	Protein_coding	CSNK1A1L1	22:44730973-44730991	1	18	CTCACCCTCTGACTTCTT	0	intron_variant	GPC6	2	1
CSNK1A1	4:59435530-59485591	Protein_coding	CSNK1A1L2	35:16853890-16854037	1	na		0	intergenic_variant	-	2	1
CSNK2A1	24:20333593-20390341	Protein_coding	CSNK2A1L1	23:35884025-35884038	1	13	CCCATTTCTTTTT	0	intergenic_variant	-	6	1
CSNK2B	12:1149467-1154417	Protein_coding	CSNK2BL1	8:59317388-59317875	14	na		na	intron_variant	GALC	5	0
CSTF1	24:41604988-41615988	Protein_coding	CSTF1L1	27:1407502-1407518	1	16	AGAAAATGGCCAGGGG	0	intron_variant,non_coding_transcript_variant	-	4	0
CTDNEP1	5:32211185-32216921	Protein_coding	CTDNEP1L1	7:52569045-52569060	1	15	TAAAAAACTGAAACC	na	intergenic_variant	-	14	0
CTNNA1	11:26273322-26459497	Protein_coding	CTNNA1L1	3:33058787-33058972	7	na		na	intron_variant	GABRG3	3	0
CTNNA1	11:26273322-26459497	Protein_coding	CTNNA1L2	3:64359510-64359510	3	na		na	intron_variant	PROM1	3	0
CTNNA1	11:26273322-26459497	Protein_coding	CTNNA1L3	24:2543918-2543934	4	16	AAAATCTTTTTGTTGG	1	intron_variant,non_coding_transcript_variant	LOC102152051	3	0
CTNNBL1	24:26253884-26414940	Protein_coding	CTNNBL1L1	5:79943082-79943098	12	16	GAAAGTCACTGACTCC	0	intron_variant	WWP2	8	0
CTSO	15:53427119-53454364	Protein_coding	CTSOL1	1:108449490-108449506	28	16	TGTTACATTCAATTTC	0	intergenic_variant	-	0	0
CUL1	16:1995637-2086853	Protein_coding	CUL1L1	10:43047731-43047750	1	19	AAAGTAGTCAAGGAAGGAG	na	intron_variant	AFF3	4	0
CUL4A	22:60624215-60667844	Protein_coding	CUL4AL1	13:12069093-12069110	1	17	AAAGAACCAACTCCTGG	0	intergenic_variant	-	2	0
CUL5	5:24393692-24477595	Protein_coding	CUL5L1	6:12812228-12812245	1	17	TGGCTTTACATTCTTTT	0	intron_variant	RADIL	0	0
CWC22	36:23355501-23415059	Protein_coding	CWC22L1	33:20500705-20500722	4	17	AGATTCAATGAAATTTT	0	intergenic_variant	-	2	0
CWF19L2	5:24936700-25080927	Protein_coding	CWF19L2L1	22:25980784-25980798	1	14	AAAAAGAAATGATG	0	intergenic_variant	-	0	0
CYB5A	1:5070817-5106668	Protein_coding	CYB5AL1	1:15211536-15211548	2	12	TAAGAAATTTCC	na	intron_variant	CDH20	49	2
CYB5A	1:5070817-5106668	Protein_coding	CYB5AL2	25:27977790-27977810	28	20	GAAAAAGAGTGAAGAAAGCC	0	intron_variant	MSRA	49	2
CYB5A	1:5070817-5106668	Protein_coding	CYB5AL3	31:9613881-9613897	2	16	GAGAAGAGTGTTTTTT	0	intron_variant	ROBO2	49	2
CYCS	14:38579446-38581983	Protein_coding	CYCSL1	32:24295873-24295887	1	14	AAAAAATCTGGAAA	na	intron_variant	SLC9B1	0	0
DBF4	14:13983832-14019864	Protein_coding	DBF4L1	6:65849500-65849515	1	15	GAAAACAAAACAAAC	0	intergenic_variant	-	0	0
DBI	19:30640429-30645704	Protein_coding	DBIL1	30:767606-767620	1	14	TTGAACGAGTTTTT	na	3_prime_UTR_variant	NOP10	77	6
DBT	6:49753233-49805493	Protein_coding	DBTL1	10:60856474-60856487	6	13	AAATTAAACGTGC	0	intergenic_variant	-	3	0
DCAF13	13:4835147-4860706	Protein_coding	DCAF13L1	16:34358077-34358096	14	19	CTCTCCACTTGGCTTTCTT	0	intergenic_variant	-	18	3
DCAF15	20:48519435-48527701	Protein_coding	DCAF15L1	38:5662731-5662751	12	20	ATTAAACTTTATTAATTTGG	2	intron_variant,non_coding_transcript_variant	-	0	0
DCK	13:60206742-60236338	Protein_coding	DCKL1	11:47104476-47104487	2	11	CAAGATTCTTG	0	intron_variant	LINGO2	9	0
DCK	13:60206742-60236338	Protein_coding	DCKL2	14:44840809-44840827	2	18	AAAAGAAAATCTTTAAAA	0	intergenic_variant	-	9	0
DCP2	4:35256772-35298974	Protein_coding	DCP2L1	1:11193517-11193532	1	15	AAGCAAATAGTTTTG	0	intergenic_variant	-	1	0
DCTN4	4:58423591-58453055	Protein_coding	DCTN4L1	1:108654042-108654058	4	16	AGAAGGTTAGGTTGAC	0	upstream_gene_variant	C5AR2	3	0
DCTN6	16:34119908-34144689	Protein_coding	DCTN6L1	7:60680144-60680161	8	17	ATAAATAAGTATGTTTA	0	intergenic_variant	-	20	1
DCTPP1	6:17679681-17683644	Protein_coding	DCTPP1L1	29:18169221-18169235	2	14	ATAATCAGCTTTTT	0	intron_variant	C29H8orf34	5	1
DCUN1D1	34:15962629-15998910	Protein_coding	DCUN1D1L1	14:56803951-56803964	1	13	CATGTTTAGTTCT	0	intergenic_variant	-	27	0
DCUN1D1	34:15962629-15998910	Protein_coding	DCUN1D1L2	29:22855301-22855319	3	18	CAAATTACTCTCTTTTGT	na	intergenic_variant	-	27	0
DCUN1D2	22:60750547-60778245	Protein_coding	DCUN1D2L1	9:13361735-13361751	1	16	ACAAAGAGATTAAGTT	na	intron_variant	HELZ	6	0
DDA1	20:45440046-45447749	Protein_coding	DDA1L1	21:12758337-12758354	1	17	CGGTGTCAGGTCTTCCT	na	downstream_gene_variant	LOC106560153	20	3
DDIT4	4:22916718-22918893	Protein_coding	DDIT4L1	36:25978733-25978745	1	12	AAATAATGATCA	na	intron_variant	NCKAP1	0	0
DDX18	19:32014586-32030634	Protein_coding	DDX18L1	1:2728310-2728325	2	15	AAGATTCCTTTTCTT	0	3_prime_UTR_variant	GALR1	44	2
DDX18	19:32014586-32030634	Protein_coding	DDX18L2	1:105162574-105162582	9	8	AAAAAGAT	0	intron_variant	ZNF615	44	2
DDX18	19:32014586-32030634	Protein_coding	DDX18L3	13:60735403-60735413	3	10	TAATCTAGAT	na	intergenic_variant	-	44	2
DDX18	19:32014586-32030634	Protein_coding	DDX18L4	20:31990552-31990569	20	17	AGCCAAGAGCCGTTCTT	0	intergenic_variant	-	44	2
DDX18	19:32014586-32030634	Protein_coding	DDX18L5	21:42853777-42853796	168	19	TCAAAAATCTTAGAGAACA	3	intron_variant	NELL1	44	2
DDX18	19:32014586-32030634	Protein_coding	DDX18L6	22:39940117-39940130	2	13	TAAACTAGATGGG	0	intergenic_variant	-	44	2
DDX20	17:63676146-63687503	Protein_coding	DDX20L1	1:70329870-70329889	1	19	CAGGCAATTCCATTTTTAA	0	3_prime_UTR_variant	CDC14B	1	0
DDX21	4:20109719-20134586	Protein_coding	DDX21L1	10:57757937-57757955	3	18	AATAAGAGCTGGGACATG	1	intron_variant,non_coding_transcript_variant	-	11	2
DDX21	4:20109719-20134586	Protein_coding	DDX21L2	30:8242340-8242356	1	16	AAAACTTAGTTAAGGG	0	intergenic_variant	-	11	2
DDX31	9:51631608-51700747	Protein_coding	DDX31L1	8:15866486-15866501	14	15	ATAATAATCCTTTTC	0	intron_variant	MIPOL1	1	0
DDX3X	X:35759367-35775145	Protein_coding	DDX3XL1	6:48015930-48015945	5	15	TTTCAGCTCTATTTT	0	intergenic_variant	-	10	0
DDX3X	X:35759367-35775145	Protein_coding	DDX3XL2	14:18822723-18822740	1	17	TCATTTCTATTTTTTGT	0	intron_variant	VPS50	10	0
DDX43	12:35483428-35499696	Protein_coding	DDX43L1	5:22965835-22965849	3	14	GAAAAAGTAGGAGA	0	intergenic_variant	-	14	0
DDX43	12:35483428-35499696	Protein_coding	DDX43L2	11:14397027-14397041	1	14	CAAATAAGCTTTAA	0	intron_variant	ZNF608	14	0
DDX43	12:35483428-35499696	Protein_coding	DDX43L3	28:17846707-17846724	2	17	TAAAATGTGTTAATTTG	na	intergenic_variant	-	14	0
DDX50	4:20073013-20102622	Protein_coding	DDX50L1	6:52383271-52383286	3	15	AAAGTATAAGCTTCT	0	intron_variant	DPYD	14	0
DDX6	5:15001988-15034128	Protein_coding	DDX6L1	2:21519438-21519477	1	39	CTATATTCTTACAATAAAGTAAGCTAGAGAAAAAAAATA	0	intergenic_variant	-	20	1
DECR1	29:35495348-35544955	Protein_coding	DECR1L1	X:82590424-82590440	1	16	AGAAATTTCCCAAGAG	0	intergenic_variant	-	0	0
DENR	26:6700708-6715513	Protein_coding	DENRL1	28:9230983-9230998	57	15	CCTTTTCATGATTTC	0	intron_variant	ENTPD1	38	0
DET1	3:51725931-51765487	Protein_coding	DET1L1	15:55494830-55494842	1	12	TTTTATTTTTTT	1	intergenic_variant	-	2	0
DHFR	3:26521214-26556065	Protein_coding	DHFRL1	1:29078257-29078273	1	16	CTCAAGGAATAGTTCT	0	intron_variant	MAP7	31	0
DHFR	3:26521214-26556065	Protein_coding	DHFRL2	2:12078552-12078567	32	15	CCACAGTTTGGTTTT	0	intron_variant	NEBL	31	0
DHFR	3:26521214-26556065	Protein_coding	DHFRL3	7:22243467-22243482	15	15	GAGAAGGAAATTTAC	0	intergenic_variant	-	31	0
DHFR	3:26521214-26556065	Protein_coding	DHFRL4	12:18624117-18624141	4	24	TGAAAGAACCACAAAGTTATTTCG	0	intergenic_variant	-	31	0
DHFR	3:26521214-26556065	Protein_coding	DHFRL5	34:5808951-5808967	3	16	TAAATATTAACAATTG	0	intergenic_variant	-	31	0
DHFR	3:26521214-26556065	Protein_coding	DHFRL6	37:14881321-14881336	3	15	CAGAAATTGCTTTTA	0	intron_variant	ZDBF2	31	0
DIDO1	24:46691117-46735117	Protein_coding	DIDO1L1	32:25815833-25815849	6	16	GCATGTGAAAATTTTA	0	intergenic_variant	-	0	0
DLD	18:12703340-12734408	Protein_coding	DLDL1	3:88596369-88596383	33	14	TTAAAAGCATTGGG	0	intron_variant	KCNIP4	6	0
DNAJB1	20:48120604-48131091	Protein_coding	DNAJB1L1	1:33156318-33156343	8	25	GCACCCCTCAAATGTATTATTTCTT	1	intron_variant,non_coding_transcript_variant	-	24	0
DNAJC14	10:206477-213304	Protein_coding	DNAJC14L1	34:9885779-9885791	2	12	GCAGCTCACTTT	0	downstream_gene_variant	-	2	0
DNAJC15	22:7746726-7825635	Protein_coding	DNAJC15L1	1:70891954-70891968	1	14	AAAACCACCATGAG	na	intron_variant	ERCC6L2	46	1
DNAJC17	30:7904519-7945222	Protein_coding	DNAJC17L1	19:3278408-3278426	1	18	TATTTCTAGCATCTTCTA	na	intron_variant,non_coding_transcript_variant	LOC111091093	14	0
DNAJC19	34:14199507-14204736	Protein_coding	DNAJC19L1	2:2261694-2261712	3	18	GCTGCACCTTGTTTTTTT	na	intron_variant	PARD3	114	8
DNAJC19	34:14199507-14204736	Protein_coding	DNAJC19L2	7:10178224-10178239	1	15	AAACAGGGAAATATG	0	intron_variant	LPGAT1	114	8
DNAJC19	34:14199507-14204736	Protein_coding	DNAJC19L3	11:60128308-60128321	6	13	AAAAGATGGGAAG	0	intron_variant	SMC2	114	8
DNAJC19	34:14199507-14204736	Protein_coding	DNAJC19L4	21:39631317-39631334	22	17	AATAAATAAACAAATTC	0	intron_variant	PLEKHA7	114	8
DNAJC24	18:35935826-36024062	Protein_coding	DNAJC24L1	1:13398611-13398626	10	15	CAAAGTGGGAAGCGC	1	intron_variant,non_coding_transcript_variant	-	16	0
DNAJC8	2:72193766-72218955	Protein_coding	DNAJC8L1	16:13556093-13556110	8	17	AAGAAAAGCAAATTAAA	0	intergenic_variant	-	41	2
DNAJC8	2:72193766-72218955	Protein_coding	DNAJC8L2	20:58126085-58126099	3	14	TCTTTTTTTAACTT	na	intergenic_variant	-	41	2
DNAJC8	2:72193766-72218955	Protein_coding	DNAJC8L3	22:7249810-7249826	1	16	AAAAAGCTCAGTGGAT	0	intron_variant	ENOX1	41	2
DND1	2:35825154-35827913	Protein_coding	DND1L1	5:86012184-86012200	4	16	CCCAATGTGGGACTTA	2	intron_variant,non_coding_transcript_variant	LOC111096063	10	0
DNMT3A	17:19489524-19563074	Protein_coding	DNMT3AL1	4:68529377-68529393	2	16	TGTGGGTCTGATTTTA	0	intergenic_variant	-	4	0
DNPH1	12:11715215-11718622	Protein_coding	DNPH1L1	4:71264279-71264295	3	16	AAGAATTAGGACTTCA	na	intron_variant	WDR70	10	1
DPF2	18:51833085-51847213	Protein_coding	DPF2L1	10:26651580-26651595	2	15	GAAAACCTTGGGTCT	0	intergenic_variant	-	5	0
DPF2	18:51833085-51847213	Protein_coding	DPF2L2	29:17395393-17395408	2	15	AAGAATAAAACTTCA	na	intergenic_variant	-	5	0
DPH3	23:26522367-26529808	Protein_coding	DPH3L1	1:75445522-75445540	1	18	AAAAAATGTAGAGCACAG	0	intergenic_variant	-	16	1
DPH3	23:26522367-26529808	Protein_coding	DPH3L2	5:8810847-8810862	3	15	AAAAATAAGTGAGGG	na	intron_variant	-	16	1
DPH6	30:3000723-3146568	Protein_coding	DPH6L1	15:63143423-63143437	19	14	AAAACTGAAAGTCT	0	intergenic_variant	-	0	0
DPM1	24:37249203-37268620	Protein_coding	DPM1L1	24:20649972-20649988	2	16	CTAGCAACTTTATTTT	na	intron_variant	DEFB127	2	0
DPPA2	33:14458001-14465756	Protein_coding	DPPA2L1	17:54191364-54191380	107	16	AGAAGCAACACAGGAT	0	intergenic_variant	-	49	0
DPPA2	33:14458001-14465756	Protein_coding	DPPA2L2	20:5209426-5209441	3	15	AGCATCTGCCTTTGG	0	intergenic_variant	-	49	0
DPPA2	33:14458001-14465756	Protein_coding	DPPA2L3	22:33949716-33949730	12	14	AAATTGCCTTTGCC	0	intergenic_variant	-	49	0
DPPA4	33:14483212-14495319	Protein_coding	DPPA4L1	14:42092036-42092054	3	18	AAAATATAGCTCATATAT	0	intron_variant	CPVL	24	5
DPPA4	33:14483212-14495319	Protein_coding	DPPA4L2	19:12560027-12560045	19	18	CAAGAAAAAGTACAACTC	0	intron_variant,non_coding_transcript_variant	LOC102151797	24	5
DPPA4	33:14483212-14495319	Protein_coding	DPPA4L3	27:29258417-29258431	1	14	ATAAATACTCTTTA	0	intergenic_variant	-	24	5
DPPA4	33:14483212-14495319	Protein_coding	DPPA4L4	28:15469473-15469493	2	20	AGAACTCTTTAAGGTTGGAG	0	intron_variant	CNNM2	24	5
DPY30	17:25368121-25380882	Protein_coding	DPY30L1	2:52721020-52721036	20	16	GTCAACTCCCTATTTA	1	intron_variant,non_coding_transcript_variant	LOC111092486	29	1
DSTN	24:5394972-5402443	Protein_coding	DSTNL1	7:37144001-37144033	1	32	CTTCCACTCAACAGTGTTGAAACTGGAAAAAA	0	intron_variant	SMYD3	30	0
DSTN	24:5394972-5402443	Protein_coding	DSTNL2	11:28171639-28171654	1	15	TTATTATTGTTTTCT	0	intron_variant,non_coding_transcript_variant	-	30	0
DTD1	24:4452053-4637186	Protein_coding	DTD1L1	21:16453440-16453455	1	15	GCCAACTAGACTTTT	0	intron_variant,non_coding_transcript_variant	-	8	0
DTD2	8:10694999-10706155	Protein_coding	DTD2L1	22:38912311-38912326	254	15	ATCTTTTGATATCTT	na	intergenic_variant	-	7	0
DUSP14	9:37253305-37277320	Protein_coding	DUSP14L1	1:63569104-63569119	4	15	TGATATCAAATTTGT	0	intron_variant	NKAIN2	0	0
DUT	30:14572766-14585621	Protein_coding	DUTL1	35:23748123-23748272	0	na		na	intergenic_variant	-	68	0
EAPP	8:13316239-13399221	Protein_coding	EAPPL1	8:10999391-10999408	5	17	AAGAAGGAACATCACAG	0	intron_variant	NUBPL	7	0
EAPP	8:13316239-13399221	Protein_coding	EAPPL2	11:62615143-62615160	3	17	TAAAAAGACCTCTTAGG	na	intergenic_variant	-	7	0
EAPP	8:13316239-13399221	Protein_coding	EAPPL3	16:52480768-52480784	1	16	CCTCTCAACAAATTTC	na	intergenic_variant	-	7	0
EAPP	8:13316239-13399221	Protein_coding	EAPPL4	X:99043347-99043362	1	15	GCATCTGTATCTTTG	0	intergenic_variant	-	7	0
EBAG9	13:10081700-10099737	Protein_coding	EBAG9L1	20:32623219-32623234	1	15	ACCTTTTTCTAATTT	0	intron_variant	SLMAP	26	0
ECHDC1	1:66012245-66073008	Protein_coding	ECHDC1L1	7:67596095-67596111	1	16	CAAATTTGGACTTTGT	0	intron_variant	YES1	5	1
ECI2	35:4349075-4367662	Protein_coding	ECI2L1	30:10712830-10712830	1	na		na	intron_variant	FRMD5	5	1
EDF1	9:48722918-48726358	Protein_coding	EDF1L1	34:12810494-12810507	1	13	AAAGATGAGTTGC	na	intron_variant	MFN1	25	4
EEF1E1	35:8012304-8035176	Protein_coding	EEF1E1L1	26:11472594-11472613	2	19	CTTAAGATTAAGATTTGGG	0	intron_variant	TBX5	7	0
EEF2	20:55577413-55586422	Protein_coding	EEF2L1	14:52523502-52523518	5	16	TGGAATCAACAATTTC	0	intron_variant,non_coding_transcript_variant	LOC102155062	5	1
EEF2	20:55577413-55586422	Protein_coding	EEF2L2	32:6208314-6208387	1	na		0	intron_variant,non_coding_transcript_variant	LOC102152686	5	1
EI24	5:8949886-8963967	Protein_coding	EI24L1	1:49336613-49336615	149	2	AG	na	intron_variant	SLC22A2	67	1
EI24	5:8949886-8963967	Protein_coding	EI24L2	7:48980491-48980508	2	17	GGGTATTTACTTTTTTT	0	intron_variant,non_coding_transcript_variant	-	67	1
EIF1	9:21098869-21101612	Protein_coding	EIF1L1	5:39861099-39861112	3	13	AACTGAAAATTCC	0	intron_variant	TTC19	143	0
EIF1	9:21098869-21101612	Protein_coding	EIF1L2	11:26082694-26082704	15	10	AAAAAAAAAA	0	intron_variant	ETF1	143	0
EIF1	9:21098869-21101612	Protein_coding	EIF1L3	14:51011019-51011036	5	17	CAATAGCTTTCATTTTT	0	intron_variant	-	143	0
EIF1	9:21098869-21101612	Protein_coding	EIF1L4	17:63971861-63971875	1	14	AGAACTTCTATGTT	0	intron_variant	OVGP1	143	0
EIF1	9:21098869-21101612	Protein_coding	EIF1L5	22:26957130-26957147	1	17	CCCACCCAAGAATTTTA	0	intron_variant	PIBF1	143	0
EIF1	9:21098869-21101612	Protein_coding	EIF1L6	35:3054822-3054837	2	15	TAAAACTAACGCAAC	0	intron_variant	-	143	0
EIF1AX	X:16081335-16102627	Protein_coding	EIF1AXL1	3:18056702-18056720	4	18	TCCAAAGCTTTTTGTTTT	0	intron_variant	ADGRV1	21	0
EIF1AX	X:16081335-16102627	Protein_coding	EIF1AXL2	4:14891370-14891406	1	36	TGTGTGTGTGTGTGTGCGCGCGCCCATGTGCTTTTC	0	intron_variant,non_coding_transcript_variant	-	21	0
EIF1AX	X:16081335-16102627	Protein_coding	EIF1AXL3	11:5387809-5387825	2	16	GTTTTTATAAATTTTA	0	intron_variant	CDO1	21	0
EIF1AX	X:16081335-16102627	Protein_coding	EIF1AXL4	27:21876226-21876243	7	17	TGGCTTTTCCTATTTTT	0	intron_variant	LMNTD1	21	0
EIF2AK1	6:11447225-11478611	Protein_coding	EIF2AK1L1	22:16730210-16730225	1	15	GAAAGTCTACTCTCT	na	intergenic_variant	-	3	0
EIF2AK2	17:29494641-29537933	Protein_coding	EIF2AK2L1	10:51578250-51578265	2	15	TACACTAAGGATTTT	0	intron_variant	NRXN1	0	0
EIF2B2	8:48110521-48117175	Protein_coding	EIF2B2L1	8:6327842-6327846	3	4	GGAT	na	intron_variant,non_coding_transcript_variant	LOC111096972	0	0
EIF2B2	8:48110521-48117175	Protein_coding	EIF2B2L2	19:19555828-19555845	3	17	TAAATTTCAAGTAATTG	1	intergenic_variant	-	0	0
EIF2B3	15:15337421-15481427	Protein_coding	EIF2B3L1	12:36167061-36167076	1	15	AAAAATCATGGAACA	na	upstream_gene_variant	-	1	0
EIF2B3	15:15337421-15481427	Protein_coding	EIF2B3L2	X:112498245-112498260	3	15	AAGAAAAATATTTCA	0	intergenic_variant	-	1	0
EIF2D	38:2851972-2871518	Protein_coding	EIF2DL1	8:33362077-33362092	17	15	TAAAGGAATGGATGG	0	intergenic_variant	-	2	0
EIF2S3	X:19662132-19680223	Protein_coding	EIF2S3L1	8:14124302-14124318	94	16	GGTCTTTTGTGGTTCC	15	intergenic_variant	-	8	0
EIF2S3	X:19662132-19680223	Protein_coding	EIF2S3L2	8:41638264-41638280	3	16	TAAATAAATAAATCTT	na	intron_variant	RDH11	8	0
EIF3F	21:31514930-31525651	Protein_coding	EIF3FL1	5:12312642-12312657	2	15	AAAAAATTTTAATTT	na	intron_variant	LOC106558787	16	1
EIF3F	21:31514930-31525651	Protein_coding	EIF3FL2	22:7931392-7931403	10	11	AATATATTCTC	0	intron_variant	EPSTI1	16	1
EIF3I	2:68977359-68986004	Protein_coding	EIF3IL1	13:47902697-47902707	1	10	CCCTGGTTCT	0	intron_variant	NMU	20	1
EIF3I	2:68977359-68986004	Protein_coding	EIF3IL2	30:12682033-12682047	4	14	TAAAATAATGCTTA	0	intron_variant,non_coding_transcript_variant	-	20	1
EIF3I	2:68977359-68986004	Protein_coding	EIF3IL3	30:15657404-15657404	1	na		0	intron_variant	FAM227B	20	1
EIF3J	30:11207620-11233106	Protein_coding	EIF3JL1	15:21916417-21916432	1	15	CTGATATTTTGTTTA	0	intron_variant	SYT1	16	1
EIF3J	30:11207620-11233106	Protein_coding	EIF3JL2	36:668349-668364	3	15	GGACTTAAGAATTCT	0	intron_variant	GALNT13	16	0
EIF3K	1:114433373-114443911	Protein_coding	EIF3KL1	23:9681614-9681630	25	16	TAGCATTTTTATTTTT	0	intron_variant	MYRIP	19	0
EIF3L	10:26757639-26784908	Protein_coding	EIF3LL1	7:34555356-34555372	3	16	TAATTTTGAAATTTTT	0	intron_variant	SDCCAG8	15	1
EIF4A1	9:24248428-24249949	Protein_coding	EIF4A1L1	27:18306895-18306912	3	17	ATAAACAGACAAAAATG	na	intron_variant	TMTC1	na	0
EIF4B	27:2118233-2150455	Protein_coding	EIF4BL1	4:54523013-54523030	25	17	CAAAAAAAAAAGTGATG	0	intergenic_variant	-	35	2
EIF4B	27:2118233-2150455	Protein_coding	EIF4BL2	12:49183637-49183651	7	14	TGGCCTGGAGTTTT	0	intron_variant	BACH2	35	2
EIF4B	27:2118233-2150455	Protein_coding	EIF4BL3	18:16670414-16670429	27	15	TTTGTACAGTTTTCT	0	intron_variant	RELN	35	2
EIF4B	27:2118233-2150455	Protein_coding	EIF4BL4	20:46772328-46772345	1	17	CGTATTTGGAGTTTCTT	0	3_prime_UTR_variant	WIZ	35	2
EIF4B	27:2118233-2150455	Protein_coding	EIF4BL5	24:24189308-24189321	3	13	GAGACCTCAGTGT	na	downstream_gene_variant	PROCR	35	2
EIF4B	27:2118233-2150455	Protein_coding	EIF4BL6	33:19364340-19364354	1	14	AAAAAATATTTGAG	na	intron_variant,non_coding_transcript_variant	LOC111093794	35	2
EIF4E	32:21064202-21108998	Protein_coding	EIF4EL1	4:4484518-4484531	2	13	AGAGTGGGAGATT	0	intron_variant	B3GALNT2	136	1
EIF4E	32:21064202-21108998	Protein_coding	EIF4EL2	7:47107553-47107574	1	21	TCAATTGCCTTAATATTCTTT	0	intron_variant,non_coding_transcript_variant	-	136	1
EIF4E	32:21064202-21108998	Protein_coding	EIF4EL3	8:18679378-18679395	27	17	CAGAAACTTCCATTCTG	0	intergenic_variant	-	136	1
EIF4E	32:21064202-21108998	Protein_coding	EIF4EL4	12:33511003-33511017	3	14	TAGTCATTATTCCT	na	intron_variant,non_coding_transcript_variant	-	136	1
EIF4E	32:21064202-21108998	Protein_coding	EIF4EL5	13:49315949-49316008	1	na		na	intergenic_variant	-	136	1
EIF4E	32:21064202-21108998	Protein_coding	EIF4EL6	27:13867053-13867076	2	23	TATCCATTAGCTTTTCTTTTTTT	na	intron_variant	SLC2A13	136	1
EIF4E	32:21064202-21108998	Protein_coding	EIF4EL7	28:11546283-11546297	80	14	AGAAATGCATCTTA	na	downstream_gene_variant	HPS1	136	1
EIF4E	32:21064202-21108998	Protein_coding	EIF4EL8	31:11177825-11177839	2	14	AAAAAAACTATATC	0	intron_variant	LIPI	136	1
EIF4E	32:21064202-21108998	Protein_coding	EIF4EL9	38:7593530-7593545	2	15	AAAAAGAATATATAT	0	intergenic_variant	-	136	1
EIF4H	6:6180189-6202835	Protein_coding	EIF4HL1	10:6029579-6029594	1	15	TCAATGTGCTCCTTC	0	intron_variant	PPM1H	15	0
ELAVL4	15:10885161-10975640	Protein_coding	ELAVL4L1	2:59424256-59424269	1	13	AAAACGAATATTG	na	intron_variant	SLC12A3	4	0
ELK1	X:41256205-41270656	Protein_coding	ELK1L1	12:18516395-18516411	3	16	AATAAAAAGAAAATTA	na	intergenic_variant	-	5	0
ELOC	29:22452254-22476523	Protein_coding	ELOCL1	4:55211009-55211024	4	15	TAAAATGTGTTTAAA	0	intergenic_variant	-	0	0
ELOC	29:22452254-22476523	Protein_coding	ELOCL2	12:11614283-11614311	2	28	CTATAGTCCACATTATTATTATTTTTTT	0	intron_variant	PTK7	0	0
ELOC	29:22452254-22476523	Protein_coding	ELOCL3	15:9768621-9768636	114	15	TCCTTAGGAATTTTT	0	intergenic_variant	-	0	0
ELOF1	20:49821968-49828052	Protein_coding	ELOF1L1	15:399941-399954	3	13	AAAAACAGTACTG	0	intergenic_variant	-	10	0
ELOF1	20:49821968-49828052	Protein_coding	ELOF1L2	15:3569062-3569078	2	16	AGATGCTAACAACCTT	na	intron_variant	MACF1	10	0
EMC4	30:860769-864681	Protein_coding	EMC4L1	19:30414403-30416042	2	na		na	intron_variant	CFAP221	15	0
EMC6	9:47497354-47498861	Protein_coding	EMC6L1	1:88398840-88398856	13	16	CTCAGATTATGATCTT	0	intron_variant	PIP5K1B	0	0
EMC9	8:4133997-4136144	Protein_coding	EMC9L1	37:14690461-14690475	1	14	AAAAAAAAAAAACA	0	intron_variant	NDUFS1	0	0
ENAH	7:39105024-39250126	Protein_coding	ENAHL1	5:76095534-76095534	1	na		0	intron_variant	GLG1	1	0
ENO1	5:62300805-62314508	Protein_coding	ENO1L1	6:44720874-44720896	109	22	CTGTCTCGCTGAGTATTTCTTT	0	upstream_gene_variant	LOC111096360	16	0
ENO3	5:31662284-31667498	Protein_coding	ENO3L1	1:33482556-33482687	1	na		0	intergenic_variant	-	42	2
ENO3	5:31662284-31667498	Protein_coding	ENO3L2	5:70018506-70018521	3	15	GCTTTCTAAGTTTTG	na	intergenic_variant	-	42	2
ENOPH1	32:6408778-6451606	Protein_coding	ENOPH1L1	1:100882258-100882373	1	na		0	upstream_gene_variant	-	20	0
ENPP3	12:97426-195939	Protein_coding	ENPP3L1	23:38828467-38828479	11	12	TCTTGAGTTCTT	0	intron_variant	SLC9A9	0	0
ENSA	17:59800822-59807884	Protein_coding	ENSAL1	35:10793872-10793885	3	13	TAAATATTTTGCC	na	intron_variant	SMIM13	20	1
EPHA8	2:76703538-76739327	Protein_coding	EPHA8L1	15:58756431-58756445	1	14	AAAATGGCATTTAA	na	intergenic_variant	-	0	0
EPSTI1	22:7862068-7956077	Protein_coding	EPSTI1L1	30:15796199-15796207	1	8	AGAAGGGA	na	intron_variant,non_coding_transcript_variant	LOC102155157	0	0
ERG28	8:48642610-48651637	Protein_coding	ERG28L1	12:17961836-17961850	1	14	AAGAACAAATATAA	0	intergenic_variant	-	0	0
ERH	8:43211168-43225307	Protein_coding	ERHL1	4:24113288-24113300	7	12	GCTTAAATTTTC	0	intron_variant	USP54	62	0
ERH	8:43211168-43225307	Protein_coding	ERHL2	21:24481991-24482009	8	18	ATCCTTGTTCCTGATCTT	0	intergenic_variant	-	62	0
ERLEC1	10:54815592-54845776	Protein_coding	ERLEC1L1	4:53617740-53617754	4	14	TAAACATAACTCAA	0	intron_variant	SGCD	1	0
ESCO2	25:29785641-29812536	Protein_coding	ESCO2L1	1:59290407-59290424	5	17	TAATTTTTATAATTTTT	0	intergenic_variant	-	2	0
ESCO2	25:29785641-29812536	Protein_coding	ESCO2L2	22:41457183-41457199	1	16	AAAACTTCAAAAGAAG	0	intergenic_variant	-	2	0
ESD	22:4544657-4569986	Protein_coding	ESDL1	1:102105336-102105352	2	16	GAGACAAAGTATTCTT	na	upstream_gene_variant	ZNF580	50	2
ESD	22:4544657-4569986	Protein_coding	ESDL2	12:28925580-28925664	1	na		0	intergenic_variant	-	50	2
ESR1	1:42081952-42368544	Protein_coding	ESR1L1	22:10782957-10782972	3	15	TAAAAATAGAATGTT	0	intergenic_variant	-	1	0
EWSR1	26:22578782-22608174	Protein_coding	EWSR1L1	7:34021565-34021582	129	17	TAAAAGATTGTCGAATT	0	intergenic_variant	-	13	8
EWSR1	26:22578782-22608174	Protein_coding	EWSR1L2	10:12992344-12992361	3	17	TTAAACAGGTGAACTTT	0	intergenic_variant	-	13	8
EWSR1	26:22578782-22608174	Protein_coding	EWSR1L3	12:32336527-32336541	3	14	GAAGTTGGACTTTT	na	intron_variant	LMBRD1	13	8
EWSR1	26:22578782-22608174	Protein_coding	EWSR1L4	18:22847821-22847853	1	32	TAAATAATGTTCTGTGGACACGTGCATGTATT	0	intron_variant,non_coding_transcript_variant	-	13	8
EWSR1	26:22578782-22608174	Protein_coding	EWSR1L5	32:27326109-27326128	9	19	ATGTATATTATCTCATTTA	0	intergenic_variant	-	13	8
EWSR1	26:22578782-22608174	Protein_coding	EWSR1L6	33:16687235-16687252	3	17	TAGGAATACCAAGGTTG	na	intron_variant	TMPRSS7	13	8
EWSR1	26:22578782-22608174	Protein_coding	EWSR1L7	34:36713192-36713313	1	na		0	intron_variant	TNFSF10	13	8
EXOC6	28:7190918-7414367	Protein_coding	EXOC6L1	13:56539776-56539792	3	16	ATTTTTTTCTTTTTTA	0	intergenic_variant	-	0	0
EXOSC1	28:10729186-10738978	Protein_coding	EXOSC1L1	X:43705948-43705965	4	17	AAAATACTGTGAGGGGG	0	intergenic_variant	-	13	0
FAM118A	10:20713549-20737569	Protein_coding	FAM118AL1	1:102769169-102769246	1	na		0	intergenic_variant	-	0	0
FAM118B	5:8253655-8300341	Protein_coding	FAM118BL1	22:49632939-49632952	3	13	TGTTCAAGGTCTT	na	intron_variant	CLYBL	4	0
FAM126A	14:36594263-36718960	Protein_coding	FAM126AL1	28:2232167-2232181	1	14	GAGCACTTGCTTCT	0	intergenic_variant	-	1	0
FAM133B	14:18145882-18168367	Protein_coding	FAM133BL1	8:24238817-24238833	1	16	AAGAGGGTTTGGAGAA	na	intron_variant	MDGA2	19	0
FAM133B	14:18145882-18168367	Protein_coding	FAM133BL2	17:62739997-62740013	3	16	TATACCAGTTTTTTTA	na	intron_variant	SLC16A1	19	0
FAM133B	14:18145882-18168367	Protein_coding	FAM133BL3	26:7406518-7406534	11	16	AAAAAAATAAAAATAA	0	intergenic_variant	-	19	0
FAM133B	14:18145882-18168367	Protein_coding	FAM133BL4	29:31980926-31981012	14	na		0	downstream_gene_variant	CA2	19	0
FAM151B	3:26614337-26646997	Protein_coding	FAM151BL1	1:61951583-61951600	1	17	TGGACATTCTTTTTTTT	0	intergenic_variant	-	0	0
FAM168B	19:20734167-20775792	Protein_coding	FAM168BL1	11:67594148-67594225	2	na		0	intron_variant	SLC31A1	10	2
FAM168B	19:20734167-20775792	Protein_coding	FAM168BL2	16:34984194-34984211	3	17	CCAAGTTGGAAATTCTT	na	intron_variant	TNKS	10	2
ABITRAM	11:64094653-64100078	Protein_coding	ABITRAML1	12:8208147-8208154	54	7	TGTTTTA	0	downstream_gene_variant	-	14	1
FAM32A	20:46292497-46297991	Protein_coding	FAM32AL1	22:61136904-61137160	1	na		na	intron_variant	RASA3	33	0
DENND10	28:29325721-29369218	Protein_coding	DENND10L1	5:69096114-69096129	1	15	CCTGTCACCATATAT	na	intron_variant	CDH13	4	0
DENND10	28:29325721-29369218	Protein_coding	DENND10L2	5:77126112-77126122	6	10	AGATATTTAT	0	upstream_gene_variant	CMTR2	4	0
FAM91A1	13:22036518-22082278	Protein_coding	FAM91A1L1	1:102565442-102565442	1	na		2	intergenic_variant	-	6	0
CIAO2A	30:28582048-28597856	Protein_coding	CIAO2AL1	7:54923963-54923979	1	16	AAAAAAATAAATCTCT	0	intron_variant	MAPRE2	35	1
CIAO2A	30:28582048-28597856	Protein_coding	CIAO2AL2	9:38174264-38174327	1	na		0	intron_variant	SLFN5	35	1
FAN1	3:38013744-38052619	Protein_coding	FAN1L1	19:18427148-18427167	2	19	TCAAAGGCAATGTTTCAAA	0	intron_variant	ANXA5	2	0
FAR2	27:18659688-18791757	Protein_coding	FAR2L1	27:599295-599306	1	11	CTCCATTTCTT	0	intron_variant,non_coding_transcript_variant	-	0	0
FARSB	37:28647114-28716193	Protein_coding	FARSBL1	15:1203210-1203224	169	14	GACAGACTCTTTTT	1	intergenic_variant	-	4	0
FARSB	37:28647114-28716193	Protein_coding	FARSBL2	21:14758136-14758153	29	17	TGCTTTATAAACTTTCT	0	intron_variant	DLG2	4	0
FARSB	37:28647114-28716193	Protein_coding	FARSBL3	37:10908716-10908725	3	9	TGTTTTTGG	na	intron_variant	CDK15	4	0
FASTKD5	24:18124249-18136415	Protein_coding	FASTKD5L1	9:47443817-47443944	1	na		0	5_prime_UTR_variant	TRPV1	0	0
FBLIM1	2:81820129-81837617	Protein_coding	FBLIM1L1	6:59601928-59601928	1	na		0	intron_variant	PKN2	14	0
FBXL5	3:64683770-64727161	Protein_coding	FBXL5L1	32:14131894-14131905	1	11	TATATAATTTT	na	intron_variant	CCSER1	1	0
FBXO22	30:40100768-40127708	Protein_coding	FBXO22L1	1:100923150-100923167	113	17	CAAGATTCCACATAAGT	0	intergenic_variant	-	1	0
FDPS	7:42241086-42250373	Protein_coding	FDPSL1	33:19795546-19795561	1	15	TAATTATTACCCATA	na	intergenic_variant	-	45	2
FDX1	5:22452011-22485581	Protein_coding	FDX1L1	X:31171149-31171161	2	12	AAGGATTTATGA	0	intron_variant	-	15	0
FEZ1	5:9001927-9044330	Protein_coding	FEZ1L1	15:2414240-2414254	7	14	TGGCCAACATTCTT	na	intergenic_variant	-	1	1
FGF4	18:48413480-48417494	Protein_coding	FGF4L1	18:20443708-20443726	21	18	AAATAAGTCAGACAGAGA	0	intergenic_variant	-	2	0
FGF4	18:48413480-48417494	Protein_coding	FGF4L2	12:33710166-33710178	22	12	CAAGTGCTTTGA	0	intergenic_variant	-	2	0
FGF4	18:48413480-48417494	Protein_coding	FGF4L3	22:47761861-47761878	4	17	AAGAATATTCTGGTTGT	0	intergenic_variant	-	2	0
FGF4	18:48413480-48417494	Protein_coding	FGF4L4	36:11456182-11456199	1	17	AATTACCAAAGTACTAT	na	intron_variant,non_coding_transcript_variant	LOC102153897	2	0
FKBP3	8:22550241-22560501	Protein_coding	FKBP3L1	7:55149809-55149925	1	na		0	intron_variant	DTNA	42	4
FKBP3	8:22550241-22560501	Protein_coding	FKBP3L2	23:16784083-16784099	7	16	ATAGAATTGAACCAAG	0	frameshift_variant,stop_lost	SLC4A7	42	4
FKBP3	8:22550241-22560501	Protein_coding	FKBP3L3	X:104045254-104045271	3	17	AAAGAAATGGGAAAATT	na	intergenic_variant	-	42	4
FKBP4	27:41950087-41959136	Protein_coding	FKBP4L1	21:35064414-35064432	1	18	ATAACATAACTTTATGGA	0	intron_variant	DKK3	21	0
FKBP5	12:4724668-4833691	Protein_coding	FKBP5L1	17:3641748-3641748	1	na		na	intergenic_variant	-	6	0
FKBP7	36:22090094-22101230	Protein_coding	FKBP7L1	23:2029031-2029048	1	17	AAGAATTATAACAAATT	na	intron_variant	TOPAZ1	1	0
FKTN	11:61394002-61462056	Protein_coding	FKTNL1	1:59782022-59782044	3	22	AGGATAGGAAGGATGGGTTGTT	na	intergenic_variant	-	1	0
FTO	2:61699864-62080197	Protein_coding	FTOL1	3:42178903-42178920	22	17	TCTGCATATGCTTTTTT	2	intron_variant	-	1	0
FUNDC2	X:123046451-123064580	Protein_coding	FUNDC2L1	6:65848123-65848142	1	19	AATAATGTTGAGTAAAGAA	na	intergenic_variant	-	45	0
FUNDC2	X:123046451-123064580	Protein_coding	FUNDC2L2	19:40713849-40713867	19	18	CTACACTCAAAATTTTAA	0	intergenic_variant	-	45	0
FUS	6:17059904-17071227	Protein_coding	FUSL1	17:6901512-6901525	1	13	TATTTATTTATTT	na	intron_variant	TAF1B	28	0
FUS	6:17059904-17071227	Protein_coding	FUSL2	25:34779287-34779297	1	10	AAAAAAAAAA	0	intron_variant	PPP3CC	28	0
FXR1	34:14129978-14192016	Protein_coding	FXR1L1	19:26515548-26515559	3	11	AAATGAAATAT	0	intergenic_variant	-	5	0
FXR1	34:14129978-14192016	Protein_coding	FXR1L2	23:9277237-9277249	3	12	AATCTGTTTGAA	0	downstream_gene_variant	-	5	0
G3BP1	4:57541627-57585375	Protein_coding	G3BP1L1	18:30609500-30609518	119	18	GCAATAACTGACTATTTC	1	intergenic_variant	-	33	0
G3BP1	4:57541627-57585375	Protein_coding	G3BP1L2	33:22607889-22607901	1	12	AGAATGGCTATT	0	intergenic_variant	-	33	0
G6PD	X:122217317-122231862	Protein_coding	G6PDL1	33:26953990-26954054	3	na		1	downstream_gene_variant	CCDC14	6	0
GABARAP	5:32207879-32209976	Protein_coding	GABARAPL1	8:20790995-20791012	4	17	CAGGAAAGTGCAAAAGG	0	intergenic_variant	-	86	0
GALNT1	7:54390144-54512908	Protein_coding	GALNT1L1	20:29506619-29506637	1	18	AAGAAATCTGAAGTTCTG	0	intergenic_variant	-	54	0
GALNT1	7:54390144-54512908	Protein_coding	GALNT1L2	23:37106460-37106475	1	15	AGAATTTGTTTATTT	0	intron_variant,non_coding_transcript_variant	LOC102154628	54	0
GALT	11:51319812-51323337	Protein_coding	GALTL1	8:69891064-69891079	4	15	CAGATTTTTACCTTG	0	intron_variant	PPP2R5C	25	0
GALT	11:51319812-51323337	Protein_coding	GALTL2	14:27339007-27339022	1	15	CATGAGATCCTTTTA	0	intergenic_variant	-	25	0
GALT	11:51319812-51323337	Protein_coding	GALTL3	20:41125924-41125940	1	16	AGTGTACTTCATTTTC	0	intron_variant	DHX30	25	0
GAP43	33:19668491-19770509	Protein_coding	GAP43L1	1:93720802-93720815	3	13	GGATTGTTTTCTT	0	downstream_gene_variant	LOC111096981	0	0
GAP43	33:19668491-19770509	Protein_coding	GAP43L10	21:15530298-15530308	2	10	TATATTTTAA	0	intron_variant	DLG2	0	0
GAP43	33:19668491-19770509	Protein_coding	GAP43L11	21:16164722-16164738	17	16	AACAATCTGGACATCA	0	intron_variant	RAB30	0	0
GAP43	33:19668491-19770509	Protein_coding	GAP43L12	21:22142915-22142934	5	19	ACAAGAAAATTACAGACCA	1	intergenic_variant	-	0	0
GAP43	33:19668491-19770509	Protein_coding	GAP43L13	21:29267935-29267944	1	9	TGAACTCTT	0	intergenic_variant	-	0	0
GAP43	33:19668491-19770509	Protein_coding	GAP43L14	23:6695657-6695672	7	15	TAGAAGTTACTTCAG	0	intron_variant	TRANK1	0	0
GAP43	33:19668491-19770509	Protein_coding	GAP43L15	23:8105158-8105173	1	15	AAAAAAGTCGGGAAG	0	downstream_gene_variant	SLC22A14	0	0
GAP43	33:19668491-19770509	Protein_coding	GAP43L16	26:6604456-6604456	1	na		0	intron_variant	VPS37B	0	0
GAP43	33:19668491-19770509	Protein_coding	GAP43L17	27:1096287-1096305	1	18	TTCTCCGTCGCTCCTCTT	na	intron_variant	SMUG1	0	0
GAP43	33:19668491-19770509	Protein_coding	GAP43L18	31:11840058-11840080	35	22	TTTCTCAGTTTGAGTACCTTTA	0	intergenic_variant	-	0	0
GAP43	33:19668491-19770509	Protein_coding	GAP43L2	1:105973582-105973598	2	16	TAAAAACACAAAGCCA	0	intron_variant	KLK4	0	0
GAP43	33:19668491-19770509	Protein_coding	GAP43L3	7:56532678-56532693	1	15	TGTGACAGTGTTTTT	0	intron_variant	CCDC178	0	0
GAP43	33:19668491-19770509	Protein_coding	GAP43L4	8:31386939-31386956	1	17	TGGAAGTATAAAATGTT	0	intron_variant	KTN1	0	0
GAP43	33:19668491-19770509	Protein_coding	GAP43L5	10:31704499-31704517	30	18	TTCTAATTTAATTATTTT	0	intron_variant	CRY1	0	0
GAP43	33:19668491-19770509	Protein_coding	GAP43L6	14:14158340-14158355	2	15	CCAAAAGAGCTTTTT	0	intron_variant	ADAM22	0	0
GAP43	33:19668491-19770509	Protein_coding	GAP43L7	17:34216568-34216583	2	15	TAAATATTTTTTTCA	0	intron_variant	MTA3	0	0
GAP43	33:19668491-19770509	Protein_coding	GAP43L8	20:1252085-1252099	1	14	CTAAAATATTTTGG	0	intron_variant,non_coding_transcript_variant	LOC111091218	0	0
GAP43	33:19668491-19770509	Protein_coding	GAP43L9	20:55305025-55305037	3	12	AAATTGGGACGG	na	intron_variant	SH3GL1	0	0
GAPDH	27:38468889-38472653	Protein_coding	GAPDHL1	38:22097487-22097504	1	17	CGTTTCTTTGTCTTTTG	0	intron_variant	PEA15	741	5
GAPDH	27:38468889-38472653	Protein_coding	GAPDHL10	16:30597847-30597863	1	16	CGACATTTTCACTTTA	na	upstream_gene_variant	LOC111090291	741	5
GAPDH	27:38468889-38472653	Protein_coding	GAPDHL11	16:5033274-5033290	1	16	AAAAACTGAAGTAAAA	0	intergenic_variant	-	741	5
GAPDH	27:38468889-38472653	Protein_coding	GAPDHL12	14:6526152-6526167	1	15	GTCATTAGTTTTCTC	0	intron_variant	CEP41	741	5
GAPDH	27:38468889-38472653	Protein_coding	GAPDHL13	12:68005090-68005106	2	16	GAAAAACTATAAGTAT	na	intergenic_variant	-	741	5
GAPDH	27:38468889-38472653	Protein_coding	GAPDHL14	12:26079004-26079025	32	21	TAAAAAAAAAAAACACTTTTG	0	intron_variant	KHDRBS2	741	5
GAPDH	27:38468889-38472653	Protein_coding	GAPDHL15	11:65878299-65878315	3	16	GAAACACTACATTTTT	0	intron_variant,non_coding_transcript_variant	-	741	5
GAPDH	27:38468889-38472653	Protein_coding	GAPDHL16	8:16800413-16800430	1	17	TAAATTTGTTTTTCTCC	0	intergenic_variant	-	741	5
GAPDH	27:38468889-38472653	Protein_coding	GAPDHL17	6:8180718-8180732	2	14	GGGGGGGGGGGGGA	0	intron_variant	CUX1	741	5
GAPDH	27:38468889-38472653	Protein_coding	GAPDHL18	3:82422570-82422587	1	17	ATCTGGAATATTTTTTC	0	intron_variant,non_coding_transcript_variant	-	741	5
GAPDH	27:38468889-38472653	Protein_coding	GAPDHL19	3:27633751-27633768	1	17	AAAGCATCCTGGTTTGC	0	intron_variant	JMY	741	5
GAPDH	27:38468889-38472653	Protein_coding	GAPDHL2	37:26135307-26135318	2	11	AAGAGGTGGAG	0	3_prime_UTR_variant	LOC111094369	741	5
GAPDH	27:38468889-38472653	Protein_coding	GAPDHL20	2:81461408-81461425	1	17	TCCCTTTTGGACTTTAA	0	downstream_gene_variant	FBXO42	741	5
GAPDH	27:38468889-38472653	Protein_coding	GAPDHL21	1:92848072-92848088	1	16	GAAAATCTAGTTTTTA	0	intergenic_variant	-	741	5
GAPDH	27:38468889-38472653	Protein_coding	GAPDHL3	35:20579883-20579899	1	16	ATGATTGAGTAATCTA	na	intron_variant	LOC102151579	741	5
GAPDH	27:38468889-38472653	Protein_coding	GAPDHL4	30:18799997-18800010	1	13	TCCTTCTGGCTTT	0	intergenic_variant	-	741	5
GAPDH	27:38468889-38472653	Protein_coding	GAPDHL5	30:10979780-10979795	2	15	AAAAACTTGGGGAAA	0	downstream_gene_variant	LOC111093393	741	5
GAPDH	27:38468889-38472653	Protein_coding	GAPDHL6	28:8462204-8462220	1	16	AAAGTTCTGGAAAGCT	na	intron_variant	PLCE1	741	5
GAPDH	27:38468889-38472653	Protein_coding	GAPDHL7	24:25579073-25579093	5	20	AAAAAAAATTTAAAAAACAA	0	intron_variant	SOGA1	741	5
GAPDH	27:38468889-38472653	Protein_coding	GAPDHL8	20:22912312-22912329	9	17	AAGAATGAACATGGGAA	0	intron_variant	TAFA4	741	5
GAPDH	27:38468889-38472653	Protein_coding	GAPDHL9	19:3470456-3470473	12	17	AAAGAAGATGTGGTACA	0	intergenic_variant	-	741	5
GAR1	32:29995710-30004545	Protein_coding	GAR1L1	28:30223298-30223318	1	20	TTTATGTGTGTTTCTTTTTA	na	intergenic_variant	-	18	0
GAR1	32:29995710-30004545	Protein_coding	GAR1L2	32:29711347-29711362	3	15	CAAAAGGATTGCATC	na	intron_variant	SEC24B	18	0
GATAD1	14:18043857-18054340	Protein_coding	GATAD1L1	19:10412101-10412101	1	na		na	intergenic_variant	-	13	0
GCAT	10:26821121-26827496	Protein_coding	GCATL1	14:39640848-39640864	2	16	AGGAATTTAAATTCTT	0	3_prime_UTR_variant	SNX10	2	0
GCSH	5:70745591-70757292	Protein_coding	GCSHL1	7:18091713-18091731	1	18	AGAAAGGAGGTTTGTGCT	na	intron_variant	NIBAN1	180	5
GGTA1	9:60985117-61042525	Protein_coding	GGTA1L1	12:42170095-42170111	8	16	GAAATGCTGACTTTTA	0	intron_variant,non_coding_transcript_variant	-	0	0
GHITM	4:32402210-32417905	Protein_coding	GHITML1	17:36228859-36228877	3	18	AAGGAAAATATAAATTGG	na	intron_variant	ANAPC1	23	0
GLO1	12:7584141-7609615	Protein_coding	GLO1L1	22:33354852-33354867	1	15	AACATTTAAATCATT	0	intergenic_variant	-	19	0
GLO1	12:7584141-7609615	Protein_coding	GLO1L2	25:47308121-47308136	1	15	CTCAACTGTGCACTT	0	upstream_gene_variant	-	19	0
GLO1	12:7584141-7609615	Protein_coding	GLO1L3	27:28390686-28390702	11	16	CCTACTAGTAAATTCT	1	intron_variant	PLCZ1	19	0
GLRX3	28:38724895-38755323	Protein_coding	GLRX3L1	X:33967251-33967268	3	17	CCCCTCTGCCTCCTTTG	1	intergenic_variant	-	12	1
GLT8D1	20:37093826-37103213	Protein_coding	GLT8D1L1	6:50462540-50462554	1	14	AAATTTAAAGGACA	na	intergenic_variant	-	1	0
GLUD1	4:34629046-34662711	Protein_coding	GLUD1L1	3:5248620-5248636	2	16	TCTTTCTGTTATCTTA	0	intron_variant,non_coding_transcript_variant	LOC102156725	9	1
GLUD1	4:34629046-34662711	Protein_coding	GLUD1L2	17:43213047-43213063	3	16	TAAAGGAAATAAAAAG	0	intergenic_variant	-	9	1
GLUD1	4:34629046-34662711	Protein_coding	GLUD1L3	35:26284460-26284466	2	6	GTTTTT	na	5_prime_UTR_variant	LOC102155956	9	1
GLUL	7:15730898-15740241	Protein_coding	GLULL1	4:19685397-19685407	2	10	TCCAATTTTA	0	upstream_gene_variant	DNA2	46	2
GLUL	7:15730898-15740241	Protein_coding	GLULL2	31:12612186-12612203	1	17	GGCTGTGGCAATTTCTT	0	intron_variant	USP25	46	2
GMDS	35:2108459-2519902	Protein_coding	GMDSL1	3:91667296-91667313	0	17	AAAATTAGAAACTGGAA	na	intron_variant	TMEM175	2	0
GMFB	8:30394020-30408408	Protein_coding	GMFBL1	6:68299040-68299055	1	15	TAAAATTATACACTG	0	intergenic_variant	-	9	0
GNAS	24:43643409-43658641	Protein_coding	GNASL1	5:33760401-33760415	3	14	ATAAATAAAATCTT	0	intron_variant	NTN1	1	0
GNB4	34:12818063-12849822	Protein_coding	GNB4L1	32:28853029-28853036	15	7	CAATGTG	0	intergenic_variant	-	2	0
GNPDA1	2:36938682-36949657	Protein_coding	GNPDA1L1	11:47593617-47593716	1	na		0	intergenic_variant	-	13	0
GNPDA2	13:41207192-41228570	Protein_coding	GNPDA2L1	1:583881-583935	1	na		na	intergenic_variant	-	6	0
GNPNAT1	8:28992173-29005511	Protein_coding	GNPNAT1L1	14:37589985-37589999	1	14	AAAAGATAAAAGGA	0	intergenic_variant	-	40	0
GOLGA5	8:1874716-1907251	Protein_coding	GOLGA5L1	19:26134674-26134693	1	19	ATGAGAAAGCGTTTTTTAA	na	intron_variant	CNTNAP5	0	0
GOLGA7	16:24083498-24102024	Protein_coding	GOLGA7L1	11:51415321-51415338	3	17	CAAGAATGGAATTTTTA	0	intron_variant,non_coding_transcript_variant	LOC111098086	34	0
GOLGA7	16:24083498-24102024	Protein_coding	GOLGA7L2	14:28953722-28953739	1	17	CTAAAGCTCTCAGTTTA	na	intron_variant	DGKB	34	0
GON7	8:62406682-62410476	Protein_coding	GON7L1	35:22157531-22157548	2	17	TCTTTTCACTAATTTTA	0	intergenic_variant	-	0	0
GOSR1	9:44478826-44537405	Protein_coding	GOSR1L1	11:57621311-57621326	1	15	AAAAACCCTCCACTA	na	intergenic_variant	-	0	0
GOSR1	9:44478826-44537405	Protein_coding	GOSR1L2	23:31063709-31063725	7	16	TCCCTATGTTCTTTTG	0	intergenic_variant	-	0	0
GOSR1	9:44478826-44537405	Protein_coding	GOSR1L3	24:33841746-33841768	4	22	AAATTAAAAATTGTTAATTATA	1	intron_variant	SLC13A3	0	0
GOSR1	9:44478826-44537405	Protein_coding	GOSR1L4	24:42095085-42095212	1	na		0	intron_variant,non_coding_transcript_variant	-	0	0
GOSR1	9:44478826-44537405	Protein_coding	GOSR1L5	29:3671973-3671978	3	5	GGGGG	0	intron_variant	PXDNL	0	0
GOT2	2:57968833-57994219	Protein_coding	GOT2L1	18:18231783-18231801	2	18	CAATTTGGGGATTTGAGA	0	intron_variant	MAGI2	27	0
GPBP1	2:44243833-44316498	Protein_coding	GPBP1L1	X:20794055-20794069	1	14	ATCTGTTTCTTGGT	1	intron_variant,non_coding_transcript_variant	LOC111094824	14	0
GPI	1:117922380-117948325	Protein_coding	GPIL1	9:14178518-14178536	1	18	TCTACTTGTTTCTTTTTA	na	intron_variant	CEP112	13	3
GPI	1:117922380-117948325	Protein_coding	GPIL2	32:29874945-29874958	1	13	TCTCTCTCTTTCA	0	intron_variant	MCUB	13	3
GPM6B	X:10214889-10260905	Protein_coding	GPM6BL1	16:34596310-34596323	3	13	AAAACTAGTTCTA	0	intergenic_variant	-	0	0
GPN3	26:8279100-8291584	Protein_coding	GPN3L1	32:17193562-17193562	1	na		na	intron_variant	HPGDS	6	0
GPX1	20:39889165-39890253	Protein_coding	GPX1L1	4:64233885-64233903	4	18	AAATGAAAATTGACACCA	1	intron_variant	PARP8	0	0
GPX2	8:39322040-39325833	Protein_coding	GPX2L1	26:27996046-27996051	1	5	CGGAG	na	intron_variant	SPECC1L	0	0
GRPEL2	4:59603384-59614491	Protein_coding	GRPEL2L1	31:7941669-7941681	2	12	TAGAAACTTATC	1	intron_variant	ROBO1	16	0
GRSF1	13:60088198-60102292	Protein_coding	GRSF1L1	32:15113889-15113907	2	18	TCAGTCTCCCTTATTGTA	0	intergenic_variant	-	4	0
GSKIP	8:65110659-65131205	Protein_coding	GSKIPL1	11:49270864-49270877	2	13	GATATCTACTTTA	0	upstream_gene_variant	-	0	0
GSR	16:33633949-33679592	Protein_coding	GSRL1	7:4049005-4049021	2	16	TGAATGGAACAGAGAC	0	downstream_gene_variant	LOC102152940	3	0
GSTK1	16:6411678-6416135	Protein_coding	GSTK1L1	8:42199990-42200003	3	13	TAAAATAAATTCA	1	intron_variant	RAD51B	4	0
GTF2A2	30:24502825-24522248	Protein_coding	GTF2A2L1	6:28535522-28535540	4	18	GAAATATCAGTGCTGTAG	0	intergenic_variant	-	32	2
GTF2A2	30:24502825-24522248	Protein_coding	GTF2A2L2	31:13632714-13632793	3	na		0	intron_variant,non_coding_transcript_variant	-	32	2
GTF2E1	33:24107650-24201654	Protein_coding	GTF2E1L1	1:66556421-66556441	124	20	CATAAATAAATAAATAAATA	3	intergenic_variant	-	2	0
GTF3A	25:12171058-12183491	Protein_coding	GTF3AL1	23:31279982-31279997	4	15	AAGGTTTTGGTTCTT	1	intron_variant	CEP63	2	0
GTF3C6	12:67491034-67505012	Protein_coding	GTF3C6L1	12:63890615-63890620	1	5	TTTTA	0	intron_variant	CRYBG1	10	0
GTPBP4	2:33936629-33955947	Protein_coding	GTPBP4L1	2:57902384-57902400	3	16	AAAAGACTGAAACTAG	na	intergenic_variant	-	27	0
GTPBP4	2:33936629-33955947	Protein_coding	GTPBP4L2	11:3485398-3485413	1	15	AAAAATGAAATCTTA	0	intergenic_variant	-	27	0
GTPBP4	2:33936629-33955947	Protein_coding	GTPBP4L3	X:77372738-77372753	3	15	TACCTCCTTTTTTTA	1	intergenic_variant	-	27	0
GUCY1A1	15:53172914-53236200	Protein_coding	GUCY1A1L1	1:25218446-25218460	1	14	AAGACCAGGTTTGA	0	intergenic_variant	-	0	0
GULP1	36:30108886-30248805	Protein_coding	GULP1L1	3:66789669-66789684	2	15	GAAAGATAGTCTGAG	0	intergenic_variant	-	2	0
H1-8	20:5614822-5619136	Protein_coding	H1-8L1	10:53652469-53652489	18	20	CTCTAAAATGATAAGTCTTA	3	intergenic_variant	-	13	0
H2AZ1	32:21889890-21892165	Protein_coding	H2AZ1L1	15:35275877-35275986	1	na		0	intron_variant	LOC102151430	67	0
HADHA	17:20307207-20355659	Protein_coding	HADHAL1	34:39045291-39045307	2	16	TTAATTATTATTTTTA	0	intron_variant	NAALADL2	11	0
HDAC1	2:68901339-68936399	Protein_coding	HDAC1L1	3:25514560-25514574	3	14	CAAATGCACATTGA	0	intron_variant,non_coding_transcript_variant	-	15	0
HDGFL3	3:54903955-54978853	Protein_coding	HDGFL3L1	X:64925788-64925804	2	16	TAAAATGTTCATACTA	na	intron_variant	RPS6KA6	0	0
HIBADH	14:40672294-40780608	Protein_coding	HIBADHL1	12:6938254-6938270	1	16	AAAAGAGGCTTGGAGA	0	intron_variant	ZFAND3	14	0
HIBADH	14:40672294-40780608	Protein_coding	HIBADHL2	X:123049841-123049858	20	17	TCTCCATATACATTTTA	0	intron_variant	FUNDC2	14	0
HIBCH	37:841385-943972	Protein_coding	HIBCHL1	2:39378744-39378762	49	18	CCCAAGAGAGTCTTTCTT	0	intergenic_variant	-	10	0
HIBCH	37:841385-943972	Protein_coding	HIBCHL2	38:15161943-15161960	1	17	AAAAGATTTTATTTTTA	0	intergenic_variant	-	10	0
HIGD1A	23:11893117-11903934	Protein_coding	HIGD1AL1	14:38060261-38060276	1	15	AGAAAGTTATAAATC	0	intergenic_variant	-	85	0
HIKESHI	21:13210356-13249594	Protein_coding	HIKESHIL1	X:111386698-111386714	6	16	TTAATATCCCTATATG	0	intergenic_variant	-	1	0
HINT1	11:19551057-19555390	Protein_coding	HINT1L1	3:54137642-54137658	2	16	AAAAAACATATGCAGA	na	intron_variant	PDE8A	37	1
HINT1	11:19551057-19555390	Protein_coding	HINT1L2	5:22310576-22310591	7	15	AAAAATCTGGTTTGG	0	intron_variant	ARHGAP20	37	1
HINT1	11:19551057-19555390	Protein_coding	HINT1L3	7:11144855-11144874	79	19	TCCCTAGAATTATTTTCTT	0	intron_variant	ANGEL2	37	1
HINT1	11:19551057-19555390	Protein_coding	HINT1L4	15:11413333-11413344	2	11	AAGAAAATAGA	na	intron_variant	AGBL4	37	1
HINT1	11:19551057-19555390	Protein_coding	HINT1L5	22:133810-133828	3	18	AATATTTGTTAACATTTA	na	intron_variant	NEK5	37	1
HINT1	11:19551057-19555390	Protein_coding	HINT1L6	37:20812366-20812444	1	na		0	intron_variant	SPAG16	37	1
HIPK3	18:34305208-34397593	Protein_coding	HIPK3L1	33:18138457-18138471	2	14	TGGACTTTTTTTTA	0	intron_variant	GRAMD1C	0	0
HMG20A	30:38839520-38916952	Protein_coding	HMG20AL1	32:784297-784336	1	39	TACATTTTCGTATAAACTATTCCTGGAAAAGTATATATT	0	downstream_gene_variant	SCARB2	1	0
HMG20A	30:38839520-38916952	Protein_coding	HMG20AL2	X:6170631-6170645	5	14	AGAAATTTTAATCC	0	intergenic_variant	-	1	0
HMGB1	25:9431223-9558165	Protein_coding	HMGB1L1	1:9693280-9693298	5	18	ATAAAAATGTACTTTTAG	0	intergenic_variant	-	315	13
HMGB1	25:9431223-9558165	Protein_coding	HMGB1L2	5:42759676-42759691	1	15	GAAAAGGAAACAGGG	0	intron_variant	MAP2K3	315	13
HMGB1	25:9431223-9558165	Protein_coding	HMGB1L3	13:17949810-17949824	2	14	TTGGCTCAGGTCTT	0	intron_variant,non_coding_transcript_variant	LOC102151302	315	13
HMGB1	25:9431223-9558165	Protein_coding	HMGB1L4	15:23736519-23736534	1	15	GTACCTATTTATCTC	na	intron_variant	PPFIA2	315	13
HMGB1	25:9431223-9558165	Protein_coding	HMGB1L5	21:34871459-34871478	5	19	AAAAAATGTCAGTGAGGGA	na	intergenic_variant	-	315	13
HMGB1	25:9431223-9558165	Protein_coding	HMGB1L6	26:4719250-4719268	6	18	TAATCTGTACTATTTTTT	0	intron_variant	TMEM132B	315	13
HMGB1	25:9431223-9558165	Protein_coding	HMGB1L7	29:26763184-26763202	11	18	GAACTTTTGGCAGTCCTT	1	intron_variant,non_coding_transcript_variant	LOC102155979	315	13
HMGB2	25:23939024-23941720	Protein_coding	HMGB2L1	12:7622165-7622177	8	12	AGAACTGAGCAG	0	intron_variant	DNAH8	81	0
HMGB3	X:119152166-119159803	Protein_coding	HMGB3L1	2:57573112-57573127	1	15	GGTGTCCAAGAATTT	na	intergenic_variant	-	162	1
HMGB3	X:119152166-119159803	Protein_coding	HMGB3L2	13:20451448-20451462	1	14	AAGGAGAAGATTTA	0	intergenic_variant	-	162	1
HMGN1	31:34275400-34282427	Protein_coding	HMGN1L1	5:31914625-31914643	1	18	TTCTGTCCCAGATCTTTG	0	intron_variant	ALOX15	123	12
HMGN1	31:34275400-34282427	Protein_coding	HMGN1L2	8:29164118-29164139	18	21	TTTGCATTTGTGTATTTTTGT	1	intergenic_variant	-	123	12
HMGN1	31:34275400-34282427	Protein_coding	HMGN1L3	20:19157487-19157504	13	17	CCTCAGACTTGTTTCTT	1	intron_variant	PPP4R2	123	12
HMGN3	12:40135984-40168281	Protein_coding	HMGN3L1	17:34499685-34499701	3	16	TCCACATTGCTTTTAT	0	intron_variant	SNRNP200	27	1
HMGN3	12:40135984-40168281	Protein_coding	HMGN3L2	21:14076782-14076838	2	na		0	intron_variant	DLG2	27	1
HMMR	4:47743576-47786982	Protein_coding	HMMRL1	11:44066166-44066183	2	17	CAGTTTATTTATTTTTA	0	intron_variant,non_coding_transcript_variant	-	3	1
HNRNPA3	36:20974541-20983972	Protein_coding	HNRNPA3L1	12:59663316-59663332	100	16	ATCAAAATGCAGTGAA	na	intron_variant	GRIK2	88	12
HNRNPA3	36:20974541-20983972	Protein_coding	HNRNPA3L2	19:28472533-28472549	2	16	CAGGATACTGCAATTA	na	intron_variant	TSN	88	12
HNRNPA3	36:20974541-20983972	Protein_coding	HNRNPA3L3	24:22547731-22547761	1	30	AATTAAAACTTTAAAAAAGAAGAAATCGGT	na	intron_variant	-	88	12
HNRNPA3	36:20974541-20983972	Protein_coding	HNRNPA3L4	28:8197292-8197307	239	15	AACATTCTTAGTTTA	na	upstream_gene_variant	-	88	12
HNRNPA3	36:20974541-20983972	Protein_coding	HNRNPA3L5	30:10269351-10269365	1	14	AAGATCTATTTCCC	na	intron_variant	TP53BP1	88	12
HNRNPA3	36:20974541-20983972	Protein_coding	HNRNPA3L6	30:23930947-23930968	94	21	TTTATTTTCACTTATATTCTT	na	upstream_gene_variant	RNF111	88	12
HNRNPA3	36:20974541-20983972	Protein_coding	HNRNPA3L7	32:15406930-15406946	49	16	TATCCTAACAATTTTA	na	intron_variant	GRID2	88	12
HNRNPA3	36:20974541-20983972	Protein_coding	HNRNPA3L8	32:32371373-32371391	1	18	AAAAGACAAACATTTTTT	na	splice_region_variant,intron_variant	ZGRF1	88	12
HNRNPC	15:18239810-18299065	Protein_coding	HNRNPCL1	9:42240483-42240498	3	15	TAAATTTTCAATTGA	na	intergenic_variant	-	25	1
HNRNPC	15:18239810-18299065	Protein_coding	HNRNPCL2	14:1647964-1647978	1	14	TAAAATACATTTTC	na	intron_variant,non_coding_transcript_variant	-	25	1
HNRNPC	15:18239810-18299065	Protein_coding	HNRNPCL3	26:9611082-9611098	1	16	AAGAGGTACAAACTGA	0	intron_variant	ERP29	25	1
HNRNPC	15:18239810-18299065	Protein_coding	HNRNPCL4	27:33774511-33774522	1	11	AATCTTTTCTT	na	intron_variant	DUSP16	25	1
HNRNPDL	32:6401266-6408006	Protein_coding	HNRNPDLL1	3:24402384-24402549	1	na		0	intron_variant	XRCC4	33	0
HNRNPDL	32:6401266-6408006	Protein_coding	HNRNPDLL2	9:10225734-10225752	1	18	CAGCTCATTTTCTTGATG	0	intergenic_variant	-	33	0
HNRNPDL	32:6401266-6408006	Protein_coding	HNRNPDLL3	14:5907201-5907215	2	14	TAGTAGTTGTTTTA	0	splice_region_variant,intron_variant,non_coding_transcript_variant	LOC111098724	33	0
HNRNPDL	32:6401266-6408006	Protein_coding	HNRNPDLL4	19:42873975-42873985	1	10	AATAGTTTTA	0	intron_variant	LRP1B	33	0
HNRNPDL	32:6401266-6408006	Protein_coding	HNRNPDLL5	24:32809486-32809503	1	17	AATACTCTGCAGTATTG	na	downstream_gene_variant	WFDC8	33	0
HNRNPDL	32:6401266-6408006	Protein_coding	HNRNPDLL6	29:29350978-29350998	2	20	AGAACAAACTCTGTAGATTT	0	intron_variant	LOC111093154	33	0
HNRNPDL	32:6401266-6408006	Protein_coding	HNRNPDLL7	30:28794558-28794576	2	18	TTAAACTTCATATTTCAT	0	intron_variant	CSNK1G1	33	0
HNRNPDL	32:6401266-6408006	Protein_coding	HNRNPDLL8	36:3300679-3300696	3	17	TAAAAAACATTACTTAG	na	intergenic_variant	-	33	0
HNRNPDL	32:6401266-6408006	Protein_coding	HNRNPDLL9	36:16696124-16696141	11	17	AAAGAAACCAAGAACAA	1	intergenic_variant	-	33	0
HNRNPH1	11:2050753-2059363	Protein_coding	HNRNPH1L1	35:7450672-7450672	1	na		na	intergenic_variant	-	33	0
HNRNPK	1:75499334-75511428	Protein_coding	HNRNPKL1	4:23723485-23723500	13	15	CCATGTAAGTTACTT	0	intron_variant	ECD	35	0
HNRNPK	1:75499334-75511428	Protein_coding	HNRNPKL2	18:36815998-36815998	1	na		0	intron_variant	MPPED2	35	0
HNRNPM	20:52993934-53034608	Protein_coding	HNRNPML1	11:40007891-40007904	3	13	AAGAAAAAAAATT	0	intron_variant	MLLT3	0	0
HNRNPR	2:76073553-76108763	Protein_coding	HNRNPRL1	22:45224122-45224138	7	16	AAAACAAACCCAGGCC	0	intron_variant	GPC6	8	0
HNRNPU	7:35832956-35842898	Protein_coding	HNRNPUL1	X:61078928-61078939	2	11	TTATCTTTTCA	0	intergenic_variant	-	0	0
HOMEZ	8:3545434-3558923	Protein_coding	HOMEZL1	1:27238674-27238688	8	14	TTCATTGAGCGATA	11	intergenic_variant	-	0	0
HOOK3	16:22791198-22940168	Protein_coding	HOOK3L1	4:41393065-41393065	1	na		0	intron_variant	KCNIP1	1	0
HSBP1	5:68474960-68479206	Protein_coding	HSBP1L1	19:37163264-37163275	2	11	TTCCAGTTTTT	0	intron_variant	MGAT5	47	4
HSDL2	11:66883021-66944844	Protein_coding	HSDL2L1	31:14927769-14927787	1	18	CACAAACATGGATAGTTT	na	intron_variant,non_coding_transcript_variant	-	6	1
HSP90AB1	12:12658415-12664945	Protein_coding	HSP90AB1L1	12:29449790-29449806	1	16	TAAGAATAAATGTTGG	na	intergenic_variant	-	25	0
HSP90AB1	12:12658415-12664945	Protein_coding	HSP90AB1L2	34:19116686-19116702	2	16	TAAAAAGTATAGAGGA	0	intergenic_variant	-	25	0
HSP90AB1	12:12658415-12664945	Protein_coding	HSP90AB1L3	X:72288006-72288024	44	18	CCATTTGAATTGTAAATT	0	intergenic_variant	-	25	0
HSPD1	37:7010421-7025912	Protein_coding	HSPD1L1	3:76974780-76974789	14	9	ATGCATTTA	0	intergenic_variant	-	72	0
HSPD1	37:7010421-7025912	Protein_coding	HSPD1L2	19:5797469-5797484	1	15	GTATATAGTTTCAGA	0	intergenic_variant	-	72	0
HSPD1	37:7010421-7025912	Protein_coding	HSPD1L3	25:49688332-49688343	1	11	GACTGAGGTGG	0	intergenic_variant	-	72	0
HSPD1	37:7010421-7025912	Protein_coding	HSPD1L4	28:27632304-27632319	4	15	CAGAGGAATGACCTT	0	upstream_gene_variant	VAX1	72	0
HSPH1	25:8972942-8998404	Protein_coding	HSPH1L1	37:12483992-12484003	1	11	GAAATCATCTG	0	intergenic_variant	-	2	0
HYPK	30:10541713-10544572	Protein_coding	HYPKL1	16:36373719-36373729	1	10	ATTAAAACTG	0	intron_variant,non_coding_transcript_variant	LOC111090318	15	0
HYPK	30:10541713-10544572	Protein_coding	HYPKL2	22:45979559-45979574	3	15	AAGATTTTATTTATT	0	intron_variant	ABCC4	15	0
ICA1	14:23673739-23816494	Protein_coding	ICA1L1	1:116169484-116169484	1	na		0	intron_variant,non_coding_transcript_variant	LOC102152738	0	0
IDH1	37:16512027-16530470	Protein_coding	IDH1L1	11:20080620-20089067	1	na		0	intron_variant	FNIP1	18	0
IDH1	37:16512027-16530470	Protein_coding	IDH1L2	12:67608117-67608131	3	14	CCATACCTTTTTTA	na	upstream_gene_variant	SLC16A10	18	0
IDH2	3:53070462-53077566	Protein_coding	IDH2L1	13:27040972-27040972	1	na		0	intron_variant	CYRIB	3	0
IDH3B	24:18556437-18561342	Protein_coding	IDH3BL1	16:15831269-15831284	1	15	TGCAACATAATTTTT	na	intergenic_variant	-	3	0
IDI1	2:33927759-33930651	Protein_coding	IDI1L1	22:41020205-41020222	50	17	AGCTGAAGGCAGATCTT	0	intergenic_variant	-	35	0
IER3IP1	7:44309459-44326253	Protein_coding	IER3IP1L1	27:40321106-40321122	1	16	AAAAAGACATTACAGG	0	intron_variant	RAD51AP1	5	0
IFRD1	14:52053423-52078419	Protein_coding	IFRD1L1	36:14230212-14230228	3	16	ATAAATAATCTCCATG	0	intron_variant	BBS5	2	0
IGBP1	X:54558515-54612029	Protein_coding	IGBP1L1	28:29053405-29053405	1	na		0	intron_variant	CACUL1	36	0
IGF2BP1	9:25199287-25240693	Protein_coding	IGF2BP1L1	14:9377012-9377023	0	11	AAAAAATTTGC	na	intron_variant	GRM8	1	0
IGF2BP2	34:18368509-18522232	Protein_coding	IGF2BP2L1	12:41819702-41819702	4	na		na	intron_variant,non_coding_transcript_variant	-	11	0
IGFBP2	37:23553227-23569321	Protein_coding	IGFBP2L1	21:21009297-21009297	1	na		0	intron_variant	RSF1	0	0
IKZF5	28:32547300-32564471	Protein_coding	IKZF5L1	2:65226127-65226144	1	17	CTGGTGTAAACTTTCTT	0	intergenic_variant	-	4	0
ILF3	20:50511915-50544234	Protein_coding	ILF3L1	27:17021434-17021444	1	10	GTATTTCATT	na	intron_variant,non_coding_transcript_variant	-	2	0
IMMP1L	18:35880278-35963128	Protein_coding	IMMP1LL1	3:64459225-64459233	4	8	CAAAGATC	0	intron_variant,non_coding_transcript_variant	-	45	2
IMMT	17:38927508-38964522	Protein_coding	IMMTL1	24:20890639-20890653	1	14	TAAAAAGACAAGTT	na	downstream_gene_variant	LOC111092230	3	0
IMPACT	7:63947117-63976628	Protein_coding	IMPACTL1	16:42365265-42365276	1	11	AAAAAATTAGC	1	intergenic_variant	-	7	0
INA	28:15670919-15685080	Protein_coding	INAL1	6:48613379-48613392	1	13	AAAATGGTTTTTA	na	intergenic_variant	-	10	0
ING5	25:51535521-51556264	Protein_coding	ING5L1	35:10841689-10841706	1	17	GTTTGTTTGTATTTTTA	0	intergenic_variant	-	1	0
INIP	11:67137101-67154443	Protein_coding	INIPL1	5:63354009-63354023	8	14	AAGAGTTTGAACTG	0	intergenic_variant	-	8	0
INIP	11:67137101-67154443	Protein_coding	INIPL2	26:10402158-10402164	1	6	AGAGAG	0	upstream_gene_variant	OAS3	8	0
INTS14	30:29921353-29956473	Protein_coding	INTS14L1	26:16943428-16943728	1	na		0	upstream_gene_variant	-	0	0
INTS14	30:29921353-29956473	Protein_coding	INTS14L2	26:18994965-18994978	1	13	AAAGGCACTACTG	0	intron_variant	SGSM1	0	0
INTS2	9:34749898-34801591	Protein_coding	INTS2L1	X:66950444-66950461	1	17	CATTAATTTGAATTCTA	0	intron_variant	DACH2	0	0
INTS6	22:549221-636810	Protein_coding	INTS6L1	33:30256827-30256844	5	17	TAAGAAGAGTCTACATA	0	upstream_gene_variant	DLG1	3	0
IQCB1	33:25046975-25112652	Protein_coding	IQCB1L1	18:5063113-5063116	2	3	AAT	0	intergenic_variant	-	5	0
IRAK2	20:8133987-8197008	Protein_coding	IRAK2L1	8:73746772-73746772	1	na		0	intron_variant	-	0	0
ISOC1	11:18011330-18029330	Protein_coding	ISOC1L1	23:37414635-37414651	4	16	TAAAACATTCTCAGGA	0	intron_variant	RASA2	4	0
ISOC2	1:102246881-102253726	Protein_coding	ISOC2L1	18:55444813-55444827	4	14	TCTCATCACTTTTT	0	downstream_gene_variant	LOC111091018	1	1
CRPPA	14:30697060-30989423	Protein_coding	CRPPAL1	38:10744207-10744224	1	17	AAGAATACTCTGTGGTT	na	intergenic_variant	-	0	0
ITCH	24:23476619-23630574	Protein_coding	ITCHL1	X:61632036-61632051	3	15	GGTATCAGTGTTTTA	na	intergenic_variant	-	3	0
ITSN1	31:29144754-29360134	Protein_coding	ITSN1L1	31:6637771-6637787	46	16	TGTGCAGAAGCTTTTT	0	intergenic_variant	-	0	0
JPT2	6:39181488-39201903	Protein_coding	JPT2L1	34:16785595-16785611	3	16	AAGAATTACAAGTGGG	0	intron_variant	PARL	0	0
KAT7	9:25841916-25875245	Protein_coding	KAT7L1	10:44869757-44869858	1	na		0	intergenic_variant	-	10	1
KAT7	9:25841916-25875245	Protein_coding	KAT7L2	13:49201524-49201539	7	15	TCACTATGTATTATT	0	intron_variant	IGFBP7	10	1
KAT7	9:25841916-25875245	Protein_coding	KAT7L3	17:59355979-59355979	1	na		0	intron_variant	VPS45	10	1
KAT7	9:25841916-25875245	Protein_coding	KAT7L4	22:60758702-60758720	7	18	TAAAAAAACGATGGTTGT	0	intron_variant	DCUN1D2	10	1
KCTD5	6:38403024-38426158	Protein_coding	KCTD5L1	33:18420307-18420383	1	na		na	intergenic_variant	-	14	1
KHDC3L	12:35434123-35435679	Protein_coding	KHDC3LL1	15:10332887-10332887	2	na		0	intron_variant	FAF1	5	0
KHDC3L	12:35434123-35435679	Protein_coding	KHDC3LL2	15:60953162-60953171	3	9	AAAAAAAAA	0	intergenic_variant	-	5	0
KHDC3L	12:35434123-35435679	Protein_coding	KHDC3LL3	22:4609570-4609570	2	na		0	intron_variant	LRCH1	5	0
KHDRBS1	2:69108822-69148067	Protein_coding	KHDRBS1L1	4:25437586-25437604	1	18	AGAAAATATTCTCATCTG	0	intron_variant,non_coding_transcript_variant	LOC111095497	2	0
KIF15	20:43454025-43532361	Protein_coding	KIF15L1	15:54074553-54074553	1	na		0	intergenic_variant	-	0	0
KIF23	30:33313029-33337663	Protein_coding	KIF23L1	2:29567205-29567205	1	na		na	intergenic_variant	-	0	0
KIF23	30:33313029-33337663	Protein_coding	KIF23L2	28:11872118-11872118	1	na		0	intron_variant	HPSE2	0	0
KIF2A	2:48642961-48714025	Protein_coding	KIF2AL1	34:41862624-41862640	5	16	TACACTTGGTTTTTTA	0	intergenic_variant	-	27	0
KLC3	1:110190252-110194950	Protein_coding	KLC3L1	X:38754175-38754189	3	14	CATTTCAAACTTTA	0	intron_variant	KDM6A	0	0
KLHDC3	12:11542449-11549012	Protein_coding	KLHDC3L1	8:7372771-7372771	1	na		0	intron_variant,non_coding_transcript_variant	LOC111096974	0	0
KNOP1	6:25564625-25584162	Protein_coding	KNOP1L1	2:30275972-30275987	2	15	TAAAGTGATGCAATC	0	intron_variant	ASB13	13	2
KNOP1	6:25564625-25584162	Protein_coding	KNOP1L2	3:42574562-42574578	14	16	AGATGTAGCAGTCTTA	0	intergenic_variant	-	13	2
KNOP1	6:25564625-25584162	Protein_coding	KNOP1L3	3:80173953-80173969	1	16	GGTATTTTTATTTTTT	na	intron_variant	PCDH7	13	2
KNOP1	6:25564625-25584162	Protein_coding	KNOP1L4	9:35084583-35084602	2	19	TCATATAGGAAAACATATT	0	downstream_gene_variant	-	13	2
KNOP1	6:25564625-25584162	Protein_coding	KNOP1L5	12:65163039-65163055	3	16	AAATTAGTGGGCTCTT	0	intron_variant,non_coding_transcript_variant	LOC111098383	13	2
KNOP1	6:25564625-25584162	Protein_coding	KNOP1L6	30:28790106-28790123	2	17	TAAAAATAACTAAATAA	0	intron_variant	CSNK1G1	13	2
KNSTRN	30:7562738-7573514	Protein_coding	KNSTRNL1	11:66534565-66534580	1	15	TAAATAAAATCTTGG	0	intron_variant	SUSD1	9	0
KNSTRN	30:7562738-7573514	Protein_coding	KNSTRNL2	33:14643750-14643759	2	9	TTTTTTTTT	3	intron_variant,non_coding_transcript_variant	-	9	0
KPTN	1:108535140-108544405	Protein_coding	KPTNL1	5:46398648-46398655	1	7	TTCGACC	0	intron_variant	ROR1	0	0
KRR1	10:15977575-15992392	Protein_coding	KRR1L1	26:6486430-6486442	1	12	AAAACAACCGGA	na	intron_variant	PITPNM2	12	1
KRT18	27:2189269-2193368	Protein_coding	KRT18L1	13:24630300-24630315	1	15	CCTGACCTTTTCTTT	0	intergenic_variant	-	320	0
KRT19	9:21240778-21245039	Protein_coding	KRT19L1	13:48457039-48457054	5	15	TTGTCTTTGATTTTT	0	intron_variant	-	33	0
LACTB2	29:19723155-19749147	Protein_coding	LACTB2L1	10:42471327-42471327	1	na		0	intergenic_variant	-	1	0
LACTB2	29:19723155-19749147	Protein_coding	LACTB2L2	19:21879035-21879050	1	15	TAAAACAGCATGGCA	0	intergenic_variant	-	1	0
LAPTM4B	13:41134-127399	Protein_coding	LAPTM4BL1	2:10533412-10533585	1	na		0	intron_variant	PIP4K2A	15	0
LAPTM4B	13:41134-127399	Protein_coding	LAPTM4BL2	4:68621421-68621439	19	18	TAAATAAATACTTGTTGA	5	intron_variant	TTC33	15	0
LAPTM4B	13:41134-127399	Protein_coding	LAPTM4BL3	21:21739489-21739504	1	15	CTTTCCTGCTTTTTT	na	intron_variant	ACER3	15	0
LAPTM4B	13:41134-127399	Protein_coding	LAPTM4BL4	X:108227821-108227834	3	13	CTGAGACTTTTCT	na	intergenic_variant	-	15	0
LARP7	32:32421648-32439431	Protein_coding	LARP7L1	4:69819366-69819383	2	17	TAAAGCTAAGCCTCCTG	0	intron_variant	FYB1	2	0
LARP7	32:32421648-32439431	Protein_coding	LARP7L2	5:25652320-25652331	2	11	GGTATTTCTTT	na	intron_variant	GUCY1A2	2	0
LARP7	32:32421648-32439431	Protein_coding	LARP7L3	29:29406985-29407000	3	15	GCATATTTGCTTTTT	na	intron_variant	LOC111093154	2	0
LDHA	21:40829844-40840947	Protein_coding	LDHAL1	6:28363098-28363112	1	14	TAAAATAAATACAG	0	intergenic_variant	-	230	8
LDHA	21:40829844-40840947	Protein_coding	LDHAL2	16:24169951-24169966	3	15	ACTTCTAGTTCTTTT	na	intergenic_variant	-	230	8
LGALS3	8:30977438-30994705	Protein_coding	LGALS3L1	38:4896334-4896350	5	16	CAAAAGGTAATAGATT	0	intergenic_variant	-	6	1
LIMS1	10:35192582-35339100	Protein_coding	LIMS1L1	14:45356508-45356527	2	19	CTCAACAAAGATGTTTTAT	0	intron_variant	BBS9	1	0
LLPH	10:8631891-8638922	Protein_coding	LLPHL1	10:7258385-7258401	3	16	CTGTCTCCTCTTTTCT	na	intron_variant	RASSF3	1	0
LOC100682992	29:36464870-36466666	lncRNA	LOC100682992L1	29:10235487-10235503	1	16	AAATGAGATGGTTTTC	0	intron_variant,non_coding_transcript_variant	-	na	0
LOC100683303	29:16461969-16465232	lncRNA	LOC100683303L1	X:106961049-106961065	70	16	TGAATTTGACTTTTTA	0	downstream_gene_variant	U6	na	0
LOC100683646	X:122566522-122567799	Protein_coding	LOC100683646L1	21:8580596-8580612	1	16	AACTTGTTGAATCTTT	na	intergenic_variant	-	na	0
LOC100684741	12:1305188-1307196	lncRNA	LOC100684741L1	6:1090479-1090495	1	16	ACTCTTCTGAGTTCTT	na	intron_variant	RABGEF1	na	0
LOC100684741	12:1305188-1307196	lncRNA	LOC100684741L2	11:35546838-35546856	20	18	TGCTAATTTCCTGATTTA	0	intron_variant	TTC39B	na	0
LOC100684741	12:1305188-1307196	lncRNA	LOC100684741L3	17:29559888-29559902	6	14	AGGTCTGCATTTCT	0	intron_variant	-	na	0
LOC100684741	12:1305188-1307196	lncRNA	LOC100684741L4	19:37868734-37868734	1	na		0	intron_variant	RAB3GAP1	na	0
LOC100684741	12:1305188-1307196	lncRNA	LOC100684741L5	30:15416894-15416897	1	3	GCC	0	intron_variant	GALK2	na	0
LOC100685822	2:77211660-77216291	Protein_coding	LOC100685822L1	13:54281046-54281062	16	16	TAAAAAGCTCTCAACA	0	intergenic_variant	-	na	0
LOC100685930	X:47936063-47986800	Protein_coding	LOC100685930L1	15:44698008-44698023	4	15	GTCTGGAAGCCTCTT	0	downstream_gene_variant	-	0	0
LOC100686073	2:59603021-59604173	Protein_coding	LOC100686073L1	8:13531138-13531154	8	16	TAAAGTCTAATTGTTG	0	intergenic_variant	-	3	0
LOC100688055	12:45680080-45682107	lncRNA	LOC100688055L1	27:35987898-35987914	17	16	ACTAAAAGGAAGGCTA	0	3_prime_UTR_variant	LOC106557878	na	0
LOC100688778	X:42409457-42417783	Protein_coding	LOC100688778L1	6:18820062-18820132	1	na		0	intron_variant	GSG1L	na	0
LOC100688778	X:42409457-42417783	Protein_coding	LOC100688778L2	18:10097812-10097829	1	17	AAAAAAGATAGGCTTAG	0	intergenic_variant	-	na	0
LOC100856041	5:29223682-29284076	lncRNA	LOC100856041L1	5:85268943-85268943	1	na		0	intron_variant,non_coding_transcript_variant	LOC106558851	na	0
LOC100856280	27:37114192-37167519	Protein_coding	LOC100856280L1	1:70894260-70894260	1	na		0	intron_variant	ERCC6L2	na	0
LOC100856280	27:37114192-37167519	Protein_coding	LOC100856280L2	4:15685864-15685880	1	16	CAATTGTTTGTTTTTC	na	intron_variant,non_coding_transcript_variant	-	na	0
LOC100856280	27:37114192-37167519	Protein_coding	LOC100856280L3	16:53773428-53773446	1	18	TGTGTATTTGTCCTTCTT	0	intron_variant	GPM6A	na	0
LOC100856405	27:5333706-5340363	Protein_coding	LOC100856405L1	10:46487536-46487552	5	16	GAGTTTGTTCACATTT	0	intergenic_variant	-	11	0
LOC100856405	27:5333706-5340363	Protein_coding	LOC100856405L2	12:56927152-56927167	2	15	AAGAAGGAAGGTGCT	na	intergenic_variant	-	11	0
LOC100856405	27:5333706-5340363	Protein_coding	LOC100856405L3	24:25769771-25769787	1	16	GTGTCCCAGACTTCTT	na	intron_variant	MROH8	11	0
LOC100856405	27:5333706-5340363	Protein_coding	LOC100856405L4	38:13013636-13013654	1	18	ATGAAAATGGGAAAAGAG	0	intron_variant	SPATA17	11	0
LOC102151412	1:104456015-104475552	Protein_coding	LOC102151412L1	22:18648504-18648522	2	18	GAAATATTTTTTCTGAAA	0	downstream_gene_variant	-	na	0
LOC102151412	1:104456015-104475552	Protein_coding	LOC102151412L2	27:14121869-14121885	3	16	AAGGAGTGGTATTCCA	0	intron_variant	ABCD2	na	0
LOC102151514	19:31716948-31734342	lncRNA	LOC102151514L1	24:39311216-39311231	1	15	AAAGTTCAACAATGG	0	intron_variant	TSHZ2	na	0
LOC102152359	5:67949974-67957193	lncRNA	LOC102152359L1	12:29768869-29768876	4	7	GACATTG	0	intergenic_variant	-	na	0
LOC102152918	2:65896044-65974449	lncRNA	LOC102152918L1	13:2968683-2968683	4	na		0	3_prime_UTR_variant	ZNF706	na	0
LOC102152993	8:35571488-35640448	lncRNA	LOC102152993L1	X:74364958-74364958	4	na		0	intergenic_variant	-	na	0
LOC102153599	18:17721394-17738985	Protein_coding	LOC102153599L1	3:82367679-82367679	1	na		0	intron_variant,non_coding_transcript_variant	-	na	0
LOC102153599	18:17721394-17738985	Protein_coding	LOC102153599L2	26:34821775-34821775	1	na		1	intergenic_variant	-	na	0
LOC102153942	X:24518137-24530007	Protein_coding	LOC102153942L1	X:22086963-22087083	3	na		na	upstream_gene_variant	-	na	0
LOC102154096	32:6842904-6852026	lncRNA	LOC102154096L1	27:15988845-15989044	43	na		5	intergenic_variant	-	na	0
LOC102154281	12:53096689-53110159	lncRNA	LOC102154281L1	32:6728467-6728483	37	16	ACAAAACTCCAGAATC	0	intron_variant	SCD5	na	0
LOC102154738	5:70233549-70240949	lncRNA	LOC102154738L1	2:68306292-68306308	1	16	CATCGCAGCTCTATTA	0	intron_variant	AZIN2	na	0
LOC102155107	4:56779225-56925441	lncRNA	LOC102155107L1	31:30814342-30814356	2	14	AAGAAGCAGATAGA	0	intergenic_variant	-	na	0
LOC102155584	4:38885373-38887922	lncRNA	LOC102155584L1	2:7966981-7966997	11	16	GTCAGTTCTAGTTTAT	0	downstream_gene_variant	GPR158	na	0
LOC102155584	4:38885373-38887922	lncRNA	LOC102155584L2	30:5987634-5987646	2	12	ATTTAGATCCAG	0	intergenic_variant	-	na	0
LOC102156205	19:29380585-29386202	lncRNA	LOC102156205L1	12:4786756-4786771	1	15	AAAACAAACTTCAAG	na	intron_variant	FKBP5	na	0
LOC102156537	20:33780047-33783999	lncRNA	LOC102156537L1	2:24287492-24287508	9	16	GGAAATGCATATTAAA	0	intron_variant	SEC61A2	na	0
LOC102156599	3:47223677-47286372	lncRNA	LOC102156599L1	38:21811359-21811359	2	na		0	intron_variant	NCSTN	na	0
LOC106558478	3:245256-248661	lncRNA	LOC106558478L1	X:74407215-74407233	63	18	TCAGAGAGTGCATTTGTT	0	intergenic_variant	-	na	0
LOC106558651	3:91744693-91745243	lncRNA	LOC106558651L1	33:3689637-3689654	1	17	CAATTCTCTGATGTCTT	0	intron_variant,non_coding_transcript_variant	-	na	0
LOC106559644	13:44659997-44679208	lncRNA	LOC106559644L1	32:27995234-27995234	1	na		0	intron_variant,non_coding_transcript_variant	LOC111093649	na	0
LOC106559647	1:103815398-103836892	Protein_coding	LOC106559647L1	4:6956712-6956728	1	16	ACAAAGTAGAAGAGGC	0	intron_variant,non_coding_transcript_variant	-	na	0
LOC111090178	16:41749454-41752838	lncRNA	LOC111090178L1	24:30423244-30423261	0	17	TAAAAAAAAATGAGTCC	na	intron_variant	PTPRT	na	0
LOC111092404	25:11997020-11998742	Protein_coding	LOC111092404L1	30:16586781-16586795	8	14	CAATAATATTTTTT	na	intergenic_variant	-	0	0
LOC111092520	26:4158751-4183118	lncRNA	LOC111092520L1	1:116079034-116079049	3	15	TCTGGCTTCCTTTTC	0	intron_variant	ZFP82	na	0
LOC111093524	31:20974380-21051965	lncRNA	LOC111093524L1	9:53490304-53490320	1	16	AAAGCATGGATCCGGG	0	intron_variant	HMCN2	na	0
LOC111093824	34:30468672-30572510	lncRNA	LOC111093824L1	4:73323363-73323379	3	16	AAAAACAAGTATTTTT	na	intron_variant	AGXT2	na	0
LOC111094952	X:91816291-91838953	Protein_coding	LOC111094952L1	3:67013820-67013820	1	na		na	intron_variant,non_coding_transcript_variant	-	na	0
LOC111097575	10:437459-438753	lncRNA	LOC111097575L1	6:55528829-55528845	2	16	GGTTACACTATAATTT	0	downstream_gene_variant	BCAR3	0	0
LOC111097575	10:437459-438753	lncRNA	LOC111097575L2	8:44056703-44056719	2	16	AAGAGTAGGGGCTCCA	0	intron_variant	SYNJ2BP	0	0
LOC111098057	11:36490956-36499449	lncRNA	LOC111098057L1	5:27645874-27645875	2	1	G	0	intergenic_variant	-	na	0
LOC111098057	11:36490956-36499449	lncRNA	LOC111098057L2	11:34053244-34053261	22	17	TAAGGCTAATGACTTGC	0	intron_variant,non_coding_transcript_variant	-	na	0
LOC111098057	11:36490956-36499449	lncRNA	LOC111098057L3	22:4500976-4500990	7	14	TAAAGCAAATGGAA	0	intron_variant	HTR2A	na	0
LOC111098057	11:36490956-36499449	lncRNA	LOC111098057L4	26:25826742-25826742	1	na		0	intron_variant	-	na	0
LOC111098057	11:36490956-36499449	lncRNA	LOC111098057L5	X:44908313-44908328	5	15	CATTCCTTGGCATTT	0	intron_variant	IQSEC2	na	0
LOC111098614	13:45476481-45479196	lncRNA	LOC111098614L1	3:80777083-80777098	4	15	CAAACTCATATTGTG	0	intergenic_variant	-	na	0
LOC111098614	13:45476481-45479196	lncRNA	LOC111098614L2	13:15707962-15707981	65	19	AAAAGAATCCAGAAGAGAT	1	intergenic_variant	-	na	0
LOC474791	11:60715223-60729186	Protein_coding	LOC474791L1	31:1984451-1984465	14	14	CAAATCTACTTTTG	0	intron_variant	CADM2	8	0
LOC475916	9:4805655-4808076	Protein_coding	LOC475916L1	1:108228077-108228091	1	14	GACCTTAGGTTTTC	na	intron_variant,non_coding_transcript_variant	-	105	0
LOC475916	9:4805655-4808076	Protein_coding	LOC475916L2	4:61640710-61640726	1	16	GAAAACAAGCATTTCT	0	intron_variant	NDUFS4	105	0
LOC475916	9:4805655-4808076	Protein_coding	LOC475916L3	13:49468981-49468994	1	13	TATTTCTTCTTTA	0	downstream_gene_variant	U6	105	0
LOC476206	1:25836409-25839148	Protein_coding	LOC476206L1	13:52363426-52363437	1	11	AAATACACTCT	0	upstream_gene_variant	-	251	0
LOC476206	1:25836409-25839148	Protein_coding	LOC476206L2	37:28519756-28519775	8	19	AGAAAAAATAGAAAAATGA	0	downstream_gene_variant	LOC111094399	251	0
LOC477508	26:16346760-16349042	Protein_coding	LOC477508L1	27:1755458-1755458	1	na		0	intron_variant	-	15	0
LOC478720	35:10454501-10462296	Protein_coding	LOC478720L1	5:85980339-85980354	3	15	CAAAGATGAATAGAG	na	intergenic_variant	-	15	0
LOC478720	35:10454501-10462296	Protein_coding	LOC478720L2	11:26893461-26893479	227	18	CAAAGAAGTCAAACTCTC	8	intron_variant	MLANA	15	0
LOC478720	35:10454501-10462296	Protein_coding	LOC478720L3	27:30314774-30314790	6	16	ATAGGATTCCATACCA	0	intron_variant,non_coding_transcript_variant	-	15	0
LOC478720	35:10454501-10462296	Protein_coding	LOC478720L4	29:13805579-13805596	1	17	GAAGCTATATCTTTTTA	0	intron_variant,non_coding_transcript_variant	-	15	0
LOC479815	6:23627782-23653625	Protein_coding	LOC479815L1	11:28439427-28439442	1	15	TGGACAAATAATCTA	0	intergenic_variant	-	15	0
LOC479815	6:23627782-23653625	Protein_coding	LOC479815L2	14:14297234-14297248	9	14	TTACCATCCTTTTA	0	intergenic_variant	-	15	0
LOC479815	6:23627782-23653625	Protein_coding	LOC479815L3	25:26641410-26641425	14	15	TAAAAATAAAAAATC	1	intergenic_variant	-	15	0
LOC479901	6:40613504-40626068	Protein_coding	LOC479901L1	32:26587696-26587712	52	16	TGAAAGTTTTCTTTTA	0	intron_variant	GSTCD	0	0
LOC479912	6:42201697-42207886	Protein_coding	LOC479912L1	20:14194521-14194536	150	15	ACAAGTATTTTTCTT	16	intron_variant,non_coding_transcript_variant	-	39	0
LOC480934	X:46502459-46510990	Protein_coding	LOC480934L1	32:1292581-1292596	2	15	TAAGCCCCCTTATTT	0	intron_variant	SHROOM3	1	0
LOC481650	11:60746428-60758009	Protein_coding	LOC481650L1	31:1984452-1984465	14	13	AAATCTACTTTTG	0	intron_variant	CADM2	8	0
LOC484356	1:106044100-106050204	Protein_coding	LOC484356L1	21:7272401-7272401	1	na		na	intron_variant	DEUP1	na	0
LOC484356	1:106044100-106050204	Protein_coding	LOC484356L2	X:38426928-38426943	3	15	GGATTCTTTGATGTT	0	intergenic_variant	-	na	0
LOC486776	28:1767224-1800922	Protein_coding	LOC486776L1	5:47198965-47198980	3	15	AACAGAAGAGTTCCT	na	intron_variant	ATG4C	4	0
LOC486776	28:1767224-1800922	Protein_coding	LOC486776L2	7:23682997-23683015	26	18	GGACATATTCTTTTCTTT	0	intron_variant,non_coding_transcript_variant	-	4	0
LOC486776	28:1767224-1800922	Protein_coding	LOC486776L3	12:61426267-61426285	9	18	CTAAAAATCCATGATCAG	0	intergenic_variant	-	4	0
LOC487290	2:65305210-65356776	Protein_coding	LOC487290L1	15:41787269-41787285	3	16	TCCTTATTTGTTTTTT	na	downstream_gene_variant	-	na	0
LOC606856	25:309450-473813	Protein_coding	LOC606856L1	19:49257759-49257825	1	na		0	upstream_gene_variant	LOC111091081	0	0
LOC607049	2:35758981-35761529	Protein_coding	LOC607049L1	7:43758499-43758514	6	15	AAAACTAAAAAAAAA	0	intron_variant	SMAD2	0	0
LOC608308	17:21545586-21564681	Protein_coding	LOC608308L1	32:28465101-28465117	1	16	TCCATTACAGACTTTT	0	intron_variant	HADH	6	0
LOC608455	20:40507767-40515854	Protein_coding	LOC608455L1	3:54095285-54095300	2	15	AGATGAAGAACTGGA	0	intron_variant	ZNF592	2	0
LOC610012	2:71914693-71917976	lncRNA	LOC610012L1	12:7199651-7199665	3	14	TATAACCACAATTT	na	intron_variant	BTBD9	na	0
LOC610091	22:18330257-18365788	lncRNA	LOC610091L1	19:11826743-11826757	3	14	AATATAGCAATTCA	na	intergenic_variant	-	na	0
LOC610091	22:18330257-18365788	lncRNA	LOC610091L2	X:13374421-13374437	3	16	AATAAATAAAATCTTA	na	intron_variant,non_coding_transcript_variant	-	na	0
LOC610164	31:31316573-31321413	Protein_coding	LOC610164L1	24:23423989-23424000	5	11	TAAGACCTTTA	0	intron_variant	-	1	0
LOC610304	12:20404178-20423639	Protein_coding	LOC610304L1	13:40913379-40913395	1	16	CCAAAGTGAGTATTTT	na	intron_variant	KCTD8	7	0
LOC610615	26:6120500-6190147	Protein_coding	LOC610615L1	31:38476091-38476107	2	16	AAACATTCAGGCACGA	0	intron_variant	-	2	0
LPCAT3	27:38028438-38068854	Protein_coding	LPCAT3L1	2:74108129-74108129	1	na		na	intron_variant	AUNIP	1	0
LRR1	8:26229293-26241617	Protein_coding	LRR1L1	2:1051307-1051323	1	16	ACAGTCCTCATTTTTA	0	intron_variant,non_coding_transcript_variant	-	0	0
LRRC40	6:75515694-75564765	Protein_coding	LRRC40L1	4:64503488-64503488	1	na		na	intergenic_variant	-	0	0
LRRC41	15:14092739-14111034	Protein_coding	LRRC41L1	9:17672963-17672980	1	17	TAAAAATATTTTAGAGT	na	intron_variant,non_coding_transcript_variant	-	0	0
LRRC49	30:34580906-34737181	Protein_coding	LRRC49L1	17:50434030-50434046	2	16	TACCAGTTCTTTTTAA	0	intron_variant	EXOC6B	0	0
LSM12	9:19306421-19328278	Protein_coding	LSM12L1	29:199004-199017	2	13	AAAGGAAATAAGA	1	intron_variant	PRKDC	18	2
LSM14A	1:118061854-118117493	Protein_coding	LSM14AL1	28:22025444-22025461	1	17	CCTCTCTGATTATTTCT	0	intron_variant	RBM20	22	0
LSM14B	24:46170214-46180430	Protein_coding	LSM14BL1	5:78313366-78313384	5	18	CAAAAATATAATAAAAGA	0	intergenic_variant	-	0	0
LSM2	12:1270328-1279269	Protein_coding	LSM2L1	22:35508014-35508030	22	16	GATTCAATGCAATCCT	0	intergenic_variant	-	19	0
LSM5	14:44857882-44860929	Protein_coding	LSM5L1	10:57396262-57396262	1	na		0	intron_variant,non_coding_transcript_variant	LOC111097758	69	0
LTN1	31:23942493-24008787	Protein_coding	LTN1L1	25:37184445-37184461	41	16	CAGAACCCTGCCTTCA	1	intergenic_variant	-	0	0
LXN	23:51962877-51968447	Protein_coding	LXNL1	1:100533609-100533626	5	17	CTTTACATGAATTTTCT	2	intergenic_variant	-	13	1
LYRM7	11:19560143-19585350	Protein_coding	LYRM7L1	16:45238396-45238409	4	13	CATCCTGTCTTTT	0	upstream_gene_variant	ANKRD37	15	1
LZIC	5:63110854-63122487	Protein_coding	LZICL1	15:60509631-60509645	19	14	TGAAAACGTGTCTT	0	intergenic_variant	-	7	0
LZIC	5:63110854-63122487	Protein_coding	LZICL2	19:11666417-11666417	1	na		0	intergenic_variant	-	7	0
LZTFL1	20:42651762-42666426	Protein_coding	LZTFL1L1	25:41367584-41367601	1	17	AAAAAAAGAACTCAGGC	0	intergenic_variant	-	6	0
M6PR	27:36787745-36796194	Protein_coding	M6PRL1	1:62261601-62261617	1	16	TAAATTCTCATAAAAG	na	intron_variant	CLVS2	8	0
M6PR	27:36787745-36796194	Protein_coding	M6PRL2	X:16172934-16172934	5	na		0	upstream_gene_variant	LOC102152098	8	0
MAD2L1	18:55653677-55661017	Protein_coding	MAD2L1L1	38:22646789-22646805	1	16	AGTGCAATGGGAATCC	0	intron_variant	OR10J5	22	0
MALSU1	14:36959667-36968903	Protein_coding	MALSU1L1	6:59851082-59851099	3	17	TAAAAATATTGATGGAG	na	intergenic_variant	-	7	0
MAP2K4	5:36142610-36243673	Protein_coding	MAP2K4L1	16:13500873-13500888	4	15	TAAAACCAAATTAAC	0	downstream_gene_variant	LOC102152103	4	0
MAP4	20:40896920-41101626	Protein_coding	MAP4L1	3:50263501-50263516	3	15	AAAGATGGAGGTACC	0	intron_variant	AGBL1	1	0
MAP7D3	X:106608250-106640711	Protein_coding	MAP7D3L1	3:66518623-66518640	1	17	TGTTTTGTTTTGTTTTT	0	intron_variant	BOD1L1	0	0
MAPK3	6:18109184-18115728	Protein_coding	MAPK3L1	20:38279157-38279164	4	7	AGAACTA	1	intron_variant	DOCK3	7	1
MAPK6	30:17701154-17736072	Protein_coding	MAPK6L1	6:40495604-40495618	47	14	AAAAAAATGGTGAG	2	intergenic_variant	-	17	0
MAPK6	30:17701154-17736072	Protein_coding	MAPK6L2	8:39546010-39546024	1	14	TAAATTTTTTTCTT	na	intron_variant,non_coding_transcript_variant	LOC102151445	17	0
MAPRE2	7:54845121-54939054	Protein_coding	MAPRE2L1	34:19792565-19792582	3	17	CAACATATACATTTTTA	na	intergenic_variant	-	2	0
MTARC2	38:15426884-15451701	Protein_coding	MTARC2L1	11:56671342-56671506	2	na		na	non_coding_transcript_exon_variant	-	1	1
MARCKS	12:69980003-69987150	Protein_coding	MARCKSL1	29:19105847-19106063	1	na		na	intergenic_variant	-	2	0
MARCKSL1	2:68898750-68901139	Protein_coding	MARCKSL1L1	1:108061224-108061238	226	14	CACTGTGGGCTTTT	na	downstream_gene_variant	-	2	0
MAX	8:39441216-39465681	Protein_coding	MAXL1	33:10578645-10578660	3	15	CAAATTATGTATTTA	na	intergenic_variant	-	30	2
MBTD1	9:27010554-27078417	Protein_coding	MBTD1L1	32:2538323-2538339	1	16	CTGTCCCTATAGATTT	0	intergenic_variant	-	2	0
MCFD2	10:49091466-49101769	Protein_coding	MCFD2L1	1:92936311-92936326	1	15	TGTGATTTGTTTTTT	0	intron_variant	SLC1A1	10	1
MCFD2	10:49091466-49101769	Protein_coding	MCFD2L2	10:50187640-50187654	15	14	TCCATTTATATCTT	0	intron_variant,non_coding_transcript_variant	LOC111097744	10	1
MCL1	17:59759605-59763111	Protein_coding	MCL1L1	1:13164923-13164939	1	16	GGAAAAGATGAAAATC	0	intergenic_variant	-	32	0
MCL1	17:59759605-59763111	Protein_coding	MCL1L2	15:25677209-25677225	3	16	AAAAACAGTGACATTT	0	intergenic_variant	-	32	0
MCL1	17:59759605-59763111	Protein_coding	MCL1L3	31:8305853-8305999	1	na		0	intron_variant	ROBO1	32	0
MCL1	17:59759605-59763111	Protein_coding	MCL1L4	37:21511354-21511371	3	17	TAAAATATTGGTTATAG	0	intron_variant	SPAG16	32	0
MCTS1	X:92559648-92574576	Protein_coding	MCTS1L1	15:2818978-2818995	1	17	CAACCTTTCTTTTTTTA	0	intron_variant	PPT1	32	1
MCUR1	35:13188002-13222394	Protein_coding	MCUR1L1	22:35370178-35370193	1	15	CAGTTCAAATATTTG	0	intergenic_variant	-	18	3
MDH1	10:63316818-63334556	Protein_coding	MDH1L1	30:18988521-18988535	2	14	TACTGTTGCTTTCT	0	intergenic_variant	-	19	0
MDH1	10:63316818-63334556	Protein_coding	MDH1L2	32:5726864-5726874	2	10	AATCCATTTG	0	intron_variant	RASGEF1B	19	0
MDM2	10:10936288-10963118	Protein_coding	MDM2L1	7:55859221-55859238	4	17	TGATTCAACAGTTTTGT	na	intron_variant	NOL4	7	0
MEAF6	15:4944059-4965768	Protein_coding	MEAF6L1	17:32985978-32985994	4	16	GAACTCTCCCATTCCT	1	intron_variant,non_coding_transcript_variant	-	12	0
MED11	5:31821263-31822946	Protein_coding	MED11L1	6:37951218-37951234	2	16	AACAGAGAACAAATTT	0	downstream_gene_variant	LOC111096320	2	0
MED19	18:38490536-38497508	Protein_coding	MED19L1	21:37218019-37218040	4	21	AAAAATATATTGAAAATATCC	0	intron_variant	COPB1	1	0
MED24	9:22500937-22527838	Protein_coding	MED24L1	28:16535030-16535045	1	15	AAAAACATTTGTTAG	0	intron_variant	CFAP43	0	0
MED4	22:3396276-3411037	Protein_coding	MED4L1	28:4308023-4308034	1	11	GGAGGTCTAGT	na	intron_variant,non_coding_transcript_variant	LOC106557970	11	1
MED6	8:44301449-44323554	Protein_coding	MED6L1	29:25271926-25272002	1	na		0	intergenic_variant	-	8	0
MED7	4:52998748-53004063	Protein_coding	MED7L1	2:48546351-48546364	1	13	TAAAATGAATCTG	0	intron_variant,non_coding_transcript_variant	LOC102152511	0	0
MEMO1	17:25231982-25298786	Protein_coding	MEMO1L1	18:592215-592234	2	19	TCACATCTTTCCTATCTTT	0	intergenic_variant	-	23	0
MESD	3:56698417-56709632	Protein_coding	MESDL1	20:8623483-8623496	2	13	AAAGAGTAAATTC	na	intron_variant,non_coding_transcript_variant	LOC111091244	6	0
MEST	14:6435693-6449099	Protein_coding	MESTL1	1:92407914-92408366	1	na		na	intron_variant	GLIS3	34	0
MEST	14:6435693-6449099	Protein_coding	MESTL2	21:9006627-9006695	1	na		na	intergenic_variant	-	34	0
METAP2	15:35363494-35398168	Protein_coding	METAP2L1	23:40992178-40992189	30	11	ACAAATTTTAA	0	intergenic_variant	-	6	1
METTL15	21:48578735-48759264	Protein_coding	METTL15L1	1:42847221-42847236	2	15	AAAAAGATCATTTTA	0	intron_variant	MYCT1	7	0
MEX3C	1:23818790-23838106	Protein_coding	MEX3CL1	14:48327913-48327929	11	16	TACTCTATGGTTTCTT	2	intron_variant	ELMO1	0	0
MFSD14B	1:99201206-99271351	Protein_coding	MFSD14BL1	3:17108405-17108420	1	15	CATTATATTTTTCTT	0	intergenic_variant	-	0	0
MGME1	24:5068147-5083941	Protein_coding	MGME1L1	15:9727918-9727935	2	17	CTTATAGCTAATTTATT	0	intergenic_variant	-	3	0
MINDY1	17:60092245-60103797	Protein_coding	MINDY1L1	17:31000036-31000050	1	14	AAAAGATCGCTTCC	0	3_prime_UTR_variant	ARHGEF33	0	0
MINPP1	26:37585096-37629221	Protein_coding	MINPP1L1	4:56815699-56815699	1	na		1	intron_variant,non_coding_transcript_variant	-	7	0
MLF1	23:51918504-51935164	Protein_coding	MLF1L1	24:25687817-25687832	1	15	TAAAATAAAGAAATA	0	intergenic_variant	-	8	0
MMAA	15:44221082-44243530	Protein_coding	MMAAL1	11:18615006-18615019	2	13	TAAAAAACCTTTT	na	intron_variant,non_coding_transcript_variant	LOC111098016	1	0
UQCC2	12:3050329-3063831	Protein_coding	UQCC2L1	27:11334550-11334565	3	15	TCTTCTGTTGTTTAT	0	intron_variant	PRICKLE1	18	1
MORF4L1	3:58127152-58149709	Protein_coding	MORF4L1L1	1:118110913-118110932	1	19	CTGAAGAAGAATTCTTCTT	0	intron_variant	LSM14A	61	1
MPHOSPH6	5:69887092-69909647	Protein_coding	MPHOSPH6L1	13:25029324-25029338	3	14	AAAAGATGAATAAA	0	intron_variant,non_coding_transcript_variant	LOC102151705	38	0
MPV17	17:21280523-21290967	Protein_coding	MPV17L1	8:37233951-37233967	1	16	TATTACTGGTTATTTT	0	intergenic_variant	-	10	1
MRM3	9:45004382-45011834	Protein_coding	MRM3L1	6:55307084-55307095	3	11	AAAGATTTTTT	na	intron_variant	BCAR3	0	0
MRPL11	18:50890411-50893891	Protein_coding	MRPL11L1	2:22861398-22861411	1	13	CCTTTTGTTTTTC	0	downstream_gene_variant	FRMD4A	18	1
MRPL11	18:50890411-50893891	Protein_coding	MRPL11L2	21:29272775-29272775	1	na		0	intergenic_variant	-	18	1
MRPL11	18:50890411-50893891	Protein_coding	MRPL11L3	24:37931500-37931723	1	na		0	intron_variant,non_coding_transcript_variant	LOC106557671	18	1
MRPL15	29:5704572-5711577	Protein_coding	MRPL15L1	8:38626640-38626656	2	16	AGAAACTTTGAGGGAC	0	intron_variant	SYNE2	22	2
MRPL15	29:5704572-5711577	Protein_coding	MRPL15L2	20:12780766-12780781	6	15	TAGGGGTTAGTTTTC	0	intron_variant	ITPR1	22	2
MRPL30	10:43494658-43513241	Protein_coding	MRPL30L1	5:11600206-11600221	7	15	AGAAAGATGGATAAG	0	intron_variant	UBASH3B	20	1
MRPL30	10:43494658-43513241	Protein_coding	MRPL30L2	7:24878844-24878862	1	18	TATTATTCAGTTTTTAAT	0	intron_variant	RABGAP1L	20	1
MRPL30	10:43494658-43513241	Protein_coding	MRPL30L3	8:40099840-40099857	1	17	AAGAAAGTAAGGATATA	na	intron_variant,non_coding_transcript_variant	-	20	1
MRPL30	10:43494658-43513241	Protein_coding	MRPL30L4	11:64386639-64386656	2	17	CCCTGACTCCCCTTTTC	0	intron_variant	EPB41L4B	20	1
MRPL30	10:43494658-43513241	Protein_coding	MRPL30L5	25:29789990-29790006	1	16	TTTTTATTTCTCTGTT	na	intron_variant	ESCO2	20	1
MRPL35	17:38912895-38923703	Protein_coding	MRPL35L1	28:3297438-3297452	2	14	GAAAAGGTTCTGTG	0	intergenic_variant	-	37	0
MRPL42	15:33701938-33732885	Protein_coding	MRPL42L1	6:45412861-45412876	9	15	AAGAAGAAATAGATA	0	intergenic_variant	-	64	0
MRPL42	15:33701938-33732885	Protein_coding	MRPL42L2	8:10243040-10243079	1	39	ATAACTTGTTTACAGGAAATAAAAAGAAAAGAGAAAGCA	0	intron_variant	STRN3	64	0
MRPL42	15:33701938-33732885	Protein_coding	MRPL42L3	9:13154721-13154728	5	7	GGGAGCC	na	intron_variant	PSMD12	64	0
MRPL42	15:33701938-33732885	Protein_coding	MRPL42L4	18:52829981-52829981	1	na		0	intron_variant	DNAJC4	64	0
MRPL43	28:13674401-13675648	Protein_coding	MRPL43L1	15:50558017-50558017	1	na		0	intron_variant,non_coding_transcript_variant	LOC102152961	5	1
MRPL45	9:23829557-23838738	Protein_coding	MRPL45L1	36:30106582-30106598	87	16	TTCATATTGAAATTTT	2	upstream_gene_variant	GULP1	8	0
MRPL48	21:24391538-24456860	Protein_coding	MRPL48L1	8:16580278-16580292	4	14	GTAAAAATGATTCT	0	downstream_gene_variant	SSTR1	9	0
MRPL48	21:24391538-24456860	Protein_coding	MRPL48L2	8:50547859-50547874	2	15	AGAAACCTGATCAGG	na	intron_variant	ADCK1	9	0
MRPL53	17:48663271-48666078	Protein_coding	MRPL53L1	1:25899914-25899930	1	16	TAGGATGAAGTTTCTG	0	intergenic_variant	-	5	0
MRPL53	17:48663271-48666078	Protein_coding	MRPL53L2	3:52954736-52954748	2	12	TAATACCGTGAC	0	intergenic_variant	-	5	0
MRPL53	17:48663271-48666078	Protein_coding	MRPL53L3	10:53110395-53110411	9	16	TTATTCATATACTCTA	1	intergenic_variant	-	5	0
MRPL53	17:48663271-48666078	Protein_coding	MRPL53L4	11:26895867-26895881	2	14	AGATTCTGGATATA	0	intron_variant	MLANA	5	0
MRPL57	25:16979757-16982141	Protein_coding	MRPL57L1	15:8337871-8337886	1	15	TCTTTGCTCATTTTT	na	intron_variant	C15H16orf87	0	0
MRPL57	25:16979757-16982141	Protein_coding	MRPL57L2	25:28907704-28907721	1	17	AAGAATAAGAAAGGTGA	0	intron_variant	EXTL3	0	0
MRPL58	9:5449327-5457834	Protein_coding	MRPL58L1	5:87485127-87485139	1	12	ATAAAATTTTAG	0	intergenic_variant	-	0	0
MRPS16	4:23827690-23829319	Protein_coding	MRPS16L1	10:67584333-67584348	3	15	AGAAATGCAGAAACT	na	upstream_gene_variant	U2	1	0
MRPS22	23:35508478-35536081	Protein_coding	MRPS22L1	1:117398403-117398415	1	12	ACATTCTTTTAT	0	intron_variant	FXYD5	1	1
MRPS22	23:35508478-35536081	Protein_coding	MRPS22L2	6:9805567-9805583	13	16	CCTTGCCCTATTTTCT	0	intron_variant	CYP3A26	1	1
MRPS26	24:18215055-18216993	Protein_coding	MRPS26L1	13:332793-332809	1	16	AAGAGTCAGACACTTA	0	intron_variant	-	6	0
MRPS27	2:55263654-55351615	Protein_coding	MRPS27L1	16:41328696-41328889	2	na		0	intron_variant	ASAH1	4	0
MRPS31	25:521401-555678	Protein_coding	MRPS31L1	29:5621197-5621214	3	17	AAGAATGCCAACTTCTC	na	intron_variant	TCEA1	10	0
MRS2	35:22460435-22496064	Protein_coding	MRS2L1	3:47740405-47740405	2	na		na	upstream_gene_variant	-	8	0
MRTO4	2:79360897-79367038	Protein_coding	MRTO4L1	7:80578245-80578253	1	8	AACCTATT	na	intergenic_variant	-	41	1
MRTO4	2:79360897-79367038	Protein_coding	MRTO4L2	20:29732688-29732703	1	15	GGGAATTAGTATTTA	na	upstream_gene_variant	-	41	1
MRTO4	2:79360897-79367038	Protein_coding	MRTO4L3	26:24027519-24027532	7	13	TCATCCCCATTTT	0	intergenic_variant	-	41	1
MSANTD2	5:9623023-9654860	Protein_coding	MSANTD2L1	36:15316830-15316845	1	15	TCTTTATAGGTTTTG	0	intron_variant	ERICH2	0	0
MTFR1	29:15314955-15390776	Protein_coding	MTFR1L1	3:75384722-75384722	1	na		na	intron_variant,non_coding_transcript_variant	-	21	0
MTFR1	29:15314955-15390776	Protein_coding	MTFR1L2	3:79310360-79310374	1	14	AAAAACATTTTTGC	na	intergenic_variant	-	21	0
MTFR1	29:15314955-15390776	Protein_coding	MTFR1L3	7:19654781-19656077	1	na		na	upstream_gene_variant	-	21	0
MTFR1L	2:74116837-74133414	Protein_coding	MTFR1LL1	11:25407172-25407186	1	14	GAAATAAAGGGCAA	0	intron_variant	KLHL3	8	0
MTFR2	1:28830818-28844875	Protein_coding	MTFR2L1	12:48060911-48060931	3	20	TCAGCAGGAAGGCTGCTTGA	0	intron_variant	RNGTT	2	1
MTHFD1	8:38831672-38889607	Protein_coding	MTHFD1L1	9:26411554-26411554	1	na		0	intron_variant	RSAD1	11	1
MTPAP	2:16666742-16695753	Protein_coding	MTPAPL1	18:549899-549964	3	na		na	intergenic_variant	-	0	0
MVB12A	20:45365850-45370114	Protein_coding	MVB12AL1	14:52121353-52121353	1	na		0	upstream_gene_variant	LOC106559677	0	0
MYL12B	7:69877727-69895196	Protein_coding	MYL12BL1	1:57182713-57182730	11	17	AGAAATTATTTTTTTTT	0	intergenic_variant	-	50	1
MYL12B	7:69877727-69895196	Protein_coding	MYL12BL2	10:50695728-50695743	2	15	GCCCTGGAAGATTCT	0	intergenic_variant	-	50	1
MYL9	24:25322800-25329937	Protein_coding	MYL9L1	11:26713228-26713245	1	17	AAGAAAGTAGGGGGAGG	na	intron_variant	SIL1	17	3
MZT1	22:26862454-26880213	Protein_coding	MZT1L1	12:61267554-61267568	2	14	AATCATGGAGCAGG	0	intergenic_variant	-	0	0
MZT2B	26:30420222-30427393	Protein_coding	MZT2BL1	13:48888192-48888192	1	na		0	intergenic_variant	-	0	0
MZT2B	26:30420222-30427393	Protein_coding	MZT2BL2	23:420593-420611	6	18	TACAACTTTCTAACAATA	1	intergenic_variant	-	0	0
NAA20	24:3313028-3327972	Protein_coding	NAA20L1	18:34191916-34191933	10	17	AAAGTAAAACCATTTTT	0	intron_variant	KIAA1549L	21	1
NAA60	6:37759233-37784224	Protein_coding	NAA60L1	1:27513246-27513261	3	15	TATGGTTTATTTTCT	0	intergenic_variant	-	3	0
NAB1	37:1207619-1243546	Protein_coding	NAB1L1	17:25147248-25147265	3	17	AATAGATGCAGAGAAAG	1	intergenic_variant	-	9	0
NAF1	15:59430809-59470306	Protein_coding	NAF1L1	8:13016121-13016121	1	na		0	intergenic_variant	-	1	0
NAMPT	18:14110045-14211268	Protein_coding	NAMPTL1	1:54811672-54811689	1	17	CACATTTTATTTTTTTT	0	intron_variant	-	3	0
NAP1L1	15:19141803-19165454	Protein_coding	NAP1L1L1	14:33505589-33505603	3	14	TCTCTTACCTTTTA	0	intergenic_variant	-	47	0
NAP1L1	15:19141803-19165454	Protein_coding	NAP1L1L2	17:29923085-29923100	11	15	TTAGAGGTAATTTTT	0	intron_variant,non_coding_transcript_variant	LOC102154187	47	0
NAP1L1	15:19141803-19165454	Protein_coding	NAP1L1L3	18:49079285-49079285	22	na		na	intron_variant	IGHMBP2	47	0
NAP1L1	15:19141803-19165454	Protein_coding	NAP1L1L4	31:9914238-9914255	1	17	TAAAAATAGTGACTCTG	0	intron_variant	ROBO2	47	0
NAP1L1	15:19141803-19165454	Protein_coding	NAP1L1L5	32:13158855-13158870	3	15	TATGGAAGGCTTTTA	0	intron_variant	MMRN1	47	0
NARS1	1:18320941-18338185	Protein_coding	NARS1L1	1:88216655-88216657	7	2	TA	2	intron_variant	TJP2	8	0
NARS1	1:18320941-18338185	Protein_coding	NARS1L2	25:11157844-11157858	3	14	AGGAGTCTAAACTC	na	intron_variant,non_coding_transcript_variant	LOC111092297	8	0
NBN	29:35416093-35477569	Protein_coding	NBNL1	12:1798945-1798957	1	12	AAGGTTTTATGT	4	intron_variant	C12H6orf10	1	0
NCK2	10:37584351-37734388	Protein_coding	NCK2L1	12:20387294-20387294	1	na		0	intergenic_variant	-	0	0
NCL	25:43330524-43384909	Protein_coding	NCLL1	20:15318883-15318898	1	15	TATACATTTGTTTTT	na	intergenic_variant	-	16	0
NCOA5	24:33323645-33352835	Protein_coding	NCOA5L1	1:8202838-8202848	4	10	AAAAGAATGA	1	intron_variant	RTTN	0	0
NDFIP1	2:36978148-37065247	Protein_coding	NDFIP1L1	25:21566119-21566135	12	16	AGAATTACTAAAATTT	0	intergenic_variant	-	9	0
NDST3	32:37309829-37487977	Protein_coding	NDST3L1	15:16073668-16073668	1	na		0	intron_variant	ERI3	0	0
NDUFA1	17:60181098-60181510	Protein_coding	NDUFA1L1	17:51754197-51754214	3	17	AGATATAGAAGCTAAGG	na	intron_variant	HIPK1	67	0
NDUFA3	1:103098639-103101226	Protein_coding	NDUFA3L1	12:10985417-10985433	23	16	GCCTGTTTGGGTTTCT	0	intron_variant	TRERF1	45	4
NDUFA3	1:103098639-103101226	Protein_coding	NDUFA3L2	35:10528342-10528357	1	15	AGAAGCCCTGCATCC	0	intron_variant	MAK	45	4
NDUFAF4	12:55311482-55319879	Protein_coding	NDUFAF4L1	2:6242423-6242444	5	21	TAAAAGAATACATTAAAAATG	0	intron_variant	LOC111091106	33	0
NDUFAF4	12:55311482-55319879	Protein_coding	NDUFAF4L2	X:4998499-4998514	12	15	TAAAAAATCAGCTTC	1	intron_variant,non_coding_transcript_variant	LOC111094756	33	0
NDUFB11	X:40744408-40746831	Protein_coding	NDUFB11L1	6:49242398-49242411	3	13	GAAAATAATTACA	na	intron_variant	EXTL2	10	0
NDUFB4	33:24044498-24051545	Protein_coding	NDUFB4L1	9:25122526-25122543	3	17	AATTTCTATTTTTCTTT	na	downstream_gene_variant	U2	64	0
NDUFV1	18:49882844-49888448	Protein_coding	NDUFV1L1	5:55112686-55112699	9	13	AAGAAAACCTGTG	0	intergenic_variant	-	2	0
NDUFV2	7:75150293-75184084	Protein_coding	NDUFV2L1	5:78075238-78075252	1	14	AAACTGTCATAAGA	na	downstream_gene_variant	-	44	0
NDUFV3	31:37118201-37131035	Protein_coding	NDUFV3L1	1:112546558-112546564	12	6	TTTTCC	0	intron_variant,non_coding_transcript_variant	LOC100688849	2	1
NDUFV3	31:37118201-37131035	Protein_coding	NDUFV3L2	2:11923409-11923425	1	16	CAGACTTAAAGGTTTA	1	intron_variant	NEBL	2	1
NECAP2	2:81275294-81289405	Protein_coding	NECAP2L1	10:50576751-50576765	1	14	AAGACACAAACGTA	na	intron_variant	LHCGR	4	1
NEDD4L	1:17629163-17858471	Protein_coding	NEDD4LL1	10:44401413-44401429	6	16	TTAAAATGCTACCTGA	0	intron_variant	VWA3B	2	0
NEK7	7:4557754-4755912	Protein_coding	NEK7L1	8:33345369-33345384	1	15	AAAAGGGCTGCCAAG	0	intergenic_variant	-	7	0
NELFE	12:1406411-1412387	Protein_coding	NELFEL1	11:14497296-14497312	60	16	CTCTACTGCTTTTGTT	0	intron_variant,non_coding_transcript_variant	-	0	0
NET1	2:30450946-30463280	Protein_coding	NET1L1	37:29306415-29306435	0	20	AAAAAGCTAATACCTAGAAG	na	intergenic_variant	-	3	0
NFU1	10:68134865-68161841	Protein_coding	NFU1L1	11:68039588-68039700	1	na		0	intergenic_variant	-	14	0
NGRN	3:53209206-53214629	Protein_coding	NGRNL1	15:3851190-3851302	1	na		0	intron_variant	RHBDL2	0	0
NHEJ1	37:25637214-25719241	Protein_coding	NHEJ1L1	24:4191053-4191069	3	16	ATAGAACACTCCCATA	na	intron_variant,non_coding_transcript_variant	-	2	0
NIP7	5:80287699-80316275	Protein_coding	NIP7L1	2:27394472-27394487	1	15	AAAAAGTAAGAGACG	0	intergenic_variant	-	53	2
NIP7	5:80287699-80316275	Protein_coding	NIP7L2	8:18500464-18500480	1	16	TAAAATTTTACTGGGT	0	intergenic_variant	-	53	2
NIPA2	3:32051313-32095379	Protein_coding	NIPA2L1	12:46390284-46390298	5	14	ATGAATACGTGGCT	0	intergenic_variant	-	10	0
NIPA2	3:32051313-32095379	Protein_coding	NIPA2L2	16:13569030-13569045	1	15	AAAGATATCATTAAG	0	upstream_gene_variant	LYPD9P	10	0
NIPA2	3:32051313-32095379	Protein_coding	NIPA2L3	38:19250878-19250883	1	5	TAAAT	0	downstream_gene_variant	-	10	0
NIPAL2	13:427216-493861	Protein_coding	NIPAL2L1	26:31755277-31755285	1	8	AGGAACTG	0	intergenic_variant	-	0	0
NIPSNAP1	26:22785902-22800241	Protein_coding	NIPSNAP1L1	1:15380763-15380778	3	15	TAAAACATGGAGGTA	na	intron_variant	CDH20	9	1
NIT2	33:6944340-6960540	Protein_coding	NIT2L1	3:79630633-79630650	2	17	ATAACTTTCTTATTGAG	0	intergenic_variant	-	9	0
NKIRAS2	9:20851014-20854953	Protein_coding	NKIRAS2L1	27:36868393-36868408	6	15	CAATAAATCTTTTTA	0	intron_variant	A2ML1	2	0
NKX1-2	28:33806298-33811258	Protein_coding	NKX1-2L1	19:19315035-19315048	2	13	AATGTAGAGGGAA	0	intron_variant	PRDM5	0	0
NME1	9:26990336-26998691	Protein_coding	NME1L1	5:42582380-42582396	1	16	TAAAATTGCCTCAGTT	na	intergenic_variant	-	30	7
NME1	9:26990336-26998691	Protein_coding	NME1L2	9:4636234-4636250	2	16	AAGACCTGAGCTGAGA	0	intron_variant	TEN1	30	7
NME1	9:26990336-26998691	Protein_coding	NME1L3	11:15609994-15610010	3	16	AGAATTTCTCCTGTAG	na	intergenic_variant	-	30	7
NME1	9:26990336-26998691	Protein_coding	NME1L4	15:17900976-17900991	2	15	TCATATTCTTTCTTT	0	intron_variant,non_coding_transcript_variant	LOC102157181	30	7
NME1	9:26990336-26998691	Protein_coding	NME1L5	16:34800972-34801160	2	na		0	upstream_gene_variant	DUSP4	30	7
NME1	9:26990336-26998691	Protein_coding	NME1L6	21:42250401-42250413	1	12	AAAAAAAAAAAA	0	upstream_gene_variant	-	30	7
NME1	9:26990336-26998691	Protein_coding	NME1L7	36:21107744-21107764	2	20	AAAAAGAGGAAATGTGGGGG	0	intergenic_variant	-	30	7
NME1	9:26990336-26998691	Protein_coding	NME1L8	X:123251288-123251487	2	na		0	upstream_gene_variant	RAB39B	30	7
NMRK1	1:83140816-83163292	Protein_coding	NMRK1L1	23:3663554-3663554	2	na		0	intron_variant	SUSD5	8	0
NMT1	9:18422103-18462612	Protein_coding	NMT1L1	16:2661424-2661430	29	6	TATTTT	1	intron_variant	CNTNAP2	10	0
NMT1	9:18422103-18462612	Protein_coding	NMT1L2	18:53055809-53055826	3	17	GCCCACTCCAGGGTTCT	na	intron_variant	MACROD1	10	0
NMT1	9:18422103-18462612	Protein_coding	NMT1L3	32:1453504-1453518	9	14	TAAGGCCTTGTCTT	0	intergenic_variant	-	10	0
NNAT	24:26119153-26121573	Protein_coding	NNATL1	36:28808394-28808407	1	13	TATTGTTGCTGTT	na	intron_variant	ITGAV	2	1
NOL12	10:26919771-26926547	Protein_coding	NOL12L1	38:17193106-17193124	2	18	AAGAATACATCATCGAGT	na	intron_variant,non_coding_transcript_variant	-	9	0
NOL4L	24:21808726-21939596	Protein_coding	NOL4LL1	11:8337150-8337166	1	16	TAAAAGTTATCATTTT	0	intron_variant	-	0	0
NOP10	30:766801-767615	Protein_coding	NOP10L1	24:4966791-4966798	2	7	AAGAGAT	0	intron_variant	KAT14	0	0
NOP53	1:108307039-108315732	Protein_coding	NOP53L1	1:19075841-19075857	1	16	TCTAGCTCCATCTCCT	0	intron_variant	WDR7	0	0
NOP58	37:11255562-11287325	Protein_coding	NOP58L1	27:6170110-6170348	3	na		0	upstream_gene_variant	C27H12orf54	1	0
NOX4	21:10615153-10782927	Protein_coding	NOX4L1	7:26345057-26345073	2	16	AACTATGTCCTAAACA	0	upstream_gene_variant	FASLG	0	0
NR2F6	20:45490113-45500606	Protein_coding	NR2F6L1	29:4578373-4578390	2	17	TCCCTGACTTTCTTTTC	0	intergenic_variant	-	1	0
NR6A1	9:58385981-58485003	Protein_coding	NR6A1L1	1:72191012-72191012	0	na		na	intergenic_variant	-	0	0
NRSN1	35:22216835-22237398	Protein_coding	NRSN1L1	4:12729546-12729561	11	15	GAATAGCAGAGAATG	0	intron_variant	ANK3	0	0
NSDHL	X:120720118-120754573	Protein_coding	NSDHLL1	14:35081891-35081910	103	19	AACAAATAATTACTGAACA	0	intergenic_variant	-	2	0
NSMCE1	6:19330815-19363240	Protein_coding	NSMCE1L1	3:54607067-54607086	3	19	GCCTTGCCGAATCTTTCTT	na	intron_variant	FSD2	7	0
NSUN6	2:18477150-18534716	Protein_coding	NSUN6L1	4:47479126-47479141	3	15	AGAAAGCTACCTCAA	na	intergenic_variant	-	0	0
NT5DC2	20:37241251-37249872	Protein_coding	NT5DC2L1	1:88527505-88527505	2	na		0	intron_variant	PIP5K1B	5	1
NUBP1	6:31900540-31922087	Protein_coding	NUBP1L1	34:32146130-32146144	3	14	TAAAATGTTTTCAC	0	intron_variant	ZBBX	1	0
NUDCD1	13:9815394-9895410	Protein_coding	NUDCD1L1	2:50189653-50189669	13	16	ATGTTTATCCATACAT	0	intron_variant	RNF180	0	0
NUDCD1	13:9815394-9895410	Protein_coding	NUDCD1L2	6:29511513-29511527	2	14	AAGAAATATTAGGT	0	intergenic_variant	-	0	0
NUDT12	3:7693903-7708930	Protein_coding	NUDT12L1	36:6746242-6746255	1	13	AAAATAGAACCTA	0	intron_variant	TANK	0	0
NUFIP2	9:43380048-43411597	Protein_coding	NUFIP2L1	5:43076704-43076722	1	18	AAGAGTTTATGGTGAGTC	0	intergenic_variant	-	2	0
NUFIP2	9:43380048-43411597	Protein_coding	NUFIP2L2	28:12881514-12881530	1	16	CTATACTCTGTATTTT	na	intron_variant	CPN1	2	0
NUP54	32:751568-782342	Protein_coding	NUP54L1	28:14282437-14282451	21	14	AAAAGTCAAGTCTA	0	intron_variant	FBXW4	2	0
NUP42	14:36865737-36887682	Protein_coding	NUP42L1	11:19964865-19964882	1	17	TAAAACCGATATTTATC	0	intron_variant	-	0	0
NUS1	1:57866760-57895505	Protein_coding	NUS1L1	10:56306874-56306892	1	18	GAATTAATAGTTTTTGAG	0	downstream_gene_variant	-	18	0
NUSAP1	30:8358737-8435039	Protein_coding	NUSAP1L1	1:108662656-108662671	20	15	AACATCCAGATTTTA	0	intron_variant	C5AR1	4	3
NUSAP1	30:8358737-8435039	Protein_coding	NUSAP1L2	12:5648093-5648109	1	16	ACAAATGAACCTTGCA	0	intergenic_variant	-	4	3
NUSAP1	30:8358737-8435039	Protein_coding	NUSAP1L3	16:28714092-28714106	2	14	ATTTCTACCCCTAG	0	intergenic_variant	-	4	3
NUSAP1	30:8358737-8435039	Protein_coding	NUSAP1L4	26:33473445-33473459	1	14	AAGAAAGAGTAGAA	na	intron_variant	PCDH15	4	3
NUSAP1	30:8358737-8435039	Protein_coding	NUSAP1L5	33:19450317-19450330	3	13	ATATACATTTCTT	na	intron_variant,non_coding_transcript_variant	-	4	3
OARD1	12:9821947-9828062	Protein_coding	OARD1L1	14:39411284-39411299	9	15	CAAGATTCAGACATT	0	intergenic_variant	-	1	0
OAS2	26:10431881-10447935	Protein_coding	OAS2L1	18:32498692-32498708	2	16	AAAATTTTATGTTTTA	0	intron_variant	PAMR1	0	0
OAT	28:33763661-33788817	Protein_coding	OATL1	16:42677454-42677567	1	na		0	intergenic_variant	-	13	0
OCIAD1	13:44608474-44634665	Protein_coding	OCIAD1L1	12:52817429-52817446	1	17	GGACATTTGGATTCTTG	0	intergenic_variant	-	7	0
OLA1	36:18178239-18340284	Protein_coding	OLA1L1	8:45341910-45341926	179	16	CTAAAGTTCTGAACGT	3	intergenic_variant	-	29	0
ORMDL1	37:509592-521036	Protein_coding	ORMDL1L1	2:80702029-80702045	1	16	GAAAGGTGATGGGGAG	0	intron_variant	ARHGEF10L	11	0
ORMDL1	37:509592-521036	Protein_coding	ORMDL1L2	29:3277818-3277833	1	15	AAAAAATTATTTTGG	0	3_prime_UTR_variant	PXDNL	11	0
ORMDL1	37:509592-521036	Protein_coding	ORMDL1L3	33:7191221-7191239	2	18	AGAAAAGTATGGAAAATA	0	intron_variant	ADGRG7	11	0
OST4	17:21064737-21066524	Protein_coding	OST4L1	1:81063783-81063797	1	14	AAAAAAAATTTTAG	na	intron_variant	GNA14	0	0
OST4	17:21064737-21066524	Protein_coding	OST4L2	2:69339433-69339449	1	16	GATACCAACAGCTTTG	0	downstream_gene_variant	-	0	0
OTUD6B	29:36466596-36485509	Protein_coding	OTUD6BL1	3:9161563-9161579	2	16	TTTGTCAAGTTTCTTT	0	intergenic_variant	-	22	0
OTUD6B	29:36466596-36485509	Protein_coding	OTUD6BL2	4:60181303-60181318	3	15	AATACCCGAATGGTA	0	upstream_gene_variant	HTR4	22	0
OTUD6B	29:36466596-36485509	Protein_coding	OTUD6BL3	25:15123816-15123830	1	14	AAATAAATAAATAA	0	intergenic_variant	-	22	0
OTUD6B	29:36466596-36485509	Protein_coding	OTUD6BL4	30:12333819-12333824	1	5	AAGAC	na	intergenic_variant	-	22	0
OTUD6B	29:36466596-36485509	Protein_coding	OTUD6BL5	32:23446564-23446580	1	16	CAAAACGAAAAAGAGA	0	intron_variant	BANK1	22	0
OXCT1	4:67709846-67841737	Protein_coding	OXCT1L1	26:25917044-25917060	2	16	CCATTTGTCCTTTCTG	0	intron_variant	-	17	0
OXR1	13:7220959-7580881	Protein_coding	OXR1L1	X:72473364-72473386	3	22	AAAATTAGGAAATGGAGAAAGA	na	intergenic_variant	-	18	0
PA2G4	10:426074-437044	Protein_coding	PA2G4L1	10:53156147-53156163	2	16	AAGAAATGGGCAGAAG	na	intergenic_variant	-	26	0
PABPN1	8:3580768-3585546	Protein_coding	PABPN1L1	30:34474035-34474053	26	18	GGCAAGTAATATTTAATT	0	intergenic_variant	-	25	0
PACS2	8:72672861-72721655	Protein_coding	PACS2L1	29:6238958-6238969	1	11	AAGAAAATTCA	na	intron_variant	-	0	0
PAPSS1	32:28136741-28235529	Protein_coding	PAPSS1L1	3:20124344-20124357	5	13	CAAGCTGAGGTTT	0	intron_variant,non_coding_transcript_variant	-	2	0
PAPSS1	32:28136741-28235529	Protein_coding	PAPSS1L2	6:32813526-32813542	4	16	AAAAAGCATGTCATTC	1	intergenic_variant	-	2	0
PAPSS1	32:28136741-28235529	Protein_coding	PAPSS1L3	7:57295531-57295547	1	16	CGGATTTTGCTTTTGT	na	intron_variant	GAREM1	2	0
PAPSS1	32:28136741-28235529	Protein_coding	PAPSS1L4	12:11215735-11215749	6	14	TGAAATTTTCATTT	0	intron_variant	UBR2	2	0
PAPSS1	32:28136741-28235529	Protein_coding	PAPSS1L5	19:33714542-33714561	1	19	GATAATAGAATATTTTTTA	na	intron_variant	DPP10	2	0
PAPSS1	32:28136741-28235529	Protein_coding	PAPSS1L6	32:4049883-4049896	2	13	TGTTTCTTTTATT	na	intergenic_variant	-	2	0
PARD3	2:2252262-2791459	Protein_coding	PARD3L1	32:35271571-35271588	0	17	AATTATGGAAACTTCAT	na	intergenic_variant	-	0	0
PAWR	15:22114014-22159287	Protein_coding	PAWRL1	1:11855682-11855701	1	19	CTATTTGTATGTCTTCTTT	2	intron_variant,non_coding_transcript_variant	LOC111093733	1	0
PBDC1	X:59068733-59073085	Protein_coding	PBDC1L1	7:19653440-19653460	1	20	CAAAATTTAAAATTATAGGG	na	upstream_gene_variant	-	15	2
PBDC1	X:59068733-59073085	Protein_coding	PBDC1L2	7:35876305-35876318	5	13	TGTCCTTGGTATT	0	intron_variant,non_coding_transcript_variant	-	15	2
PBDC1	X:59068733-59073085	Protein_coding	PBDC1L3	7:79699507-79699517	1	10	CCCTCATCGT	na	intron_variant	CTIF	15	2
PBDC1	X:59068733-59073085	Protein_coding	PBDC1L4	34:12342762-12342781	24	19	ATTAAAAATGCTATAACTG	0	intergenic_variant	-	15	2
PBK	25:29751805-29781806	Protein_coding	PBKL1	8:44236744-44236759	1	15	TAAAACCTGTGAATC	na	downstream_gene_variant	ADAM21	6	0
PBX2	12:1577639-1582609	Protein_coding	PBX2L1	34:2511558-2511567	2	9	AGCTTTTTG	0	intergenic_variant	-	3	0
PCID2	22:60602440-60623811	Protein_coding	PCID2L1	24:7615302-7615315	2	13	AAGACATGTTCTT	3	intron_variant	MACROD2	2	0
PCMT1	1:40494441-40539453	Protein_coding	PCMT1L1	26:5870611-5870626	2	15	TGATGCATATTTTTT	0	intron_variant	DNAH10	5	0
PCNP	33:7960097-7978062	Protein_coding	PCNPL1	1:18064818-18064837	11	19	ATAGAAAGATCGTCAGGGC	0	intergenic_variant	-	85	3
PCNP	33:7960097-7978062	Protein_coding	PCNPL2	7:48098793-48098807	13	14	CAAAAAGATAATAA	1	intergenic_variant	-	85	3
PCNP	33:7960097-7978062	Protein_coding	PCNPL3	19:16173155-16173172	1	17	TCTATATTTTGGCTATT	0	intergenic_variant	-	85	3
PCTP	9:30725209-30749891	Protein_coding	PCTPL1	32:38018397-38018411	1	14	AAAAGAAAAATAAG	0	intron_variant	SYNPO2	85	0
PDCD5	1:119379427-119384664	Protein_coding	PDCD5L1	2:22929345-22929363	107	18	ACCAGGTCCCAATGTTTT	0	intron_variant,non_coding_transcript_variant	LOC102156435	44	3
PDCL3	10:42214127-42223986	Protein_coding	PDCL3L1	37:25320533-25320533	1	na		na	intron_variant	STK36	32	1
PDE3B	21:37364940-37532152	Protein_coding	PDE3BL1	6:45661939-45661939	0	na		na	intergenic_variant	-	0	0
PDE8A	3:54278498-54367492	Protein_coding	PDE8AL1	3:78638210-78638210	1	na		0	intergenic_variant	-	1	0
PDF	5:80323573-80325665	Protein_coding	PDFL1	32:21554279-21554291	1	12	ATTTCCTTTTAA	0	3_prime_UTR_variant	TRMT10A	1	0
PDHB	20:32185420-32191592	Protein_coding	PDHBL1	8:62058832-62058846	2	14	TAAAAAATAAATTA	0	intron_variant	DGLUCY	10	2
PDLIM1	28:8770882-8817828	Protein_coding	PDLIM1L1	12:44747915-44747933	4	18	TCTTTGCTCATGTTCTTT	0	intergenic_variant	-	20	1
PDXP	10:26945751-26952234	Protein_coding	PDXPL1	6:22778814-22778831	1	17	AGGAGCCCCCAACCTTA	na	upstream_gene_variant	LOC102153038	0	0
PDZD11	X:54735579-54739084	Protein_coding	PDZD11L1	4:52279185-52279201	7	16	AATAATATGTACATCC	0	intergenic_variant	-	29	1
PEBP1	26:14522124-14526370	Protein_coding	PEBP1L1	1:111301426-111301444	2	18	AAGATTAAAATCTAGAGA	0	3_prime_UTR_variant	ZNF283	42	1
PES1	26:23655994-23672707	Protein_coding	PES1L1	1:70480659-70480673	4	14	CTGCTTTCCTCTTC	0	intron_variant	ZNF367	11	0
PES1	26:23655994-23672707	Protein_coding	PES1L2	3:33251281-33251298	12	17	TAAAAGTGTTTTGATTG	0	intron_variant	GABRG3	11	0
PES1	26:23655994-23672707	Protein_coding	PES1L3	7:21430397-21430415	18	18	ATAGAAGTTTCTTGCCTG	0	intron_variant	RASAL2	11	0
PES1	26:23655994-23672707	Protein_coding	PES1L4	20:5559849-5559857	1	8	TATTTCTT	0	intron_variant	PLXND1	11	0
PES1	26:23655994-23672707	Protein_coding	PES1L5	23:3826532-3826549	31	17	ATAAAAATGATTAAATT	1	intron_variant,non_coding_transcript_variant	LOC111091917	11	0
PES1	26:23655994-23672707	Protein_coding	PES1L6	29:33821513-33821531	8	18	TAAATAATGGAGCAATCC	0	intergenic_variant	-	11	0
PES1	26:23655994-23672707	Protein_coding	PES1L7	35:22886984-22886999	1	15	AAGTTTCTCCTTTCC	0	intron_variant	RIPOR2	11	0
PEX19	38:21939054-21945281	Protein_coding	PEX19L1	7:48699738-48699753	2	15	AAAAATGATCAAACA	na	intron_variant	PIK3C3	1	0
PFDN5	27:1906133-1909613	Protein_coding	PFDN5L1	6:41162656-41162674	1	18	TAGACCACATCTTCTTTA	0	intergenic_variant	-	31	4
PFDN5	27:1906133-1909613	Protein_coding	PFDN5L2	13:59221002-59221026	1	24	TTCCTTGAAATATAAGTCATATTT	0	intron_variant	UGT2A1	31	4
PFDN5	27:1906133-1909613	Protein_coding	PFDN5L3	16:15868880-15868891	1	11	GTATTCTGTTA	na	intron_variant	GALNTL5	31	4
PFDN5	27:1906133-1909613	Protein_coding	PFDN5L4	21:6617241-6617255	5	14	AAGTACTTTATGCA	0	intron_variant	LOC102151931	31	4
PFDN5	27:1906133-1909613	Protein_coding	PFDN5L5	24:25624049-25624064	2	15	TAACCAACCATTTAA	0	3_prime_UTR_variant	SAMHD1	31	4
PFDN5	27:1906133-1909613	Protein_coding	PFDN5L6	32:28375293-28375311	1	18	AAAAGAAATACAAAATAA	0	intron_variant	SGMS2	31	4
PFDN5	27:1906133-1909613	Protein_coding	PFDN5L7	32:32534408-32534421	5	13	TCTGGATAGTTTT	0	intron_variant	ANK2	31	4
PFDN6	12:2729562-2730858	Protein_coding	PFDN6L1	10:35050963-35050977	11	14	CGAAAAAAAACTTC	0	intron_variant	CCDC138	22	2
PFN1	5:31670483-31671891	Protein_coding	PFN1L1	2:23515805-23515822	3	17	CCTGTATCTACCATTTT	na	intron_variant	CCDC3	47	0
PFN1	5:31670483-31671891	Protein_coding	PFN1L2	21:12659379-12659379	1	na		0	intron_variant	TMEM135	47	0
PGM1	5:46444433-46577621	Protein_coding	PGM1L1	4:88225750-88225764	22	14	TCATCGCAACCATT	0	intron_variant	ANKH	1	0
PGRMC1	X:91329243-91337951	Protein_coding	PGRMC1L1	1:75142109-75142124	4	15	AAGATATACATTTAA	0	intron_variant	SLC28A3	6	1
PGRMC2	19:12715286-12733610	Protein_coding	PGRMC2L1	8:22898290-22898306	1	16	GGTACAACTTCTTTTA	na	intron_variant,non_coding_transcript_variant	LOC111097211	3	0
PHB1	9:25525711-25536722	Protein_coding	PHB1L1	X:2578344-2578362	2	18	ATAAAAAAAATAAAAATA	0	intron_variant,non_coding_transcript_variant	LOC111094843	148	1
PICALM	21:13437819-13540167	Protein_coding	PICALML1	29:31902492-31902507	1	15	TTACAGAAGTTTTTA	0	intergenic_variant	-	0	0
PIGP	31:32222284-32230633	Protein_coding	PIGPL1	5:16511831-16511848	15	17	TCAAAAGACTCAGACTT	0	intergenic_variant	-	69	4
PIGY	32:11808967-11812436	Protein_coding	PIGYL1	2:51780842-51780858	1	16	AATATACAATGTCCAA	0	intron_variant	SREK1	0	0
PIGY	32:11808967-11812436	Protein_coding	PIGYL2	4:75289164-75289179	2	15	AAATAAAAAATTGAA	na	intergenic_variant	-	0	0
PINX1	25:27090244-27182377	Protein_coding	PINX1L1	4:68249977-68249993	1	16	AGAAGTAAAATCATAA	na	intron_variant	C6	3	1
PIP4P2	29:36376211-36410680	Protein_coding	PIP4P2L1	12:1315910-1315925	1	15	GAGCATGTGACTCTT	0	intergenic_variant	-	0	0
PITPNB	26:21304464-21369221	Protein_coding	PITPNBL1	24:11771490-11771505	2	15	AAAATCCCTGCTTGC	0	intron_variant	SLX4IP	14	0
PKIB	1:61960466-62049553	Protein_coding	PKIBL1	32:6126370-6126386	1	16	TTTTTTTTTTTTTTTT	0	intron_variant,non_coding_transcript_variant	-	0	0
PKM	30:35712853-35735953	Protein_coding	PKML1	13:7921729-7921746	15	17	CTTAATAAAATATTCTT	0	upstream_gene_variant	-	32	0
PLA2G4A	7:19804412-19952532	Protein_coding	PLA2G4AL1	22:29406808-29406825	4	17	TAAGAATTATAAGTCCA	0	intron_variant	UCHL3	0	0
PLAGL1	1:35418470-35529230	Protein_coding	PLAGL1L1	28:5960022-5960362	1	na		na	intergenic_variant	-	0	0
PLG	1:49497229-49535260	Protein_coding	PLGL1	12:25203745-25203763	3	18	TCTTCTAGTTATAATTGT	na	intron_variant,non_coding_transcript_variant	-	4	0
PLK1	6:22165338-22176847	Protein_coding	PLK1L1	17:15179478-15179478	2	na		na	intergenic_variant	-	1	0
PLS1	23:38243631-38347195	Protein_coding	PLS1L1	14:50172773-50172790	3	17	AAAGAAAACCCATTCTG	na	intergenic_variant	-	2	0
PNP	15:17808454-17815987	Protein_coding	PNPL1	22:11817006-11817061	5	na		1	intergenic_variant	-	34	0
PNPLA8	18:12134921-12181496	Protein_coding	PNPLA8L1	X:69557068-69557085	5	17	AAACAAATGATAGTATG	1	intergenic_variant	-	3	0
PNRC1	12:48339946-48344026	Protein_coding	PNRC1L1	6:13929084-13929100	1	16	TGTCTGTGCCCTTCTT	na	intergenic_variant	-	0	0
PNRC1	12:48339946-48344026	Protein_coding	PNRC1L2	13:23948553-23948570	7	17	GCTTAACTAAGTGTTTT	0	intergenic_variant	-	0	0
PNRC1	12:48339946-48344026	Protein_coding	PNRC1L3	22:37138492-37138507	2	15	CCTGATAATGCTTTT	na	intergenic_variant	-	0	0
PNRC1	12:48339946-48344026	Protein_coding	PNRC1L4	36:29962999-29963017	13	18	AATTAAAAATATATATTA	0	intergenic_variant	-	0	0
POLR1D	25:11952733-11998675	Protein_coding	POLR1DL1	9:56302850-56302866	1	16	TGACTTTTCCTTTTTT	0	5_prime_UTR_variant	LOC102156506	0	0
POLR1E	11:53793324-53808725	Protein_coding	POLR1EL1	1:6424919-6424934	1	15	AATATATTTCTTTTA	na	intergenic_variant	-	2	0
POLR1E	11:53793324-53808725	Protein_coding	POLR1EL2	14:31024461-31024474	1	13	TGCAAGTGCTTTT	0	intron_variant	SOSTDC1	2	0
POLR2D	19:22754118-22774054	Protein_coding	POLR2DL1	10:63384682-63384698	1	16	TATTTGCTCTTTTTTG	na	intergenic_variant	-	18	2
POLR2J	6:7707426-7710882	Protein_coding	POLR2JL1	20:17047828-17047828	3	na		na	intron_variant	CHL1	3	0
POLR3D	25:35011189-35016617	Protein_coding	POLR3DL1	X:87003090-87003107	1	17	GGAAGTTTGTAACTCCT	na	intergenic_variant	-	12	0
POLR3F	24:4715146-4727938	Protein_coding	POLR3FL1	14:45191427-45191445	1	18	CTGCACCCTCCATTCTTG	na	5_prime_UTR_variant	BBS9	3	0
PPA1	4:21145547-21189985	Protein_coding	PPA1L1	16:33949278-33949291	1	13	AAAAGTTTTCTAC	0	intron_variant	RBPMS	26	1
PPHLN1	27:11445893-11590143	Protein_coding	PPHLN1L1	17:27584005-27584020	138	15	GCAAAGTTAAAATTT	4	intergenic_variant	-	8	0
PPIL1	12:5916524-5936276	Protein_coding	PPIL1L1	3:72311757-72311776	69	19	TAGAATCTATCCCAGGGAT	0	intron_variant	N4BP2	24	0
PPIL1	12:5916524-5936276	Protein_coding	PPIL1L2	6:61615353-61615368	2	15	CGTTTCTTCCCTTTA	0	intergenic_variant	-	24	0
PPIL1	12:5916524-5936276	Protein_coding	PPIL1L3	7:11294440-11294456	1	16	AATATTTTAAATGTTA	0	intron_variant	RPS6KC1	24	0
PPIL1	12:5916524-5936276	Protein_coding	PPIL1L4	19:35271837-35271851	1	14	GAAAATTGTGATAG	0	intron_variant	SLC35F5	24	0
PPP1R2	33:30525906-30555415	Protein_coding	PPP1R2L1	11:20308891-20308905	1	14	AAACAAGAGCTTTA	na	intergenic_variant	-	57	1
PPP1R2	33:30525906-30555415	Protein_coding	PPP1R2L2	29:29607743-29608091	1	na		0	intron_variant	LOC111093154	57	1
PPP2CA	11:22388327-22410052	Protein_coding	PPP2CAL1	17:35601832-35601849	5	17	AGGAAATAATATGAAGA	0	intron_variant	ACOXL	29	1
PPP2CB	16:33532703-33567011	Protein_coding	PPP2CBL1	38:13063698-13063715	3	17	TCAGGCATGATTTTCTT	0	intron_variant	SPATA17	26	0
PPP2R5A	7:10502959-10566475	Protein_coding	PPP2R5AL1	21:27330071-27330071	1	na		0	upstream_gene_variant	OR51A6	10	0
PPP2R5A	7:10502959-10566475	Protein_coding	PPP2R5AL2	32:35226713-35226713	2	na		0	intron_variant,non_coding_transcript_variant	LOC111093695	10	0
PPP2R5E	8:37945350-38088322	Protein_coding	PPP2R5EL1	2:66134829-66134829	1	na		0	intergenic_variant	-	1	0
PRDM14	29:19203798-19220149	Protein_coding	PRDM14L1	13:5067905-5067920	6	15	AGTTTCCTCTGTGTT	0	intron_variant	RIMS2	0	0
PRDM14	29:19203798-19220149	Protein_coding	PRDM14L2	32:14146873-14146884	1	11	GGTCAGGTTTT	na	intron_variant	CCSER1	0	0
PRDX1	15:14834009-14855665	Protein_coding	PRDX1L1	2:36290557-36290566	3	9	GGGAAATGG	na	intron_variant	PCDHGA1	74	5
PRDX1	15:14834009-14855665	Protein_coding	PRDX1L2	9:32712489-32712509	2	20	AAAAAAAAACTGTATATTGG	0	intron_variant,non_coding_transcript_variant	LOC106559300	74	5
PRDX1	15:14834009-14855665	Protein_coding	PRDX1L3	13:49254501-49254516	1	15	AGGAATATTAAAATT	0	intron_variant,non_coding_transcript_variant	-	74	5
PRDX1	15:14834009-14855665	Protein_coding	PRDX1L4	21:48915642-48915655	3	13	AAAATAAAATGCA	na	intergenic_variant	-	74	5
PRDX1	15:14834009-14855665	Protein_coding	PRDX1L5	24:14068798-14068950	1	na		0	intron_variant,non_coding_transcript_variant	LOC111092175	74	5
PRDX1	15:14834009-14855665	Protein_coding	PRDX1L6	26:1898506-1898653	2	na		0	downstream_gene_variant	-	74	5
PRDX1	15:14834009-14855665	Protein_coding	PRDX1L7	27:22910497-22910512	1	15	TCCTTGGAAACATCT	na	intron_variant	SOX5	74	5
PRDX1	15:14834009-14855665	Protein_coding	PRDX1L8	27:36767801-36767818	3	17	AAAACTCTCCATAAGTT	0	intron_variant	KLRG1	74	5
PRDX1	15:14834009-14855665	Protein_coding	PRDX1L9	31:21411325-21411342	4	17	AAGGAATACTGCCTTTT	0	intron_variant	APP	74	5
PRDX3	28:29395593-29403745	Protein_coding	PRDX3L1	15:25715530-25715544	38	14	TAGTTGTGCTTTTA	4	intergenic_variant	-	40	0
PRDX3	28:29395593-29403745	Protein_coding	PRDX3L2	34:5679301-5679315	20	14	TCTTCTGCCTCCTT	2	intron_variant,non_coding_transcript_variant	-	40	0
PRDX6	7:25663238-25675855	Protein_coding	PRDX6L1	1:38559093-38559102	3	9	GAGATGATT	na	intergenic_variant	-	39	1
PRELID3B	24:43774582-43784416	Protein_coding	PRELID3BL1	8:61848722-61848739	13	17	TCCCTAGTTTACTTTCC	0	intron_variant	RPS6KA5	6	0
PRELID3B	24:43774582-43784416	Protein_coding	PRELID3BL2	11:56657337-56657352	1	15	AAGAAATAATTATGT	0	intergenic_variant	-	6	0
PRELID3B	24:43774582-43784416	Protein_coding	PRELID3BL3	21:12023269-12023281	24	12	TAAAAATGATTG	0	intron_variant,non_coding_transcript_variant	-	6	0
PREP	12:62709158-62821247	Protein_coding	PREPL1	8:7565459-7565475	9	16	TAAAAATTTCACTGTA	0	intergenic_variant	-	2	0
PREPL	10:46733769-46792465	Protein_coding	PREPLL1	1:9695958-9695983	1	25	TGATCAACATTCTAGAAAAAATAAT	0	intergenic_variant	-	0	0
PRKAG2	16:15521304-15786237	Protein_coding	PRKAG2L1	33:13788106-13788113	1	7	TCATATG	0	intergenic_variant	-	2	0
PRKG2	32:5266435-5365396	Protein_coding	PRKG2L1	12:23823302-23823317	1	15	TAAAATAAAAATAGA	0	intron_variant	DST	0	0
PRKRA	36:22061226-22080324	Protein_coding	PRKRAL1	14:365728-365743	3	15	AATTAAACTATTCTT	na	intergenic_variant	-	4	0
PRPF18	2:22868184-22922647	Protein_coding	PRPF18L1	12:30160989-30161008	86	19	AGGATCAAGCCCTAGGCTG	0	intergenic_variant	-	0	0
PRPF38A	15:8950621-8965205	Protein_coding	PRPF38AL1	4:19830141-19830156	2	15	AGAAAAGAAGGCTGG	0	intron_variant	TET1	33	0
PRPS2	X:9281686-9326551	Protein_coding	PRPS2L1	2:6207098-6207107	3	9	ATTGTTTTT	na	intron_variant	LOC111091106	17	2
PRPS2	X:9281686-9326551	Protein_coding	PRPS2L2	22:22812989-22813000	3	11	CTAGGTGAATA	0	intergenic_variant	-	17	2
PRR3	12:384120-389811	Protein_coding	PRR3L1	1:51986823-51986838	1	15	TGGTGAAAACATTTT	0	intergenic_variant	-	14	0
PRR3	12:384120-389811	Protein_coding	PRR3L10	29:18398644-18398659	3	15	TAAAATCAATATACA	na	intron_variant,non_coding_transcript_variant	LOC102151134	14	0
PRR3	12:384120-389811	Protein_coding	PRR3L11	33:16298943-16298952	3	9	AAGACATAG	na	intron_variant	CD96	14	0
PRR3	12:384120-389811	Protein_coding	PRR3L12	34:35473703-35473720	2	17	TCTAAATGTGCTTGTTT	na	intron_variant	TNIK	14	0
PRR3	12:384120-389811	Protein_coding	PRR3L2	3:16544930-16544945	47	15	TCCTCATAGTTTTTC	0	intergenic_variant	-	14	0
PRR3	12:384120-389811	Protein_coding	PRR3L3	8:8086082-8086095	12	13	AAATTCTTCTTTA	0	intron_variant	LOC100687714	14	0
PRR3	12:384120-389811	Protein_coding	PRR3L4	13:62072649-62072664	116	15	TAAGAAATTTTGCTG	0	intron_variant	AFP	14	0
PRR3	12:384120-389811	Protein_coding	PRR3L5	14:9112123-9112140	2	17	CTTGACCTCGCAACCTT	na	intron_variant	GRM8	14	0
PRR3	12:384120-389811	Protein_coding	PRR3L6	15:38629586-38629601	1	15	TACTGTGCCTTTTTC	na	intron_variant	ANKS1B	14	0
PRR3	12:384120-389811	Protein_coding	PRR3L7	18:6834255-6834273	1	18	TTTTTCTTTCTTTTAGTA	0	intron_variant	HECW1	14	0
PRR3	12:384120-389811	Protein_coding	PRR3L8	18:36625207-36625224	59	17	TAAGAAACAAAAAGGGA	0	intergenic_variant	-	14	0
PRR3	12:384120-389811	Protein_coding	PRR3L9	24:30819934-30819950	1	16	AAGAATAATTTTTCTG	0	intron_variant	PTPRT	14	0
PRR32	X:98039088-98041175	Protein_coding	PRR32L1	8:74251369-74251389	20	20	AACAAGAATGCCAGCACCTG	1	intergenic_variant	-	0	0
PRR32	X:98039088-98041175	Protein_coding	PRR32L2	15:15924313-15924325	7	12	CAAGGGCCCACA	0	intergenic_variant	-	0	0
PRR32	X:98039088-98041175	Protein_coding	PRR32L3	31:4382719-4382731	0	12	TAAATGTAATTT	na	intergenic_variant	-	0	0
PSENEN	1:116887155-116888444	Protein_coding	PSENENL1	27:37141720-37141734	3	14	TGTTTTGACTCATT	na	intron_variant	-	4	0
PSIP1	11:35746064-35788473	Protein_coding	PSIP1L1	33:8966459-8966473	6	14	TGTTTACAAGCTTT	0	intergenic_variant	-	5	0
PSMA1	21:37230253-37243356	Protein_coding	PSMA1L1	3:73548636-73548650	12	14	AAAGACTGGTTATA	0	downstream_gene_variant	TLR1	50	0
PSMA1	21:37230253-37243356	Protein_coding	PSMA1L10	29:32494163-32494180	4	17	AGAAACTACAGGCCAGA	0	intergenic_variant	-	50	0
PSMA1	21:37230253-37243356	Protein_coding	PSMA1L11	30:21379980-21379998	3	18	AGAATATCTTCTGAGTTC	0	intron_variant	RFX7	50	0
PSMA1	21:37230253-37243356	Protein_coding	PSMA1L12	30:33617515-33617532	4	17	TAAAATAAGTCAGAACG	0	intron_variant,non_coding_transcript_variant	-	50	0
PSMA1	21:37230253-37243356	Protein_coding	PSMA1L13	35:22786169-22786189	4	20	AAAAAAATTTCAATTTTTCT	0	downstream_gene_variant	LOC102153227	50	0
PSMA1	21:37230253-37243356	Protein_coding	PSMA1L2	4:7516174-7516193	23	19	CCGCATAAAGGTCTTTTTA	0	intergenic_variant	-	50	0
PSMA1	21:37230253-37243356	Protein_coding	PSMA1L3	6:1706033-1706062	3	29	GGGGTTGGTTTTTATTGTCTTTTTTTTTT	0	intron_variant	CALN1	50	0
PSMA1	21:37230253-37243356	Protein_coding	PSMA1L4	11:26912416-26912433	4	17	GATGCAGTATATTTTAA	0	intron_variant	MLANA	50	0
PSMA1	21:37230253-37243356	Protein_coding	PSMA1L5	16:27371322-27371339	2	17	TGTTTTTATTTAAGTTT	na	upstream_gene_variant	ASH2L	50	0
PSMA1	21:37230253-37243356	Protein_coding	PSMA1L6	19:38566407-38566422	1	15	TAGACTTGTCCCTTA	na	3_prime_UTR_variant	UBXN4	50	0
PSMA1	21:37230253-37243356	Protein_coding	PSMA1L7	20:9432238-9432255	64	17	TACCTCCACTCCCTTTA	0	intergenic_variant	-	50	0
PSMA1	21:37230253-37243356	Protein_coding	PSMA1L8	25:11428709-11428722	1	13	GAGTATACAACAG	0	intron_variant	PAN3	50	0
PSMA1	21:37230253-37243356	Protein_coding	PSMA1L9	26:25948793-25948808	13	15	CACCACCTCAGTTCT	0	intron_variant	-	50	0
PSMA3	8:33616735-33642434	Protein_coding	PSMA3L1	14:31367592-31367609	1	17	CATACTGCTAGTTTTTA	na	intron_variant,non_coding_transcript_variant	-	52	1
PSMA6	8:14010899-14038141	Protein_coding	PSMA6L1	13:4475296-4475309	1	13	AAACCTGCATAGA	na	intergenic_variant	-	48	2
PSMA6	8:14010899-14038141	Protein_coding	PSMA6L2	36:8776968-8776985	1	17	AACAATGTGAATTCTTA	0	intergenic_variant	-	48	2
PSMB3	9:23474476-23484408	Protein_coding	PSMB3L1	2:74063272-74063287	10	15	AAAATCTTTAATATT	0	intron_variant,non_coding_transcript_variant	LOC111093439	46	2
PSMB5	8:3344157-3349921	Protein_coding	PSMB5L1	10:46237188-46237203	13	15	TGTATTTCTAATTCT	1	intron_variant	DYNC2LI1	16	0
PSMC3	18:42212083-42218958	Protein_coding	PSMC3L1	15:35937829-35937843	12	14	TAAATTAAAAAACT	0	intron_variant,non_coding_transcript_variant	LOC102152760	5	1
PSMC5	9:11783422-11787624	Protein_coding	PSMC5L1	2:2366114-2366154	3	40	GAGTTCCATATAACCACAGCCAAATCAAGTTAGCCTAAGT	0	intron_variant	PARD3	15	0
PSMC5	9:11783422-11787624	Protein_coding	PSMC5L2	22:20973277-20973289	3	12	TGAACACTTTCT	0	intergenic_variant	-	15	0
PSMD6	20:27206801-27220059	Protein_coding	PSMD6L1	6:680158-680323	1	na		0	intron_variant	VKORC1L1	3	0
PSME2	8:4137247-4141380	Protein_coding	PSME2L1	9:19526524-19526540	1	16	TGTTTTTTGTTTTTTT	0	intron_variant	DUSP3	24	0
PSME2	8:4137247-4141380	Protein_coding	PSME2L2	9:41201322-41201337	2	15	AAAAAGTGGCAAAGA	na	intergenic_variant	-	24	0
PSME2	8:4137247-4141380	Protein_coding	PSME2L3	10:25838532-25838542	3	10	CAGATGTACT	na	intergenic_variant	-	24	0
PSME2	8:4137247-4141380	Protein_coding	PSME2L4	28:15566293-15566306	5	13	TAAAAAAAATTAA	na	intron_variant	NT5C2	24	0
PSME2	8:4137247-4141380	Protein_coding	PSME2L5	29:25641377-25641422	1	45	AACATAAATTTTGATCATGTTCTCCTTAGCCTGTGCTAAATCTCT	0	intron_variant,non_coding_transcript_variant	LOC111093168	24	0
PSPC1	25:18287827-18361801	Protein_coding	PSPC1L1	14:37079263-37079280	1	17	CATGCAGATTACTTCCA	0	intron_variant	IGF2BP3	5	0
PTBP1	20:57806450-57818435	Protein_coding	PTBP1L1	15:52601779-52601794	3	15	TGTCATTTATTTTAT	na	intergenic_variant	-	14	0
PTBP1	20:57806450-57818435	Protein_coding	PTBP1L2	23:17940123-17940138	8	15	AAGAACGTCAAAATT	0	intergenic_variant	-	14	0
PTBP1	20:57806450-57818435	Protein_coding	PTBP1L3	29:31417276-31417295	51	19	AAAATCAAGAGTCAGATGC	7	intron_variant	RALYL	14	0
PTBP1	20:57806450-57818435	Protein_coding	PTBP1L4	29:34960204-34960227	4	23	AATTAAAAATATTCTTAAATGAG	1	intron_variant,non_coding_transcript_variant	-	14	0
PTGES3	10:885744-903814	Protein_coding	PTGES3L1	20:21308986-21309002	1	16	AAAAAGGCATAGCAAA	0	intron_variant,non_coding_transcript_variant	-	75	0
PTGR2	8:47095405-47120371	Protein_coding	PTGR2L1	9:40516836-40516849	4	13	GGTTTATTATTTT	0	intron_variant	PSMD11	1	0
PTMA	25:43563145-43567987	Protein_coding	PTMAL1	8:6499244-6499247	3	3	ATG	na	intron_variant,non_coding_transcript_variant	LOC106559148	21	4
PTMA	25:43563145-43567987	Protein_coding	PTMAL2	18:34252104-34252122	33	18	TCTAAATGAGCATTGTTG	0	intron_variant	KIAA1549L	21	4
PTMA	25:43563145-43567987	Protein_coding	PTMAL3	22:43169628-43169644	1	16	AAAATCATACTTGTCT	na	intron_variant	GPC5	21	4
PTP4A1	12:27044470-27053181	Protein_coding	PTP4A1L1	8:58150912-58150925	22	13	ATATAAAAAAGTG	1	intron_variant,non_coding_transcript_variant	-	136	3
PTP4A1	12:27044470-27053181	Protein_coding	PTP4A1L2	12:65323947-65324132	22	na		0	intron_variant	AFG1L	136	3
PTP4A1	12:27044470-27053181	Protein_coding	PTP4A1L3	23:19796004-19796019	3	15	AGTGAATCAGAATCT	0	intergenic_variant	-	136	3
PTP4A1	12:27044470-27053181	Protein_coding	PTP4A1L4	33:5059929-5059946	15	17	CCACTCTCACTACTTTC	1	intergenic_variant	-	136	3
PTS	5:20883128-20912318	Protein_coding	PTSL1	5:14818946-14818962	3	16	CTGCCCTTCCCCTTCT	0	downstream_gene_variant	LOC102152874	31	2
PTTG1	4:50301868-50309636	Protein_coding	PTTG1L1	X:89042709-89042712	3	3	CAA	na	intron_variant,non_coding_transcript_variant	LOC111094844	35	0
PUM3	1:91391619-91436378	Protein_coding	PUM3L1	2:6287376-6287580	1	na		0	intron_variant	-	0	0
PUM3	1:91391619-91436378	Protein_coding	PUM3L2	21:29068278-29068298	1	20	AAGAAATCTGTAAGAATGAG	na	intron_variant	cOR52E4	0	0
PXK	20:32138320-32272767	Protein_coding	PXKL1	25:31861759-31861774	2	15	CTGAAAGTTCTTTTG	na	intergenic_variant	-	1	0
PYM1	10:251493-266996	Protein_coding	PYM1L1	8:18713823-18713841	3	18	AAAAAATGACAAATTTTA	0	upstream_gene_variant	-	0	0
QTRT2	33:18317322-18341962	Protein_coding	QTRT2L1	X:21328045-21328061	2	16	TAAAATGTAGACAATA	0	intron_variant	LOC491786	0	0
RAB10	17:20181363-20264927	Protein_coding	RAB10L1	14:22204789-22204988	1	na		na	intron_variant	DLX6	4	0
RAB11A	30:30200831-30218412	Protein_coding	RAB11AL1	11:18096639-18096657	1	18	TGTTTAAAAAAATTCTTG	na	intron_variant,non_coding_transcript_variant	LOC111098014	16	0
RAB18	2:6071944-6112064	Protein_coding	RAB18L1	20:10254830-10254845	2	15	ATAAAAGTTGAGATA	0	intron_variant	GRM7	15	0
RAB1B	18:51026975-51034356	Protein_coding	RAB1BL1	16:13805922-13805937	1	15	TGCCTTGAACCTTTG	0	intron_variant	PGBD2	11	0
RAB28	3:66601543-66738055	Protein_coding	RAB28L1	22:18775970-18775990	1	20	TTTGCTTCTCTTTGACAGCC	na	intron_variant,non_coding_transcript_variant	-	31	0
RAB2A	29:10953425-11042789	Protein_coding	RAB2AL1	7:39588793-39588810	3	17	TTTGAATGTAATGTTCT	na	intron_variant	DNAH14	12	1
RAB2A	29:10953425-11042789	Protein_coding	RAB2AL2	37:14337875-14337891	1	16	GGCAGAGATGTTTTTT	0	intron_variant	NRP2	12	1
RAB2B	15:18494417-18512144	Protein_coding	RAB2BL1	16:22687945-22687963	1	18	CTAAAACTATAAAACTTG	na	upstream_gene_variant	HGSNAT	12	1
RAB3A	20:44796740-44802224	Protein_coding	RAB3AL1	37:22268442-22268460	3	18	AATGATAAATATGTTTTA	na	intron_variant	ABCA12	0	0
RAB3IP	10:11673749-11714282	Protein_coding	RAB3IPL1	10:35641992-35642017	1	25	GAAAGTTCCTTAATCTATTATTTTT	0	intron_variant	SULT1C3	0	0
RAB4A	4:9914681-9965468	Protein_coding	RAB4AL1	16:8966447-8966460	1	13	AATTCACCGGGGC	na	intron_variant	TBXAS1	11	0
RABL3	33:24107754-24151378	Protein_coding	RABL3L1	22:21409102-21409111	1	9	CTGGTAGGG	0	intron_variant	PCDH9	0	0
RAC1	6:11726259-11757207	Protein_coding	RAC1L1	4:7690088-7690104	62	16	TAACAATCCCCCTGGA	0	intron_variant	DISC1	39	1
RACK1	11:426734-431087	Protein_coding	RACK1L1	28:10192468-10192468	4	na		0	upstream_gene_variant	LCOR	6	0
RAD17	2:54407184-54437676	Protein_coding	RAD17L1	33:22925933-22925950	13	17	TAAAATATGCCAACCCC	0	upstream_gene_variant	B4GALT4	4	0
RAD51AP1	27:40303935-40341666	Protein_coding	RAD51AP1L1	19:5732974-5732985	2	11	AACAGATAGGA	0	intergenic_variant	-	4	0
RAN	26:1435077-1436893	Protein_coding	RANL1	1:60178328-60178345	4	17	CACAAAGCTTTCACTTA	0	intergenic_variant	-	126	6
RAN	26:1435077-1436893	Protein_coding	RANL2	5:62142636-62142650	3	14	AAAACCACCATAGG	0	intron_variant	RERE	126	6
RAN	26:1435077-1436893	Protein_coding	RANL3	30:11293515-11293535	3	20	AAAGAAGAGTTTTATTTTTT	na	intron_variant	SPG11	126	6
RAN	26:1435077-1436893	Protein_coding	RANL4	X:38699450-38699463	1	13	AAATATTAGATCA	0	intron_variant,non_coding_transcript_variant	-	126	6
RARS1	4:43237499-43260738	Protein_coding	RARS1L1	4:23077411-23077428	3	17	TAAAACACTGTAATGAG	na	intron_variant	MICU1	2	0
RASGEF1B	32:5545489-6090119	Protein_coding	RASGEF1BL1	7:28549311-28549328	1	17	TAATTCCCATAATTTAA	0	upstream_gene_variant	NTMT2	1	0
RASGRP4	1:114584535-114598870	Protein_coding	RASGRP4L1	20:27819337-27819353	11	16	AATAAACACATTGAGG	0	intron_variant	SYNPR	0	0
RASSF3	10:7323272-7349593	Protein_coding	RASSF3L1	32:13854674-13854690	1	16	TTTTTTTTTTTTTTTT	0	intron_variant	CCSER1	2	0
RBBP4	2:68638459-68660942	Protein_coding	RBBP4L1	35:18636569-18636589	36	20	AAATAAGTTTTCTGCCCCTG	0	intergenic_variant	-	73	1
RBM11	31:11204273-11217450	Protein_coding	RBM11L1	16:45073361-45073363	10	2	TT	0	intergenic_variant	-	2	0
RBM17	2:29828720-29853922	Protein_coding	RBM17L1	36:899789-899804	1	15	GAAATATAGTCACCA	0	intron_variant	GALNT13	14	1
RBMS1	36:5978146-6118409	Protein_coding	RBMS1L1	1:18635893-18635909	2	16	CATCACGTCAAAGGTT	na	intergenic_variant	-	2	0
RBMS2	10:738215-829965	Protein_coding	RBMS2L1	15:9040226-9040241	1	15	ATCTTGCTAGATCTT	0	intron_variant	TUT4	11	0
RBP7	5:63163201-63180338	Protein_coding	RBP7L1	3:28308128-28308133	1	5	CCCAC	0	intron_variant	SCAMP1	2	1
RCBTB2	22:3018628-3051059	Protein_coding	RCBTB2L1	X:10588809-10588824	2	15	TAAAACCTATAGGGA	0	intergenic_variant	-	2	0
RCC1	2:71948159-71964353	Protein_coding	RCC1L1	6:978309-978324	10	15	AAGAACTGTCAACTC	1	intron_variant	TPST1	10	0
RCHY1	32:67136-94053	Protein_coding	RCHY1L1	X:45330752-45330770	5	18	TAAAATGAATCCTTATGG	na	intron_variant	HUWE1	8	1
RDH10	29:21886014-21912451	Protein_coding	RDH10L1	6:72957846-72957847	1	1	G	0	intergenic_variant	-	0	0
REST	13:49041082-49062596	Protein_coding	RESTL1	12:36658275-36658284	19	9	GAAGTTACC	0	intron_variant	COL12A1	0	0
REST	13:49041082-49062596	Protein_coding	RESTL2	17:8860592-8860608	1	16	TGTTTTTTTTTTCTTT	0	downstream_gene_variant	LOC111090416	0	0
RETREG3	9:20363729-20385580	Protein_coding	RETREG3L1	37:18523374-18523393	13	19	ACAAAAATACATCACATTT	0	intergenic_variant	-	0	0
REXO2	5:18919283-18929899	Protein_coding	REXO2L1	6:69994189-69994205	13	16	TAAAATTATGTTTCTA	0	intergenic_variant	-	6	0
RFK	1:82062290-82071033	Protein_coding	RFKL1	12:25695220-25695236	1	16	AAAAAATTCATGTTCA	na	intron_variant	KHDRBS2	85	0
RFTN2	37:7074597-7140623	Protein_coding	RFTN2L1	5:75456000-75456004	2	4	TCTT	0	downstream_gene_variant	-	1	0
RGN	X:40697292-40715491	Protein_coding	RGNL1	10:46165704-46165748	1	44	GGGAAGTAGCACATGTGAGGAAATAATGAGCCATGGAAGACAGA	na	intron_variant	PLEKHH2	14	1
RHEB	16:15439910-15483489	Protein_coding	RHEBL1	9:27506566-27506581	4	15	TTCGTAGTCTTTTTA	0	intron_variant	CA10	22	0
RHOA	20:39824552-39887215	Protein_coding	RHOAL1	21:29494802-29494818	1	16	GATAAATTTCCTTTTA	na	intergenic_variant	-	94	2
RHOA	20:39824552-39887215	Protein_coding	RHOAL2	25:36379230-36379233	2	3	AAG	na	intergenic_variant	-	94	2
RHOU	4:10395033-10406239	Protein_coding	RHOUL1	13:7048169-7048175	1	6	CTACTT	0	intergenic_variant	-	0	0
RIOK2	3:12548830-12571312	Protein_coding	RIOK2L1	8:7848875-7848889	1	14	AAAGCACATAGGCA	0	intron_variant,non_coding_transcript_variant	-	2	0
RNASEH1	17:2117446-2127893	Protein_coding	RNASEH1L1	34:11351605-11351620	2	15	TAAATACCCATTACC	na	intergenic_variant	-	11	0
RND2	9:20037469-20041044	Protein_coding	RND2L1	7:21531226-21531244	45	18	TAGGAACTCCTGGCTGTG	0	intron_variant	RASAL2	6	0
RNF114	24:36466704-36483895	Protein_coding	RNF114L1	7:38133440-38133450	1	10	TTAACCTGAA	na	intergenic_variant	-	13	0
RNF138	7:57521416-57554793	Protein_coding	RNF138L1	29:15143434-15143452	1	18	CCTAAGTTCCTATTCTTA	0	intron_variant,non_coding_transcript_variant	-	28	0
RNF138	7:57521416-57554793	Protein_coding	RNF138L2	32:8562287-8562306	1	19	GAAATATAGTGCTTCAGAA	na	intron_variant	WDFY3	28	0
RNF168	33:29542209-29575127	Protein_coding	RNF168L1	31:15382482-15382495	1	13	AAAGGAATATTGC	0	intergenic_variant	-	3	0
RNF2	7:18240672-18283091	Protein_coding	RNF2L1	31:5244534-5244548	3	14	CTGATGTTCTTTTC	na	intron_variant,non_coding_transcript_variant	-	34	0
RNF7	23:37578222-37584862	Protein_coding	RNF7L1	28:6903175-6903191	2	16	TAACCTATCTTCTATT	na	intron_variant	IDE	36	1
RNFT1	9:34430119-34442760	Protein_coding	RNFT1L1	33:12598001-12598016	6	15	TAAATGTAGGAAGGA	1	intergenic_variant	-	5	0
RNH1	18:25604736-25614602	Protein_coding	RNH1L1	1:115127184-115127201	1	17	AAAAAAAAAAAAAAAAG	0	intron_variant	LOC100686288	6	0
RNPS1	6:38719713-38729437	Protein_coding	RNPS1L1	13:50137966-50138204	9	na		0	intergenic_variant	-	54	1
RPA1	9:45958566-46034850	Protein_coding	RPA1L1	4:50299316-50299327	5	11	AATGAGCTGCG	na	intron_variant	-	125	0
RPA1	9:45958566-46034850	Protein_coding	RPA1L2	24:39565761-39565772	2	11	GGGTCATTTTC	0	upstream_gene_variant	-	125	0
RPF2	12:67516991-67566280	Protein_coding	RPF2L1	6:54049148-54049164	1	16	AAAAATCAGTTGTGAG	na	intron_variant,non_coding_transcript_variant	-	36	2
RPF2	12:67516991-67566280	Protein_coding	RPF2L2	14:42429050-42429050	1	na		0	intron_variant	CHN2	36	2
RPF2	12:67516991-67566280	Protein_coding	RPF2L3	24:40725515-40725526	1	11	TAAAAAAAAAA	0	intron_variant,non_coding_transcript_variant	-	36	2
RPL10	X:122098020-122100719	Protein_coding	RPL10L1	3:32009305-32009323	30	18	TAAAATCTGGGAAGTACA	1	intron_variant	NIPA1	238	0
RPL10	X:122098020-122100719	Protein_coding	RPL10L2	9:48314983-48314998	14	15	AAGAAGCAACAGGGG	0	intron_variant	NOXA1	238	0
RPL10	X:122098020-122100719	Protein_coding	RPL10L3	20:1496439-1496455	1	16	AAGAAACAAGATTCAC	0	intron_variant	-	238	0
RPL10	X:122098020-122100719	Protein_coding	RPL10L4	21:21226015-21226029	2	14	AAAACCCCTCACCC	0	intergenic_variant	-	238	0
RPL11	2:75781210-75785614	Protein_coding	RPL11L1	27:36997416-36997416	1	na		0	intron_variant	RIMKLB	112	3
RPL11	2:75781210-75785614	Protein_coding	RPL11L2	32:21814994-21815012	3	18	TCAAAATCAACAGACATT	na	downstream_gene_variant	DAPP1	112	3
RPL12	9:55894942-55898816	Protein_coding	RPL12L1	6:41148114-41148127	16	13	CTATTTTTTTCTT	0	downstream_gene_variant	-	457	31
RPL12	9:55894942-55898816	Protein_coding	RPL12L2	15:16088955-16088971	2	16	TAAAATGGGCAAAGAG	0	upstream_gene_variant	DMAP1	457	31
RPL12	9:55894942-55898816	Protein_coding	RPL12L3	27:18247208-18247224	1	16	GCTATCCTGTTTCTTA	na	intron_variant	TMTC1	457	31
RPL13A	1:107010190-107014267	Protein_coding	RPL13AL1	7:77545094-77545106	145	12	TTAAAGATTGGG	2	upstream_gene_variant	MPPE1	139	3
RPL13A	1:107010190-107014267	Protein_coding	RPL13AL2	8:37363763-37363778	1	15	AACATTCTATAGCTG	0	intergenic_variant	-	139	3
RPL14	23:9907479-9911114	Protein_coding	RPL14L1	23:50399073-50399090	1	17	CTCAGTTAAATTTCTTA	na	intron_variant	LEKR1	79	1
RPL15	23:19825622-19829781	Protein_coding	RPL15L1	11:19645346-19645362	1	16	AATATTTTAATATTTT	0	intron_variant	CDC42SE2	194	5
RPL15	23:19825622-19829781	Protein_coding	RPL15L2	17:33754784-33754802	12	18	TAAATAAATAAAATCTTT	0	intergenic_variant	-	194	5
RPL15	23:19825622-19829781	Protein_coding	RPL15L3	22:3874050-3874065	2	15	CCAGAATAATATTTA	0	intergenic_variant	-	194	5
RPL18	1:107690021-107694586	Protein_coding	RPL18L1	6:18158393-18158405	1	12	CAAAACCGAATT	0	intron_variant,non_coding_transcript_variant	-	265	7
RPL18	1:107690021-107694586	Protein_coding	RPL18L2	7:38906308-38906321	3	13	TAAAGGCAGTAAG	na	downstream_gene_variant	-	265	7
RPL18	1:107690021-107694586	Protein_coding	RPL18L3	13:6922964-6922978	6	14	AAATCTCAGGTGGA	na	intron_variant,non_coding_transcript_variant	LOC102153110	265	7
RPL18	1:107690021-107694586	Protein_coding	RPL18L4	14:20148143-20148159	10	16	TTGCCCTGGAGTTTAC	0	intron_variant,non_coding_transcript_variant	LOC111098668	265	7
RPL24	33:8018183-8023779	Protein_coding	RPL24L1	13:48871746-48871753	1	7	AAATTTA	na	intron_variant,non_coding_transcript_variant	LOC102152627	265	7
RPL27	9:20063524-20066915	Protein_coding	RPL27L1	7:47395750-47395764	9	14	TAAAATTATTTTTA	0	intron_variant,non_coding_transcript_variant	LOC111096757	268	6
RPL27	9:20063524-20066915	Protein_coding	RPL27L2	7:70599838-70599853	3	15	TAAGAACAGAATAAG	na	intron_variant	DLGAP1	265	7
RPL27	9:20063524-20066915	Protein_coding	RPL27L3	21:37321103-37321118	5	15	TGCAACACTATTTTT	0	intron_variant	-	268	6
RPL27	9:20063524-20066915	Protein_coding	RPL27L4	36:2683590-2683621	15	31	TGATCTGCGTTTTTATGTTTTTTTTTTTTTT	0	intron_variant	GPD2	268	6
RPL28	1:102301856-102304949	Protein_coding	RPL28L1	15:36646946-36646961	2	15	TATAAAAAGTATTTT	0	intergenic_variant	-	81	8
RPL28	1:102301856-102304949	Protein_coding	RPL28L2	22:37743769-37743782	174	13	AAGGACCATCCTG	na	intergenic_variant	-	81	8
RPL3	10:25739089-25745487	Protein_coding	RPL3L1	18:30712411-30712411	1	na		0	intergenic_variant	-	340	1
RPL3	10:25739089-25745487	Protein_coding	RPL3L2	X:102430613-102430619	1	6	AATTAG	0	intergenic_variant	-	340	1
RPL30	13:301263-304854	Protein_coding	RPL30L1	3:27323303-27323319	1	16	AGAAAGCAAAGAAAGG	na	intron_variant	TENT2	179	0
RPL30	13:301263-304854	Protein_coding	RPL30L2	3:72390484-72390500	3	16	AAAAGAAGTTATTCCC	0	intron_variant	N4BP2	179	0
RPL30	13:301263-304854	Protein_coding	RPL30L3	9:25615508-25615525	1	17	GGTAGCTCTCTGTTTAG	na	intron_variant	NGFR	179	0
RPL30	13:301263-304854	Protein_coding	RPL30L4	18:53852421-53852437	1	16	TTTTTTTAAGATTTTT	na	downstream_gene_variant	LOC100688091	179	0
RPL35	9:58153433-58158597	Protein_coding	RPL35L1	2:20980833-20980852	4	19	TAAAAAAGTGATCTTTCTT	0	intron_variant	MINDY3	153	7
RPL35	9:58153433-58158597	Protein_coding	RPL35L2	8:49757979-49757996	5	17	TAGAAGGAGGAGTGTCA	0	intergenic_variant	-	153	7
RPL35	9:58153433-58158597	Protein_coding	RPL35L3	16:23812424-23812434	10	10	AAGAAAGGGG	0	intron_variant	ANK1	153	7
RPL35A	33:28741796-28745043	Protein_coding	RPL35AL1	4:32683505-32683521	3	16	CAGGATTCTTTTTCTT	na	intron_variant	CCSER2	0	0
RPL35A	33:28741796-28745043	Protein_coding	RPL35AL2	5:40278454-40278464	4	10	TGCTTGGGAT	0	intron_variant	AKAP10	0	0
RPL35A	33:28741796-28745043	Protein_coding	RPL35AL3	5:60558546-60558562	2	16	GACTTTTAAGATTGTT	0	intergenic_variant	-	0	0
RPL35A	33:28741796-28745043	Protein_coding	RPL35AL4	10:7737997-7738006	1	9	GCTTTTTTT	0	intergenic_variant	-	0	0
RPL35A	33:28741796-28745043	Protein_coding	RPL35AL5	12:3923754-3923771	1	17	GAAATCTTTAAGGATGA	0	intron_variant	ILRUN	0	0
RPL35A	33:28741796-28745043	Protein_coding	RPL35AL6	16:53691314-53691328	3	14	TATAGGATTAATTT	0	intergenic_variant	-	0	0
RPL35A	33:28741796-28745043	Protein_coding	RPL35AL7	26:14657134-14657148	14	14	TTAAACAGGAATGA	0	intron_variant	TAOK3	0	0
RPL36	20:54334256-54335169	Protein_coding	RPL36L1	4:75420952-75420956	1	4	CCTG	0	intron_variant	PDZD2	262	0
RPL36	20:54334256-54335169	Protein_coding	RPL36L2	6:6712596-6712598	1	2	CC	na	intron_variant	BAZ1B	262	0
RPL36	20:54334256-54335169	Protein_coding	RPL36L3	7:80879114-80879129	6	15	TCGTAGATGGCTTTT	0	intergenic_variant	-	262	0
RPL36	20:54334256-54335169	Protein_coding	RPL36L4	11:55042456-55042471	3	15	GAGGCCAATGCTCTT	na	intron_variant,non_coding_transcript_variant	LOC111098101	262	0
RPL36	20:54334256-54335169	Protein_coding	RPL36L5	24:33602125-33602137	1	12	AAACATTGGAGA	0	intron_variant	ELMO2	262	0
RPL36	20:54334256-54335169	Protein_coding	RPL36L6	29:266523-266539	1	16	TGAAAGGGACAGTGGC	0	intergenic_variant	-	262	0
RPL37A	37:23427603-23429545	Protein_coding	RPL37AL1	9:44472642-44472659	48	17	ATAAGAAACTATTTTGA	0	downstream_gene_variant	CPD	283	0
RPL5	6:56207171-56216030	Protein_coding	RPL5L1	8:41884625-41884640	1	15	CCCACGTTGGTTTTC	na	intron_variant	RAD51B	179	4
RPL5	6:56207171-56216030	Protein_coding	RPL5L2	14:11391015-11391030	6	15	AAAATTGGTTTCGGG	0	intron_variant,non_coding_transcript_variant	-	179	4
RPL6	26:9970416-9975897	Protein_coding	RPL6L1	4:3742629-3742648	1	19	ATCAATCAATCTTTTTTTA	0	intron_variant	ERO1B	790	1
RPL7	29:21881048-21884401	Protein_coding	RPL7L1	3:1779645-1779660	2	15	AAATCCATGGAACTA	0	intron_variant	TMEM232	743	28
RPL7	29:21881048-21884401	Protein_coding	RPL7L10	X:95034447-95034465	1	18	GCACATTTAATACTTTTG	0	intergenic_variant	-	743	28
RPL7	29:21881048-21884401	Protein_coding	RPL7L2	3:63425439-63425457	2	18	ACCTTTCCATTCTCTTAT	0	intron_variant,non_coding_transcript_variant	-	743	28
RPL7	29:21881048-21884401	Protein_coding	RPL7L3	11:49095815-49095829	1	14	AATCCTTTGTTTGT	0	intergenic_variant	-	743	28
RPL7	29:21881048-21884401	Protein_coding	RPL7L4	14:43446755-43446770	2	15	GAAATACATACTCTT	0	intergenic_variant	-	743	28
RPL7	29:21881048-21884401	Protein_coding	RPL7L5	16:27516373-27516390	3	17	CTTATGTGAGGACTTTT	na	intron_variant	RAB11FIP1	743	28
RPL7	29:21881048-21884401	Protein_coding	RPL7L6	19:8414199-8414215	3	16	AAAAAATGAACTAATG	na	intergenic_variant	-	743	28
RPL7	29:21881048-21884401	Protein_coding	RPL7L7	24:13968762-13968774	1	12	AAACATTTTTCT	0	intron_variant	PLCB1	743	28
RPL7	29:21881048-21884401	Protein_coding	RPL7L8	32:28769962-28769980	2	18	AAAATAAGTCAATCAGGG	na	intron_variant,non_coding_transcript_variant	LOC100687917	743	28
RPL7	29:21881048-21884401	Protein_coding	RPL7L9	X:39989038-39989054	5	16	TAGAAAATCTGAAAGA	0	intron_variant,non_coding_transcript_variant	-	743	28
RPL7A	9:49783635-49786328	Protein_coding	RPL7AL1	7:61585502-61585519	15	17	TCAAAATCAGTTATCAG	0	intron_variant	CHST9	274	36
RPL7A	9:49783635-49786328	Protein_coding	RPL7AL2	8:39105751-39105767	3	16	GGAATCCAAGATTTTC	na	intron_variant	PLEKHG3	274	36
RPL7A	9:49783635-49786328	Protein_coding	RPL7AL3	15:46433439-46433456	99	17	TCTGGGTAACCTTTTTG	0	intron_variant	NR3C2	274	36
RPL7A	9:49783635-49786328	Protein_coding	RPL7AL4	18:43264950-43264968	5	18	ATCAATTGAAAGAGAATT	0	intron_variant,non_coding_transcript_variant	-	274	36
RPL7L1	12:11445225-11451147	Protein_coding	RPL7L1L1	1:374033-374048	1	15	CATAACAGTATTTCC	0	intergenic_variant	-	163	4
RPL7L1	12:11445225-11451147	Protein_coding	RPL7L1L2	6:32647906-32647906	2	na		0	intron_variant	GRIN2A	163	4
RPL7L1	12:11445225-11451147	Protein_coding	RPL7L1L3	14:19624729-19624737	1	8	ATCTTTTT	na	intergenic_variant	-	163	4
RPL7L1	12:11445225-11451147	Protein_coding	RPL7L1L4	22:34454759-34454777	9	18	GAACATTACTAAAGTTTT	0	intron_variant,non_coding_transcript_variant	LOC111091669	163	4
RPL7L1	12:11445225-11451147	Protein_coding	RPL7L1L5	35:4183337-4183358	3	21	TTTAAAAAATCTACAGTGATG	na	intergenic_variant	-	163	4
RPL8	13:38101879-38104772	Protein_coding	RPL8L1	17:10327630-10327694	1	na		0	intergenic_variant	-	42	1
RPL9	3:72989526-72993944	Protein_coding	RPL9L1	11:62302367-62302367	1	na		0	intergenic_variant	-	390	28
RPL9	3:72989526-72993944	Protein_coding	RPL9L2	14:46195174-46195288	10	na		0	intron_variant,non_coding_transcript_variant	-	390	28
RPLP0	26:16148463-16153614	Protein_coding	RPLP0L1	12:36151275-36151290	1	15	TAATTAATATTTTAA	na	intergenic_variant	-	98	5
RPLP1	30:33342099-33346541	Protein_coding	RPLP1L1	29:33737716-33737733	1	17	TAACAGGGATTTTTATA	na	intergenic_variant	-	139	0
RPLP2	18:45176539-45178270	Protein_coding	RPLP2L1	27:1799680-1799696	1	16	GGGAAAGAGATTTTTA	na	downstream_gene_variant	SP1	65	1
RPP30	28:5535257-5562571	Protein_coding	RPP30L1	18:35783148-35783162	3	14	AAGATCTAATTTTT	0	intron_variant	ELP4	2	0
RPP30	28:5535257-5562571	Protein_coding	RPP30L2	38:17587778-17587794	2	16	AGATCTTTATAAATTA	0	intron_variant	TMCO1	2	0
RPRD1B	24:26552487-26604586	Protein_coding	RPRD1BL1	7:27755320-27755333	2	13	AGTGGAGTATCTA	na	intron_variant	FMO3	1	0
RPS13	21:39685453-39688915	Protein_coding	RPS13L1	13:705399-705415	3	16	AAAAATTTTTGAGCTT	0	intron_variant	STK3	148	0
RPS14	4:58661335-58667968	Protein_coding	RPS14L1	5:5195187-5195202	2	15	TAACTGTTTACTCCT	0	intergenic_variant	-	120	2
RPS15	20:57406544-57407015	Protein_coding	RPS15L1	11:22049003-22049017	7	14	GTAGATTTCCTCTT	0	intron_variant,non_coding_transcript_variant	-	610	0
RPS16	1:113795239-113798380	Protein_coding	RPS16L1	3:26720828-26720840	11	12	ACTTCAGAACAG	0	intergenic_variant	-	129	6
RPS16	1:113795239-113798380	Protein_coding	RPS16L2	9:26032523-26032536	1	13	AAAAAAGACTGGA	0	intergenic_variant	-	129	6
RPS18	12:2712958-2718657	Protein_coding	RPS18L1	5:60615769-60615787	7	18	TCTGGGAGTCTTAATATT	0	intron_variant	CAMTA1	288	7
RPS18	12:2712958-2718657	Protein_coding	RPS18L2	X:49860415-49860428	3	13	GAAAAGAAAAAGA	na	intergenic_variant	-	288	7
RPS20	29:7488481-7489850	Protein_coding	RPS20L1	5:63213673-63213688	1	15	CACAATTCCACTTAT	na	upstream_gene_variant	UBE4B	342	20
RPS20	29:7488481-7489850	Protein_coding	RPS20L2	11:50031459-50031459	1	na		0	intergenic_variant	-	342	20
RPS20	29:7488481-7489850	Protein_coding	RPS20L3	11:66592775-66592790	2	15	GCCTAGATAGTTTTT	0	intron_variant	SUSD1	342	20
RPS20	29:7488481-7489850	Protein_coding	RPS20L4	18:50427937-50428119	1	na		na	intron_variant	PC	342	20
RPS20	29:7488481-7489850	Protein_coding	RPS20L5	24:34435278-34435292	6	14	AACCCCACTGATGT	0	intron_variant	ZMYND8	342	20
RPS20	29:7488481-7489850	Protein_coding	RPS20L6	26:2288692-2288692	1	na		0	intron_variant	TMEM132D	342	20
RPS21	24:46361607-46362315	Protein_coding	RPS21L1	4:83156271-83156287	36	16	AAAATACAACTCTGGG	0	intergenic_variant	-	72	4
RPS21	24:46361607-46362315	Protein_coding	RPS21L2	27:23378205-23378221	1	16	TATATTACCACTTTAA	na	intron_variant	SOX5	72	4
RPS25	5:14833804-14836376	Protein_coding	RPS25L1	30:10964105-10964121	4	16	TAAAACTTCATGGAGG	0	intergenic_variant	-	188	3
RPS26	10:362699-364406	Protein_coding	RPS26L1	4:36300609-36300625	12	16	AAATAAATAAAATCTT	0	intron_variant	ZNF346	118	0
RPS27	7:43149465-43150658	Protein_coding	RPS27L1	7:28853659-28853676	1	17	AAAATTGAGACACTTGA	na	downstream_gene_variant	-	268	0
RPS27	7:43149465-43150658	Protein_coding	RPS27L2	17:36854968-36854981	2	13	GAATAATATTTCA	0	intergenic_variant	-	268	0
RPS27	7:43149465-43150658	Protein_coding	RPS27L3	23:25144487-25144507	1	20	TAAAATCACTAAGAAAAAGA	na	intergenic_variant	-	268	0
RPS27A	10:56132924-56135327	Protein_coding	RPS27AL1	22:27110182-27110198	1	16	AGAATACTGTGCATAA	0	intron_variant	PIBF1	264	3
RPS27A	10:56132924-56135327	Protein_coding	RPS27AL2	30:7723592-7723609	2	17	AAAAACGATTATTTTGA	na	intron_variant	CCDC32	264	3
RPS3	21:23180515-23187034	Protein_coding	RPS3L1	13:32153075-32153092	2	17	TAAAATAAGTCATCTCT	0	intergenic_variant	-	534	2
RPS3	21:23180515-23187034	Protein_coding	RPS3L2	26:7528866-7528882	27	16	AAATAATAAGACCCAG	0	intron_variant	TMEM120B	534	2
RPS4X	X:56290914-56296267	Protein_coding	RPS4XL1	1:117736772-117737048	2	na		na	intron_variant	-	290	0
RPS4X	X:56290914-56296267	Protein_coding	RPS4XL2	28:33892323-33892325	3	2	TT	na	intron_variant	LHPP	290	0
RPS4X	X:56290914-56296267	Protein_coding	RPS4XL3	34:16997851-16997864	3	13	AAAGAATTTATCA	na	intergenic_variant	-	290	0
RPS5	1:99558769-99564393	Protein_coding	RPS5L1	17:42312545-42312563	45	18	ATGAAAGAATCTGATTCA	2	intergenic_variant	-	56	1
RPS7	17:2139011-2143160	Protein_coding	RPS7L1	17:37655787-37655803	1	16	TAAAATTGTCATCGTT	0	intron_variant	-	127	1
RPS7	17:2139011-2143160	Protein_coding	RPS7L2	34:27850198-27850206	1	8	TATTTTGA	0	intergenic_variant	-	127	1
RPS8	15:15542569-15545285	Protein_coding	RPS8L1	32:4626430-4626445	2	15	CTCATCAAATATGTT	na	intron_variant	CFAP299	163	8
RPS9	1:102989338-102995755	Protein_coding	RPS9L1	21:3423016-3423031	3	15	TAAACACCACATCTC	na	intergenic_variant	-	33	1
RPUSD3	20:8406549-8414029	Protein_coding	RPUSD3L1	15:11771359-11771370	3	11	CAGATACAATT	na	intron_variant	AGBL4	1	0
RRAS2	21:37037576-37119733	Protein_coding	RRAS2L1	1:115636348-115636364	6	16	AATGATTTGTATTACC	1	intergenic_variant	-	32	0
RRM2	17:7106515-7113868	Protein_coding	RRM2L1	7:56576919-56576934	1	15	ATAAAAGTACTGTTT	0	intron_variant	CCDC178	36	1
RRM2	17:7106515-7113868	Protein_coding	RRM2L2	10:61064595-61064611	236	16	TAAGATGCCACTTTTC	na	intron_variant	PUS10	36	1
RRM2	17:7106515-7113868	Protein_coding	RRM2L3	15:60390483-60390498	8	15	TTGAGGACGTGTTTT	0	intergenic_variant	-	36	1
RRM2	17:7106515-7113868	Protein_coding	RRM2L4	16:42585190-42585206	2	16	TATGCATTCATCTATT	0	intron_variant,non_coding_transcript_variant	-	36	1
RRM2	17:7106515-7113868	Protein_coding	RRM2L5	35:18266086-18266099	3	13	CAATCTCACTTTC	0	intron_variant,non_coding_transcript_variant	LOC102156827	36	1
RRP15	38:13377518-13416809	Protein_coding	RRP15L1	1:85129283-85129294	1	11	AATAGGCACAG	0	intron_variant	TMC1	4	0
RRP7A	10:22882662-22892301	Protein_coding	RRP7AL1	28:3023114-3023131	1	17	AAAAGTGTTTGGGTAGC	na	intron_variant,non_coding_transcript_variant	-	1	0
RSL24D1	30:20610526-20628202	Protein_coding	RSL24D1L1	9:14269046-14269060	3	14	AGCACCCGACTCTT	0	intron_variant	CEP112	146	1
RSL24D1	30:20610526-20628202	Protein_coding	RSL24D1L2	36:26492448-26492925	1	na		0	intergenic_variant	-	146	1
RTCA	6:49711984-49746472	Protein_coding	RTCAL1	31:25246930-25246948	29	18	TCAGTATAAATTAAATCT	0	intergenic_variant	-	20	0
RTCA	6:49711984-49746472	Protein_coding	RTCAL2	32:17053554-17053569	2	15	AGGTCTCAGTTTTAT	na	intron_variant,non_coding_transcript_variant	LOC106558143	20	0
RTCB	10:31010841-31034208	Protein_coding	RTCBL1	12:65804487-65804504	2	17	AAAATAAAATAAAATCA	0	intron_variant,non_coding_transcript_variant	LOC111098390	2	2
RTRAF	8:28224365-28239368	Protein_coding	RTRAFL1	28:21486029-21486046	1	17	CATCACATAGCTTTTTG	na	intron_variant	ADD3	0	0
RUFY3	13:60007041-60079198	Protein_coding	RUFY3L1	2:24124666-24124682	7	16	GAGAAATCTCTCGCAG	1	downstream_gene_variant	-	2	0
RUFY3	13:60007041-60079198	Protein_coding	RUFY3L2	12:34952104-34952120	2	16	TAAAATGCTGATTGAG	0	intron_variant	KCNQ5	2	0
RUVBL2	1:107384328-107400849	Protein_coding	RUVBL2L1	4:35135620-35135637	3	17	TAAAAGTGATGAGAATT	0	intergenic_variant	-	11	0
RUVBL2	1:107384328-107400849	Protein_coding	RUVBL2L2	12:63701575-63701592	1	17	CCTCTTCCTTATCGATA	0	intergenic_variant	-	11	0
RWDD1	1:56986809-57008720	Protein_coding	RWDD1L1	2:3613459-3613467	2	8	TAAAAAAA	0	intron_variant,non_coding_transcript_variant	LOC106560035	13	0
RWDD1	1:56986809-57008720	Protein_coding	RWDD1L2	9:11426985-11427004	41	19	TTATTTTATCAGCATTTCT	0	intron_variant	TANC2	13	0
RWDD1	1:56986809-57008720	Protein_coding	RWDD1L3	28:32689585-32689601	2	16	AAGAGATGATGGTTTT	0	intron_variant	BUB3	13	0
RWDD2B	31:24017573-24034230	Protein_coding	RWDD2BL1	22:12339769-12339790	3	21	TTCAAGATAACAAGACTTTAA	na	intergenic_variant	-	1	0
RWDD4	16:46736128-46751062	Protein_coding	RWDD4L1	16:32352804-32352821	9	17	TTAAGTTTCTGTCTTTA	0	intron_variant	NRG1	28	1
RWDD4	16:46736128-46751062	Protein_coding	RWDD4L2	20:47310973-47312112	5	na		na	downstream_gene_variant	OR7A54	28	1
RWDD4	16:46736128-46751062	Protein_coding	RWDD4L3	X:94036960-94036975	1	15	GGAAAGGCGAAAAAC	0	intergenic_variant	-	28	1
RYK	23:30968105-31051353	Protein_coding	RYKL1	6:70872725-70872740	2	15	TAAATGTGTCACATA	0	intron_variant	ACADM	6	0
S100A6	7:43501430-43503100	Protein_coding	S100A6L1	34:17563440-17563456	4	16	GGATGTGTTTTCTTTT	0	intergenic_variant	-	2	0
S100P	3:58804696-58807253	Protein_coding	S100PL1	2:68758660-68758679	2	19	AAAAATTTCCAAGATTAGG	0	intron_variant	ZBTB8A	4	0
S100P	3:58804696-58807253	Protein_coding	S100PL2	15:6900670-6900686	7	16	TCTTATGTTTTATTTT	0	downstream_gene_variant	SFPQ	4	0
S100P	3:58804696-58807253	Protein_coding	S100PL3	18:45750789-45750802	1	13	TACAAACAGAACC	na	intron_variant	MOB2	4	0
S100P	3:58804696-58807253	Protein_coding	S100PL4	34:34324611-34324631	25	20	GTTAAGCCACTGAATAAATT	0	intergenic_variant	-	4	0
SALL4	24:37941498-37959713	Protein_coding	SALL4L1	1:79238141-79238158	3	17	AATAAAACATCTATCAG	na	intron_variant	TLE4	0	0
SALL4	24:37941498-37959713	Protein_coding	SALL4L2	10:28558494-28558494	1	na		0	intron_variant	MB	0	0
SALL4	24:37941498-37959713	Protein_coding	SALL4L3	13:26521414-26521414	3	na		0	intron_variant,non_coding_transcript_variant	-	0	0
SALL4	24:37941498-37959713	Protein_coding	SALL4L4	22:5170544-5170560	5	16	TAGAAGAATGTTTCTA	0	intron_variant	ZC3H13	0	0
SAR1B	11:22713459-22743190	Protein_coding	SAR1BL1	6:37379004-37379024	75	20	TGTCCAAGCAGAGGGTTTTT	0	downstream_gene_variant	LOC111096314	16	0
SARNP	10:153682-203598	Protein_coding	SARNPL1	10:744960-744976	4	16	TAAAATTGTTCTTAGG	0	intron_variant	RBMS2	40	0
SBDS	6:1256087-1263482	Protein_coding	SBDSL1	18:39992934-39992948	71	14	TCAAGAATGAATTT	2	5_prime_UTR_variant	LOC100686934	15	0
SBDS	6:1256087-1263482	Protein_coding	SBDSL2	X:64024231-64024231	8	na		0	intergenic_variant	-	15	0
SCAF11	27:8343501-8396735	Protein_coding	SCAF11L1	2:39753457-39753477	7	20	TTTGTTTTTTCAGTATTTTG	0	intron_variant,non_coding_transcript_variant	-	1	0
SCAMP1	3:28296229-28417398	Protein_coding	SCAMP1L1	20:16808070-16808086	1	16	CAAAATATTCCTTTGG	0	intron_variant	CHL1	7	1
SCAMP3	7:42294764-42299097	Protein_coding	SCAMP3L1	X:10204263-10204279	5	16	AAAGATTTTATTTATT	0	intergenic_variant	-	2	0
SDAD1	32:511810-538293	Protein_coding	SDAD1L1	1:88520151-88520166	3	15	AAAAAATACACCAGG	0	intron_variant	PIP5K1B	20	1
SDAD1	32:511810-538293	Protein_coding	SDAD1L2	18:10305694-10305713	1	19	TATTTATTTATTTTTTTTT	0	intron_variant	POU6F2	20	1
SDAD1	32:511810-538293	Protein_coding	SDAD1L3	19:43526244-43526244	1	na		0	intron_variant	LRP1B	20	1
SDAD1	32:511810-538293	Protein_coding	SDAD1L4	20:18706484-18706500	4	16	TAAAAGACTTATTTCC	0	intron_variant	PDZRN3	20	1
SDAD1	32:511810-538293	Protein_coding	SDAD1L5	21:21473523-21473539	1	16	TGAATCTATATTTTTG	0	intron_variant	GDPD4	20	1
SDAD1	32:511810-538293	Protein_coding	SDAD1L6	24:1155116-1155132	1	16	CCCTTTTTTTTTTTTT	0	intergenic_variant	-	20	1
SDAD1	32:511810-538293	Protein_coding	SDAD1L7	25:2301889-2301904	154	15	CATATTTCATAAATT	0	intergenic_variant	-	20	1
SDAD1	32:511810-538293	Protein_coding	SDAD1L8	37:29416426-29416426	2	na		0	intergenic_variant	-	20	1
SDAD1	32:511810-538293	Protein_coding	SDAD1L9	X:43612267-43612284	34	17	TTAAAAAAGAGAAAGAG	0	intron_variant	SHROOM4	20	1
SDCBP	29:9331876-9370489	Protein_coding	SDCBPL1	1:115083403-115083420	2	17	AAAAATGAGTAAAAGGT	0	downstream_gene_variant	-	26	1
SDCBP	29:9331876-9370489	Protein_coding	SDCBPL2	7:24574895-24574909	1	14	TAAAAGTAAGACTT	0	intron_variant	RABGAP1L	26	1
SDCBP	29:9331876-9370489	Protein_coding	SDCBPL3	12:49893269-49893285	18	16	GCTTTCCAGGTTTCTT	0	intron_variant,non_coding_transcript_variant	LOC111098357	26	1
SDCBP	29:9331876-9370489	Protein_coding	SDCBPL4	18:38895152-38895161	6	9	TAAAAGAAC	0	intron_variant,non_coding_transcript_variant	LOC111090961	26	1
SDCBP	29:9331876-9370489	Protein_coding	SDCBPL5	19:4108056-4108071	2	15	TTCTGTGTTCTTTCT	1	non_coding_transcript_exon_variant	-	26	1
SDCBP	29:9331876-9370489	Protein_coding	SDCBPL6	20:15418379-15418395	128	16	TACGTATTTAGTTTTT	2	intergenic_variant	-	26	1
SDHAF4	12:33080545-33089944	Protein_coding	SDHAF4L1	38:20638626-20638645	1	19	GAGTTTATAATATTTTTAA	na	intergenic_variant	-	0	0
SDHB	2:81158291-81190110	Protein_coding	SDHBL1	5:40192636-40192652	1	16	TAAAATAAATCTTTAA	0	intergenic_variant	-	11	1
SDHB	2:81158291-81190110	Protein_coding	SDHBL2	17:59771581-59771596	5	15	AAAAAGCAGTAACTA	na	intergenic_variant	-	11	1
SDHD	5:21030295-21041125	Protein_coding	SDHDL1	13:44497841-44497858	3	17	AGAAATTATTTTTAAGG	0	intron_variant	FRYL	29	0
SEC13	20:8041485-8075078	Protein_coding	SEC13L1	11:15448564-15448578	1	14	AACAAATATATGAG	0	intron_variant,non_coding_transcript_variant	-	15	1
SEC61G	18:5564447-5570937	Protein_coding	SEC61GL1	30:11702355-11702372	2	17	AGAAAACCTTTTTTTTA	na	intron_variant,non_coding_transcript_variant	LOC100684040	15	0
SELENOF	6:61299310-61341035	Protein_coding	SELENOFL1	4:66318538-66318555	80	17	CAAAAAATTAAAAATAG	0	intergenic_variant	-	0	0
SEPHS1	2:23147303-23177174	Protein_coding	SEPHS1L1	2:41175820-41175840	1	20	CTCCTTTTATGTTTCTATTT	0	intron_variant	PPP2R2B	43	2
SEPHS1	2:23147303-23177174	Protein_coding	SEPHS1L2	11:6853530-6853541	3	11	AAAAAAATATG	na	intron_variant,non_coding_transcript_variant	-	43	2
SEPTIN2	25:51296486-51330508	Protein_coding	SEPTIN2L1	25:15560912-15560927	107	15	ATAAAAAAGATGGGG	0	intergenic_variant	-	7	1
SERTAD4	7:8856298-8862280	Protein_coding	SERTAD4L1	10:3070141-3070141	1	na		na	downstream_gene_variant	U6	2	0
SET	9:54896464-54907698	Protein_coding	SETL1	5:69944587-69944604	7	17	AAGAAGTCTTCTGGTCA	0	intron_variant	HSD17B2	112	2
SET	9:54896464-54907698	Protein_coding	SETL2	24:43534827-43534843	2	16	GCCTCTTTGTTTTTTA	0	intergenic_variant	-	112	2
SF3B4	17:59208989-59214643	Protein_coding	SF3B4L1	1:48512370-48512389	1	19	CCCTTGTCATATGGTTTTA	0	intron_variant	FNDC1	26	3
SF3B4	17:59208989-59214643	Protein_coding	SF3B4L2	8:22625008-22625024	4	16	AACATTTCTCGCTACC	0	3_prime_UTR_variant	FANCM	26	3
SF3B4	17:59208989-59214643	Protein_coding	SF3B4L3	29:80294-80310	3	16	AGAATATGAATAACTA	na	intron_variant	PRKDC	26	3
SF3B4	17:59208989-59214643	Protein_coding	SF3B4L4	36:22306096-22306111	3	15	AAAAACAAGATTACA	na	intron_variant	TTN	26	3
SF3B4	17:59208989-59214643	Protein_coding	SF3B4L5	X:65154092-65154112	15	20	AAGCTCTTTTTGTTTATTTC	1	intergenic_variant	-	26	3
SFPQ	15:6879955-6896309	Protein_coding	SFPQL1	1:71519487-71519507	1	20	AAGATATTGTGCATAGATAA	0	intron_variant	FANCC	8	1
SFPQ	15:6879955-6896309	Protein_coding	SFPQL2	20:2746295-2746311	3	16	CAAGAGGTGCACTTAG	0	intron_variant	RAB7A	8	1
SFXN4	28:29371427-29393649	Protein_coding	SFXN4L1	25:45486836-45486851	201	15	TTGTTTTAGCTTTTA	29	intergenic_variant	-	2	0
SGPP1	8:38195649-38228299	Protein_coding	SGPP1L1	17:61474318-61474318	1	na		1	intergenic_variant	-	0	0
SH3BP5	23:27258502-27334053	Protein_coding	SH3BP5L1	7:5705462-5705478	15	16	AAAACTGAATTCAGGG	16	downstream_gene_variant	F13B	0	0
SH3KBP1	X:15482593-15818113	Protein_coding	SH3KBP1L1	31:23718796-23718810	1	14	AAACTAGTCATATG	0	intergenic_variant	-	2	0
SH3YL1	17:202166-239508	Protein_coding	SH3YL1L1	23:14710603-14710619	2	16	CCCATCATTTAATTTT	0	intron_variant	RBMS3	2	0
SH3YL1	17:202166-239508	Protein_coding	SH3YL1L2	37:20512080-20512101	1	21	CTGTATATTTTAATTATTTTG	na	3_prime_UTR_variant	IKZF2	2	0
SH3YL1	17:202166-239508	Protein_coding	SH3YL1L3	X:115359490-115359507	12	17	AATTTCCATAAATTTAA	0	intergenic_variant	-	2	0
SHISA6	5:35420981-35701654	Protein_coding	SHISA6L1	9:36238479-36238488	0	9	AGAAATTTA	na	intron_variant	USP32	0	0
SIRT5	35:13017397-13055616	Protein_coding	SIRT5L1	13:16288084-16288100	2	16	CACAGTATATTTTTCT	na	intron_variant	EIF3H	7	0
SIX4	8:35735893-35748976	Protein_coding	SIX4L1	18:26996019-26996036	19	17	AGGGAGTGACATAATTT	1	intron_variant,non_coding_transcript_variant	-	0	0
SLC11A2	27:3788785-3823852	Protein_coding	SLC11A2L1	10:44394030-44394043	1	13	AGTTTTTATTTTA	na	intron_variant	VWA3B	1	1
SLC17A2	35:23839113-23919789	Protein_coding	SLC17A2L1	16:57693332-57693344	1	12	TTTTTACCTCTT	0	intergenic_variant	-	0	0
SLC18B1	1:25797992-25821943	Protein_coding	SLC18B1L1	13:52217071-52217087	1	16	AGAAGTGGAATTATAA	0	intron_variant,non_coding_transcript_variant	-	0	0
SLC25A12	36:16185011-16391080	Protein_coding	SLC25A12L1	8:3172186-3172203	2	17	TCCCTTTATCATTTTTT	0	intron_variant	SLC7A7	0	0
SLC25A13	14:21295651-21481767	Protein_coding	SLC25A13L1	8:27498048-27498064	3	16	AAGATCATGTCATCTG	0	intron_variant,non_coding_transcript_variant	LOC111097033	0	0
SLC25A44	7:41630868-41665894	Protein_coding	SLC25A44L1	24:43724373-43724373	1	na		0	intron_variant	NELFCD	0	0
SLC25A6	X:912937-916156	Protein_coding	SLC25A6L1	14:40230236-40230250	3	14	AAAGTCAGATGCTT	na	intron_variant	SKAP2	14	0
SLC26A7	29:36616054-36729705	Protein_coding	SLC26A7L1	20:53262896-53262913	1	17	AAAAAAAGAAGAAATCT	0	intron_variant	-	0	0
SLC30A5	2:54205510-54242451	Protein_coding	SLC30A5L1	11:45823300-45823317	3	17	TAATAATACCATAAGGC	2	intergenic_variant	-	2	0
SLC35G1	28:8080614-8091347	Protein_coding	SLC35G1L1	31:18280102-18280102	1	na		1	intergenic_variant	-	0	0
SLC38A1	27:8110327-8179394	Protein_coding	SLC38A1L1	8:73195471-73195760	1	na		na	intron_variant	-	0	0
SLC39A1	7:43171219-43174876	Protein_coding	SLC39A1L1	22:29396531-29396547	1	16	GGTTGGTAGCTTTTTA	na	intron_variant	UCHL3	11	0
SLC39A1	7:43171219-43174876	Protein_coding	SLC39A1L2	26:23391773-23391791	25	18	AACAATATTGCAGCCTGA	0	intergenic_variant	-	11	0
SLC41A2	10:33404968-33519146	Protein_coding	SLC41A2L1	3:28569581-28569581	2	na		0	intron_variant	AP3B1	0	0
SLC46A3	25:11031696-11050265	Protein_coding	SLC46A3L1	33:12017221-12017237	4	16	TTAAAATAACCTGGGA	0	intron_variant,non_coding_transcript_variant	-	1	0
SLC9B1	32:24292961-24352795	Protein_coding	SLC9B1L1	4:75758904-75758921	2	17	CCTCCTCTGCTTTTTAA	0	intron_variant	C4H5orf22	0	0
SLC9B1	32:24292961-24352795	Protein_coding	SLC9B1L2	5:61444669-61444686	2	17	CAGACTGCTATTTTTAA	0	downstream_gene_variant	VAMP3	0	0
SLIRP	8:50471175-50478923	Protein_coding	SLIRPL1	2:2171632-2171646	1	14	ATATGTTGTTTTAA	0	intron_variant	PARD3	43	1
SMAD4	1:23875989-23914318	Protein_coding	SMAD4L1	25:31630535-31630552	1	17	AGAAACATGCGAGATAC	0	intron_variant	EBF2	1	0
SMIM20	3:84481897-84494863	Protein_coding	SMIM20L1	27:748327-748342	1	15	AAAAAGTGGTTTCTA	0	intergenic_variant	-	8	0
SMIM20	3:84481897-84494863	Protein_coding	SMIM20L2	36:21307246-21307260	3	14	AGAAACAGTTCATC	0	intron_variant	AGPS	8	0
SMIM7	20:45895891-45908107	Protein_coding	SMIM7L1	5:82033009-82033024	1	15	TCTTGATCAATTCTT	0	intron_variant	LRRC36	3	0
SMIM8	12:46835228-46845614	Protein_coding	SMIM8L1	13:44155885-44155899	3	14	GAAATCTACTTTTA	na	intron_variant,non_coding_transcript_variant	-	0	0
SNRPA	1:113018268-113030827	Protein_coding	SNRPAL1	11:54387161-54387177	41	16	TTTTATGTCCCTTCTT	1	intron_variant,non_coding_transcript_variant	-	32	1
SNRPB	24:18673975-18683315	Protein_coding	SNRPBL1	1:30777242-30777257	1	15	TAAAAATGGTTTCTA	0	intron_variant	NHSL1	149	3
SNRPB	24:18673975-18683315	Protein_coding	SNRPBL2	6:14721185-14721202	1	17	AAGACTCAAGTATTTGC	0	intergenic_variant	-	149	3
SNRPB	24:18673975-18683315	Protein_coding	SNRPBL3	6:70253928-70253943	4	15	GAAGGAAGCATTATA	0	intron_variant	ST6GALNAC3	149	3
SNRPB	24:18673975-18683315	Protein_coding	SNRPBL4	34:18011335-18011353	3	18	GCCCTATATGTATTTTTT	na	intron_variant,non_coding_transcript_variant	LOC102152835	149	3
SNRPB	24:18673975-18683315	Protein_coding	SNRPBL5	X:77535682-77535695	1	13	TTCTTCTCTCATT	na	intron_variant	FAM199X	149	3
SNRPB2	24:6106217-6117369	Protein_coding	SNRPB2L1	1:19173948-19174047	1	na		na	intron_variant	TXNL1	116	4
SNRPB2	24:6106217-6117369	Protein_coding	SNRPB2L2	9:53808172-53808187	17	15	CAATTACTAGCTTCA	0	intron_variant	GPR107	116	4
SNRPB2	24:6106217-6117369	Protein_coding	SNRPB2L3	13:7823611-7823628	1	17	AAGAAAAGCCCTCCTTT	0	intergenic_variant	-	116	4
SNRPB2	24:6106217-6117369	Protein_coding	SNRPB2L4	14:15604882-15604897	2	15	AATAATTCATTTTCA	0	intron_variant,non_coding_transcript_variant	LOC106559683	116	4
SNRPB2	24:6106217-6117369	Protein_coding	SNRPB2L5	19:51352734-51352749	2	15	GATTCTGACTTCCTT	0	intergenic_variant	-	116	4
SNRPD2	1:109891253-109896712	Protein_coding	SNRPD2L1	12:56425863-56425878	1	15	TGAAATGAGAAGAGA	na	intron_variant,non_coding_transcript_variant	LOC106559552	4	0
SNRPE	38:515808-521536	Protein_coding	SNRPEL1	12:13758781-13758791	1	10	GCGTTAGCAG	na	intron_variant	RUNX2	100	0
SNU13	10:23622897-23631526	Protein_coding	SNU13L1	2:17124367-17124383	1	16	AGAAGTTCATGTTTAG	0	intron_variant,non_coding_transcript_variant	LOC111091390	0	0
SNU13	10:23622897-23631526	Protein_coding	SNU13L2	20:17307043-17307058	2	15	CAAATGGTATTTTTC	na	intergenic_variant	-	0	0
SNU13	10:23622897-23631526	Protein_coding	SNU13L3	22:33844860-33844876	9	16	AAGATCCTGTATTGTC	0	intergenic_variant	-	0	0
SNU13	10:23622897-23631526	Protein_coding	SNU13L4	27:41428780-41428796	14	16	AATAATCCCTCAAATA	0	intron_variant	PRMT8	0	0
SNW1	8:50478924-50512360	Protein_coding	SNW1L1	8:43240132-43240145	5	13	TGAGCAGCTAATT	0	intron_variant	SLC39A9	30	1
SNW1	8:50478924-50512360	Protein_coding	SNW1L2	32:17314016-17314031	3	15	TAAAAAGAGGGTAGA	na	intron_variant	PDLIM5	30	1
SNX18	4:60803245-60945317	Protein_coding	SNX18L1	1:6829688-6829690	1	2	TT	0	intergenic_variant	-	0	0
SNX2	11:12633270-12691099	Protein_coding	SNX2L1	13:12226832-12226846	3	14	GATTATGATTTATT	na	intergenic_variant	-	17	0
SNX3	12:65252175-65294620	Protein_coding	SNX3L1	3:82535862-82535862	1	na		0	intergenic_variant	-	16	0
SNX5	24:5085140-5110942	Protein_coding	SNX5L1	33:14405268-14405268	3	na		1	intron_variant,non_coding_transcript_variant	LOC102155445	16	0
SNX7	6:51004307-51388283	Protein_coding	SNX7L1	3:75141259-75141273	0	14	GCCATCCGGTTTTC	na	intron_variant,non_coding_transcript_variant	-	7	0
SOCS2	15:33761434-33788973	Protein_coding	SOCS2L1	12:23703373-23703385	4	12	AAAAAATAATTA	1	downstream_gene_variant	LOC111098293	0	0
SOCS2	15:33761434-33788973	Protein_coding	SOCS2L2	31:19312863-19312877	8	14	GACCTATTGCTTTA	0	intergenic_variant	-	0	0
SOD1	31:26540291-26544212	Protein_coding	SOD1L1	6:49710086-49710099	1	13	AAGAACTATCTTC	0	downstream_gene_variant	RTCA	61	1
SOD2	1:48943472-48955158	Protein_coding	SOD2L1	18:7669344-7669361	1	17	AATTTTTTTATTTTTTA	0	intergenic_variant	-	27	1
SPAG16	37:20782855-21690523	Protein_coding	SPAG16L1	8:31199319-31199643	1	na		0	3_prime_UTR_variant	ATG14	0	0
SPAG7	5:31657633-31661635	Protein_coding	SPAG7L1	29:16844806-16844821	3	15	AAAGACCTACACACA	0	intron_variant	ARFGEF1	8	1
SPATA24	2:34719710-34724880	Protein_coding	SPATA24L1	3:73682741-73682759	7	18	TAAATATATAGGCAGGAT	0	intron_variant,non_coding_transcript_variant	LOC106558641	0	0
SPCS2	21:23485367-23510249	Protein_coding	SPCS2L1	24:12471825-12471825	1	na		na	intron_variant	PAK5	38	0
SPCS2	21:23485367-23510249	Protein_coding	SPCS2L2	27:37497172-37497191	3	19	AGAATTTATTACTGATGAA	0	intron_variant	NECAP1	38	0
SPOUT1	9:54802145-54811709	Protein_coding	SPOUT1L1	38:15164281-15164294	56	13	CCAAAAAATTTTA	4	intergenic_variant	-	0	0
SPRYD7	22:1929814-1947506	Protein_coding	SPRYD7L1	18:37859069-37859086	1	17	AAAAAATAGTGAAAGGG	na	intergenic_variant	-	6	0
SRP14	30:7256467-7259080	Protein_coding	SRP14L1	3:84322376-84322376	1	na		0	intron_variant,non_coding_transcript_variant	-	50	2
SRPK1	12:4941292-5029580	Protein_coding	SRPK1L1	8:54293887-54293900	3	13	AAAATTACAAAGA	na	intron_variant,non_coding_transcript_variant	-	0	0
SRRM1	2:75018637-75049961	Protein_coding	SRRM1L1	6:72966055-72966062	11	7	ATTTTGT	0	intergenic_variant	-	3	0
SRRM1	2:75018637-75049961	Protein_coding	SRRM1L2	17:61438635-61438651	20	16	AAGAATTTGGGGGAGA	0	intergenic_variant	-	3	0
SRSF10	2:75587561-75597507	Protein_coding	SRSF10L1	7:17324944-17324944	1	na		0	intron_variant	COLGALT2	38	0
SRSF10	2:75587561-75597507	Protein_coding	SRSF10L2	9:56503016-56503033	2	17	CCTGATTCCAAGTTTTG	0	intergenic_variant	-	38	0
SRSF10	2:75587561-75597507	Protein_coding	SRSF10L3	11:6916905-6916975	1	na		0	intron_variant,non_coding_transcript_variant	-	38	0
SRSF10	2:75587561-75597507	Protein_coding	SRSF10L4	22:37123060-37123070	3	10	AAGAAAATCC	0	intergenic_variant	-	38	0
SRSF10	2:75587561-75597507	Protein_coding	SRSF10L5	X:12234520-12234537	2	17	CAGACTACTGATTCTTT	na	intergenic_variant	-	38	0
SRSF2	9:4028414-4032371	Protein_coding	SRSF2L1	32:11755311-11755313	1	2	TC	0	downstream_gene_variant	HERC6	13	0
SRSF3	12:5677879-5686220	Protein_coding	SRSF3L1	10:36403099-36403147	1	48	ATAAGAGTTTATATAATACTGGTATAATTTTTCCTTACAGATTTGACA	0	intergenic_variant	-	90	0
SRSF3	12:5677879-5686220	Protein_coding	SRSF3L2	14:18224089-18224106	2	17	GCTTCTCTGTATTTCTG	0	intron_variant	CDK6	90	0
SRSF3	12:5677879-5686220	Protein_coding	SRSF3L3	17:16829444-16829459	1	15	TAAAGCACATGAAGT	0	intron_variant,non_coding_transcript_variant	-	90	0
SRSF3	12:5677879-5686220	Protein_coding	SRSF3L4	23:11422963-11422979	2	16	AGAAGCTGGAAGAAGG	0	intron_variant	CCK	90	0
SRSF6	24:31217190-31222852	Protein_coding	SRSF6L1	3:5110198-5110198	1	na		0	intergenic_variant	-	14	1
SRSF6	24:31217190-31222852	Protein_coding	SRSF6L2	5:50819986-50819986	3	na		0	intergenic_variant	-	14	1
SS18L2	23:11713801-11717025	Protein_coding	SS18L2L1	15:56555307-56555376	2	na		na	intron_variant,non_coding_transcript_variant	-	1	0
SSBP2	3:25616750-25900843	Protein_coding	SSBP2L1	16:21828860-21828878	2	18	TAAAATGTCTAGGTAAGG	0	intron_variant	PSD3	3	0
SSBP2	3:25616750-25900843	Protein_coding	SSBP2L2	17:19318424-19318432	1	8	TCTTTTTT	0	downstream_gene_variant	LOC111090536	3	0
SSR1	35:7276697-7303194	Protein_coding	SSR1L1	5:44891483-44891500	1	17	TACACCACATCTTCTTT	0	intron_variant	DNAJC6	12	0
SSR1	35:7276697-7303194	Protein_coding	SSR1L2	24:11820585-11820602	2	17	AAAAGTGTTTCAAATAA	0	intron_variant	SLX4IP	12	0
SSRP1	18:38802673-38812134	Protein_coding	SSRP1L1	8:21062986-21062986	1	na		na	intergenic_variant	-	1	0
SSRP1	18:38802673-38812134	Protein_coding	SSRP1L2	21:9166302-9166319	3	17	AGAAAATATTTAATTTA	na	intergenic_variant	-	1	0
STARD7	17:34534036-34558217	Protein_coding	STARD7L1	6:16979226-16979241	1	15	TATAATACTTTTTTA	0	intron_variant	ITGAM	4	0
STIM2	3:83560690-83703978	Protein_coding	STIM2L1	33:209237-209402	1	na		0	intron_variant	LOC102153548	0	0
STIP1	18:52854262-52868187	Protein_coding	STIP1L1	1:116562228-116562245	53	17	TCAAGAGTTGCATGCTC	na	upstream_gene_variant	CAPNS1	23	6
STIP1	18:52854262-52868187	Protein_coding	STIP1L10	19:20614954-20614969	1	15	TAAAAACTAAATAAA	na	intron_variant,non_coding_transcript_variant	LOC111091128	23	6
STIP1	18:52854262-52868187	Protein_coding	STIP1L11	25:12267768-12267781	127	13	GCAGATCTCTTCT	na	downstream_gene_variant	-	23	6
STIP1	18:52854262-52868187	Protein_coding	STIP1L12	38:1308495-1308514	10	19	GTCCATCTGCCAAGGTTTA	na	intergenic_variant	-	23	6
STIP1	18:52854262-52868187	Protein_coding	STIP1L2	3:48910791-48910809	17	18	AACATTCATGAAGTTCTT	na	intron_variant,non_coding_transcript_variant	-	23	6
STIP1	18:52854262-52868187	Protein_coding	STIP1L3	3:53508599-53508616	1	17	ATATGTGCAGTACTTTG	na	intron_variant,non_coding_transcript_variant	LOC102156686	23	6
STIP1	18:52854262-52868187	Protein_coding	STIP1L4	6:69778945-69778962	1	17	TAAACATGGCGGATTCA	na	intron_variant	ST6GALNAC5	23	6
STIP1	18:52854262-52868187	Protein_coding	STIP1L5	7:63561100-63561116	3	16	CATCCCAAGTTTTTCA	na	non_coding_transcript_exon_variant	LOC111096910	23	6
STIP1	18:52854262-52868187	Protein_coding	STIP1L6	8:64437850-64437862	3	12	AATGAAAATCCA	na	intergenic_variant	-	23	6
STIP1	18:52854262-52868187	Protein_coding	STIP1L7	9:25010439-25010455	1	16	GATACAATCCCTTTAA	na	intron_variant	TTLL6	23	6
STIP1	18:52854262-52868187	Protein_coding	STIP1L8	12:58736143-58736157	3	14	TGTGATCTAACCTT	na	intron_variant	ASCC3	23	6
STIP1	18:52854262-52868187	Protein_coding	STIP1L9	14:23888146-23888163	4	17	CTCCAGTTATTTAAATT	na	intron_variant,non_coding_transcript_variant	-	23	6
STK11	20:57558966-57579137	Protein_coding	STK11L1	26:4138099-4138115	2	16	AAAAGAGTGTAATAGC	0	intron_variant,non_coding_transcript_variant	LOC111092521	3	0
STK26	X:102962012-103026278	Protein_coding	STK26L1	7:51535741-51535758	1	17	ATACCTGGGAATTTCTT	0	intron_variant,non_coding_transcript_variant	-	3	3
SUCLG1	17:40392969-40424875	Protein_coding	SUCLG1L1	27:10742856-10742871	1	15	AAAAAATAGTGTGTG	na	intron_variant,non_coding_transcript_variant	-	5	0
SUMO1	37:11199937-11229743	Protein_coding	SUMO1L1	2:43127773-43127790	2	17	AAAAGAAAGCATGACTA	na	intron_variant	IL31RA	106	8
SUMO2	9:5298315-5307578	Protein_coding	SUMO2L1	10:56147794-56147810	3	16	AGGAAGGAAAAGTTTC	na	intron_variant	MTIF2	106	8
SUMO2	9:5298315-5307578	Protein_coding	SUMO2L2	25:20382010-20382027	36	17	TAAGAAATTTAAATTTC	0	intron_variant	NEK1	91	1
SVIP	21:44408467-44418160	Protein_coding	SVIPL1	1:95970629-95970646	8	17	TAAAAACGTGGGACGCG	2	intergenic_variant	-	9	0
SVIP	21:44408467-44418160	Protein_coding	SVIPL2	13:8031638-8031653	5	15	AAGAACCAAATTCTT	0	intergenic_variant	-	9	0
SVIP	21:44408467-44418160	Protein_coding	SVIPL3	13:55584942-55584959	3	17	AAGAATTCCATGATGCT	0	intergenic_variant	-	9	0
SVIP	21:44408467-44418160	Protein_coding	SVIPL4	21:34884567-34884583	2	16	GAGTCTATACTATCTT	0	intergenic_variant	-	9	0
SVIP	21:44408467-44418160	Protein_coding	SVIPL5	25:22499797-22499813	12	16	GAATAAGTGATAATTT	1	intergenic_variant	-	9	0
SWAP70	21:32910547-32985617	Protein_coding	SWAP70L1	3:43015962-43015964	1	2	AA	0	intron_variant,non_coding_transcript_variant	-	1	0
SZRD1	2:81320737-81350712	Protein_coding	SZRD1L1	18:26639321-26639336	2	15	CTAACGGGATGTTTT	0	intergenic_variant	-	3	0
TADA1	7:31513289-31529891	Protein_coding	TADA1L1	5:43729101-43729117	9	16	TTGAATGGTATCATTT	0	intron_variant	DYNLT5	11	1
TAF10	21:29917941-29919347	Protein_coding	TAF10L1	10:48277776-48277791	28	15	ACGTTAGCCCATATT	0	intron_variant	PRKCE	17	2
TAF1D	21:7013383-7023497	Protein_coding	TAF1DL1	1:72459593-72459609	1	16	GAAAACTGTAAAACCC	0	intergenic_variant	-	4	0
TAF2	13:18724408-18824025	Protein_coding	TAF2L1	24:444596-444640	1	44	TTCTTCCCCAGACTTGATAATGTAATATGATCTGTTTTCAAGTT	0	intergenic_variant	-	22	0
TAX1BP3	9:47492371-47497298	Protein_coding	TAX1BP3L1	10:67255016-67255031	3	15	AAAAATAAAGAAATG	0	intron_variant	PPP3R1	7	0
TAX1BP3	9:47492371-47497298	Protein_coding	TAX1BP3L2	12:59832874-59832891	2	17	AGGATTCACTCTTCGTG	2	intron_variant	GRIK2	7	0
TAX1BP3	9:47492371-47497298	Protein_coding	TAX1BP3L3	16:9936819-9936834	2	15	ACTGCATTCTTTCTT	0	intron_variant	ATP6V0A4	7	0
TBC1D5	23:25206825-25758026	Protein_coding	TBC1D5L1	5:77880934-77880951	7	17	AAAAATAGTGTGGCATA	1	upstream_gene_variant	PMFBP1	0	0
TBCA	3:28972469-29027436	Protein_coding	TBCAL1	1:23910504-23910522	5	18	CCCCAAGTCAGTGTTCTT	0	intron_variant	SMAD4	32	0
TBCA	3:28972469-29027436	Protein_coding	TBCAL2	16:23106078-23106093	1	15	GGTATTGTGTTTTTT	0	intergenic_variant	-	32	0
TCEAL8	X:76431349-76433574	Protein_coding	TCEAL8L1	16:1612466-1612476	3	10	TTGTCTTTCT	na	intergenic_variant	-	0	0
TCEAL8	X:76431349-76433574	Protein_coding	TCEAL8L2	21:21141335-21141350	2	15	CAGTTTTCCATCTTT	0	intron_variant	CLNS1A	0	0
TCEAL8	X:76431349-76433574	Protein_coding	TCEAL8L3	22:32088732-32088747	1	15	AAAAAGCAGACACAG	0	intergenic_variant	-	0	0
TCEAL8	X:76431349-76433574	Protein_coding	TCEAL8L4	32:1861662-1861678	4	16	CTAGGCCCCTTCTCAT	na	downstream_gene_variant	LOC111093629	0	0
TDG	15:42493593-42516868	Protein_coding	TDGL1	24:3827299-3827315	1	16	GCTCTCTCTCTCTTTC	0	intron_variant	SLC24A3	57	0
TEAD4	27:41744100-41783223	Protein_coding	TEAD4L1	34:40439194-40439211	67	17	CAAGAAAATGCAAATCA	3	intron_variant,non_coding_transcript_variant	-	1	0
TEN1	9:4635192-4658455	Protein_coding	TEN1L1	10:1065147-1065159	5	12	TAAAATGATTAA	0	intergenic_variant	-	8	0
TEX2	9:12024134-12124759	Protein_coding	TEX2L1	25:37616624-37616643	6	19	CAAGAATGCAAGACTTTTT	11	intergenic_variant	-	2	0
TFB2M	7:37259671-37278397	Protein_coding	TFB2ML1	11:35298421-35298438	6	17	CTTAGGGCCTTTTCTTT	2	intron_variant	FREM1	10	0
TFB2M	7:37259671-37278397	Protein_coding	TFB2ML2	29:18914678-18914694	5	16	AAGAAATTGGAATGCT	0	intron_variant	SLCO5A1	10	0
TGM2	24:26631339-26662723	Protein_coding	TGM2L1	22:33679426-33679431	2	5	GAGTT	1	intron_variant,non_coding_transcript_variant	-	0	0
THAP10	30:34571371-34580697	Protein_coding	THAP10L1	10:22944389-22944409	5	20	TAAAAAATTATCCAATGAGA	0	intergenic_variant	-	0	0
THAP12	21:22293397-22316757	Protein_coding	THAP12L1	11:38700637-38700654	1	17	TAAATGATGCTTATTGA	na	intron_variant	ADAMTSL1	1	0
THAP12	21:22293397-22316757	Protein_coding	THAP12L2	14:2442040-2442057	4	17	TAAAATGATGACTTGGC	na	intergenic_variant	-	1	0
THAP12	21:22293397-22316757	Protein_coding	THAP12L3	36:27317681-27317694	4	13	AAAGTAGTTCCAT	1	intergenic_variant	-	1	0
THAP12	21:22293397-22316757	Protein_coding	THAP12L4	X:107469143-107469158	4	15	AAAATAGTGTAGTCA	0	intergenic_variant	-	1	0
THAP2	10:13216886-13231548	Protein_coding	THAP2L1	18:11346800-11346816	6	16	CAAGATCTTAAATATT	0	intron_variant	-	1	1
THEM4	17:60889245-60924848	Protein_coding	THEM4L1	10:26617420-26617436	2	16	AAAAACACAGTATTTA	na	intron_variant	PLA2G6	19	0
THOC1	7:67082100-67136592	Protein_coding	THOC1L1	X:110489670-110489686	1	16	TGGTTTCTCCTTTCCA	0	intergenic_variant	-	0	0
THOC7	20:27367628-27390868	Protein_coding	THOC7L1	3:17795001-17795012	3	11	TGTATATTTCT	na	intron_variant,non_coding_transcript_variant	LOC111095140	27	0
THUMPD3	20:8779442-8802286	Protein_coding	THUMPD3L1	17:25313373-25313392	1	19	GAAAATCACTCTAAGAAGA	0	intergenic_variant	-	10	0
TIMM50	1:113749778-113758480	Protein_coding	TIMM50L1	11:37037624-37037640	1	16	AGAAAAGTGAGTATCT	0	downstream_gene_variant	-	1	0
TIMM50	1:113749778-113758480	Protein_coding	TIMM50L2	12:20700506-20700514	6	8	TAAAATAG	0	intron_variant,non_coding_transcript_variant	-	1	0
TKT	20:36690540-36705980	Protein_coding	TKTL1	1:29269646-29269662	2	16	CACCAGGAAATCTTGT	0	intron_variant	MAP3K5	28	0
TM2D1	5:48274876-48315480	Protein_coding	TM2D1L1	18:33771860-33771876	4	16	CTTATTTTGCCTTTTT	0	intergenic_variant	-	13	1
TMA16	15:59720318-59751236	Protein_coding	TMA16L1	8:70620770-70620787	2	17	CTAATTGTAGCACTTTT	0	intron_variant	RCOR1	37	0
TMED10	8:48221372-48257242	Protein_coding	TMED10L1	7:44333774-44333788	2	14	AAGAAATTCTTTTC	0	intron_variant	HDHD2	21	0
TMEM126A	21:13787074-13795779	Protein_coding	TMEM126AL1	8:48525288-48525302	1	14	TAGAAGACATTTTA	na	intron_variant	JDP2	63	1
TMEM132B	26:4446667-4683425	Protein_coding	TMEM132BL1	4:23225595-23225613	6	18	AAGAATCTGAATGTACTT	0	intron_variant	MICU1	0	0
TMEM167A	3:24547518-24569624	Protein_coding	TMEM167AL1	6:54605699-54605713	2	14	AAAACAGAAGTTAC	na	intergenic_variant	-	92	1
TMEM167A	3:24547518-24569624	Protein_coding	TMEM167AL2	14:22947250-22947265	2	15	TAGAAACTTGTTTTA	0	intron_variant,non_coding_transcript_variant	LOC111098769	92	1
TMEM167A	3:24547518-24569624	Protein_coding	TMEM167AL3	32:22198062-22198079	5	17	TAAAGTATCAGTAAGAA	0	intergenic_variant	-	92	1
TMEM167A	3:24547518-24569624	Protein_coding	TMEM167AL4	35:5822898-5822913	2	15	AAAAAGAACAAATGA	0	intron_variant	FARS2	92	1
TMEM167B	6:42696240-42702135	Protein_coding	TMEM167BL1	25:21866658-21866676	2	18	ATAAATAAATAAAATGTT	0	intergenic_variant	-	0	0
TMEM183A	7:166640-180680	Protein_coding	TMEM183AL1	2:14220159-14220174	17	15	AAAATCCCAGAGGAG	2	intron_variant,non_coding_transcript_variant	-	18	0
TMEM183A	7:166640-180680	Protein_coding	TMEM183AL2	31:15149518-15149532	1	14	AGAAATTTTTTTCT	na	intergenic_variant	-	18	0
TMEM19	10:13232822-13251847	Protein_coding	TMEM19L1	13:59980002-59980021	3	19	CTACTCTCTTTTTTTTTTT	na	intergenic_variant	-	14	0
PACC1	7:10568030-10606672	Protein_coding	PACC1L1	27:21729980-21729998	20	18	TAAGAAAGTTGTTTTGGG	5	intron_variant,non_coding_transcript_variant	LOC111092834	0	0
TMEM216	18:54988893-55018601	Protein_coding	TMEM216L1	15:57390655-57390668	85	13	ATGTATATTTTAT	3	intergenic_variant	-	11	4
TMEM230	24:16486514-16496180	Protein_coding	TMEM230L1	1:38795260-38795277	1	17	TGTTCATTGCATTTTAA	0	upstream_gene_variant	LOC111095681	45	1
TMEM230	24:16486514-16496180	Protein_coding	TMEM230L2	36:5429530-5429545	1	15	AAAGATCTCTCAATA	na	intron_variant	BAZ2B	45	1
TMEM242	1:46870428-46901076	Protein_coding	TMEM242L1	12:70826264-70826264	2	na		0	intergenic_variant	-	9	0
TMEM242	1:46870428-46901076	Protein_coding	TMEM242L2	30:18692627-18692645	3	18	CTATTTCCTTTTCTTTTC	0	downstream_gene_variant	LOC102152470	9	0
TMEM243	14:13378196-13387213	Protein_coding	TMEM243L1	12:53855355-53855355	1	na		0	intergenic_variant	-	11	0
TMEM265	6:17433564-17436683	Protein_coding	TMEM265L1	27:10203458-10203472	2	14	AGAAACTAAAATAA	na	intron_variant	TMEM117	0	0
TMEM30A	12:36898136-36932189	Protein_coding	TMEM30AL1	18:41385425-41385445	3	20	TGTATCTCAATGTATTCTTA	0	upstream_gene_variant	OR4C12C	14	1
TMEM30A	12:36898136-36932189	Protein_coding	TMEM30AL2	X:74081493-74081501	1	8	CACACAAA	0	intergenic_variant	-	14	1
TMEM35A	X:75020157-75033714	Protein_coding	TMEM35AL1	12:13197376-13197385	2	9	TAAACATGG	0	intron_variant	SUPT3H	0	0
TMEM38B	11:61511756-61561987	Protein_coding	TMEM38BL1	5:80752427-80752443	27	16	TAAGAGTTCTTCTGGG	1	upstream_gene_variant	TANGO6	8	0
TMOD3	30:17509533-17594355	Protein_coding	TMOD3L1	27:18415240-18415260	14	20	CTGTATTTAATACTATTTTA	0	intron_variant	TMTC1	1	0
TMPO	15:37923392-37947146	Protein_coding	TMPOL1	15:47615097-47615112	15	15	TCAAAATGTGTTTAA	0	intron_variant	IQCM	4	0
TMX1	8:27541407-27556058	Protein_coding	TMX1L1	4:33591835-33591848	6	13	TGAAAACTCTTGG	0	intron_variant	GRID1	18	1
TNFAIP8	11:8624106-8685389	Protein_coding	TNFAIP8L1	22:20248947-20248965	29	18	TCCCCTGTTTCTATTTCT	0	intergenic_variant	-	0	0
TOMM20	4:4785589-4802170	Protein_coding	TOMM20L1	14:18081684-18081700	1	16	TCTCCTTGCAGTTCTA	0	intron_variant	PEX1	99	0
TOMM20	4:4785589-4802170	Protein_coding	TOMM20L2	24:2581755-2581769	1	14	AAAAAAATGTTGCT	0	intron_variant,non_coding_transcript_variant	LOC111092228	99	0
TOMM34	24:32351015-32368744	Protein_coding	TOMM34L1	2:51127870-51127887	3	17	AAGAAAATGTAAATAGA	na	intron_variant	ADAMTS6	3	0
TOMM5	11:53896300-53901523	Protein_coding	TOMM5L1	3:87251864-87251881	1	17	GCCTGGCTCTTGGTTTC	0	intergenic_variant	-	0	0
TPD52L2	24:47353523-47369432	Protein_coding	TPD52L2L1	11:57385241-57385256	24	15	ACTGATTTACACTTT	0	intron_variant	MSANTD3-TMEFF1	2	0
TPI1	27:38154519-38157900	Protein_coding	TPI1L1	2:10525340-10525357	1	17	GAAAGTGCTTATTTCTT	0	intron_variant	PIP4K2A	30	0
TPI1	27:38154519-38157900	Protein_coding	TPI1L2	2:24672039-24672054	1	15	CCATCTCCCACTTTC	1	intergenic_variant	-	30	0
TPT1	22:5711076-5715254	Protein_coding	TPT1L1	21:33533306-33533306	11	na		0	intron_variant,non_coding_transcript_variant	-	196	10
TPT1	22:5711076-5715254	Protein_coding	TPT1L2	27:40488567-40488584	5	17	AAGAATTATAGTCAATA	na	intergenic_variant	-	196	10
TRAPPC6B	8:17335060-17350163	Protein_coding	TRAPPC6BL1	1:33772163-33772179	55	16	CAGAAATGAATTTACC	0	downstream_gene_variant	NMBR	10	0
TRDMT1	2:19702561-19763744	Protein_coding	TRDMT1L1	14:56504868-56504885	1	17	CTCCTCTTGCATTTCTA	0	intergenic_variant	-	1	0
TRIM6	21:28595887-28611124	Protein_coding	TRIM6L1	1:25203580-25203596	58	16	TAAAAACTAGTAAACA	3	intergenic_variant	-	3	0
TRIM60	15:60997972-61005338	Protein_coding	TRIM60L1	12:37836851-37836869	3	18	AAGAAATAGAATAGTTGA	na	intron_variant,non_coding_transcript_variant	-	0	0
TRIP6	6:8894390-8898397	Protein_coding	TRIP6L1	36:7440642-7440658	1	16	ATAAAAATAAAATCTT	0	intron_variant	DPP4	2	0
TRMT1	20:49100794-49108734	Protein_coding	TRMT1L1	11:2075827-2075841	3	14	CAGCTTGATTTTTA	0	intron_variant	RUFY1	498	0
TRMT10A	32:21554096-21570894	Protein_coding	TRMT10AL1	X:64725216-64725234	3	18	TCTGCTTCAGTTATCTTG	na	intron_variant	CYLC1	4	0
TRMT112	18:52754379-52755596	Protein_coding	TRMT112L1	1:99663694-99663732	3	38	AAAATAAAATAAAATATAAAATAAAATAAATAAAATAA	na	intergenic_variant	-	486	0
TRMT6	24:15836359-15905147	Protein_coding	TRMT6L1	19:25196238-25196449	1	na		0	intergenic_variant	-	3	0
TROAP	27:5282495-5289106	Protein_coding	TROAPL1	8:49711449-49711464	10	15	AAGAGTCAGACACTC	0	intron_variant	ANGEL1	1	0
TRUB1	28:25690729-25727491	Protein_coding	TRUB1L1	9:29407140-29407156	5	16	AATAAATCCATTTTTA	0	intron_variant,non_coding_transcript_variant	LOC111097538	1	0
TSACC	7:41557977-41566126	Protein_coding	TSACCL1	32:984248-984264	3	16	TAAAATCACAAAAGGC	na	intron_variant	CCDC158	2	0
TSNAX	4:7937622-7968014	Protein_coding	TSNAXL1	9:44051972-44051987	1	15	TCACTTTCTTTTCTG	na	intron_variant	EFCAB5	1	0
TTC1	4:50603649-50650470	Protein_coding	TTC1L1	4:82089524-82089537	3	13	GAGAACCTATGTT	na	intron_variant,non_coding_transcript_variant	-	6	0
TTC14	34:13904072-13913936	Protein_coding	TTC14L1	21:15541654-15541670	3	16	TAGAATTGTACTTATC	0	intron_variant	DLG2	1	0
TTC33	4:68617895-68648914	Protein_coding	TTC33L1	18:32427557-32427574	1	17	CCAAGCCTTGGTTTTTT	na	intron_variant	PAMR1	2	0
TTC4	5:54406216-54431742	Protein_coding	TTC4L1	11:12883587-12883602	1	15	TAATTAGCATATTTA	0	intron_variant	-	6	0
TTLL11	9:60462698-60707423	Protein_coding	TTLL11L1	8:14180269-14180283	1	14	TCTGGGCCCTGGGT	0	downstream_gene_variant	LOC111097206	0	0
TUBB	12:512738-517154	Protein_coding	TUBBL1	16:16204055-16204063	1	8	CAACAGTC	0	intergenic_variant	-	52	1
TUBGCP2	28:40865742-40881105	Protein_coding	TUBGCP2L1	4:6856444-6856458	5	14	CCACCTTGTGAATG	0	intron_variant,non_coding_transcript_variant	LOC111095436	0	0
TUFM	6:18357223-18360929	Protein_coding	TUFML1	26:6999512-6999512	1	na		na	intron_variant	CLIP1	9	0
TWF1	27:10281249-10295550	Protein_coding	TWF1L1	4:44551497-44551511	6	14	AAATTCCTCCAGGG	0	intron_variant	TENM2	14	0
TWF1	27:10281249-10295550	Protein_coding	TWF1L2	27:18708074-18708092	2	18	AGAACTTGTCAGAATGGG	0	intron_variant	FAR2	14	0
TWF1	27:10281249-10295550	Protein_coding	TWF1L3	32:30462468-30462481	1	13	CTTTTCCTCGTTT	0	intergenic_variant	-	14	0
TWF1	27:10281249-10295550	Protein_coding	TWF1L4	X:118433452-118433452	1	na		0	intron_variant,non_coding_transcript_variant	LOC111094692	14	0
U2AF1	31:37263265-37276710	Protein_coding	U2AF1L1	16:45628287-45628287	2	na		0	intergenic_variant	-	24	0
U2SURP	23:38596544-38646784	Protein_coding	U2SURPL1	11:43627767-43627783	1	16	GTACATTTGTTTTTTA	0	intergenic_variant	-	1	0
UBA1	X:40784240-40807072	Protein_coding	UBA1L1	32:26884216-26884232	2	16	AATAGTTGGAATAAGG	na	intron_variant	TBCK	53	0
UBA52	20:44477128-44480023	Protein_coding	UBA52L1	22:8669982-8669997	4	15	CCCTTTTTACCTTTT	0	intron_variant	DGKH	210	8
UBAP2	11:50679601-50802955	Protein_coding	UBAP2L1	4:46771216-46771234	57	18	GATGAAAAAGTAGAATTC	5	intergenic_variant	-	1	0
UBE2A	X:91608936-91617993	Protein_coding	UBE2AL1	14:7849836-7849856	1	20	CAAAGTTAGTGGTGGTGGCA	0	intron_variant	CCDC136	11	0
UBE2C	24:33128300-33133637	Protein_coding	UBE2CL1	4:763207-763207	3	na		na	intron_variant	CHRM3	121	6
UBE2C	24:33128300-33133637	Protein_coding	UBE2CL2	6:16972522-16972539	117	17	CAGGAAACTAGCCAATA	0	intron_variant	ITGAM	121	6
UBE2C	24:33128300-33133637	Protein_coding	UBE2CL3	24:8978897-8978913	1	16	CTGTATAATTACTTTA	0	intergenic_variant	-	121	6
UBE2C	24:33128300-33133637	Protein_coding	UBE2CL4	36:12531738-12531753	1	15	GGAAGTAGAATTTTG	0	intron_variant	B3GALT1	121	6
UBE2D1	4:10521818-10551818	Protein_coding	UBE2D1L1	11:42184072-42184087	8	15	AGATAAAACAAATAC	0	intron_variant,non_coding_transcript_variant	-	66	0
UBE2E1	23:19863136-19937272	Protein_coding	UBE2E1L1	6:49738560-49738573	3	13	AAAGATTATACTA	na	intron_variant	RTCA	23	0
UBE2F	25:48503866-48558950	Protein_coding	UBE2FL1	3:78281843-78281852	0	9	TTACTTTGG	na	intergenic_variant	-	10	1
UBE2Q1	7:42806185-42813586	Protein_coding	UBE2Q1L1	9:9324067-9324082	3	15	AAGATGAGATAATAA	na	intron_variant	CDC27	7	0
UBE2R2	11:50554173-50678284	Protein_coding	UBE2R2L1	12:45497417-45497433	1	16	AGAAAAAGAGACACGG	na	intron_variant	NT5E	24	1
UBE2V2	29:307502-357962	Protein_coding	UBE2V2L1	7:20029794-20029807	1	13	TCATTGTGTTCTT	0	intron_variant	-	62	1
UBE2V2	29:307502-357962	Protein_coding	UBE2V2L2	38:10004218-10004233	28	15	AAAAATGATGATTGT	0	intergenic_variant	-	62	1
UBE2V2	29:307502-357962	Protein_coding	UBE2V2L3	X:65878837-65878853	1	16	CTAATCATGTATTTTT	0	intron_variant	APOOL	62	1
UBFD1	6:22242974-22276051	Protein_coding	UBFD1L1	3:83331047-83331064	1	17	AATAATACCAGCCCCAA	na	intron_variant,non_coding_transcript_variant	-	9	1
UBL3	25:10100524-10169042	Protein_coding	UBL3L1	25:33506519-33506773	1	na		0	intergenic_variant	-	3	0
UBXN2A	17:18446856-18491797	Protein_coding	UBXN2AL1	8:15586613-15586631	2	18	TAAAACACTAAGTTTTTC	0	intron_variant	SLC25A21	25	0
UBXN2A	17:18446856-18491797	Protein_coding	UBXN2AL2	22:54124635-54124648	71	13	TAAAGCCAGTTGG	0	intergenic_variant	-	25	0
UGP2	10:63532366-63597452	Protein_coding	UGP2L1	6:5712066-5712084	2	18	ATAAGTTACTTACGTTTT	0	intron_variant	RCC1L	6	0
UHMK1	38:20247564-20277941	Protein_coding	UHMK1L1	9:27126631-27126647	1	16	CTCCTGTTATTACTTT	na	intergenic_variant	-	4	0
UHMK1	38:20247564-20277941	Protein_coding	UHMK1L2	13:9543522-9543783	1	na		na	intergenic_variant	-	4	0
UNG	26:17900354-17911126	Protein_coding	UNGL1	38:8529818-8529832	1	14	TCAAATTAATTTTT	na	intron_variant	BRINP3	29	1
UQCR10	26:22953336-22955569	Protein_coding	UQCR10L1	28:7481244-7481259	1	15	CTCACTTTAACTTTC	0	downstream_gene_variant	-	0	0
UQCR10	26:22953336-22955569	Protein_coding	UQCR10L2	X:110334742-110334757	3	15	TTCAATGTAAATTTC	0	intergenic_variant	-	0	0
UROD	15:15313808-15317130	Protein_coding	URODL1	X:2637403-2637403	1	na		0	intergenic_variant	-	1	0
UROS	28:34952074-34973239	Protein_coding	UROSL1	X:97860292-97860308	22	16	TAAAAAAAAACCTGTG	0	intergenic_variant	-	2	0
ATP5MK	28:15761732-15767892	Protein_coding	ATP5MKL1	4:39851307-39851307	1	na		0	intron_variant,non_coding_transcript_variant	LOC111095542	0	0
ATP5MK	28:15761732-15767892	Protein_coding	ATP5MKL2	9:18600348-18600360	3	12	TAAACATGTTGA	na	intron_variant	EFTUD2	0	0
ATP5MK	28:15761732-15767892	Protein_coding	ATP5MKL3	32:35012836-35012852	1	16	TTCTACTGATTTTATT	0	intergenic_variant	-	0	0
USP38	19:201810-238361	Protein_coding	USP38L1	16:1975775-1975775	1	na		0	intron_variant	EZH2	0	0
UTP11	15:4569002-4579065	Protein_coding	UTP11L1	12:57323238-57323255	2	17	CATTGAACCTATTCTTA	0	intergenic_variant	-	9	0
UTP11	15:4569002-4579065	Protein_coding	UTP11L2	35:2010926-2010941	1	15	TGTTTCTTAAATTTC	0	intergenic_variant	-	9	0
VAMP5	17:39488877-39495795	Protein_coding	VAMP5L1	10:41811322-41811337	1	15	GAAACAGAGGTTTTA	na	intron_variant	TBC1D8	0	0
VAPA	7:75844927-75891811	Protein_coding	VAPAL1	7:9471764-9471779	2	15	AAAACTCAGTGCGGC	0	intron_variant	KCNH1	6	0
VASP	1:110050154-110063125	Protein_coding	VASPL1	3:7203524-7203540	86	16	CTAAAAAAGAAAAAGG	1	intergenic_variant	-	1	0
VBP1	X:123210965-123231847	Protein_coding	VBP1L1	27:28992887-28992900	2	13	TAGAGAGAATATT	0	intron_variant,non_coding_transcript_variant	LOC111092818	30	2
VDAC1	11:22197814-22212924	Protein_coding	VDAC1L1	6:56753487-56753502	8	15	TAAACTATTTTTTTT	0	intron_variant	BTBD8	110	1
VDAC1	11:22197814-22212924	Protein_coding	VDAC1L2	7:69324610-69324626	1	16	GAATTGTATGCTTTTA	0	intergenic_variant	-	110	1
VDAC2	4:25449926-25462147	Protein_coding	VDAC2L1	1:104742427-104742441	1	14	TGCAAGATACATCT	na	intron_variant,non_coding_transcript_variant	-	31	1
VDAC2	4:25449926-25462147	Protein_coding	VDAC2L2	19:5690695-5690710	12	15	GGCCAAGAAGTTTTT	0	intergenic_variant	-	31	1
VDAC2	4:25449926-25462147	Protein_coding	VDAC2L3	33:30836789-30836807	123	18	TTAAAATCTGGACTCGGC	0	intron_variant	XXYLT1	31	1
VDAC3	16:23276763-23289752	Protein_coding	VDAC3L1	14:36679537-36679561	6	24	TGAGTGTCATTTTCCTTCTTTTTT	0	intron_variant	FAM126A	50	5
VDAC3	16:23276763-23289752	Protein_coding	VDAC3L2	21:39275759-39275774	5	15	AACAACTGCAGTTGT	0	intron_variant	SOX6	50	5
VIL1	37:25065887-25090238	Protein_coding	VIL1L1	6:4232332-4232332	8	na		0	intergenic_variant	-	1	0
VMA21	X:119429680-119435756	Protein_coding	VMA21L1	25:19946777-19946777	61	na		na	intron_variant	LOC477353	11	0
VOPP1	18:6282050-6387687	Protein_coding	VOPP1L1	30:32888132-32888304	2	na		na	intergenic_variant	-	2	0
VPS29	26:8301699-8309364	Protein_coding	VPS29L1	32:26131769-26131783	1	14	CTTAAAACTGTTTA	0	intron_variant	TET2	11	0
VPS36	25:150984-191531	Protein_coding	VPS36L1	23:23025251-23025270	12	19	AGAAAACAGTTTGGCACTT	0	intergenic_variant	-	2	0
VPS37A	16:40571892-40624359	Protein_coding	VPS37AL1	11:67395499-67395514	2	15	CTTAAGTTTCCTTCT	na	intron_variant	LOC102155618	18	0
VSTM2A	18:5344966-5373486	Protein_coding	VSTM2AL1	8:17301390-17301406	2	16	TAAAAGAGGGATAAAG	0	intron_variant,non_coding_transcript_variant	LOC111097006	0	0
VTI1B	8:41619365-41650389	Protein_coding	VTI1BL1	32:7753571-7753582	1	11	CTTAATCTTAA	0	intergenic_variant	-	34	0
WARS1	8:68610105-68644616	Protein_coding	WARS1L1	1:29054817-29054832	2	15	TAAAATACTCCAGTT	na	intron_variant	MAP7	6	0
WBP2	9:4743476-4751333	Protein_coding	WBP2L1	3:13711648-13711663	18	15	AGAAATTCAGAACTC	0	intron_variant	ELL2	16	1
WBP2	9:4743476-4751333	Protein_coding	WBP2L2	20:27484199-27484215	3	16	GTCAGTTGCGTTCTTT	na	intergenic_variant	-	16	1
WBP2	9:4743476-4751333	Protein_coding	WBP2L3	33:19719988-19720003	1	15	TGAAATGTCCTCCTC	0	intron_variant	GAP43	16	1
WDR61	3:58403146-58418782	Protein_coding	WDR61L1	9:57064243-57064256	1	13	AAGATCACTTTAG	na	intergenic_variant	-	9	3
DNAI4	5:43590200-43690293	Protein_coding	DNAI4L1	1:45084116-45084130	4	14	GCAATTCACTTCTT	0	intergenic_variant	-	0	0
WIPI2	6:12656469-12698623	Protein_coding	WIPI2L1	5:88712046-88712065	3	19	AAAATATATAAATTTTTTT	na	intergenic_variant	-	0	0
WIPI2	6:12656469-12698623	Protein_coding	WIPI2L2	7:77550288-77550304	1	16	AAGACTAACTTTCTGG	na	intergenic_variant	-	0	0
WIPI2	6:12656469-12698623	Protein_coding	WIPI2L3	8:44097199-44097216	3	17	AAAGAACAGCTTTCCCC	na	intron_variant,non_coding_transcript_variant	LOC611720	0	0
WSB1	9:41870182-41887078	Protein_coding	WSB1L1	14:52165824-52165895	3	na		na	intergenic_variant	-	1	0
WTAP	1:48976523-49004536	Protein_coding	WTAPL1	4:30379752-30379752	1	na		0	intergenic_variant	-	2	2
WWC2	16:47014151-47185456	Protein_coding	WWC2L1	18:30264602-30264617	13	15	GAAAGTGGAATTTCA	1	intergenic_variant	-	1	0
WWOX	5:72298254-73243667	Protein_coding	WWOXL1	14:40104706-40104721	4	15	AGGAGAGAGAAGTGA	0	intron_variant	SKAP2	0	0
XBP1	26:22162675-22168149	Protein_coding	XBP1L1	33:9225523-9225523	2	na		1	intergenic_variant	-	1	0
XPO7	25:35236794-35277211	Protein_coding	XPO7L1	6:13953879-13953894	1	15	AAGAAGCATAGTTAG	0	intergenic_variant	-	0	0
XRCC1	1:111548719-111571816	Protein_coding	XRCC1L1	15:37774859-37774859	5	na		3	intergenic_variant	-	1	0
XRCC6	10:23637905-23661618	Protein_coding	XRCC6L1	3:88240978-88240992	1	14	AGAAAAGACAAGGA	0	intron_variant	KCNIP4	16	0
YBX3	27:35043756-35066230	Protein_coding	YBX3L1	12:2488812-2488828	1	16	AAAAAAGTAAAATAAA	0	intergenic_variant	-	6	0
YTHDF1	24:46927218-46940015	Protein_coding	YTHDF1L1	1:45343148-45343164	1	16	AATAAGGTAATTATGT	na	intergenic_variant	-	4	0
YTHDF2	2:71760232-71791420	Protein_coding	YTHDF2L1	3:64884784-64884799	2	15	TTTTTTTTTTTTTTT	0	downstream_gene_variant	C1QTNF7	2	0
YWHAE	9:45506830-45562081	Protein_coding	YWHAEL1	25:589746-589763	2	17	AAAAGACTTCCACATCT	na	intergenic_variant	-	49	0
YWHAE	9:45506830-45562081	Protein_coding	YWHAEL2	34:6874403-6874418	6	15	CAAAACTGGAAATGA	0	intergenic_variant	-	49	0
YWHAQ	17:6660504-6697954	Protein_coding	YWHAQL1	15:33277090-33277106	16	16	GGAAAAGCAATTTTCC	1	intergenic_variant	-	84	0
YWHAZ	13:2729404-2764422	Protein_coding	YWHAZL1	36:15828420-15828436	1	16	GGCACAAATACTTTGA	na	intron_variant	METTL8	117	6
ZBED4	10:17313750-17343609	Protein_coding	ZBED4L1	14:21231603-21231621	15	18	TTAAAAATGCATAGCCTG	2	intron_variant	DYNC1I1	0	0
ZBTB9	12:2863709-2866565	Protein_coding	ZBTB9L1	20:20139856-20139872	1	16	GCTTTACTGGAATTCT	0	intergenic_variant	-	0	0
ZCCHC10	11:21269879-21290673	Protein_coding	ZCCHC10L1	8:25266497-25266512	1	15	AAAAACTGTTGATTC	0	intergenic_variant	-	19	1
ZCCHC17	2:69659152-69720942	Protein_coding	ZCCHC17L1	18:14582720-14582735	1	15	GAAATCCAAAAGGGT	0	intergenic_variant	-	17	2
ZCCHC4	3:84921250-84966783	Protein_coding	ZCCHC4L1	X:83062534-83062550	1	16	ACAAAAATGTACTGTT	0	intergenic_variant	-	3	0
ZCRB1	27:11590152-11605079	Protein_coding	ZCRB1L1	21:28269917-28269931	1	14	TATATTCCATTTTC	na	intron_variant	-	35	0
ZDHHC15	X:58641182-58812671	Protein_coding	ZDHHC15L1	18:37496007-37496022	1	15	AACAAGTGGCAATCA	0	upstream_gene_variant	OR5AN6	1	0
ZDHHC5	18:38497649-38517964	Protein_coding	ZDHHC5L1	12:38272093-38272110	3	17	AAGAAGGACACTTGTGA	na	intergenic_variant	-	1	0
ZFAND1	29:28799635-28825494	Protein_coding	ZFAND1L1	3:54220557-54220574	2	17	TAAAGTATAACTTTTTA	0	intron_variant	PDE8A	10	0
ZFAND6	3:57341757-57406205	Protein_coding	ZFAND6L1	12:64227107-64227124	29	17	CAAAAGCCTTAAAAATG	0	intergenic_variant	-	15	0
ZFP2	11:2632779-2698628	Protein_coding	ZFP2L1	6:5167735-5167737	3	2	TC	0	intergenic_variant	-	4	0
ZFP36L2	10:45746952-45751268	Protein_coding	ZFP36L2L1	21:9857314-9857325	1	11	CTGTGCTTTTG	0	intron_variant,non_coding_transcript_variant	LOC106560174	0	0
ZFR	4:75038248-75124154	Protein_coding	ZFRL1	23:15568237-15568254	1	17	AGAAAAATATAGAGGTC	0	intron_variant	RBMS3	1	0
ZMYND8	24:34322364-34466044	Protein_coding	ZMYND8L1	13:19052785-19052793	1	8	AAAAAAAA	0	intron_variant	COL14A1	0	0
ZNF131	4:66738301-66769015	Protein_coding	ZNF131L1	14:48688293-48690415	3	na		0	intron_variant	ELMO1	6	0
ZNF131	4:66738301-66769015	Protein_coding	ZNF131L2	X:23904509-23904509	1	na		0	intron_variant	IL1RAPL1	6	0
ZNF142	37:25244783-25262585	Protein_coding	ZNF142L1	3:33152823-33152836	7	13	AAAATTCCTTAGA	0	intron_variant	GABRG3	0	0
ZNF146	1:116457967-116480515	Protein_coding	ZNF146L1	12:15581606-15581618	25	12	TAAGAATCTCTT	0	intron_variant	CD2AP	0	0
ZNF146	1:116457967-116480515	Protein_coding	ZNF146L2	29:27135092-27135105	2	13	AAGTCATTTTAGT	0	intergenic_variant	-	0	0
ZNF296	1:110405643-110411848	Protein_coding	ZNF296L1	6:6138126-6138335	2	na		na	intron_variant	RFC2	0	0
ZNF639	34:12767067-12775995	Protein_coding	ZNF639L1	20:17464582-17464597	4	15	AGAACTATGGTATGG	0	intergenic_variant	-	0	0
ZNF639	34:12767067-12775995	Protein_coding	ZNF639L2	22:40415962-40415962	2	na		na	intergenic_variant	-	0	0
ZNF639	34:12767067-12775995	Protein_coding	ZNF639L3	33:20247006-20247022	1	16	AATAAAGTGTCTTGCC	0	intron_variant	LSAMP	0	0
ZNF667	1:101604938-101632038	Protein_coding	ZNF667L1	9:17523283-17523299	6	16	AGAAATCCATTAAAGT	0	intergenic_variant	-	0	0
ZNF667	1:101604938-101632038	Protein_coding	ZNF667L2	13:50634550-50634566	15	16	TCCCAATTGAATTCTT	0	intergenic_variant	-	0	0
ZNF667	1:101604938-101632038	Protein_coding	ZNF667L3	24:32195740-32195756	1	16	TAAATATAGTCATCAG	0	intron_variant	KCNK15	0	0
ZNF70	26:28753160-28761633	Protein_coding	ZNF70L1	38:5013312-5013332	4	20	TCTTACACTTCAAATCTTTT	4	intron_variant,non_coding_transcript_variant	LOC111094580	1	0
ZNRF2	14:43029270-43123292	Protein_coding	ZNRF2L1	27:17836139-17836154	5	15	CCATGAGAGACTTCT	0	intergenic_variant	-	37	0
ZRANB2	6:74870825-74886143	Protein_coding	ZRANB2L1	31:32211956-32211970	2	14	AAGAGTATTTCTGA	0	upstream_gene_variant	TTC3	14	0
ZRSR2	X:12046163-12073617	Protein_coding	ZRSR2L1	7:44651229-44651247	1	18	CCCCTGCATAGTCTTTTA	0	3_prime_UTR_variant	ST8SIA5	7	0
ZSWIM1	24:33174950-33177754	Protein_coding	ZSWIM1L1	7:57931163-57931181	1	18	AATATGGTAAATTTTTTA	na	intron_variant	TTR	0	0
ZZZ3	6:69180465-69278740	Protein_coding	ZZZ3L1	38:8923947-8923963	2	16	TAGAAATAGGTGGGTC	0	intergenic_variant	-	2	0
