# Supplementary material for: Recent, full-length gene retrocopies are common in canids
Source: HighWire-hosted journal article supplement (doi:10.1101/gr.276828.122), 2022-08-01
Supplement: Supplemental_Table_S3.xlsx [file Supplemental_Table_S3.xlsx]

## Sheet: S3
Supplemental Table S3: RetroCNV parent genes with no insertion site identified
Parent_gene	Parent_location	RetroCNV_location	Number_of_dogs	Individuals
MITF	20:21772147-21873545	chrY	157	SRR7107537,SRR7107548,SRR7107609,SRR7107593,SRR7107579,SRR7107632,SRR7107544,E270,E356,E360,E361,E669,E695,SRR7107597,SRR7107616,SRR7107618,SRR7107623,SRR7107604,SRR7107525,IT221,SRR7107575,SRR7107637,SRR7107608,SRR7107561,SRR7107530,SRR7107622,SRR7107594,SRR10596312,SRR10596318,SRR11193488,SRR11193493,SRR11193499,SRR2094385,SRR2094398,SRR2094401,SRR2094404,SRR2094406,SRR2094408,SRR2095320,SRR209…
NME7	7:29201273-29464072	chrY	156	SRR7107537,SRR7107548,SRR7107609,SRR7107593,SRR7107579,SRR7107632,SRR7107544,E270,E356,E360,E361,E669,E695,SRR7107597,SRR7107616,SRR7107618,SRR7107623,SRR7107604,SRR7107525,IT221,SRR7107575,SRR7107637,SRR7107608,SRR7107561,SRR7107530,SRR7107622,SRR7107594,SRR10596312,SRR10596318,SRR11193488,SRR11193493,SRR11193499,SRR2094385,SRR2094398,SRR2094401,SRR2094404,SRR2094406,SRR2094408,SRR2095320,SRR209…
TXNDC12	15:9261493-9292097	chrY	152	SRR7107537,SRR7107548,SRR7107609,SRR7107593,SRR7107579,SRR7107632,SRR7107544,E270,E356,E360,E361,E669,E695,SRR7107597,SRR7107616,SRR7107618,SRR7107623,SRR7107604,SRR7107525,IT221,SRR7107575,SRR7107637,SRR7107608,SRR7107561,SRR7107530,SRR7107622,SRR7107594,SRR10596312,SRR10596318,SRR11193488,SRR11193493,SRR11193499,SRR2094385,SRR2094398,SRR2094401,SRR2094404,SRR2094406,SRR2094408,SRR2095320,SRR209…
PPP2CB	16:33532703-33567011	chrY	156	SRR7107537,SRR7107548,SRR7107609,SRR7107593,SRR7107579,SRR7107632,SRR7107544,E270,E356,E360,E361,E669,E695,SRR7107597,SRR7107616,SRR7107618,SRR7107623,SRR7107604,SRR7107525,IT221,SRR7107575,SRR7107637,SRR7107608,SRR7107561,SRR7107530,SRR7107622,SRR7107594,SRR10596312,SRR10596318,SRR11193488,SRR11193493,SRR11193499,SRR2094385,SRR2094398,SRR2094401,SRR2094404,SRR2094406,SRR2094408,SRR2095320,SRR209…
ANKRD37	16:45230095-45233411	Satellite_DNA	1	SRR7107642
ARL1	15:40390091-40401043	Satellite_DNA	17	E270,E356,E360,E361,E669,E695,SRR7107575,SRR2095320,SRR5664959,SRR7107642,SRR7107698,SRR7107798,SRR7107802,SRR7107803,SRR7107855,SRR7107883,SRR7107894,SRR7107573
BBS4	30:36058932-36109206	Satellite_DNA	1	SRR7107705
CNPY2	10:617633-620839	Satellite_DNA	1	SRR7107816
DIS3L2	25:43754382-44099497	Satellite_DNA	1	SRR7107777
EIF3G	20:50941413-50946042	Satellite_DNA	1	SRR7107821
FUT2	1:107616477-107626968	Satellite_DNA	80	SRR7107632,SRR7107544,SRR7107629,E360,E361,SRR7107623,SRR7107558,SRR7107575,SRR7107637,SRR7107611,SRR7107592,SRR7107531,SRR7107584,SRR10596315,SRR11193493,SRR2094398,SRR2094407,SRR2094409,SRR2095322,SRR2095368,SRR2095480,SRR2095487,SRR2095497,SRR2095501,SRR5664958,SRR5664959,SRR5664964,SRR7107568,SRR7107657,SRR7107658,SRR7107682,SRR7107794,SRR7107800,SRR7107801,SRR7107803,SRR7107809,SRR7107815,SR…
FXYD1	1:117436239-117440458	Satellite_DNA	2	SRR7107556,SRR7107637
GABARAPL1	27:35783203-35791576	Satellite_DNA	2	SRR7107556,SRR7107637
GABARAPL2	5:75230214-75240724	Satellite_DNA	1	SRR7107969
GALNT11	16:15901246-15951732	Satellite_DNA	3	SRR7107680,SRR7107814,SRR7107992
KARS1	5:75172976-75188197	Satellite_DNA	3	SRR7107579,SRR7107786,SRR7107821
KEAP1	20:50651070-50661178	Satellite_DNA	1	SRR7107913
LOC100685226	1:105139160-105173050	Satellite_DNA	25	SRR7107543,SRR10596312,SRR10596315,SRR10596318,SRR7107562,SRR7107650,SRR7107668,SRR7107686,SRR7107688,SRR7107697,SRR7107702,SRR7107703,SRR7107705,SRR7107706,SRR7107716,SRR7107816,SRR7107821,SRR7107822,SRR7107823,SRR7107824,SRR7107952,SRR7107955,SRR7107990,SRR7107991,SRR7120191
LOC607207	7:69860472-69871878	Satellite_DNA	7	SRR7107632,SRR7107637,SRR5664958,SRR7107772,SRR7107775,SRR7120187,SRR7107573
NT5DC1	12:71790973-71909109	Satellite_DNA	15	SRR7107578,SRR7107597,SRR7107618,SRR2095478,SRR2095504,SRR7107701,SRR7107822,SRR7107905,SRR7107916,SRR7107922,SRR7107976,SRR7107978,SRR7120168,SRR7120170,SRR7107550
RPIA	17:37640740-37671308	Satellite_DNA	75	SRR7107537,SRR7107579,SRR7107546,SRR7107543,E356,E669,SRR7107623,IT221,SRR2094385,SRR2094401,SRR2094404,SRR2094409,SRR2095320,SRR2095322,SRR2095368,SRR2095463,SRR2095480,SRR2095497,SRR2095504,SRR5664965,SRR7107568,SRR7107642,SRR7107660,SRR7107689,SRR7107692,SRR7107700,SRR7107702,SRR7107792,SRR7107793,SRR7107798,SRR7107801,SRR7107803,SRR7107810,SRR7107834,SRR7107837,SRR7107840,SRR7107854,SRR710785…
TKTL1	X:122007270-122034500	Satellite_DNA	1	SRR7107776
TMEM107	5:32991000-32993319	Satellite_DNA	3	SRR2095540,SRR7107801,SRR7120193
UCHL1	3:71396694-71430395	Satellite_DNA	4	SRR2095503,SRR7107684,SRR7107690,SRR7107898
ZNF287	5:39384803-39405850	Satellite_DNA	2	SRR7107776,SRR7107780
SEPTIN7	14:47395704-47494873	na	4	SRR7107642,SRR7107803,SRR7107837,SRR7107538
AAK1	10:68181584-68336266	na	1	SRR7107802
ACTN2	4:3348529-3415275	na	2	SRR7107829,SRR7107837
ADNP2	1:600804-635013	na	1	SRR7107871
ATP2C1	23:28097831-28233675	na	1	SRR7107650
AVL9	14:44881279-44914680	na	3	SRR7107688,SRR7107700,SRR7107815
BCLAF1	1:28852654-28882095	na	1	SRR11193493
C15H12orf29	15:29182975-29241884	na	2	SRR7107716,SRR7107771
C6H7orf50	6:15749123-15883001	na	1	SRR7107688
CALB1	29:35551836-35572985	na	1	SRR7107805
CAPN5	21:21626090-21678545	na	1	SRR7107693
CCNC	12:57738576-57760918	na	3	SRR7107990,SRR7107991,SRR7120191
CETN3	3:18529198-18547195	na	3	SRR7107556,SRR7107716,SRR7107771
CHPT1	15:40602570-40631422	na	2	SRR7107556,SRR7107637
CLCC1	6:42807432-42829317	na	1	SRR7107695
CLIP3	1:116657613-116670738	na	1	SRR7107710
CPS1	37:18308164-18428487	na	2	SRR7107556,SRR7107637
MED14	21:37807941-37811724	na	1	SRR7874817
CRTC3	3:53564244-53669778	na	184	SRR7107578,SRR7107537,SRR7107589,SRR7107535,SRR7107581,SRR7107609,SRR7107593,SRR7107556,SRR7107579,SRR7107632,SRR7107544,E270,E356,E360,E669,E695,SRR7107597,SRR7107623,SRR7107525,SRR7107558,SRR7107575,SRR7107637,SRR7107611,SRR7107526,SRR7107527,SRR7107528,SRR7107530,SRR7107619,SRR7107622,SRR7107594,SRR10596312,SRR10596318,SRR11193493,SRR2094385,SRR2094392,SRR2094398,SRR2094406,SRR2094408,SRR20944…
DCTN3	11:51287966-51294049	na	4	SRR7107783,SRR7107784,SRR7107906,SRR7107913
DLA88	12:892442-895691	na	1	SRR7107556
DOK6	1:8446332-8707600	na	79	SRR7107543,SRR7107525,SRR7107528,SRR7107594,SRR10596315,SRR10596318,SRR11193488,SRR11193493,SRR11193499,SRR2094392,SRR2094405,SRR2094408,SRR2095362,SRR2095503,SRR7107562,SRR7107568,SRR7107649,SRR7107650,SRR7107660,SRR7107668,SRR7107677,SRR7107682,SRR7107686,SRR7107688,SRR7107689,SRR7107690,SRR7107692,SRR7107693,SRR7107694,SRR7107697,SRR7107701,SRR7107702,SRR7107703,SRR7107705,SRR7107706,SRR710771…
DTWD2	11:8257068-8366874	na	3	SRR7107701,SRR7107703,SRR7120186
DUS1L	9:255939-261655	na	1	SRR7107702
FAM104A	9:6948612-6966741	na	1	SRR7107824
FERMT1	24:15748632-15785025	na	1	SRR7107680
FUCA1	2:75665473-75677087	na	1	SRR7107710
GRK3	26:19385059-19512528	na	1	SRR7107951
GTF2H5	1:47669196-47681370	na	1	SRR10596315
HELZ	9:13250374-13414545	na	1	SRR7107772
HGD	33:24066099-24107827	na	2	SRR7107556,SRR7107637
INTS12	32:26501635-26540258	na	1	SRR7107776
ISCU	26:18300800-18307504	na	1	SRR7107649
KATNBL1	30:865276-924874	na	2	SRR7107716,SRR7107772
KCMF1	17:39919102-40000397	na	3	SRR11193493,SRR11193499,SRR7107688
KCTD3	38:11016344-11059843	na	3	SRR2094406,SRR7107687,SRR7107932
KDELR1	1:107860187-107869522	na	2	SRR7107657,SRR7107658
KLHL5	3:73258925-73347262	na	1	SRR11193499
KPNB1	9:24004191-24031370	na	1	SRR7107815
LACTB	30:27720255-27738213	na	4	SRR7107527,SRR7107528,SRR7107530,SRR7107651,SRR7107810,SRR7107940
LAPTM5	2:70188382-70215361	na	2	SRR7107556,SRR7107637
LITAF	6:31229153-31259670	na	1	SRR7759803
LOC100685907	26:24966469-25026600	na	2	SRR5664964,SRR7107660
LOC102155597	12:71942184-71952238	na	1	SRR7107680
LOC111091691	2:30463473-30493775	na	1	SRR7107776
LOC111094603	38:11005497-11016425	na	2	SRR2094406,SRR7107687
LOC111097211	8:22896459-22923689	na	1	SRR7120192
LOC475707	17:21654516-21673817	na	4	SRR7107531,SRR2094398,SRR2094407,SRR7107816
MAPK9	11:1443528-1480501	na	3	SRR7759803,SRR7874815,SRR7874817
MKRN2OS	20:6027419-6034078	na	3	SRR7107649,SRR7107951,SRR7107952
MRRF	9:60256728-60314561	na	1	SRR8049186
MTCH2	18:42023484-42045331	na	1	SRR7107786
MTHFD2	17:48882838-48896816	na	1	SRR7107651
NDE1	6:28143244-28186069	na	1	SRR7107990
NDUFA2	2:35803452-35805530	na	2	SRR7107637,SRR7874817
NME2	9:27002114-27005600	na	1	SRR7107710
PARK7	5:61576219-61592325	na	1	SRR7107775
PDIA6	17:7653834-7674136	na	1	SRR8049186
PHB2	27:38075769-38080440	na	4	SRR7107556,SRR7107693,SRR7107794,SRR7107829
PI4K2B	3:84981785-85001702	na	2	SRR7120194,SRR7120201
PITHD1	2:75714592-75721301	na	1	SRR7107917
PPP1CC	26:8497350-8518189	na	6	SRR7107637,SRR11193499,SRR7107680,SRR7107702,SRR7107812,SRR7107837
PPP1R12A	15:22272291-22413440	na	1	SRR7107676
PSMB6	5:31776286-31778789	na	5	SRR7107609,SRR7107593,SRR7107558,SRR7107676,SRR7107905
PTEN	26:37853148-37913176	na	1	SRR7107829
PTP4A2	2:69222525-69238436	na	5	SRR7107556,SRR7107637,SRR7107815,SRR7107837,SRR7107538
PUDP	X:4185144-4325866	na	1	SRR8049186
QKI	1:51800294-51956891	na	4	SRR7107556,SRR2094408,SRR7107657,SRR7107658
RAB38	21:11769924-11823546	na	2	SRR7107771,SRR8049186
RGS17	1:43170815-43264277	na	1	SRR7107658
RHNO1	27:41885779-41906252	na	1	SRR7107840
SELENOT	23:45247088-45271229	na	1	SRR7107703
STARD5	3:56462153-56472187	na	2	SRR7107831,SRR7107860
STAU2	29:21995229-22283370	na	1	SRR7107688
STK16	37:25793993-25797632	na	14	SRR7107578,SRR7107581,SRR7107558,SRR7107592,SRR2095478,SRR7107698,SRR7107803,SRR7107840,SRR7107907,SRR7107971,SRR7107978,SRR7107979,SRR7107986,SRR7120157
SULT1C4	10:35494614-35504162	na	1	SRR8049186
SYAP1	X:12869824-12902677	na	1	SRR7107837
SYT14	7:8612458-8795812	na	1	SRR7107622
TARS1	4:74213475-74239056	na	1	SRR8049187
TBL1X	X:6222794-6432561	na	2	SRR7107575,SRR7107573
TLK2	9:10686424-10804885	na	3	SRR7759803,SRR7874815,SRR7874817
RO60	38:5975824-6004327	na	3	SRR7759803,SRR7874815,SRR7874817
TSEN15	7:17356210-17388036	na	1	SRR7107562
UBE2D3	32:24190897-24221627	na	135	SRR7107548,SRR7107535,SRR7107581,SRR7107609,SRR7107593,SRR7107556,SRR7107579,SRR7107632,SRR7107543,SRR7107544,SRR7107640,E356,E695,SRR7107558,IT221,SRR7107637,SRR7107592,SRR7107526,SRR7107527,SRR7107528,SRR7107530,SRR7107531,SRR7107594,SRR11193493,SRR11193499,SRR2094385,SRR2094392,SRR2094406,SRR2094409,SRR2095322,SRR2095362,SRR2095480,SRR2095487,SRR2095501,SRR7107562,SRR7107568,SRR7107652,SRR7107…
ULK2	5:40355070-40437758	na	2	SRR7107650,SRR7107652
UNC50	10:44057617-44073123	na	1	SRR8049186
USP12	25:12389360-12477406	na	1	SRR7107945
VPS4A	5:80327059-80340380	na	1	SRR7107771
ZFAND5	1:85420091-85429843	na	1	SRR7107650
ZNF182	X:41557362-41584417	na	1	SRR8049187
USP5	27:38158850-38172689	na	1	SRR8049186
SLC30A9	13:39053613-39138117	na	1	SRR8049187
SF3A2	20:56789450-56796004	na	5	SRR7107770,SRR7107771,SRR7107772,SRR8049186,SRR8049187
TBK1	10:7169664-7208890	na	2	SRR10596312,SRR7107696
LOC100855769	13:48296232-48682650	na	1	SRR8049186
TCP1	1:49029260-49038023	na	1	SRR7107701
SEPTIN8	11:21052833-21067337	na	1	SRR7107700
PPP4R2	20:19116122-19166927	na	1	SRR7107677
YEATS4	10:11364435-11382340	na	1	SRR7107696
SPIB	1:106294360-106301700	na	1	SRR7107694
