# Supplementary material for: Recent, full-length gene retrocopies are common in canids
Source: HighWire-hosted journal article supplement (doi:10.1101/gr.276828.122), 2022-08-01
Supplement: Supplemental_Table_S4.xlsx [file Supplemental_Table_S4.xlsx]

## Sheet: S4
Supplemental Table S4: Reference retroCNV
Parent_gene	Parent_location	RetrogeneDB_name	RetrogeneDB_location	Total_Canids_with_retroCNV	Percent_Identity	Insertion_site_analysis	Insertion_site_gene
ACTB	6:12421006-12424449	retro_cfam_120	3:63026693-63028463	288	98.83	intron_variant	QDPR
AKR1A1	15:14792398-14808592	retro_cfam_558	13:61866048-61867306	285	99.38	upstream_gene_variant	-
AKR1B1	14:2991905-3006622	retro_cfam_63	14:31644131-31645487	232	100	intergenic_variant	-
CNIH1	8:30365010-30379356	retro_cfam_697	16:14014340-14015852	291	96.53	intron_variant	-
CRYZ	6:71656162-71675692	retro_cfam_870	19:23936958-23938815	26	100	downstream_gene_variant	-
DCTN2	10:1620702-1634385	retro_cfam_1095	23:3616104-3617854	244	99.5	intron_variant	SUSD5
DEK	35:17014802-17045308	retro_cfam_1362	3:10278693-10281583	270	97.82	downstream_gene_variant	-
DNAJA1	11:50156089-50168379	retro_cfam_751	17:20982178-20983701	77	100	intron_variant	MAPRE3
DYNLT3	X:32603881-32611213	retro_cfam_1778	6:8817022-8818352	263	70.83	intergenic_variant	-
EIF3I	2:68977359-68986004	retro_cfam_321	1:78631663-78633111	291	93.25	intron_variant	-
EWSR1	26:22578782-22608174	retro_cfam_1889	7:71334895-71337298	197	98.34	downstream_gene_variant	-
FYTTD1	33:28920361-28947111	retro_cfam_1715	27:45855130-45856687	275	100	upstream_gene_variant	-
GPI	1:117922380-117948325	retro_cfam_2043	4:81393652-81395701	278	90.89	downstream_gene_variant	-
GSTP1	18:49905161-49908110	retro_cfam_937	X:10616445-10617244	272	100	upstream_gene_variant	-
HNRNPA1	27:1013459-1020083	retro_cfam_480	2:50259573-50261182	190	97.32	intron_variant	RNF180
HSDL2	11:66883021-66944844	retro_cfam_64	12:16125487-16127424	2	99.72	intron_variant	-
MAX	8:39441216-39465681	retro_cfam_1179	25:12498972-12499358	288	60.75	downstream_gene_variant	LOC111092373
MCMBP	28:29946228-29996625	retro_cfam_232	14:32120540-32123033	185	99.84	intergenic_variant	-
PFDN1	2:35454139-35519700	retro_cfam_1742	5:55058341-55059121	283	85.25	intron_variant	HSPB11
PFDN5	27:1906133-1909613	retro_cfam_1382	3:55023837-55024479	182	98.7	intergenic_variant	-
RAN	26:1435077-1436893	retro_cfam_1584	35:26048553-26049621	292	93.14	downstream_gene_variant	-
RBMX	X:107173599-107182404	retro_cfam_1914	8:45795288-45797356	266	97.19	intron_variant	RGS6
RER1	5:57278349-57288564	retro_cfam_1164	25:14958163-14959498	278	99.49	intron_variant	TNFRSF19
RPAP2	6:56564310-56644382	retro_cfam_106	1:73791917-73794463	112	94.6	downstream_gene_variant	-
RPL10A	12:4601760-4604142	retro_cfam_413	11:12281469-12282228	281	99.54	intron_variant	SNCAIP
RPL14	23:9907479-9911114	retro_cfam_31	3:14889544-14890534	36	100	intron_variant	KIAA0825
RPL27A	21:32099792-32102761	retro_cfam_145	24:34662403-34662951	249	100	intron_variant	NCOA3
RPL6	26:9970416-9975897	retro_cfam_36	X:44508907-44509884	33	100	downstream_gene_variant	-
RPL7	29:21881048-21884401	retro_cfam_338	10:772338-774006	283	85.71	intron_variant	RBMS2
RPLP0	26:16148463-16153614	retro_cfam_1580	35:13679239-13680369	86	95.27	downstream_gene_variant	-
RPS10	12:3713984-3720149	retro_cfam_92	29:33555275-33555895	263	99.39	upstream_gene_variant	-
RPS2	6:38966830-38968743	retro_cfam_1932	8:5138945-5139948	267	99.61	downstream_gene_variant	-
RPS20	29:7488481-7489850	retro_cfam_672	15:9190006-9190362	291	77.55	intron_variant	ZFYVE9
RPS3A	15:49066636-49071012	retro_cfam_103	32:1153426-1154492	288	98.86	upstream_gene_variant	-
RPS3A	15:49066636-49071012	retro_cfam_179	27:10147452-10148341	99	98.86	intron_variant	TMEM117
RPS6	11:39161422-39165148	retro_cfam_48	20:51302685-51303558	274	98.8	downstream_gene_variant	LOC100684878
RPSA	23:9070953-9077053	retro_cfam_994	20:49569145-49570207	273	100	downstream_gene_variant	-
RWDD4	16:46736128-46751062	retro_cfam_1281	28:21847797-21849298	177	96.72	downstream_gene_variant	-
SNAP23	30:9453931-9493506	retro_cfam_1876	7:37272526-37274013	293	83.44	intron_variant	TFB2M
SRP19	3:239651-245078	retro_cfam_1207	26:21782304-21783164	282	100	intron_variant	TTC28
SRP19	3:239651-245078	retro_cfam_1717	4:83591150-83592016	71	100	downstream_gene_variant	-
SSBP1	16:7445351-7461513	retro_cfam_782	17:51357322-51358045	120	100	downstream_gene_variant	-
TMBIM6	27:4921606-4944830	retro_cfam_876	19:31320171-31321106	244	100	intergenic_variant	-
TSR1	9:46421656-46432938	retro_cfam_104	12:16855780-16858581	275	99.31	downstream_gene_variant	LOC610053
UBA52	20:44477128-44480023	retro_cfam_1671	4:70238665-70239256	267	100	upstream_gene_variant	-
UBE2V1	24:36570172-36583383	retro_cfam_1005	21:10570419-10571133	82	100	upstream_gene_variant	-
ADH5	32:21249459-21261130	retro_cfam_14	12:23593149-23594625	27	100	downstream_gene_variant	-
C16prf87	1:113018957-113025838	retro_cfam_1054	22:35188887-35190448	172	100	upstream_gene_variant	C22H16orf87
CTSL	X:40844074-40845440	retro_cfam_43	X:40844058-40845471	278	100	downstream_gene_variant	USP11
FTH1	18:54466167-54468733	retro_cfam_150	11:39037308-39038271	9	100	intron_variant	DENND4C
FTL	1:107418457-107419923	retro_cfam_203	23:16294393-16295342	117	100	upstream_gene_variant	LOC102155200
LSM4	20:44707460-44720490	retro_cfam_1954	8:39018094-39019187	67	95.27	intron_variant,non_coding_transcript_variant	PPP1R36
MGST3	38:17670329-17691822	retro_cfam_35	13:13580730-13581401	241	100	downstream_gene_variant	-
NSA2	2:57304160-57311836	retro_cfam_70	7:38895061-38896211	281	98.84	intron_variant	-
RPL18A	20:45036543-45040009	retro_cfam_231	20:40739992-40740669	289	98.86	intron_variant	SPINK8
SF3A3	15:4595812-4620565	retro_cfam_176	13:7761960-7763733	175	100	downstream_gene_variant	-
SNRPG	10:68826250-68836755	retro_cfam_1984	9:37735133-37735704	142	100	intron_variant	-
ST13	10:24379997-24411764	retro_cfam_262	1:55086310-55087949	165	98.69	intron_variant	UNC93A
