# Supplementary material for: Recent, full-length gene retrocopies are common in canids
Source: HighWire-hosted journal article supplement (doi:10.1101/gr.276828.122), 2022-08-01
Supplement: Supplemental_table_S6.xlsx [file Supplemental_table_S6.xlsx]

## Sheet: S6
Supplemental Table S6: RetroCNV specific SNVs
Parent_gene	RetroCNV	SNV_location	Variant	Reference	Consequence	Amino_acid_change	Codon_change	Exon_number
NARS1	NARS1L1	1:18331260	T	C	synonymous_variant	S/S	tcC/tcT	EXON=9/15
NARS1	NARS1L1	1:18337155	A	G	missense_variant	R/Q	cGa/cAa	EXON=15/15
MEX3C	MEX3CL1	1:23835359	G	A	missense_variant	T/A	Act/Gct	EXON=2/2
MEX3C	MEX3CL1	1:23835918	A	G	missense_variant	R/H	cGt/cAt	EXON=2/2
RPS5	RPS5L1	1:99558843	T	G	missense_variant	R/S	Cgt/Agt	EXON=6/6
RPS5	RPS5L1	1:99559031	A	G	synonymous_variant	A/A	gcC/gcT	EXON=5/6
RPL13A	RPL13AL1	1:107010283	G	A	3_prime_UTR_variant	-	-	EXON=8/8
VASP	VASPL1	1:110054379	T	C	missense_variant	A/T	Gcc/Acc	EXON=4/13
XRCC1	XRCC1L1	1:111566242	T	C	synonymous_variant	S/S	agC/agT	EXON=5/17
XRCC1	XRCC1L1	1:111566744	T	C	synonymous_variant	L/L	Ctg/Ttg	EXON=7/17
XRCC1	XRCC1L1	1:111569618	T	C	missense_variant	A/V	gCa/gTa	EXON=13/17
SNRPA	SNRPAL1	1:113030703	C	T	5_prime_UTR_variant	-	-	EXON=1/7
RPL13A	RPL13AL1	1:107010503-107010504	ATTTTTTTTTTTTTT	ATTTTTTTTTTT	3_prime_UTR_variant	-	-	EXON=9/9
GTPBP4	GTPBP4L3	2:33945179	T	A	missense_variant	V/E	gTg/gAg	EXON=10/17
DND1	DND1L1	2:35825203	C	A	3_prime_UTR_variant	-	-	EXON=7/7
DND1	DND1L1	2:35826935	T	G	missense_variant	L/M	Ctg/Atg	EXON=3/4
GPBP1	GPBP1L1	2:44316381	C	T	3_prime_UTR_variant	-	-	EXON=13/13
SLC30A5	SLC30A5L1	2:54215503	G	T	missense_variant	L/W	tTg/tGg	EXON=2/16
SLC30A5	SLC30A5L1	2:54215568	C	T	missense_variant	F/L	Ttt/Ctt	EXON=2/16
CIAPIN1	CIAPIN1L1	2:58982889	G	T	missense_variant	F/L	ttT/ttG	EXON=2/9
CIAPIN1	CIAPIN1L1	2:58991494	G	C	missense_variant	A/G	gCg/gGg	EXON=8/9
FTO	FTOL1	2:61857924	A	G	synonymous_variant	I/I	atC/atT	EXON=8/9
FTO	FTOL1	2:61957487	T	C	missense_variant	R/H	cGc/cAc	EXON=3/9
RCC1	RCC1L1	2:71951580	T	C	missense_variant	G/S	Ggt/Agt	EXON=6/9
DET1	DET1L1	3:51748755	A	G	missense_variant	R/C	Cgc/Tgc	EXON=5/6
CLRN2	CLRN2L1	3:62958766	T	C	3_prime_UTR_variant	-	-	EXON=3/3
CLRN2	CLRN2L1	3:62961096	T	C	missense_variant	V/M	Gtg/Atg	EXON=2/3
DDX21	DDX21L1	4:20132861	G	A	3_prime_UTR_variant	-	-	EXON=15/15
AIFM2	AIFM2L1	4:21091859	A	G	missense_variant	L/F	Ctc/Ttc	EXON=5/9
AIFM2	AIFM2L1	4:21096691	T	C	missense_variant	S/N	aGc/aAc	EXON=1/9
ADK	ADKL1	4:24707115	C	T	synonymous_variant	S/S	tcT/tcC	EXON=4/11
ADK	ADKL1	4:24785203	C	A	missense_variant	I/L	Att/Ctt	EXON=5/11
ADK	ADKL1	4:24785257	A	G	missense_variant	V/M	Gtg/Atg	EXON=5/11
CCNG1	CCNG1L2	4:47801199	G	A	3_prime_UTR_variant	-	-	EXON=7/7
CCNG1	CCNG1L2	4:47808182	T	G	5_prime_UTR_variant	-	-	EXON=1/7
G3BP1	G3BP1L1	4:57558025	T	C	missense_variant	E/K	Gag/Aag	EXON=5/12
GRPEL2	GRPEL2L1	4:59605264	C	A	3_prime_UTR_variant	-	-	EXON=4/4
ADK	ADKL1	4:24885437-24885439	AAACA	AAACAACA	inframe_deletion	N/-	aACAga/aga	EXON=7/11
AURKB	AURKBL2	5:33015383	T	C	missense_variant	E/K	Gag/Aag	EXON=7/9
AURKB	AURKBL2	5:33016076	G	A	missense_variant	I/T	aTa/aCa	EXON=5/9
COPS3	COPS3L1	5:42147806	A	T	missense_variant	L/Q	cTg/cAg	EXON=2/12
ATG4C	ATG4CL1	5:47312364	G	C	missense_variant	V/L	Gtt/Ctt	EXON=4/10
CPT2	CPT2L1	5:55718350	G	A	3_prime_UTR_variant	-	-	EXON=7/7
CPT2	CPT2L1	5:55718685	T	C	missense_variant	V/M	Gtg/Atg	EXON=7/7
CPT2	CPT2L1	5:55718686	G	A	synonymous_variant	P/P	ccT/ccC	EXON=7/7
CPT2	CPT2L1	5:55726488	A	G	missense_variant	R/W	Cgg/Tgg	EXON=6/7
CPT2	CPT2L1	5:55726844	G	T	missense_variant	K/T	aAg/aCg	EXON=6/7
CPT2	CPT2L1	5:55726923	T	C	missense_variant	V/I	Gtc/Atc	EXON=6/7
CPT2	CPT2L1	5:55726928	G	T	missense_variant	D/A	gAc/gCc	EXON=6/7
CPT2	CPT2L1	5:55727103	C	T	missense_variant	I/V	Att/Gtt	EXON=6/7
CPT2	CPT2L1	5:55727111	G	A	missense_variant	L/P	cTg/cCg	EXON=6/7
CPT2	CPT2L1	5:55727324	C	T	missense_variant	Y/C	tAt/tGt	EXON=6/7
CPT2	CPT2L1	5:55727480	G	A	missense_variant	I/T	aTc/aCc	EXON=6/7
CPT2	CPT2L1	5:55727550	T	C	missense_variant	V/I	Gtc/Atc	EXON=6/7
CPT2	CPT2L1	5:55727576	C	T	missense_variant	D/G	gAt/gGt	EXON=6/7
CPT2	CPT2L1	5:55744584	G	T	missense_variant	Y/S	tAc/tCc	EXON=1/5
CPT2	CPT2L1	5:55744606	T	C	missense_variant	A/T	Gca/Aca	EXON=1/5
CPT2	CPT2L1	5:55744648	G	C	missense_variant	G/R	Ggc/Cgc	EXON=1/5
CPT2	CPT2L1	5:55744687	G	T	initiator_codon_variant	M/L	Atg/Ctg	EXON=1/5
CPT2	CPT2L1	5:55744709	G	GC	5_prime_UTR_variant	-	-	EXON=1/5
CPT2	CPT2L1	5:55744715	C	G	5_prime_UTR_variant	-	-	EXON=1/5
CPT2	CPT2L1	5:55744777	A	G	5_prime_UTR_variant	-	-	EXON=1/5
SBDS	SBDSL1	6:1256108	C	T	3_prime_UTR_variant	-	-	EXON=5/5
SBDS	SBDSL1	6:1262779	G	C	5_prime_UTR_variant	-	-	EXON=1/5
MAPK3	MAPK3L1	6:18109556	T	C	3_prime_UTR_variant	-	-	EXON=9/9
LOC479815	LOC479815L3	6:23638385	T	A	stop_gained	Y/*	taT/taA	EXON=10/14
LOC479912	LOC479912L1	6:42201777	A	T	3_prime_UTR_variant	-	-	EXON=8/8
LOC479912	LOC479912L1	6:42202678	A	AT	3_prime_UTR_variant	-	-	EXON=8/8
LOC479912	LOC479912L1	6:42202745	T	A	3_prime_UTR_variant	-	-	EXON=8/8
LOC479912	LOC479912L1	6:42202778	C	G	3_prime_UTR_variant	-	-	EXON=8/8
LOC479912	LOC479912L1	6:42202813	C	T	3_prime_UTR_variant	-	-	EXON=8/8
LOC479912	LOC479912L1	6:42202857	G	T	3_prime_UTR_variant	-	-	EXON=8/8
LOC479912	LOC479912L1	6:42202865	A	G	3_prime_UTR_variant	-	-	EXON=8/8
LOC479912	LOC479912L1	6:42202870	A	G	3_prime_UTR_variant	-	-	EXON=8/8
LOC479912	LOC479912L1	6:42203081	T	G	missense_variant	F/L	ttC/ttA	EXON=8/8
LOC479912	LOC479912L1	6:42203090	A	G	synonymous_variant	S/S	tcC/tcT	EXON=8/8
LOC479912	LOC479912L1	6:42205184	T	C	synonymous_variant	P/P	ccG/ccA	EXON=7/8
LOC479912	LOC479912L1	6:42205191	A	G	missense_variant	A/V	gCg/gTg	EXON=7/8
LOC479912	LOC479912L1	6:42205192	T	C	missense_variant	A/T	Gcg/Acg	EXON=7/8
LOC479912	LOC479912L1	6:42205224	G	A	missense_variant	L/P	cTg/cCg	EXON=7/8
LOC479912	LOC479912L1	6:42206384	A	G	missense_variant	T/M	aCg/aTg	EXON=5/8
ABCD3	ABCD3L1	6:54744539	T	G	missense_variant	T/N	aCc/aAc	EXON=20/21
LOC479912	LOC479912L1	6:42203026-42203027	GCCCCCCCCCC	GCCCCCCC	3_prime_UTR_variant	-	-	EXON=8/8
TMEM183A	TMEM183AL1	7:167332	G	A	synonymous_variant	N/N	aaT/aaC	EXON=8/8
TMEM183A	TMEM183AL1	7:171019	T	A	missense_variant	M/K	aTg/aAg	EXON=6/8
PACC1	PACC1L1	7:10568122	T	C	3_prime_UTR_variant	-	-	EXON=8/8
PACC1	PACC1L1	7:10568182	T	A	3_prime_UTR_variant	-	-	EXON=8/8
PACC1	PACC1L1	7:10568816	C	G	3_prime_UTR_variant	-	-	EXON=8/8
PACC1	PACC1L1	7:10573105	A	C	missense_variant	W/L	tGg/tTg	EXON=6/8
PACC1	PACC1L1	7:10580849	A	G	synonymous_variant	T/T	acC/acT	EXON=3/8
TFB2M	TFB2ML1	7:37265945	T	C	missense_variant	V/I	Gta/Ata	EXON=6/8
TFB2M	TFB2ML1	7:37274108	C	A	missense_variant	M/R	aTg/aGg	EXON=3/8
IMPACT	IMPACTL1	7:63948493	T	G	3_prime_UTR_variant	-	-	EXON=8/8
HOMEZ	HOMEZL1	8:3545645	G	A	3_prime_UTR_variant	-	-	EXON=2/2
HOMEZ	HOMEZL1	8:3546335	C	T	3_prime_UTR_variant	-	-	EXON=2/2
HOMEZ	HOMEZL1	8:3546400	T	C	3_prime_UTR_variant	-	-	EXON=2/2
HOMEZ	HOMEZL1	8:3547024	T	C	missense_variant	R/Q	cGg/cAg	EXON=2/2
HOMEZ	HOMEZL1	8:3547067	A	G	missense_variant	R/C	Cgt/Tgt	EXON=2/2
HOMEZ	HOMEZL1	8:3547598	T	C	missense_variant	A/T	Gca/Aca	EXON=2/2
HOMEZ	HOMEZL1	8:3547937	T	A	missense_variant	C/S	Tgc/Agc	EXON=2/2
HOMEZ	HOMEZL1	8:3553384	A	G	5_prime_UTR_variant	-	-	EXON=1/2
HOMEZ	HOMEZL1	8:3553420	A	G	5_prime_UTR_variant	-	-	EXON=1/2
AP1G2	AP1G2L1	8:3787422	T	A	stop_gained	Y/*	taT/taA	EXON=9/14
SIX4	SIX4L1	8:35739341	C	T	3_prime_UTR_variant	-	-	EXON=3/3
SGPP1	SGPP1L1	8:38197322	C	A	3_prime_UTR_variant	-	-	EXON=3/3
ATP6V1D	ATP6V1DL4	8:41335931	G	C	missense_variant	E/Q	Gaa/Caa	EXON=6/9
EIF2B2	EIF2B2L2	8:48110591	A	G	missense_variant	S/N	aGc/aAc	EXON=1/8
PSMB5	PSMB5L1	8:3344261-3344271	GA	GAGCGTAAAAAAA	3_prime_UTR_variant	-	-	EXON=3/3
HOMEZ	HOMEZL1	8:3546104-3546107	CAGA	CAGAGAGA	3_prime_UTR_variant	-	-	EXON=2/2
HOMEZ	HOMEZL1	8:3546586-3546591	ATCATCGTCAtc	ATCATCGTCATCGTCAtc	inframe_deletion	DD/-	gaCGATGAt/gat	EXON=2/2
TEX2	TEX2L1	9:12024574	G	A	3_prime_UTR_variant	-	-	EXON=12/12
TEX2	TEX2L1	9:12024897	T	C	3_prime_UTR_variant	-	-	EXON=12/12
TEX2	TEX2L1	9:12025253	T	C	3_prime_UTR_variant	-	-	EXON=12/12
TEX2	TEX2L1	9:12025373	A	C	3_prime_UTR_variant	-	-	EXON=12/12
TEX2	TEX2L1	9:12025374	A	C	3_prime_UTR_variant	-	-	EXON=12/12
TEX2	TEX2L1	9:12025456	G	T	3_prime_UTR_variant	-	-	EXON=12/12
TEX2	TEX2L1	9:12059685	A	G	missense_variant	A/V	gCg/gTg	EXON=5/12
TEX2	TEX2L1	9:12061379	G	C	missense_variant	A/P	Gct/Cct	EXON=4/12
TEX2	TEX2L1	9:12081399	T	C	missense_variant	E/K	Gag/Aag	EXON=2/12
TEX2	TEX2L1	9:12081486	T	C	missense_variant	A/T	Gct/Act	EXON=2/12
NMT1	NMT1L1	9:18428323	A	G	missense_variant	T/M	aCg/aTg	EXON=10/13
LSM12	LSM12L1	9:19327924	T	C	3_prime_UTR_variant	-	-	EXON=5/5
MRPL45	MRPL45L1	9:23829910	G	T	3_prime_UTR_variant	-	-	EXON=8/8
MRPL45	MRPL45L1	9:23830096	T	C	missense_variant	G/E	gGa/gAa	EXON=8/8
COIL	COILL2	9:31754215	T	C	missense_variant	G/S	Ggc/Agc	EXON=2/7
RNFT1	RNFT1L1	9:34436597	C	A	missense_variant	W/G	Tgg/Ggg	EXON=5/9
GOSR1	GOSR1L3	9:44532835	C	T	3_prime_UTR_variant	-	-	EXON=9/9
TAX1BP3	TAX1BP3L2	9:47492920	A	C	3_prime_UTR_variant	-	-	EXON=4/4
TAX1BP3	TAX1BP3L2	9:47493267	A	G	synonymous_variant	L/L	Cta/Tta	EXON=4/4
SPOUT1	SPOUT1L1	9:54802208	A	G	5_prime_UTR_variant	-	-	EXON=1/12
SPOUT1	SPOUT1L1	9:54802209	A	C	5_prime_UTR_variant	-	-	EXON=1/12
SPOUT1	SPOUT1L1	9:54809361	A	G	synonymous_variant	A/A	gcG/gcA	EXON=12/12
SPOUT1	SPOUT1L1	9:54809997	A	C	3_prime_UTR_variant	-	-	EXON=12/12
TEX2	TEX2L1	9:12024882-12024883	GATAT	GAT	3_prime_UTR_variant	-	-	EXON=12/12
ZBED4	ZBED4L1	10:17316197	C	A	missense_variant	S/R	agT/agG	EXON=2/2
ZBED4	ZBED4L1	10:17317108	G	A	missense_variant	C/R	Tgc/Cgc	EXON=3/3
ATF4	ATF4L1	10:25530872	G	A	5_prime_UTR_variant	-	-	EXON=1/3
ATF4	ATF4L1	10:25530902	G	A	5_prime_UTR_variant	-	-	EXON=1/3
ATF4	ATF4L1	10:25530911	T	C	5_prime_UTR_variant	-	-	EXON=1/3
CTNNA1	CTNNA1L3	11:26452720	T	C	missense_variant	S/L	tCg/tTg	EXON=13/18
UBAP2	UBAP2L1	11:50681215	A	G	missense_variant	A/V	gCg/gTg	EXON=24/25
UBAP2	UBAP2L1	11:50685218	C	T	missense_variant	K/E	Aaa/Gaa	EXON=19/26
UBAP2	UBAP2L1	11:50697824	A	G	missense_variant	S/L	tCa/tTa	EXON=14/26
UBAP2	UBAP2L1	11:50697825	G	A	missense_variant	S/P	Tca/Cca	EXON=14/26
UBAP2	UBAP2L1	11:50709908	T	C	missense_variant	A/T	Gct/Act	EXON=9/26
TMEM38B	TMEM38BL1	11:61538202	T	A	missense_variant	I/F	Att/Ttt	EXON=3/6
GLO1	GLO1L3	12:7584847	T	C	3_prime_UTR_variant	-	-	EXON=6/6
PTP4A1	PTP4A1L4	12:27052422	T	C	3_prime_UTR_variant	-	-	EXON=6/6
PTP4A1	PTP4A1L1	12:27052439	G	T	3_prime_UTR_variant	-	-	EXON=6/6
NDUFAF4	NDUFAF4L2	12:55319825	A	G	5_prime_UTR_variant	-	-	EXON=1/3
LAPTM4B	LAPTM4BL2	13:41140	T	G	5_prime_UTR_variant	-	-	EXON=1/7
LAPTM4B	LAPTM4BL2	13:41221	G	C	5_prime_UTR_variant	-	-	EXON=1/7
LAPTM4B	LAPTM4BL2	13:41305	C	T	initiator_codon_variant	M/T	aTg/aCg	EXON=1/7
LAPTM4B	LAPTM4BL2	13:127035	A	G	3_prime_UTR_variant	-	-	EXON=7/7
FAM91A1	FAM91A1L1	13:22077593	T	A	3_prime_UTR_variant	-	-	EXON=23/23
FAM91A1	FAM91A1L1	13:22078983	C	T	3_prime_UTR_variant	-	-	EXON=24/24
LOC111098614	LOC111098614L2	13:45478996	A	G	non_coding_transcript_exon_variant	-	-	EXON=3/3
CLOCK	CLOCKL1	13:47688426	G	A	3_prime_UTR_variant	-	-	EXON=22/22
RUFY3	RUFY3L1	13:60049586	A	T	missense_variant	S/T	Tct/Act	EXON=2/18
COX18	COX18L1	13:61881876	T	C	missense_variant	V/M	Gtg/Atg	EXON=4/6
LAPTM4B	LAPTM4BL2	13:41169-41170	CGGCGAGCGGGCGAGCGGGCGAGCGGGC	CGGCGAGCGGGCGAGCGGGC	5_prime_UTR_variant	-	-	EXON=1/7
MEAF6	MEAF6L1	15:4965068	C	T	3_prime_UTR_variant	-	-	EXON=7/7
APEX1	APEX1L3	15:17789180	A	G	3_prime_UTR_variant	-	-	EXON=5/5
PNP	PNPL1	15:17815549	A	T	missense_variant	L/Q	cTg/cAg	EXON=6/6
PAWR	PAWRL1	15:22117143	A	G	3_prime_UTR_variant	-	-	EXON=6/6
PAWR	PAWRL1	15:22117740	A	T	3_prime_UTR_variant	-	-	EXON=6/6
SOCS2	SOCS2L1	15:33785701	A	G	5_prime_UTR_variant	-	-	EXON=2/3
GSTK1	GSTK1L1	16:6416030	T	C	synonymous_variant	P/P	ccG/ccA	EXON=1/8
ACSL1	ACSL1L1	16:45783375	T	G	missense_variant	M/I	atG/atT	EXON=6/21
ACSL1	ACSL1L1	16:45784210	A	G	missense_variant	G/D	gGc/gAc	EXON=7/21
ACSL1	ACSL1L1	16:45788643	A	C	missense_variant	A/D	gCt/gAt	EXON=10/21
ACSL1	ACSL1L1	16:45794384	A	G	missense_variant	R/Q	cGg/cAg	EXON=12/21
ACSL1	ACSL1L1	16:45804700	T	C	3_prime_UTR_variant	-	-	EXON=21/21
ACSL1	ACSL1L1	16:45804983	G	A	3_prime_UTR_variant	-	-	EXON=21/21
ACSL1	ACSL1L1	16:45804984	G	A	3_prime_UTR_variant	-	-	EXON=21/21
ACSL1	ACSL1L1	16:45805257	C	G	3_prime_UTR_variant	-	-	EXON=21/21
WWC2	WWC2L1	16:47015362	A	G	3_prime_UTR_variant	-	-	EXON=22/22
YWHAQ	YWHAQL1	17:6661535	C	T	missense_variant	E/G	gAa/gGa	EXON=6/6
C17H2orf68	C17H2orf68L1	17:39474415	A	C	3_prime_UTR_variant	-	-	EXON=5/5
C17H2orf68	C17H2orf68L1	17:39477044	G	T	3_prime_UTR_variant	-	-	EXON=5/5
MRPL53	MRPL53L3	17:48664241	T	G	3_prime_UTR_variant	-	-	EXON=3/3
CSDE1	CSDE1L1	17:52427897	T	G	synonymous_variant	I/I	atC/atA	EXON=14/20
SF3B4	SF3B4L5	17:59212764	T	G	synonymous_variant	P/P	ccC/ccA	EXON=3/6
DPY30	DPY30L1	17:25368374-25368375	ATTTTTT	ATTTTT	3_prime_UTR_variant	-	-	EXON=5/5
PNPLA8	PNPLA8L1	18:12158511	C	T	missense_variant	M/T	aTg/aCg	EXON=6/9
LOC102153599	LOC102153599L2	18:17723351	T	A	3_prime_UTR_variant	-	-	EXON=3/4
CAPRIN1	CAPRIN1L1	18:33698149	T	C	3_prime_UTR_variant	-	-	EXON=18/18
TMEM216	TMEM216L1	18:55014630	G	A	missense_variant	F/S	tTc/tCc	EXON=4/5
TMEM216	TMEM216L1	18:55017872	A	G	synonymous_variant	F/F	ttC/ttT	EXON=2/5
TMEM216	TMEM216L1	18:55017899	G	C	synonymous_variant	L/L	ctG/ctC	EXON=2/5
DNAJC24	DNAJC24L1	18:35945867-35945868	ATTTTTTTT	ATTTTTTT	3_prime_UTR_variant	-	-	EXON=5/5
ADAD1	ADAD1L1	19:17807610	C	T	missense_variant	K/R	aAa/aGa	EXON=8/12
DDX18	DDX18L5	19:32015767	A	G	3_prime_UTR_variant	-	-	EXON=14/14
DDX18	DDX18L5	19:32024054	C	G	missense_variant	A/G	gCc/gGc	EXON=6/14
DDX18	DDX18L5	19:32028448	T	C	missense_variant	G/E	gGa/gAa	EXON=2/14
CNBP	CNBPL1	20:2926161	A	G	5_prime_UTR_variant	-	-	EXON=2/5
CHCHD4	CHCHD4L1	20:4273992	C	G	missense_variant	P/A	Ccg/Gcg	EXON=2/3
CHCHD4	CHCHD4L1	20:4281478	A	G	5_prime_UTR_variant	-	-	EXON=1/3
H1-8	H1-8L1	20:5614927	A	C	3_prime_UTR_variant	-	-	EXON=5/5
H1-8	H1-8L1	20:5614977	A	G	missense_variant	S/L	tCa/tTa	EXON=5/5
H1-8	H1-8L1	20:5615055	G	A	missense_variant	M/T	aTg/aCg	EXON=5/5
GPX1	GPX1L1	20:39889940	C	T	missense_variant	F/S	tTc/tCc	EXON=2/2
DNAJB1	DNAJB1L1	20:48129067	C	T	synonymous_variant	L/L	ctT/ctC	EXON=3/4
DCAF15	DCAF15L1	20:48521740	T	C	missense_variant	A/T	Gcc/Acc	EXON=9/15
DCAF15	DCAF15L1	20:48527278	A	G	missense_variant	A/V	gCg/gTg	EXON=2/15
PTBP1	PTBP1L3	20:57807865	T	G	3_prime_UTR_variant	-	-	EXON=14/14
PTBP1	PTBP1L4	20:57808506	A	G	synonymous_variant	L/L	Ctg/Ttg	EXON=12/14
PTBP1	PTBP1L3	20:57808664	T	A	missense_variant	N/K	aaT/aaA	EXON=11/14
PTBP1	PTBP1L3	20:57810418	T	G	missense_variant	A/E	gCg/gAg	EXON=9/14
PTBP1	PTBP1L3	20:57811650	C	T	missense_variant	Y/C	tAc/tGc	EXON=8/14
PTBP1	PTBP1L3	20:57812537	T	G	synonymous_variant	I/I	atC/atA	EXON=4/14
PTBP1	PTBP1L3	20:57812952	C	T	synonymous_variant	G/G	ggA/ggG	EXON=3/14
PTBP1	PTBP1L3	20:57806903-57806908	Ga	GCAGACaa	3_prime_UTR_variant	-	-	EXON=14/14
CHORDC1	CHORDC1L1	21:10129883	C	T	5_prime_UTR_variant	-	-	EXON=1/11
THAP12	THAP12L3	21:22316634	C	T	3_prime_UTR_variant	-	-	EXON=5/5
TRIM6	TRIM6L1	21:28603922	A	G	synonymous_variant	V/V	gtG/gtA	EXON=3/9
TRIM6	TRIM6L1	21:28604316	C	G	missense_variant	E/Q	Gag/Cag	EXON=3/9
TRIM6	TRIM6L1	21:28605945	T	C	synonymous_variant	V/V	gtC/gtT	EXON=5/9
SVIP	SVIPL1	21:44408820	T	C	3_prime_UTR_variant	-	-	EXON=4/4
SVIP	SVIPL1	21:44409166	G	A	3_prime_UTR_variant	-	-	EXON=4/4
SVIP	SVIPL5	21:44409586	G	A	3_prime_UTR_variant	-	-	EXON=4/4
RRAS2	RRAS2L1	21:37038311-37038312	ACCC	ACC	3_prime_UTR_variant	-	-	EXON=6/6
PCID2	PCID2L1	22:60602771	T	C	3_prime_UTR_variant	-	-	EXON=16/16
PCID2	PCID2L1	22:60604332	A	G	synonymous_variant	I/I	atC/atT	EXON=13/16
PCID2	PCID2L1	22:60606484	T	C	synonymous_variant	T/T	acG/acA	EXON=11/16
TBC1D5	TBC1D5L1	23:25516960	C	T	synonymous_variant	F/F	ttT/ttC	EXON=8/24
SH3BP5	SH3BP5L1	23:27327797	A	G	synonymous_variant	A/A	gcG/gcA	EXON=5/9
SH3BP5	SH3BP5L1	23:27327843	C	G	missense_variant	A/P	Gcc/Ccc	EXON=5/9
SH3BP5	SH3BP5L1	23:27327871	A	T	missense_variant	M/K	aTg/aAg	EXON=5/9
SH3BP5	SH3BP5L1	23:27330148	T	C	missense_variant	P/S	Ccc/Tcc	EXON=7/9
SH3BP5	SH3BP5L1	23:27332973	A	G	missense_variant	A/T	Gcc/Acc	EXON=8/9
SH3BP5	SH3BP5L1	23:27333070	G	A	missense_variant	E/G	gAg/gGg	EXON=8/9
SH3BP5	SH3BP5L1	23:27333199	T	C	missense_variant	S/F	tCc/tTc	EXON=8/9
SH3BP5	SH3BP5L1	23:27333717	A	C	synonymous_variant	R/R	Cgg/Agg	EXON=9/9
SH3BP5	SH3BP5L1	23:27334013	G	A	3_prime_UTR_variant	-	-	EXON=9/9
SH3BP5	SH3BP5L1	23:27334117	C	G	3_prime_UTR_variant	-	-	EXON=9/9
SH3BP5	SH3BP5L1	23:27334119	A	T	3_prime_UTR_variant	-	-	EXON=9/9
SH3BP5	SH3BP5L1	23:27334195	A	G	3_prime_UTR_variant	-	-	EXON=9/9
SH3BP5	SH3BP5L1	23:27334377	C	T	3_prime_UTR_variant	-	-	EXON=9/9
SH3BP5	SH3BP5L1	23:27334456	G	A	3_prime_UTR_variant	-	-	EXON=9/9
SH3BP5	SH3BP5L1	23:27334601	A	G	3_prime_UTR_variant	-	-	EXON=9/9
SH3BP5	SH3BP5L1	23:27334769	T	A	3_prime_UTR_variant	-	-	EXON=9/9
LXN	LXNL1	23:51966386	A	G	missense_variant	A/V	gCa/gTa	EXON=3/6
LXN	LXNL1	23:51968406	C	G	5_prime_UTR_variant	-	-	EXON=1/6
SNX5	SNX5L1	24:5103976	C	T	missense_variant	Y/H	Tat/Cat	EXON=8/13
TGM2	TGM2L1	24:26647147	A	G	missense_variant	R/C	Cgt/Tgt	EXON=6/13
NCOA5	NCOA5L1	24:33325264	A	G	missense_variant	P/L	cCt/cTt	EXON=7/7
HMGB1	HMGB1L7	25:9556757	C	A	3_prime_UTR_variant	-	-	EXON=5/5
GTF3A	GTF3AL1	25:12172989	T	C	missense_variant	A/T	Gcc/Acc	EXON=6/7
XBP1	XBP1L1	26:22164245	T	C	missense_variant	A/T	Gca/Aca	EXON=4/5
PES1	PES1L5	26:23656414	T	C	missense_variant	R/K	aGg/aAg	EXON=15/15
ZNF70	ZNF70L1	26:28757301	C	G	synonymous_variant	A/A	gcG/gcC	EXON=2/2
ZNF70	ZNF70L1	26:28757355	A	G	synonymous_variant	A/A	gcG/gcA	EXON=2/2
ZNF70	ZNF70L1	26:28757940	T	C	synonymous_variant	Y/Y	taC/taT	EXON=2/2
ZNF70	ZNF70L1	26:28758006	T	C	synonymous_variant	H/H	caC/caT	EXON=2/2
MZT2B	MZT2BL2	26:30420375	C	T	missense_variant	Y/H	Tac/Cac	EXON=1/3
MINPP1	MINPP1L1	26:37585521	A	G	5_prime_UTR_variant	-	-	EXON=1/4
PPHLN1	PPHLN1L1	27:11447458	C	T	3_prime_UTR_variant	-	-	EXON=9/9
PPHLN1	PPHLN1L1	27:11447769	A	G	3_prime_UTR_variant	-	-	EXON=9/9
PPHLN1	PPHLN1L1	27:11448112	T	C	synonymous_variant	E/E	gaG/gaA	EXON=9/9
PPHLN1	PPHLN1L1	27:11531366	T	C	missense_variant	R/K	aGa/aAa	EXON=4/9
C27H12orf57	C27H12orf57L1	27:38102751	A	G	missense_variant	R/W	Cgg/Tgg	EXON=2/3
TPI1	TPI1L2	27:38155366	A	T	missense_variant	K/M	aAg/aTg	EXON=6/7
TEAD4	TEAD4L1	27:41748949	T	C	3_prime_UTR_variant	-	-	EXON=10/10
TEAD4	TEAD4L1	27:41759347	G	A	missense_variant	L/P	cTg/cCg	EXON=8/10
TEAD4	TEAD4L1	27:41760535	G	C	missense_variant	Q/H	caG/caC	EXON=7/10
SLC35G1	SLC35G1L1	28:8090863	T	C	3_prime_UTR_variant	-	-	EXON=5/5
CCNJ	CCNJL1	28:9509220	A	G	3_prime_UTR_variant	-	-	EXON=5/5
CACUL1	CACUL1L1	28:29009392	G	A	3_prime_UTR_variant	-	-	EXON=8/8
SFXN4	SFXN4L1	28:29371565	C	G	3_prime_UTR_variant	-	-	EXON=15/15
SFXN4	SFXN4L1	28:29371611	G	C	3_prime_UTR_variant	-	-	EXON=15/15
SFXN4	SFXN4L1	28:29371630	A	G	3_prime_UTR_variant	-	-	EXON=15/15
SFXN4	SFXN4L1	28:29371660	C	A	3_prime_UTR_variant	-	-	EXON=15/15
SFXN4	SFXN4L1	28:29371689	A	C	3_prime_UTR_variant	-	-	EXON=15/15
SFXN4	SFXN4L1	28:29371695	G	C	3_prime_UTR_variant	-	-	EXON=15/15
SFXN4	SFXN4L1	28:29371700	G	A	3_prime_UTR_variant	-	-	EXON=15/15
SFXN4	SFXN4L1	28:29377311	G	A	missense_variant	L/S	tTg/tCg	EXON=14/15
SFXN4	SFXN4L1	28:29379050	A	G	missense_variant	T/I	aCa/aTa	EXON=13/15
SFXN4	SFXN4L1	28:29383583	G	A	synonymous_variant	A/A	gcT/gcC	EXON=12/15
SFXN4	SFXN4L1	28:29383610	A	G	synonymous_variant	G/G	ggC/ggT	EXON=12/15
SFXN4	SFXN4L1	28:29383664	A	G	synonymous_variant	V/V	gtC/gtT	EXON=12/15
SFXN4	SFXN4L1	28:29384710	T	C	missense_variant	R/Q	cGg/cAg	EXON=11/15
SFXN4	SFXN4L1	28:29384726	A	G	missense_variant	R/C	Cgt/Tgt	EXON=11/15
SFXN4	SFXN4L1	28:29385367	A	G	synonymous_variant	Y/Y	taC/taT	EXON=10/15
SFXN4	SFXN4L1	28:29388822	G	A	synonymous_variant	L/L	ctT/ctC	EXON=5/15
SFXN4	SFXN4L1	28:29393312	A	G	synonymous_variant	G/G	ggC/ggT	EXON=2/15
SFXN4	SFXN4L1	28:29393334	A	G	missense_variant	A/V	gCg/gTg	EXON=2/15
SFXN4	SFXN4L1	28:29393352	T	C	missense_variant	R/Q	cGg/cAg	EXON=2/15
SFXN4	SFXN4L1	28:29393358	T	C	missense_variant	G/E	gGg/gAg	EXON=2/15
SFXN4	SFXN4L1	28:29393359	T	C	missense_variant	G/R	Ggg/Agg	EXON=2/15
SFXN4	SFXN4L1	28:29393361	T	C	missense_variant	R/H	cGc/cAc	EXON=2/15
SFXN4	SFXN4L1	28:29393364	T	C	missense_variant	R/Q	cGa/cAa	EXON=2/15
SFXN4	SFXN4L1	28:29393368	T	C	missense_variant	A/T	Gcc/Acc	EXON=2/15
SFXN4	SFXN4L1	28:29393369	T	C	synonymous_variant	A/A	gcG/gcA	EXON=2/15
SFXN4	SFXN4L1	28:29393388	A	G	missense_variant	P/L	cCg/cTg	EXON=2/15
SFXN4	SFXN4L1	28:29393589	C	CG	frameshift_variant	SGAAT...HRGV*(379 aa)/RAQPP*	agCggcgcagcc...agaggggtatag(1137 nt)/agggcgcagccaccctag	EXON=1/15
PRDX3	PRDX3L1	28:29395793	G	C	3_prime_UTR_variant	-	-	EXON=7/7
PRDX3	PRDX3L2	28:29395816	C	G	3_prime_UTR_variant	-	-	EXON=7/7
PRDX3	PRDX3L2	28:29395887	C	T	3_prime_UTR_variant	-	-	EXON=7/7
PRDX3	PRDX3L1	28:29396072	C	T	3_prime_UTR_variant	-	-	EXON=7/7
PRDX3	PRDX3L1	28:29396230	C	T	3_prime_UTR_variant	-	-	EXON=7/7
GLRX3	GLRX3L1	28:38748120	C	T	missense_variant	S/P	Tct/Cct	EXON=7/11
SFXN4	SFXN4L1	28:29371492-29371493	AGCCCTCCCCCGGGC	AGC	3_prime_UTR_variant	-	-	EXON=15/15
SFXN4	SFXN4L1	28:29371603-29371604	CAG	CG	3_prime_UTR_variant	-	-	EXON=15/15
PRDX3	PRDX3L1	28:29395917-29395920	CTATG	CTATGTATG	3_prime_UTR_variant	-	-	EXON=7/7
SDCBP	SDCBPL5	29:9331933	G	C	5_prime_UTR_variant	-	-	EXON=1/9
SDCBP	SDCBPL6	29:9367329	G	A	missense_variant	R/G	Aga/Gga	EXON=7/9
SDCBP	SDCBPL6	29:9370169	T	C	3_prime_UTR_variant	-	-	EXON=9/9
NBN	NBNL1	29:35439107	G	T	synonymous_variant	T/T	acA/acC	EXON=11/16
NBN	NBNL1	29:35470348	T	C	synonymous_variant	K/K	aaG/aaA	EXON=5/16
NBN	NBNL1	29:35473387	A	G	missense_variant	T/M	aCg/aTg	EXON=3/15
NBN	NBNL1	29:35474480	T	C	missense_variant	V/I	Gta/Ata	EXON=2/15
KNSTRN	KNSTRNL2	30:7563374	A	G	missense_variant	G/S	Ggc/Agc	EXON=2/8
KNSTRN	KNSTRNL2	30:7573177	A	C	3_prime_UTR_variant	-	-	EXON=8/8
MAPK6	MAPK6L1	30:17722254	C	T	missense_variant	L/P	cTc/cCc	EXON=2/6
MAPK6	MAPK6L1	30:17722327-17722328	CTTT	CTT	frameshift_variant	LVFSA...KHLN*(691 aa)/FGFFCCRQ*	ttggttttttct...catctgaactaa(2073 nt)/ttTggttttttctgctgtagacaatga	EXON=2/6
KNSTRN	KNSTRNL2	30:7573024-7573033	AAGG	AAGGACAGTTTAGG	3_prime_UTR_variant	-	-	EXON=8/8
LTN1	LTN1L1	31:23989885	T	C	synonymous_variant	S/S	tcG/tcA	EXON=9/30
HMGN1	HMGN1L3	31:34275460	T	A	3_prime_UTR_variant	-	-	EXON=7/7
HMGN1	HMGN1L2	31:34275665	G	A	3_prime_UTR_variant	-	-	EXON=7/7
NDUFV3	NDUFV3L2	31:37130681	T	C	synonymous_variant	N/N	aaC/aaT	EXON=4/4
HNRNPDL	HNRNPDLL9	32:6403353	C	T	3_prime_UTR_variant	-	-	EXON=7/7
LOC102154096	LOC102154096L1	32:6842973	T	A	non_coding_transcript_exon_variant	-	-	EXON=6/6
LOC102154096	LOC102154096L1	32:6843700	G	T	non_coding_transcript_exon_variant	-	-	EXON=6/6
LOC102154096	LOC102154096L1	32:6851524	G	A	non_coding_transcript_exon_variant	-	-	EXON=1/6
LOC102154096	LOC102154096L1	32:6851691	C	T	non_coding_transcript_exon_variant	-	-	EXON=1/6
LOC102154096	LOC102154096L1	32:6851728	T	C	non_coding_transcript_exon_variant	-	-	EXON=1/6
PAPSS1	PAPSS1L2	32:28209674	T	C	missense_variant	A/T	Gct/Act	EXON=4/12
PCNP	PCNPL2	33:7976472	A	C	3_prime_UTR_variant	-	-	EXON=5/5
GAP43	GAP43L12	33:19724164	G	A	synonymous_variant	K/K	aaA/aaG	EXON=2/3
GTF2E1	GTF2E1L1	33:24153171	T	C	5_prime_UTR_variant	-	-	EXON=2/7
GTF2E1	GTF2E1L1	33:24156544	T	C	synonymous_variant	Y/Y	taC/taT	EXON=4/8
GTF2E1	GTF2E1L1	33:24186503	A	G	3_prime_UTR_variant	-	-	EXON=5/5
BLOC1S5	BLOC1S5L1	35:7977046	T	C	missense_variant	E/K	Gaa/Aaa	EXON=3/5
LOC478720	LOC478720L2	35:10454611	T	C	5_prime_UTR_variant	-	-	EXON=1/6
LOC478720	LOC478720L2	35:10455821	A	G	5_prime_UTR_variant	-	-	EXON=2/6
LOC478720	LOC478720L2	35:10456205	T	C	synonymous_variant	H/H	caC/caT	EXON=3/6
LOC478720	LOC478720L2	35:10456220	C	T	synonymous_variant	G/G	ggT/ggC	EXON=3/6
LOC478720	LOC478720L2	35:10461858	C	G	3_prime_UTR_variant	-	-	EXON=6/6
LOC478720	LOC478720L2	35:10462082	A	G	3_prime_UTR_variant	-	-	EXON=6/6
LOC478720	LOC478720L2	35:10462141	C	T	3_prime_UTR_variant	-	-	EXON=6/6
LOC478720	LOC478720L2	35:10462238	C	T	3_prime_UTR_variant	-	-	EXON=6/6
ACOT13	ACOT13L1	35:22707313	C	T	5_prime_UTR_variant	-	-	EXON=1/3
ACOT13	ACOT13L1	35:22707331	T	C	5_prime_UTR_variant	-	-	EXON=1/3
ACOT13	ACOT13L1	35:22707389	T	C	synonymous_variant	H/H	caC/caT	EXON=1/3
ACOT13	ACOT13L1	35:22712485	A	G	5_prime_UTR_variant	-	-	EXON=2/4
ACOT13	ACOT13L1	35:22722888	A	T	3_prime_UTR_variant	-	-	EXON=3/3
ACOT13	ACOT13L1	35:22723110	A	G	3_prime_UTR_variant	-	-	EXON=3/3
OLA1	OLA1L1	36:18319173	A	G	synonymous_variant	D/D	gaC/gaT	EXON=3/10
OLA1	OLA1L1	36:18319200	A	G	synonymous_variant	A/A	gcC/gcT	EXON=3/10
OLA1	OLA1L1	36:18323683	G	A	synonymous_variant	N/N	aaT/aaC	EXON=2/10
NAB1	NAB1L1	37:1241985	A	T	3_prime_UTR_variant	-	-	EXON=7/7
C37H2orf69	C37H2orf69L1	37:9103485	A	G	missense_variant	R/H	cGt/cAt	EXON=2/2
C37H2orf69	C37H2orf69L1	37:9104680	A	G	3_prime_UTR_variant	-	-	EXON=2/2
FARSB	FARSBL1	37:28647252	C	T	missense_variant	I/V	Att/Gtt	EXON=16/16
EIF2S3	EIF2S3L1	X:19662893	T	C	synonymous_variant	H/H	caC/caT	EXON=2/12
EIF2S3	EIF2S3L1	X:19664238	A	G	missense_variant	D/N	Gac/Aac	EXON=4/12
EIF2S3	EIF2S3L1	X:19669143	G	A	missense_variant	K/E	Aag/Gag	EXON=7/12
EIF2S3	EIF2S3L1	X:19669161	G	C	missense_variant	P/A	Cca/Gca	EXON=7/12
EIF2S3	EIF2S3L1	X:19671902	A	G	missense_variant	G/D	gGt/gAt	EXON=9/12
EIF2S3	EIF2S3L1	X:19671960	C	T	synonymous_variant	I/I	atT/atC	EXON=9/12
EIF2S3	EIF2S3L1	X:19671969	C	T	synonymous_variant	L/L	ctT/ctC	EXON=9/12
EIF2S3	EIF2S3L1	X:19673512	A	G	missense_variant	A/T	Gca/Aca	EXON=10/12
EIF2S3	EIF2S3L1	X:19673587	T	C	missense_variant	R/C	Cgt/Tgt	EXON=10/12
EIF2S3	EIF2S3L1	X:19674031	T	C	stop_gained	R/*	Cga/Tga	EXON=11/12
EIF2S3	EIF2S3L1	X:19679869	A	G	3_prime_UTR_variant	-	-	EXON=12/12
EIF2S3	EIF2S3L1	X:19680000	A	T	3_prime_UTR_variant	-	-	EXON=12/12
EIF2S3	EIF2S3L1	X:19680062	C	T	3_prime_UTR_variant	-	-	EXON=12/12
EIF2S3	EIF2S3L1	X:19680093	C	T	3_prime_UTR_variant	-	-	EXON=12/12
EIF2S3	EIF2S3L1	X:19680160	T	C	3_prime_UTR_variant	-	-	EXON=12/12
ARHGEF9	ARHGEF9L1	X:49312479	G	C	5_prime_UTR_variant	-	-	EXON=1/10
PRR32	PRR32L1	X:98040795	A	G	stop_gained	W/*	tgG/tgA	EXON=2/2
RPL10	RPL10L1	X:122099096	T	A	synonymous_variant	S/S	tcA/tcT	EXON=2/5
G6PD	G6PDL1	X:122219547	A	G	synonymous_variant	D/D	gaC/gaT	EXON=8/13
