# Supplementary material for: Recent, full-length gene retrocopies are common in canids
Source: HighWire-hosted journal article supplement (doi:10.1101/gr.276828.122), 2022-08-01
Supplement: Supplemental_Table_S11.xlsx [file Supplemental_Table_S11.xlsx]

## Sheet: S10
Supplemental Table S11: RetroCNV with significantly increased Fst between breed clades
RetroCNV	Fst	Insert_location	Insertion_site_gene	Total_dogs	Breed_clades
NDUFAF4L1	0.483766	2:6242423-6242444	LOC111091106	5	Alpine;
FGF4L2	0.439393	12:33710166-33710178	-	16	Alpine; European_Mastiff; Poodle; Spaniel; Terrier; UK_Rural;
RHEBL1	0.430108	9:27506566-27506581	CA10	4	Mediterranean;
RPS2	0.430108	8:5138945-5139948	-	155	Mediterranean;
S100PL4	0.413427	34:34324611-34324631	-	13	Asian_Spitz; Mediterranean; New_World;
PREPL1	0.403463	8:7565459-7565475	-	5	New_World; Poodle;
ARHGAP5L1	0.399333	5:18750413-18750430	-	9	Alpine; Continental_Herder;
RPS16L1	0.399333	3:26720828-26720840	-	9	Alpine; Continental_Herder;
ARPC1BL1	0.397727	14:34916675-34916690	-	5	Continental_Herder;
NAA20L1	0.394753	18:34191916-34191933	KIAA1549L	9	European_Mastiff; Poodle; Spaniel; UK_Rural;
RESTL1	0.388139	12:36658275-36658284	COL12A1	13	Spaniel; Terrier; UK_Rural;
NAP1L1L2	0.364897	17:29923085-29923100	LOC102154187	7	Continental_Herder; New_World;
NAP1L1L3	0.35839	18:49079285-49079285	IGHMBP2	11	Continental_Herder; New_World; Pointer_Setter; Poodle;
C16prf87	0.350407	22:35188887-35190448	C22H16orf87	113	Alpine; Asian_Spitz; Continental_Herder; European_Mastiff; Mediterranean; New_World; Pointer_Setter; Retriever; Terrier; UK_Rural;
FAM133BL4	0.348155	29:31980926-31981012	CA2	8	Asian_Spitz;
RPL10L1	0.348155	3:32009305-32009323	NIPA1	8	Asian_Spitz;
ST13	0.341755	1:55086310-55087949	UNC93A	107	Alpine; Asian_Spitz; Continental_Herder; European_Mastiff; Mediterranean; New_World; Pointer_Setter; Poodle; Retriever; Spaniel; Terrier; UK_Rural;
LSM2L1	0.340755	22:35508014-35508030	-	13	Asian_Spitz; Poodle; Retriever; Terrier;
FGF4L1	0.336651	18:20443708-20443726	-	15	Terrier; UK_Rural;
EIF4BL3	0.336496	18:16670414-16670429	RELN	14	Alpine; Continental_Herder; New_World; Retriever; Terrier;
ARF3L1	0.334787	25:17577138-17577152	CRYL1	11	Alpine; Mediterranean; Pointer_Setter; Spaniel;
RPL35L3	0.331689	16:23812424-23812434	ANK1	7	Continental_Herder; Pointer_Setter;
ZBED4L1	0.328386	14:21231603-21231621	DYNC1I1	9	Alpine; Asian_Spitz; Continental_Herder;
ELOF1L1	0.320513	15:399941-399954	-	3	Mediterranean;
LOC111098057L3	0.320513	22:4500976-4500990	HTR2A	3	Mediterranean;
NAP1L1L5	0.320513	32:13158855-13158870	MMRN1	3	Pointer_Setter;
PTP4A1L3	0.320513	23:19796004-19796019	-	3	Mediterranean;
SLC46A3L1	0.320513	33:12017221-12017237	-	3	Mediterranean;
ATXN10L1	0.316129	8:35710540-35710565	-	4	Continental_Herder;
LGALS3L1	0.316129	38:4896334-4896350	-	4	Continental_Herder;
PTBP1L4	0.316129	29:34960204-34960227	-	4	Continental_Herder;
AUNIPL1	0.314671	3:59142806-59142823	-	44	Alpine; Continental_Herder; European_Mastiff; Mediterranean; Pointer_Setter; Retriever; Spaniel; Terrier; UK_Rural;
RETREG3L1	0.310144	37:18523374-18523393	-	9	Mediterranean; Poodle; Spaniel; Terrier;
FKBP3L2	0.30719	23:16784083-16784099	SLC4A7	6	Alpine; European_Mastiff;
EWSR1	0.303355	7:71334895-71337298	-	106	Alpine; Asian_Spitz; Continental_Herder; European_Mastiff; Mediterranean; New_World; Poodle; Retriever; Terrier; UK_Rural;
CNBPL1	0.302632	32:8865676-8865693	ARHGAP24	7	Asian_Spitz;
CTNNBL1L1	0.302632	5:79943082-79943098	WWP2	7	Asian_Spitz;
LOC486776L3	0.302401	12:61426267-61426285	-	8	Alpine; European_Mastiff; Poodle;
DPY30L1	0.298976	2:52721020-52721036	LOC111092486	11	Continental_Herder; Pointer_Setter; Poodle; Retriever;
CCNG1L2	0.29608	13:28246118-28246128	-	12	Asian_Spitz; Mediterranean; Pointer_Setter; Poodle;
SNW1L1	0.291613	8:43240132-43240145	SLC39A9	5	New_World; Poodle;
VIL1L1	0.291613	6:4232332-4232332	-	5	Mediterranean; New_World;
STIP1L2	0.291483	3:48910791-48910809	-	7	Asian_Spitz; New_World; Pointer_Setter; Spaniel;
STIP1L11	0.29072	25:12267768-12267781	-	61	Alpine; Asian_Spitz; Continental_Herder; European_Mastiff; Mediterranean; New_World; Poodle; Retriever; Spaniel; Terrier; UK_Rural;
SFXN4L1	0.289994	25:45486836-45486851	-	106	Alpine; Asian_Spitz; European_Mastiff; Mediterranean; Pointer_Setter; Retriever; Spaniel; Terrier; UK_Rural;
SAR1BL1	0.289989	6:37379004-37379024	LOC111096314	45	Alpine; Continental_Herder; European_Mastiff; New_World; Pointer_Setter; Poodle; Retriever; Spaniel; Terrier;
CHCHD4L2	0.286538	11:39883165-39883176	-	3	Spaniel;
GOLGA7L1	0.286538	11:51415321-51415338	LOC111098086	3	Alpine;
UBE2D1L1	0.274914	11:42184072-42184087	-	4	Asian_Spitz; New_World;
ZNF667L1	0.272549	9:17523283-17523299	-	6	UK_Rural;
AURKAL2	0.270592	31:8423162-8423179	ROBO1	8	Asian_Spitz; New_World;
NSDHLL1	0.270187	14:35081891-35081910	-	49	Alpine; Asian_Spitz; European_Mastiff; Mediterranean; New_World; Pointer_Setter; Poodle; Retriever; Spaniel; Terrier; UK_Rural;
PTMAL2	0.26716	18:34252104-34252122	KIAA1549L	9	Asian_Spitz; Mediterranean;
HIBCHL1	0.266121	2:39378744-39378762	-	35	Alpine; Asian_Spitz; Continental_Herder; New_World; Pointer_Setter; Poodle; Retriever; Spaniel; Terrier;
ZNF667L2	0.265813	13:50634550-50634566	-	6	Poodle; Spaniel; UK_Rural;
LOC102154281L1	0.26254	32:6728467-6728483	SCD5	22	Alpine; European_Mastiff; Mediterranean; New_World; Poodle; Retriever; Terrier;
SDAD1L7	0.257973	25:2301889-2301904	-	99	Alpine; Asian_Spitz; Continental_Herder; European_Mastiff; Mediterranean; Pointer_Setter; Poodle; Retriever; Terrier; UK_Rural;
CHCHD4L1	0.255487	5:29794489-29794503	-	35	Alpine; Asian_Spitz; Continental_Herder; Mediterranean; New_World; Poodle; Retriever; Spaniel; Terrier; UK_Rural;
ITSN1L1	0.25199	31:6637771-6637787	-	28	Alpine; Continental_Herder; European_Mastiff; New_World; Pointer_Setter; Poodle; Retriever; Spaniel; Terrier; UK_Rural;
MZT2BL2	0.247742	23:420593-420611	-	4	Retriever;
SUMO2L2	0.246416	25:20382010-20382027	NEK1	24	Asian_Spitz; European_Mastiff; Mediterranean; Terrier; UK_Rural;
SDAD1L9	0.246366	X:43612267-43612284	SHROOM4	25	Asian_Spitz; Continental_Herder; European_Mastiff; Pointer_Setter; Poodle; Retriever; Spaniel; Terrier; UK_Rural;
FARSBL2	0.240909	21:14758136-14758153	DLG2	10	Asian_Spitz; European_Mastiff; Mediterranean; Poodle; Retriever; UK_Rural;
GOSR1L3	0.235577	24:33841746-33841768	SLC13A3	3	Continental_Herder;
SF3B4L2	0.235577	8:22625008-22625024	FANCM	3	Continental_Herder;
EIF3KL1	0.234339	23:9681614-9681630	MYRIP	8	European_Mastiff; Poodle; Retriever; Terrier;
PRELID3BL1	0.226935	8:61848722-61848739	RPS6KA5	10	European_Mastiff; Mediterranean; New_World; Pointer_Setter; Spaniel;
DDX18L5	0.226731	21:42853777-42853796	NELL1	108	Alpine; Asian_Spitz; Continental_Herder; European_Mastiff; Mediterranean; New_World; Pointer_Setter; Poodle; Retriever; Spaniel; Terrier; UK_Rural;
LOC111098614L2	0.226423	13:15707962-15707981	-	47	Alpine; Asian_Spitz; Continental_Herder; European_Mastiff; Mediterranean; Pointer_Setter; Poodle; Retriever; Spaniel; Terrier; UK_Rural;
VDAC2L3	0.22495	33:30836789-30836807	XXYLT1	77	Alpine; Asian_Spitz; Continental_Herder; European_Mastiff; Mediterranean; Pointer_Setter; Poodle; Retriever; Spaniel; Terrier; UK_Rural;
UBXN2AL2	0.223004	22:54124635-54124648	-	52	Alpine; Continental_Herder; European_Mastiff; Mediterranean; New_World; Pointer_Setter; Poodle; Retriever; Spaniel; Terrier; UK_Rural;
TRIM6L1	0.222357	1:25203580-25203596	-	38	Alpine; Asian_Spitz; Continental_Herder; European_Mastiff; Mediterranean; New_World; Pointer_Setter; Retriever; Spaniel; Terrier; UK_Rural;
C7H18orf21L1	0.219996	32:3355088-3355104	-	51	Alpine; Continental_Herder; European_Mastiff; Mediterranean; New_World; Pointer_Setter; Poodle; Retriever; Spaniel; Terrier; UK_Rural;
SNRPB2L2	0.218436	9:53808172-53808187	GPR107	12	Mediterranean; Pointer_Setter; Terrier;
PFDN5	0.217253	3:55023837-55024479	-	110	Alpine; Asian_Spitz; Continental_Herder; Mediterranean; New_World; Pointer_Setter; Poodle; Retriever; Spaniel; Terrier; UK_Rural;
LOC479912L1	0.21713	20:14194521-14194536	-	74	Alpine; Asian_Spitz; Continental_Herder; European_Mastiff; Mediterranean; New_World; Pointer_Setter; Poodle; Retriever; Spaniel; Terrier; UK_Rural;
PES1L3	0.214038	7:21430397-21430415	RASAL2	14	Continental_Herder; Retriever; Terrier; UK_Rural;
PSMA1L1	0.213358	3:73548636-73548650	TLR1	5	Asian_Spitz;
CBX3L3	0.212114	17:34674936-34674953	KCNIP3	39	Alpine; Asian_Spitz; Continental_Herder; Mediterranean; Pointer_Setter; Poodle; Retriever; Terrier; UK_Rural;
GAP43L5	0.209907	10:31704499-31704517	CRY1	24	Alpine; Continental_Herder; European_Mastiff; Mediterranean; New_World; Pointer_Setter; Poodle; Retriever; UK_Rural;
PPHLN1L1	0.209125	17:27584005-27584020	-	84	Alpine; Asian_Spitz; Continental_Herder; European_Mastiff; Mediterranean; New_World; Pointer_Setter; Poodle; Retriever; Spaniel; Terrier; UK_Rural;
TMEM216L1	0.208718	15:57390655-57390668	-	47	Alpine; Asian_Spitz; Continental_Herder; Mediterranean; New_World; Pointer_Setter; Poodle; Retriever; Spaniel; Terrier; UK_Rural;
TROAPL1	0.208442	8:49711449-49711464	ANGEL1	5	Retriever; Spaniel;
EMC6L1	0.207655	1:88398840-88398856	PIP5K1B	11	Alpine; Asian_Spitz; Terrier;
AK6L7	0.203348	36:19200959-19201020	LOC111094254	21	Alpine; Asian_Spitz; Continental_Herder; New_World; Poodle; Retriever; Terrier; UK_Rural;
HINT1L3	0.198553	7:11144855-11144874	ANGEL2	46	Alpine; Asian_Spitz; Continental_Herder; European_Mastiff; Mediterranean; New_World; Pointer_Setter; Poodle; Retriever; Spaniel; Terrier; UK_Rural;
EI24L1	0.195678	1:49336613-49336615	SLC22A2	68	Alpine; Asian_Spitz; European_Mastiff; Mediterranean; New_World; Pointer_Setter; Poodle; Retriever; Spaniel; Terrier; UK_Rural;
C9H9orf78L1	0.194648	7:50859008-50859026	-	22	Continental_Herder; European_Mastiff; Pointer_Setter; Poodle; Retriever; Terrier; UK_Rural;
SPOUT1L1	0.19399	38:15164281-15164294	-	31	Alpine; Asian_Spitz; Continental_Herder; European_Mastiff; Mediterranean; New_World; Poodle; Retriever; Spaniel; Terrier; UK_Rural;
IDI1L1	0.192709	22:41020205-41020222	-	39	Alpine; Asian_Spitz; Continental_Herder; European_Mastiff; Pointer_Setter; Poodle; Retriever; Spaniel; Terrier; UK_Rural;
LOC106558478L1	0.192494	X:74407215-74407233	-	41	Alpine; Asian_Spitz; Continental_Herder; European_Mastiff; Mediterranean; New_World; Pointer_Setter; Poodle; Retriever; Terrier; UK_Rural;
PRR3L4	0.191025	13:62072649-62072664	AFP	72	Alpine; Asian_Spitz; Continental_Herder; European_Mastiff; Mediterranean; New_World; Pointer_Setter; Poodle; Retriever; Spaniel; Terrier; UK_Rural;
SELENOFL1	0.189301	4:66318538-66318555	-	51	Alpine; Asian_Spitz; Continental_Herder; European_Mastiff; Mediterranean; Pointer_Setter; Retriever; Spaniel; Terrier; UK_Rural;
ADKL1	0.188768	1:47668298-47668317	SERAC1	77	Alpine; Asian_Spitz; Continental_Herder; European_Mastiff; Mediterranean; New_World; Pointer_Setter; Poodle; Retriever; Spaniel; Terrier; UK_Rural;
NDFIP1L1	0.188422	25:21566119-21566135	-	6	Asian_Spitz; Pointer_Setter; Retriever;
SRP19	0.186947	4:83591150-83592016	-	28	Alpine; Asian_Spitz; Continental_Herder; Mediterranean; Retriever; Spaniel; Terrier; UK_Rural;
BLOC1S5L1	0.158678	23:27162327-27162346	EAF1	23	Alpine; Continental_Herder; European_Mastiff; Retriever; Terrier; UK_Rural;
