# Supplementary material for: Recent, full-length gene retrocopies are common in canids
Source: HighWire-hosted journal article supplement (doi:10.1101/gr.276828.122), 2022-08-01
Supplement: Supplemental_Table_S12.xlsx [file Supplemental_Table_S12.xlsx]

## Sheet: S11
Supplemental Table S12: RetroCNV examined for evidence of expression in 6 Golden Retrievers
RetroCNV_name	Insert_location	E270	E356	E360	E361	E669	E695	Expressed	RetroCNV_specific_SNV	Retrocopy_SNP_expressed	Chimeric_reads	Discordant_reads	5'_UTR_sequence	VEP	Insertion_site_gene
SBDSL1	18:39992934-39992948	1	1	0	0	0	0	yes	chr6:1256552	present	Chimeric with LOC100686934	present	present	5_prime_UTR_variant	LOC100686934
RPL37AL1	9:44472642-44472659	1	0	0	1	0	0	yes	n/a	n/a	n/a	present	n/a	downstream_gene_variant	CPD
FARSBL1	15:1203210-1203224	1	1	1	1	1	1	yes	n/a	n/a	n/a	present	n/a	intergenic_variant	-
RTCAL1	31:25246930-25246948	0	1	1	1	1	1	yes	n/a	n/a	n/a	present	no	intergenic_variant	-
C7H18orf21L1	32:3355088-3355104	1	1	1	1	1	1	yes	n/a	n/a	n/a	present	no	intergenic_variant	-
LSM2L1	22:35508014-35508030	1	0	0	0	0	0	yes	n/a	n/a	n/a	present	no	intergenic_variant	-
TEAD4L1	34:40439194-40439211	1	0	0	0	0	0	yes	chr27:41748949	present	no	no	n/a	intergenic_variant	-
FTOL1	3:42178903-42178920	1	1	1	1	0	1	yes	chr2:61857924	no	Chimeric with FAM169B	no	present	intron_variant	FAM169B
COILL2	32:11410796-11410812	1	0	1	0	0	0	yes	n/a	n/a	Chimeric with LOC111093685	present	present	intron_variant	PKD2/LOC111093685
ATP6V1DL4	38:3593063-3593082	0	1	1	1	1	1	yes	n/a	n/a	Chimeric with LOC111094552	present	present	intron_variant	LOC111094552
VDAC2L3	33:30836789-30836807	0	1	1	1	1	1	yes	n/a	n/a	no	present	no	intron_variant	XXYLT1
VMA21L1	25:19946777-19946777	1	0	1	1	1	0	yes	chrX:119435439	no	no	no	present	intron_variant	LOC477353
PKML1	13:7921729-7921746	0	1	0	1	0	1	yes	n/a	n/a	n/a	present	n/a	upstream_gene_variant	-
RPL13AL1	7:77545094-77545106	1	0	0	1	1	0	yes	n/a	n/a	n/a	present	n/a	upstream_gene_variant	MPPE1
SAR1BL1	6:37379004-37379024	0	1	0	1	1	0	no	n/a	n/a	n/a	no	n/a	downstream_gene_variant	LOC111096314
AMTL1	21:30106761-30107585	1	1	1	1	1	1	no	n/a	n/a	n/a	no	n/a	downstream_gene_variant	LOC611042
STIP1L11	25:12267768-12267781	0	1	0	0	0	0	no	n/a	n/a	n/a	no	n/a	downstream_gene_variant	-
ARMT1L1	20:12680966-12680982	1	0	0	0	0	0	no	n/a	n/a	n/a	no	no	downstream_gene_variant	LOC102151882
EIF4EL7	28:11546283-11546297	1	1	1	1	1	1	no	n/a	n/a	n/a	no	no	downstream_gene_variant	HPS1
MARCKSL1L1	1:108061224-108061238	1	1	1	1	1	1	no	n/a	n/a	n/a	no	no	downstream_gene_variant	LOC484411
PSMA1L2	4:7516174-7516193	0	1	0	0	0	0	no	n/a	n/a	n/a	no	n/a	intergenic_variant	-
NUSAP1L3	16:28714092-28714106	0	1	0	0	0	0	no	n/a	n/a	n/a	no	n/a	intergenic_variant	-
DHFRL3	7:22243467-22243482	1	0	0	1	0	0	no	n/a	n/a	n/a	no	n/a	intergenic_variant	-
ZFAND6L1	12:64227107-64227124	0	1	1	1	1	0	no	n/a	n/a	n/a	no	n/a	intergenic_variant	-
ELOCL3	15:9768621-9768636	0	0	0	0	1	0	no	n/a	n/a	n/a	no	n/a	intergenic_variant	-
IDI1L1	22:41020205-41020222	0	0	1	0	0	0	no	n/a	n/a	n/a	no	n/a	intergenic_variant	-
UBXN2AL2	22:54124635-54124648	0	1	0	0	1	1	no	n/a	n/a	n/a	no	n/a	intergenic_variant	-
FAM133BL3	26:7406518-7406534	1	1	0	0	0	1	no	n/a	n/a	n/a	no	n/a	intergenic_variant	-
HSP90AB1L3	X:72288006-72288024	0	1	0	0	0	1	no	n/a	n/a	n/a	no	n/a	intergenic_variant	-
LOC111098614L2	13:15707962-15707981	0	0	0	0	0	1	no	n/a	n/a	n/a	no	n/a	intergenic_variant	-
MAPK6L1	6:40495604-40495618	1	1	1	1	0	1	no	n/a	n/a	n/a	no	n/a	intergenic_variant	-
RPL28L2	22:37743769-37743782	0	0	1	0	0	1	no	n/a	n/a	n/a	no	n/a	intergenic_variant	-
FBXO22L1	1:100923150-100923167	1	0	1	0	1	0	no	n/a	n/a	n/a	no	no	intergenic_variant	-
PRR3L2	3:16544930-16544945	0	0	0	0	1	1	no	n/a	n/a	n/a	no	no	intergenic_variant	-
AUNIPL1	3:59142806-59142823	1	1	1	1	0	1	no	n/a	n/a	n/a	no	no	intergenic_variant	-
SELENOFL1	4:66318538-66318555	1	0	0	1	1	0	no	n/a	n/a	n/a	no	no	intergenic_variant	-
LOC486776L2	7:23682997-23683015	0	0	0	1	0	0	no	n/a	n/a	n/a	no	no	intergenic_variant	-
EWSR1L1	7:34021565-34021582	1	1	1	0	1	1	no	n/a	n/a	n/a	no	no	intergenic_variant	-
EIF2DL1	8:33362077-33362092	0	0	1	0	0	0	no	n/a	n/a	n/a	no	no	intergenic_variant	-
PRPF18L1	12:30160989-30161008	0	0	1	1	1	1	no	n/a	n/a	n/a	no	no	intergenic_variant	-
PDLIM1L1	12:44747915-44747933	0	1	0	0	0	0	no	n/a	n/a	n/a	no	no	intergenic_variant	-
CUL4AL1	13:12069093-12069110	0	0	1	0	0	0	no	n/a	n/a	n/a	no	no	intergenic_variant	-
ACTR2L1	13:15409290-15409307	0	0	1	0	0	0	no	n/a	n/a	n/a	no	no	intergenic_variant	-
ZNF667L2	13:50634550-50634566	0	0	0	1	0	1	no	n/a	n/a	n/a	no	no	intergenic_variant	-
NSDHLL1	14:35081891-35081910	1	1	1	1	1	1	no	n/a	n/a	n/a	no	no	intergenic_variant	-
RBM11L1	16:45073361-45073363	1	1	0	0	0	0	no	n/a	n/a	n/a	no	no	intergenic_variant	-
DPPA2L1	17:54191364-54191380	0	1	0	1	0	0	no	n/a	n/a	n/a	no	no	intergenic_variant	-
PRR3L8	18:36625207-36625224	0	0	0	0	1	1	no	n/a	n/a	n/a	no	no	intergenic_variant	-
BRK1L6	21:22878140-22879262	0	0	0	1	1	0	no	n/a	n/a	n/a	no	no	intergenic_variant	-
METAP2L1	23:40992178-40992189	0	1	0	1	0	1	no	n/a	n/a	n/a	no	no	intergenic_variant	-
SDAD1L7	25:2301889-2301904	1	1	1	1	1	1	no	n/a	n/a	n/a	no	no	intergenic_variant	-
NDFIP1L1	25:21566119-21566135	1	1	1	1	1	0	no	n/a	n/a	n/a	no	no	intergenic_variant	-
PNRC1L4	36:29962999-29963017	0	0	0	0	1	0	no	n/a	n/a	n/a	no	no	intergenic_variant	-
UBE2V2L2	38:10004218-10004233	0	1	0	1	0	0	no	n/a	n/a	n/a	no	no	intergenic_variant	-
LOC106558478L1	X:74407215-74407233	0	1	0	0	0	1	no	n/a	n/a	n/a	no	no	intergenic_variant	-
TRIM6L1	1:25203580-25203596	0	0	0	0	1	0	no	n/a	n/a	n/a	no	no	intergenic_variant	-
DTD2L1	22:38912311-38912326	1	1	1	1	1	1	no	n/a	n/a	n/a	no	no	intergenic_variant	-
GTF2E1L1	1:66556421-66556441	1	1	1	1	1	1	no	chr33:24156544	no	n/a	no	n/a	intergenic_variant	-
OLA1L1	8:45341910-45341926	1	1	1	1	1	0	no	chr36:18319200	no	n/a	no	n/a	intergenic_variant	-
TMEM216L1	15:57390655-57390668	1	0	0	1	0	0	no	chr18:55017899	no	n/a	no	n/a	intergenic_variant	-
PPHLN1L1	17:27584005-27584020	1	1	1	1	1	1	no	chr27:11447458	no	n/a	no	n/a	intergenic_variant	-
LOC479912L1	20:14194521-14194536	1	0	0	1	0	0	no	chr6:42205184	no	n/a	no	n/a	intergenic_variant	-
SFXN4L1	25:45486836-45486851	1	1	1	1	1	0	no	chr28:29384710	no	n/a	no	n/a	intergenic_variant	-
G3BP1L1	18:30609500-30609518	1	1	1	1	1	1	no	chr4:57552799	no	n/a	no	no	intergenic_variant	-
PNPLA8L1	X:69557068-69557085	0	1	0	0	0	0	no	chr18:12158511	no	n/a	no	no	intergenic_variant	-
SDCBPL6	20:15418379-15418395	1	1	0	1	0	1	no	chr29:9369376	no	n/a	no	no	intergenic_variant	-
AURKBL2	32:21028089-21028105	0	0	0	0	1	1	no	chr5:33015383	no	n/a	no	no	intergenic_variant	-
ACOT13L1	25:15141998-15142011	1	1	1	0	1	0	no	chr35:22707331	no	n/a	no	no	intergenic_variant	-
EIF2S3L1	8:14124302-14124318	1	1	0	0	0	1	no	chr39:19669143	no	n/a	no	no	intergenic_variant	-
PRR3L4	13:62072649-62072664	0	0	0	0	1	1	no	n/a	n/a	n/a	no	no	intron_variant	AFP
C9H9orf16L2	17:21903829-21903851	1	1	1	1	1	1	no	n/a	n/a	no	no	no	intron_variant	RBKS
ADKL1	1:47668298-47668317	1	1	1	1	0	1	no	chr4:24785203	no	no	no	no	intron_variant	SERAC1
PTBP1L3	29:31417276-31417295	0	0	0	0	0	1	no	chr20:57812537	no	n/a	no	n/a	intron_variant	RALYL
CIAPIN1L1	23:45531993-45532010	0	0	0	0	1	0	no	chr2:58982889	no	n/a	no	no	intron_variant	CLRN1
DHFRL2	2:12078552-12078567	1	0	1	1	0	0	no	n/a	n/a	no	no	n/a	intron_variant	NEBL
PDCD5L1	2:22929345-22929363	0	0	1	1	1	1	no	n/a	n/a	no	no	n/a	intron_variant	LOC102156435
CPSF6L1	3:37001309-37001325	0	0	1	1	0	1	no	n/a	n/a	no	no	n/a	intron_variant	CHRNA7
PPIL1L1	3:72311757-72311776	1	1	1	1	0	0	no	n/a	n/a	no	no	n/a	intron_variant	N4BP2
RPS18L1	5:60615769-60615787	0	0	1	0	1	0	no	n/a	n/a	no	no	n/a	intron_variant	CAMTA1
PES1L3	7:21430397-21430415	0	0	1	1	1	0	no	n/a	n/a	no	no	n/a	intron_variant	RASAL2
DDX31L1	8:15866486-15866501	0	0	1	1	1	1	no	n/a	n/a	no	no	n/a	intron_variant	MIPOL1
PFDN6L1	10:35050963-35050977	1	0	0	0	0	1	no	n/a	n/a	no	no	n/a	intron_variant	CCDC138
CBX1L1	11:45224673-45224689	0	0	0	0	1	1	no	n/a	n/a	no	no	n/a	intron_variant	IFT74
PTP4A1L2	12:65323947-65324132	0	1	1	1	1	0	no	n/a	n/a	no	no	n/a	intron_variant	AFG1L
APEX1L1	17:26699988-26699988	0	1	0	0	0	0	no	n/a	n/a	no	no	n/a	intron_variant	LOC111090425
CBX3L3	17:34674936-34674953	0	0	0	0	0	1	no	n/a	n/a	no	no	n/a	intron_variant	KCNIP3
DENRL1	28:9230983-9230998	1	1	1	1	1	1	no	n/a	n/a	no	no	n/a	intron_variant	ENTPD1
NUSAP1L1	1:108662656-108662671	0	1	0	1	1	1	no	n/a	n/a	no	no	no	intron_variant	C5AR1
RAC1L1	4:7690088-7690104	1	0	1	1	1	1	no	n/a	n/a	no	no	no	intron_variant	DISC1
UBE2CL2	6:16972522-16972539	1	1	1	1	1	1	no	n/a	n/a	no	no	no	intron_variant	ITGAM
CE10L1	8:73448222-73448240	0	0	1	0	0	0	no	n/a	n/a	no	no	no	intron_variant	LOC106559110
RWDD1L2	9:11426985-11427004	1	0	0	1	0	0	no	n/a	n/a	no	no	no	intron_variant	TANC2
TAF10L1	10:48277776-48277791	1	0	0	0	0	0	no	n/a	n/a	no	no	no	intron_variant	PRKCE
PRKG2L1	12:23823302-23823317	0	0	0	0	0	1	no	n/a	n/a	no	no	no	intron_variant	DST
TMPOL1	15:47615097-47615112	1	0	0	1	0	1	no	n/a	n/a	no	no	no	intron_variant	IQCM
PPP2CAL1	17:35601832-35601849	1	1	0	0	0	1	no	n/a	n/a	no	no	no	intron_variant	ACOXL
EIF1AXL4	27:21876226-21876243	0	0	1	0	0	0	no	n/a	n/a	no	no	no	intron_variant	LMNTD1
LOC479901L1	32:26587696-26587712	0	1	1	1	0	1	no	n/a	n/a	no	no	no	intron_variant	GSTCD
COX16L2	X:56417571-56417592	0	0	0	1	1	0	no	n/a	n/a	no	no	no	intron_variant	HDAC8
RRM2L2	10:61064595-61064611	1	1	1	1	1	1	no	n/a	n/a	no	no	no	intron_variant	PUS10
HNRNPA3L1	12:59663316-59663332	1	0	0	1	1	1	no	n/a	n/a	no	no	no	intron_variant	GRIK2
LOC478720L2	11:26893461-26893479	1	1	0	1	1	0	no	chr35:10455821	no	no	no	n/a	intron_variant	MLANA
BLOC1S5L1	23:27162327-27162346	1	1	1	1	1	0	no	chr35:7977046	no	no	no	no	intron_variant	EAF1
DDX18L5	21:42853777-42853796	1	1	1	1	1	1	no	chr19:32015868	no	no	no	no	intron_variant	NELL1
PACC1L1	27:21729980-21729998	0	1	0	0	1	0	no	chr7:10568816	no	no	no	no	intron_variant	LOC111092834
ENO1L1	6:44720874-44720896	0	1	0	1	1	0	no	n/a	n/a	n/a	no	n/a	upstream_gene_variant	LOC111096360
ABHD12L1	11:64791859-64791877	0	0	1	0	0	0	no	n/a	n/a	n/a	no	n/a	upstream_gene_variant	-
HNRNPA3L4	28:8197292-8197307	1	1	1	1	1	1	no	n/a	n/a	n/a	no	n/a	upstream_gene_variant	-
ZRANB2L1	31:32211956-32211970	0	1	0	1	0	0	no	n/a	n/a	n/a	no	no	upstream_gene_variant	TTC3
RAD17L1	33:22925933-22925950	0	0	1	1	0	0	no	n/a	n/a	n/a	no	no	upstream_gene_variant	B4GALT4
STIP1L1	1:116562228-116562245	0	0	1	0	0	0	no	n/a	n/a	n/a	no	no	upstream_gene_variant	CAPNS1
MRPL45L1	36:30106582-30106598	1	0	0	1	0	1	no	chr9:23829910	no	n/a	no	n/a	upstream_gene_variant	GULP1
HNRNPA3L6	30:23930947-23930968	1	1	1	1	1	1	no	n/a	n/a	n/a	no	n/a	upstream_gene_variant	RNF111
