# Supplementary material for: Recent, full-length gene retrocopies are common in canids
Source: HighWire-hosted journal article supplement (doi:10.1101/gr.276828.122), 2022-08-01
Supplement: Supplemental_Table_S14.xlsx [file Supplemental_Table_S14.xlsx]

## Sheet: S12
Supplemental Table S14: Comparison of retroCNV identified in 78 human genomes to previous studies. "Parent gene only" indicates that the study identified the gene as a retroCNV parent gene for which no insertion site was resolved.
Parent_gene	Parent_location	RetroCNV_name	retroCNV_location	Total_individuals	Populations	Zhang et al (2017)	Feng and Li (2021)	Ewing et al (2013)	Abyzov et al (2013)	Schrider et al (2013)
TDG	chr12:103965842-103988874	TDGL1	chr12:125316599-125316618	74	ACB,ASW,BEB,CDX,CEU,CHB,CHS,CLM,ESN,FIN,GBR,GIH,GWD,IBS,ITU,JPT,KHV,LWK,MSL,MXL,PEL,PJL,PUR,STU,TSI,YRI	present	present	present	present
CBX3	chr7:26201443-26213607	CBX3L1	chr15:40561979-40561995	67	ACB,ASW,BEB,CDX,CEU,CHB,CHS,CLM,ESN,FIN,GBR,GIH,GWD,IBS,ITU,JPT,KHV,LWK,MSL,MXL,PEL,PJL,PUR,STU,TSI,YRI	present	present	present	present	present
MOSMO	NW_017852933:1020384-22084654	MOSMOL1	chr4:7947925-7947942	27	ACB,ASW,CEU,CHB,CHS,CLM,ESN,FIN,GBR,ITU,JPT,KHV,LWK,MSL,MXL,PEL,PJL,STU,YRI	present	present
TYRO3	chr15:41559212-41583589	TYRO3L1	chr13:43495689-43495702	22	ACB,ASW,CEU,CLM,FIN,GBR,GIH,IBS,JPT,MSL,MXL,PUR,STU,TSI	present	present	present	present	present
MFF	chr2:227325233-227357836	MFFL1	chr15:93296471-93296485	21	ACB,ASW,BEB,CEU,GIH,GWD,IBS,KHV,LWK,MSL,PUR,STU,YRI	present	present	present	present	present
SKA3	chr13:21153595-21176565	SKA3L1	chr11:108715019-108715038	18	ACB,BEB,CDX,CEU,CHS,CLM,FIN,GIH,IBS,ITU,KHV,MXL,PUR,STU,TSI	present	present	present	present	present
GAPDH	chr12:6534517-6538371	GAPDHL1	chr5:57190153-57190170	6	ACB,BEB,CHS,JPT,PEL	present	present	present	Parent gene only	present
HNRNPC	chr14:21209147-21269442	HNRNPCL1	chr6:113696320-113696335	6	ASW,CLM,FIN,IBS,LWK	present	present			present
PRKRA	chr2:178431414-178451175	PRKRAL1	chr2:70296471-70296479	5	CHB,FIN,KHV,PEL,PJL	present			Parent gene only
PRKRA	chr2:178431414-178451175	PRKRAL2	chr17:63609973-63609967	5	CHB,FIN,KHV,PEL,PJL	present			Parent gene only
PDCL3	chr2:100562993-100577472	PDCL3L1	chr2:179065484-179065497	5	FIN,IBS,JPT,PEL,STU	present	present		Parent gene only
FBXL5	chr4:15604381-15681544	FBXL5L1	chr13:40046120-40046135	4	ACB,MSL,YRI	present		present	Parent gene only	present
PRELID3B	chr20:59033145-59042786	PRELID3BL1	chr3:8827389-8827405	4	ASW,GWD,MSL	present
MATR3	chr5:139274101-139331677	MATR3L1	chr12:113449201-113449216	3	CEU,IBS,PJL	present		present	Parent gene only	present
MTMR2	chr11:95832880-95924110	MTMR2L1	chr13:46720559-46720577	2	CEU,TSI	present		present	Parent gene only
TMEM126B	chr11:85628573-85636540	TMEM126BL1	chrX:122016930-122016939	1	GWD	present		present	Parent gene only	present
GNA11	chr19:3094362-3123999	GNA11L1	chr1:209317838-209317852	1	BEB	present			Parent gene only	Parent gene only
GNPTAB	chr12:101745499-101830831	GNPTABL1	chr1:60018509-60018524	1	ESN	present			Parent gene only	Parent gene only
KRR1	chr12:75490863-75511609	KRR1L1	chr10:22910508-22910521	1	CHS	present			Parent gene only	present
RPL37A	chr2:216498844-216504086	RPL37AL1	chr7:128386613-128386626	1	CHS	present		present
RBMX	chrX:136869192-136880725	RBMXL1	chr13:22768171-22768182	1	MSL	present			present
TCP1	chr6:159778498-159789602	TCP1L1	chr1:43357499-43357509	1	LWK	present			Parent gene only
PPP1R21	chr2:48440766-48515386	PPP1R21L1	chr21:16806444-16806454	1	YRI	present
SARAF	chr8:30063003-30083208	SARAFL1	chr1:191829583-191829594	1	GIH	present
STX12	chr1:27773219-27824443	STX12L1	chr14:34572383-34572398	1	GWD	present
ZNF664	chr12:123973215-124015427	ZNF664L1	chr2:3884044-3884061	10	BEB,GBR,GIH,IBS,PJL,STU,TSI,YRI		present	present	Parent gene only	present
UQCR10	chr22:29767369-29770413	UQCR10L1	chr1:109108012-109108025	7	ASW,CEU,CLM,GBR,MSL,YRI		present	present		present
RPL22	chr1:6185020-6199595	RPL22L1	chr1:94957481-94957493	7	ASW,CLM,MSL,MXL,PUR,TSI		present	present
PPIA	chr7:44795960-44803117	PPIAL1	chr4:76427230-76427246	6	CEU,FIN,GWD,IBS,MXL,TSI		present	present
MT1H	chr16:56669814-56671129	MT1HL1	chr7:7904337-7904349	3	GWD,MSL,YRI		present		Parent gene only
HSPE1	chr2:197500379-197503449	HSPE1L1	chr7:137300977-137300993	2	IBS,PJL		present	present
RPLP0	chr12:120196699-120201111	RPLP0L1	chr11:60274155-60274166	1	YRI		present	present
TPI1	chr12:6866834-6870948	TPI1L1	chr8:67465341-67465350	1	TSI			present
RPL36	chr19:5690295-5691875	RPL36L1	chr1:25724513-25724526	1	MXL	Parent gene only		present	Parent gene only
GNA11	chr19:3094362-3123999	GNA11L2	chr20:32693046-32693196	1	YRI	Parent gene only			Parent gene only	Parent gene only
SPTLC1	chr9:92031141-92115413	SPTLC1L1	chr15:44453797-44453811	1	MSL	Parent gene only			Parent gene only	Parent gene only
RPS29	chr14:49570988-49598710	RPS29L1	chr1:23027135-23027152	1	BEB	Parent gene only			Parent gene only
FRG1BP	chr20:30377164-30419843	FRG1BPL1	chr2:75040497-75040550	1	YRI	Parent gene only
HSPA14	chr10:14838306-14871741	HSPA14L1	chr11:39871994-39872006	1	ESN	Parent gene only
RABL2B	chr22:50767500-50783705	RABL2BL1	chr8:103097982-103097996	1	PEL	Parent gene only
RRAS2	chr11:14277920-14364506	RRAS2L1	chr20:50103741-50103756	1	MXL	Parent gene only
SFT2D2	chr1:168226004-168253021	SFT2D2L1	chr9:27755299-27755314	1	ESN	Parent gene only
DDT	chr22_KI270879v1_alt:207734-23979828	DDTL1	chr17:58905024-58905040	2	ESN,PEL
RPL12	chr9:127447674-127451406	RPL12L1	chr7:140621426-140621439	1	CLM
TMEM251	chr14_KI270847v1_alt:299536-93188463	TMEM251L1	chr3:170011945-170011958	1	CHB
TOMM6	chr6:41787694-41789895	TOMM6L1	chr2:25707273-25707288	1	MXL
