# Supplementary material for: Recent, full-length gene retrocopies are common in canids
Source: HighWire-hosted journal article supplement (doi:10.1101/gr.276828.122), 2022-08-01
Supplement: Supplemental_Table_S15.xlsx [file Supplemental_Table_S15.xlsx]

## Sheet: S14
Supplemental Table S15: List of 5' and 3' junction sequences for the retroCNV insertions resolved using TEBreak.
Parent_gene	Parent_gene_location	RetroCNV_name	RetroCNV_location	5_prime_junction	3_prime_junction
AAGAB	30:31369534-31422363	AAGABL1	16:20795596-20795614	CTCTCATGAATAAATAAATACAATCTTAAAAAAAAAAAAAACAACTCCAGATTTACCTTAGGAAATGTACAAAATGCTCTAAATGGCAGAGTTTTTAAGAAAATGAGCATACCGCGCGCCGCGCTGGCTGCGGGCGTCCCCTGTGCGCTCGTCGCCA	CCCCCTCGGGCCCCCCGTGGGAGCCCGCTTCCCCCCCTTCCTGGGTTTCCTCCCTCTTCCCCCCATAATAAAAAAAAAACATTTTAAAAAAAAAAAAAACAACTCCAGATTTACCTTAGGAAATGTACAAAATGCTCTAAATGGCAGAGTTTTTAAGAAAATGAGCATACCACTTTACCAACAGAAAGACCTAAGAA
AASDHPPT	5:26172888-26193639	AASDHPPTL1	25:27079415-27079432	CAAATTCAAGCCTTTGCAATTCAAAGCCTAGTCCAACACCAATGGCTTTTATGAAGCTTTCTTTCAGTGCCCAATTCCTGTAAAACATATCCAGTTGAGTCCATTCATCCTTAAAGCTTCTGATTGTTTCCCATTCTTTATTGGTAAACTTTCTTTTCATAATATGGAAGAATTCTGGAATTGAACCACGACCTGGAAAACTAGTCTTCATTACATCAATTCCAACTTGTAGCTCAGGCTCCGCAGCAAGCACAGCATAGTCCCCTTGATGAGAGACGTTAAAGTTGAAATTGGGGTAGGGATTCAAGGAGTCTTTTGCAAGAACTGGTTTTCCCTTTGCAGTTCTTTGCAAACGAATATTATTCCAAGGGATATTCAATTTCTCTGCAACTAATTTCC…	TTGGTACAACATTACTTTCAAGTCCTTGTATTTATGTAACTGAAAACATCCCCAACATCTTATCTTAAAAATTATCAGTGTTGTTTTTTGTCCCCAACAATCCATTATGAAACTTTTCTTTTTTTTTTTTTTTTTTTTTTTTTTAAATTAAAATTTTTTTTTTTTTTACAACATAA
ABCD3	6:54740704-54816854	ABCD3L1	7:54660394-54660410	GGCTCCGTGAAATTGCATTTAAGGCCTACCCAAAAAAATCAAGGATATAATCCCCTCATCTCAAAATCCCTATTTTGGTCACTACTGCAGAGACCTTTTCCCCAAATAAGGTAACATTTACAGGTTCCAAGAATAAGGAGCTAATATCTTCTGGCCCATTTTTTGGTCTACCACAGCAGCTGAAATTGAGAACCTCCATATTAGCTAAATAAAGAACTATGTCAAAAGAAAAGCTTTTGGGCGCGCGCCGGGGGGCGGGGCTGCGCGGCCGGCCCCGCCCACCGGCCGCGCGCGCCTCTCCTCCCAGTCTCCCCCGCGCTTCCTGCGCTGAGGGCAGTCGTAGCCGCCGCGGCCCCGTTCCCGGCTC	TTAGAGTGCACTTATCATGATGAGCACTGGGTAATGTATACAATTGCTGAATCACTACATTGTACACTTGAAACTAATTTAACACTGTATGTTAATTAGACATCAATAAAAAACAAACCAAAAAACTCAAACTCCTCTCAAATGCTTGTTTTTCCAAAAAAGCTTTTCTTTTTTTTTTTTTGGGATTTCTAACTGTCACTTTATTTTTGTGTTTTTCAAGATTAAGACTGTATGAACTATGTATAAACTACCCACTTTTTAGATACCAGAATAAAAAGAGCAAGCAAAGGTTGTACAGGATTTCT
ABCF2	16:15253110-15267221	ABCF2L1	27:6320625-6320641	NA	NA
ABCG2	32:11443778-11517674	ABCG2L1	19:4477904-4477915	NA	NA
ABHD12	23:1496183-1562682	ABHD12L1	11:64791859-64791877	AAGGCAGGGCAAGTCACTACACCTCTCTGTGCCTGTGTCCACATTTGGAAAATGAGGATGTCCATAAAATACTTCCTACACGGAAAATGCTTAATGACAATAAATGTTGCTGTTATCATAATACAGTTCCCTATTAACAGTGAGAACATCCGTTTTTCCTATGAGAGAGTGCTAAAAAAGACATTCTCAACTACCAAATCCGTCAGAGCTTAATACTCTCTCACGTAGAATAATACCCTTGCTTCTCAGGAAGCTTTGGCCTACCATTTGAATCTGGTAATAAAAGCTGTGGGAGGTCCAAGTCCCTGCTCCCCTGTGTTGGATATACTTGGACCCAAGCTCGAGCTTGTCAATAAACCCTCATGTGTTTGCATCGGTGTCGGCTCCTTGGTGGTTTCT…	ATCCCAGCGAAAGACTACTTGCGTCCCTGAAAGGGTTTTTTATTAAGGAATTCAAATGCACAGAGTATCAACCTGTGTTTAGTGAATCCCCTTCTCCCACAGCTTTTATTTTTTTTTTTTTTTTTTTTTTTTTTTTTTCACCACCACAATTTTATTCTTATCTAACAAAAATCCGCCC
ABHD17A	20:57083381-57092021	ABHD17AL1	23:6064812-6064815	TGATAGTCACACAGAGAGAGAGAGAGAGAGGGGCAGTTTTTGTTTTCAATAATGACCAAGCACTGACCAAGCATTTGGGAATTCTGATTTAATACAAAATTAAGGATTAATGTATCTTTGTTTATATCTGGTCAAGATTGCATCCTGATTTATGCTGAGACTCTTCTGCATCAGATGCTGCCTGGCAGGCGCTGCGTACCAGGTACGGCATCAGCCCGGACAGCATCGTCCTGTATGGGCAGAGCATCGGC	AGGGAAAAAGTTAAAAAGAATTAAAGATTTTAAAATTTTTTAAAAAAAAAAAAAAAAAAAAAGAACTGCAATAATGAAAGTGGAGCTAAGTGTCTTCAATCATGAGAATCCACTGATCTGGAACCACACAATGTTCAGCCACTCTCTGTTTATCTCATT
ABHD18	19:12935971-12982227	ABHD18L1	33:4390136-4390151	NA	NA
ABITRAM	11:64094653-64100078	ABITRAML1	12:8208147-8208154	ATTCTTCTCCATCTGAACAGTAAATCTTACACAGAGGTGCAAGCTCTGTTAGAAACTGTGCCCCCCGCTTAAATTTTTTAAAGGGAACCACCGTGTGACAGTGAGTCTGATCTCGGCCTGGCTGCATTGAAGCCACAGAACCGGACAGCCTGTCGGCGAGGG	AAAAAAAAAAAAAAAAAAAAAAATAAAACAGCGACATCCGTCATTACCACGTCACCATCATTATTTCCAAATATTCATGGGGCGCTTATTATGTGCCAGGCACTGTTTGCTGTAAGCTCTTTGCTTGTCCTCAGTCATCCATCTCTCCCATCAACTCCGAGAAAAGGG
ABRACL	1:31254959-31267167	ABRACLL1	31:13882751-13882765	NA	NA
ACBD5	2:6873207-6922110	ACBD5L1	25:42401888-42401934	NA	NA
ACOT13	35:22707214-22723345	ACOT13L1	25:15141998-15142011	CACGGAGACAGATATTAGAATAGGAATTGCCTGAGGCTGGGACTGAAATGAGAAGTGGCTACAAATGACCAGGAGGGATCTTTTTTTTGGCATGATAGAAATGTTCTAGTATATGTGCTGCCGAAGCGAGCACGATAGAAATGTTCTAAAATTAGATTCTAAAACATTTAGAGGTCACAGCGGGGGCGGGGCTGGCGCGTAAGAGCGCGCGGGCGGCTGCGGGGAAGGCGGCGCCGGTTCCACCCGCCTGTCCTTGCTCCCGAAG	CAAAGGCAGACACTCAACTGCTGAGCCACCCAGGTGTCCCTGACTCATCAGTTTTTTTAATCAGTTCTTTTTTTAAACACAGTTTTATTGATGTATCGTGTACTTATAAAATTCACTTATTTTAAGTATACAATATGATGAATTTTGGTAAATTTTCGAACATTTCTAAATGTTTTATTTATTTTTATTTTTTATTTTTTAACTGTTAATGTCTCCAAATTTATTTTTTTTAAGATTTATTTATTCATGATAGAGAGGCAGAGACACAGGAGGAGGGAGAAGCAGTCTCCATGCCTG
ACSL1	16:45735675-45806235	ACSL1L1	18:41406405-41406417	CCGCCGTAGCCGCTACGCCCTGGCTGCGCCCCAGCCTCCAACGCCCACAGCATGTTTTTTTTGATTTGTTCTTCAACCTTTTCCTAACCTTGCATACAGAGGCTGCCTTCTTACACTTTTCTATCTCTTCTAGGTGTGAAATACATGCTGTGCTTAGAGTAGATTGGCTTAGTTTTTTGGGCAAGTGATGCAAAGTGGCATTTCCTTTTATTTTTCTTTACTCTTTTTTTCAT	ATAAATATTTCTGCATTTCAAGTGAAAAAAAAAAAAAAACAAACAAACATGCTGTGAGTAAATATGCCAGAACCTGGATTCTGAATTTGACACAGATTTCCTAATTTAATTCTCACAATAACACTTTAGATATGCATTATATTTATTTTTATTTTAAAGACAGACACCAGAGGTCAATAGAACTTCTGTCACTTAGGGGCACCTGGGTGGCTTAGTGC
ACTB	6:12421006-12424449	ACTBL1	2:39229620-39229638	AAGCAACCAGGACTCCTGGGGCAAATGGTTTATCATCAGGCCTGGTCAGGTAAATACATGGTAATCTTAAAAACATCTCTTAATGTATAAAAGTAAAGAAACACTCAAAAACCAAAAGGATGAGACCGCCGAGACCGCGTCCACCCCGCGAGCACAGGCCCCTCGCCC	TGTTGCTCAATTGTTCCACCTCTGGCCATTGGCAGTTTTTTTCAGAATGACTCTTATGTCCCTTCGCCAAGCCCTCATCCTTTTGATTTTTTTTTTTTTTTTTTTTTTTTTTTTTTTTTTTTGGGTGTCTTTT
ACTB	6:12421006-12424449	ACTBL2	5:73527066-73527110	AGCGCATGCAGGGCGCCTGCTGCGGGGGGGCCGTGTGGGGTCCTTCCAGGGACCAGCCCCAAACGTGGACAGACGCACTCTCGCCACTGCTGCCGCCCCTGGTTGGTTCTGGGAGAGCCTTACACCCTTTCTTGACAAAACCTAACTTGCGCAGAAACC	AAAAAAAAAAAAAAAAAAAAAAAAAAAAAATAAAGCCGAGGTTGGTCCGGGGCGGGGGTCCTCCGGCGGCCTGCGTGCCTGGGATGCACTCCCCCCAGAACGCCCTCCAGGGCCACCTAATGCTGGAGACATTTATGGCGGTAGTTGCCGTTGCACTGGGCGCTGGCCGGGTGCCAGCCACGGTATATGCCATCAGTGTCACTCCCGGCTCACAAATATCTT
ACTB	6:12421006-12424449	ACTBL3	8:28786548-28786564	GAGGGGCCTGTGCTCGCGGGGTGGACGCGGTCTCGGCCTATTTAAAATTTTTAAAAATTGAAATTCTTACCTATGCTGGTATGTATGTCTTTACCTTCTAGAATTATGATATATTTATACTAACTTTCCCCAACTATCTTCTTTTAAACTTAGGTAGTATAGATCATCAGTAGAAAAACTTCCTGAAAGAAGAAATTGTTCAAGAG	AAAAACAAGGGCCGTGATGGCAGACCATTCAAAATAAAACAAAAAAAAATTTTAAATAGAACCCCTATCTTTCAAACAAAAGATCACAATCACAAAACAGAAAACAAAAAAAATAGCTAAAAATTACTCATAAGGAGAGGG
ACTB	6:12421006-12424449	ACTBL4	12:20828913-20828923	NA	NA
ACTG1	9:635978-638328	ACTG1L1	1:115217252-115217265	CGGAGGACGAGCGGCGGGAGGACGCGGAACGCAGGCCGGCTGCGGCGAGTGAGCTAAATATATTTTTAATGTTTCTAATTAATGTATCAATTTATGGACCTTTTATGTTAAAAAAAATCTATGACTGTAGATTTGTTCATTTTTCCTTGTAATTCCCT	TTCTAATTTAATTACCTTGTAGTCCAGTAAATGGACTGTAGGATATTTAATCTTTGAAGTATGGGAAATTTCAGGGAAATATTCTGTTTCTGCTTGTAAAGAAGCTTAAAAAAGTATTTTTGCAGAGAAGGCTTCAAAATACAGCTTATAAATCAAGATAGTTGTGTTGTTAAATTTAAATATATTTTTTTTTTTTTTTTTTACTGCAGCACTTTATTTTCCTCACACAATGACGCGTTGCTGGGGCCTAATGTTCTCACATGACAGTAGAAAACCGAAATTTGTTGTCATCTCTTAAAAGAATTGAGAATTGTGTACAAAAAACCTTACATAAATTAAAAGGATGAATAAATTTACAGTTGTAAATGCAAACAGTTTTCCAACTCAAGGCAATTAACC
ACTG1	9:635978-638328	ACTG1L2	13:59838264-59838280	GCTTCAATTTTTCCAGAAAATCTATTCAACCTTCTAGTTTTAATTTTATCCCTCCCAAGAAATTTCTGAAGCTATCATAAATTCATAGTTGAAGTTCAAGAAACTGCATTTATCCTATCTTTGTCAAAGATCACTTCTTTAAAAGAAATTAAGAAATCACCTAGCCTCACTCGCCGCAGCCGGCCCGCGCTCCGTGTCCTCCCGCCGCTCGTCGTCCGCGTCCGCGACCACCGCCTCCGCCGATCGCCATGGAAGAGGAGATCGCCGCGCTCGTCATCGA	GCAACGCGTAAATGTGTGAGGAAAAAAAAAGGGTTGATAAACGTAAAAAAAAAAAAAAAAAAAAAAAGAAATCACCTAGCTAAGCCATCCTCAGAGAACAGGAAATATAGATAATTCTATGCTCAAACTACACCCTTAGAGGCTCTAGATTCTTACACTTTTTTTTTGTCTATCCTGTGCATGTCCTGAAGTTCTATGTACTATAAGTCAATAAATATTTTGATGGTGATAAGGAAAATTA
ACTR2	10:64696068-64733027	ACTR2L1	13:15409290-15409307	CTGGCTGTCCATCGTCCTCCCGGAAGAGAGCCGCCGCCGCCGAACGCTAACAACTTCTTTCTTGATAGGTCTCCTGAGGCAAGGGAAACAAAAACAAAAATAAAATGTTGGGACTTCATCAAGATAAAAAGCTTCTACACAGTGAAGGAAACAATTGACGAAACTGAAAGGCAACCTTTGGAATGGGA	ACCTGAATATGAGACTCAAAACCATAAAAATTCTAGAGGAGAACATAGGCAGTAATCTCTTTGACATTGGCAATAACAACTTCTTTCTTTTTTTTTTTTTTTTTTTTTTTTTTACTTTCAAAAATTTGATTTTTTTTTTTGAATCAAAAAAAAGGGTATTCACGTTA
ACTR2	10:64696068-64733027	ACTR2L2	15:16394253-16394270	NA	NA
ACTR3	19:35097968-35133330	ACTR3L1	3:4673677-4673692	NA	NA
ADAD1	19:17728106-17826412	ADAD1L1	8:46883481-46883496	TAGGCTAAATGCTATTTATTGAAAAGACCAGAGAAGAGAGAGTACAGACTCCCTGAATTTTGGTTTTTAGCAACACAAAGGAAAAGACCAAGAGATTGCACATCATAAAATGTGAAGATATGATAAAAGAAAATGAAAAGATAAAGTTACAGAACAGGAGAAAATAGAACACATAATGGACAGGTAATAAATAAAGGCCTTCTACAAGTCAGTAAGAAATCTGGCCAAAAGATATCAAAAAGCAGCTCTCAGAAGGTAAAATACAGAGGTACACAGGCGCCACAGCAGAGACGGTGAGAAAATGTCTGGCAACAACGACTGGTTTCAGAGTTCCCGGGTCCCTAGCTTCGCTCAGATGCTGAAGAAGAACTTGCCAGTTCAGCCCTCAGCCCAGACGGT…	ATAGATATCTTGTATTATATTTATTTAATAGACTATAAGATTTAAAAATTTTTATTTTTTTGTTGTTTGTTTATAAACATAAAAAAAAAAAAAGAAAAAAAAAGAAGGTAAAATACAAATCAACAATAAATAGAGGAAATAATACTAGCTCAACCTGATGGACTAAATCCATAATTTGTCTTCTCCCAAATCCCTTCACAGGAAAGAAAAGACCTTTTTTAAAAAAAAAAAAGATTTTTATTT
ADA	24:32083786-32119810	ADAL1	24:35306452-35306469	GGCGGGCATGTAGTAGTTAAACTTGGCCAGGAAGCTGGAGAGGCTGAGCGGCTTGTCCATGCAGATGATGTCCTGCAGCTCCTCTACAGTCTCAGCAGGGAGGGCAATCCCCCTCTTCCGGCTGAAGTATAAGATGGTTTCAGGCTTGATGGCCCCATCGAGGTGGACATGCAGCTCCACTTTGGGCTTGTCGAAGGCGGGCGTCTGGGTCATGGTGCCAAGCGTGCGCCCCTGCGCGGCTCCCTCCGCCGGTCGGTGCTCACCCCAGGACCTGCCTGAATCAGTATAGTTTAATGATAATTTGTTACTCAGCAGCAGATAACTAATACACTGGGTCCTCAAGAAGTCATCACTGAATAACCAAAGGGAGGGAAGAATTAAGCAGGAAACGCTGTCGGA…	AAAAAAAAAAAAAAAAAAAAAAAAAAAATAAACTATACTGATTCATTATTTCATAGTGTCTGTGTGCTGGAATCTGGACACAGCTTTTCTGCATCCTCTGCTCAAGGACTTTTGTGAGCTACGATCAAGGGGTCAGCCGGGAAGAAGTCTCACTAGCAGGCTCAATGGGGGAATGATCCACTCCCAAGCTCACTCACATGGTCGTTGGCACAATTCGGTTCCCTTGGGCTATTTTGCTGAGGCCCTCAGTTCCTTGCCACATAGGTCGTTGGCACCATCACCCACCAGAAA
ADH4	32:21282526-21299387	ADH4L1	25:15591791-15591806	GCCTTGGAGGTTTCTTTCTGATTTGAGCGTGCTCCACTCCATTATTTTTCATAATTTTATCTTCTATATCACTTATTCATTCCTCTGCTTCTTCCCTCCTTGTGGTCATTACGTCCAGATTGTTTGGAATCTCAGTTATTGTATGTTTCATTTCTGACTATTGGTTTTTAACTCTTTTATCTCTATGGTAAGGGCCTCCCTGAAGTTTCCCATTCTTTTCTCAAG	AAAAAAAAAAAAAAAAAAAAAAAAAAAAAAGAAAAATAATGGAGCTGAACAAAAGAGAGAAAGACAAATTATGGAACACAAGAACAGACAAATTATGGAACACAAGAACAGACTCAGTGATTCCATCAAGCATACTAACATTCATATCATAGGAGTTCCAGAAAAACAAGAGGGAGAAAAAGGGGCAGAAAATTTATTT
ADK	4:24540626-25046469	ADKL1	1:47668298-47668317	CTTCTCCCTCTGCCTGTGTCTCTGCCTCTCTCTCTTTCTGGCTCATAAATAAATAAAATAAAAAAAAGGGTACACTTACAGTGAGGAGCAATAGGTAATGCATGGAATTGCTGAATCTTTATATCACACACCTGAAACTAACATTACATTCTATGTCGATCATACTAGAAAAATTTTAAAAATAAAAAAAATTCTAGGGGTGGGCGCGCGAAGATGGCTGCGGCCGACGAGGAGCCGAAGCCCA	TTTTCTGTCTTTGCCCTGTGCTCAATAAACTAAAGAAATAAGATTAAAAAAAAAAATTCTAAAAAAAAAAAAACAAAAAAACACTTTGTATGAATCATACCTAGGGCGAGCGCAGAACCAATAATACGGAAACCAAAGTGGG
ADSS	7:35440250-35477470	ADSSL1	23:21009198-21009215	NA	NA
AIDA	38:16938279-16971200	AIDAL1	1:104471368-104471385	NA	NA
AIFM2	4:21086778-21096789	AIFM2L1	4:7777896-7777909	NA	NA
AK6	2:54390411-54406872	AK6L1	7:67041683-67041696	GCAGTATTTCAAGATACCTGTGGGCTAATCATGACATTAAAAATGGTTTCAATTGAAACAATTGAAAAAGTATTTAATTGCTTAATGTGAAATTTAAGACTTGAAAAACGTTTGTGGACTTAAGAAAAGTTATTAAGGAGCGCGCCGAGGACCATGTTGCTCCCGAACATCCTGCTCACCGGTACCCCGGGGGTTGGAAAAACCACACT	TCCTTTTGAGATGTTTGGTTTTTTTTAAAAGGATTAGTAATGTTTATTTATTAGCCTTTAAGTTTAAAAAAAAAAATTGTTTTTCAACAAAAAAAAAAAAAAAAAAAAAAAGAAAAGTTATTAAGGGTTAGTTTGCCTCTGGTAGTCCTAGTATAATTTTTAATAGCACTTTCATTCTCAAGAATCTCCTTGCTTTGGACAATAAATTATATAATTCTAATTATGTAGACCTATTTCACAAGTTATTCTTCATTCCTGTC
AK6	2:54390411-54406872	AK6L2	11:43945179-43945195	GCAAGTTCTTTGCCTAGTGTGGTTTTTCCAACCCCCGGGGTACCGGTGAGCAGGATGTTCGGGAGCAACATCTACCTTGGGAATTTTTAATCTGATTCTACCTACTGTAAACTACCTCTGAAATACTACACAATTAATTTAAATTCTCCAATTTTTGTATCCTCACCTGTAAAGGTGATGTGTGTTGTACCAGTGATAGTGCTGCTAATTTCTTTATATCACTTCCAATATTTGTTTCAGTTGACATTTTCTTTAACTTGTAATAAAAATGGCATACTATGAAAATCACGTACAATTATCT	AATAAGAAAAGACAACATAAGCACTAAGTTGGGTGTCTATCTATCTGTCTATCTCCCTCCCTACGTACCTATCTCCCTAAGATCTATAGTCATATTACCTTGGGAATTTTTTTTTTTTTTTTTTTTTTTTTTTTTTTTTTTTTTTTTTTTTTTTTTTTTATAAAACCTTT
AK6	2:54390411-54406872	AK6L3	18:24116926-24116940	TACCAAGAGTGGGAGTACTTGGTCGGCTAGTAACAGAACCAACACTTAACCGTGGAACTGTTATTCTTCCCGCAGAAGTTGATGCCTTTTTTTGTAAAGACTTAAGTCTATAGTTTGGAGCCGTCAAGCAATATCTATCAGGTGGCAGCCTGGGGCCTGAATATGGCTTGATTAACGGCAAAGGAGTTTGATTTCTTTGCCTTGCAATATCCAATAAAAAATCTCTTGGGGGAGGAGAGGTAAAAGACTGATCAGCACGACACTGAATGGCAAGCCGCACATCGTCTGCATCAACAGTAGCCTTCTTAGCATGGCTTGAATAAATTTTTGCATCATCTAGGATTGTGGTCACATATCGGAACGCAAACTCCAACATCTGATTTATAACTCTTGGTTCAT…	AAAGTTGTCTTTTTTTTCACCCATTATACATTGTTACTCAACAGGTAGAAATATGAAGCAGTAAAACAGTATACATCTCCATTTGAACTAGGCACATTTCC
AK6	2:54390411-54406872	AK6L4	27:27542961-27542980	NA	NA
AK6	2:54390411-54406872	AK6L5	28:22867147-22867162	CAATCCTGATCTCGATGCAAGTTCTTTGCCTAGTGTGGTTTTTCCAACCCCCGGGGTACCGGTGAGCAGGATGTTCCTGTTATATGTCTTTTTAAACTAGTATCACCACATAGTCTCTCCTTGTGGTTACTGTCTAGTGAAAGTTCATAGTCCATTGAAATATTTGAAAAAATCAAGATTAGCTGGGTGAATGTTGCTGCTCTGATAAAAGTCATTTT	ATTTATATTCATAATAAATCATATGCCATATTTTGGCTTCAGTAATCATTAAGGTATGTGATGGGTGATTATTTTTGTTTCAGAAATGAATAAACTGTTTCCCTCAATTATGTTCTGAGTTTGTTATATGTCTTTTTATTTTTTTTTTTTTTTTTTTTTTTTTTTTTTTTTTTT
AK6	2:54390411-54406872	AK6L6	30:6907209-6907225	NA	NA
AK6	2:54390411-54406872	AK6L7	36:19200959-19201020	CCAACCCCCGGGGTACCGGTGAGCAGGATGTTCGGGAGCAACATTGCACTGGTGTTTAGCATTCAGTAACATAATGTAGATTCTAGAAACAAAACTAGCCCCAGGATCTGTTCAAGTAAGCTGGAATAAAGGAGTGTATCTTTTAAAGTTGTCTTTTTTTTCACCCATTATACATTGT	AATAAATTGAAAAACATGGTTTTCATCAGTATAGCACAGTCAAATCTATTTCTTGCTTTTCTTCTTTCCTGTTCATTTCATCATTAAAGACTCAACAAAAGAAATTTTTATTAATTTAAGAGAATGTTTGCACTGGTGTTTTTTGTTTTTTTTTTTGATGAACAACAATTTTATTTTTCACACT
ALDH18A1	28:9101578-9148063	ALDH18A1L1	8:21084358-21084375	ATACAATGACTTGTACATGAATGTTCATTGTAGCATTATTCATACAATAATAGGAAAATAATCCATATATCAATTAACTAGTAAATAGATAAAATATTTTTATTCATATAAATTTTTCAGCAATAGAAATGAATGAGTTACTAACATATGCAACAACAAGGACAAACCTTAAAAGCATGCTAAGTGACCCGGCGTCGGGCCCGGGCGGGCGGGGGGCGCCGCCACGTGGAGCGCAGCCCGGATTCTCCACGGCGCCTACGCTGTTGCCGCAGCGTGGCTCCGGCTCGGCCCTTCGCCCCACGTCAGCGGCGGAGGCCCCGCGGCCTGCGTTGACTCCGGCGCCGCTGACGTAACGTCATCTTGCGGGACGTGGACGGAAGAAAAAGGGGAGTAAGCCGG…	AAAAAAAAAAAAAAAAAAAAAAAAAAAAAAAAAAAAAGCATGCTAAGTGAAAGAAGTTGGATAAAAAAAAGGACTACATTATTAGAAATTTCCACTAATATAAATGGGGGGAAGTAAAACTTT
ALDH7A1	11:15828581-15878556	ALDH7A1L1	28:16283962-16283977	NA	NA
ALDOA	6:18077241-18083053	ALDOAL1	22:5795541-5795557	TCTGTCAGACACTATGTTACCTACTGATCTACACTTCTTTTAAAGCCCACTAGCAAAAACTACAGAACTCTCCAGTGAAAGCAAACAAAGGCAAGACTATCAGAGAAGTGGGACACCTGGGTAGCTCAGCGGTTGAATGTGTCTGCCTTCGGCTCAGGGAGTGATCCTGGGATCTGGGATCGAGTCCCACATCGGGCTCCTTGCATGGAGCCTGCTTCTCCCTCTGCCTGTGTCTCTGTCTCTCTCTCATTGTCTCTCAAGAATAAATAAATTAGGCAGAACCGGGGTCCTGGTGACGACGGCCGCGTTCGCTCCCTCAGCCCGCTCGCCCGCCCGCCGCCCTCCACCGCCGCGCCCCGCAAGCCCGCCCCCTCCCGTGCCAGGAACTGACCGGCAACA…	AAAAAAAAAAAAAAAAAAAAAAAAAAAAAAAAAAAAAAAAAAAAAAAAAAAAAAAAAAAAAAAAAAGAATAAATAAATTAAAAAAAAAAAAAAGACTATCATAGAAGAAACCTGACACAAGCAAAAAGTTTTCTGGTATTTGCTTTCTGAAGTTTTACTGAGGTATAACTGATATAAAGGAAGCTGATCTTGTATCCTGTCTGCAAT
ALDOA	6:18077241-18083053	ALDOAL2	27:16807428-16807450	NA	NA
ALKBH7	20:53783948-53785563	ALKBH7L1	11:37810208-37810224	TCAACTTGTGTACTCCAAATTAATAACCTAACTTTCCACCTTAAGAAACTAGGAAAAAGGCTCCGGGGCTATGGCCGGGAGTGGGCGGCTGGCGCTGGGGAC	CAACATGTGAAATCCAAAAAAATAACCTAACATACAACCAAAAAAAACTAGAAAAAAAGAGTGAATAAAAATCAAAGTAAATAGAAAGTAGGAAGTTAAGGATTAGAATAAATATCAACGAAATAAAAAAAAAAAAAAAATAGACAAGACCAATGAAAACAAAAGTTGATTCTTT
ALYREF	9:398207-402787	ALYREFL1	24:28054629-28054645	ATGTCCATTTTGTCGGCCATGGCGGGCGCGGAGTCGGCCTCGGCTCCGGGAGAAGCATTTCCAAATCAGGGGTTATCGATCTAGCAAATACTTCAAATGTGTCTAGCAAATGTA	CCTTCCCATGCATTTTTCAGGTAGGACCAAAAAGCAAAGTCACCCAGTGTAAAATATGGCTGCCCTAGCCTCTCCCTTTGGGTGGGATGGGAGAAGCAATTTCAAATCTGGCGGTATTGATTTACCCAATACTTACAAACAGTGTAGCCA
AMD1	12:67432871-67453791	AMD1L1	3:10442938-10442953	AATGGAGAAATCTATTACATTTACAGGTAGGATGAAAATATTTAAAGATACCAACTTTCTCTAAGATAATTTTTAAATTTTTGGGAAAATAAATGAATGTGCTACCAAGATTTGTAGCTCAACTTGACAAACTCAATCTAAATTTATAGATAATATGTTAAGTCTAAAAGACTGAGAAGGGCTTCCACAGTATGGCCGGCGACATTAGCT	AAAAAAAAAAAAAAAAAAAAAAAATAAAAGACTGAGAAGAATAAAATTCTTTGAGAAGGAGAAGGAAGAGGAAGCAGCTTTGTACAATTTACATTATTCAGGGTCATACTTACTATGAAGCCAGAAGAGTGGAGACAGTGTATGTAACACTGGCATAAAGGTAGACAGATTGATGAATGGGAAATCATAA
AMD1	12:67432871-67453791	AMD1L2	4:51355081-51355097	NA	NA
AMD1	12:67432871-67453791	AMD1L3	23:34029067-34029080	NA	NA
AMD1	12:67432871-67453791	AMD1L4	24:41147679-41147694	CCCGTTAGAGAGAGTAGAGCGAGCGCTAGCTAATGTCGCCGGCCATACTGTGGAAGCGCCATTTTACCCCTTTCCCCTCTAGTTTTGTCCCAATGAATTTTTGTCTTTGATAGCTCTAATGGATTAGTCTAGAAATTCAAGGGAGAATAATGAAAGAGAAGTT	AAAAAAAAAAAAAAAAAAAAAAAAAGAAGGGGGAAAAATAAAAACATGCCAAGGGAAGTCAGTATCTGCTTATTTATCAGATAGCAGGGAGCACCATTAATCTCCTGTGCATGACCATGAAATGGGATAAATAACCAAATGACAGTTTTATGAAGTTAAGCCTGAATCGCATTCATTCTGTATCTTCTAGACATGCACTAGATGTTTT
AMT	20:39815449-39820528	AMTL1	21:30106761-30107585	NA	NA
AMZ2	9:14996647-15005546	AMZ2L1	25:25079486-25079500	GGGAAGGGGCTGTGCCGGGCGCCTTCACCCCCGCAGGCCAGGACGCCGCCGGCCCCCGCAGCCGCCCCTGCGCCGCCTTGGCAATAGTTTCAAAAGTAAAAGTGTATGTTCCCTTTTATTCAGCAATCTCATTATTAAGTTTGTCTTTTTTTTTTTTTGCAATCCCTGGTTGCATCTTTATTTAGTTATTAATATTTAATAATAATTAATAATGGACATTTCTTTCTTTCA	AAAAAAAAAAAAAAAAGAAACTATTGCCAAAATGTCCAACAGAAATACCACAACCACTCTACCTTCGCAACAATGGTATGAGAAAACCCAGTGACCAACATCCTCACCAAGATTACCGATAAGATAGATCATCAATCTTTTAATTTTTGATGACATTTTTACAGAGATAAATTATTGTTTTAATT
ANAPC15	21:25971680-25975556	ANAPC15L1	28:10588240-10588255	AGGTACCAGGTTGTTGTCTTTCTCTGCAATACTCTGGAGCCAGGCCTGATGCTGTTGTTCTTGCTGCTGCAGCTCTGTCTCCTCCACACAGGGTCGATCCAGATTAAACCACAATGTCTCAGTCACACGGGGGAAGAGTGAGGGAAACAAGGTGGACATGGCTCCTAGACGCGCCAGGAGGCGGCAGCCGGCGGCGACCCGGAAGCACTTCTCCTCCTCCTACATTACTGGTGAGAATGTAAAATGGTGCACTTTGGAAAACAGTTTGGCAGTTCCTCAGAAAGCTAAAAGTAGTGTTACCATATGACGCTGCAATTCCATTCTTAGGTGGATATATTCTTAGGTATATAGAGAAATGAAAACAT	TTTCTAACTCTCTTGAATAAAGACACAGGACTGAAAAAAAAAAAAAAAAAAGAAATGTAGGGGGACTTAATTTTCTCAACATTCTTGACAACACTTTTTATTTTCAGTTTTTTTTTTTTGGTAATAGCCATACTAGTGGATATGAAATAGTAGCTCATTATGGTTTTAATTTACTTTTCCCTGATAGGTAATGATACAGAGTAAACAAATGCT
ANAPC16	4:22860893-22889249	ANAPC16L1	1:114091957-114091970	CCTTGCCCCACCACGGAAAGCCCTTTTCAGCGGCGTGCGCGCCTTTCTGTGTGTTCATATGGAGATAACCCTTAGTCATCAAAATGGAGGTGTCAAACAGGCAGTTGGATAAGGGGTCTAGAGTTCAAGACGAGATTGGGCCAGAGAGAGACATTTGGGAACCAACAGCATATTAATGGCA	CCTTGAGCAACTGCAAGGATGAGTTGCCTTTTGATGAGATAGGGAAGACAGAGAAGATACAGACCAGGAAATCAGGAATTTGGTTTTCTGTGTGTTCTTTTTTTTTTTTTTTTTTTTTTTTT
ANAPC16	4:22860893-22889249	ANAPC16L2	16:24137388-24137388	CTTTGGGGTAGGTGAAAAGGGCTTTCCGTGGTGGGGCAAGGTCTGAGACACTGAAACCAGATCCAGTGACAGAACTTCCACTGACCCCACCAGCTGAGGAGGATGATGAAGAGGCAGCCATTTCCTCTCTAGCAGAATTCTCACTTCACTCAGCGGATTTGGCGCTTTCCCCTACAGCCCCGCCCCCAAGGGCCAGCCAGAGCGGCAGCGTTTACAACGACGAGGACGGCGGCGTGCGCGCCTTTCTGTGTGTTCATATGGAGATAACCCTTAGTCATCAAAATGGAGGTGTCAAACAGGCAGTTGGATAAGGGGTCTAGAGTTCAAGACGAGATTGGGCCAGAGAGAGACATTTGGGAACCAACAGCATATTAATGGCATTTAAAACTGGCTAGGAAC…	AAAAAAAAAAAAAAAAAAAAAAAAAAAAAAGAAGACACAGAAAACCAAATTCCTGATTTCCTGGTCTGTATCTTCTCTGTCTTCCCTATCTCATCAAAAGGCAACTCATCCTTGCAGTTGCTCAAGGCAAAGTCTTGGAGTTGTCCTTGATTCTTCTGTTTCTCTCTCATCCTCTTTCCCACGTGACGTCAATTTCTGTTAGTTCTACCTTCAAAAATCTACCCAAAACATGTTCACCTCTCACCACTCCCATGCTACCCCCATATTTGGTCTGGTCCACCCTCATCTCCAGCCTGGACCATCTCA
ANXA2	30:25176845-25210244	ANXA2L1	9:9057861-9057875	NA	NA
ANXA7	4:23933959-23961968	ANXA7L1	34:26944003-26944016	NA	NA
AP1AR	32:32083077-32123857	AP1ARL1	11:40556081-40556096	GGGGCTTTGCACTCCCCGGCCGTCCGCATGGCCGCCTGCCCGCCTCCAATTTTCCCTTTTTTAAAGAGAACTTCCCTATAAATTTAAATTTCATATAAACTTTGGAAAGTCTTTAGAATGGAATCATACAAGATGAAGTCTT	CAACTTGAGGACGATCCCCACTCCCCGTCTCAGACCTAGGCTACCTCTGATCTGCTTTTCATCTCTGTAATTTTCCCAATGAGATCCTTCCTTCTTCTTTCTCAGTATTT
AP1G2	8:3785085-3793081	AP1G2L1	2:81976906-81976926	NA	NA
AP1S2	X:12075797-12105911	AP1S2L1	1:16696389-16696404	GAAGAGAAGCCGTGTTGCTGTGGGGAGGGGACCCAGCCGGCGGAGGAAAGGCTTAGGCCCAGAAACTAATTTCATGGAAAAGGAAGTGCTTAATGTTAGGGTCATGGTCTACTTCAATCATAAGAGGTTTTTCATCAATTTTGAGTCCAATAAAGAACCAGGAAGAGAAAAAGCAGTGGTGAATGGCTGAAATGCCCTGGTCTCTGGGAAGTGGTCCCCACTGGAATCAGGAAATGCAGCCCAAGAGCCCTCACAAGCACACTTTGGGACAATCCAAAACCAA	AATTTTTTTTTAAAAAAAAAAAAGCGGTTTTAAAAAACAAAAAAAAAAAAAAAAAAAAAAAAAAAAAGAAATTAGTTTCTGTTGTGACACTTTTAGATATAAAGCAACACAGCCAATTTTAAGTCAAATTATTACTAAAAGGTCAATATTGAGAGAATGTCTTCCATTTTGGTATCCATTTTG
AP1S2	X:12075797-12105911	AP1S2L2	22:6250755-6250800	NA	NA
AP2B1	9:37946761-38078074	AP2B1L1	2:74242423-74242439	NA	NA
AP2B1	9:37946761-38078074	AP2B1L2	4:80628505-80628519	CATGATGGACAAACTAATCCTGTGGTGTTTTGGGTTCAGTTCTTATTGTAGCTAATGTTGATGATAATCAAGGTTTGGAATTTCAACAAGTCAGGGAAAATAACATGCAATAAATAGCAATTAGAAAATAGAGCACAATACAGGGATTCTATAACACACACACACACACACACACACACACGCGCGCGCAAATGGAGCAGAAGTCCCAGAAATTGTATGACACACACACAAGAAAATAATCAGAGGAAACCATTACAACACCACTCGGGCCGTGCTCTCTGGCTGCTGCCGCCACCCCCGCCCTTGCCTCCGGTGCACATTAAAGATCCAGAACCATGACTGACTCCAAGTACTTCACAACCAATAAAAAAGGAGAAATCTTTGAATTAAAGGCTGAAC…	GACTGTATGAGGTTTGCCCTTATAACTGGCCTGTTTCCTCAAAGCAAAGGGGAATGGGGGGTTGGGGCAAAACATAAATCATTCTGCCACCTAGCGGCACATTTATTTTCCTCACTATCTCACCTTTTCTCTGATTATTTTTTTTTTTTTTTTTTTTTTTTTTTTTTTTTTTTTTTTTTTTTTTTTTTTTTTTTTTTTTT
AP2B1	9:37946761-38078074	AP2B1L3	8:59522427-59522447	ACTGTTTTCAGGCTTCTCAGGGTAGGGCAGTATGAACCATGAGTCCTTTCTGAATTTGTGCTAGACCATAGATCCTACCTAATGTTGATCACCCATCACCCTTTGGAGCGAAATGTTGAAGACAGCAAGTCTGTCAAGTGGAAGGGATGCTCATGGGATGAGACTGTAAAGGACAAGCTCTTTTCCAATTAAAAAAATGGCAACGGCGAGACCTGGAGAAGGAGTCGTGACGTGCAGGAAACCATTACAAC	CAGAATTGCATTGCTGTTGAAAACCAGTATCATTCATTTCAGAAACACCAAATATCTCAGACAGCTGTGGTTCAGGGAGACCTGAACACCCAAGGAAGGTTCGCCGTTGCCATTTTTTTTTTTTTTTTTTTTTTTTTTTTTTTTTTTCTTTCTATTATCATACACTTTTTTCTTTTTTTTTTT
AP2B1	9:37946761-38078074	AP2B1L4	21:9856032-9856108	GATGCTGAAATCCCACAGCACAGAAATTTGGCCAGATCATGATCCATACATGGTTCAGAAAAACGGTGCCGCTAGAATATTTGATCAGGCCCGGTCATGAAGATGGAACCTCTGAATAACCTGCAGGTGGCTGTGA	GATGCCTGTGTGGCTCAGCGGTCTAGTGCAGAATATTTGATCAGAATAATCCCTTGCCTCATCCAAACTCTTCCAGAAGGTAACTTGGATAAATAATATAT
AP2M1	34:17071199-17080445	AP2M1L1	1:96951535-96951549	CGGCCCGCCCGGCCACTCTCCAGATCCCAAGATGTCCGCCCGCCCCCTGCTCTGCAATGACATTTAAAATTAAAAACACTACCTGTGAAACGCAACGCGATCCTGTTTTTTTAACAATATGTTGCGTATGTATTTTAAGTGGGAAGACAAAAACAAATGGAGAGGCTGAGGTAGGTTAATTCTGCTAATTCAACTGCCTTTTCTCTTCAGAGCGTTAAGGGTAACCTGCACATGTAATTGTTACCCAGAGGAAGATTTTATATGTATAAAAAGTATTTGGATGTCATTTGT	AGCACATGAATAAACTTATTTTAGGAATCGAAATGACTTCAAGTGGGAAGTTTCAAGCCCTGCCAGCAATGAGTCACGCAGGCAGTGTTTGTAACACTTTATTTCTGCAATGACATTTTTTTTTTTTTTTTTTTTGT
AP2M1	34:17071199-17080445	AP2M1L2	5:21849451-21849467	TGTCTCAAATAAATAAATAAAATCTTTTTAAAAAATACTTTCTTAAACATAAAATTTGAACCTATAGTGAAACTTCCTGGGACTATGCCAATTTTACATATTCATAATGCTAAAAGGGGATAGAATTAGCAGGCAATAAAGGAAGATAATTAGCAGAGGCCAAGGAACCAGCTTTGGTGATCAAAATGCATTTTTATTTAAAGTATTTCACAGGGCTGGCGAGCAGGGGGCGGGCGGACATCTTGGGATCTGGAGAGTGGCCGGGCGGGC	AAAAAAAAAAAAAAAAAATAAAGTATTTCACAGATGGAGAAACCAGCTTTGAGAAGGTGTCATTTGTCTACATTCCCACAGCAAATAAAAAGTAGGATGCACATATACTCATGTCTGTCCTATTCCAAGACCCACACTAATAAGTAGTAGGAATTTTGCTGTATTCAAATACATTTACTAAATTCAT
AP4S1	8:10342988-10397171	AP4S1L1	28:8500983-8501000	NA	NA
APEX1	15:17786808-17789422	APEX1L1	17:26699988-26699988	CGTGACCTGCTCGGGCCGCGGCCCGGTGCTCCTCTCCATCATTGACTCTATGTAACTAAATTCATAGGTCTGTCTGCAACATTTAACACAGCTGTCCCCACCCCCTATCCTGAATCTATTCCTAACATCCATTTTACAACATTCCTCTGATTTTTGTCCTTTCTGCCCTTCTCATTTGTAGCTTCATCTCTTTTTCTCTGCCATGAAATACTAGCATTTCTCTAGGTCTCCCTTTCCTCTCCCACTCTACTCCCTTTAGGTAATTAATTGCATGCAC	GACGTGTGCTCTTCCGATCTAGGGCAGAAAGGACAAAAATCAGAGGAATGTTGTAAAATGGATGTTAGGAATAGATTCAGGATAGGGGGTGGGGACAGCTG
APEX1	15:17786808-17789422	APEX1L2	20:50235839-50235853	TTCAGAATTGTTAACTCGTACTCCTCTGCCAAAGAAGGCCTCCTAGCTAGAGTTTAGTGTGTGTTTGGAGTTACTCAGCCTGAAATTATGTGCTCCAAGTATTACATTTAAAAGTTGCTTGGGGTGTCGGGAGAGGAGCACCGGGCCGCGGCCCGAGCAGGTCACGCG	AAAAAAAAAGCCAAAGTTTAAAAAAAAAAAAAAAAATAAAAAAAAAAAAAAAAATAAAAGTTGCTTGGATTAGTTCTCCCCTGTGCCCACATTAGTGTGGTTTCCCCTGTCCTTGTTGTTTTTATTTACTCATCATGTA
APEX1	15:17786808-17789422	APEX1L3	37:9988205-9988221	TTCTTGTTGTCTTTTTGAGAAATAAAAAAATATATGAAAAAAGTTTTGGAGGATCTTTAGAACTTTCCATTATTTATGGAAAGTTTGTTTTTGTTTTTAACACTTTTGTAACTAAAAGTCAAGTCTTCAAGCAAAAACAGGACAACAGAGTCTTTGTGTCGGGAGAGGAGCACCGGGCCGCGGCCCGAGCAGGTCAC	AAAAAAAAAAAAAAAAACAGGACAACAGCAGAGGGAGGGAATATCTGCTTTCTACCAGACCAAAGGGAGAGAATTCCCAGCAAAGGACTCAGGAATTGAGGAGCACAAGGGAGATGGATAAACAATTCAAATTCTTAGGGCATGTATTCCAGGATAATA
ARF1	14:835476-836424	ARF1L1	1:88248180-88248196	NA	NA
ARF1	14:835476-836424	ARF1L2	5:44197230-44197238	NA	NA
ARF3	27:5610078-5626635	ARF3L1	25:17577138-17577152	CCATGATCACCAGCAACCACTTTCTGAGGATAGGAGGGCTCAAGTGGGGGCAGTGGGAGTCTGGTTTTGGCTTGGTCCCGGGTGTGGAGAACTTGATCTTCTGCCCCACGAAGGGAGTACAGGGTGTCACCCTCAAATAAAGTTTGTATCACCTAAATTGTCTCCCGTAAACATTGTTTAACAGAGGTAAGATGTTAAATGGGGGACGACAGCCAGTACTTTAAGATGGCCAATGTTAGATGTCAAAACAAATTGCTGGACCAAAGTGCATTTTTTCCAAATTGGGTTGGTGAGCATGTTTTAGAAATTGC	TTAAATTTAATAGTTTAAAAACAAAAAAAAAAAACAAAAAACAAAAAAAAAACAAAAAACAAAACTTTATTTGACATTTCATTGAGTGAACAGTCTCCTTTCAGAGAACTGCAAAGTGGGGCGGAAGACAAGAAGCTTTTAAAGGATAAAGAAGGAAGAAAATGCAAATAGAAAGTACC
ARHGAP5	8:11190663-11269353	ARHGAP5L1	5:18750413-18750430	AACTCTCTATCCTTCAATTCTATATGATAATCTTATTGGCAGAATATTCTTTATTATGGGTTTTTCTCTTCAGCACTTTGATATATCATGCCATTGTCTTCTGGCCTGCACAGTTTCTTCTAAAAAATCTGCTGACAGTCTTATGGGATTTTTTTTTTAAACCATGTCCATTTTTTCTTTTGTCATTAAAGATAATTATTGGTGCGCGCCGGGAGAGATGCTGAGCAGAAAAAGAAAACTAAGAACTTCAATCCACCAACACGTAGAAATTGGGAAAGTAATTA	GTACTTGTTAGAGTCCTTTCCATGACTTAATCTCCTTGAAAAGTATCAGAGGAAAACAAAAATTATCTTTTTTTTTTTTTTTTTTTTTTTTTGACTTTTTAAAATT
ARHGEF9	X:49101034-49312796	ARHGEF9L1	7:38550044-38550058	NA	NA
ARL14EP	18:36961451-36980631	ARL14EPL1	37:4573243-4573256	ACTTAGTCCTCTGCGGAGCTCCGGCTGCACCCGCCTTCGCCGAGAGCCCACTCGGCCGCCCGAAACCCTGTTTTAATGAACAAAAATTATAACTATTCCTAGTGAGATTCAGGAATAGCACCTAACTAGAAAAATAAAATCCCTGCCTTTTT	ATTATATTAAACAGAATAAAATAAACGGATTCATGAGTGGCTGACATGAATCACTGCAAGAATGATGAAACCCTGTTTTTTTTTTTTTTTCTATAATAAA
ARL2BP	2:59127139-59133993	ARL2BPL1	5:24694092-24694107	NA	NA
ARL2	18:52169225-52174561	ARL2L1	15:26771558-26771574	CTTCCCCGTTGAACTTCTTGAGGATGGTTGTTTTGCCAGCATTGTGTAAGACAGTATTCTAAATCAGTGGGAAATTGGTAGACTTTCAATAAATCTTACTTAAACCGTTATCTATACTTAAAAAAATTATT	AGGGTAGATAAAGTAAAATAGTATAGAAAACGACAACTGATGGAGGCCCATGCATATATGCTTAATTGATATTGTAAGACAGTATTCTTTTTTTTTTAAATGTGATGTGAGCCATTGGAAGCTTTTGAT
ARL2	18:52169225-52174561	ARL2L2	16:46867832-46867848	AGAAGCCCCATGGTCCCTGCGGCCCCCTCCCGGCCGCCGTTTCTTCCTAGTCGGGACTGAACAATTTTACAATGATAAGTTGTCCCCATGAACATGATAGTAATATTCATATATGCAGGATTTCTTGCCTCCTCTTTATTTCAAAATTTTTAAAAAATTGAATATTAACAAAAAGATACATGTGTGTAATAAATCGAA	TTGTATCAATGTAGACTTTTATGATTATCATTTTCTTTAAGTGACACCTGTTTGCTTGGAATTGCAATAAATTTATAGATTAATTTTGGGGGACTGAACAATTTTTTTTTTTTTTTTTGAGGGCAAGAAAGGATTTATTCTTACAGCTGAGCAACACGGTTGGGGCC
ARL2	18:52169225-52174561	ARL2L3	29:29130696-29130712	NA	NA
ARL8B	20:12479680-12525330	ARL8BL1	16:33751060-33751086	NA	NA
ARMC10	18:16994583-17020417	ARMC10L1	3:20272242-20272242	NA	NA
ARMCX2	X:75517183-75521486	ARMCX2L1	5:43413150-43413160	NA	NA
ARMCX2	X:75517183-75521486	ARMCX2L2	19:32312214-32312230	NA	NA
ARMT1	1:41799853-41814684	ARMT1L1	20:12680966-12680982	GCCCGCGTCGCACCCGCCGCAGGGAGGGAGTATCTCAAATATTATTGCTGAAGATTTCACTGTTGGCGATATAAAGGTTTGAGGAATTCATTTTTTAAACTTTCAGAGGAGCATTTGTTCCTCAGAAGGCTAAAAAGTTCTGACAGATATGCTAGGAGAGGAAAAGCCTTCACAAGAGCACTTGGCCAATGTTTGCTAAAATCCTGTGCTTAGC	CTCTCTATTTTACAAAGAATTAAAGTCTCTCAGACCATTTTTTAAAGAATGTAATTGTTTCAGTTTTACCCAATAACTGTAATTCTTATTTCTTTCAGTTCTGCCTGACTAGGATTTAAGATCTGAAATAATTTCTGTTCCCTGAACTATTATGTTTGCCTCCATGAAAACTGGTTATCTCAAATATTATTTTTTTTTTTTTTTTTTTTTTTTTTTTTCA
ARPC1A	6:10212203-10245112	ARPC1AL1	24:25075559-25075574	ATTCATTTCCCTTTTGGAAATTGTTTATGTCCTCCGCTCATGTTCTGTTGGACCTTCTTTTTTTAAAAAAAATGCATTTACTTTATCATAATATATGTTAATATTAGAAATATTTTCCCCGCCCTCCGCCCGCGCCCGCCGGAGCCTGTTCGCGTCGACTGACCAGAGTCCGCGAATT	AATAAAAAAAAAAAAAAAAAAAAAAAAAAAAAAAAAAAAAAAAAAAGAAATATTTTCCCCAATCTGCCTTTTAATGTTATATGTTGAACTGTATGCTTTGCCATTTTACATGCCAAATATGTCAAGCTTGT
ARPC1B	6:10192299-10198383	ARPC1BL1	14:34916675-34916690	NA	NA
ARPC5	7:16976392-16986015	ARPC5L1	22:14330970-14330986	NA	NA
ARPC5L	9:58142001-58149285	ARPC5LL1	9:56075459-56075473	CCATGGGGCTTGATACCAGGACCCTGGGATCACCACCCCATGGGGAGTCTGCTTCTCCCTCTCCCCCTGCTCATGCTCTCTCTCACTTGTTCACTCTCTCTCTCTCTCAAATAAATAAATAAATAAATAAATAAAATCTTTAAAAAACATAATGAAAACTTTATCAAAAAACACCATAAAGAAAGTTAAAAGGCAAATAATGAACTGTAAGAAATACTACGTATTTGACCACAAAAATTTTCTTAATAGTGCTTCAATTAGGAAAAGATAAACATTCCAAAGGAAATTGACAAAGTGCATGCAAATATATATCATTTTCAAAAGAAATACAAATTATAAATAGAAAAAAGTTTCACCTTGCTACCAAAGAAATTAACCATTTTAGCAAATATTTATAAA…	AAAAAACATAATGAAACTTTATCAAAAAACACCATAAAGAAAGTTAAAAGGCAAATAATGAACTGTAAGAAATACTACGTATTTGACCACAAAAATTTTCTTAATAGTGCTTCAATTAGGAAAAGATAAACATTCCAAAGGAAATTGACAAAAGTTCCTACTTATGAGCTGTTATCGG
ARPC5L	9:58142001-58149285	ARPC5LL2	24:19655325-19655339	GATCTACTCCGCTCGGAACCGGCTCCGAGCCATGGTTTTCATTTTGAACTTGAACAAGTCAAATACATACTAAAATAGTTTTTAAAAGGAACCACTAACTCGTAAT	ATAAATAATAAAATCTTTTTAAAAAATAGGACTTATTTAAAACTAAACTGACATTCAAACACAGGCCACAAAAGTGAGCCATGGTTTTCTTTTTTTTTTTTTTTTTTTTTTTTTTTT
ARPC5L	9:58142001-58149285	ARPC5LL3	25:12219994-12220069	CAACTAGCACAGCTGCTTGACGCATACGTAAAAGTCGATAGAATGATAAGATGAACCCCAAGTACCCATGACTCAGCTTCAATAATTGTAAATTTATGACTATCTTATTTCATCTATCTCTCCTCTCACCACCACCACAATTACTTGGAAGCAAGTATAAGTCATGATTTCATCTGTCATCACAGGGTAAGAACTCAAAAAAACCCAATTTCTCTATGCCATTATCAAAAGTACACATGCACACAAATTAACAAAAGGAACGAGCCCAGGGCGTGGTGCTGAAGGTGCTTACCGACTTCAAGAGCAGTGAGATTGAGCAGGCTGTGCAGTCGCTGGACAGAAACGGCATTGACTTGCTAATGAAGTACATTTATAAAGGGTTTGAGAAGCCCACAGAAA…	TCCAGGGTTTCCCAGTTATTATTGTTGATATACAAACCATATTCTTAAAGTTTTATCTTTTTATTCTTAAAGTTTTAATGAGGATCTAAAAAATCCATGTATTGCAATAGTGTAAACCCTCATTAAAACTTTAAGAATAAAAAGATAAAACTTTAAGAATATGGTTTGTATATCAACAATAATAACTGGGAAACCCTGGAAAGGAGCCACACTGG
ARPIN	3:52870775-52880742	ARPINL1	19:41550395-41550830	NA	NA
ARPP19	30:18190358-18213054	ARPP19L1	7:49240189-49240199	ACATGAGAAGAATAGAGACTGTGATGTGAGACAAACTTAGGTTTGGGCTTTTGGTTTGTTTTTTTTTTTTTTTTTGAAAGGTGGTCATGAAACCATTCATGTTATGTT	GGACATACTGCTCCTTCTTACCCCGCGGCTCCGGCCCTGCCTTGGTTTGTTAATCTATGGTTCATTTGACAAATCATTTACCCTTTTCAGGACTCAGTTTTCCCATTTTGCAAGCCAAGAAT
ASF1A	1:58821324-58834935	ASF1AL1	5:6439269-6439287	CAGTGTTTTGCAGCTTTCCTATTTCACCCCTAATGTAGTTTTCTTGAAAGAGGAACATTGTTTAGCTTAACACCCATTTCCTTACACTACTTGTGATGGTTAGTCACATG	TGCTGATAGGGAGGAACATGAAATCTGTTTTTAATTCTGCCAAATTTTAGAGTTAACTCCATTTCATTGAATCCCTAATGTAGTTTTCTTTTTTTTTTTTTTTTTTTTTTTTTTTTATTTATTTATGAGACAGACCGAGCCGGAGAGCGAGGAATAGTCAT
ASF1A	1:58821324-58834935	ASF1AL2	6:51413411-51413426	NA	NA
ATF1	27:3904635-3992949	ATF1L1	5:47984508-47984523	NA	NA
ATF2	36:19032376-19103147	ATF2L1	12:46025815-46025914	NA	NA
ATF4	10:25528880-25531018	ATF4L1	10:46881231-46881265	AAGGGTTTGAAACCCAGTCTGATTTCAAAGCATATATTTATTCCACTGTTACATTTATAAACAGTGGGCAAACTTTTTTTTAAAGATTTATTTATTTGAGAGAGAGAGAGAGAACATGAGTGGGAGGGGCAAGAGGGAGAAAGAGAGAGAGGGAAGAACGAGGCTCTGAAGGAGAGGGCAGATTCTTTAGCTAAGGAGATCCAGTATCTGAAAGATTTGATAGAGGAGGTCAGAAAGGCCAGGGAGAAGAAAAGGGTCCCCTAGTTGGGGGTGTCAGGAATGTGTGCTTGTACATAGGCTTGCGCTGAAGCTGTGTTGTA	GGGTGAAGATGTGTTTTAAAAAAATTTTTTTTATGGAAAAAAAAAAAAAAAAAAAAAAAAAGAAAGAGAGAGAGGGAATCCTAAGAAGACTCTGTGCTAAGTATGGAGCCCACCATGGCTCAATCTCCAGACTTGAGATCATGACCTGAGCTGAAACCAAGAGCTGGCACTCAGCTGACTGTGCCACTCAGGCGCCCTCCTTTTTCTTAAGTAATCTCTTTGTCCAATGTGTAGCTTGAACTCACAACCCCAA
ATF6B	12:1515186-1525165	ATF6BL1	23:25945135-25945240	NA	NA
ATG4C	5:47273387-47358760	ATG4CL1	13:62048244-62048260	NA	NA
ATG5	12:63565859-63692383	ATG5L1	15:29474680-29474694	NA	NA
ATIC	37:22420645-22446769	ATICL1	30:35371075-35371138	CCCCAGAGCCATCCCATTAAAAGCCAACACAGAAAACAAAGTTTCCTGGAGAATAATCCTTCACTTTGCTCTATACATTTTATTGCAGTTGGAACCAAAGTATCTGCATCTCGTAGAAAAGCTGAGACCAGATGAAAACGAAGTTCGAACTCTCTTTGGTCTTCGTTTAAGTCAGAAGAGAAATAATGGTGTCATTGACAGGTCATTATTTAGCAA	AAAAAAAAAAAAAAAAAAAAAAAAAAAAAAGAAAAGCTGAGACCAGAAATGCCAGTTCAAAGAGAGTTTCCATAGCCCAGAATACCTGCTGTCCCCTTCCAACTTGCCCAGAGACAGAATGTGTCCGGAGGAGGAGGTTTTCTCTATTAAATGTATGAAAGTCGTTTTTGTAAATATGATATTCCCATAT
ATMIN	5:70779676-70795829	ATMINL1	3:20554858-20554873	NA	NA
ATMIN	5:70779676-70795829	ATMINL2	5:25275158-25275355	NA	NA
ATOX1	4:57599927-57608891	ATOX1L1	9:25099300-25099317	NA	NA
ATP1B3	23:37684507-37727535	ATP1B3L1	16:56792052-56792069	NA	NA
ATP5MC1	9:25123194-25125959	ATP5MCL1	21:32057066-32057116	NA	NA
ATP5MK	28:15761732-15767892	ATP5MKL1	4:39851307-39851307	NA	NA
ATP5MK	28:15761732-15767892	ATP5MKL2	9:18600348-18600360	CCAAGCATGGGAATTTAACAGATGAGGTCCAAGTTAAAGTCCATTTATGTTGCTTTCACAGCTGGTGTTTTTTTAGACCTTAATTTGAAGTATAAAATCATCAAAGCAATGCCTCCGTATGTGGCCAATACACAATTCATTCTACCTGTGAGAGTGTAAGAGTTGAAATATTTTTTGATACCAGTGAAATGGAATTGGGCATCAGTTTCTGGACCTGCCATGATTTCAAGCTCCAATTCCTTTCCCCAATTCTCCGCTGTTCTCGCTCCCCAAAGCAAAGACCTAGCGGCGTTTCTGCATCAGGAACGGTCGGAGTTTTGTGCCACCCCTTCAAAGCGGAGGCACGAAGCCTGCGCCGGGGATCCCGTCCACACACCCACCTCGCAAAAGGTAGCAATT…	AGAAGAATGTTAAATTAACAAGATTAGAAAAGAAAATGTAAAAAAAAAAAGTAAAAATAAAATTTTAAAAAAAAATAAAAAAATAAAAAAAAAAAAAATAAAAAATAAACATGTTGAAATCTACTGTGTCTAAAAGAGTGGGATCCGGGCAGCCCAGGTGGCTCAGTGGTTTAGTGCCACCTTCAGTCCAGGATCTGATCCTGGAGACCCGGGATTGAGTCCGACG
ATP5MK	28:15761732-15767892	ATP5MKL3	32:35012836-35012852	NA	NA
ATP5PO	31:28472106-28481759	ATP5POL1	10:26210863-26211604	NA	NA
ATP5PO	31:28472106-28481759	ATP5POL2	22:18581920-18581935	CGGGGCGGCCATCTTCTCCGGGGGGCTGTAGGTCAAACCCGCGTCCCTTCCTCTTATTTCTGTGTAACCTCCCACTCCACCAGTGACAAATATGTATCTCACCAAGCATTATCAATTTATGCCACCATTTTATTATTTTACATTTAGATAAATTTATTTTAATTCGCTTATTTATTTTATTTATTTATGAAATTTAAAGAATCAACTGATATACATCT	AAAAAAAAAAAAAAAAAAAAAAAAAAAAAAGAAATAAGAGGAAGAATCTAGAATAATTCTAATGGTTATTATTCCATAAAAGAAACCTGAACTCCTTGTTAGAAATGGCCTATTTTAGGGCAGGTACAGGGGATATACAAGATGTACATGTAGTCTTATAATATCAAAATTTAAGAAAATACCATTCAAAAACCACAGTCCACC
ATP6AP2	X:35050588-35073633	ATP6AP2L1	32:23908686-23908722	NA	NA
ATP6V0C	6:38519869-38525217	ATP6V0CL1	14:41371333-41371348	GGCGGGCGAGGGAGCGCGAGGAGCGGTCAGGCGGCTGCGAAGGCGACCTCTGGGATAATTTTTAATTAATCTCCTGAAAATAAGGAGGTTGTAAAAAAAAACAAAAAAACAAATAAAAGGTGTTTAGAAATCAAACCTAGAACTGTTTTGCTCCTGGATACACAAATCTCAAAAGTCTAGAAAGTTATTTTTTTTTCTATTTTTATTTTATTTTAAGTTATTGTTTT	GGGGGAGACGGGTCAAAAAAATCTCTTGGTTTGGATGTGAAAAAAAAAAAAAAAAAAAAAAATTATCCCAGATTTACACTGTTGATTCATTATTAATATGTAACTTTATATATTTTATGCACACACACACACAAATACACAAAGTAACTTGTTTCTTTAACCTGTTCTTTCTGGTGAAAACAGTGTTATCAGTCAAATCTAGAGATTTTGAGCGACATAAAACTGAAAACAACCCAATATT
ATP6V1B2	25:36833246-36858846	ATP6V1B2L1	20:50315-50330	NA	NA
ATP6V1D	8:41332581-41354058	ATP6V1DL1	3:74239924-74239935	NA	NA
ATP6V1D	8:41332581-41354058	ATP6V1DL2	5:63007824-63007839	GGCAATTGTGGCTGCAACAGCCCCAGCCACAGGGTCTTCCTCCACGGGAGTCAGCTGATTGTCGAATGGTCAATTCTTAAGTAAAATTTTCTTTGATGGAAAACATAACCTAACCATAAGTCATTCCTTTAAATGATTCATATTGGTAAGCATCCTCTGAAGGGGAGACCTGCACACACAGGCAGTTCTCGGAGCGTGCACCAGACACACGGCTGTTGGCAGAAAGCCCACTG	AAAAAAAGAAAAATAAAAAAAAAAAAGACAAAAAAAAAAACAAAAAAACAAAAAAAAAAAAAAAAAAGAATTGACCATTCCTCGGGGCGGCCCCTGTGGCTCAGTGGTTTAGCGTCGGCTTCAGCCCTGGCAGGGCCTGATCCTGGAGACCCGGGATCCAGTCCCGCGTTGGGCTCCCTACATGGAGCCTGCTTCTCCCTCTGCTTGTGTCTCTGCCTCTCTCTCTCTGCGTCTCTCATGAATAAATAAAATCTTAAAAAATTTTTTTTGACCATTCCTT
ATP6V1D	8:41332581-41354058	ATP6V1DL3	30:18596557-18596573	NA	NA
ATP6V1D	8:41332581-41354058	ATP6V1DL4	38:3593063-3593082	CGGTCTTTGCCCGACATTCTGACGATGATAGTTCGGCTCGGATCCCTAGCCGGGCAATTGTGGCTGCAACAGCCCCAGCCACAGGGTCTTCCTCTGTACACTGAAAATTATAAAAAATTAGTGAAACTTTTAAAACTATGTAATGGGGAAATATGCTGTATTTATACCTTGAAAAAGCATATTAATATGTCAATTTTTCTTAAGTAAATTTACAGATTTAATGCAATTCTAATAAAACATAGCAGATTTTTCTGCAGATCACAAGCTAATTTTAAAATTTATAGGG	AATTTTAATGTGATTATGGTATAAACAGTAAAATGATTTAAAAAAAAAAAAAATAATAATTTTCAGTGTACAAAATCCTATACATATTTAATTCAATTTATATGCACTTAACTTTTGGTGCTATCATAAATGATACTGTTTCTTTAATGTCAAATTACAATGTTTACTGCTAGTGTATAGAAATGTGATTAGATTTTATATCTTACAAATT
ATP6V1E1	27:45222647-45249317	ATP6V1E1L1	5:1488026-1488039	TTTGCTTCATTTAGTAGGTCTGTAATAAGGTCATCTCTTGCTCTGAGGACTTTGAGCCTTGCTTGATTCATCAAATTAGACATCTGAATTTTCTTCTGCTGCTCAATCTGCTTTTCTTTCTTCTCATAGTATTCCATAATCTTCAGTCTTTGGGTTTGCACAAGACGACCTTTCTCAATGTTGAACTCTTCCTCTGCCTTCGCATCTATTTCCTCTGCTTTCTCGTTGGCTTCTTGTTCAATAAAAGCCATCATATGCTTAATCTGCTTCTGCACGTCGGCATCGCTGAGGGCCATGGCAAAAGCTGTGCTAGGCCGGAAGGCCACTGGCTCGAGCTCAGCCTGGAAGGCGACAGCAGAGAGCAGGCAATGCTTTGGAGTAGAAGGCTAGAGGGCATGT…	GCATGCGAGGCTGTCATGATGTTGTTTCCCTTTCCTTTTTGTTATTCCTTTCCTCTTCTCTTGCAGGTGGAGTGTGGTGCAGTGGGAAGGGCAAAGCTTTGTTTTTTTTTTTTTTTTTTTTTTTTTTTTTTTCACTTTAACCTTTTGTTTTAATATTTTCTTTATTTTCTTGTTTTCTTTTTATATCACTTTTT
ATP6V1F	14:7786841-7789584	ATP6V1FL1	7:54082720-54082737	TTTGAGAAGTCCTTTAAAAACTTGCTTTGTGGTATCCCCACCCTATGAGGTCAAGGGCTTAAGAAAGAGCAGAAGAGTTCGTCGTCTAAGGGCCGTCGCCGCGGAGCTCTAC	CCTATGAGATAAAAGGAATAAAAAAGAGCAGAAGAGAAGAGGAGGGGAAATGAGCAGAGAGAGAAGAACTAATGTAGACCAGAAAGAGAAACTACATTTCCAAGAACAGTATAAAGTTCCCATATAAAGCATATAAACTGTAATTAAAATT
ATP6V1F	14:7786841-7789584	ATP6V1FL2	21:32809475-32809492	TAAATAAAATCTTGTAAAAAATTTTTATCTATTTTGCTCATTTTTATTGAGTTGTAGAAATTTGTTATATATTTTCCATACAAATCCAGTGTCAGATATATATATATATATAGTGTGAAGATATTTTTCCCAGTCTGAGGCTCATCTAATCTTTTTCTTAATGTTGTCTTTTGGTGCTTCGTCGTCTAAGGGCCATCGCCGCGGAGCTCTACCTGCCTGCGAGAAT	AAAAAAAAAAACTTCCCTTTTTCCCAAAAAAAAAAAAAAAAAAAAAAAAAATGTTGTCTTTTGGTGAGCAGAATTAATTTTGATGAAGTCCAATATATTGGCTTTTTAAAATTGATATGCATTTTTTCATCCTATGAAATCTTTACCCTAAGGTTACAAAAATATTCACTTTTCTTCCAGAAGCTTTAAAATTCTGAGTTTTGTATTTCAAGGTATAGAAGCCTTTCAACTTTGTTCG
ATP9B	1:1136862-1374102	ATP9BL1	8:18441536-18441556	NA	NA
ATXN10	10:20277339-20440747	ATXN10L1	8:35710540-35710565	NA	NA
ATXN3	8:1318440-1354709	ATXN3L1	2:57789934-57789954	NA	NA
ATXN3	8:1318440-1354709	ATXN3L2	11:33818434-33818439	TCAAGCAATGTTGAGCACAAAGTGAGCCTTCTTGTTTCTCGTGGAAGATGGACTCCATGTTTATTTGTCTCTATTATTTTATTTATGATAGTCACACACAGAGAGAGAGAGAGAGGCAGAGACATAGGCAGAGGGAGAAGCAGGCTCCATGCACCGGGAGCCCAACGTGGGATTCGATCCCGGGTCTCCAGGATTGCGCCCT	CATCTTATATGTTGTCTCTAATGTAGTTTTCTTGTAGTCAAGGTTATTTGACTTTTTATTTATTGTATTTTATTTATTTATTTATTTATTTATTTATTTATTTATTTATTTATTATTTTATTTATTTTTTTTTTTTTTTTTTTTTTTTAAATTTATTTTTATTTTTTTTTTTTTTTAATCATTTTTTTTTTTTTATAT
AUNIP	2:74097435-74116824	AUNIPL1	3:59142806-59142823	AAAGAGTTTTAGCATTTGGGTGCTTGGCTTCATTAAATGTGTCTGCACTCTCCGCCTCTTCAGGGCCGCCGCGTCCAGCCACACGCCACAGGCCTCCTCCTCGGGGCCCCTCCGCCTCATGGCCGCTGCCGCGTCCCGGCCGACAGCTCCCCGGCTCCCCGGGATCTTTTATTTTCATTTCTGGATTCCCCAACACCCAGCAAACAGAGGGCCAGGTACACCTTAGGTCTTCGGAAACAGGGGGTGGGTGGCTGGCTGTCTCGGGGGCACACGGTGTTTTGTGATCAAATCAGAGCCAGGACCTTGCAATGGTCAAGCTTATGCGTCAGCTTGGCTGGCCTCAGTCAGGGATGCTGGATAGATGGTGGCACGTTAT	CCTGGTACATTGTCCCCAGAGGGAAGGACTAATCTGTGTGTTCCCTGGACCATGGGGTCCTTGAAGGGAGGGAAGGGATCTTTTATTTTCTTTTTTTTTTTTTTTTTTTTTTTTTTTTTTTTTTTTTAAATAGCCATTTATTTGGGTTCTTAGTTTTACAAAGGG
AURKA	24:41585483-41604875	AURKAL1	8:28106642-28106703	GACATTTTGCCTTTATTAGAGAAAAATCATCAAAGAAAATCAGCCTTAAAATAATTATTCTAGGAGCGCTCCGGGGGACTCGGCGGCTTGGGTCGGAGGCTG	ATGTATCATATTAAGATTTCAACTTTTTATCAGTTTGTCTTATAATGGCTTTGCAGTGTTGTGTGACATGTCTTTTTGCCTTTTTTAGAGCAGAATCATGCATGTTTTGCAGCGTTAACATAATTATTCTAGTTTTAGAATTTTCGTCGTTGTGGGAATAAAATAGTTTGGTTAATTCTAGAAATAGGAGGTTAGTTTTGGGCTTAGATAGGATCAATATTCATCTTTTTCCTTATCCATTTTTTCCTTATTTCAAAGATGTAAGCTCTCAGTAATCAAAATCTTTTTGAGATTATAATTTATGTCTGACACAGGAAGCATCACTTCACTTTTATAGCTTTTTTTTTTTTTTACTATATATGATAATACCTCTCAATGAAGGAAAACAGATGGTACCTC…
AURKA	24:41585483-41604875	AURKAL2	31:8423162-8423179	CTTTAGATTTGTCCATAATGCCCGCCGGCTCCAGCCTCCGACCCAAGCCGCCTATTGCAGTGCATTTATAATGTAACTCATACATTTGAGTATAGGATTATAATCTCAGATTTTATATTTTTGAAATTTATGCAAAGACACTCTCTGGGCAGTCATATCCCTCAACATAGCTTAGCAAGTGGAACTCAAGCTACATTTCATATACATTCGCCTTTGCTGGGTGTACTTGTGCAGTGCATA	ATTCTTTCTTTTAAATGTTAAAATAAAGATTTTTATAAAGAAAAAAAAAAAATAAATGCACTGCAATAAATTGACTTTAATCGGTATATTTCTCATTGTTTTAATCTGTTTAACTTTTCTAACTCTTTTTCTTTAATTTCTGTACTTACTCCCTTTTAATTTGAAAACAGTGCACTGAAGACCTTAACCACCTGTAAATGGACATCTTGGTGAGAACCTAAGCTCTCATCAACTTC
AURKB	5:33014098-33028951	AURKBL1	21:30814012-30814025	CCGTGGCACAGCCACCCCCTGGCCGCGGGCAAACGACTGAACCTTTGCTTTGGTTTTATTTTGCTTTTCTTTTTTTAAGTTTTTGAGAGGCCAGCTTAGATTATGATTTGAGACTTTCCCTCTTTTCTAGTATATAAACCACCAAGAATATATTTATAAATATTGTATTTATCCACATTTTTGCTTATCATCTACTTTCTTCTTTCCTAATGTTCCTTTTTTTAAAAAAATAATTTC	TTTAAAAAAAGGCAAAAATTTTAAAAAAAAAAAAAAAAAAAACCAAAGCAAGAAGAAATAACAGAATAGAAATCAGTGAAAATAGAAACAGAAAAAATTAAAATAATGAGAGAAAAATGAAAAAAATCAATAAAATTAACAAAAATTTAGCAATACTAAAAGAGAAAAGAGAGAAGACACAAATTACCAATATCAGGAATGAGCAAGGGATATC
AURKB	5:33014098-33028951	AURKBL2	32:21028089-21028105	TAATAATAATAATAGAGTAGCCAAACTACGTCCTTTGAATCTTGAAAAAGGCTTTAGTGACTCATTTTGTACAATGGGTTAAGAAAAAGAAAAACAGAGTCAGTTTGCCCGCGGCCAGGGGGTGGCTGTGCCACGGGCTCCAGCTCTCCTCCCC	AAAGGCTGAAACTTTTTTAAAAAAAAAAAAAAAAAAAAGAAAAACAACATACTTCCAATTTGATGGTTATTTTTATTGTGTAGAAATAACTTTTGAGAGATACTTAAGAAAGCTTTATAAAAGTTTTTAAGATATACCTCTCCAAATTATCCCACATAAAAATCTTGTGATGGTGAGAGACCAGAATTTCAGAATAGTTTTCATATAATTCAAAT
BABAM1	20:45466808-45474953	BABAM1L1	16:44277498-44277530	GAAGTGGCATAGACAAAATCTGGCTCAAGCAACCTCAGCAGAAGAAGACCTGTTCTTGTTTTGGTTTGGTTTGTTTTTTCAGGAGAGGATCTTGATGACATAACCTGTGGACATTAATGTTTCTTCAGCCACCACTGTCCCTGACCAGTAAGCTCACAACGTTATCATGCACCAGAAATAGAAGTTGCTAATGGGACCACTTCCGGGCTGCGAAAGATGGCGGCTTCCTAGTCAGTTCTCCGCTGAGTTGGAGGGAGGCTCAGCCTACGGGGAGGATCCTGGCTTCTCCCAACCCTGCTCCATCCAGCCACTTAGGGGCCATGGAGGTGGCGGAGCCCAACAGCCCCACCGAGGAAGAGGAGGAGGAGGAGGAGGAGGAGGAAGAGGAAGAGGAGCAGT…	AAAAAAAAAAAAAAAAAAAAAAAAAAAAAAGAAGTTGCTAATGGGCCCGGCAACATAGAACTCATGAAAATGATCTGCTTTTAGCCACTGCTGTCCTACTGAATGCCCAACCTGTCAACAACAAAGACCGACACTGATATGGCACCAGTCCCCAGGAATATCAGCCAGACAGTGGTGGTCAGATGATTACATTGGACCACTTCCATCATCAAAGGGAGAGTTCTTTGTTCTCAGTGGAATAGAAGCATATTCTGGATATGGATTTGCCTTTCCGGACCTTAATT
BACH1	31:24269310-24310369	BACH1L1	5:87384405-87384419	ATATACATTAAATCTGTCTCTCTCCACTATTCCCCACTTAAAAAAAAAAAAAAGAAAAGAAACACTGTTTCTTTTCTAGGGTGAAAGATGGATACATAAATGAACTGAACAGAGTGAGTCACCTGACCGCTGCCCGCGCCGCCCGCCGGGCTC	AAAAAAAAAAAAAAAAAAAAAAAAAAAAAAAAAAAAATGAACTGAACAAAATGAGTTTCAAATAAGCCATTAAATGCAATGGAATAAATAAATAAGTAAATAAATAAATAAATAAATGCAGAGGTT
BAIAP2	9:923519-992254	BAIAP2L1	5:28961404-28961418	NA	NA
BARD1	37:21946770-22024672	BARD1L1	11:21614333-21614483	NA	NA
BARD1	37:21946770-22024672	BARD1L2	23:8633548-8633563	NA	NA
BARD1	37:21946770-22024672	BARD1L3	33:19973616-19973632	NA	NA
BCAP29	18:12969594-13021948	BCAP29L1	22:35378765-35378781	CCACAATAGTGAACATATTCTAAGATTTATAAAAGTTTAATCGAAATGGTATTCCCTAATAATTTATTGAATTTTGTTTGAAGGGAAAATCAGACATCTAAATACAACAAACTTTGTTTAGGGAAGGAGGGTATTTGGAATTAATATGCCATTTTACCATTCAGACTATTTTTGCCACTTCTCATTATAGAAAGGCTCAAACAGCAACCATATACTAGTATTACTCTCAACATCTCAATAGGGTGCTTATCAT	CATAGGTTTATTATATTGAGTTTATTTTTCCAAGATATACTCTTTAGGGAAGCAAATTATCTGAAATATCTATGAATTATGGTGGAACTGAAAAATTGCACACTGAGTAAACAGGAATTTTATCTTAAAACCTTGTTTTATAATTTGCAGGATCATGGATTTTACTAAATATAAATGAACATAATTGCAGCCTCTATGCAAATTTGAATTTCATAATCAATTTTGAGCCTTTCTATAGACCCCTGTCCCCTCCCCGCCCCCCCGCCGCGGCGTCTGACGTCCCGCGCGTCGGCCGCGCGGAGCTGCGCCTGGAGCCAGGCGGGCGGCAGGCGGGATGGCA
BCL10	6:62712937-62723852	BCL10L1	5:80845564-80845578	TTCCTTCCTTTCTTTCTTTCTTTCTTTCTTTCTTTCTTCTTTCTTTCTTTCTTTCTTTCTTTTCTTTCTTAAGATTTTGAAATTGGCGGCGCCCTCGGCCCCAGAGG	AAAAAAAAAAAAAAAAAAAAAAAAAAAAAAGATTTTGAAATTATAACCCTAAGATCAACACCTGAGCTGAGATCAAGAGTGTGATGCTAAAATGACTGAGCCATCCCCAGCTTCTACTCATTATATTACTATGTTTTATTTTTTAATTTTTAAAAATATTTTATTTATTTATCCACAAGACACACA
BCL2L12	1:106865346-106873329	BCL2L12L1	11:23711032-23711047	CTTTTATTAGTGCAACTTTCCCGCGCCTGCGCACTGGGCCCGTATTCAACATTTCTTAATCAAGTATTTCCCAAATGACCTCGGGATCACTTTCTCATAAAACACCTTTTGGCA	AGGTGCTGAGAAGTCCCAAACCCAGGAAATGTATTCAACATTTCTTTTTTTTTTTTTTTTTTTTTTTTTTTT
BECN1	9:20204203-20214809	BECN1L1	37:6766932-6766945	GCAAATTAGGTTTTATTAAAAGTCAATAATTCCCTCTCCTTATTGAAATCCCTTATTTTCTGCAGTATGACTGTCAAGATTATGTCTTTGAACTTAGCATTCAAGTTAACATCCTGGGAGTAAATCCGGTTTTCCTAAAGTTTAAAAATTACATTGAAAGCTAATTTTAGACCAGAAACATGCTTAGTGGCCCTGCTGTTGTCACAGAGTGAGCTTACCATCACCTGGACCCATCAGTGGGTTTTTTCCTGATAAAATCTGGTAGAGGAAGTAGCGGAAGCCTGGGCGATGGCAGCCCTGGAGGCCTCGCTCCTCCGCAGACCCGACGCCACGGCGCCCCCACGGTAGACTGGAGCAGGGTGGCGGGCTCCGGGCCCCAAGGGATGGAGGGGTCTAAAG…	ATTAGGCATAAAAAGAGTAATGCATTTTTTTATCCCAAAGACTTGAGATTTAAAAGTTGCGTGTATTTTTTAACTGAGGCGGCACCACAAGGAAGTCTATATTTCTCTTTTTTTTTCTACCAGATTTTTTTTTTTTTTTTTTTTTTTTTTTTTTTTTTTTTTTTTTTTTTTTTTTTTTTTTTTTTTTTTTTT
BHLHB9	X:76635887-76651465	BHLHB9L1	11:49510900-49510916	NA	NA
BLOC1S5	35:7860336-7998461	BLOC1S5L1	23:27162327-27162346	ATCTGACCTTCAGTTAGGAGAGCATATTTAAATAATTTCAATCATCTGACAGTAATTTATTATTATTTATTACTACCTTCAGCTGTCAAAAACTCTGTTCCTGCTATTTCCTAGGTGGAATGTTGGGTTAAAAATGAATAATTACATAAGCAAGTTAAAGGAAACATTAAAAGAGAACAAAACAATTTGATTTAAAAATATTTAGGTTAGGGGCGGAGCAGGCCGCGATGAGTGGCGGAGGGACGGAGA	TTCTTGGCTGCATGTTGAAAATGTGATTAAAGTTAATAGAGGAGAAAAAAAAAAATATTTAGGTTAGGTGCATTCAGTACAACAGTGAACATCAAAGAATAATATATTACCGTGGAATTAAGTATGACAGCTTCTCTGGACTCTGCACCATTTACTAGACTTGCCATTTAGAGTTCTCTTTCCTTTCATGGCAAGCTGTTTTAAGACAAAGATGATATGATAATAATAA
BLOC1S5	35:7860336-7998461	BLOC1S5L2	29:28383667-28383683	TTTTCTATGGTAAATTCCCTTACTGCAGGTAGACTAATTCCATCTTCCTTTGACTTAAACAGTTCCAGAGGTGATGCTTCCCAGTAGTCTCTGTGAAATCCAATCCCAGCAGGGAGAGATCTAGTTTCAAGACAGAAATCTAGTCACCGGAAATAGATAAGCTTCCAACAATTTAAAAAGGAAAATCAGGTTAAAAAATTTAATGAGGATCAAGGGTACGGAGTGACCTTGGAGAAATTCATTCAAGGCTTTTAGATCACAGACCAGTTATTCAAGGTGAAACCCGTTATTTTGTGAAAGAATTTGAAGAAAAACGTGGTCTTCGAGAAATGCGAGTTCTTGAAAATTTGAAGAATATGATCCATGAAACAAATGAACATACTCTTCCTAAATGTACAG…	TGGGGTTGGATGTGAAAAATGGAAAAAAAAGAAAAAAAGAAAAAAAAAAAAAAAAAAAAAAAAAAAAAAAAAAAAATTTAATGAGGTTTCATTCTTGAAATTAGTCACGTTCTTTTATTAAAAGAAAAAAAAAAAAACTCCAATGAGCCTTCTGTACCATAATAATAACTCAGATTTGCAAGGTGTGTTGCAGCTTAACAAAG
BMI1	2:10818232-10827825	BMI1L1	3:77919273-77919288	AACCTAACCTTATACCTCGTGGAGCTAGAAAAAGAACAACAAAGGGAGCCTAGGACCAGTAGAAGAAGGGAAATAATAAGGATTACAGCAGAAATAAATGATATAGAAATAAACAAACAAAAACCAGTAGAACAGATAATGAAACCAAGAGCTAGTTCTTTGAAAAAATTAATAAAATCGATAACTCTTAGCTAGACTTATCAAAAAGAAAAGAAAATTCTTAACAAAATACTAGCAAATCGAATCCAATAATACATTAAAAGAATCATCCAGGCGGAGGAGGAGGAGGCCGAGGCGGAGGAGGAGGAGGAGGCCGGGCTCGGGAGGCAGCATGAGCCGAGCGCGGCGGCCGCGGCTCCTCTCGGCTGCGCTCGTTGCCCATTGACAGCGGCGTCTGCA…	TTTATGATGTTGAGGTATGCTCCCTCTTTTCCTAGTTTGAGAGTTTTCATCAAGAATGGATGCTGTACTTTGTCAAATGTTTTTTCCACATCTACTGAGAAGATCATATAATTCTTATCCTTTCTCTTCTTAATGTAGTATATCATGTTGATTGATTTGAAATTATTGAACCATTTTTGCAACCCAGGAATAAATCCCACTTGATTGTGGTGGATGATTCTTTTATTTTTTTTATGGGAGAATGCAAAACATAATTTTTCTTCTGTTTTATTAAAACACATTTTAGCTGAAATACCCAGTAACGCTTAAGAAATTTTCAAAT
BMI1	2:10818232-10827825	BMI1L2	X:47108297-47108313	NA	NA
BNIP3	28:40037681-40050499	BNIP3L1	2:18462473-18462489	AACTTGCACATTGCACATAAAACACTCAGACTGAAACTCTGTAATACTCTTTTTTGCTCTTGACATTTATCTCCTTACGTGAGAGCTAGGTTCTAGATCTGTTATTCTTGAGAATATTACCATGTGATATGTCCATATCTATTGCTTTATACTAACGATGCTGTGCTGTAAGTGCTTATTTACATATGCACCTTTAAGATTTTTAAGGGTAGAGAATCCTTGCTTTTTCGTCTTAATCACAAATATTAAAGTCATCCGCTGTTTATCCGTCGCGCGTCCGGCGGCGCGTGTCAGTCGGTCCGGCCTCGGGCTGAGCTGCCCCGCGCCCCCGGCCCCGTCCTCGGCGCCCGCCCCGGCCCGGCCCGCCCCGGCCCGCCGCAGCGCCGTCCCTCGGACGCC…	AGTCTCCCTCTACTCCCACCTCAGCTCCCATATTCCCGGATGCCTAAATTTTGTTAAGAGTAGCTATGTAAATCTAATGATTCAACAATTCAACATTTCTTGAGTTCATTTTACACCTGACTTTAATATTTGTTTTTTTTTTTTTTTTTTTTTTTTTTTTTTTTTTTTTTTTTTTTTTTTTTTTTTTTTTTT
BNIP3L	25:31133512-31149750	BNIP3LL1	16:11328354-11328367	NA	NA
BOD1	4:38888096-38895539	BOD1L1	3:3460201-3460219	TTTTTTTTAAGGACAAAAAAAAAAAACAGCTTTTTTTTTTTCCTGTATAGACGTATAGATGAATATCTGAACCATAAAAAAGATAAAAGTGGGGAGCCGGCTTCCCCTGCCGCCGCCCCCGCCCCCT	TATGAATCTTGGGTGTGTTTATTTTATTCTCATGTTTATGTTTTTTAGAAAAGTTGAATGATCAATAAATGGCTTAAGTTTTGTAAAAAAAAAAAAAAAAAGATAAAAGTGACATTAAAGACGACGTGTATGCAAATGTTTCATGGTCTAACATAGAACTGTAAGACCCATGAAGAAGTCCTAGTAACAGAGAGAATGTCAACAAAGCTTAGAATGCTTGAATCCGTTTACT
BOD1	4:38888096-38895539	BOD1L2	5:56873136-56873190	NA	NA
BOLA3	17:48941730-48952327	BOLA3L1	13:52139262-52139276	AGCTCCCCCTCAGTCTGCGAGGCAAACATCCGCTGGGCACAGTGGAGAACAGTTTTTCTTTTTAATGAATAGATGTTGAGTTCTGTCAAATGCCTTTTCTGCATCTTATTCAGATGATTATATGATTTTTATCTTTGCATCAAAAGTTTTATATCAGCATAAATGTTAGTCTAAATATTTAT	GTTCCTTTCATAAATTTTTTTATTATTAAAAAAAAAAAAAAAAAAAAAAGAAAGAAAAACTGTCAACAAAGTGGGTTTATAGAGACCATAAACACAATAGAGGCCATGTAAAAAAACCAAACAACAAAAACAAAAACCCAGTGCTAAAATCATACTCAGTGGTGAAGAACTAAGAGTTTTTAGCTCTAGATCAACAAGCAGAAAGACAAGTATGTTCACTCTCAATACTTTTATTC
BRCC3	X:123081262-123143509	BRCC3L1	6:25882787-25882802	NA	NA
BRCC3	X:123081262-123143509	BRCC3L2	13:26699992-26700006	ACTCAACAAATTTGTTTACTGAGATTCTGCTATATTGCATTAGGTAGTCCAAACATAATGCAGAAGCAATCATCTCACTTAAGACTCCATTCAGGACGCGAGCGGGGTCGGACCAAGATGGCGGGGCAGGTGGTGCAGGCGG	TTGTATTTTGACCTATACCGGGGCATCTCTGTGTCAGAGGGAATTCGGGATCTCACTTAAGACTCCATTCAGCTGGAAAATAATAGGGCCTGGCT
BRCC3	X:123081262-123143509	BRCC3L3	20:18968618-18968632	CCATCTTGGTCCGACCCCGCTCGCGTCCGCCTCGGCCCGCCCGGGCCACAAAACATTTTAAAAATAATGATTCCCTGGCCCCACCGAAGGAGACCAATTTGGTTGCTGTGGGGGATGAGTTTTTTTATTTTTTTAATT	TTCTAGAGCCTAATACTGGAAGCAGGGAAATGGGATTTATGCCAAGTCAGTGGTTCTCACCTCTGGCTGCACATTAGAAACCTTCACAAAACATTTTTTTTTTTTTTTTTTTTGTTTTTAAT
BRK1	20:8220109-8231337	BRK1L1	5:45227392-45227406	AATCAGCCCTCTAAGTTCTTTTCAGCTGTATCCTACATGTTTTTGATAGGTACGAGTTTATTATTCAATGGAAAACAATTTTCAGAGGCGGCAGCCATGGCGGGCCAAGAGGATCCGGGGCAGCGGGAGAT	AAAAAAAAAAAAAAAAAAAAAAAAAAAAAAGAAAACAATTTTCAAAATTTGTTATGTTTTACAATTACATGGGGATGTTCTGTCTATCTTTTTATTATTTATTTATAGTTTGATCACATTGTAAGGAGAAAACACTCTTTGTTATCTCAGTCCTTTAAAA
BRK1	20:8220109-8231337	BRK1L2	6:56030329-56030345	CCCACGTCGGCCTGTGTTCCATAAAGCAACTTCCCAGCAGCAGCATGGCATAGTTCTAGGTGAGGGTCTCACCTTTTGTCACCCGTGCTTCAATGTACTCTATTCTCCGCTCGAGGGCTGTCAATTTCTCGTTTAGTGTTGCAAGTCTTGAACGACAAGACATATCGAAAGAGTTGAGAAAGTCCGCGATCTTCTTGATGCTGCTGGTGATGACCTCAATGTATTCCCGGTTCGCCCAGTCCTGGTGAATCTCCCGCTGCACCGGATCCTCTTGGCCCGCCATGGCTGCCGCCTCCATAGAAGTACTTTTTGATTCAGATTGATGTCCTAGTCTTCTTTTCATTTGGACCATTCACAAGTCAACTGTGATTTATTTTAATGGCAAACAGTAGCTGCAAC…	AGTCTTCTTCTTCAGTTCCCACCCATTCTATTTAATTCTGAAGTTTGAAGGCGTCTTTCAGGCTTATCTTTACTCTTAAGTCATGGAAGTACTGTTTGTTGTAGATTGATGTCTTGGTATTCTTCTTCAGTTCGAAACCATTCTATTTAA
BRK1	20:8220109-8231337	BRK1L3	8:23010693-23010708	CACCCAGTCCTGGTCAACCTCCCCCTGCACCGCATCCTCTTGGCCCGCCATGGCTGCCGCCTGAAGCTCCCCTGTGGTTATTGATGCAGACATGCTACAGCCCATTTTCCTTTGATAGTTTAAACTCACCTTTTATAGAGAACTGATCAGTGTTGTTGTAGATCCTGTTTTCCCAACAGATTCTGCTTAGTAAAGAAGAAAGCTACTGTGA	ATTAGACATAAATGCGAGAAGGTGATATTTGCAAAGTTATTAAGCATGGTCTCTGAAAGAAACTATTGGAGTGAGACTCCCTAACCCTCACATTTCTACAACCTTTGACATCATTCTCATAAATCCCCTGTGGTTCTTTTTTTTTTTTTTTTTTTTTTTTTTTTTTTTTTTTTTTTTTTGGTTTGGGGTTTTTGGGAATTATGAGAGGCAA
BRK1	20:8220109-8231337	BRK1L4	8:35429616-35429631	GGGTATTTCAAGGGTTACTTCACAGTAGCTTTCTTCTTTACTAAGCAGAATCTGTTGGGAAAACAGGATCACAACAACACTGATCAGTTCTCTATAAAAGGTGAGTTTAAACTATCAAATGAAAATGGGCTGTATCAAGTCTGCATCAAGAACCACAGGGGAGCTTCAGGCGGCAGCCATGGCGGGCCAAGAGGATCCGGGGCAGCGGGGGGATCACCA	AGCATGGTCTCTGAAAGAAACTCTTGGAGTGAGACTCCCTAACCCTCACTTTTCTACAACCTTTGACATCTTTCTCATAAATCCCCTGTGGTTCTTTTTTTTTTTTTTTTTTTTTTTTTTTTTTTTTTTAATTTTTGGGTTTTTTTAGAG
BRK1	20:8220109-8231337	BRK1L5	9:47360960-47360974	CTCTTGGCCCGCCATGGCTGCCGCCTGAAGAGAGCCTAAATGTGTTTTCATATTACTAACTTGAGCATAGAATTAAATGTGTTTTCAAGTAATGTATAAGTAGCTACTGGAAACTAATGATGCAGACTTGCTATTT	ATAGTTTAAAATTCTGAATAAACCGCTTCTAAATTCAAATTTCAAAATTGAAATGGATACTATATAAAAATTATTAATTTGAGCATAGAATTAAATGTGTTTTCTTTTTTTTTTTTTTTTTTTTTTTTTTTTTTTTTTTT
BRK1	20:8220109-8231337	BRK1L6	21:22878140-22879262	NA	NA
BRK1	20:8220109-8231337	BRK1L7	27:3846311-3846327	TCCTGGTGAATCTCCCGCTGCACCGGATCCTCTTGGCCCGCCATGGCTGCCGCCTGAAGACCTATTTTTTAAACTTTAAAAAAAGATTTATTTGTTTGTTTATTTATTTATTTATTTATTTATTTATTTGAGAGAGAGAGAGCCCAAGAGTGTGTGAATGGGAGAGGGGGAGGAGCAGAGGGAGAGAGAATCCCAAGCAGACTCCTCACTGAGCCTAACACGGGGCTTGATTCCCATGACCCTGAGGTCATGACT	ATTAATATTATGTTTGCCAGGTGGCAATTTTCTAAATCCATCATTCTTTTTAGGTTTTTCAGTTGGCATTGTAATATAAGGAATTGCTTTGCTTTCCTATTTATTTTATTTTTTAAACTTTATTTTTTTTTTTTTTTTTTTTTTTTTTTTTTTTTTTTTTTTTTTTTTTTGTTTTTTTTT
BRK1	20:8220109-8231337	BRK1L8	38:17840681-17840695	CCCAGCAGCAGCATGGCATAGTTCTAGGTGAGGGTCTCACCTTTTGTCACCCATGCTTCAATGTACTCTATTCTCCGCTCGAGGGCTGTCAATTTCTCGTTTAGTGTTGCAAGTCTTGAACGACAAGACATATCGAAAGAGTTGAGAAAGTCCGCGATCTTCTTGATGCTGCTGGTGATGACCTCAATGTATTCCCGGTTCGCCCAGTCCTGGTGAATCTCCCGCTGCACCGGATCCTCTTGGCCCGCCATGGCTGCCGCCTGAAGAGAGCCACTGCGCAGGCCTCATCCACAGTTTCCACGCGGGGACGCTGAGGCCCCGAGAGATGGAATAACATGCCCAGTGGCAGGGTGCAAACCGCTGTGACTGACTGACCCCAGAGCCACACTTTCCCTGTTT…	AAAAAAAAAAAAAAAAAAAAGAAACTGTGGATGACAGCAGCACAGCCAGTGCAGCGCCGTGGTGAGCATGGCTTCGAACTCCATCTCCAGGCCTGTCTGCCAGCCCTGGGTTCAGGTCTCGGCCTAGATGTCACCTTCCAAGAGACACATTCCCCCCACCCTAAGGAGTCCCTGGCGTTGTCGTGACTATAGCGCCTTGTCCATCCTTCCCGGCCCGTCCTACAATCTGGAATTTTATATTGGTGTAC
BRK1	20:8220109-8231337	BRK1L9	X:54952519-54952536	CGCCATGGCTGCCGCCTGAAGAGAGCCACTGCCTCAAGAGGGATTGTTTGTTCTTCAGGTCCCAATTCTAACTGGTAATGAAGAACTGATTGGTGAAGTGGAAATTTGAACGGCAACCTAAAAAGCTCAGAGTTTGCCAGAGCATAAGCTGAACACAGCAAGGCATTTTGCCCTAGAACTTAAAAAGGCAGACCTCAAAGGGCTTAGAGAAAAG	GCCTAAAGGCAGAACATTTAGAAATTATCTGCTTGTATTGCTGACAATACTACCCCTCTGAAAGTAAAGAAATCAAGAGGGATTGTTTTTTTTTTTTTTTTTTTTTTTTTTTTTTTTTTTTTTTATTTAAATTTGGG
BTF3L4	15:9239933-9262103	BTF3L4L1	12:937468-937480	NA	NA
BTRC	28:13988408-14173223	BTRCL1	27:34392994-34393086	NA	NA
BTRC	28:13988408-14173223	BTRCL2	28:32464514-32464533	AAAGCAAATGCGAATCCCATGTTGTTTCACCAAGAAAATAAACTACATGCAGTGGATAAGCTGAGGTGCATCGGCAATCAACTTAATTTCCATGCACCCCAGCTTCACCAGTGCATGTAGTTTATTTTCTAGTTGAAACAACAGTGGAAGAGCATTTGCTTTAGTTAGGATAGTCTCTAAGGAGCTGACATCTGAACTGGCTTTGACGATAGAGCATGTGACTCCTCAGGGTTGTAAGTTTGAGGCCCATGTGTGATGTCGGGATTACTTAAAAATAAAATCATAAACTTGAGCGCTTTTTCCTGCAGCACCGCCTCGGCCGGGTCCATAATCACCGGGGGCCGCTGGGTCTGCACTCCGCCGGGGCCGCCCCCTTGGTGCCAGGCCGCAGCCAACGCA…	CTCCTCTCCTTTCCTCTGCACCTGTTTTTCCTTATTTGGTTCCAGACAAAGATGACTTATAAATATATTTAGTGTTTTGCCAGAAAAAAAAAAAAAAAGAAAATCAAATACTTCATAATGGAACCCAACGAAGGGCGAAGAACTTCACTTAGAAACAAAAAGCTTTTCGTTTTCCTTATTATCTGTGATGATAAGTGATGTCCTTGTAACAATAGTCTCATTTGTTTTTCCCCTAATAATAACTATTACTATGTTTGTTAGTAAAAAAAATACCAGCAAAGACAATTAAAG
BUB1	17:35208989-35252296	BUB1L1	27:13273237-13273279	NA	NA
C12H6orf203	12:64278569-64293999	C12H6orf203L1	19:16597653-16597669	NA	NA
C15H1orf50	15:595391-603176	C15H1orf50L1	15:5868849-5868913	NA	NA
C17H2orf68	17:39472158-39477774	C17H2orf68L1	27:31514205-31514222	CAGATATTTTTCTGTTTTTAAATTAGCATGTTAGGAAACATAACTAACTGCCTACAGTATCCATAGTTCACCTTTTGTTAGAATATGTAGTTTTAACTCTAAAAGTTTCAACTGGAAAAATACATTGATCAGACGTCTTTAAGCAATAATGTAGTAAAATTAAAGTCTTACATAACTGAAGTTTGAACTTCCCCAATTCTAAGACCATTTAAACTTCAATTATTTCTTCAAGAAATCTTTCTAAAATGTATTTGAGACTCCATTGCCTTTCAAAACTGAGTATATTGAGGAAGTCCGGCGAGGGGCGGCGCGGATTTCCCCCGGCGGGACCGCGGCCGTTGGGGCCGTGGAGTCGGCGGCGGCTCCGAGCGCAGGGCTCCAGATGGAAGCAGCTCCAGA…	ATGGATTCTGAAAGTATTATTGTGTAACTGCATAGGGTACTAATCCAGGTTAACTAAGATCTAGGCATTTTTAAATGATTTGGTTATGTTCAATATACTCAGTTTTTTTTTTTTTTTTTTTTTTTTTTTTTTTTTTTTTTTTTTTTTTTTTTTTTTTTTTTT
C18H11orf98	18:53992413-53995549	C18H11orf98L1	24:19079722-19079734	NA	NA
C21H11orf58	21:39397196-39410143	C21H11orf58L1	3:32924011-32924028	NA	NA
C21H11orf58	21:39397196-39410143	C21H11orf58L2	15:29034956-29034968	TCTCCATCATGATCTTCTACCTCACTGAAGCCAAGTCCACAATGTCGTCGATATCTTCCTGATAATTTACTGTCCATACTTTGCTGATATTGAGACTCCAGTTCTTCATTAATTTTCTTGTCTTCTTCCCCTGTTCGGAAGTGAGATGTTGATTTGTGGTCTCCTATAACAAGACGGCCAGTATGTTCTTTCTTTCCTGCACCCATAAGTCTCAAGAACTTCTGTTTTCTTTCTTCATTACCTAAGTCTGCTGCTTCCCAATTGCTAGATCCAAGATCGTCGTCTGGGGAGGCCGAACGCTTCACCCCGTGCGGATGGGACTCCCTGGCAGCGCTCATCGTTGCTGGGACCCCCGGCGGGAAACGCCGAACCCCCTCGCAGTTCTCTCTTCAGCAGCGG…	AAATTAAAAGTAAAAAAAGAAAAAAAAATAATGAAAGAAGAGAAAATTAGAAAAAAATAATAAAAGAAAAAAAAAAAAAAAAAAAAAAAAAAAAAAAGAAATGATTTCTCTTTTGTTTTTATTTCTGAGATGATTTTGCCTTCTTCTATTTCTTTCTAATTGACTCTCATTTCATATATTCCTGGTATTTGTCCACTTTTATTTCCAG
C23H3orf33	23:49485250-49504244	C23H3orf33L1	20:49732097-49732114	NA	NA
C25H2orf72	25:42982661-42994551	C25H2orf72L1	19:19424690-19424709	ATGGGACTGACATACTTTGGGACCCAGGTTGGCTTTTTCGACACGTGGCGAAGATAAGCATGAATTTTAGGAATAATCTAGTTGGTATTTTTTAGCAGACAGAAGAGTTAGGTGCTGGAAGGGATGACCTTGGTGGTAGGTCTCTTCCCCAAGGACTCTCAGAAGGCATGAAGATTGGGGTGGGCCAGGCAAGTGCCTCCAGTCAAGTCACAGTCAGGGCTGGTGCATATTAATCCTTCTAACATGGCAGTAGTTGTGCTGCTTCTGACTTGGATCAATAATTCCTTGTATGTAATAAAACCGAACAGTACATCATTGCTGTCAAATAAAAAAAAATGCTTGTTATAAAATGAAACAAAGGAATGTGTGCCCAGTATAATATGAATATTTTTATGTCTA…	TTCGCCTTATAAATATTCATATTATGCTGGGCATACATTCCTTTGTTTCATTTTATAACGAGCATTTAAACATGAATTGAAATACCCAGATTACTGTGAAG
C25H4orf27	25:20622781-20645459	C25H4orf27L1	36:10253852-10253864	NA	NA
C26H12orf43	26:16826481-16835832	C26H12orf43L1	5:12733041-12733055	NA	NA
C27H12orf4	27:40341944-40388424	C27H12orf4L1	14:13801729-13801745	NA	NA
C27H12orf57	27:38101705-38103553	C27H12orf57L1	32:1299310-1299326	GATGGCAGAAAAAAAAGAAAAAAGGATGGGGGATGGGAAGAGAATTTAGACTGAGCTTGGGTTGGGGTTCTTATGTCCCTTGTTTGGCCTATTGGCATGACTGTCCCCTCAACTGTTAGGTTGCTGGCTCTTTCTCAGATTTGTAATCTGTAATCCAGTAGTAAGAACTAAATTAGTAGTGTTACAGCTCTTTTAGAATTTGTCTAGCAGGTTTTCCGGTCCTC	CTTGACATTCCGGAGGATAATAAACGTGCCTGTGACAGCCAAAAAAAAAAAAAAAAAAAAGAACTAAATTAGTCTGTTATGTGGACTTCAAAAATGTCTTTTGCCATTACCCATTATACACATGTAACTTTTAAAAATCACCTATTGGCTGACG
C35H6orf62	35:22725186-22741526	C35H6orf62L1	21:8919625-8919725	NA	NA
C37H2orf69	37:9092569-9106741	C37H2orf69L1	16:3125494-3125510	GGCGGTGGCGGCGGCGACCGCAGGAGCCTCCCGTAGGCAGGACTTAAGGGTGATATGATCACTGGTGATTCTGTAAGAACAAAAACAACAACATACAAA	AGGTCCTCTATTGTCTGACATCACCATTCACCATTCACCCTTTACATTAATTAAAACAGATATGATAATTTACACACAAACAAAAACTATAGATTTTTCAAACACTGGTCAAATTGCATTAAATATTCAGATATGCTTACTCAACGAGTATAATGAGGGTTTGCTCCATAGGAAGAACTTTTTTTTTTTTTTTTTTTTTTAGACAAAAAAAGGAAAAACTTTTTTTTTAAAAATTTTTTTCAAAA
C3H15orf40	3:54788092-54793197	C3H15orf40L1	1:66026123-66026137	NA	NA
C4BPA	7:6239036-6268934	C4BPAL1	19:32420033-32420041	NA	NA
C7H18orf21	7:54202934-54210601	C7H18orf21L1	32:3355088-3355104	TGATGTGGGACTCTGTCCTGGGTCTCCAGGATCATGCCCTGGGCCGAAACTGGCCCTAAACCACTGAGCCACCAGGGCTGCCCCATTTATAATTTATTTTTGTGTTTGGTGTTAAAAAAACGTCTGGCTTCGTCCTTTTGCAAGTTATAATACAAAGTCGTAATAATCAAAACAGTGTGGTACTGGCACAAAAATAGACACAGAGGGCTTCCGGAGGTTGCTCGTGTCGTGGGGGCGGCGGTGACAATGAGGCAGAAGCACTACC	AAAAAAAAAAAAAAAAAAAAAAAAAAAAAATAGACACAGATAAATAGAACCAGATAGAAAACCTAAAAATGAGCCTACAACTGTATAATCAGTTAATCTTCAACAAATGGTGTTGGGAAAATTGGACCAGCAACATGCAAAAGAATGAAACTTTTTTTTTCTGCCTTCTTTTGGATTAATTGAACATTTTTCATGATTCCATTTATATACTCTCGGCTTAAGGCTTTAAATCTTTTGTTTTATTATTTTAGTTTTGCTTTAGGGTTTATTGTATACATCTTAAACT
C7H1orf21	7:17710731-17851232	C7H1orf21L1	25:571033-571050	NA	NA
C8H14orf2	8:71600422-71605615	C8H14orf2L1	7:54767804-54767824	NA	NA
C8H14orf2	8:71600422-71605615	C8H14orf2L2	17:903293-903307	TACAGGGCCGCCCACGCGGCTCCGGGGGCTCTGCAGCCCGGCTGTGCGCCCGCCCCGCGGCGTGTTTAGGCTGGAGCCTCCGCCTTGCTGAAAACAAACTCCTAATTTTCCTTCCAGGCTCGTTGTTACGATGAAGTCCGAGTCTTTGTTATCACAGCTCGAATGTATTTGAAAAGTACGGGAGGGGGTGGCGGTGGTGTCGCGGCGGCCTGAGCCGGGGGTCGCGCCGAGATGCTTCAAAACCTTGTTAAAAGTGTTTGGGTCCCCATGAAGCCCTACTATACCCAAGCTTACCAGGAGATTTGGTTAGGAATGGGGTTGATGAGTCTCATCGTTTATAAAATCCGGAGTGCTGATAAAAGA	AAACGGTTTTGGGTTTCGTGTCCGCTGAGGCGGGAATAAACTTATGTAAATGTAAAAAAAAAAAAAAAAAAGTACGGGAGGAATATGTCAGAAGTGTCCGGGTCCAGCGCGTCCTTGCAGGCTGGTGACGGGCCCGTCCCTCCCACTGCTAACTGCTCTTCACGGCCACACACAGCCGTCGCGTCACAGGAGTGGCTGGGGTGCTGCAGTCAGGGAGG
C9H9orf16	9:55319943-55323429	C9H9orf16L1	14:37913600-37913607	NA	NA
C9H9orf16	9:55319943-55323429	C9H9orf16L2	17:21903829-21903851	CCAGTTGGACTCAAGCAGCTCCTGGAGGTGGGCATGGAGGTGGTCATTCTTCTCCTCTAGGTGGTCTAGACAGGAGTTGATCTGGTCCAACATGGAGTTGATGGCAGCATATTCTGCTTCCCCGAAGCCGTCGTCCTCGCCTTCCGCGCCCGCCTCCACCGGCAAGGCCAGGTCCCCGTTGGGGCCCGACTTTGTGGGCTCCGGCGCCGCGAGGGTCCCGCGGACAGCCGGCGCTGGTGGAAGGTGGAGGCGCGGGATGGAACGCGGCGCCGGAAGAGCTCTTTTAAAATTTTTTTTAAGAAAGATTTTTATTTATTTATTTATCAGAGAGAGAGAGAGATAGAGAGATAGAGAGAGAGCAAGCAAATGTTTACAAGCAGAGGGAACTGCAGGCAAAGG…	TAAAAGATTAATAACAAAAACTAATGAGAAAAAGGAACTGTAACACATTCACATAAAAGTTATGCAAATGTGGTCTCTCTCTCTCAAATACCTTACCATACTGCACTCACCCTACTGCTTGTAATGATGTTAGATGATAAAATACCTACATGATGAGATGAAGTGAGGTGAACAAGGTAGGCATCATGAGGTAGCATTAAGCTACTACTGATCTAACAACATGTCAAGAGGAGGATCACCTGCTTCTGGACC
C9H9orf78	9:54009543-54016154	C9H9orf78L1	7:50859008-50859026	AGCGCCGGCCCCGCGGTCCCGCCGCCGCGCCCCAGTTCCCGGGCCGGGGCTAAACTGTTTCTTTTAATATCACTGTGAGCATCATGTGAACCAAAATTATCTTCTTTATATGGCCCATAGTTGGTAGCAATTGTGTCCACCAGGTAGGCACTTACTCTTTACTTTTTTAATATATATATATATTGAGAGAG	AAAAAAAAAAAAAAAAAAAAAAAAAAAAAATAAAAGAAACAGTTTACTTTCATATAGTACAACACAGAGTATTATTTTGAGCCTTAAAACCAACAATGGTTTTGTGAAACTGTGATTCTAGAACTTTAAAGACATTTTAATCTATCTACTCCCTTCAAGTAAATGCCTAATAAAATATCATGACTGCTACCCTGCCTGCCTACCCATCTCTGTCATCTGTACCTTCATGCCCT
CAB39	25:42752798-42801257	CAB39L1	3:73256422-73256437	NA	NA
CACUL1	28:29007685-29093032	CACUL1L1	8:11968656-11968725	NA	NA
CACYBP	7:24372599-24384084	CACYBPL1	8:55204409-55204424	NA	NA
CAP1	15:2886661-2913975	CAP1L1	2:49980685-49980705	GAGGTTCTACTGTGAGTTTTGTTTTCAATCTGCAAGAGTCATGAGTTAGAACCCTGTGTTGGGCTCTGCCCTGATCATGGAGTCTGCTTGAGATTCCCTCCCTCTGCTTGAGCTTTTGCGCTCTCTCTCTCCCTGTTGTAAATAAATAAAATCTTAAAAAAGGGAGAGCGGCTGCTCGCAGTCGGGAGGTGAGGCGGAACTCTGAG	TTAAAGTTATACAGAAAATAGAATAAAATTAATACCAAAAAAAAAAATCTTAAAAAAAAATGTGACAGATGGTAGTTACACTCGTAGTTAACATAGCATAAAGTATAAACTTGTCCAATCGCTAGGTTGTACTCATGAAAC
CAPNS1	1:116549608-116558928	CAPNS1L1	1:100498103-100498120	NA	NA
CAPNS1	1:116549608-116558928	CAPNS1L2	12:64430290-64430565	NA	NA
CAPNS1	1:116549608-116558928	CAPNS1L3	17:32438491-32438506	ATGGAGTCTGCTTGAGGATTCTCAGTCTCCCTCTCCCTCTACCCCTCACCCCACTTGCTTTCTCTCTCTCTTTCTCTAAAAATAAATAAATAGGAACATGGCTGCGATTTAAAATTCAGGTGAACATCCAGGAGTGGCTGCAGCTGACGATGTATTCCTGAATG	CCCCCCTACAACAAAACACAACCACCACCACCAAAAATAAATAAAAAAAACAATAAAAAAATAAAATACCAATAGTATTACAGTATACATACTTTTCTTTAAGGTATTTTTTTATTAAATGTTTCCTAGTTTTACTTTCCCATGTCAAAGT
CAPNS1	1:116549608-116558928	CAPNS1L4	28:322523-323214	NA	NA
CAPRIN1	18:33695371-33733688	CAPRIN1L1	8:74277836-74277845	NA	NA
CAPRIN1	18:33695371-33733688	CAPRIN1L2	14:19438426-19438593	NA	NA
CAPZA1	17:62900062-62948164	CAPZA1L1	4:82604652-82604668	CAATACATGCAATAATGGTCTGTTGCCCATCCATAGTTTTAGCATAAACAGTACAGAAGCCGTTGGAATAATGATCTTTCACATAGGCCCTTAAAGCATTGTCACAGGATTCTCTTCAAGACTTCAGACCTCCATCTACGTCCTCTGGCTGGGGGTCACTTGCTTCTTTCCGTAAATGGTCAAACTTAAAGGAAATTTTGTTTCTTGGATCTAAAAATCTGCTATTACCCAGGTCACCGTGTTCTGTAATTAAGACCTGATCTTCATATCCTTCTATCTTCACAGGCATGAACTGATCCATGTTATACTGGGCAAATGCATGTGCTGCCCCTTCCCTGAGGAGATTGTCATTATTAAGTAGTAGCCGGACATCACTGAACACTTCATTAAATTCTCCTG…	GTAAAACTTGTTCCAAATTACTCCTCAGTCCTGCCTGCCAAGAGCTCAAATGTAACTGTGATATAGCAACCCTTCCCAGGTGTATTGGCAGGTAAATGTGTGATCTCAGAATACACAGGTGACATAGATATGATATGACAACTGGTAATGGTAGATTCATTTACATTGTTTACACTTCTATGACCAGGCCTTAAGGGAAGGTCAGTTTTTAAAAAACCAAGTAGTGTCTTCCTACCTATCTCCAAATAAATGTCAAAAAAGAAAAAAAAAAGTGGTCTGTTTTTTAAATTCAAAATATTATGTATAACATGGACATATCAAGCTGAAGTTTCCTGCTATCATTGGTCTTATTTGATTGGGTTATATTGACCATGATTTTTATGAAGTGGATGCTTGAAT…
CARD19	1:98582373-98595098	CARD19L1	35:12535114-12535127	NA	NA
CARS2	22:58891826-58946112	CARS2L1	10:64805957-64805973	NA	NA
CASP3	16:45920074-45940507	CASP3L1	9:45132177-45132194	NA	NA
CBX1	9:24363566-24369060	CBX1L1	11:45224673-45224689	TCTCTCTCTCTGTGTGACTATCATAAATAAATAAAAATTAAAAAAAAAGACAAATAAACTAAAGATTATAAATATGGACTCAGAAGTAACAACTGATAAAAAGGAGAACAGAAAAAAAATCTGTTTTTACATAGGATCGTCTTGATACATCTATAATTATTCCTATTTATAATTAGCCACTAATTTTAATACTGAAAAGTTATTACTAGTTTTATCTGAAAATGAGTATTCTCTTTAAAATGTTGCATTAGGTTGCTTTTCTGGGCGCCACTCCCCCGGCCGGCCCGACGCGACGCGCCATTAGCGCGGCACCGATTCCTCTCGGGCTCTTGGGCGCTGCTCTGAGCAGCGTCACCCTTTAGACCAGAAAGCTGGCGGGCACTATGGGGAAGAAACAAA…	ATGTACTGATTCTGTATTAGACAGGAGAAAGAAGGATTTCTTAGAATATAATATGAATTATTAAATTTATTTAGTTGAGATTAATGCAACATTTTATTTTTTTTTTTTTTTTTTTTTTTTTTTTTTTTTTTTTTTTTTATAAA
CBX1	9:24363566-24369060	CBX1L2	15:38851242-38851258	NA	NA
CBX1	9:24363566-24369060	CBX1L3	17:40289643-40289724	CCTGCCCAGCAGCCCCTTCTGCAGGAACCCACCTTGTTCTGCCTCTGCTCCTGCTGGACCTCAGGTATCAATCATTATACTCTTAAGTTGGGTTAAATTCCTTGGCACAGTGAGCATCTTTGGTCAACATAAAACCCCTCTCTTGGCCGCAGACCCGGGACCCGGAGCAGCTCGGAGGCGGTGAATAATAGCTCTTCAAGTCTGCAATAAAAA	AGTTTTATATTCCTTTAAAAAAAAAAAACCCCTCTCTTGTGTTCTTTACTCTCTCTCTTTTTTTTTTTTAATTTTTTATTTATTTATGATAGTCACAGAGAGAGAGAGAGAGAGAGAGGCAGAGACAGAAGCAGGCTCCATGCACCGGGAGCCCGATGTGGGATTCGATCCCGGGTCTCCAGGA
CBX3	14:39510694-39520796	CBX3L1	2:43353900-43353918	TTTCTTTTGCATTTCTTTAATAGCAAGGCTGAACTTTTGAAATATATTTTTGCCATTGGAGTCTCCTCACTGAAATGACTCTTAATGCCATCTCTTAATGATATTTTTCTTTCAGATTGTTAGTGTTTCTTACTAATTTATATAGGCTCTTTAGAAATTAAAGGTATCGAGACGCCGCAGACCCGGGCACCGGAGCAGCTCGGAGGAGGAGAATAATAG	TAAAATTATGAAAGAAAAGTGAAGAGATAATTAAATGTGGTAATTTTTAAAAAACTTTTATGGAAAATCACTAAAACATTAAAAGTCAAGTAACAAATTAGAGAAAATATTTGCAAAAAGATCGATACCTTTAATTTCTTTTTTTTTTTTTTGAATATAAAACTATTTATTGACCACT
CBX3	14:39510694-39520796	CBX3L2	5:75529650-75529667	NA	NA
CBX3	14:39510694-39520796	CBX3L3	17:34674936-34674953	CCCTTCTGCAGGAACCCACCTTGTTCTGCCTCTGCTCCTGCTGGACCTCAGGTATCAATCATTATACTCTTAAGTTGGGTTAAATTCCTTGGCACAGTGAGCATCTTTGGTCAACATAAAACCCCTCTCTTGGCCGCAGACCCGGGACCCAGAGCAGCTCGGAGGCGGTGAATAATAGCTCTTC	TATATTGTTTACTTTATTGTAAATACTGGTAAACAGTGGTCAATAAATAGTTTTATATTCCTTTAAAAAAAAAAAAACCCTCTCTTGTGTTCTTTACTCTCTCTCTTTTTTTTTTTTAATTTTTTATTTTT
CBX3	14:39510694-39520796	CBX3L4	20:47425072-47425088	TCTGAAGATTACTGAGAAAATACTTAGTATATTCACACTAAATGAAGATGACTGGTTATAAAGTGAAAAGGGGAACCTAAGATATAACCTGAACAAAAATAGAGAAGACAGGAAGACCCAAGGAGAGAACTGCTTTAAAATGTGTACACCTGCCCCCTCGGATGTGGCTGGAGCTTGAGGCGCGCAGGGCCGGAGACGCCGCAGACCCGGG	ATACAATATGAAGGCCCAGAGATCCTGGCTTCCTCCATTCAATATTTTTATTTTTTTCCCCAGGTGTACACATTTTTTTTTTTTTAAAGGAATATAAAACTATTTATTGACC
CBX3	14:39510694-39520796	CBX3L5	22:6686187-6686207	NA	NA
CCDC113	2:58332444-58361265	CCDC113L1	8:19753001-19758109	AAACATTTTTCTTATGTGTTACGACAGAAAATGGGTAACAATCAGACATCAGCACTTCAGAGTTAGCCCAGTATTCAGTCCTGAGGATTCCCTCAGTCACAATATATCATTGCATGAACTCCCAACATTCTTGATCTCTTTCTTCCCCTTTTACATGGCAGCATCTAATATAGTCTGCATTTTATGCTTCTCACCTTTTCTAGATCCTACCACTGTAATTTCCATGAAGGCAGGAATCTTCATCTGTTCCAATTGGTTTTGTTCACTGATGTACTTAAGATTCTACAATAGAATTGAATTTCAATAGAATTGAAAGAGAATTGAAAGAGAAACCCTACAAGTAGAGGAGGACCGGGCCAAGGCTGAGGCTTTGAACAAGAAGCTCCGCAAGCAGCTGGC…	AACTTTTCTGAACCCTACCACTGGAATTTCCATGAAGGCAGGAATCTTCATCTGGTCCAATTGGTTTTGTTCACTGATGTACTTAAGATTCTACAATAGTTCCTAGCATATAATACATACTCAGTTCACCTCTTTTGAATGAGTGAATATG
CCNA2	19:18317866-18324592	CCNA2L1	32:35206480-35206497	TTATTATTGATTTTCAAAACCTGGAAATGATTATGGTACTCTATATTTAGCAGTATACTTTTCTAAGTTATGTTAAAATAATAATGTATTTTTGGCTATTTTTTCTTGACTATGGTTTTAAAGTTAAACCTTAACATTGAAGTAGATCTTTGTAAATCAGATTGAAGAAAGGTTCTAAATTTAAACAATCCGAATAGTCGCGGGATACTTGAACTGCACGAACAGCCGCCGCTCCGGCGGGCTGCTCGCTACATCTCGGGGGCGTCTTGAGCCCTCCACGCCCGGCAGTTCCTGCCTGAGCCTTTCGCAACGTCCTCGGAGCTGCGCGATCCCGAGCGAGCAGGCTGGCCCGGACTGCCGCGGGCGGCTGCGGCTGGAGCGTTTCTCGGCGGGGTCGGC…	TTTTTTAAAAAAAAAAAAAAAAAAAAAAAAAAAAAATAAATAAATAAATTTAAACAATCCAAATTTGAGATACTCAGAAAGAAATATCTCCATTTTTTTGTGTATTGGTTATATTAAGGGTTTTAACTGGTTATATTAAGGACTTTAATGAGAATTCATTGAAATAATATATCCAAAAAACAGTTAACAGAAGTCTAATATATTTTAGT
CCND2	27:40563306-40593362	CCND2L1	13:25003999-25004011	NA	NA
CCNG1	4:47800697-47808259	CCNG1L1	2:12108420-12108436	TAACAGATCCGATAGGCCCACGAGGCGAGGGGACTCGCGGGTAAGAGGGGAGAGGCCCGGGGAGGGGGAGCCGTCCTGGGCGGAGGTCTCCGCAGCGCCGCCCGGACGACACTGCCCACCACAGGGTCAGCTCGGAGCCCGAAGAGGACATTTTGAAGAGAGAAATGAATTAAATGTATGAGGGCCAGTGTGAAATTACATTAGTGACCATTATAGAGGACAGTGTTCTGCTGGCAGCATTTGAAGTGCAATTTTGCATGTGTCCATGGGCTGGGAGACCACAAAGAGTAGACTTTGGATTGACAAGCTGATTTTTAATTTTGTAAAAAGTTAATGCTCTGTTCAAGGTGTACTTTGGAGTATTAAGGTAAACCAGGGTAGTTCCTGTCATCAGGAGGT…	CTGTCTCATACTGCAAACCAGCTCAGCAATATACATTCCAGTGTTTACCTTAGTTGTGACATGAATAGACATATCAGTAAGAAAGATGAAAACTTTATTGCCACTTTACATTTGTTTCCTTGGAGAAATGGCGAAGAGGACATTTTGTTTTTTTTTTTTTTTTTATTTTTTTTTTTTTTTTTTTTTTTTTTTTTTTTGTTTTTTTTT
CCNG1	4:47800697-47808259	CCNG1L2	13:28246118-28246128	TCTTTACTAAGACTGATAAGGATTAAATTTTCTTAATAATAGAGCATGATTTTTTACCTGAGCATTTTATTTTGAGATAATTGTAGATTTACATTTAGTTATAAATTACACATATATGAAGCCTCATAAATGTGTCCTACAACTCGCTAAGTCATTAATTAAAACTCTTGCCCTTCGGCTCCGAGCTGACCCTGTGGTGGGCAGTGTCG	AAAAAAAAAAAAAAAAAAAAACTCTTTTTTTGTCTTTGTGTTTCCTTTTGGATAGTCTTTATTGCTATGTTTTTCAATTTCATTAATATATTCTTCTGCAATATTAGACTACGTCCATTATATTTTTCATTTCAAACACTGATAATTTTCATCTCCATAAAGTTCAACTTGTTTTTTTTTCTAT
CCNG1	4:47800697-47808259	CCNG1L3	21:19306561-19306577	NA	NA
CCNG1	4:47800697-47808259	CCNG1L4	21:42353890-42354133	NA	NA
CCNG1	4:47800697-47808259	CCNG1L5	22:46225203-46225214	CCATTCAACTCAAACATCCTTTGAGAACTGTCTCAGACTGCCCTCCCACCATTCACAAGACACACTCCTTACACACCTTCTGTTTAATATAGGAAAAGAAACAAGGAATGAGGACAAAGAATGCCATGTCTGAACGATTAAGGAGAGGCTATGTTACAAATACTTGGGCTCCGAGCTGACCCTGTGGTGGGCAGTGTCGTCCGGGC	AAAAAAAAAAAAAAAAAAAACAAATACTTGATCCCTCAGTGCTAAATACATGTTCTATAAGTGTATAAAATATATACAAATCCTGTAAATAACCTGTTTATTTTTTATAGAAAGCCTCAACAGAAAATGATTAGAACATTTACATCCATACAATCAGAAAATTCTCCAAATTCATATTT
CCNG1	4:47800697-47808259	CCNG1L6	27:8885297-8885312	ACGACACTGCCCACCACAGGGTCAGCTCGGAGCCGCGCATGTCTAGTCTTTAACGAAAGTGCCATGAGGGAGAGATGACTCTAGGACAGATCTGGCGAAGTGAAGCAATGAAACACT	TGAATTCTTTGGTCTATTTGCCACTTACTATAGCACTCAAACTGAATTCTGAGGTAGCTCTTTTTAATCCCACAAAAGCTAGCATGTCTAGTCTTTTTTTTTTTTTTTTTTTTTTTTTTTTTTTTTTTATTTTTTT
CCNI	32:1612590-1650661	CCNIL1	1:37988615-37988632	NA	NA
CCNI	32:1612590-1650661	CCNIL2	2:56075875-56075892	NA	NA
CCNI	32:1612590-1650661	CCNIL3	14:39770835-39770851	NA	NA
CCNI	32:1612590-1650661	CCNIL4	15:17622856-17622977	NA	NA
CCNI	32:1612590-1650661	CCNIL5	28:19897384-19897399	NA	NA
CCNJ	28:9491683-9511585	CCNJL1	12:50367510-50367525	NA	NA
CCNK	8:67910772-67927216	CCNKL1	9:38582458-38582690	NA	NA
CCNY	2:1387962-1720497	CCNYL1	24:25669053-25669071	NA	NA
CCT2	10:11560287-11586559	CCT2L1	2:10396126-10396139	NA	NA
CCT2	10:11560287-11586559	CCT2L10	12:69517200-69517219	CCCTCACGGCTCACGCCCGGGACCGGAGGGAAGAGAAGCCGCTCTTGGGAGAATTTCTTTAGCATGTGTGTGTGTGTGTGTGTGAATATTGTGTGGTGCATATAATGTGTGTGTATATAATGTAAAC	TTTCCAAATCTTCATTACCATGATAATACAGCAGCAAGCATGCATTTACGAGTCCTCTTTATTTTTTATGTATTTATTTATTTTTTATGTGTCCCCTTTAGATGTTGGGAGAATTGTTTTATCTTGTGTGTCTGCGTGTGTGTGATTCTTG
CCT2	10:11560287-11586559	CCT2L11	19:39135994-39136009	TAAGACTGAACCAGGAGGATGGTTCCTTTTGTGTCTGATGGGTCAGAATCTATTGCCAGTAGCTGTGTATCCAAGAGAAAGCAGGTTCAGCCCTCCGGTCCCGGGCGTGAGCCGTGAGGGGCGAGCGCGTGTGCCGCAGCCGCG	TCTCATACTGTGCATCAAAAAAAAAATTTGAACGATTAAAAAAAAAAAAAAAAGAAAGCAGGTTCAGAGAATGCGCTCACATCTGATTGGACTGGACATCTGGGAAAAAATGGACATGGTGCATTGCTGTGACTGGTGGTTT
CCT2	10:11560287-11586559	CCT2L12	28:14262537-14262553	CTTCGGCACACGCGCTCGCCCCTCACGGCTCACGCCCGGGACCGGTAATATCCAAAGTCTTGATCAGAGTCTCATTTGCAAAAGAGAATTTCAAGTCATGGGAGAGAAACTTTTAGGAAACTAAAATCATTATAAATCATGTTTTGCTGTGGCACTCCCCCTATACCACACACACACACACACACACACACACACA	AAAAAAAAAAAAAAAAAAAAAAAAAAGACTTTGGATATTATCACATCCCAACTGGCACCCCATCTGCCCCCTCCTTTCCTTTTCCATTCATGTTTTAAATTTGCATTGCAAACTATGAAAAAGAAAAGCTTCTGCAGAAAGCAATTTCCTGGGCCAGCAGCTCTTGGACTAATATTCCTTTTGCCATTACCATAGCTTCTGCATGCACATACTCCCG
CCT2	10:11560287-11586559	CCT2L13	28:19337664-19337680	NA	NA
CCT2	10:11560287-11586559	CCT2L14	X:3323818-3323832	CACCATGAAAAAAGAGGTCAATACCATACGCCTGAATTAGAACGCCAAATTAGACTTCTCACTTAACTTTATTGGACTGTGTTGGGGAGATTTAGCTATTGAGAATATAGCTCCCGGGCGTGAGCCGTGAGGGGCGAGCGCGTGTGCCGAAGCCGCGGAACC	AAAAAAAAAAAAAAAAAAAAAAAAAAAAAAGAGAATATAGCTCCATGAACTAATATAAGATAGGGTTGTAAATTTTCATTTGTGATGGGATTTAATTTTCATAGATATTGGGAAGGTGATCTTTATTTGCATTTAAAATGGTGCATGGATGGATTAAGAAAAAAATATGATTGATGGACAGGATTATTAGAAGCTATATTCAAAGGGTG
CCT2	10:11560287-11586559	CCT2L2	2:13896412-13896426	NA	NA
CCT2	10:11560287-11586559	CCT2L3	2:18152113-18152275	NA	NA
CCT2	10:11560287-11586559	CCT2L4	5:33405025-33405041	CAGCTCCAGCCTTGAAGATGTTCACAGGTGCGAGGGAAAGGGACGCCATGGTTCCGCGGCTTCGGCACACGCGCTCCTATTTATTTCTTTTTAAAGATTTTATCCATTTATTTTAGAGAAAGAGAGAGCACAAGAGGGAGGGTCAGAGGGGGAGAGAGAGAGAGAATCTCAAGCAGAACTCCACACTGAGCACGGCGCCCCACGTGGGGCTTGATCT	ATGGAAAAACTCTAAAACTGGACTCTGGTGATGGCTGTACAACTGTATGAATTTTACTAAAATTTGTCTAACTGTACCTTTAAAATGGGTGAGTTCTATGGTACATCGTTATACCTTAATAAAGCTATTTATTTCTTTTTTTTTTTTTTTTTTTTTTTTTTTTTATTTTTTTAAATTTTTTTTTTTGTTCAAAAT
CCT2	10:11560287-11586559	CCT2L5	5:52788135-52788150	CACATATATTACTCAGCCATCAAAAAAATGAAGTCTTGCCATTTGCAATGATATAGATGAAACTAGAGGATATTATGCTACGTGAAATGAGTCAGTCCGAGAAAGAAAATTATCATACGATCTCACTTATATGGGGGAATTTAAGAAACAAAACTGGATAATGGTAGAAGGGAGGAATAAAATAAAACAAGAGGCTTCTCTTCCCTCCAGTCCCGGGCGTGAGCCGTGAGGGGCGAGCGCGTGTGCCGAAGCTGCGGAAC	ATCTGTGGCTCTTATATCCTTAAGTTTGGACGTATAACTGACCTTCTATTTTAACATGGGTCTAATTTATTTGCTGTTTCATTTTCCATAAGATTCAGATGATTTAAAAGTTTGTTTCTCATACTGTGCATCAAAATAAAAATTTGAACAATTAATTGTTAAAAATAAAATTAAAATAAAATAAAATAAAATAAAACAAGAAGAAATCAGAGATGGAGACAAACTGTAAAAGACTCTTAATTATAGGAAACGGGGTTGCTGGAGGGGCAGGAGGTGGAGAATGGGGTAACTGGGTGATGAACATTAAGGAGAGCTATGATGTAATGAGCACTGGATATTACATAAGACTGATGAATCACTGACCTCTGCTTCCAAAGCCAATAATACATTATACATAAA…
CCT2	10:11560287-11586559	CCT2L6	5:70931924-70931940	CACAGGTGCGAGGGAAAGGGACGCCATGGTTCCGCGGCTTCGGCACACGCGCTCGCCACATCATTTCCTTTTAGCCTGAAAAACTTCCTTTATTGTTACTTGTAATATAGGTATGCTAGCAACAAAATCTCTCAATCTTTATCTG	ATTCTTTTATGTTGATTTACATATTTATCATTTCCAGTGATTTTCATTTTATCTGTGTATTCAAATAACTGACATCATTTCCTTTTTTTTTTTTTTTTTTTTTTTTTTTTTT
CCT2	10:11560287-11586559	CCT2L7	7:3163741-3163756	NA	NA
CCT2	10:11560287-11586559	CCT2L8	7:61958712-61958729	AATGTCAGTCACTCTGGATGTAAATAATACAAGAAATTATTTCCAGTTTATATGTAAGGAAACGAATGTTGAGGAATATTAAGGAATTTTCAAAAAAAATCCATTAGCTATTGAGAAACAGGATTCAAACCCAGTTCTCACTCAGGCTACTCCAGGCCTGCTCCCAACTGTTGAATGTCACCAGGAGGCATATGTTCTTGTTTCCTCGTGAATTTACATGAGCACAGATCTCAGTGGGTGCACAACTCTGCTAAGAAATCCTGCTACCGCCCTCCGGTCCCGGGCGTGAGCCGTGAGGGGCGAGCGCGTGTGCCGAAGCCGTGGAACCATGACGTCCCTTTCCCTCGCACCTGTGAACATCTTCAAGGCTGGAGCTGATGAAGAGAGAGTGGAGACGGC…	GTTGTTGAATTTACAAAAAAAAAAAATAATTAAAAAATTTATTTATAATAATATGAAAAAAAAAAAAAAAAAAAAAAAAAAAAAAAAAAAAAAAAAGAAATCCTGCTACCTTATTTAGTTCACTCTCCCACTATCCCAGAAGGTGACTTCATTCCTTTTTCATTCTACTTGAATGTCCTCCAACCCCATCTCATCTATTCTGTCCCAACTGTTGACTTTGCCTCATGTTACC
CCT2	10:11560287-11586559	CCT2L9	10:46861839-46861854	TTTTTTGCAATCAAAGTTTCTGCTTCCCTTAGTAATTCTGCTGCTAGCACAGTAACAGAGGTAGTACCATCACCAACTTCATCATCTTGAACCCTTGACATATCAACTAAAACTTTAGCTGCTGGATTGTCCACACCGATGTTTTTTAGAATAGTTGCACCATCATTAGTTACCATAAGGGAAGCATCTCGTCCACTGCTTAATAGAATTTTATCCATGCCCTTAGGTCCTAGGGTGCTCTTCACCAAGTCTCCAATAGCAATGGCACCAATAAAAGACGACAGCCGAGCCGTCTCCGCTCTCTCTTCATCAGCTCCAGCCTTGAAGATGTTCACAGGTGCGAGGGAAAGGGACGCCATGGTTCCGCGGCTTCGGCACACGCGCTCGCCCCTCACGGCT…	ACATGGAGCCCAAGATGCCAGTAGCCACCACAACACATACTAGATTCATATTATAATGAATATGTGACTTAAATCACACCATATATTTTCCTTTTTTTTTTTTTTTTTTTTAAAAATTAATCGTTCAAATTTT
CCT4	10:61859148-61874030	CCT4L1	29:4837292-4837308	NA	NA
CCT4	10:61859148-61874030	CCT4L2	30:24787730-24787742	AAGAGTAGACTTCAAAGGGGCATTACAAACTGTCACTTCTTCAAGAAGACATAACAACTTTTAAATGTGCATTCATCTAACAACAGAACAACAATGTATGTGAGCAAAGACTGACAGAACTGCAAGGAAAAATAGATGAATCCACTATTGTAGCTGATACTTTAACACTCTTCTATCATAAATGGACAGATCCAACGGGCAGAAAATAATTAACTCAACAACATCATCGGAAGCTTCGTGAAGGCGGCGGGCGCGTTCCGTCCGTCGGCGGCCGGCAGGAATCCGGGTCCATCCGTCCCTCCCAGGCCCGCGCAGACCCCGCCGAGTTGGCCATGCCCGAGAACGCGGCTCCGCGGAGCGGGGCGCCCGCCGCAGCCGCCGGCGGCCG	ATATTCTGCTGTTGGTGGATGAAGTAGTCTACAGTTGTCAATTACATGTAGTTGATTGATGATGTTGTTTTTTTTTTTTTTTTTTTTTTTTTTTTTTTTTTTTTTTTTTTTTTTTTTTTTTTTTTTTTTTTTTTTTTTTTTTTTTTTTTT
CCT5	34:4035851-4049131	CCT5L1	27:44359994-44360010	CCATGGTGCCGCCGCGGCGCTTACTTTCCCCAACCGGCGGAGACCGCCACACCTTTAATTTTCAATAATGCAGCGACTGTAGCATGTGATTCCAGGCTGCAGCCTCAGCCACCCGTAGCCATACACAGCTGCTGCTACAGCGGTCATGGCCATCGGAACCTCTCCTCTGCTCCAAGGATTCTGGGGGATCCAGCAGTTCTGGCTCTCACCCAGGACCTGGAACTGTCGTGGCGTG	AAAAAAAAAAAAAAAAAAAAAAGAAAATTAAAGGTGTGTGAGGCACAACCTCGTCCTCCGGCCAACACAGGCCTGCCCGTTGGGCCGAGCTCAGGCTGCCAGGGTCACTGCAGCC
CCT5	34:4035851-4049131	CCT5L2	37:16190140-16190152	CGACGCCATGGTGCCGCCGCGGCGCTTACTTTCCCCAACCGGCGGACCTTTACAATGTTTAGTAGCATGTTCTGTGTGTTCTTCTAAGCAGCCTACATACCTATATACATACATAGCACATGTGTACGTACGCAGGCATACACCTATGTGACTTCCTATACAAGCAAATTATAAGTTAGTGGCTTATATTC	AGGATTCGTGGAGAGTAAAAAAAAAAAAAAAAAAAAAAAAAAAAAAAAAATAAACATTGTAAAGTAAAATGAGTTAATTATGATACAGTTGAACAGATTTTTTCTTTTGTGGGGGAATAGGCGGGT
CCT6A	6:546278-556996	CCT6AL1	7:25611399-25611429	NA	NA
CCT6A	6:546278-556996	CCT6AL2	13:42778358-42778373	NA	NA
CCT7	17:49614876-49632777	CCT7L1	30:13197924-13197938	AACTTGTATACATTACCAATAAACAATCCTAAAATTAAGAATTATAATTGCATTCACAATAGCATCAGAAAATATGAAATACCTGGGAAAAAGCTTAACAAAAAAGTGACTTTTACAATGAAAACTATAAAAAAAATATGAAAGTAATTAAAGGAAACCTAAGGGGCCACCGAATAAGCCTCCAAAATGATGCCCAC	AAAATTAAATATTTCAAAAAAAAAAAAAAAAAAAAAAAAAAAAAAAAAAAAAAGGAAACCTAAGTAAATTGAATGATATCTAAGTTCACAAATTAGAAGACTTAATGTACTCAAGGTGGCAATACACTCCAAATAAATCTACAAATT
CCT8	31:24061185-24075002	CCT8L1	35:10826152-10826160	CCGTGCAGGCAGCCGCTCACGCGCTCGCTCGGAAGATCCCGGAGGCAGCGAGGGGCACGCAAAGCCTCCCACAGCCTCTTTTCAAGTCACTTGAAAGACTTAGGAAATCTAAAACCTGAAATTAGAATAGGATTAGTCTGGATTGCCAATAATGCCCCCACAGT	AAAGAGCTCTGGATCCAGGGCTTCACAAGGTTAGTGGCCCTGGGACATGCCCTGTACTTTGGGGTGAGAAGCAGGAAAAGGTGCCCCGTAAAAGTAAGGGAGGAGTAGAACTAAGTGGGCCCACATATGGCGCACAGCCTCCGTACAAGTC
CD164	12:66295444-66309055	CD164L1	36:17366992-17367116	NA	NA
CDADC1	22:2443459-2489147	CDADC1L1	5:73518536-73518550	NA	NA
CDADC1	22:2443459-2489147	CDADC1L2	16:30109631-30109644	GTCCTAGCCAAGCCTAGTCCTGGAAAACATAGTACTGAATGAAGTCTAGTGAAAGAAATCAACATTTTTAGTTATCTAGCACTGAATGAGACAAAAAATAATAGTGTTGTGAAGTATTATGAATAGAGCTCCCTATATAAAAACAAGTATTAATCTTGGAAGGGAAACGTTCATTAAAAGCTGAGGGAGGGCGGCTGGGAGGAGGCGGGAGGTGGAGCCGCCGGGGCCGGGATCATGCCAGCCCGCGAGAGGTATTCTGGGCAGCAGAGGCCGCTGGGCTGGGGATGAAAGAAGCAGGGCAGATGCAAAGTCTGGAGAGCGCGGGGGCCGGGCGCTCAGTCAGCATGCAGACTGGCAGCATGACGGGTCAAATACCAAGGCTTTCTAAAGTGAACCTTT…	CTTCCTAATTCTCTCAATCCAATAAAGCTCCATCAATGCCCAGCTCTAGCACCTTTCATCTGCAAAGCCTTCTGATTTCCCTCAGCTTTTTTTTTTTTTTTTTTTTTTTTTTTTTTTTTT
CDC123	2:24184780-24239495	CDC123L1	11:26934285-26934303	NA	NA
CDC20	15:16803204-16806935	CDC20L1	7:54732489-54732502	ATTTATAGCTTTAAAATGCCTGTATTAGAAAAAAAAATCTCTTATCAAAAACCTAAATTTCCACCTTAAGAAGTCTGAAAATGGGCACCAAGCTTAATAATAACAAAAAAGCAGAAGGAAAGGAGTAATAATGATTAGAGTAATAATGGAATACAAAATAGAAGAACAATAAAGAAATGTCAGGTCGGCGATTGGAGCCCGCTGGGAGCTGCAGGACTCGGCGGGCACCGCGTCCATGGCGCAGTTCGTGTTCGAGAGCGACCTGCACTCGCTGCTGCAGCTGGACGCGCCCATCCCCAATGCGCCCCCCGCGCGCTGGCA	TTTTTTTTTTATTTTTAAAAAAAATGTTTTTCCCCCTCTATTAAAAAAAAAAAAAAAAAAAAAAAAGAAATGTCAATGAAACCAAGGTTTTGTTATTTGAAAATATGAACAAAAATCAACAATCCTTTAATAGGCCAACCAAGAAAAAGAAGATGAACAAAAGCAGAGAAGAGGGGTCATCACTACCAACCTTATAATAATTTAAAATAATATAAGGGAATACTATAAATAACCTCATGCCAACATATTATACAA
CDC34	20:57960506-57967388	CDC34L1	23:1865734-1865786	NA	NA
CDCA3	27:38172717-38174963	CDCA3L1	8:45513621-45513636	CACAAGAACTGGAGCCTCAACTCCCGACGCCGAGTTTCAAACCTCCCGCCGTGATGTTTTATTTTAATCTGGCTAGAAGTTGGGCTGTGTTTAGTGTTTGCTATAGCTGTAGGTGCTGCTGGCTTAGAATCCCTCTATGGTCCTTATTTTTGTCTCTCCTTTTGACTTTAGGATTCTCTAAAAAGTCCTCAGAGTCTGTATTTGGCAGTTTTTTCA	ATTGAAAATTGAATATAATTCATTGGATAGTAAGCCTTTAGTGTGATGTTTTATTTTTTTTTTTTTTTTTTTTTTTTTTTTTTTTTTTTTTTTTTTTTT
CDK4	10:1812864-1815815	CDK4L1	8:44126875-44126889	NA	NA
CDK5	16:15105177-15113085	CDK5L1	30:18107350-18107365	NA	NA
CDKL4	17:31189107-31250121	CDKL4L1	23:29926036-29926056	NA	NA
CDV3	23:30464103-30483633	CDV3L1	18:54348764-54348779	NA	NA
CDV3	23:30464103-30483633	CDV3L2	37:18008960-18008977	NA	NA
CE10	24:32847081-32848913	CE10L1	8:73448222-73448240	TTTCATTGCATTTGTATCTTTGGGGTAAATCCCCAACTAATATTCGATAAAGGAGGAAAATTGTTTAGACTTCATTTCGTTCTATGTGTTCATCATAGAAATCCACCCAGTTGATATGGCTGGTTAAAGGTACTTAGATTACATAGCAGGTTGAAATCTAAAACAATGTTTTTCAAGATACAACTGGGTTTGAACAAACATTGAAGACACTCAAGAATCATTTATTGTAGAGATAAAAGAAATAAGCTGTTGTCAGCCCAAAATTAAAACTGATATTACAGAAATGCTGTCCCAAATGC	CCTGAAAAATAAACAGTGGCATTAACCCAGAAAAAAAAAATAAAATAAAATAAACAATTTTCCTCTTTTCTGCTTATTCTAATTGTAGTAGCTTCAGGAAGTAGTTTCCTTCCCTGCCCCAGCCCCACAGCTAAATCTTCCCAACACAACACTCCACACCACCTACAATCCAAAACGTGTCGAATTTCAATTTGCAATTTGCAATTTTTGTTCTCTCATCCTCCAATTGATTTCTTGTTAGCTCAGAATTATATGAAAAATA
CENPU	16:45821111-45857636	CENPUL1	32:22768376-22768392	CACTGGCTTTCTTTCCTTTCAGACACCAAATATGTACACATCTTGCCTTCCCTTTTAAACCAAAATTCTTGTAAAAGCCATGCAGCCTTTCTTTTTAGAAACTACTTGTTTAGGACTTATCATTT	AAAAAAAAAAAAAAAAAAAAAAAAAAAAAAGGGAAGGCAAGAAAGTTAAGAAATATTATTTCCCAGTGATTTGGAAGGTACTATGTTTAGGGTTTTTTTTTTAATTCAACAATTTTTTTGTCATTTTAACACCTGATATTATTAAAAATGTATTCTTTTATAATTCACATTGAAGTTTTTTTT
CEP57	21:5314290-5360474	CEP57L1	34:29176913-29176928	NA	NA
CFAP20	2:58445932-58459437	CFAP20L1	14:7631147-7631163	GTCTCTGTCTCTCTGCCTCTCTCTCTGTGCGTCTCTCATGAATCAATCTATCAATCAATCAATCTTAAAAAAAAAAAAGTATATATTCAGGGCGGGGAGAGCGGCGCGGGCGGCCGTTGCTGTGGTTTCCGAGTCG	CTGTTTTCCCCCTTCCTGGGTCTCCTGCCCCCTGGCCCCCCCCCCTGTCGTTCCCCAAGAAACAAACTTATCAACCAACAAACTTAAAAAAAAAAAAGTATAAACCCCTCAAAATCCCATCACCAGAAAAAAACATTGTTAACATTGTGGTGAATATCCTCGCAGACCCCTCTTCTGGCTTGTATACAAATAGAAATATAATTTTATATTAA
CGGBP1	31:207383-214075	CGGBP1L1	13:54724191-54724205	ATGAAAAAGGCTCCACATCACTCAACATCAGTGAAATACAAATCAAAACCACAATGAGATACCACCTCATACCAATGAGAATGGCAAAAATTAACAAAACAGGAAACAAATGTTGGTGAGGATGTGTAGAAGGGGGAACCCTCTTGCACTGTTGGTGGAAATGCACATTGGTGCAGCCACTCTGGAAAACTGTGGAGGTTCCTCAAGAAGTTAAAAATAGAGCTACCCTACTACCCAGAAATTGCACTACTGGGTATTTATCCCAAAGATACAGATCTGGGGGACACGGCGGCCGCCGCGGGGCTAGATCGGGCGGCGGCGGCGGCGGCGGCGGCGACGGGTCTTCCGCCTCCCTTACCCCCGTGCTCCTTTTTTCTTCCTCCTCCTTTCCTTTCCGGC…	ACCCACGCCTTGTAAAAAAAAAATAAAAAAAAAAAAAAAAAAAAAAAAAAAAAAAAAAAAAAAAAAAAAACAAAGATACAGACCTAGTAAAATGATGAAACACCTGTACCCCAATGTTCATAGCAGCAATGTCCACAACAGCCAAATTGTGCTATGTGAGGCCCTTGACAGATGAATGGATAAAGAAGATATGATATC
CHCHD1	4:24217363-24218739	CHCHD1L1	1:64719513-64719529	NA	NA
CHCHD2	6:581276-585367	CHCHD2L1	22:46891494-46891494	NA	NA
CHCHD4	20:4268670-4281624	CHCHD4L1	5:29794489-29794503	ATAATGTATTATATTATACAGAGGTAGAGTTCAGTGATTTACCAGTCTTCTATAACATCCAGTGCTCATTATAGCACTTGCCCTCCTTATAATGCCCATCACCCAGTTACCCCATCCCCCGCCTCTCCTCCCCTCCAGCAACCCTCAGTTTGTTTTCTATGATTAAGAGTCTCTTGGTGAGCCCGCTGCCGCCTGTGCCGCCACCACCGCTACCGCCGCCAGGTCTGAGCCCCGGGGCTGCAGCCATGGCCTACTGCCGGCAGGAAGGGAAGGATCGAATCATATTTGTGACCAAAGAGGACCATGAAACTCCGAGCAA	AAAAAAAAAAAAAAAAAAAAAAAAAAAAAAGAGTCTCTTATGCCAACCCAGACTATTAATCAGATGCTGGGGTGGGGCCTGAGGAGGGGAATCTGATTTTGTTTGTGCTCTGCTGGCAATTCACATGCTATTAGATCTTGATAATCACTGCCTCCATCATCTCGCCTCTGACTCTTCCATACCTAGCAGCAGCAA
CHCHD4	20:4268670-4281624	CHCHD4L2	11:39883165-39883176	TGTAGCACTGAACCAGTATTTTGTTACTGTCAGAAATTGTAAAAAAATTTTTAGACATTGTTTTCTAATATGTGATAAATATGAAGAAAAAACACTGATTGCATTATTCATGATAATTAGCCTTTTGCCCAAGATAATTTGTAAGGGAGCTAATTTATAAAATAGCTCTTGACATATAATTGCTTTACAAATAGTTTATAGGCCGCCTGTGCCGCCACCACCGCTACCGCCGCCAGGTCTGAGCCTCGGGG	AAATGAAATAGAAACAAAACCATCTTCCTTTAAAAATGCTGGACTGGGGCCATTCCTAATACAAGAGGCCAGATGCTCAGATACTTATTTCTCAAGAACCATCTTGACCTTGAGTATATGAGGAGGTACTATATTTCATTTCTGATACATTTTGGTTTTAATTTTTACGTTGAGCTCCCATGTTTTCTGTGTTTGGAAATTGGAGCTTTAGACCCTCTGACTCATAATCCCTTTCTGAGTGAAGAGAAAGGCTGGTTTTGCTGTTTGTGTTATTCCAAAAGCCCTGGTTTGGGGCCTGTGTTCACACTGGTTCTGTGTCTGTTCAGATGCAATGTTCTTGAGAGGTGGGGACCTAATTGTTACCAAAGTAGCAGCTAAGAGAAGCGGTGTGAATTAAAT…
CHCHD4	20:4268670-4281624	CHCHD4L3	18:12802418-12802436	CCCTGCAAGTACCCAGATAGGCACTTCTGTTACATTCAAATTGGGTCTGATTTGTGGAAATTTAATCCAGAGCCTCTTCTAACAGAACCCAGCACAGTTGGTAGGCCATGCCATGTTGTGGGGTAGAGTGATACCAGACTTCTAAAATAAAAACACCCGTCTCAAAAGTGTCATGAGTCATGTGATACCACATCTGAAACAACCCTATGGATAGAAACTTTGTGGTTTAGGGCGCCGCCCGCCCTGCCTAAGAAGAGGTCACCGCGTGAGCCCGCTGCCGCCTGTGCCG	AAAAAAAAAAAAAAAAAAAAAAAAAAAAAAGAAACTTTGTGGTTTAGAACAGGAACATCAAAAGTCTTTGATTTTCCTTTTTTATAAGTGCTCATTTTCTTCTTTTTTTAAAAGATTTTATTTTAAAGATTTCATTTATTTACTCATGAGAGACACATTTATTTACTCATGAGAGACACACAGAGAGAGGCAGAGACACAGGCAGAGGGAGAAGCAGGCTCC
CHMP2B	31:789586-817925	CHMP2BL1	5:12948472-12948494	NA	NA
CHMP4B	24:22995677-23050084	CHMP4BL1	18:49117126-49117143	ATGTTGAATTTCTGTAAAATAAACTGTATTTGCAAATCCAAAAAAAAAAAAAAATGAAGGTGGAGGGGAATAATTTAGCTCAGACTTTTGGGAGAACAATTTGGTGGTTTGCTGAAAAATGGGAAAGTGTCTTAAT	AAAAAAGAACCGAGCATTCAACCAAACAAGGTTTCAAAAATATTCAATTAAATGGCACATGTTATCAAAATAAAATGAAGGTGAAGAGACTGATGAAATAA
CHORDC1	21:10129812-10152416	CHORDC1L1	2:20437257-20437272	AATCTAGATGGGGATATGTGTATACACAAGCACACATAAACAACATACACACATACATTCCCTAATACTGTCCACTGAGAAGACTGGAAAAAATGATACCCCAACAGCAATGAGTACATTTAGCATCCAAATCACGGCTTCTGGGCAGCCCGCCGCCCTTCCCGGCGTGTGGAGCAGGCCCGCGAGCGGCCGGG	AAAACAAATCACGGCTTCTAAATGCTGTATTTCACCATAAGGGAACTAGGGGTGTTTGGAGAAGTTGCTAATTCCAAACCTGGTGCAAGCAATGCATATGATAAGACTGGGACATCTTCTTGTACTAGAAATCACAGAATTATTAAAATAATATGTTAAAA
CHORDC1	21:10129812-10152416	CHORDC1L2	7:14170632-14170643	GCGGGCTGCCGGCTGGGGCGGCTGCCGGCTTGATTAGGGTTTTTAAGTATATTTGGGTCATAGCCCCCAAAGGAGAGTACCCCAAACTCACATGGAGTAAGAGAAAGATAATAGTTGAGCTATTC	ATGGAAAATTAGTCCTGGCTTCAAATCCAGTCCTAATCTGGAAAGCATTTGAGAGACTGTTGAGTTGTGCTGATTAGGGTTGGTAATGGAAGATGGAGAAC
CHTOP	7:43418902-43428012	CHTOPL1	23:42614248-42614263	NA	NA
CHURC1	8:39301090-39318352	CHURC1L1	37:7910596-7910720	NA	NA
CIAO2A	30:28582048-28597856	CIAO2AL1	7:54923963-54923979	NA	NA
CIAO2A	30:28582048-28597856	CIAO2AL2	9:38174264-38174327	NA	NA
CIAPIN1	2:58977592-58992785	CIAPIN1L1	23:45531993-45532010	TGAAGCTTGTCGACCAGATCTTTCAGAGCCTCCAGGGGGGATGACTGATCCCAGACCACGGCCACCAACTGGCCAGCTGAGATCCCATAATCTGCCATTCCTGCCATGCTGATGGACCTGCCTCCCGGGCTCGCTCCGACTTGCCGGATTTAATGACAGCCCCTCCCCAGCTCAAAATGTTCAAATCCTTTCTCTGCATTATAGCCTCCCAAACCCAAAAGAACAAGACCAAACCAATCCAGATACACCATAGCCCATAGGGTTCAAGTGACACCTGCCCAGGTTTGTTTCAATGGTCTGCTCTCAGCTTCCGCCAAGCAAAGT	TTTTGTCAATCGTCATTAACGGTGTTCTCTTTTAAAAAAAAAAAATAAAAATAAAAAAATAAATAAATCCGGCAAGTCACTTCTGGCCTCCAGAAATTACTTAATTAGCTGTTGACAAGTGAAAGGGAGTTATTTATTGAAGCAGGCAGCCCATGCCAC
CITED2	1:31522911-31525342	CITED2L1	5:41203228-41203243	NA	NA
CKAP2	25:134914-190810	CKAP2L1	3:87938790-87938802	TCCCCCATCAGGCTCCCTGCGTGGAGCCTGCTTCTCCCTCTGCCTGTGTCTCTGCCTTTCTCTCTCATGAATAAATAAATAAAATCTTTAAAAAAACATATAAACATATTCTTTTTTTTTTTTTTTTTTTTTTTTTTCTTTTATTATATTATTTTTTATATAATTTACTCTTGTTACATTTT	CATGGTCAGACTGAAACCCTCAATTTGGGAAAGATAAATGATGGTTTGGTTATTATGATTATGCATAATCCTTTAAAGACAAGTCTAGGACAACGGTCCTGGGCTTACCAGGTTGATTTCTCCGTCCTCTCTCTGAGACCAGGTTGCAGGGCAGAAAAGAATGCAAGATTTTTATGACTCTTATAATTAAAAAAAGAAGCCATAAAGCAACTCCTCAAAAAGAATATGTAATATAAATGTGCTTGAAAATCCTAGTCTTTTGTTCACTCATTCCATTTGTATAATGGCACCTGTCTTTGGTTCTATTGTCTTATGCTCTCGAGAAGATTTTTATTCTTTTATAAACTGTACCTAATGTTGATTAAATATATCTGTATAGTGAAAAAAAAAAAAAAAAAA…
CKAP2	25:134914-190810	CKAP2L2	32:4779925-4780040	NA	NA
CKB	8:71284104-71287379	CKBL1	1:715643-715657	AAGGGGCAGTCGGTCCGTCGGCAGCTCCGGGCGCGGCGCAGGCGAACCTCAGCAATATTTTAAAGGGAGTTTTTTGTTTTGTTTTTTTGCTTGGTTTTGTTTGGTTTGGTGAGTGGTAGGTTTCAAC	AAAAAAAAAAAAAAAAAAAAAAAAAAAAAATAAAATATTGCTGATCATTGACAATACCGGTCACCCAAGAGCTTGGATGGATGTGTGCGATGAGATCGGAGTTATTTTCACGATGCTAACAGAGCATCCATTCTGTGGGCCATGGATCAAGGAGTAGTTTCAACTTTCAGTATAAAATATGCTTTGGGGATATCTGGGTGGCACAGTGGTTTAGC
CKB	8:71284104-71287379	CKBL2	5:45915849-45915861	GAAGCCGCTCGGCGTGCTCTTGGCGCGCAGCTCCGCGTAGAGCTCGGGGGTCAGCACCTTGGCCATGTGGTTGTTGTGGGCGCTGAGGTCGGGGAACTCATCCTCGGCCGGGAAACGGAGCTTCAATGTGTTGTGGCTGTTGGAGAAGGGCATGGCGACGGCGGCGGCGGCGGGCGGCAGGCGGGTGGCCGGGCGGGGAAGGGGCAGTCGGTCCGTCGGCAGCTCCGGGCGCGGCGCAGGCGAACCCAAACTGTTTTAATCTAATCAGTGATTGAGCTCACTTGAAGTTGAAGTACATCCTTTGTAAGGCTCAGTTGCAGAATTTTAGTGATTTGCTCCCCCTTTGATTTGTCCCAAGCTCTAACGTGGAGTCTCAACCAAGAGACTGGAGTACCTACC	ATCAAAAAAAAAATAGGGTTGCGGCCTGCAAAAAAAAAAAAAAAAAAAAAAAAAATAAAACAGTTTGCCTCCATCCTAGATGCCTGCCAGAGGATAGGATAAATTTTCTCTGGAGAAATATAACCTCATCCAGAGCCTCATAGTTTTTCTGATAGCTCCCAGCATTCAAAATTAACAGGCACACCAAGAAATAAAACAAAGAGAAAAAGAGGATCAAAACAGACTCATAGGCAAT
CKB	8:71284104-71287379	CKBL3	15:29714284-29714301	ATACTTTCAGTGTTATAAATTCCTCTTTAAGCACTGCTTGTGCTGGATCCTACAAATTTATCAGTTTTTTTTTTTAAATTTACATTTAGCTTAAAGTATTTTTAAGTTTTCCTGAGATTCTTTTTTTTTTTTTTTTTTTTTTTTTTTTTTTTTTTTTTTTTTTTTTTTTTTTTTTTTTTTTATTTTTTTTTT	CTCGTCGCTGGGCTTGTAGCCGCCGTGCCGGTCCTCGATGATGGGGTCAAAGAGCTCCTTGAACACGTCATAGGACTCTTCGTCGCCTGCCACGCAGCCCACGGTCATGATGTAGGGGTGGCCGGGTTGTCCACGCCGGTCTGGATGACGTCGTCCAGCGTGAAGCCGCTCGGCGTGCTCTTGGCGCGCAGCTCCGCGTAGAGCTCGGGGGTCAGCACCTTGGCCATGTGGTTGTTGTGGGCGCTGAGGTCGGGGAACTCATCCTCGGCCGGGAAACGGAGCTTCAATGTGTTGTGGCTGTTGGAGAAGGGCATGGCGGCGGCGGCGGCGGCGGGCGGCAGGCGGGTGGCCGGGCGGGGAAGGGGCAGTCGGTCCGTCGGCAGCTCCGGGCGCGGCGCA…
CKB	8:71284104-71287379	CKBL4	15:49345607-49345624	NA	NA
CKB	8:71284104-71287379	CKBL5	15:61012023-61012037	NA	NA
CKB	8:71284104-71287379	CKBL6	24:32006297-32006312	TACAAAAAAAAAAAAAAAGATAGGATTTTGCCTTCAGACTATTTCATGTGGGTGTGGTTCATGTAGGAACTTTTTTTTTTTTTAATTTTATTTATTCATGAGAGAAACAGAGAAGCAAGAGACATAGGCAGAGGGAGCAGCAGACTCCCTGCAGGGAGCCTGATGCAGAACTTGATCCCAGGACCCCGGGATCACTCGCTTAGCCAAAGGCAGACGTTAAACCACTGAGCCACCCAGGTGTCCCTTATATAGGAACTTTAATTACTAGAATTTATTTCAAAGAAAAAGCCTTAGGTTCGCCTGCGCCGCGCCCGGAGCTGCCGACGGACCGACTGCCCCTTCCCCGCCCGGCCACCCGCCTGCCGCCCGCCGCCGCCGCCATGCCCTTCTCCAACAGCC…	AAAAAAAAAAAAAAAAAAAAAAAAAAAAAAGAAAAAGCCTTAAAAAAAAAAGTTTTGGTCTCTTATCAAGTATTAGGCAGATGAACATATATTTTTATTGATTCTTCTCTTTAACTGACTACTTCTGGTTTTGTTTTGTTTCGTTTTGGTTTTTTTTTTTTAATGATTTTTACCATGATTAGTCCTGATCCCATCGGGCAGAGAGTGGCTGTTTTATTTTTTAAATTGTTTTTTAGGGATTACTCTGCAACAATTGAAATGAAACTGAACCCTATTGTTGGACATTTTACGTGCTT
CKB	8:71284104-71287379	CKBL7	32:35043521-35043537	TCACTTATTTTATTATATTTTATAATTGCCAAATACATATTTTTCCAATCTTTTTTTTATTAGTATTTTCATGTATTTTTATTTAATTTCAAAAATGACTGTTTTGGTTCGACTGCGCCTCGCCCGGAGCTGCCGACGGACCGACTGCCCCT	TTATGTGAAAAAAAAAAAGTGTTTGGGCCTGAAAAAAAAAAAAAAAAAAAAAAAAAACAAAAATGACTGTTTTTATGTTGGAATAATAACAGTTCCAGGTAAGTGAATGCCCATAGGAAATAACACTTTTAGTATCTTATTTTTTAGAGTACTTAAGATTATGTTTCTAAAACACTAGCCAATTTATTCTGACTTATTGTAAAAG
CKS1B	7:42496912-42499907	CKS1BL1	2:67238394-67238427	CTCAGGTATGTCCATCTTGTAAAATTAGTATGATTTCCCAAATTATAGCAGCATTACATATCTTAGGGTTTTCTACAAACTGCCTAAGAAAACTGAGCTGTTTCAGAAAATAAACTACTTTCAATATTCTTGCTAGGTCTGAAAATCATTTTAAAATTGAGCTCAGGTGCTGCTGGGAGTTGTTTGGAGGTTGCCGT	AAAAAAAAAAATAAAATTGAGCTCAAATGGCAAAAGAATAGAGAAAGAGAGTCAGCATTTAAAAGATACCACATACACAATAGACTTGGTCCTCCCCTTTCTCTAGCAAATTATGAGTAGTGTTCAATCATCTAACAGTAGACAG
CKS1B	7:42496912-42499907	CKS1BL2	6:21227539-21227553	GGAAGTGCTTGCCGCACTTTCTCTTAAGCATCTCCTCCTTTGGGCTTTTGTCCAGCGGCCCAGACCTGGTCTGTTCGGGACCGCTGAGCCCCAGCTCCAGAATCATAAGGTGTGTGTTCCTTCATGTCTGGCTCAGCTTCTTTATTATTTTTATTTTTTAAGATTTTATTTATTTAGGGGAGTTGTTTGGAGGTTGCCGGAGTGGGCCTGACGGTCCTCAGGCTGAGTGATCACGTCGCACAAACAGATTTACTATTCGGACAAATATGACGACGAGGAGTTCGAGTACCGGCATGTCATGTTGCCCAAGGACATAGCCAAGCTGGTCCCTAAAACCCATCTGATGTCTGAATCTG	GGGGATTGTGTAAACTTGCAGTTTTTTTTTCCTGCCAGGTGTTGTATGTATGGTGGTTTATGTTTCAATATATTGGAGACTTTTCATTTTATTCAAGGAATCTGTTCCATGTTTAAAAGCCTTGATTAAAGAGGAAGTTTTTTATAATCTAAAAAAAAAAAAAAGATTTTATTTATTTATTTATTTGAGAGAAAGAAACAGACAGAGAGAGAACACCAGAGCAAGAGGGAGAAGCGGGCTCCACTTCTGAGCAGGGAGCCCCACCCGAGACTTGATCCCATGACCCCACGATCATGACCTGAGCCGAAGGCAGACATGTAACCAACCGAGTCATTCAGGCGCCCC
CKS1B	7:42496912-42499907	CKS1BL3	X:31726833-31726850	TTGTGTCTCTATCTCTCTGTCTCTCTCTATCTCTGTGTCTCTCATGAATAAATAAAATCTTTAAAAAAAAATGAAATGGAGATAACAAAACAATAGAAAAAATTAATGAAATTTATAGGTGATGTTTTGAAAAGATATTGAAAAGATAACCCGAAAACAGGCCTTTAGCTAGACTTATCAAGAAAATAGAAGGCTCAAATAAAAATATAAATGCCTTTCTATAAAATAATAAACTATTAAAGAAATTAAGGAAGCAAAATCAATTTATAATTGCATCACAAAGAATAAAATACCTAGGAATAAATTTAACCAGGGAGGAGTTGTTTGGAGGTTGCCGGAGTGGGCCTGACGGTCCTCAGGCTGAGTGATCATGTCGCACAAACAGATTTACTATTCGGA…	CCCTCTGCTTGTGACTCTAACTCTCTGACGCACTCTATCTCTGTGACTCTCATGAATAAATAAAATCTAAAAAAAAAAATGAAATGGAGATAAAAAAACAATAGAAAAAATTAATGAAATTTATAGGTGATGTTTTGAAAAGATATTGAAAAGATAACCCGAAAACAGGCCCACAAAGCACGTGGTGATGTGTC
CLIC1	12:1209777-1215229	CLIC1L1	15:57021810-57021825	TAAAACTTTCAGGGCTTTCAGGAGCCCCTTCTCCAGATTATCATTGAGTGCCGGGTTTGAATTCTTGATGTAAGCAGAAAATTTGGCAAATATGTCCAGCCCAGCCGTGTTGGATTCAGGGTTCAGAGCTGCCAGCTTGGGGTACCTGGGAGGGCACAGCACTGCCTCCAGAAACTCCTCAATCTTGTTGGTGTCTGTGTGTACTTCAGTGCCATACAGAAGGAATGGGAGCTGCCCTCCTGGGCACAGCTTCTGTACTGTCTCGGTCCGCCTCTTGGTGTCAACAGTGGTTACGTTGTAGGTTACTCCTTTGAGCCAGAGTACCATGAACAGTCTCTGGGAGAAGGGGCAGTTCCCAATCTTGGCCCCATCACTGCCGGCCTTCACGAACAGTTCAAC…	ATTCTTTTTTTCTCACTAAATCCTAAAAATAAGAGTGAAATTATTTTCCTAAAGGGAATTTGCCAAACTACCATAGGGCTTTTAGCAAGTCAGTCAGTTTTGGTCAAAGGCTATTCCTGTATTTTTGTTATCTGCGCTTTCGAGGTGACA
CLIC1	12:1209777-1215229	CLIC1L2	22:34782189-34782202	GTGCTTCATATTCAAGTGTTAAGGTCAGTTCACATTCTGCTAGGATTTAATTGATCTTGGCCTTAGCTCAGCTGATCTTGATCCCAAGCTATGAGTCATATTTATTCCTTTACTTGTAGACCAGCTGTTCTCCAGGGATGTTTTTCTCATCCAGGAACACAGAGTGCAAGAGGTCAAGGCAAATAACAATCATCCCCCCTCCCAGAAGAAGTGGATGAGACCAGTGCTGAGGATGAGGGCATCTCACAGAGGAAGTTTCTGGATGGCAATGAGCTCACTCTGGCTGACTGCAACCTCTTGCCAAAACTCCACATAGTAC	AATTAAAACACATCACATCCTTGTTGTTGTGCAACTTTTTCTCACTAGCTTAACCCTAATCTTGGCCCTACTGGACATCTTTTTCTTCCCCATTGACAGACTGTCTATATGTGATTTGCATTGATAAGTGGTATGTTTGCATATGTGAAGCAAAGAGAATCAGTGTGATTGTTATTTGTTTTTGTTTTTTTTTTCCAATCTGTATTTTATTACTGAAATACACTGCCCTACCCGCACCACCCCACAATAAAAATCTTACCTAGATTCCCCATCATCCCCTCCAGCCCCCCAGCCAGCCCTGTAGAAGCGCTTCAGGATTCTCTGCCCACTGGCCATTTTGAAGTGTGTCCTTTGGGTAGCCACGTGAAAACCAGCTGGTGTCTTTGTGGAGAAAACGGA…
CLIC1	12:1209777-1215229	CLIC1L3	X:60086624-60086640	AACCTGAGGTTGTTCTTCAGCCATGGTTGCGACGGGGTGTCTTTGACAGTTTAATTATATTTTGTCTTACTGTGTTCTCTATTTATCATTCTTGGAATTCATTGACCTTGGATATTTAGATTCATGTATTTCATGAATTTGGGATGCTTTGACTATTAGTTAAATAG	GGGCAGTGTATTTAAGTAAAAAAAAACAGATTGGAAAAAAAAAAAAAAAAAAAAAAATAAACTGTCAAAGACAAAGGAAATCTCAAAATCAGTGAGAACTGACAAGTACAATGGATTCTAATTAAGATTAACAGCTGAACACCATGGAAACCAGAAAAGTGAGATGACAAATCTAGAATGCTGGAAAAAGGGGCACCTGGGTAGCATAGTTAAGCATCTGACACTTGCCTGGT
CLIC1	12:1209777-1215229	CLIC1L4	X:66931569-66931583	AACTGACAGAGAGGGGAAGAAATGTTTATTATGTAGGAGAAGAAAATTGCCAATGACACCATTACAAATAGGCCTTCCTTTGAACAATGTATTATGGAAATTTGTTCATCAGAGATGAAGATGAATCTCTTTTCTCAAATAAGAATAGCATATAAGAGTTTCTACTGGTCCCCGTCGCAACCATGGCTGAAGAACAACCTCAGG	AAAAAAAAAAAAAATTGAAAAAAAAAAAAAAAAAAAAAAAAAAAAAAGAGTTTCTACTCACTGAATATATATATATACTTTTTCCTTGCATCCCGCTTTAGCCAGAAGAACTAAGTCATGAGTCCTCAGTGACAATCCTCTTTAGCCAAGTCCCCATTGATTCGTTGCTCATTTCTTTGGGCATCTCTATAAGTTCTTCTGATCCATCTTTAACCTCCTCTCATAGCATCAT
CLNS1A	21:21136913-21160703	CLNS1AL1	16:15851132-15851149	GCGGCGACCCCAGCCGCTCGCCTCGCCCCGCCCCGGAAGCCTAGATCATTTGCATTTAAAACCATTATTGATGTCAGAGTTTCTCAGCCATTTTGTTTTTTGTGTGTTTCCTGTTTCTCAAACTTCTGT	ACTCTGTTCATCTATGCTTTTAATTGGTATATTTAGATCATTTATAGGTATATCCATCAACTCAGGTTAACTACTACCTCTGAGG
CLOCK	13:47684409-47825733	CLOCKL1	22:48689177-48689190	NA	NA
CLPB	21:25710634-25855418	CLPBL1	13:58749705-58749815	TAGCCGTCGACCAACACATCTGCCACCTCACGGTCCCAGAGCAGCGTGATGTTGTGCCTTTGCTTGGCTCTCTTGGCCCAGAAGTTCAGCTCCTTGTTGACAAGTTGGATGAGCTCCGAGTGGCAGAAGGGGAGGAAGTAGACAATCTCGTTGATTCTTCCCATATAGGGGCACCTGAGTGGCTCAGTGGTTGAGTGTCTGCCTTTGGCTCAGGTCGTGTTCCTAGGGTGCTGGGATCAAGTCCCACATTAGGCTCCCTACATGGAGCCTGCTTCTCCCTCTGCCTGTCTCAGCCTCTGCCTCTGTATCTCTCATGAAAAAAATAAATAAAATCTTAAAGAAAAAAAAATCTGCTTACAGGGAAACTTTAACATAAAACCAATCGAGCATATGTTCCCC…	AGATTTTAATCTGTAAACAGATTTTAATCCAAATTAAGATCCTCCGTGTTAGACACAAACTCTTCAAATCATGTCTTATCCTCCCTTCAGTTTACCATACTTCCTGAAATTATCCTCTCTTCCTTAATCATCACTACATTGCATAAATGA
CLPX	30:29515907-29560318	CLPXL1	13:23886259-23886275	NA	NA
CLRN2	3:62958242-62967878	CLRN2L1	7:32430321-32430338	AAGTCTCTACCTAGACCGCCTTCACCTGACTCCAAATTTTAAATCTTTTCATACAAGTTACAATCTATGGCCATACCACCCTGAACACCCAATCTCGTCATACAAATTACATATTTTCTTCTTATTTATTCTTAGAGCAACTATTAGGTGTGTGGCTTCAACCAAGACATTGACTCTTAATTTAGTCTTTTAAAAGCAATATATCAGCCCCTGAAATGCAAGCTTTAA	TCTCTCTCAAATAAATAAATAAAATCTTTTTTAAGAAAAAAAAAAAAAAAAGATTTAAAATTTGTTATTTGCATCTAAAAATCATAGTGCAAAAGAAACTTTGAGAATTTATTAAATTTTGAAAGCAATAGAGGATAGAAAAACCTCAAAGACATCTTCTCTGTTTTTAATTAACACCTAGTGTGAGCACAAAAATTATTTTAATGGTTAAACACAATTTATT
CLTC	9:34116344-34183023	CLTCL1	7:18940978-18940993	CAGCGCAGACTCCGGAAACGGCTGAGTTCATATATTTCTGATGGTGGTTATCTTGTCTTCTCTTTTGTCTGATCAGTCTGGCAAAAGTCTATCAAACTTTAAAATTTATTTTAA	TAAATTTATTGACAAAGATATTTATAATATTTCCTTATGATTTTGTCTGGAGAATCAGAAAGCATGCCAGTTCATATATTTCTTTTTTTTTTTTTTTTTTTTTTTTTTTTT
CMPK1	15:13324235-13357387	CMPK1L1	1:116654200-116654218	NA	NA
CMPK1	15:13324235-13357387	CMPK1L2	22:7886088-7886107	TTATTACAACTTATACAAAGTTGTGTGACAGGGCATCTTCTTTGCTTCCAGGGATTGGGTTGGGGTCACTGGGGGTTCAGAGCCTGGCAGAGTTGTCAGCTTTATTCTGACATAAGTCTGAGGGTAAGAGGCAAGGATCACATCTAATGACATGTGTTCCTATGCTCTATTATATAGTGTTATTAATGATTAAACTGATCTTAACAGAATTCCTAGCAGTGGAACCTTGAAGTGCATGTATTAGGTTTATGGTAAATGATTTGGTTAGCATTTTAGTAACACTTCATTCAGAGTGTTTTTGTTTGTTTTTTAGACTAAATGTAGGGTTGGTATGAAGTAAAAAACATCTAGTGGTTAATTTCCCATTCGTGTTTTATTTTCTTGAATCCTTCTTTTTTT…	CAGATCCTGCTGAGGGAGCCAGGCCCCTCACTTTAGAATCTGGAGCAGTTGGTGCCTAGTATCTCAGAGCCTTAGCCAATGTGAGCAGGAATCTCATTGCAGTTTTCTGTTAATAATATACCTAAAATGGCTCAGCAGCCACGGCGGCGGGGCGGCGGCGGGCGCCAACTGGGCCCGCCCCCCTGCCCCCCCCCCCCGCCCCGCGCC
CNBP	20:2860915-2929307	CNBPL1	32:8865676-8865693	CATGGCATTGGATTTGACAATGATTTATTGGAGATGTCACCAAAAGCACAGGCAACAAAAGAAAAAAAAATGAATTTCATCCAAATTATAAATTTTCATGCATCAAAGGATCAGATTAACAGAGTGAGAAGACAGCCTACAGAATTAAGAAAATATGTGCAAGGACCCTGAAAATAAACAGCCGCTACCTTGTGAGCCGCCTTCCCCGGGCCCAATGGCCAGATCGTCCACCCTTGAAACACTCATTGCTGCTCATGGTTGCAGAGGTTTCCAGT	NA
CNIH1	8:30365010-30379356	CNIH1L1	5:1040270-1040284	NA	NA
CNIH1	8:30365010-30379356	CNIH1L2	12:11213091-11213101	NA	NA
CNIH1	8:30365010-30379356	CNIH1L3	16:43062747-43062761	AAAAACCCCAAACCTTTCCCCCCCCCTCCCAAAAAAAAAAAAAAAAAAAAAAAAAAAAGTCCCAAATACATACAAATAAGTGTATAAATTATTAAGAATGCACTTTAGCTTTCTCCGCTGGCAGCGGTGCCGCTCCCTGCTCCTCTCTG	TCATTAGTTTCTTGTCAGAGTTGGGGGAATACCTCTCTGCCCTTGTCTGCCTGCTTAACATTCAAAATAGTTGAACTAATTTGGCAACCACATAATTATTATTCATTGCCCATGAGGAAATTCAAATGCAGCATACAGCTCTGCCTCTTACTCCTCTCTACCACCAAAAAAAAAAAAAAAAAAAAAGCCCCAAAAAAAAAAAAAAAGATGAAAAAATTTTTAAGAA
CNN3	6:54378031-54405009	CNN3L1	9:33126786-33126801	NA	NA
CNOT10	23:3984505-4053361	CNOT10L1	22:8159603-8159614	NA	NA
CNOT7	16:40554214-40571838	CNOT7L1	25:35432762-35432771	NA	NA
CNOT8	4:54935476-54956000	CNOT8L1	7:63838171-63838187	CCATCACCACAGAATGGTTAAGTAAATATTGGTACTTTTATCCAACTGAATACAATATGGCCATTTTTTAGAATGGCAAGTCAAAATGTATGAATATGGGCCCGCTCGGTTCCCGGAGCAGATCCGGGGCAGGAGGAGAGCGCCGG	AAAAAAAAAAAAAAAAAAAAAAAAAAAAAAAAAAACAAAATGTATGAATATAAAACTAAACATCTGTAGGATATGTTGTAGTTGAAAAACGAGCAAAGAGCACTTCGAGCTATATACATAGGATGTTTCCTT
COA5	10:44073218-44080346	COA5L1	29:37314657-37314672	AAGGTCACATGCAATTAGATGGTCGAGCTAAGGTAAAATATGCATCTCTCTAATGCAGAAACTTACTCTATGGCTGCATCATCGTGCCTCTCCTTAGTATTGTTTATCTCAGATTGACTGTAAATACAAACTCTCCTCTGTATTTTAACAGACATTAAGATGTAGGTGACAGGGGTGTCCGTTGCGCCCCACAGGGGTTGCTGCGGCTGCGGACGCCAGCG	TATGCTTTCCTCCAAAATTTGTGCCTCATGTATATTCTTGTATGTATATTTCCAAAACTGATTCTAGTCATTTTGTCACCTACATCTTTTTTTTTTTTTTTTT
COA5	10:44073218-44080346	COA5L2	36:16827584-16827596	ACCCGCTGGCGTCCGCAGCCGCAGCAACCCCTGTGGGGCGCAACGGACCACGATTTTTTTTTTTTTAGAGAGAGAGAGCGTGTACATAAGCAGGAGGGGCGCAGTGGGGAGGGCAAAGGAATCTCTAAGCAGACTCCATGCTTAGTGTGGAGCCTGACCCAGGGCTTGATCCCACAACCCTGAGATCACG	CCCTCTGAAGTTAAAGCATTTGGCCTCTGGTCTGTCCGCTGGTTCTCAAACACTGCCTTTATATTATGCCTGTTTCTCTTTGTTCATATAGGTATTAATCTTAAAATATTCAATGTTTTTTATTTTTTAACGATTTTTTTTTTTTTTTTTTTTTTTTTTTTTTTTTTTTTTTTATTTTTTTTTTATTAAATTTTTGTCTGCATTTAAATATATTTATTA
COA5	10:44073218-44080346	COA5L3	X:72421161-72421178	GTCCGCAGCCGCAGCAACCCCTGTGGGGCGCAACGGACACCCGCCACAATCCTAAAATTTCTAATGAACTACAAAAGAACCTGAATAGCCAAAGTAATCTTGAAACAGAAAAGCAAAACTGGAGTATCACAATTATGGACTTCAAGCTATATTACAAAGGTGTTGTCATCAAGACAGTAGGGTACTGGCACAAAAACAGAAACATGGATCAATAGAACAGAATAGAAAACCCAGAAATG	ATTTTTTTTTTATTTCCTGGAAAAAAAAAAAAAAAAAAAAAAAAAAAAAAAAAAAAAGAAATTTTAGGATTGTTCATTCTAACTCCATGAAAAATGATGGTGGTATTTTGATAGGGGTGACATTAAATATGTAGATTGCTTTTAGTAGTATAT
COBLL1	36:9885781-10045104	COBLL1L1	1:83866508-83866569	NA	NA
COIL	9:31745456-31762289	COILL1	23:32536826-32536843	NA	NA
COIL	9:31745456-31762289	COILL2	32:11410796-11410812	AACCGTCTCGGAGGCCGCCATCTTGCCCGGTGCTCAACGGAAGCCTTGTTTATTTTTCTTAATGAAGGAATTAATCAATAAGTAAGCCTTTCCAGGACTTCTTTTAAATGCAAGTAACTCAACTAGGTAATGAAGAACATAAGAAATAGGACTCATGCAGTCAAACATGTACGGCCTGTTGAGAGGTAGGATGTGTGTGTCTATTTGTGTATTTATG	AAAAAAAAAAAAAAAAAAAAAAAAAAAAAAGAAAAATAAACAAACTAAAGAGCATTTTGAATAGTATAAATACTGGAAAAGTAAAGGGGAGATTGAGGAGGAATCATCTCTTTAGGAGATTTGGGAAGCCCCGTTCCTTTTGGGGCACAGTATCATTGTCGTACGCAGTTACTAGCTGTGATAAAAAATATTCTGTCGCTGTTTAGGG
COL25A1	32:29119875-29567994	COL25A1L1	11:27472584-27472598	NA	NA
COMMD7	24:22035590-22057799	COMMD7L1	27:43163043-43163050	NA	NA
COPB2	23:35536520-35604708	COPB2L1	8:38330135-38330151	AAGCCAAAAAAAAAGTATATAAAATGAAATGATGGAAAATAGTCAATAAATCCAAACAAAGACTAAAAAGGGGTAAAAAAGAAACAAAGAGCAGATGAGAAAAGCAGAAAACAAATAGGAAGGTTGTAGATTTAAACATAACCATATTGCCACGTCAGTCAGTCGGCTGGGCTGCGGGTCGCTGGGTCTCTCGGGGT	ATAAAATAAAATAAAAAAAATAAAAAAAATAAAAAAAAAAAAATAAATAAAATAAACATAACCATATTAATAAATACTTTAAATACAAATGGTCTAAACAATGCAATTAAAAGACAGAGATCATCACACTGGGGGTGCCTGT
COPS3	5:42143397-42169509	COPS3L1	11:24498006-24498028	AAAGAAGGAAAGGTTTTGGTTCAAATAATGCAGATTCTAGAATTTGAACTCAGCATATTTGTAATAAAAAGAACAATTCAGAAAGATAGGGAGGGAAGCATGTAAACCTTGTATGTGCCAAACTTTTATGTCTATATAGCAGTCACAAATAGGATGAATTTCAAAATGAAATCCTGTCTTATAGGATAGCCGCGGCCCCTCCTCCCAGAGCAGCCGCCTTTTCCCGCGTGAGCTGCCTCTGCTGCTTGGGCCGCCGCGGGGAAATATGGCGTCTGCCCTGGAGCAATTCGTGAACAGTGTCCGACAGCTCTCGGCTCAAGGGCAAATGACTCAGCTTTGTGAACTGATCAACAAGAGTGGGGACCTCCTTGCAAAGAACTTATCCCATCAGGACACCGT…	TTTTTTTTAAAAAAAAAAAAAAAAAAAAAAAAAAAAAAGAAATCCTGTCTTATAGCTTCTTCACCTACTTTGTTTTGTCTCAGCCCCCATGCATTTAAGACATTCAGTGCAGGCAATAGTTCTAGTCCTAGAATCAGAATTTTAATTCAGGCACAAGACCCCATGTCTCTGATTTCTCATGTAGTTCCCATGACTACATGACT
COPS3	5:42143397-42169509	COPS3L2	14:36495214-36495228	CCAAGCAGCAGAGGCAGCTCACGCGGGAAAAGGCGGCTGCTCTCTGTCTTTTTTCTGTATGTCAGTTTGTAAAGACTAGAAAGGTCTTGCTAAGGTAAACAGGAAGCACCAGACTTTGATGGAATCACTCTTAAGAAACACACCACATTGGCTCATTAGTCAGGCTCAGCCACACATTGTCATTGATGTGAATTCGTTATTTAAAATGATCT	TTCTTATACAGTCTCCCAGAGATATTCCACATATACAGGAGCATGTGTGGGTTGACAAAAGGATTCCCCTTACCTGAGGCATATTTGTCTTTTTTCTTTTTTTTTTTTTTTTCTTTTTTTTTTTTAATGTTTGAATTTTTTTCCTTTCTTTG
COPS3	5:42143397-42169509	COPS3L3	14:37264585-37264597	GCCCAAGCAGCAGAGGCAGCTCACGCGGGAAAAGGCGGCTGCTCTCTGTCTTTTTTCTGTATGTCAGTTTGTAAAGACTAGAAAGGTCTTGCTAAGGTAAACAGGAAGCACCAGACTTTGATGGAATCACTCTTAAGAAACACACCACATTGGCTCATTAGTCAGGCTCAGCCACACATTGTCATTGATGTGAATTCGTTATTTAAAATGATCTTTCTG	AAAAAAAAGAAAAAAAAAAAAAAGAAAAAAGACAAATATGCCTCAGGTAAGGGGAATCCTTTTGTCAACCCACACATGCTCCTGTATATGTGGAATATCTCTGGGAGACTGTATAAGAAGTTGGCATTCGGTGGATGCCTCTGGGTGGGGGGAATTCATGACTTCGGGCC
COPS5	29:16562234-16579082	COPS5L1	19:50496706-50496722	NA	NA
COPS6	6:9500715-9503481	COPS6L1	4:73449590-73449606	TTAATCTTACACAAAAAAGAATAACCACATCTTAACATCACTAGAAAAATCAAAGTGATCCAGAAAAAACAGAATTCTGAAATCTTAATAGCAACAATAGAATGTTTAATTATAAACAAGTCCCCCAAAGGAGTCACCTTTGTATATACAATAGCTTTTATTTTTATTTATATACAATAGCTTTTAAAAGTTCAACGACTACATAGTTTTAAGAATAAAATTTATCGGGGGAGGGGGCGGGGCCGAGGCTGGCGGGCGCGGGGAAAATGGCGGCGGCGGCGAACGGGACTGGAGGGAGCAGCGGGATGGAGGTGGATGCGGCAGTAGTCCCCAGCGTGATGGCCTCCGGCGTGACGGGGAGCGTCTCCGTCGCT	AAAAAAAAAAAAAAAAAAAAAAAAAAAAAAAAAAAAAAAAAAAAAAAAAAAAAAAAGAATAAAATTTATCTTCTTTTTCCACTGATTAGATAAGTAATGTTTACTGTAGAGAGAAAGAGAGAGAGAGAAAGAAAAGAAAAAAAGAAAAAAGAAAAGAAAAGAAAAGAAAA
COPS7B	25:43637170-43663218	COPS7BL1	12:48569474-48569546	NA	NA
COPS7B	25:43637170-43663218	COPS7BL2	26:17856196-17856211	ATATTTCCGGCTTTAAGACCTTATGGTCTCTGTCACTACTCAGCTCTGCCCCAGCAGCCACAGAGAATCCATAATTAAATGGATCTGACTGTATTCCAGTCACGCTTTATTTATGGGCATTGATGTTTGAAATTCATGTAATTTTCATGTGTCGCAAAATAAGATTCTTTCAACCATTTAAAAATGTAAAAGTGGATCATGGACGCTTGACACCCTGCGGACAGGCGCCGGGAGGCCGAGCCAGCGACCGAGAGGACGGAGAGGAGATCTCAAGGCCAGAGAATGGCAGGTGAACAGAAACCCTCAAGTAACCTCCTGGAACAGTTTATTTTACTAGCCAAAGGTACCAGTGGCTCAGCCCTCACTGCTCTCATAAGCCAAGTCTTGGAAGCTCCTGGA…	TACAGGTTCTGATTCTAATACATTTCAACATGCTTTTTTTCAAAAAAAATAAAATAAAATAAAATAAAATAAAAATGTAAAAGTCATTATTAGCTTGTGGGATGTACAAAAGCAGGTGGCACCCAGGATTTGGGTTTTGGACCTGAGCTTAATGACTTCTGGCCTTGCCAAAGTGGCCATCCCGGGAAGCGCTGACAGCATGGGTGGCCCAAGAAATTTCCAAGGGTCCAGTCCATTTGTC
COQ2	32:7143476-7162765	COQ2L1	11:70353061-70353061	NA	NA
COQ4	9:55182919-55194048	COQ4L1	5:33126646-33126661	GTAGACTGGGAAAATTTCACAGCTGCAAATACAAGCTGCCTTTCATGGAAAGAAGGATGACTCAGAAAGTAGCACCAAAGGCCTCACAGGCGGAGCAGTGGAGGATATACAAATGCCCTATAGGCACAGGAGATGTATCTTGGGAAAATGTGTTAGGAGAATTAAAATCAAAACCACAATGAGGCCGGAAGTGAAGGGAAATGGGGAGAGTTTTGCTTCGGTGGAAGCAGGT	CCCCTGGCCAACAGTTTTTTTTTTTTTTTGTCCATTTTTTAAATTTTTGCCATCTTAGTAGAGGTGAAGTGGTATCTCATTGTGGTTTTGTTTTTTTTTTTTTTTTTTTTTTTTTTTTTTTTTTTTTTTTTTTTT
COQ5	26:16404370-16421507	COQ5L1	7:23158205-23158215	NA	NA
COX14	27:4609156-4614325	COX14L1	34:13907511-13907526	TTTATGAAATCCATATATCAATATACTAATTCCTTTTGAAAAGCATGGAAAATGTTGGTTAAAACAAGTCTGTTAAGTTTACAACATAACATCATTTACTCCTATAAAAATGCTACAAAACGCATCATTTTAATTTCTTTATAAACAATTTGGTCTTAAGAATGACGAAAGAAGTGGGCGGATTTGTGTTGCTACGGGCGTGTGGTGTCCTCTCTCCGGT	AAAAAAAAAAAAAAAAAAAAAAAAAAAAAAGAATGACGAAAGACCAAAGAATGACTTAACGCTTGCCTTATCCTAACCTTTAGACTAGATAATGCAATTGTTGAAAGACAAATTTTCATACCATTTTAAAGCCCAAGATGCAGACTGTTTCTTTCTTAATGCAGAAGCAAAATCATCTT
COX16	8:44006532-44032041	COX16L1	22:59860897-59860918	NA	NA
COX16	8:44006532-44032041	COX16L2	X:56417571-56417592	GACACTTTATTCATTTTCAGTTTTTTTTCTAATTCTGGATCAATTTTAATTTTCACAGCATCATAGCGGATTTGTGAAAACTCGCGAAGACCAAAAGAACCTCCAACAATCAGCAACAGCATGGGGACCCCGTAGCGCAGGGTCTTGTTCTTGCGCAGGGCGCGCAGCAGCGCGTGTACAGACATGTCAGCTTTTCCGCGCACGCGGACGCCTAGTTCAACGGGCCCAGCGCGGCCTCCCGAATCCAAGCTCCCTCCCCAGGAGGGAGACCTTGACTTCGTCTCCTTGCCCTGGCCTCCCGGCGCTCCGTCCTCCCCCACAGGATTTATTAAGAAGTGGCCTTTTCCTTTTTATCTCAATGTAAATGAAATTGTCTATCTGTTGTAGTACTTCTGGTGT…	AAAAAAAAAAAAAAAAAAAAAAAAAAAAAATCCTGTGGGTTCACAAAGGCAATTCCTTTTAAAGAAGGAAACCTTAAAATACATGCTGTCACCTTTCTGGTTTGGCTATTCATAAAGTACTCTTGCTTACAACATCTTGGGGAAACAGGAAGTTTGCATCCTTCCTTGCTCTTTAAATATTTTACTTTCCTATTAGTATAAATTTCCTAGGATAGTTTACACTT
COX18	13:61875507-61888065	COX18L1	37:17619617-17619791	NA	NA
COX4I1	5:66883730-66891734	COX4I1L1	19:13298626-13298641	CGCGACCTCCCTCCGTGCCCCGGCTGCCCGCGACCGGAAAAGCGCGAGTAAAACCCAACTTTAGAGTCACATAAATATTTAGCTCTATGGATGTTCAATAGTTTATTCAACTAGGCTGCTATGAATGGGCATTTAGATTGTTCCAAATATTTTACTATTACCAGTAATGCCACATTGAATAAACTCTTTTTTGGAGAGGAGCTGTATCTTCAGAGTAATT	AAAAAAAAAAAAAAAAAAAAAAAAAAAAAATAAAGTTGGGTTTTAATAAAAAAAAAAAAAAACTGAACCTAACTAAATATTGAATCGATAACACAATCACAGAAAGAAATAACAGAATTAAGTAAAGCATCTTTAAAATAGGGGTGCCTGGGTGGCTCAGACAGTTAAGCACCCGACTCTTGATTTCGGCTCAGGTCATGATATCAGGATTGTGAGATGGAGCC
CPSF6	10:11265044-11297395	CPSF6L1	3:37001309-37001325	CTCCAAAATATCATTCACTCCCAAAGAATGAACTGCTTCAGTTAAGTCTTCATCTGTTGTCCACCATGTTAGATTTCCAATATACAATGCAATTCTCTTTCCAGTATATGTATAGACAACATTTGGTGCTGCTCCTTTACCCACATTATCACCAACAGTTGGTGGGAGAGTGTCCATGTAATCACGGTCTTCTGGGGCATCTCCATTATTTGCAGATGGAGAGATGACATCATCATACAAATCTATCTGATCATGCCCACCATATTCAGCTTCCTGGTTGAACTCCTCGCCCACATCCGCGTAGATGTCTATGTGGTCCACGCCGTCCGCCATCTTCTCTCGGCCGAGGCCGCCGCCGCCTCCTGCAGGTCCGCCCGCCGCGGCAGCAGCAGCCTGTAT…	AAGCAATTGGAAAAAAACCGTCAAGTAAATGCTTGTTTTTATAGTAGTTTGTTCTTGTTAAAAATGTTCATATGATAATGTCTGTAAACAGCACCACTTTGATTACAATAGATGTAGTGTTGTAATAAACTGTTTAATGGGGAAAAAAAAAAAAAAAAAAAAAAAAAATAAATAAATAAATAAATTAATAATACATATTGAAATTTCTGGAGCAAACACTAATAAATGCAAAATAGTATAATTAAAAATGCAACAGAGAAATTAAAAACGCAAGGGAATATAAAATTTTGGTTAACAAAAAGAGGCAGGAAAATAGAAATAGAAGTACAAACAATGGATTGATTAA
CPT2	5:55718209-55786175	CPT2L1	10:51072620-51072635	CGGGTCACTGAGTCAGCAGGGACTCGCGTCCGCCCGCCGAGCCACTTCCCTCTTAACAGTCTTAAAGGAGGTTGTATATTCTCCTGGTCACCATGAATTTATTGTGAGAAGACTATCAGCTTTAGCTGAGAGACATATTCTAAGCACCTACTCT	ATTGTTGAAGCAGAAATAAAATTATTGCTTGGAAAAAAAAAAAAAAGACTTTGTTAAGACAATCCAGAGCCAAATGGGAAATATTAATTAGCACCTTGCATTGGACAGTTCATATTTGCACACAGGTGAAAGGGGATTGAGAAGGAGGAGGAACTCCCCACACACAAAGGTAGGAAAACTGTGACAAAATAAACACTGTACAGAAAGACTGTCAGCTTCCCAT
CREM	2:1755189-1828746	CREML1	11:33657664-33657696	NA	NA
CRK	9:45594657-45627496	CRKL1	36:26353268-26353284	NA	NA
CRPPA	14:30697060-30989423	CRPPAL1	38:10744207-10744224	NA	NA
CSDE1	17:52418978-52458427	CSDE1L1	6:62249442-62249457	GAATTGAACATCTCAAAACAGCAGAGACTATATTTTTGTTATTTGCTAAGCACTTTTTGTCTTCAGTAGACCGATTTTGCTGCAATTGTCCTATTCCAAGTAGCAAAATATACTTTGAAAGTAATTTTTATAGTCATACTTTCCGTTTTGTGTTATTCTATTGGGAGCTGCTTCCTGACGCCCATCCAAGTCTGAATAACATTCTAATTTTCATGATTATAAACCCATGCATGTAGATTTCATGACACAACATTTAACTTTTCTGAAACAGGAGAGAAGCGAGATTTATTCCTACGTACCGGGCCGTGCTGCTTATGGCGGCGCTGGAGAGGGGGCGCTGAGCTGTTGGGTATGAAGTGTAACAGAACAGACTTTACCACCTGAAACTTGCTGCTTCAA…	AAAAAAAATATAAAAAAAAAAAAATGTAAAAAAAAAAAAAAAAAAAAAAAAAAAAAAAAAAAAAAAAAAAAAACTTTTCTGAAACAATCCCCAACATAATAGGCATCCCAAAATGTAATCAATCTGTGATGATTTGTGAATCTCTTTGTTTTTATTTCATTATATGAACATTTGAGTAAAACCCTGATTTACATGTGTAGTATGTCTGAACCAGAAGA
CSNK1A1	4:59435530-59485591	CSNK1A1L1	22:44730973-44730991	NA	NA
CSNK1A1	4:59435530-59485591	CSNK1A1L2	35:16853890-16854037	NA	NA
CSNK2A1	24:20333593-20390341	CSNK2A1L1	23:35884025-35884038	TGCAACAAAGCGAGGCGCTTATCTCTCATCCACCTTTCATCCAAGCCTAGCGCTCCCTCACTTCCCATTTCTTTTTCTTTTTTTTTTTTTTTTTTTTTTTTTTTTT	CAATATGGCGGCGGCGGAGGAGGAGACACACGCCTCGGCCGCCAGCCGCAGGGACCAGAGCGAGGCTCCCCATTTCTTTTTCTAAAGAGGGCCTCTTTGATGTCCAGGTAAGGACACCATCACCTCTTCCAGAAAGGCTTCCCCGACTGCTCTAGCCTACAATA
CSNK2B	12:1149467-1154417	CSNK2BL1	8:59317388-59317875	NA	NA
CSTF1	24:41604988-41615988	CSTF1L1	27:1407502-1407518	NA	NA
CTDNEP1	5:32211185-32216921	CTDNEP1L1	7:52569045-52569060	NA	NA
CTNNA1	11:26273322-26459497	CTNNA1L1	3:33058787-33058972	TTGTCCATCTCTGAAGAGACTACATGAATGACCCGAGCAGACCGTCCTCATTATTAAATGGTCTTGTGGTATTTTGCCCCAAGCAGTAATGAAGATAACAGCATAATTGCGTCAATCACGT	CCTCTGCCTGTGTCTCTGCCCCCCCCCTCCCTCTCTGTGTGACTATCATAAATAAATTTTAAAAATTAAAAAAAAGTACTATTATTAAATGCAACTAAATGACT
CTNNA1	11:26273322-26459497	CTNNA1L2	3:64359510-64359510	AAAAATAAGAATAAATAAAAATACTTTAACCTACTTTTTAGACAAAACGAAGTTGAATACAACCTACCCTAAAATGGGTTAAATTAAATACAGGAAGTTTATTGAGAGCCTCATAATTCTGCCTTTTTCACACAATGCTGTTTTGGGATAAGGATGCTCCTGTCCCACTGTTCCAATGCACAGCAAGGCCAGAAAGGTCAATTAGCATATCAAACAAGTCCTAAAAGGGATTAAGCTCAGGCTAGCTGGCAGCCACTAGGGCCACCGCGCCCGCCCGCGCCTCCACCCCAGGGCTCCTGAGATCAGGCCCTGCTCCTCACTGATGTATCTGCTCAACACAACACCGTGTTAGATTCCATGGGGACATGGACAGATTTTAAACCTGGCCCGGTGGGGCAT…	AAAAATAAGAATAAATAAAAATACTTTAACCTACTTTTTAGACAAAACGAAGTTGAATACAACCTACCCTAAAATGGGTTAAATTAAATACAGGAAGTTTATTGAGAGCCTCATAATTCTGCCTTTTTCACACAATGCTGTTTTGGGATAAGGATGCTCCTGTCCCACTGTTCCAATGCACAGCAAGGCCAGAAAGGTCAATTAGCATATCAAACAAGTCCTAAAAGGGATTAAGCTCAGGCTAGCTGGCAGCCACTAGGGCCACCGCGCCCGCCCGCGCCTCCACCCCAGGGCTCCTGAGATCAGGCCCTGCTCCTCACTGATGTATCTGCTCAACACAACACCGTGTTAGATTCCATGGGGACATGGACAGATTTTAAACCTGGCCCGGTGGGGCAT…
CTNNA1	11:26273322-26459497	CTNNA1L3	24:2543918-2543934	AGACAGGAGGACGAGCGAAAATGGCACTGGCCCTCAAAAGACATCAGGAGAAGAGGAAATCCACCACCACCCCCTCTGGCCTCTGTAATTTCACCAATTCTTTTATAAGAAGTACCTAATAGTTCACATCAAAATCTTTTTGTTGGGGAGTCGGACTGGAGGGAGACAAAGCGGCGGCCGTCGGCTCCGGGCCTC	AAAACCACCAATTAAAACAAAAAAAAAAAAAAAAAAAAAAAAAAAAAAAAAATCTTTTTGTTGGTTTTATTTCCAGTTTGGTTTCTGTACAGTAAAACGCATGCTGTTCTTTTCTTTTTTAAAAGATTTTTATTTATTTATTC
CTNNBL1	24:26253884-26414940	CTNNBL1L1	5:79943082-79943098	CCCACTTTAAAAAAAGAAAGAAAAAAAAGTAAAAGAAATGCACAAGTCAACACAAGAAGAAAACTAAGAGTTGAAAGTGACTGACTCCGGCCGGAGCCGCCGCGGAGGGGCCCGCGGTTTGGCCGTGAGTGGAGGGAAGCT	AAAAAAAAAAAAAAAAAAAAAAAAAAAAAAGAAAGTCACTGACTCCACAGAGCAAGCCAATCAAGAACAAAAAGAGGTGAAGCTAGGAACTGCTGTCGCATTGTAAGTCTTGTAACACTATTTGGATCTTTAAACTATGTGCATGTATTACTTTGGTCACAAATAAAATTTAGATTCAGAAAAGGAAAAGGCTTCTCTTCAAATCAGGTCACAGGATGCCGTCCTTATTTAAT
CTSO	15:53427119-53454364	CTSOL1	1:108449490-108449506	GCAGCAGCAGCAGCAGCAGCAGCAGCAGCAAAGCAGCCAGAGGCGCCGCAGCGCCCGCAGCTCCATCCCGTTACATTCAATTTCATTAGCACATTTTCATTTCATTTCAATCAATAATTTACATTTAATTTTAATCAATGCACTGAAATTAATACACTTTAATTTAATTTTGAGAGTACAATTTAATGTAATTGTAATTAATAAGTTTTCATTTATTAATAGGCTTTTGCTTAATTAATGCATTTTAATGT	TACTAAATGTTAATTTAAATATCAGTAGGGTTTACTCCAACTGCTAAATGTTACATTCAATTTCTTTTTTTTTTTTTTTTTTTTTTTTTTTTTAAATATTATAAGGGGTTTTTTTCATAAAATTTTCAAAA
CUL1	16:1995637-2086853	CUL1L1	10:43047731-43047750	NA	NA
CUL4A	22:60624215-60667844	CUL4AL1	13:12069093-12069110	NA	NA
CUL5	5:24393692-24477595	CUL5L1	6:12812228-12812245	NA	NA
CWC22	36:23355501-23415059	CWC22L1	33:20500705-20500722	NA	NA
CWF19L2	5:24936700-25080927	CWF19L2L1	22:25980784-25980798	CTACATATTTACTCATATCATTTCCTCTAACTGGAACTCCTTCCCCAGTATCACTTCCAGAATAAATTCTAAACATGTAGCAAAGTCCTTTAAAAAGAAATGATGGGTAGAGAACAGACCAAGATGGCCAGGGCTGAGGTGTTACGTCAGGCTAAAGCCAATTTTGAAAAGGAAGAAAGGCGTAGAGAACTTAAACGACTTCGGGGTGAG	AAAAAAAAATAAAAAAAAAAAATAAATAAAAAATAAAAAGAAATGATGTTTAGGGGCACCTGGGTGGCTCAATTAAGTGTTTGCCTTTGACTTAGGTCATGAT
CYB5A	1:5070817-5106668	CYB5AL1	1:15211536-15211548	ACTAGAGGTACATTTGAGTTGTTTCCAGTTTCTTATGGTTATGAATAAAGCTGCCATGAACATCTGTATACAGATTTTTGTGTGAACGTAGGTTTTTATTTAATTTGGGCAAAAATCTAGGAATGGGATTGCAGGATTGTATGATTAAGTATATTTTTAACTTTATAAGAAATTTCCGGTCCGCTCGGGGCTGGGGCGCGGGGAATGTCCCGGGTCGAGCTCGCTGT	GGGGTGATTTTTTAAAAATATATCTGGCTTTTAAAATAAAAAAAAAAAAAAAAGAAATTTCCAAACCAATTTTTAAAGTGGCTCTACCATGTTGCATTCCCACCAGCAATGTATGAAAGTTCTAGTTGCTCAATATCCTTGTCATTATTTGATTTCATCAGTTTTTCTGATTTTAGCCATCCTCGTGGGTATGAAGTGGTATCTCATTGGAGTTTGATTTGCATTTATGTATCTT
CYB5A	1:5070817-5106668	CYB5AL2	25:27977790-27977810	TATAAAAAAAAAAATTTAAAAAACAGAAATCCTAGAGCTGAAGAATATAGTGACTGAACTAAAGAATTCAATAGAGAGCTTCAACATCAGATCAGCCAGGTAGAATAATTAATGAACTGGAAGATCAGTCATTTGAAATTACCCATTCAGAGGAACAAGAAGAAAAATGAATGAAAAAGAGTGAAGAAAGCCGCTCGGGGCTGGGGCGCGGGGAATGTCCCGGGTCGAGCTCGCTGAGACGCGCTCAGCTCCGCCCGGCTCGGCTGCTGTCTGCACGG	TTTTAAAAAAATATTTGTTTTTTAAAAAAAAAAAAAAAAAAAAAAAAAAAAAAAAAGAGTGAAGAAAGCCTATAGGACTTAGAGATACCACCAAAAGAAACAATATACACATTATGGGAATCCAGAAGGCAAAAAGGAAGAAAAAGG
CYB5A	1:5070817-5106668	CYB5AL3	31:9613881-9613897	NA	NA
CYCS	14:38579446-38581983	CYCSL1	32:24295873-24295887	AAAATCTCTCTTAACATTTAATGAACTTAAGATATTTTATTTGTAGAAGAAATGGTAAAACTTAAAGATTGAGTAGGTTAATTCTTTTACTCAAACATGTAAGTAGAATTTGGTTTTAAAAAATCTGGAAAAGAGAGCGGGACGTCCGGCTTGCGAGCGGGCTTCTTCGTTT	AAATAAAAAAAAAAAAATAAAAAATCTGGAAAGCTTATAGCAGAATTATTTACAGTAGCCAAGACATGGAAGCAGCCCAAATGTCCATTGATTGAT
DBF4	14:13983832-14019864	DBF4L1	6:65849500-65849515	NA	NA
DBI	19:30640429-30645704	DBIL1	30:767606-767620	NA	NA
DBT	6:49753233-49805493	DBTL1	10:60856474-60856487	ATATTTGAATGAAGGATAACCAAAGAAACACACATACTTTGGCTTCAAAATATGAACATTATTACATGTTTGAAAGTAGCGAACACAAATCAGCCGCCCAGCATTCCGGCTCCACGTCGCACGTTTAATTTTATAAGAAACTCCCAAATGTTTTCTAGAGTGACTGTTATCACATTATATTCCCATCA	AAAAAAAAAAAAAAAAAAAAAAAAAAAAAATTAAACGTGCAACGACCATTCAACCCAGCAGCTGCCCTCCTGGAGAAATAAAGACTAATGTCCATACAAAAACCTGCACACAAATGTTATATAACACCTTTATTTATAATAGCCAAAACCTAGAAACAACCTAGATGTCTTTCAACAGGTAAAC
DCAF13	13:4835147-4860706	DCAF13L1	16:34358077-34358096	CCTCTGCACACAGATGGTCATGGTTCAAAACGAACATTTGTCTGGGGGCAGCAGAGGAGGAGCAAAGTAGGAGAGGTCCTGAAAGAAACCCTCACATCAGCTTTCTATTAAGAAAGCCAAGTGGAGAGTCGTCCAGAAGAGGCGGAAGCGGCGTGTGCCTGCGG	TTTAAAAAAAAAAAACACTTTTTTTCTGTAAAAAAAAAAAAAAAAAAAAAAAAAAAGAAAGCCAAGTGGAGAGGGAGGGGAGGGGAGGCAATTGCTGAGGTATTTTCTTAGTATTGTCCCCCTTCCCCTGCCCCCCACCTC
DCAF15	20:48519435-48527701	DCAF15L1	38:5662731-5662751	CCCGGCCCCGCTGTTCCGCTCCGATTTCGAGCTGGGCGCCATTTTCCCAAATTAATAAAGTTTAATTGTATGTCATATATAGGCCATCTGGGTTCAAACCTAATCAAAAATTATAAATGCAGCATGTTACTAAGGCCATTAGTAGGCCAGAAAGGCTAAGAGTAGTAGGGTTTTAA	TTGCTTATTTTAAAGGAGTAGAAAGACTGACAGCTTGAAAATTTGTCTATTCTTCTAACTAATTTATAATAGGTACTATTGCAATATAGGTCAGAGTTTGAGTTATTTATAAAATCTTTTCTCTGAAAGAACAAAAGAGCAAGCTTAATTGTATACCTGAATAAGAACAAAATCTGAATTAGTATTATCCAAATTAATAAAGTTTATTTTTTTTATTTTTTTTATTTTTTATTTTTTTCAGAAATAAAACATTTATTACATGA
DCK	13:60206742-60236338	DCKL1	11:47104476-47104487	NA	NA
DCK	13:60206742-60236338	DCKL2	14:44840809-44840827	NA	NA
DCP2	4:35256772-35298974	DCP2L1	1:11193517-11193532	NA	NA
DCTN4	4:58423591-58453055	DCTN4L1	1:108654042-108654058	TGTTGCCCGAGTGGAGAGAGTATGCATACAGCCAGGACAGTCAAAGCAGTTGGCACATCTATTCTTTTTTAGTTTGGCTTCAGCTGATGGCATATTTTCTAAGCAGCTGGGACAATAATGGGAGTCCACCTCGTGAGACACACATTCCAGCGACCGCAGTTCGCTACAATAGCGGCAGAAGTACAGCTGCGACAGCGGGGCCCGGACCTTCTTCTCTCCCTGGACGAGGTAGAGCACCCTCTCTGATTGCAGCAAGGACGCCATCTTGGAGGGGGAGGACTCAACCTAACCTTCTAAGGTCTCCTTCTGGCCACCACCCCCCTTCGTCCTTGAGGAGCTGGCACTTGGTATCTTGCAGAGTGGCTGTAAAAAGGAATTCCACCTCCAGAGTGGCCCCTC…	AAAAAAAAAAAAAAAAAAAAAAAAAAAAAGAAGGTTAGGTTGACATAGGGAATTGCCACGTCATGCGTCGAAATCGGTTGCATTCTTGCAAATCTGTAGCAAGAAAGCAGTTTAGTGGTTGCCAGGGGCTGGGGGGCACGATGGGGTTT
DCTN6	16:34119908-34144689	DCTN6L1	7:60680144-60680161	CACACACAACTGCTCCAGGAGCAATCTTCACACTCTTTTGAGCCTTCTCCGCCATGGTTTGGCGCTTAAACATACTTATTTATAATGTAACTTAAGTAATAAATTATGTTTCTGATGTAAATTTTGAATTCCCTCTCGCTAAGGAACCAAGGATAACATTTGGACAGATATAGGTAAAGGAATACTTTTTTTCCCCCCCCCTCCCTTCCCCTGGCAAATTTTTTTTTTTTTTTTTTTTTAAGATTTTATTTATTCATGAGAGACACA	AAAAAAAAGTATGTTTAAGCTTATTATATGGTAAAGTATCTATGGTTCTCAACTCAATTTGTGCTCAACTAATTCTTTTATCAACCTAATAAAATACTAAGATAAAATTAAAG
DCTPP1	6:17679681-17683644	DCTPP1L1	29:18169221-18169235	TCCCACCGTGTCCCCACGCGCGTCCCCATTCGCCCGAGACATGCTGCCCGCCATAATCAGCTTTTTATCACGCACTGGGCTTTACTTTTCAAATATTGATATTATTTAATGATACGGTTTTATTCACTTCAGAAACAAAGAAACAAGGAATTTTTTCAAGAAAACCCTATTTTGTCTTTGACATTCAT	TGTCTTCTTCTTCCTGTGTTACACTATTTGTGTGGTCACTACTGTCGTGAGTGAAGTTCCAACTATACTTCTTTGGAAAGTCTATGACATCTTCCTATAATAAATAAGATATAATCAGCTTTTTTTTTTTTTTTTTTTTTTTTTTTTTTTTTTTTTTGTTTATTTTTTTTTTTTTTTTTTTTTTT
DCUN1D1	34:15962629-15998910	DCUN1D1L1	14:56803951-56803964	NA	NA
DCUN1D1	34:15962629-15998910	DCUN1D1L2	29:22855301-22855319	CTTAAGTATGTCTTCCAGTTCTTTTATTTAACCTGTGTCTCTATCACTCTGATATCAAAAGCAGTGTGGTTCATATACTAGATGCTAAATAAATGTGTTTGTATGGCTCTGTAAACAAACTTTCATTAAGTCTAAGACCAAATGACTAGAGATACGAGTACAGGTATGATGAAATTTTTCTTTATTTGGGTTTGACTGAAGATGAAGTTTACCCATTGCCAGTGCTAGAGTGTCCCAGTCTTACACAGTCTTACACTTACAACATGGAATAAGGCATTACTAAAAGGCAATGTGCCATTGGTACCAGTGGTATCTCTTTGAAAGCAGAACTGTGACTCTGCGTTTCATCTCAAAATATCCCATCCATACTCTCAGTACCATGGCCTTAGGACTGCTATA…	CAGTTCTCCTTTCAAAGAGATACCGCTGGTACCAATGGCACATTGCCTTTTAGTAATGCCTTATTCCATGTTGTAAGTGTAAGACTGTGTAAGACTGGGACACTCTAGCACTGGCAATGGGTAAACTTCATCTTCAGTCAAACCCAAATGCAGAACTATCAGCCTACATTCACG
DCUN1D2	22:60750547-60778245	DCUN1D2L1	9:13361735-13361751	NA	NA
DDA1	20:45440046-45447749	DDA1L1	21:12758337-12758354	NA	NA
DDIT4	4:22916718-22918893	DDIT4L1	36:25978733-25978745	NA	NA
DDX18	19:32014586-32030634	DDX18L1	1:2728310-2728325	AGTTTCATGGGTAGATGGGACATGGTGCCGGCCGGGCGCCCTCACTGCGGCGCCACCAAGATTCCTTTTCTTCAAACGTTTTCTGGATCAGACGTTGAGTATGGTTTCTGCACGTGACACACCCATTGCCCACACATGGCTCACTGAATTCTGACTTCTCTCTGGCCCCATAGAAAT	TTAATGAAAAAAGCATTTGTTTGTACAACATATATCCCTGGGTATACCTGTTCAGAAGATTCCTTTTCTTCACTGTGTAGCAGTGATTCGGCGTGGCAGCC
DDX18	19:32014586-32030634	DDX18L2	1:105162574-105162582	ACCCCTAGCCCCTACTTGTAAACCGCTTATTTCATAATGTGTCAATTTTCCTGTCATTAAATTAATTAAAAAAAAAAAAAAAAAAAAAGATCTAATGTATACCTGCTTATAGTTTCTCAAAAAGATAAAGAGAGTAATGGAGAAACAGTATCTAAAGACCCCAAAGCTGAAAAACTCACAACTATACACCTCAACACATTAGACTAAAACTATAAAATACTAAATG	ATATAACTGAAGGAATTCTAAAAAATGCAGCATTGGGCCAGCCCTGGTGGCTCAGCAGCTTAGCGCCACCTTCAGCCCAGGGCCTGATCCTGGAGACCCGAGATTGAGTCCCACATCAGACTCGCTGCATAGAACCTGCTTCTCCCTCTGCCTGTGTCTCTGCCTCTCTCTCTCTCTCTCTCTCAGGACTAAATTAAAAAAAAAAATGCAGCATAGAAGGAAAACCTAAAGAAGAGGTTAATAAACATATAGTGTTAAAAAGATCTAATGTAGAAGAAATTATTTCTCAAAAAATACACAAAAACAAAGGGAAATCTTGCTTTTAATCAAAGAGCAGGAGTAAAAACTGAATATTTTCGTACATAGCCATCTGGTGTTTTGTATATATACTTTTAAATT…
DDX18	19:32014586-32030634	DDX18L3	13:60735403-60735413	GCAGCGCTGCTTCGGGCCATGATTGTAAAGCGCTTATGGCATAATGTGTGATGTTTCCTGTCAGTAAATTAATTAAAACGAAAAAAAAAATAATCTAGATTAACCATTTTAATAGGGTTGTGAAAATTATCTGCTTATTATTTTAAAAACCTCAGGTATGTCTATACTTATTTGTCCCTGTTTACTATTTTTGTGTTCACTATCTTTCTATTCAGAAAAGAGAAA	AATTCTGGAATTGAGGCTATACTAGCATCCTAAAATCTATTAGGCAACTTCCTCCGCAACCATGTTTAAAATTATGTTGGTATAATGCAGGGTTATGGGTTCACTGTGAGATTTGTAGACCTTACCTGAAACTCTTTGGGTGTGAGTTAATTGCTTTGTTACCTACATTTAGGGTATCTATGTATTCTTGCATCAAATTTTGGCATCTCACATTCTGATAGAGTACATATTGTTTGTCCATTTAATCTAGATTAACCGGGAAGTGACGTCAACCTGGTAGCCGAGGGGTGGCGCCGCAGTGAGGGCGCCCGGCCAGCACCATGTCCCATCTACCCATGAAACTCCTGCGCAAGAAGATAGAGAAACGGAATCTCAAGTTGCGCCAGCGAAACCTGAAGC…
DDX18	19:32014586-32030634	DDX18L4	20:31990552-31990569	TCTAAACATAGTGAGAAGGAGAGGAGTGCTAGGTGAGAGGGCAGGTGCCAGATAACGAAGATGTCTCTGGGAGACGGGATTGAGAGTATTTGGTCGATTGGAACTGGAGCATGAGGGAAAGGTAGCCATCAAGAACGGCTCTTGGCGGCAGTGAGGGCGCCCGGCCGGCACCATGTCCC	AAAAAAAAAAAAAAAAAAAAAAAAAAAAAAGAACGGCTCTTGGCTATTCCCCCAAGAAGTGGGTGGCGCCAGATACTGAGATGGCTTTCCAACCCCTACATTCCCATTCCTGCAACCTTCCTTCAGTATAAACCAGTGATGTGCTGGTTAACAGGCTCCCTGCTCCTTTCGTGAAGAGCCCTGACTTGTAGCATTTGTGGATTTCTGGGCTGACTCTCGCCATGG
DDX18	19:32014586-32030634	DDX18L5	21:42853777-42853796	TTACTTCATGCAAGGGAAAAACCATTCAGCTAAGTAACACCTACCTGCTAATTCATTCTCCGGCAAAAATTGTTTTGCTTCCCTTTTGGACTTTGCTTCTTGCCCAAATTTTATTGTCTTCAAACCCTGGATTAGATAACCTTTCCTCTCGGAAAGGGCTCAGTCTGGGAGAATTATGTGGATTAGGAGAACCTAAAACTGATTCAAAAATCTTAGAGAACAGGAGGGGTGGCGCCGCAGTGAGGGCGCCCGGCCGGCACCATGTCCCATCTACCCATGAAACTCCTGCGCAAGAAGATAGAGAA	AAATGGGGGGTGTCATTTTTTCTTGAAAAAAAACCCCTTTGGCATTTTAAAAAAAAAAAAAAAAAAAAAAAAAAAAAAAAACAAAAATCTTAGAGAACAAATCCAGTTAAACTCAGCTCTTTTATTTTTTTATTAATTTTTTTTAAACTCAGCTCTTTTAAATGGAAGCTGT
DDX18	19:32014586-32030634	DDX18L6	22:39940117-39940130	CAATCACGTATTGAATAGATGGTGATTAGTTAAATGATAAAAATAATTAAATAAGAAAAAAAAAAAAAAAAAAAAAAAAAAAAAAAAAAAAAAAAAAATAAACTAGATGGGACATCAAGCTGTGTTTTCAATTAACTCAAAAAAATCTCTTTCCATTTGCAACAGCAAGGAGTCCCATCACAGAGGGTAATATTAGCAATCTGTTTTTCATCTTATAATTACA	ATAAATCTTCATATTATCAGTAATATATTGTACAGACTGTATATTTAGAGGTATTTGAAGATGATAAAACAACTATAATTCAAAGTTCTCTTCTACCAGTTTATCTCAATTTAAATATTAACACAGTTTATTTATTTAGTATTTTTCTATGCATTGAATTTCTGTATTTAAACTAGATGGGTATCAGAACTGAAGTCATCCTCTAGCCCCTACTTGTAAACCGCTTATTTCATAATGTGTCAATTTTCCTGTCATTAAATTAATTACATCGATAAAAAAAAAAAAAAAAAAAAAAAAAAAAAA
DDX20	17:63676146-63687503	DDX20L1	1:70329870-70329889	NA	NA
DDX21	4:20109719-20134586	DDX21L1	10:57757937-57757955	CATTACCTCAGATTATCTAGCTGTCACTCCCAACACTGGAATGTAAAGGATTAGGACATAGTATGGAGATAGTTTCACTGGGAGTTTGGATAGAAGAAAGGTCCAGTTTATGAGGTAGACTTCACAGAGTACTACTGGATGTTACCTGACAACAAGGAGCAGGGCAGGTAGCAGGTGGCAGTGGGACACATGGCAAGGAGACAGTTAAGAACTATGTTGCTGAGCAATCAAAGTTCAGAATAAGAGCTGGGACATGGCTTCCTCTCCACGCGGTGGACCTGACCGGTCGGCCCGAATTGCTTGAGGTGA	AAAAAAAAAAAAAAAGCTGGGGCATGGGTTATACAGAAAAGGGGGAAAAACTTCCTGTTTTTTATGAAAAAGGGGGAAAAAAAGGGTGTATGTAAAATGTT
DDX21	4:20109719-20134586	DDX21L2	30:8242340-8242356	NA	NA
DDX31	9:51631608-51700747	DDX31L1	8:15866486-15866501	TGGGTGGAGGTCCAGTTCATGAAAAGCATCTGAAGTAAACACCTTTTCTTGTACCTGCTTTACTACAGGTCTGTGGAGCTCTGGAATTTCAGGATTATTTTTAAATAATGATGAAGTCCTAATGCACAGTTTCTGTTCTCGGTTTCCATCAGTCACACCAACCAAAGATTTCTTCGGAGAAAACGTTTTCTGTGCCTTCCCCTTAAAAGTCCTTTGTGTTTCTTTAGCAGCAGCTTTCTTGGCTGGGAGAAATGATGTCTCATTCCTCCGTTTCGCTGGGGGAGCCTCACTGGATGCTTGGTGTTTTCTTTTGGTGGCCTCTGCTTGCCGGAGGCGAGGCGGCAGCTCGCGGCGTGCGGCGGGCCCGGCCCCGGGCGCGGCCGGCTCTGAAGCGGCGGA…	ATTTCCATAAAAAAAAAAAAAACAAAAAGAATAGTAAGGATTAAAAAAAACATAAAAAAAAATGAAAAAAAAAAAAAAAAAAAAAAAAAAAAAAATAATCCTTTTCATCTTTAAATTTTATTGCCTTTCTATCTAAAAGATACCAACTTTTACTTAAACATAACAAAAGTATCATCACAACAAAAATATTATCAATTAAAGAATATTGTGAAAAATCTAATTAGT
DDX3X	X:35759367-35775145	DDX3XL1	6:48015930-48015945	CTCTGCTGAGTGAGTTAGAATCACCGCGAAGGCCCTCTCACGGGAGAACTGCGGCTCTCTTTCAGCTCTATTTTAAAGGGCATGAACAAAGAATGAACAGACGCTCATGTAAAGGATTAAGTTGAATTGATAATGTATAGTAATTTATAAAGGATTAAAT	AACACACCAACTGTGTGTATTACTTTGTATTATTTTTCAAGCATGATGAAAATAGTCAACAATTTAAATATGCGAGGTGATACACAGATTTCAGCTCTATTTTTTTTTTTTTTTTTTTTTTTTTTTTCTGTTCTAATTTTTTTT
DDX3X	X:35759367-35775145	DDX3XL2	14:18822723-18822740	GGTAGAATCGCCGCGAAGGCCCTCTCACGGGAGAACTGCGGCTCTCATTTCTATTTTTTGTACTAGTTAAGACCTCTGGTAGAATTTTGAATAGAAGTGGTGACAAGGGGTGTCTTTATTGTATAGTGCTTTGTCATTAGGTATGATATG	TGTGAATAATGATGGTTTTGTGTATTCATTTCTATTTTCTGTGTGGGAAC
DDX43	12:35483428-35499696	DDX43L1	5:22965835-22965849	CAGTCTAATGAGTTTACAGACATATTCACCCATAGAAGAGAAGCTATACTTGAGAACCAGTTAGAACATATAGTTTAGCAAAGAATGAAACCCATCTTGTGAACAAAGGTAACAAAATGCTTCATCCTGAAATCTTTCAACAAGTCTCATGTAACAGAAGGTACAGTGCTCTCTAGAAAAAGTAGGAGAGGCGGGCCCGGAGCGGAGCGACGTCGGACACGCCGGATCTTCCTTCGGAACCATGTCGAGACAAGAAGCA	AAAAAAAAAAAAAAAAAAAAAAAAAAAAAGAAAAAGTAGGAGAAACTAAGTAATTCAGATACGTTGTCCTGATATGAGAAATAACTCTTATACATCAGTGGAAACCTGTATTTCACATTTTTAATATATCTACATTTACTAAAGATAGTATTCCCAAGTTTGAGGTTGTCCAATAAGATCTGCCATGTTCTGGATTTTTCTCAAGAAATAGAAA
DDX43	12:35483428-35499696	DDX43L2	11:14397027-14397041	NA	NA
DDX43	12:35483428-35499696	DDX43L3	28:17846707-17846724	CTCCGGGCCCGCACCTCTCCACCGTGCCGTCGTGCCTTTCTCAAATTAACACATTTTAAATTAACTCTGTGTTTACCTCCTCCGATAGTTCACCAGATTGTGATTGTTCAAAAGCAGAGAGCATATGTTATTCTCCGTTGTATTTATTGCACAGCACCTTGCAAATGGGCCCTGAAAAAACAAAGAATCCTAGTCTATTCATCTACCTTTTCA	CCAACCCTCCACCTCTGCCAAGTTACTTTCCCCTCAAAGATCAAGGCTGATGCTCTTAAGGGACCTCTCCTTAACACGTTCACAAACCAGCTCTACCTCCTGTGTTCATATAGCACCACTGATGGACCTCTGTTACCCAAATTAACACATTTTATTTTATTTTATTTTATTTTATTTTAT
DDX50	4:20073013-20102622	DDX50L1	6:52383271-52383286	ATTTTAGGGGTAAAGTTGAAGAGTGTATCTACTGAAAGGAAGCCAAGACTCTACATTATTATCATCATAGCCTGTGAATTATTACTTAATGCCCATTTTGCTCACAGGATACTTTATACACCATAAAGTTAAGGTAATCTTTGCTTTAGAAGCTTATACTTTGCTTTTCACGCTGCTGCCGCCCGTAGGTGGTTGTGGCCACCCAGCCCAGAAAGAGGCGGCGGCGGCGAATGATGCCTGGGAAACTCCTCTGGGGGGACATTATGGAGCTGGAGGCACCCTTGGAGGACACCGAAAACCAAAGGAAGGAGAGGCAAAAGAGTGATAGAAGGAAATCAAGGCACCATTATGACTCAGATGAGAAATCG	AAAAAAAAAAAAAAAAAAAAAAAAAAGACGCTTATACCTTTTTATTTTTTAGAAGCTTATACTTTAAAGAATAAAGTAAAGAATAAACTTTAAGTAAAATGAACATTAGCTCAAACATATACATCTGAGTACAGGAATTTAGAACAATATGAACCAAAGTACATATACTCAGTAACATCAATAGCAATAA
DDX6	5:15001988-15034128	DDX6L1	2:21519438-21519477	NA	NA
DECR1	29:35495348-35544955	DECR1L1	X:82590424-82590440	NA	NA
DENND10	28:29325721-29369218	DENND10L1	5:69096114-69096129	NA	NA
DENND10	28:29325721-29369218	DENND10L2	5:77126112-77126122	TGTGATATAAAACCACGTTCTTCTGTACTGACCAAAGACGAAGGGATGGAGAAGTTTGCTCTCATCTGTAAGGCAGCATTTTCTCAGCAGTAAATTCCTTAAAGTAGCTGTCGTGGAAGGATAACACCACACCCACAGAACTTCTCCATTTGTGTCCTTTTCTACGGTGGAAAGATGGTCACGATCAGCCCGACTCCGAGCATCAGCTGAGTGTCCACCGCCTCAGCCGCAGCCATTTTCCTCCCAGATATTTATAACACATATGTATGACAAAGAATTTGTATCCAAAATATATAACTCCTACAAATAAGTAAGAAAAAATGCTCTAGGGATCCCTGGGTGGCTCAGTGGTTTGGCGCCTGCCTTTGGCCCAGGGCACAATCCTGGGGACCCGGGATC…	CATATTAAAATTAAGAATGTCTATTCACCATAAGACACCATTGAGAATGAAAAGACAACCTACAGAGTGGGAGAAGATATTTATTTTTTTTTTTTTTTTTTTTTTTATTTTTT
DENR	26:6700708-6715513	DENRL1	28:9230983-9230998	TGACCCTCACTAATTCCAGCTTCTTGTTTCGGTGAATTTTCTACAGTAAGTTTTGCAAACTCATTTGGAAAATTCTTCTCTAACCACTGTCGACATTTAGCAACATCAGGCATATATTCACAGTACTCTGTTGGTAATGAACAGACTCCACAGTAAAGGACTCGAAGTGGGTAGTCTGCATCTAACTTGGTATTGCCCTTCGAGTCTCCTTTGCAATCATGCCCACCGGACTCAGAAATATCAGCAGCCATCTCACAAACCGCCAGCTGAAGCAACACATGCAATTCCTCTTCCCCGGCCAGGGCCGCCAGCCCTTTTCATGATTTCCTCTGATCTTTCTTTCTGGAAGGTGTATAAGTTGGGTGCTCTCTCTCGTATTAATAATTTTAATTTCTTGTG…	AAAAAAAAAAAAAAAAAAGAAATCATGAAAAGGAAGTTACCCAAGAAACTGTATGAGAAAATTTTCCAGAACTGAAGAATCTGAGTTGCCAAATGGGAGGGGCTGAGTACCCAACACAATAGATGAAAATAAACACGCACCAAAGTACATCACCATAGATGTTTAGTACCTAAAGGATAAAGAAAAAATCCTAAATACTTCCTAGAAAACAGA
DET1	3:51725931-51765487	DET1L1	15:55494830-55494842	NA	NA
DHFR	3:26521214-26556065	DHFRL1	1:29078257-29078273	NA	NA
DHFR	3:26521214-26556065	DHFRL2	2:12078552-12078567	AGAAGAGGCAATACTGTAGTAGACAAGAATTATCTAGAGACTTATTCCTGCAACCCAAGCAAGAGGCAGGTAGGGCCTAAATTAAGGAGGTGACAAGAAAGATAAAGTACAAAGCACCATGATAGGCATATGTAAAGATGCAAAAAATAAATTGAAAAAGATGTGGATGATCTTCATCTTCATGAAGCTAGAGCGATAAAATACGTAACAAGTTAAATGCTTATCAAAACCAAACTGTGGGGCGGCGCGGGCAGCGGCTGCTTGGTGTCCGCCGCCGCCATGGTGCGCACGCTGAACTGCATCGTCGCCGTGTCCCAGAACATGGGCATCGGCAGGAACGGGGACCTGCCCTGGCCCCCGCTCAGGAATGAATTCAAGTATTTCCAAAGAATGACCACG…	TCCACGGTGTCTGTAAATGACCCTGAACTCACACACTCAGACCCACAGCGATCTTTCTCCTCTCTGAACCACAAGAGTTCTTTGTTCGATGGCACCATTAGCTGTACTGCTCATCACCACACATCACCATCCACAGTTTGGTTTTTTTTTTTTTTTTTTTTAATTTTTTTTAAAAAAGATTTTATTTATTTATTTATGAGAGACACAAGATCGGAAGAGCACACGTCTGAACTCC
DHFR	3:26521214-26556065	DHFRL3	7:22243467-22243482	TTGGAAACAGCCCAAATGACAGTCAATAAAGAAATAACCAATGAAAAAAAAAAAAAAAAAAAAAAAAAAAAAAAAGAAGGAAATTTACTTCCGATTTGAGCCTAATAAGTGGGAGATGGCTGCCGCACATCAGCCGAATGGGCAAAACCCGAGAGGAAAAGCGACTCGACGGGAGAGAGATAGCAATT	GACGATGCAGTTCAGCGTGCGCACCATGGCGGCGGCGGACACCAAGCAGCCGCTGCCCGCGCCGCGCCCCCGCCGTAAATTTCCTTCTCAAAGCTGTTTCACTCAGTCTTCCCCCATGTTCTTAGAAAACAATGATGCACTTCCCTCCATTGCAAATACCAAAAAATCTAGGAAATATTCTTATTTCTCATCCTTCCCTGCCATGATACAACATAATCACTTATTTATTGGAGATCTGCCATGTATATAGCCCTGGCTACCCACATTCTATCCTTCTCCAGTTGCTACTGATTCTACCTCCAA
DHFR	3:26521214-26556065	DHFRL4	12:18624117-18624141	ACTGTCAGGTGAGTCTTCAGGATAACATTTCACACACACACTCCTTCCTTCTTATTCATCTCAATTTTGCAGAATCTTGTTTCTAACGCTGGCTGTGTTACTTAAATGAAATCATCTCATTCTTATTTGAAAATCTAGGTTTTTTTCATCCTTCTGAAATTTAACAATAAGTGGATACAATCCAATCCGAAATAACTTTGTGGTTCTTTCAGGACAGAATTAATATAGTTCTCAGCACAGACCTCAAGGAACCCCCCCACGGAGCCCCTTTTCCTCCCCCACGCCTCGA	AATGGATGTCTCATTGTTCCTAGGAAAAAGAGTACATGACACTTTTGTCTTGTGTCATTGTAAGTTGTTAAAAAACACGGTCACATGCTCAGTCCTAATGAAAGAACCACAAAGTTATTTCGTTTTTTTTTTTTTTTTTTTTTTTTTTTTTTTTTTTAAAAAAAATTTTTTTTTTTTTTTTTT
DHFR	3:26521214-26556065	DHFRL5	34:5808951-5808967	AATAAATAAAATCTTTTTTTAAAAATAAAAAAAAAAAAAAAAATAAATATTAACAATTGAAAAGTGCTATAGACAGTGAATGATATCATCACATAGCAATGACTATTACTCCTAGAAAAAGTACCATGACAGAGTCTGTCATTTTGCAGTTCTGAGCTAAGAATGATATTTACATTGTTTGGGGTTGTTAAAATACATATATACATGCAACAGAG	CTATTCAGATAGTAGGCGCATGCAAAATTTGCAAATATTGGTCCTCTATTCTGTATGTGTCAAGTCAATGGAAAAAAGCAAAGCAAGCATTATCTTTCTCATTGAAGCTTCCACATCTAAATATTAACAATTGGGGGCGGGGCGTCGCGGCTACGCGCCGAGCGGGGCGGGCGGGGGCGCG
DHFR	3:26521214-26556065	DHFRL6	37:14881321-14881336	CTGTGTGACTATCATAAATAAATAAAAAAAATTAAAAAAAAAATAAATGATTAGGAACAGATATGTTGGTGACAGTAGCAGAGTAAGGGTGGTTTAAGTATAAAAACTGAGATCTCAATTCTATATTAACTGA	ACATCATTAAGGTGTTCTATTAAGTATGTCATAGGATTAAGCAGGGGCAAAAGGTATGGGCAGAAATTGCTTTTAAATGATTAGGAACAGGGGACCCCTGAGGAGGTG
DIDO1	24:46691117-46735117	DIDO1L1	32:25815833-25815849	GAAAACCTGCCCAAACACCAAAAGCTCGGTTGGGCAACTTTTCCGGAGGTCCAAACACCTGACAGATAAGATCGCTTGGTCCACGAACACAGCTGTTGTCCGTCACTGCTCACAGGTAACAACAAAGATCATCTCAAGACTGTTCCTGTAGAGTAAGCTCCTTCGCCTCCGGCTCAGCCTAGATGTCGCCATCGCGGCGCGAAGTTCCCCCACAACGACACCTCGACGGCGGCCATCTTGCCCGGGGTCGGCCGACGCCTTTTGACTCTCGCGCCAACCCGTAGAGCGAGGGCGCCCGCATGTGGAAATTTTAATTACAAGTTACACTTTAACCACCAAATTGGAATTATAAAATTGCAAAATTCATCAGAAAGAATTAGGTATGATCATGACAGGAAA…	ACAAAGTTATATTTATAGGGTAATCACCTAACTGCTAGATGAGTAAAAGTTGGTATGAAAAGCATGTGGAAATTTTATTTTTTTTTTTTTTTTTTTTTTTTTTTTTTTTTGATATACCTCACCTT
DLD	18:12703340-12734408	DLDL1	3:88596369-88596383	TCTCCCTCTGCCTGTGTCTCTGCCTCTCTCTCTCTGTGACTTGGCCAGGGAGCAGTACACGCGACTCCAGCTCTGCATCTCGCCGCCCCGCTTCCCCCTCCGCCGACGCCTCCCCGTCCGCTAAGCGCCTCCGCCGTCTCGCCCCCAATGCTTTTAAAACAGATTGTCTTCTTACTGACAAAGTGTATATGGTCTCTGTCATCATATTAAAATTTATTTAAAAAATTTATTTAGTGTGTTTTGGCGT	AAAAAAAAAAAAAAAAAAAAAAAAAAATAAAAGCATTGGGATTTTTTTGTTAATTTTTAAAACATATTTTTATTAATAAGTAGCAATATAGGTATTTTCCCAGGTAGAGAAAGTGACAGTCCTAACATTGTCCCTTTTAGGTTTCGTTCTTATAGTGGCAGAGTAGATATCATCTTAAAACAAGCTTCAGTAACATATATATTTCATCTTTAATAGATTA
DNAI4	5:43590200-43690293	DNAI4L1	1:45084116-45084130	TGAATTTGGAACATATTTCCTGTTATCTTTAAATTTATATATTAAAAGAACTGAGAAAAAATTTAGATTAAAAAAAGTAATGGAGTAAGACACAAAAGAAATAGAGTGATAAATAGAGCAATAAAATCAGCAGAAATTATTCCTATATCAAGAAGTGAATTGCGGCGTTTGAAGCGAACTACAGCTAGCAGCAGCAAAAAAGGAGGGGAAATGGAAAAAAAAGGTGAAGCTCTGATATCTCGGCAGGCTCCTGGAATGTGTTTTGCTTTTCATCCTAAGGATACAAATATCTATTTGGCTGG	AAAAAAAAAAAAAAAAAAAAAAAAAAGAAGTGAATTGCAACCAAAAATTTCATCATATTGAATGCAGTAATTTATTAACAGAAATAAATAAATTGAGTAGAAGTAATGAATAGGCTCCTGGATTGTTTGATAACCCAATTAATAGAAAGGAGTGAATCATATAAATACATTGGAAAAAATTAAATATCTTGATTACTTGACACGAA
DNAJB1	20:48120604-48131091	DNAJB1L1	1:33156318-33156343	AAAGAGGTACCATTAGCACCACCGCTGCTGCCACCACTGGGGCCACCACCCTTTAGGCCTTCTTCCCCGTAGCGGTCAAAGATCTCGCGCTTGCGCGGGTCGCTGAGCACGTCGTAGGCCTCGGCGATCTCCTTGAACTTCTCCTCGGCGCCGGGCTCCTTGTTCTTGTCCGGGTGGTAGCGTAGCGCCTGGCGGCGGTAAGCCCGCTTGATTTCCTCGTCCGACGCGCCGCGGGCTAGGCCCAGCGTCTGGTAATAGTCCTTGCCCATAGCCCCCGCCTGCGGCCCGCCGCCCAGCTGTCGCCGTACCCCGCAAATGTATTATTTCTTAATTTAATCTTAAATTTCCCAGATTTCAGTTGTTGGGGTATTTAAAATGTCATAATGTTTTTATATTTAA…	AACAACCGAGAGATAGGGAGTGGCACCTGAAAGACGCACACAGCCAAATAGAACACAGAAGAGACAAATCTAAAAAAAAAAAAAAACAAAAAAAACAAAAAAAAAAAAAGAAACAATACATTTGAGGGGTGCCTAGGTAGCTCAGTTGGTTAAGCATCTGCCTTCAGCTCAGATCATGATCTTGGGGTCCTGGGATCAAGCCCCACATCTAGCTCACTGCTTGGTAGGCAGTCTGCTTCTCTGTCTCCCTCTTCTCACCCCTCCTCCCTGCCCCTCGTGTTTGCTCTCTCTCTCACTCTGTCTCTCTCTTTTAAATAAATAAATAAAATCTTTTTTTTTTTTTTTTTAAAGAAAGAAATAGTACATTTGATTAACTCCTGGAAAGACTGAAGA
DNAJC14	10:206477-213304	DNAJC14L1	34:9885779-9885791	CCTGGGGGTACTTGAAAGATCCGGCTCAAGAAATCCTGAAGGTCAGCAGGAGGGGCATCTGGGGTTGCTCTCTGCCGCCCACTTTGAGAGGTGGGCTCCTCCTCTGGATTTGTGTGCCCATAGGGCACATCCACTGCACACACAGCAGGTTCCAGGCACACTTGTTGACCTCTTTTTGGGCTTATTCATCTGTGAACATGGGTGAGTGGGATTGAAAGCTGGGGTCG	GAAACTTTTTGCCCTCCCCCAGAGGAAATGTCCTTCTGCAAACCGAAGCAGCTCACTTTGAGAGGTGGGCTCCTCCTCTGGATTTGTGGTTGAGAAGACCTTTCGAGGCCCTGAAAC
DNAJC15	22:7746726-7825635	DNAJC15L1	1:70891954-70891968	CAGAGGAAGACACAGACATGGCCAACAAGCACATGAGAAAATTTTCCACATCACTTGCCATCAGGGAAATCCACATCAAAACCACCATGAGCCCCGTCGCGCATGGCTGCCCGCGGTGGTGTCGCCGC	GGCGGGGGGGAGGGGGAGAGGTGGGGGGGGTGAGAGGGAATGGGGGACGGGCCCTGGGGGTTAATATGTATGTTAGCAAAAGAAACCCCAAAAAAAAAAAAAAAAAACCACCATGAGATACCACCTCACACCAGCGAGAATGGGGAAAATTAACAAGGGAGGAAACCACAAATGTTGGAGAGGATGTG
DNAJC17	30:7904519-7945222	DNAJC17L1	19:3278408-3278426	NA	NA
DNAJC19	34:14199507-14204736	DNAJC19L1	2:2261694-2261712	ATGAACTAACAAGAACTTAAAATTCATCACACATTTACTTCATTTTTTAGCTTGACCTTCTAGTAAATCTTTAGCTTCATTGATTTTGGCTGCTATATAAGGAGATCCTCCCTTGTCTGGGTGATTTAAAAGCATAATTCGTCGATGAGCATCTCTTATTTTTCCTTTATTGGCAGTAGGGCTTACGCCTAGTATTAGTGCTGCTTCTCTTTTTGTCATTTTGGGTTCAAATCCACCTCTATAATAGCCACCACTGAAGGCAGATTTTGGTAGACTCTGAAAAACTTGTTTTACTTGAGGTTCCACATGTTTCATGGCTTGCAAAACATAACGGCCTGCAAATCCCGCAGCAGCAATGGTCAGTCCAACAGCTACCACGGTACTGGCCATGGCTCCGGC…	AAAAAAAAAAAAAAAAAAAAACAAGGTGCAGCAAACCAAGGAACCAAGCCATGGTCTACAACTAATATGATAAGTGAAAGAGTGAGAGACCTGTCCCCTCCTCTGTTTCCCTGACTCCAGGTGGTCCTAGACAGGCCAAGTCT
DNAJC19	34:14199507-14204736	DNAJC19L2	7:10178224-10178239	AGTTCCTGTCTAGGGGGAAAGCCCCTCGGCAGTGCTGTAAGTGTGCGATGACTTGGCACAGCTTCCTCCGTGCCCGCCCATCACTAGAAACAGTTGCAAATCAGAAATGAGCTCCCCAAGAGAGTCAAATTCTGACTACTAGTCAGCTTTAACTTCAAACAGGGAAATATGGCTTTGGGCTGGGATGAGCCGCGCTCTCGGTGGAGGCCGCGGAGCCG	AAAAAAAAAAAAAAAAAAAAAAAAAAAAAACAGGGAAATATGTATATATAACATTTTTTTCTTTTATTTAGTATCAGTAATCATTTTATCTAAAACATATGAGGGCTTATAGCCTTAATATCGTTTAGACAAGTTGAGTCA
DNAJC19	34:14199507-14204736	DNAJC19L3	11:60128308-60128321	CAAGATGTCCACTTTCAAACATATACATGTAGAGCCTACTTTTACTTTCATTAACATAAATTACCAAAAAGTGAATGAACTTTTTTCTCTGTGAAAAAGATGGGAAGGGCGTCCGCCGCCGGCGGGGGCCGCTTGGCCGTCGGGTAGAAGCGTGCGAGCTGGCTGCGG	TGTTTGCGAACAAGATGGGAAGAAAATTTCTTATATCTGTGGAAGATTTGGCAAGGTAATTAATTTGTAGTTGCATTTGACTTAGAACTGTTAAATGATCCAATACCCCT
DNAJC19	34:14199507-14204736	DNAJC19L4	21:39631317-39631334	AAATATTGAAGTCAGAGATGCCTGGGTGGCTCAGTGGCTGAGGGTCTGCCTCTAGCTCAGGGCGTGATTCCTGGATCCTGGGATCAAGTCCCACATTGGGCTCCCTGCATGTAGCCCGCTTCTCCCTCCGCCTATGTCTCTGCCTCTCTGTGTGTGTCTCTTATGAATAAATAAACAAATTCGCCTGACGCGCCGCTGGCGGGGCGGTTTGCGTCCGCCGCCGGCGGGGGCCGCTTGGCCGTCGGGTAGAAGCGTGCGAGCTGGCTGCGGCCTTTGGGCTGGGATGAGCCGCGCTCTCGGTGGAGGCCGCGGAGCCGAGCCGGAGCCATGGCCAGTACCGTGGTAGCTGTTGGACTGACCATTGCTGCTGCGGGATTTGCAGGCCGTTATGTTTTGCAA…	AAAAAAAAAAAAAAAAAAAAAAAAAAAAAACAAATTCTTCAAAAAACAAAAATATACCTCACCTATCCAATGCCATAACTTAGGGAGCCTACCTTACATGTTCTCAGAACACTTAGGTGAGCCTACAATTGGGCAAAATCATCTGACACAAAGCCTATAATAAAATGTTGGAAATCTCATGTAATATATTGGATAATGTACCGAAAGGAAAAA
DNAJC24	18:35935826-36024062	DNAJC24L1	1:13398611-13398626	GTGGGAGGTTGGAGAGTGATCCCAGGAAATAGCAGACAGAAGAAATGCCATAGGAGTCCCTAGGCCTTGGGAGAACATGTAGTTTTGCCCCTCACTTGGCAAAGATTGATCAAAGGGCTGTGCTGCACTCAGGGGCTGGGCACCGAGAGGATGCATGGGAAGCAGGTGTGGTCAAAGTGGGAAGCGCGGGTATCGAGGACAGTCGGGAGAAGGTATAGCCGCCTGTGGCTGGGCCGTACCGCCGGGATGAACACGCTGATCTGAGAAGACCCACTTCTTGTTCGATGGATGATGGCATTTGAGCAGATACCAAAAAAGGACTGGTACGGCATTTTGGGGGCAGACCCATCTGCAAGCGTGTCAGATCTAAAACAAAAGTATCAAAAACTCGTATTAATG…	AAAAAAAAAAAAAAAAAAAAAAAAAAAAACAAAAAAAAAAACAAAGTGGGAAGCGCATGCCTCCAGCTAGTTAACTTACGCCCTTCTCCAAAGCCCTCGTACATCACTTAGGTCACTCCATGAATATCAGTGATATTATTAAGAAGTCCAGGTGAATACCTGGAAAACTTCCTGTTTCCTTAGACGGTTTCTTGATTTCCTGTTTCTTGAATCTCCTGGCTTTAACTGTAACC
DNAJC8	2:72193766-72218955	DNAJC8L1	16:13556093-13556110	ATATAAAACTAAGTGAAAATGTAACACAATTTGTCAAAACCTGTGGGATACAGAAAAAGCAGATCTTATTAGAAAATTTTATGGCACTAAATGCATATATTAGACAATAAGGAAGATCTAAAAATCAATAATACAAGTGTCCATCTTAGTAAACTAGACAAAGAAAAGCAAATTAAGGGGCCGGGGAAATGGCGGCTCCAGGAGAGAGCGGGGCTTCGGCTGGCGGAGGGAGCACCGAGGAAGCATTTATGACCTTTTACAGTGAGGTGAAACAGATAGAGAAGAGAGATTCCGTTCTAACATCCAAAAATCAGATTGAAAGATTGACCCGTCC	TAGTGGTAATATTTTGAACCTGGAATAAATTTTTTTACCCTAAAAAAAAAAAAAAAAAAAGAAAAGCAAATTAAATCTAAAGTAAGCATTGGAAAAGGAAGGAGATAGATATAGATCTTTTGATATGTAGATGATAGATCTATAGACATATCACATATCAAGATCTAGATAG
DNAJC8	2:72193766-72218955	DNAJC8L2	20:58126085-58126099	NA	NA
DNAJC8	2:72193766-72218955	DNAJC8L3	22:7249810-7249826	TCCTCGGTGCTCCCTCCGCCAGCCGAAGCCCCGCTCTCTCCTGGAGCCGCCATTTCCCCGGCCCAACCTCCACTGAGCTTTTTATTTCAGGTTTTGTATTTTTTAGTGCTAAAATTTTGATATGATTCTTCTCCATATTTTACATTTCCTTACTGAGACTTTCTATTTCTTTGCTGGGGCTTTCTAATTTTTCATGTATTTCAAGCATATTTGTAGTTGCTTGTAGAAGCATTTTTATCATGGATGCTTTAAAATCCTTGTCAGATAGTTTTGACA	ATTAGTTAAATAATAAGAGTAACTAACTTCATCTTAACAGAACAGAGAAAATAGAATAAGAAAAAAAAAATCAATGAGCAGAGTCTCAGAGACTTGTATGAGTATAATAGAAATTTAATATACATGCCATTGAAGTACCAGAAGGAAAGTA
DND1	2:35825154-35827913	DND1L1	5:86012184-86012200	TTGTTCTCAGGATTCACCCTCTCACACCATAGCTCACACTCCCGCTTGGACTGCATGACTCTCCCAATGTGGGACTTAATCTCAGGTCTTCAGGATCATAGTCCTGGGCAGAAGCTGGAGCTCAAACCGCTGAGCTACCCAGGCTGCCCTTCCTCAAT	AGATTTTATTTATTTATTCATGAGAGACACACAGAGAGAGAGAGAGGCAGAGACACAGGCAGAGGGACAAGGCAGGCTCCATGCAGGGAGCCCAATGTGGGATATTGAGGAA
DNMT3A	17:19489524-19563074	DNMT3AL1	4:68529377-68529393	NA	NA
DNPH1	12:11715215-11718622	DNPH1L1	4:71264279-71264295	NA	NA
DPF2	18:51833085-51847213	DPF2L1	10:26651580-26651595	CCTGGCCTCTTCTGTGGGCTACCTAGAAAGGACCCCCTCCTCTTTCTCCCCTCCCTGCCGTGCTCCCCGGGCACATCCTGATGCTGCCAGGTCTGCTGCAGACTTCCAAGATTGGAGTCTGCCAGGAAAACCTTGGGTCTCGGCCTGAGGGAGAGGAGCAGGGAAGATGGCG	TCTAAACATTAGTACAAATAAACATTTTNACACAGAAAAAAAAAAAAAAAAAAGAAAACCTTGGGTCTGAGCTACTAGGGAGCAAAAGGCAAAAAAAAA
DPF2	18:51833085-51847213	DPF2L2	29:17395393-17395408	NA	NA
DPH3	23:26522367-26529808	DPH3L1	1:75445522-75445540	NA	NA
DPH3	23:26522367-26529808	DPH3L2	5:8810847-8810862	AAAATACATTATTAAAGTTAATGCTACACCTTTCTTATTTTTCGAATGTGTCTACTCAGAAACTCAAAATGCCATCTGTAGCTGGCTTTATATTTTAACTGGACAGGACAGTTTCAGCCGCCATAGGAATTGAGATTTTACTCGAGAGAGGAGGCCACTGGAGGTTTAAAAATAAGTGAGGGGGAGTGAGCCCGTCCCCGGGGGCGACCGACCTCTGCTGGCCCCAGGGACAATGGCCGTGTTTCACGACGAGGTGGAGATCGAGGACTTCCAATATGACGAAGACTCGGAGACCTATTTCTACCCCTGCCCGTGTGGGGATAACTTCTGCATTACCAAGGAAGATTTGGAGAATGGGGAAGACGTGGCAACGTGTCCTAGCTGCT	GACACAGGCAGGGGGAGAAGCAGGCTCCCTGCATGGAGCCTGATGTGGGACTTGATCCTGGGACCTCAGGATCACGCCCTGAGCCTAATGCAGACGCTAACCGCTGAGCCACCCAGGCATCCCTCACTTATTTTTTTTTTTTTTGGATTTGAATTATGACTTTATTTAGCATGTCAATAATTTATTCTGGTAATAAATTAGTATGTACAGCAATCAAAAGTGTTGCGTGCTTTCCAAGAAAACAGCTTCTGAATGTGTACACTAAAATATATGTAGAATCATTTAAATAGGCAATTTTATTTTCAAACTCAGAAGTGTGGGAACATCAAGATACTGAAGAA
DPH6	30:3000723-3146568	DPH6L1	15:63143423-63143437	AGATTTGCTAAAGCAACAATTTGATGCCCAGCAACAACGCATTGCATCATATTATAACAGCTATCCTTCCCACCACTGATCAGAGCAGCGACCCTCATGCCGGGCGCAGTGCGCGTCGACTTTCAGTTTTAAATGAAAGAATATTCTAAGTAAGTCTAAGTCATGCAAATAATTAAAAGTCTCCATTATAGGTAAGTACATGGACAGTTATAATTAATTTTATTGTGTTTTGAATATGTAACTCCACTTTTTATCTTCTACATCATATAAGAGAAATTTAAAAAATCATCTATTATTATGAACCCAA	AAAAAAAAAAAAAAAAAAAAAAAAAAAAAATAAAACTGAAAGTCTCCTCTTAGCATTTCTTTCAAGACAGATATAGTTGCAATGAAATCTATAGCTTTTATCCCTGTCTTAATATAGTCCTCATTTTTGAAAGAGAATTTTGCTGGATATAGAATTCTCATTGGGTAGGTTTTCTGTTTGTTTGTTTGTTTTTTGTTTTGTTTTGTTTTGTTTTGTT
DPM1	24:37249203-37268620	DPM1L1	24:20649972-20649988	ACCACCCATAATCTTACCACTGTTAATATTCTAGTGTTTAGCCTTCTAAATATTTCACTCCAAAAGTAATTTGACAACTGTATAAGAAGTAAGATGAAACAAAGTAAGCTTGCTTGCTTTTCAGTCACTCAGTTTAAAATAAAGTTGCTAGAGTTCCGCGATGGCCTCCGAGGAAGCGAGCGGTAGCCCTCGTAGGTCTC	CGAAAAAAAAGTTTTTGGGTTTTTAAAAAAATACAAAAAAAAAAAAAAAAAAAAAAAATAAAGTTGCTAGTCAACATTCCCTGAGCACACACATACAAATACACATACAAAGTCTACATTCACCCATCCAATTCAAGACACATGCCTATTGGCAAAACAGACATGACCCAAAAAAGAGAAACTACATTCAACTACCTTTAATAATCTACCATTATGCCTAAATATATATCACCAGATAGTTTC
DPPA2	33:14458001-14465756	DPPA2L1	17:54191364-54191380	AAAAATTAAATCTACCCAAAAGAAGAAGAAGGAGTTAAGGCAGATTTTATTTTTTTATGCATAGAAAGATAACAGAATATATCAACTGGAACCCAAGAGGATCTCAGGCTGAAGAAGTCAGTCTGTATCAGAATAGAAACACAATTGTGTAGGGATTTAAGTCAAGAAGCAACACAGGAGAGGTGAAGAGGATTGGAGGGCCCAAGTCCTGACCTTGCTG	GTGTGTTTCTCATAAAAAAAAAAAACCTAAAAAAAAAAAAAAAAAAAAAAAAAAAAAAAAGAAGCAACACAGGATTCCAGAAGTCAACCCGGGATACCGTGGCCTGAATCAGAATAGCAGCAAAAGCAAGGTACTCTCAAAGCAAATATAA
DPPA2	33:14458001-14465756	DPPA2L2	20:5209426-5209441	AAGGCAGAGCCAGCAAGGTCAGGACTTGGGCCCTCCAATCCTCATCACCTCAAGCATCTGCCTTTGGCTCAGGTCGTAACCCCAGGGTCCTGGGATCAAGTCTCATGTCAGGCTCCCTGCTCGCACGGGGAGTCTGCTTCTCCCTCCCTCTCTGCCCCACCACTCCCCTTGCTTGT	ACAGAAATTAGCTTCTGGACTCTGTACAATCTATAGTGTAGCAGTTAAAAGCCTAAGTTTAGGCACCTGGGTGGCTCAGTTAAGCATCTGCCTTTGTTTTTTTTTTTTTTTTTTTTTTTAAAATTAAATTATGGTTTTTATTAAAAAAAGACTAACCTCCCAAAA
DPPA2	33:14458001-14465756	DPPA2L3	22:33949716-33949730	TCTTTCTTATTTTAGATCAGATTTACAAGAGAAACAATTAGATATTGTTAAGACTAAATGATATAATCTAGTCAAGTAAAGAAAAAAACTAAACTCCTGTTTGTAAGACATATGTTGCAATAGGGTTTTTAGAAAAATAGTAAAAAACATGTAATAATAGTAGAAATGAAATTGCCTTTGCGCTCAGGTGAAGAGGATTGGAGGGCCCAAGTCCTGACCTTGC	AAAAAAAAAAAAAAAAAAAAAAAAAAAAAGAAATTGCCTTTGCCATCAAAGAGAGTTGGGTTTGATGTTTGACATCATCAAAGTCACTTGTCCTTTTGAAGTCTCAATTTCTCCATTCATTAAATATTATTATCCACCTATAGGTTTTCTGTGCAGATTCAATGAGACATAATAATAGTAAGTATATTATCATTTTGACTAGCCTATGGTTCAGTC
DPPA4	33:14483212-14495319	DPPA4L1	14:42092036-42092054	NA	NA
DPPA4	33:14483212-14495319	DPPA4L2	19:12560027-12560045	NA	NA
DPPA4	33:14483212-14495319	DPPA4L3	27:29258417-29258431	NA	NA
DPPA4	33:14483212-14495319	DPPA4L4	28:15469473-15469493	TGGCTTCTTCCGACACAGGTTGGGATTGGCCAGCCAGGTAGTCTTCCCCCGACTTCGTGGAGCCCTGAAGATTTTCCTCCCCCATTCCTTTGTTCTGGACCTCTTCCCAAGAAAGCTTTCCCTGCTATTGCCAGAGGGATTCTATATACTTATTCAGTGGTTCATTGAAGATACACAAATGTCTTTAATTCAGCCTAGCAGCCCCCTCCAACCTTAAAGAGTTCTAATTGGGCCTCAGAAACTCCTTTACTAAGAATTCACCTTAGTCAACTATCTTTAGGCTGAAATTAATACTAAAAATATGTATCTAATATATACATATATAAAAATACACCCACATACACATACATACATGTAAACAGTGGAAGCAATTCTTAAAGGAACCAACAT	AAAAAAAAAAAAAAAAAAAAAAAAAAAAAAGAACTCTTTAAGGTTGGAGTGTTCCATTCATCTCTGTGCTAGTGACCTGAATGCAGTGAAGGCGCTCAGTAAAGATTCGTTGATTCAATGCATTTCAGGTGAAATGTGGCATTGTGAGTGATTGAAGCCTTCATGTGAGTTTTGTTGTGGCCACCAAGCTTGT
DPY30	17:25368121-25380882	DPY30L1	2:52721020-52721036	CCCTCCAGCATCTGCTCTGGCTCCATGGCGGACCCCGCGCCCAAGCCGCTCGTTCTTAAGAGCCCCTCAACTCCCTATTTAAAGTGAACAAGTAATCAATACAAACACCACATTGATCTCATACTTAAAGCAGAACTTGTTGCAGAAAAACAACTGGAGGAGATAAAGTTAGTTTTGGAATTCCTGTCCCTCATCTGTCTTTCTGTGCGGCTTCCCCAAAGACATTAGAATACCCCTGTGGCTACAATAGATCTTCCTGA	AACTTTGTTTTTAAAATAACCTTCAAAATAAACCGTTAAAGCGTCAAAAAAAAAAAATAAATAAATAAATAAATAGGGAGTTGACTGCATAGCAATATCTGCCAAATTGTAGGGCTTCATTTGAAAGCCAGAGAATGAAGTGCTTAGAACATCCATGTTACCCACTCTCTATTATACCCTTCAGATCACAGGGCAGGAAAGTCTCATCCAGGGTCCAGAAAGTCGCCAATCAAGCCACCTGGTAGGCCCACTCTGGGTGGGTAATCAGGAGCAGTTCTCCTTAAC
DSTN	24:5394972-5402443	DSTNL1	7:37144001-37144033	NA	NA
DSTN	24:5394972-5402443	DSTNL2	11:28171639-28171654	TTTATGAGAAAAGGTATCTTGGGACATGCAATCTGTAACAAAATCAATGACCTAGAATTTCACTATAAAAAGTTGAAAAGGAAAAGCAAAATAAACCCAAAGTAAGTAGAAGGAAGAAAATACTAAAGATAAGAGCAGTTGTAAATGAAATGGAAAAAAAAAAAAAAAACAGAAAAATTAAGCCAAAACACAATTGTTTAGAAAACAATAATAAGGGGTCTGTCGCTGGCTCTGCGGTGCGGAGGTCGCTCTGCAAACTCGGCGCCGGCCGGCTCCCTTCCGCGTCCCTGCGACCGACCGCCGCGGCGAAGATGGCCTCAGGAGTGCAAGTTGCAGATGAAGTATGTCGCATTTTTTATGACA	GGGATCATGACCTAAGCTAAAGGCAGATGCTCAACCACTAAGCCAGCCACGTGCCCCAGAGATTTATCAATTTTATTATTGTTTTCTTTTTTTTTTTTTTTTTTTTTTTTTTTTTTTTTTTTTATAAAAATTTTTTTT
DTD1	24:4452053-4637186	DTD1L1	21:16453440-16453455	AAAAAAAAAAAAAAAAAAAAAAAAAGTCTAGTTGGCAGGGGGTAAGAGGAGAAAGAGGGATGAATAAAACACATAAGATGTTTAGGGCAGTGAACCTATACTATAATAGTGGATATATGTCATCATAAATTTAACCAAACCTATAGAATGTACAACAACCTACCATAATCCAAGAATATACCCAACCATAAACTACAGATTTGGGGTGACAACCACATGTCAATGTAGGTTCATTAATTCTTAACAAATATACCTCACTGATGGAGAATGTTATAATG	AAGATAAGATTCAGGGAGAGTCTCTGTCCCTGAGCAGACAACAGCAATCGAAGAAGAATAAGAAGCCCTCTACCAGTAATAATGAAAGGAAGAATGAGACAAAGGCTCCAAGGAAACACAATCCAATGTCTTCCAGCATTCAAAGCCTGGTTCACTCATTCTATGAAGTAGGACCAGAGAAAGCTTGATCTCTGGCTAAGAATTTAATATGGAGGGGCTTGATATGCACATCCACTCAGTACATATTAGTGGTTAAAAGTCTAGTTGGCGGCGCGGCGCCGCCCGACTCGCCGCAGCCGCCGCCATGAAAGCCGTGGTGCAGCGCGTCACCCGGGCCAGCGTCACAGTTGGAGGAGAGCAAATAAGTGCTATTGGACGGGGCATCTGTGTGTTGCTGGG…
DTD2	8:10694999-10706155	DTD2L1	22:38912311-38912326	CAAAGCTGTATGATTATGTGAAACAGTTATAAACTTTAGAAAATATGTTACCAAACGTGCTCTTTTAGTAAGTAGGTTCATATCACTTGATTAAAAATTAGAGCACATATTCATCTGATGCAATTTTGTGTTTTGGGAAAGAAATTTTAAATGTGGCAAATATGCTAAAAATTCAAACAAGATATCAAAAGAGCCTTACGAACGTCCCGCCGCCACGACCCGTCACGTCCTCCCTGCGCGCTGGAGGCGGAGCCTGCGCAGCGCGATCCTTGAACGCGTCGGGTTGCCACGCGGGTTCGAGCCACGGCTGACAGCTGCCGGATGCCTCAGGCGCGGGCGCTTCTGCAGCAGTGCCTGCACGCCAGGCTGCAAGTACGCCCAGCCGAGGGCGACGCCGAG…	ATAATATAGTATATAGATTTTTTTTTATTTTTCACAGATAAGAAGACTCTGGGGTTAGTTACTTGAGTGTCTAAATCTTTTGATATCTTTTTTTTTTTTTTTTTTTTTTTGGTTTTAAAAAAAAAATTTTTTTTTCCCCACCTTTTTTGGGGCTGAAAA
DUSP14	9:37253305-37277320	DUSP14L1	1:63569104-63569119	GCTGTGACCTCTGGAGCTCATGAAGATGCCAGCAATCACACTTGCATCATTGGAAGCAAGACCAGAGGGTTTTGTTTTCCTCCACCAAGGAATCCAAAATCACCGTCTCCTTCTTGTGAGGAATCTGGTCACTCTGCAGTCCTGGTCAGGATCTGGAAAGTCCTAGTTGAGAGTGCTGATCACAGTGGATACAAATCAGATCGGCTCGGCCCCGCGGCGGCTGGCGCTCCGTCCTCCTGCGCGGCTCCTGCCTTCTGCGGGCTGCCCGCCGCGCGCGCCCCGCCTTCTCCCCTCCGCCCGCGCCCGGGGCGGGCCGCGCGCAGGCTCCCTGCGCCCCTCCGCTCCTCCGCCTGATATCAAATTTGTAAATGTTTTCTGAATTATGTTTCATGCTTGGAC…	ACCCCACAGCAACGCACTTTCCGTTTATTGTGAATTCTTTCGGATATTATGTCGTTCTTTTGGAGACAAATTTATGGGTATGTAAATCCCCAACTTACAGAAATGTGTAACTTGTTATGATATCAAATTTGTTTTTTTTTTTTTTTTTTTTTTTTTTTTATTAATTAATAATTATTTAATTTAATTTTTCTAATATATTTCTGGGGCACAAT
DUT	30:14572766-14585621	DUTL1	35:23748123-23748272	NA	NA
EAPP	8:13316239-13399221	EAPPL1	8:10999391-10999408	CCATTGGAAACACTTCTAATTAAAAAGTAAGTTCACCAATGGCCAGAAGCTTTCTGGGCAGGGGGTGGGGGGATGAGGGACAATGGGAGGAAGTTATAATATACGGTATATAATGTATACGGTATATACAGTAAAGCATGGGAGACATATAGGTCAATTATCTGCAAAGTGGACACCCAACACTAGGTTAAGAAGGAACATCACAGGGTACCTGTGGCGTAAACAGATGCTGTGTGGACGCTTGTAGTCGGCGTCCG	TTTTAAAGCTCTTTAGAATTAAAATTTTTTTGAGTTAAAATTAAAAAAAAAAAAAAAAAGAAGGAACATCACAGAAGGAACATCAACATCACAGGAGCCTCAGTACTTTCTCTCACAATTGCTGCCCTCTTCTTCCCTTACAAAGT
EAPP	8:13316239-13399221	EAPPL2	11:62615143-62615160	GGGAAGCATAACTCCAGCTTAGCCAGATTGACAGCTATCACAGGCTGGACAGGTCGATCACAGCAGATGGTGCTTCCAGGCTAAGGATTCTGGTGGGGGAACAGAAGTAAGTCTCAGAAAATTTTTGTTTCCTTTTTAAGTAGACATGGTTTGATCAGCTTTACATTTAAAAAGACCTCTTAGGGGGTACCTGTGGCGTAAACAGATGCTGTGTGGGCGCTTGTAGTCGGCGTCCGAGGGTGTAGGTCACCATGAGCCGGCTCCAAGATGAGTACGACCCCTACGCAGTGGAAGAGCCTAGCGATGAGGAACCCGCTTTGAGCAGTTCTGAAGATGAAGTGGATGTGCTTTTACATGGAACTCCTGACCAAAAAAGAAAACTCATCAGAGAATGTCTTA…	AAATAAATAAATAAATAAATAAATAAATAAATAAATAAAAATAAATAAAAAATAAAAAGACCTCTTAGGTGTCAGGGTGGACAATGATCAGTGATAGGAGACAGGAAGCCAA
EAPP	8:13316239-13399221	EAPPL3	16:52480768-52480784	AGGGGAAACGTGGAGTTGTTCGACAACTATAACATTTCGTCTGTACAAGATAGATAAGTTCTAGAGATCTGATATACAACACGGTGCCGACAGTTAACCAGACTGTATCGTATACATCGAAATTTGTTGAGAGGGCTTGTAGTCGGCGTCCGAGGGTGTAGGTCACCATGAT	TTAAAAAAAAAATTTTGTGGTTTTAAAAAAAAAAAAAAAAAAAAAAAAAAAAAAGAAATTTGTTGAGAGGACAAATCATGTTAAGTATTCTTATCACAATTTCCAAAATTAATTTACCTGCAAATCAACTGTAAAAGGCGGAAAATGTGTGGGTATATTGAGATAGTGCTTTACTGACTATATTACACATGGGAAACCCCAAATGGAAATCTAGAAAGAAAATAAGATGATCCTGGTCAA
EAPP	8:13316239-13399221	EAPPL4	X:99043347-99043362	NA	NA
EBAG9	13:10081700-10099737	EBAG9L1	20:32623219-32623234	NA	NA
ECHDC1	1:66012245-66073008	ECHDC1L1	7:67596095-67596111	NA	NA
ECI2	35:4349075-4367662	ECI2L1	30:10712830-10712830	NA	NA
EDF1	9:48722918-48726358	EDF1L1	34:12810494-12810507	CATGAAAAGAAAGGTGTATTTTACTTTTATATCCAGGATAGTCTGTAAAATGACATGAAAAGTTGTTGGTTAAAATTAGTGAATAAAGATGAGTTGCGGCGCCGCCGGGTCTCGAGCAGCTGCCGCGGAACCGCGGGACGGAC	TCTCTCACATCTAGAACTTCTATGGGCATCATTGTTGTTGGAGGAGTGGTAAGAAGTCCTTCTTAGTATAATTAAAATTGGAATTTTTGCAAAGCTGTCTGCTAGATCATGAAAAGAAAGGTGTATTTTACTTTTATATCCAGGATAGTCTGTAAAATGACATGAAAAGTTGTTGGTTAAAATTAGTGAATAAAGATGAGTTGCACCGGTCTAATCTTAAGCTTTTAAAACTATAAATTTATTTTAAAATTGAAATATAATTGACATAACGTTGTATTAGTTCCAGGCATGCAAGATAATGATTTGATATACGTATATTGCAAAGTGATTGCCATAGTATAAATTTTTAACGAATGCTTTAGAAAAAAAAAATACCACCAATTAGCTACACCTTAAAAC…
EEF1E1	35:8012304-8035176	EEF1E1L1	26:11472594-11472613	AAATAGTCAAACTGTGCTCCTTTCCTCAAGTAACCTCAGCTCAGAGAAAGCTGCCAAAGCATCCAGTTTTTGTCAATGAGTTAATTTTAAAAAGAAGAAAAAGAAGGAGAAGACGATGACGACAATGATGAAGTTCCAGACACTGGCTTTTGGACTTCCAAAGGCATCGAGGTGGCCACTGAGTATGAGGTATGACAGGCCACTCTTAAGATTAAGATTTGGAGTGTCCATCTACTCGAGTTACCCTGTATTCCAACCACTGCTGAACGATCGCTTTTTCTTCTGCAGTGCTCCCAAGCAAATATTCTTTGTTGGCCTGCTTGACAAGATGAGCTGCTATAGTTGTCAGTCCTGTTAGACTCGGACCATTGTTTGTCTGAAGAACTGGAATCTGGCGCT…	AAAAAAAAAAAAAAAAAAAAAAAAAAAAAAGATTAAGATTTGGGCTTACTGGAGCAAACCAGTGACTACTTATTGGGTCAACCCTGTGCTCAATATTTCCTGACAAGCACAATTTCCTGACATCTCCACACCAACCCTATGGACAGGTCCCATCATGAGACCAAATCTACAGATTAGAAAAAAAATAAGGCTTAGAGCAGTTAAGTATCTTCCCCCTAATCATAAAAATTTTCAAATGGCAAAGGTAGGACTCATCTCCATTGTACATGGTTCCTGCCCCCCACATCTGCTTTCTTGAAACTT
EEF2	20:55577413-55586422	EEF2L1	14:52523502-52523518	ACTAAACAATCCATCTTTTCCCCAACCGAGAAAATCTTGGCCTAGGTAACAGAGAGCTGAGGTACATAAAATTGCCTTTAGATACTGAGTTTTTCTACCTATGGAGTTTCTTTTCAGTGCACTTTTATTTTATTTACTGACAATAGAAAGCACAGTCATCTTGGCACAAGCAATATAATGATAAATGAAATGTGGTTAATGAAACATCAATGAAATTGTTGATTCCGTCGCTCGGATCTACCTGGGAGAATCCACCGCCATCCGCCACCATGGTGAACTTCACGGTAG	AGCAACAGGGGCCTAACGTTAAAAAATCAAGCTGTGATCTCTTTTGTTCCAAGAACCACTTTCTGCTATTACCAAAACATTGTTCTAAAAAGAAAAATCCCTGGAATCAACAATTTCTTTTTTTTTTTTTTTTTTTTTTTTTTTTTTTTTTTTTTTTTTTTTCTCTTAACTTCTTTTTATTTTTGCCA
EEF2	20:55577413-55586422	EEF2L2	32:6208314-6208387	ACCATCACTCAAAACTGATTTACTCCTAAGGACTTTGCTCTGCATATCTTCATTCCCTCATGCCCTTTGTTTGTTTATGTTACTTAAATTCTATTGGGGCTCTTCCGCCGTCGTCGCCGCCATCCTCGGCGCGACTCGCCTCGCTC	ATTATGTATTACCATTTAACCTGTTGTAGTCTCTTCATAGCACTGATAAATTCTATTGGGAACAAAGGGCTTGATATTGGACTGCAGAGCCCATGTAAAATGTCTATGCTATTATATATGTCAGC
EI24	5:8949886-8963967	EI24L1	1:49336613-49336615	ACTACGTTGGATTTGGTTTGCCCTTGGCTTTCCTCACAGCAATGCAGTCTTCATATATTATCAGTGGCTGCCTCTTCTCCATCCTCTTTCCTCTATTCATTATCAGCACCAATGAAGCAAAGACACCTGGCAAAGCATCCCTTTTCCAGCTGCACCTCTTCTCTTTGGTGGTTTTCTTAAGCAACAGACTTTTCCACAAGACAGTCTACCTGCAGTCTGCCCTG	GGGTGGTGAAGAGATGGCTGACAGTGTCAAAACCTTTCTCCAGGACCTTGCCAGGGGAATCAAAGACTCCATCTGGGGAATTTGTACCATCTCAAAACTGGATGCTCGGATTCAACAAAAGCGAGAGGAGCAGCGTCGAAGAAGGGCAAGCAGCGCCTGGCGCAGAGGAGAGCCCAGAGCATAGAAAGGA
EI24	5:8949886-8963967	EI24L2	7:48980491-48980508	NA	NA
EIF1AX	X:16081335-16102627	EIF1AXL1	3:18056702-18056720	CAACATTTTGATTACTTGAGCATACTCTTGTCCGTCTTCTTTGAACACCAGCTCTCTTTTTTCAGATTCATTCTCATTCTTACCTCTGCGTCTATTTTTACCTCCTTTACCTTTATTCTTGGGCATGGCGGTGACGGCGGCTTCCTGGCGTTTTCGACTCCAATCTAGGGAGCGGCGGCGGCGGCGGCTGCGGCTACTCCTCCGAGGGGCCCCAGGAGCGACGCGTGGGACCGCGCGGTAGCAAGCAGGCAAGAGAGGACGGGTCGCGTGCGCGGGAGAGTCTCGCGACCGAGTTCTTCCGAGATCAGCCTGCGCCCACGCTCAGCCGCAGCAAAATCCAAAGCTTTTTGTTTTGCAGTGGATATCCAACCTTCTGGTATAATTTTTTCTGAAATTTTT…	TCATAGCTAAGAAAACTTTGCTTAACACAAATTCACATCGGTTTTCCCATATATTTTTCTAGAAGTTTTATAATTCTAAGTTTTAAAATTAGGTCTTTGATCAATTTTGAGTTATTTTGAATATATGGTCCAAAGCTTTTTGTTTTTTTTTTTTTTTTTTTTTTTTTTTTTTTTTTTTTTTTTTTTTTTTTTTTTTTGGTTTT
EIF1AX	X:16081335-16102627	EIF1AXL2	4:14891370-14891406	NA	NA
EIF1AX	X:16081335-16102627	EIF1AXL3	11:5387809-5387825	GGAGAGTCTCGCGACCGGGTTCTTCCCAGATCCCGTTTTTATAAATTTTAGGGGAGGATCTCTCTATCTCCTGGATCTGAATGCCTGTTTCCCTTCACAAGTTAGGGAAGTTCTCA	GCAAGTTTCACTATTAAATGTCGGGGTGTTGAATGGTTTTTAAAAATTTTAGGGGAGGACCTTTTTTTATCCTGTATTTAATTGCCTGTTTCCCTTCCCAA
EIF1AX	X:16081335-16102627	EIF1AXL4	27:21876226-21876243	GCGCGGGAGAGTCTCGCGACCGAGTTCTTCCGAGATCAGCCTGCGCCCACGCTCAGCCGCAGCCGGCTTTTCCTATTTTTCAATACTCCACCCTTTTTAAAATACCTCTCTCAATTACTTAGACAATTGAAATGCTTTGAAAAAATTAAACTATAAATTACCTTATTATATTTTATAACAGCTTCTATTTTTAATATAACAAT	TTCTCCCTCTGCCTGTGTCTCTGCCTCTCTGTGTTTCTCATGAATAAATACCTTAAAAAAAAAAAAAAAACTACCAGGGAATAATTCCACATCTCCATGGCTTTTCCTATTTTTTTTTTTTTTTTTTTTTTTTTTTTTTTTTTTTTTTTTTTGTTTTAAAAAAATTTATTTTATTTTAAGGCAAA
EIF1	9:21098869-21101612	EIF1L1	5:39861099-39861112	ATGTATTGCTTTAAGGACAAGAGCTGACCACTGTTTCTCTAGCATCTTGCTAGCTCTCGGCACAGAGCACATGTGAAGTAAATATCACCAAATGAATGTTGAAACTGAAAATTCGGCCCCAGTCACTGAGCCGCCGCCGAGGACTCAGCAGCCTCCCCC	TAGAGGAAGAAGCAAGCTCCCCTCTCATCCTTCTTTCCTTGGTTTAGAAACTGAAAATTCCCAATATTTCAAACCATATTAAGAAACCTGAATGGATGAGAGCTAGAGAGCTTCCCGACTACCCTACTCTGTTCCTAACAT
EIF1	9:21098869-21101612	EIF1L2	11:26082694-26082704	CGAGAATGCTTAACTAGGGATGCCTGGGTGGCTCAGCAGTTGGGAGTCTGCATTCAGTTCAGGGCGTGATCCTGGGGTTCTGGGATTGAGTCCCACATTGGGCTCCTTTGCAGGAAGCCTGCTTCTCCCTCTGCCTGTCTTTGTGTCTCTCATGAATAAATAAATAAAATCTTAAAAAAAAAAATGCTTCCCCAGTCACTGAGCCGCCGCCGAGGACTCAGCA	AAAAAAGCCAAGGTTTAAAAAAAAAAAAAAAAAAAAAAAAAAAAAAAAAAAAAAAAAATGCTTAACTACTTTAAAAATCCCAAGCAACAGTAACTATGGCATAGCCTCCTTTCTTAGAATCAGACTGGCATGTTGGAGA
EIF1	9:21098869-21101612	EIF1L3	14:51011019-51011036	GGCTCGAGGGGGAGGCTGCTGAGTCCTCGGCGGCGGCTCAGTGACTGGGGCAATAGCTTTCATTTTTAAAAGAGTTTATTGTACCACTCTCATTGTCTCAAAGCAAATTTCCCTGGATAAATAGTATGGGTCCTTTAGTGTCTGTGCTGCATGTACAGCCTGCTCTTTGGTGACATGCAAATGCTTCATGGGTGAACCAATCCTCAA	TGTTTTTGAATTTATCTAAACCCTTATTTAAATAAAATTTTTTTTCAAAAAAAAAAAAAAAAAAAAAAAAAATGAAAGCTATTGTCTGGAAAAGCCATCAGGGATTGCTATTTGACCCAGAATCATCTCCTCTAAAGCCTTCTGTCCTTGCATACTTATGTTATACAGATAGTACTTAATATTTTGTATTATGAGTGTTTTTATTGTCTTTTTTTCCTGTCAAATGGGACTTCTTTAAAGATAAGAACCTTGCTTTCATATATATATAT
EIF1	9:21098869-21101612	EIF1L4	17:63971861-63971875	ATTAGGTGGAGGTGGGATGGGACAGAGTGAAAGACCGGAGAGGCTCAGGCAGGAGTGATCTGAGCAGTGGTCCTCAAATCCAGCTGCCCATTAAATATCTCTATTCCCAGTTCCACCTTGAACCAGTAAAGTCAGAATCTCTAGGGGAGGAGCCAGAACATCACTACTTGTTATACTTGTTGCCGGGGTGAGAACCACTGGCCTAGAGCTTTTGCTAGAACTTCTATGTTGGCCCCAGTCACTGAGCCGCCGCCGAGGACTCAGCAGCCTCCCCCTCGAGCCCCCTCGCTTCCCGACGCTCCGTCCCCCCCGCCCGCCTTCTCCCGCCGCCGCCTTCCGCAGGCCGTTTCCACCGAGGAAAAGGAATCGTATCGTATGTCCGCTATCCAGAACCTCCAC…	AAAATAAAAAAAAAAAAAAAAAAAAAAAAAAAAAAATAAAAAAAAAAAAAAAAAAAAAAAAAAAAAAGAACTTCTATGTTATCTTGTCCCACTGATAACCATGTGTATATCCATATGGTGTTTATTGGGGTCAATAGGAGCCTCGATAGATCTGGCTCTACTGGCTCCACTTAGAAAAGAGGAAACAAGTGAACAGAGCGTGTCTCCATTTGTG
EIF1	9:21098869-21101612	EIF1L5	22:26957130-26957147	CGAGGGGGAGGCTGCTGAGTCCTCGGCGGCGGCTCAGTGACTGGGGCCCCCACCCAAGAATTTTAAAAGGACTTCAAGGATCCACTTCACAGTGCAGCAAATGTGTAATCTTATTATTCAAATAGAGCAGTTAGAGT	ATTTTAAAGGGGAATAAAATGTAAACTTTGGGGAAAAAAAATAAAAACATTACTAGGTTGTACCCACCCAAGGGAAAGGGAGAAACAGACTCCCCACTGAG
EIF1	9:21098869-21101612	EIF1L6	35:3054822-3054837	NA	NA
EIF2AK1	6:11447225-11478611	EIF2AK1L1	22:16730210-16730225	NA	NA
EIF2AK2	17:29494641-29537933	EIF2AK2L1	10:51578250-51578265	CGCCGCCTGCAGGGTCCGGGCCGCTCGCTGCTCTCAGTTTCGGTTTCCCCCTACACTAAGGATTTTATAAGAAGCTGTCACACAGAGCCAAGTCTGCCAAAAGAGCAACATTGCATGCAT	AAAAAAAAAAAAAAAAAAAAAAAAAAAAATCCTTAGGGTATATTTTTTTTTTTTTCTATTTTCCAACCACCTTTTTAAATAGCAGTGTTTGTTTTTTTTTTTTTTAATCATGTTCTAATCCAATATTATTTCATTATAGGATGCC
EIF2B2	8:48110521-48117175	EIF2B2L1	8:6327842-6327846	TCTCAAAATTTGCTAACAGATTACATGTGGGTTATAAGAAAAAAAAGGGTAAAAAGTGGGAGGACAAAGACATCACTTGACAAAATTAGAAAAAAAAGGAATAAAATCAATAGAAAAATTAGCAACAAAATATATAGAAATCTGTTGTGTCTCTATAGACTGATAATAAACTATCACAAAAACAACTATCACAAAGAACATTTTTTAAAAATCCGGCCCCGGAAGTGCAAAGACCGACCTTGTGCAGGTGCGGAATCCGCCGGCGAGGCGGCTGTTTTCGAGATGCCGGGAGCCGCGGCTGAGGGCTCGGAGTTGTACGGGAGCATCGAGAGTTTCGTGGAGGCCCTGAAGCGGGACGGTGGGCGGCGCAGCTCCGAGGACAT	ATTTTCATTAATTTGTATTGTTTTTAGTTTTTTTCCACCAATGTCTTACAGTTGTTAGAGTGCAGGTTTTTTCACCTCCTTGGTTAGATTTATTCCTAGATATTTTCTTTTTGAACAGTTTGTAAATGGGATATTTATTTATTTATTTATTTATTTATTTATTTATTTATTTATTTTTCTTCAAGAAGCTTTTATTGGCACCGGCCAGGAAAAGGTGTGGTAGCCATTTCTGAGCAAAAA
EIF2B2	8:48110521-48117175	EIF2B2L2	19:19555828-19555845	ATAATGTGCTCTGGAGTCAGGCGTAAAATTGACTCCCAGATTTTCCTGTTTCTGTCTGTGTTAATTGGCATGATTTACTTAAAATCTCAGCACCTCAATTTCTTATTTGTAAAATAGAATTAAAAATACTTATTCTACAGATGTTGTGAGGATTAGTGATATTAAATTTCAAGTAATTGGCCCGCCCCGGAAGTGCAAAGACCGACCTTGTGCAGGTGCGGAATCCGCCGGCGAGGCGGCTGTTTTCGAGATGCCGGGAGCCGCGGCTGAGGGCTCGGAGTTGTGCGCGAACATCGAGAGTTTCGTGGAGGCCCTGAAGCGGG	GCGGCAAAAAAAAAAAACTTATGAAAAATTCAAAAAAAAAAAAAAAAAAAAAAAAAAATAAATTTCAAGTAATTGTCACAGAGATCAATAAAAATATAGTGTACAATAACACTGCTATGTTTGTTTTTGAAGAATCCATGTCAATTTAGATATAACAGTTCACCAACCATTCATTCATTCATTCATATACTTAACACACATTGTTGAT
EIF2B3	15:15337421-15481427	EIF2B3L1	12:36167061-36167076	NA	NA
EIF2B3	15:15337421-15481427	EIF2B3L2	X:112498245-112498260	TTGGAATTCCATTTTCACAAACTCTCAGCTCCCGGCGCGCCACGGCCGCTCCCAGCGCTCCCCACGCCGCCTCCCTGAAATATTTTTCTTAAACCCAGCTTTCATTATATTTGTGGTTTAGCATAGGCTCCCTAAATCTTTCTAGATAACATCTATACTTATACCTTCCAATTATCTATAATCTGGCTTTACTGACATATGGAAATAGATGGCTCACTGGTTTCCCATAAGCCTTTATTTTCATTCAATATCTACTGAGAACTACTGTTGTGGAAGGCACTGTCC	AAAAAAAAAAAAAAAAAAAAAAAAAAAAAAAAAAAAAAAAAAAAAAAAAAAAAAAAAGAAAAATATTTCAAAGGATTTCCATTGATATTGAGATAAATAGAAACATCCTTGGAATTGACTATAAAAGCTTACATGGACTGACCCCTCACGACATCATCCACAAAATT
EIF2D	38:2851972-2871518	EIF2DL1	8:33362077-33362092	TCCCTTCAGAGCCCTGACCAGTGCTGTGCATAATTATCAGTGTCAGTGTCTGTTTAATCTCTACCTTCTTCCAGGGACTTGCAAGTCCCATGAGCGCAGAGACCAGAACTACCTAATGCCTAGAACAGGGTAAGCACTCAATAAATATTTTTGAGGAAATAACCAAGTAAAGGAATGGATGGGTTTCCCAGCCGGGCCCGTTTCCCAGCCGGGCCCGTTTTCCAGCCGGGCC	TTTTTTCCAAAAAAAATTTTTTTTTTAATTAAAAAAAAAAAAAAAAAAAAAAAAAAAAAAAAGGAATGGATGGATTGGTCAATCAAGAAAAAGTGATGGCAGGATTTATGTAAGGTTGTATAGCCGGCATCCACACCCAAGTG
EIF2S3	X:19662132-19680223	EIF2S3L1	8:14124302-14124318	CCCCGCCATCTTGCTCCGAGAGGAAGGAAGTCCTCTTTTGTGGTTCCATGCAAACTTTAAGATTGTTTGTTCTAGTTCTATGAAAAATGCTGTTGGTATTTTGATAGGGGTTGCATTAAATATTTAGATTGCTTTGGGTACTATGGACATTTTATCCATGTTTGTCCTTCTC	ATTTATACATCAGTACAGGTTTGAAATGAAACTATTTGCTAGAACCAGCCTGTTCTGTAGCACACGTATCAAACCTATTTCAAATAAAGATTTTCTTCTTACTTTGAAAAAAAAAAAAAAAAAGGAACCACAAAAGACCCTGAATAGCCAAAGCAATCTTGAAAAAGAAAAACAGGGGTGCCTGGGTGGCTCAGTTGGTTAAGCATCTGCCTTGGGCTCAGGTCATGATCTCAGGGTCCTGGGATTGAGTCCTGCCCGACTGCATC
EIF2S3	X:19662132-19680223	EIF2S3L2	8:41638264-41638280	CAAATATTGTTAAAATGTCTATACTATCCAAAGCAATCTACATATTTAATGCAATCCCTATCAAAATACCAACAGCATTTTTCATAGAACTAGAACAAACAATCTTAAAGTTTGCATGGAACCACAAAAGAGGACTTCCTTCCTCTCGGAGCAAGATGGCGGGGGGCGAGGCTGGAGTGACTCTGGGGCAGCCGCACCTTTCTCGCCAGGATCTCGCCACCTTGGATGTTACCAAGTTGACTCCACTTTCACATGAAGTTATCAGCAGACAAGCCACAATTAATATA	CATGACCTGAGCCCAAGACAGATGCTTAACCAACTGGGCCACACAGGCATCCCTAGAAGTTTTACTCACACTTAATTTATAAACTTTACAATTCACCTTTTAGAACCATATAACTCAATGGCTTTCATTATAAATACGGAATTGTGCAACT
EIF3F	21:31514930-31525651	EIF3FL1	5:12312642-12312657	NA	NA
EIF3F	21:31514930-31525651	EIF3FL2	22:7931392-7931403	ATGGAAGCCAAAATGACCGGGTGCAGCCGGACCACGCGGCCCCCGGGGAAGGGGCCTGGGAGAGCAGGACCCGGCAGTGACTGCGCCGGAGTCTGCGCTGGGGCTGGCGTAGACGCCGGGGTCTGGCCCGGAGCCGCAGTCGTGGCCGCCGCAGTCCCCGGGTCTGAGGCAGAGGCTGGAGCCGGCGTTGGAGCTGGGACCGGCGCTGGAGCCGGAGCCGGCGCTGGCGCTGAAGCTGGGGTTGCGGCCGGGGCTGAGACCGAGGTTGGGGCCGCGGCCGGGGCGGAGGCTGGGGCTGGGGTGGCGGCAGGAGCACTCGCCGGGGCTGCCGGTGTGGCCATCTTGTCGAGAGAGAAGGAATATATTCTCATTTATTGTGATTACTAGTGCATTTGCACA…	TTTATATGGCAATTTCTCCCCATCACTTAATTTTAACCCCACTGTATCATTTGGTTTTAAATTATATTTCTAGTGACAAAAGGGGCTGTTTTTTCTTTAACCCAGTATCACGATCAGTTTTGATTTAATATATTCTCTTTTTTTTTTTTTTTTTTTTTTTTTTTTTTTATAGTTTTTTTTTTTTTCTTTTTATTGTTTTCCAACCTTTTTATTTCCTTTTTTTTCTC
EIF3I	2:68977359-68986004	EIF3IL1	13:47902697-47902707	GCAGGATGGGCTTCATCCTGGCGTTGACGCGAGGGAAGCGGCCCCCTGGTTCTATTTCCTATTCTGTTCTACTCAGTTTGGGAGACTTCAGAACCTGGAATTAAAAAAAATTTTTTTTAATTTATTTATTCATGAGAAACACACAACAGAGAGAGAGAGAGAGAGAGGCAGAGACAAAGGCAGAGGGAGAAGCAGGGTCCATGTAGGGAGCCT	GATCTCGGAAAATAAAATAAATTGGAAAAAAAAAAAAAAAAAAAAAAAAAAAAAGAACCAGGGAAGATTCTAAGCAATGCTTTATACATTAAAAGATGTCTTCTTTATTCCCATATGATTTAAGGGTGTATCACCATCTAGAGTAGATACA
EIF3I	2:68977359-68986004	EIF3IL2	30:12682033-12682047	AAAAAAATGGCAGCAGGACCAGCACACCTCAGCAGTCCTCCTGGTCCCCTCCATGAGTGTTTTACACACTGGGTCACAACCCATTCATGACTCATGAAATCAATTTAGAGGACCGCCTCTGTGTTTAAAGAAATAAATACAATAGCATATTAATTTAAAATAATGCTTAGGCTTCCCTCGCGTCAACGCCAGGATGAAGCCCATCCTGCTGCAGGGCCATGA	AAAAAAAAAAAATAAAAAAATAAAATAAAATAAAATAATGCTTAAAATTAAATAGAACAGAAAATATGAGACATACCACACTCTAAGAGTATTATTCTGTGAATTTTTGTTTATATACAAGTATGTTCTGATTCATGATAAAAAACATATTTCTTAATTATAGGCTT
EIF3I	2:68977359-68986004	EIF3IL3	30:15657404-15657404	TGAAGCTGTGAGGGAAAAAAATGGCAGCAGGACCAGCACACCTCAGCAGTCCTGCTGGTACCCTCCATGAGTGTTTTACACACTGGGTCACAACCCATTCATGACTCATGAAATCAATTTAGAGGACCGCCTCTGTGTTTAAAGAAATAAATACAATAGCATATTAATTTAAAATAATGCTTAGGCTTCCCTCGCGTCAACGCCAGGATGAAGCCCATCCTGCTGCAGGGCCAT	AAAAAAAAAAAAAAAAATAAAATAAAATAAAATAATGCTTAAAATTAAATAGAACAGAAAATATGAGACATACCACACTCTAAGAGTATTATTCTGTGAATTTTTGTTTATATACAAGTATGTTCTGATTCATGATAAAAAACATATTTCTTAATTATAGGCTTATAATAGCAAAGTATTAAAAA
EIF3J	30:11207620-11233106	EIF3JL1	15:21916417-21916432	CCCCGCCGCCGCCGCCGCCGCCGCCGCCATCTCGAACCGGGCGTGAGCGTCTGATATTTTGTTTATATTGAGGCCATGTTTGAAAATCACATAAAGGCTATGGGACCTGCATGTCACGGTAGGCTTGCCTGATTTTAGGGGGGGAAGCCATTCCTGTTTCTATTTGGTACACTGTATTTGCAAAGCTCTGTTACCTGGAAAAACCA	AAAAAAAAAAAAACAAAATATCAGTATGATAGTACTTGGAAAGTCAGTGACCTCAAACAGAGCGTACATCTCTCCTCAGAATCTAAGTTAAACATAGATGTTGATTTTATATTAGGCAAGTATTTCAAAGGCTGTCTGCATTCTCTCTTGATGGCTTAAGCTGTTCAAAAATGTGTTCTATCTTCAAAACATATAACTA
EIF3J	30:11207620-11233106	EIF3JL2	36:668349-668364	ACCGGGTCTTCCACGGAGAACGTGTCCGCGTCCCAGGAATCAGAGTCCCCCGCCGCCGCCGCCGCCGCCGCCGCCATCTCGAACCGGGCGTGAGCGTGTGTCGGACTTAAGAATTCTGATGTCACACAGCATGTATTAGTCTCGGGGAAAAAAATCACACTGTACCCCAATTTCTAACTTTTTCACGTGGTGCTTTCTTAATCTGGGTTCATGCCTTCTATTTATTAGATATTTTATGAATTCTCACTGTTTTGCTCCTTCACATATATAGATCTCACTCTGTAA	TTCTAGAACTGCAATTTGATGATTTGCTTGGGGGATTTGCATCAAGAAAGTCATTCAGAGGACTTAAGAATTTTTTTTTTTTTTTTTTTTTTTTCCTCAC
EIF3K	1:114433373-114443911	EIF3KL1	23:9681614-9681630	AAAGTTGAGTTTCTAGGGAAGCAAAACTCTTCCAAGCACTCAGCTCCACAAAGAATTTTGTCACCTGCAGAAGTCCTTCGACATGGGGTGGGGGTGGGGGGGGACATTCCTTCCACCTGTTGCCATTTGCAAAAAAAAAAAAAAATGTGCTTGCTAAAAATAACGATAGCATTTTTTTTTTTAAATCAACAAATCTTTATTAAACACCTGCCAGGTTACTGGGAGGAGGCCATAATGCTGGACACACTGTCAAAGTCGATCTTCTCCACGATGTTCTTGGGCTTGATGCTCTCCTCTTGGCTACAGATGAAGATCTGGCCTGACTCATCTAGCATTTTTATTTTTAAATCACATGAGCTTGTACTTGTCTCACTGTTGTGGTTAAAATCAAAGGCTTTT…	AAAGTTGAGTTTCTAGGGAAGCAAAACTCTTCCAAGCACTCAGCTCCACAAAGAATTTTGTCACCTGCAGAAGTCCTTCGACATGGGGTGGGGGTGGGGGGGGACATTCCTTCCACCTGTTGCCATTTGCAAAAAAAAAAAAAAATGTGCTTGCTAAAAATAACGATAGCATTTTTTTTTTTAAATCAACAAATCTTTATTAAACACCTGCCAGGTTACTGGGAGGAGGCCATAATGCTGGACACACTGTCAAAGTCGATCTTCTCCACGATGTTCTTGGGCTTGATGCTCTCCTCTTGGCTACAGATGAAGATCTGGCCTGACTCATCTAGCATTTTTATTTTTAAATCACATGAGCTTGTACTTGTCTCACTGTTGTGGTTAAAATCAAAGGCTTTT…
EIF3L	10:26757639-26784908	EIF3LL1	7:34555356-34555372	ATAAGCAGCCTCGGACTCGTAATCATCAGCGGGGTAAGACATGGCTTCTGGGCTCACGAGCACCCCCGGAGCTAATTTTGAAATTTTTATTCCCAGTTCCTTTTGGTTTTCATGAATTGTTTTCAAAATCAAAATGACTTTCAGTTTTTTTTTGTTCAGGTTTATTGAGAAATAATTGACATACATCACCATCTAGGTTTAAGATGTAGAGCC	TTTTTCATATTCCCCATATTTGTTTTTAATTGGAATTTTGCTGGAGAGTGGAATAGCACTTTATTAAATGAGGCTTCTAATACTCGTTTGTCTCATTTTTTATGTGTTCCCAGTTCTTGTTTTAATTTTGAAATTTTTTTTTTTTTTTTTTTTTTTTTTTTTTTGTTTTTTTCCAAAGAAGATCTTTTACTGAGACTTATTTAAAATTCCTAATTTTT
EIF4A1	9:24248428-24249949	EIF4A1L1	27:18306895-18306912	NA	NA
EIF4B	27:2118233-2150455	EIF4BL1	4:54523013-54523030	CAATTTTAAGAAATATTCCATGGTGTAACATTGATACTCTTAAAGCCATCAACCATATGACTGATTATGTATTATCACTATCAAAAAAAAAAGTGATGGCTTTGCGTTCTCTCTCCCTCTCCCAACATGGCGGCCTCAGCAAAAAAGAAGAAAAAGAAG	GAAAATTCGAAAGCAAAACAAACCCCTATCCAGACAAAACAAAAAAACTCCCCATCTCCCGGAAAAAAAAAAAAAAAAAAAGTGATGAATCAGTTTTACCTTGTTAAAAAGCAAAACCAAAACCAAAAACACTTCTTCCTCCTCCTCCCTTAGAAGAGA
EIF4B	27:2118233-2150455	EIF4BL2	12:49183637-49183651	TTTGCTGAGGCCGCCATGTTGGGAGAGGGAGAGAGAACGCAAAGGTGGCCTGGAGTTTTAACTACAAATTCAATTTTTTAAAAAAATTCTCAAATTTATTGGCACCAAGTTGTACATAATATTTCCTTAATTTTCTTTTAATATCAGTAGAATCTGTATTGAAGCTCACTTTCCTGATATGGGGAATTTGTGTCATCTTTTTTTTTTTTCT	AAAAAAAAAAAAAAAAAAAAAAAAAAAAAACTCCAGGCCAAGGAGACTTCACAGATAAATTCTACCAAATATTTAAGGAAGAAATTATACCAATTCTACAAAATTTCTTCTAGAAAACTGAAGAGGAAGAACTATTTTCCAACTTATTTTGTGAGACCAGCATTACCCTGATTAAAAATATATATACGAAAAGAAAACTACA
EIF4B	27:2118233-2150455	EIF4BL3	18:16670414-16670429	TTGCTGAGGCCGCCATGTTGGGAGAGGGAGAGAGAACGCCTTTGTACAGTTTTCTATTGCTATGCAATCTGTCTCTCCAAAACTTGTGTCTCCAAACAAAAGCAACAACGATGGACTTTCTCATGGTTTGTGGATTATCTGGGTAGTTCTGCTGCTGCTCTATCTAGGATCCATCATGTAACTCCATATAATCAGTGGGTTGGTGGGATCCCTGGGTGGCGCA	CAGATACATTACTTTTTAAAAAAAAAAATCATCCTTACCCTTTGTTTCTATTACTGAGTACAGCCTAGGATAATATTTGTACAGTTTTCTTTTTTTTTTTTTTTTTTTTTTTTTTTTTTTTTTTTTTTTTTCTGAG
EIF4B	27:2118233-2150455	EIF4BL4	20:46772328-46772345	TCTTCTTTTTTGCTGAGGCCGCCATGTTGGGAGAGGGAGAGAGAACGCCCGTATTTGGAGTTTCTTAACACAGCATAAGCCTTGTCCCATGTGGCAGCAAACTCTGCATATGCCATTTAATAAGATTTCATCTATCAGTTACCAACTCAAGACCACAATCTCTTCAACTATAACTCACTACCCGCTTCCTTTTTTTTTTTTAATACCCCCCTTCCTTTTCCTCATC	AAAAAAAAAAAAAAAAAAAAAAAAAAAAAAGAAACTCCAAATACGAAGCATACAGAACTGATTAATATGCACTCCAGCTTTAAGGCTCACTGCAGTGTTACCCTCAGATGCCTGCCTGTTCTCCAAATTAAAGCTGAGCCTCCTGGACACC
EIF4B	27:2118233-2150455	EIF4BL5	24:24189308-24189321	GTTTCATCAGCCCAGCTGACTGGTTTGGGGACATAGGTGCTTCCTCCCCCAGTCCCTCCATCCTCAGCCAGAAAGTCTGTTAGGGAGATAGTTTTCCCCTTCTTATTCTTCTTTTTTGCTGAGGCTGCCATGCTGGGAGAGGGAGAGAGCGAGACCTCAGTGTTAACCTGTATTTACTCTCTCTTCATCCCCACCTACAGAATATAGTATCTTTAGAATACTCTATTTCCACAGTCTTGCTTTTTTTCAAGATATGGTCACTCGTCTCTTTCTCTGTGGCAGGCATGAGGGTGTACCATGAGGTTCTACCTTCAAAGAAAGACTAGCCATTTTACTAC	CTAACTTAGCGCCGTTGAACTTGTATGCTCAATAAATGTAGCACCTGCTGCTGACCTCCAGACCCCCCCCCATTTGCATTGATTCTTGAAAATCATCTCCACCTTAATATTTTGCAGACATTTCTGAGTCAACATGTTCTAAATTAGATTCCTTATCTTTCTCCCCAAACCTATTCTCTCTCCTCTATGCTTACTATCAGTTAAACAGAATTACTATCAAATCATATTAGTGTAGAGACCTCAGTGTGTTTTTTTTTGTTTTTTTTTTTTTGTTTTTTTTTCCAGGAGATGGTGCCTCAGGCACACACTTCTCTA
EIF4B	27:2118233-2150455	EIF4BL6	33:19364340-19364354	NA	NA
EIF4E	32:21064202-21108998	EIF4EL1	4:4484518-4484531	TTCTTTTTTCTCTTCTTCTGTAGGCGGGGGATTAGGAGTAGGGGTGGTTTCCGGTTCCACAGTCGCCATCTTAGATCGATCTGAGAGTGGGAGATTATAAGCACTTTATGGATACAGTCCCCTGGTCCTGAGGGGTGGGGAATGTTTCATAGCTAGGACAGGTTAACATAAGTCACCTTGTGGGTAGAGGGCAGAGAGAAATAAGAGTTGGAAGTTGGGGCG	AACCTATAGTGTTTTTATATCTGTGTCCTTTCACTGACTCTCATATTATCGGTGAGCTTGTTTCTTGGTGGGCCTACTGAGCCTGTCCCTCTCTCTTCTCTGATGCCCTGGACAGAGTGGGAGATTTTTTTTTTTTTTTTTTTTTTTTTTTTTT
EIF4E	32:21064202-21108998	EIF4EL2	7:47107553-47107574	TTTTAGCTCTGAAACCCCAGGTAATATGAACAAGAACTGGAAGTGGAACGATAGGGAAAAAAAGAGGAATGTAATAATCCTGAGCTGACTGAAGAGTTAGACACCTGAATGTCTAATCTGGTGGCTTATATTGGGAATTTGCCAGGTCTTCCCCAGTTGATAAAGAATATTAAGGCAATTGAGATCGATCTAAGATGGCGACTGTGGAACCGGAAACCACCCCTACTCCTAATCCCC	AAAAAAAAAAAAAAAAAAAAAAAAAAAAAAGAATATTAAGGCAATTGAAATAAAAATACTTACAATGAGAATATGAAAGCAGTTTTGAAACGTTATGGCTTTGAGGAAGATCTTGTCTTATGGAATGTTATAAGAAAATGCAAAACTATGATAATTAAAACTGATGGGCAATGGTACATGAAAAATAATATTTTTTAAAGTACA
EIF4E	32:21064202-21108998	EIF4EL3	8:18679378-18679395	TATGTAGGAAAAAGAGGCAATATGTTTAGAAAGTATGCTACAGTTTTTGCTGGGGGGAAGGTAAATTGCAATAGCTGGTGATTCATTTTACATTTTAATTGAAATATAAAAAATATACATCTTATTGAAGCATAAAGTGTATCAATTATAAGTATAAAGTCTGATGACATTTTAAAATGTAAACATACCCACATTAGCAAAACCCAGATTAAGATGTAGAGTATGTTTCATGCCTCAGAAACTTCCCTTCTGAGATCGATCTAAGATGGCGACTGTGGAACCGGAAACCACCCCTACTCCTAATCCCCCGCCTACAGAAGA	TAAAAAATTGGAAACAGTGAATGTATTTTTAAAAAAAAAAAAAAAAAAAAGAAACTTCCTTTCTGCCTTTTCCAGGACTTAAAAAAAAAAAAAAATTTTGTGACTTTAAACACTTTGATCTTGGATTAATTTTACTTAATCTTGATATTTGTATAAATGGAATCATTTATTATCTGCTCTTTAT
EIF4E	32:21064202-21108998	EIF4EL4	12:33511003-33511017	TTCTCATCTTCCCACATAGGCTCAATACCATCCTTAAAAAGTGAGTAGTCACAGCCAGGCATTAAATTACTAGACAACTGGATGTGGTTGTACAGAGCCCAAAAGTCTTCAACAGTATCAAACTTAGAGATCAGCCGAAGGTTTGCTTGCCAAGTTTTGCTTTTATCATTTTTAAAAAACCAGAGTGCCCATCTGTTCTGTAAAGGATGTTTAATATAGTGTTCTGGGTTAGCAACCTCCTGATTAGATTCTGTTTTCTCTTCTTCTGTAGGCGGGGGATTAGGAGTAGGGGTGGTTTCCGGTTCCACAGTCGCCATCTTAGATCCTAGTCATTATTCCTATAACAGCACATTAAATATCTATGTTTTTTGATTTTCCATTTTTGACTCTAGATAATAC…	TTCTCATCTTCCCACATAGGCTCAATACCATCCTTAAAAAGTGAGTAGTCACAGCCAGGCATTAAATTACTAGACAACTGGATGTGGTTGTACAGAGCCCAAAAGTCTTCAACAGTATCAAACTTAGAGATCAGCCGAAGGTTTGCTTGCCAAGTTTTGCTTTTATCATTTTTAAAAAACCAGAGTGCCCATCTGTTCTGTAAAGGATGTTTAATATAGTGTTCTGGGTTAGCAACCTCCTGATTAGATTCTGTTTTCTCTTCTTCTGTAGGCGGGGGATTAGGAGTAGGGGTGGTTTCCGGTTCCACAGTCGCCATCTTAGATCCTAGTCATTATTCCTATAACAGCACATTAAATATCTATGTTTTTTGATTTTCCATTTTTGACTCTAGATAATAC…
EIF4E	32:21064202-21108998	EIF4EL5	13:49315949-49316008	NA	NA
EIF4E	32:21064202-21108998	EIF4EL6	27:13867053-13867076	AGTTGGTTTCACACAAATGATGAGGACAGCTGCATCTCTAATTTTTGTTGTGTCATGCTGGTAGCTTTTAGTCTGTGAAAATGATAAATATATATTGGATAATCTAATCACAGTCCAAGATACAAGTGTACTTTAGAACAAAAAAAGAAAAGCTAATGGATCTAAGATGGCGACTGTGGAACCGGAAACCACCCCTACTCCTAATCCCCCGCCT	GATTCCTGCAGCCCTGAATAAAATCCTATCTGAAGTTGATTTAATCACAACAATAGCTTTTATATTCAAATGGGTGGAGAATGTGGGTAGATCATTGCTGCTTTTCGTTGTGTGTCTGTGTCTGTCAGGGTTTACCATAACTAGCATATAACACGTATCCATTAGCTTTTCTCTTTTTTTTTTTTTTTTTTTTTTTTTTTTAAAAAA
EIF4E	32:21064202-21108998	EIF4EL7	28:11546283-11546297	TTTTCTTTTGAAGGCTTGGACATCCCTCATCTGTCTCTTGGCACCTTTCCCACTTCCCCAGAATCCTCGAGGAGTAAAGATCACATCTGCGAATATCTTGGGCTCACACATTCTTGCTATTCTTTGGCCTATGATGAATTAGGAGCTCCTTTGTTCTCTGCCCATTAGCTTGCAGGCCATTCCTTCTGTTGTAGGGAAAAAAGCACCCACGAGTTGAGTTTCTGTACTGCTGTGACATCTGTCCATGTTCTAGAAACCTGCTGTTAGAAATGCATCTTAGAGATCGATCTAAGATGGCGACTGTGGAACCGGAAACCACCCCTACTCCTAATCCCCCGCCTACAGAAGAAGAGAAAACAGAATCTAATCAGGAGGTTGCTAACCCAGAACACTATATTA…	ATTAATTTTTTAAAAAATTTTATTAAAATTATTAAAATTTTTAATTTTATTTTTACACACTAAAAAAAAAAAAAAAAAAAAAAAAAAAAAAAAAAAAAAAAAGAAATGCATCTTAACATAGGGAGAGTATGCAGAGAAGGCGCATCTGAGCAGGAGCGCCTTCTGAAGAGCTTTCTACTCACGACTGAGACACCCCTCCCCACGCCAGGTTCACGCTGTGTGAATCTATGCTGGAATCTGATGCAGGAT
EIF4E	32:21064202-21108998	EIF4EL8	31:11177825-11177839	NA	NA
EIF4E	32:21064202-21108998	EIF4EL9	38:7593530-7593545	GGGATTAGGAGTAGGGGTGGTTTCCGGTTCCACAGTCGCCATCTTAGATCGATCTGATATATATTCTTTTTATTAGGATTTTATTTATTTATTGAGAGAGAGCACAAGATCCTGAGGGGAGGTGGGGAGAAGGAGAAGCAGACTCCCCACTGAGCAGGGAGCCTGACACGGGCTCCATCCCAGGACCCTGAAATCATGACCTGGGTCAAA	AAAATGCAGTTATTTTTTCTTTTGATAATTTCTAAGATATTATGATATTAAAGATGATTTTAATTTAATAACAGACATATATACATTTATACATACATATGTATATACATACCCATATACATATATAATCTTATATATATTCTTTTTTTTTTTTGTCTAAAAGACAATTCACTGTACACATTTTATTTACAGTTTTG
EIF4H	6:6180189-6202835	EIF4HL1	10:6029579-6029594	NA	NA
ELAVL4	15:10885161-10975640	ELAVL4L1	2:59424256-59424269	NA	NA
ELK1	X:41256205-41270656	ELK1L1	12:18516395-18516411	NA	NA
ELOC	29:22452254-22476523	ELOCL1	4:55211009-55211024	CAAAACCTTCAACCCAGAGTTGCAAACTGAGGCCACATCTGCTACAGATGGGTTTAGTTTGGCCCAATCAGCACATGGCTTCAGCTCATGTTATGATTGGGGTCCTGGGATCAAGTCCTACTTAGGGCTCCTTGATCAGCAAAGAGTCTGCTTCTCCCTCTGCCCTCCCCCCACTTGTGCTGTCTCTTTCTGTCTGATAAAAATATTTTTTAAAATGTGTTTAAAGAGGGGCGCAGGCAGCTGGGGGTGGGGGGGCGGCCCTGGAGTAGGGGCTGTGGCGGTGCGCGGGGAGCCGGCGCGGTGGCTGCGGTGGCTGCAGGGCTGACGAGAAACTACTAAAGTTCCTGTCGAAGTAAAGTAGAATTTCG	AATATAAAAAAAAAAAAAAAAAAAAAAAAAAAAAAAAAAAAAAAAAAAAAAAAAAAAAAAATAAAATGTGTTTAAAAAATGTGTTTTAAGTTAAAACATTTTAAAATTGGGAAATTTCATATAATAGCCCAGATTCCTGCTTTTCCTGAAAATTCTAGTATTTGGCCACTCTGGGCCCACATTCTCACATGGCCCGGCCAGC
ELOC	29:22452254-22476523	ELOCL2	12:11614283-11614311	NA	NA
ELOC	29:22452254-22476523	ELOCL3	15:9768621-9768636	TTATGTGTTTTTTGATAAACTGCAGTATTGTTTAAGTGTAAAAAAAAAAAAAAAAAAAAAAAATTCCTAAGGAATCCACTAAAAAAACTATTAGAATAAATGAGTTCAGTAAGGTTGTAGGATACAAGGTCAATACACAAAAATTAACTGAACTTTACACTTGCAACAAATATATAAATGAAATTAAGAAACCCATTCCATTCAAATAACTAAAGAATAAAATACTTAAGAATAAATTTAACAAATAAG	CAGCCCTGCAGCCACCGCAGCCACCGCGCCGGCTCCCCGCGCACCGCCACCCCTTAGGAATTTTTATGCACTGTATAAGATCATGTCATCTATGATCATGTCATCTGTGACAGAGAGAGTTTTATCTCTTCCTTTCCAATATGCATGCCTTTTATATATTGTTCTTGTTTAATTTCCCTGGTTAAGGGCAGCCCCTGTGGCGCAGCGGTTTAGCGCCGCCTGCAGCCTGGGGTGTGATCCTG
ELOF1	20:49821968-49828052	ELOF1L1	15:399941-399954	CCCATGTCTGTAGGAGGACAAACACTCCTCTCCCCTCGTTGCGACGGCCTCGTTCCTCAGTACTGTTTTTGATGGTGTTAGCAACACCTTCCTGTCCCAGTTGGTGGAATCAGCTGACGGAAGTGGTAGTGTGTGGGTGCTGGCATCAGTGGTGAACTTGACAGTAGCCTTATTACCAGGCTGCTGGTAGTGGAGGTAATGGTCAGGTCACAGTGATACTGGAGATAATAGG	AAAAAAAAAAAAAAAAAAAAAAAAAAAAAACAGTACTGAGACTAACACTGACACCAATACCATTGTCATCACCACCAGCATGAAACGTCATTACAATCATTTTGACCAAAACCTACACAATCCTTCTACCAACCCCACCATCACTGTCACGACCATCCAAGATAATCATCAATTTCTACCTATAACATGACCATCATATTCAACACCAGCACCACCATT
ELOF1	20:49821968-49828052	ELOF1L2	15:3569062-3569078	CAAAGCAACCAAGTCTCCAAGTTGTGGATTTAGTTGACCTAGGATCTCTTGGATCCCCAGCTATCTCTGTGGGAAACTGTTGTGGAATAAACAATTCTTTATTAGTTAAGAATACTGTTGGTCCAATCTTAAAAGAGGTTTGTTAAGGTTGTTAGCATCTGGGAAGCCGCTGTCTCCCGGGTGAACGAGGCCGTCGCAACG	CCTAAAAAAAACGGCGGAAGAAAAAAAAAAAAAAAAAAAAAAAAAAGGTTGTTAGCATCTGTAATTATAAATAAGCTAATTTAGAATGCAAACCTACAAACCCAAGAGTTCTGGGCATATGCTAGAACTGTCAAAAAGAAAAATCTAGGGGTACCTGGGTGGCTCAGTCAGTTAAGCATCTGCCTTCCACTCGGGTCATGATCGGC
EMC4	30:860769-864681	EMC4L1	19:30414403-30416042	NA	NA
EMC6	9:47497354-47498861	EMC6L1	1:88398840-88398856	ATTCAGGATAGATTTGTTGAGCTTTTAATTCATTATGGGACACAGAATTCTCTTAATGATATAGCTTGATATCCTCATTTTTAAAAAATAAAAACTGTCTATTGGGGTTCCAGGGTGACTTAGTGGGTTAAGCATCCAACTCTTGTATCAGCTCAAGATCATAATCTGAGGCAAGATGGCGCCGGGCGGGTCTGTGCCGCTGGCCGTCTGAAGGAACGCCGCGTGTCTGTGTCTGTGTCCGCCGCCGTGTTGCAGCTCCGCGGGAAAGTA	AAAAAAAAAAAAAAAAAAAAAAAAAAAAAAGATCATAATCTGAGAGTCATGAGATCAAGCGCAGTGTCAGGATTTGCACTGAGTGTGAAATGTGAAACCTGATTGGGATTCTCTTTCTCTCTCTCTCTTTCTTTCTCTGTCTGCCCTTCCCTCCCCACTCTCACACTCTCTCTGTCACTCTTTAATTAATTGATTGATTAATTAAT
EMC9	8:4133997-4136144	EMC9L1	37:14690461-14690475	NA	NA
ENAH	7:39105024-39250126	ENAHL1	5:76095534-76095534	NA	NA
ENO1	5:62300805-62314508	ENO1L1	6:44720874-44720896	AAGAAAGAAAGAAAGAAAGAAAGAAAGAAAAAAAGAAAAAAGGATTACCAAGTGTCATAAGGCCACATCAACATCAAATATGCTGGTTCTCTTTGCTGTAATCAAGTGTCTGAAAGAAAAGTGTAAAGAAATACTCAGCGAGGCAGGAAGTCGGGGCCGGCGGCGCTGAGACGAGCTTCGGGTCCTCGGAGCGT	AAAAAAAAAAAAAAAAAAAAAAAAAAAAAAGAAATACTCAGCGAGACAGTTCTGCTTAATGTTGTAGGAGGAACATGATCAATTTTCTTGTTGAACTTGGTGTTACTGTTTTGAGGCAGGGGTAGGAGATAATTCCAGAAGCACTAAGAACAATCCCCGGTGTCAGAGAGTTCATTTTAGAAAGCTATTACAGAAATGCAAGCAGGAAGGAGATAAAA
ENO3	5:31662284-31667498	ENO3L1	1:33482556-33482687	NA	NA
ENO3	5:31662284-31667498	ENO3L2	5:70018506-70018521	TGGCAAATTGAACACCAATAAAAAAATAAATTTATTATTAAAAAAAAAAAGAAAGAACATCTTATGAAATGCCTTGCTTCAAAACTTAGAAAGCGACACTGTCCCAGCTGCCACCTAGGCTCAGAGCTCACCTCAACCCCCCCAGC	GAGCGGCTGGCCAAGTACAACCAGCTCATGAGGATTGAAGAGGCTCTCGGGGACAAGGCTGTCTTTGCCGGACGCAAGTTCCGTAACCCGAAGGCCAAGTGAGAAGCTGGACGCCCCAAGACCCCATGGGACCCATCTGGGCCCTCAAGCCCTTCTCTGGGAAATAAAACAGTGGTGGCTACTGAGAAAAAAAAAAACAAAAAACAAAAAACAAAACTTAGAAAGCTATGAACTTTCACTTAGATTTTCCCATGATGTGTCCTAGGAGGAAGGGCATAGTGGACCCAATCTTAAAAACATGAAATTTAACAGGGTTTTCATTTTGATACAAATAAAATGTCTTGTAAGGATAGGGAGAGCTGAGCCTTACCAGATGGTATAAAAAAGACTTAGGAA
ENOPH1	32:6408778-6451606	ENOPH1L1	1:100882258-100882373	NA	NA
ENPP3	12:97426-195939	ENPP3L1	23:38828467-38828479	NA	NA
ENSA	17:59800822-59807884	ENSAL1	35:10793872-10793885	CAGGAGGAAGTCGGGGCCTCCAGGCTTTTGTCCTAGGCTTGGATATTTGGCCTTTAGCTTTGCCTCCTCGGCTCTCTCAGGGAGAATACCTTCTTTCTCCTGTGTGTCCTGCTTCTCCTCGCCGGTCTCCTCCGCAGGGTTCTCCTCTTCTTGTTTCTGGGACATGGCGGGACCAGGGCTGTGGAATGTGAGGGGCCCGGGAAATCGATCGGAGAAGGGAAGGGGGAGGGGAAACGGGGACAACCTGCTCTGCTTCTTCGGCTCCGGCAAAATATTTAAACAGACACTTGACAACACAGCTGTTGGCAATGGACAATGTTTGGTAGTTTCTTATAAAATTACCCACGAAAAATAAAAACATATATCCCCCTAAAACTTGTAAATGCATGCTAATAATAG…	AGATAAAAGAAACTGTCCATCTAAATATGACAGATGCAAACAGCTCTTCTGGTTCTGCAGAGCCAAGTTGAGAACACAATTAATGTTAATTGTTCATTGAAGAAAGTGCTGTCTTTGAAATAGATTTGCTGTGGGGAGAAGGGCAGTAAGTGTGGGGGAAAGGGGGCCATGAGCGTGGGGAGCCCCACAGAGCCCAAGGGATTTTTTCAGTATTTGAAATAAAAAAAAAAAGAAGACGACCCACAAAAAAACACAACCCAGAAAAAAATAAAAATAAAAAAAAAATAAAATAAATATTTTGCCCATTTAAGAAATTGCATTATCTTTTAATTATCGAGTTGTAACAATTCTTATGTATTTTGGGTACCGTCTTTTATCAGATACATGTTTTGTAAATAC…
EPHA8	2:76703538-76739327	EPHA8L1	15:58756431-58756445	NA	NA
EPSTI1	22:7862068-7956077	EPSTI1L1	30:15796199-15796207	GAGGGCGATCCCCAAGGGTTTTAACAGCTCGAGTTTCGATTTCCCGCCCCTTCTATGTGTGTTCTCCAAAGTTCTCACACAAGTACTAAAGATTTGCTACAGTTCATACTGGTAGGAATT	TATACACACCCAGTAACCTTAGGGGATAAATAAGCCATATTTTCCAGATGTTGATTGAGGCATGGAGAATTGGGACCAATTTCATTTTTACAAGAAAAAATCAGCAGAATAGAAAGGAACAGATAAGATAAGCATCCCTTCTTCTTTTTTTTTTTTTAGAAGTATTTCAAAATTTATTTGTAAATGTATATAAAAGAGG
ERG28	8:48642610-48651637	ERG28L1	12:17961836-17961850	AAAACAGCTTTTACATTTCTGCAGAATTTAGTTTCTAGCTCTCTTCAACCAAACACTTCTAAAATGCTTACACTCTGTTGCATTAAGAACAAATATAGGCTGCTGCCGCCGGGGCTCCCGC	TGACACACAGAATAGTAGGCATAACAAATTCTTTTATTTCATCATTTAAGAACAAATATAATCTTTTTATATAGCAAAATCCTATATCTCTTTAA
ERH	8:43211168-43225307	ERHL1	4:24113288-24113300	ACATCCCTCTCTTTCTCCCCCCTCTAAAAATAAATAAAAGAGAATGACAGATTTATATTTTTTATTGCTTTCTGTGAGACTAGAATTAGGTGATCCTGCAGTGTACTTGAGAGATATTTCACATTCTTACTGCTTTCTAGGAGTTTCAGCCTAATTTACGAAAATTTAAGGTCGGCAGCGGCTGCGGCGAGAGAGTTTGGCGCGATGTCTCACACCATTTTGCTGGTACAGCCTACCAAGAGGC	ATTCAATTACATCTTGCACCCTCCTAAAAATTACTTCAAATAGCATTATCATTATGAATATTAGCCAACATGTCTCTAGAACAGGGCTTAAATTTTCTTTTTTTTTTTTTTTTTTTTTTTTTTTTTTTTTAAAAAAAAAAAT
ERH	8:43211168-43225307	ERHL2	21:24481991-24482009	ATGAACAGAACAAAACACAAAAATGTACGATCATTTCAACAGACACAGAAAAACATCTGACAAAATCCAACACTTGTGAGAAAAATACTCAGCAAACTAGTAATAGGAAGGAACTTCCTCAACCTGACAAAGCTAACATCATACATACTGGAAGACAGAATAAGATCAGGAACAAGGGTTTCTGACGACTTCCGGCGGCTCCTCTCGCGGGGATTGGCTGTTGGCG	AAAAAAAAAAAAAAAAAAAAAAAAAAAAAAGATCAGGAACAAGGATGTCCACTCTTACCACTTGTATTCAACTTTGTATTTGAGGTTCTATTCAGACCAATTAGGAAGGAAAAGAAATAAAGCCACCCAGGTGCCTCTGTATTCTGTAACCTTATGAACTAATTTATTATTAGTTCTAATTGTGTGTGTGTGTGTGTGTGTGTGTGTATGTGTG
ERLEC1	10:54815592-54845776	ERLEC1L1	4:53617740-53617754	TGATTATTTTTCTCCAGGAGCCTGGGGTCTCAATATTGGAATTCCAGTGTCTGAGGCTTCCCAACCAAGTTTAACACACTACTTCCATTCCAGGCTACAATCATGGTGCTTTCTCTGCTTTAAACATAACTCAAGGCCCGGCTCTCCGGAAGGAGACGTGGCGGCGGTTGGGCCCC	AATGAAAAAAATGTTCAAAAGCAGTTTTTTCATGTAAAAAAAAAAAAAAAAAAAAATAAACATAACTCAAAAGATTTTACCCATCCTTTAAGATTCAAGCCTTCCAGTGCCATCAAGCTTTAGCCAATTTCTTCTTTGGTGCTCCCTTAAAGTATTTGTCATTTTTAGAACAGATTAATATCATACATGCATTTTTTTTACTTCCTAGTAAAATATGATCTATTAAAGTAC
ESCO2	25:29785641-29812536	ESCO2L1	1:59290407-59290424	TAATATTTAAATATTTAATTTATTTGGGGGGGGTATGTGCAAGCAGGTGGAGGGGCAGAGAGAGAGGGGGAGAAACAGAATGTGAAACAGACTCTGCTCTGAGCATAGAGCCAACACGGGCCTTGATTCCACAGACCTCAAGATCATGACCCCAGTCAGTTGGGTGTCTAAATGTTTAATTAAAAATTATAAAAATTAGGCCACAAAAGAGTTTAATTTCTAAATGTCAACCAAAATACAAATGCATCA	TATTTTTTCTACCTGCACTTTTCCCCATTCTTTTCTAAATGTAAAATCTTATCCTGTTCCTGGGTGTTTTTATTTTTTTAATTTTTTTTTTTTTTTTTTTTTTT
ESCO2	25:29785641-29812536	ESCO2L2	22:41457183-41457199	GAAAAAATCTGCTAGATATAAATATCATGAAATTGGCACTTGGTAATGGGTATAAGAAGAATTATGTTTTTTTCTATCAAAACTTCAAAAGAAGACTCAGGTAGGTGCTGCGCGGGGCTGCGGGGTGGAGGCGTGG	AAGAAGAATTATGTTTTTTTTTTTTTTTTCTTCAAAAGAAGTAAGCTTCAGAAAGGGATCACATTTTCCTATGAGTTACTGAAACTTGGCTTTTTAATTTGATGAACCATGGCAGAAAATACTTTGATGTAAAAATATAATCACTAACCTT
ESD	22:4544657-4569986	ESDL1	1:102105336-102105352	GATGGACAGGGGATCCTCGCGATCGGCGGCGGCGGCGGCGGGACCCCGAGCTGCCAAGAATACTTTGTCTCAAGGCTCACGGCCTGTCCCACTTGGATGTCTGGCACTGCATCTGGAGGCCTTCAAGCAATCTAGCAGTCTGCCAGCACCAGCCAGTCCAGCGCTGGGCTTCCTGAATGTGTTCCTTCTGC	AAAAAAAAAAAAAAAAAAAAGAGACAAAGTATTCTTTTTTTCTGTATGTATTTTTAAGATTCCACCCACTTGAGAGAGAAAAAGAAAGAGCACACAAGCAGGAGAAGTAGCAGAGGCAGAAGGAGGAGCAGATTCGCTGCTGAGCAAGGCTCAATCCCAGGACCCCA
ESD	22:4544657-4569986	ESDL2	12:28925580-28925664	NA	NA
ESR1	1:42081952-42368544	ESR1L1	22:10782957-10782972	NA	NA
EWSR1	26:22578782-22608174	EWSR1L1	7:34021565-34021582	TCTCTCCTTCCCTCTCGTTCTCTAAATGAGATAATATACATGAAGTTCTTACCTCTATGCCCAGTCCAGTAAGAACTCAATAAATATTTACTATTAGTATTTTAGTATGTAATCTCTGATTAGTCTCTGTAATATCCATGTTGATCCTTCTGCTGTTCTCAAGTTTTCCTAGATTTTTTACAGTCACTTGTGGAGTTCCT	AAATAAAAAAAAAAAAAAAAAAAAAAAAATATATATATATATATATATATTATCTCATTTATTCTAAAAAAATCATGTGAAGTGGATATTATTACCTTCATTTTACAGAAGAAAGAACAGAGGCTTAGATATGTTAGTTAACTTGCCCAGATCATACAATGGAGACTTTTCTGATGCTCTTGAACACTTCTGTAGGAAAACATATGAATAAATCCTTAGGGAATGACAGAGGGATCCCTGGGT
EWSR1	26:22578782-22608174	EWSR1L2	10:12992344-12992361	AAATGGATGGAGAAATGAGGAGTGATGGATAATGGATGGAAGGTTTCTTGGGGGGGATGAAAACGTTTCTAAAATTAGATTATAGAGGATGGTTGTGCAATTTTACAAATATGCTAAAAAACTACTTTAAACAGGTGAACTTGAGACGGACGTTGAGAGAACGAGAGGGAAGGAGAGAAAAT	AATTTTTAAAAAAAAAAAAAAAAAAAAAAAAATAAACAGGTGAACTTTGTAACACTAAACTGTATCTCAACACGCCTTCTGCTAGAAGAGTCACTCACCACCAGCAGGGGGGGCTAACACAATAGCTTTACCCAGTCTCTGCTCCCAGTTCTGTTTCCTGGGAGGACAGAAAAAGAATTATGTCCAAATTCAGAGAAAATAAAGGATAGATGACTTTTTTTCATCTTT
EWSR1	26:22578782-22608174	EWSR1L3	12:32336527-32336541	ATATACAATATAACATGCTAATCTATATACATTTAACATAAAATATAAAGTAGTGGATTAAAGAAAAAGTGATAAACTAAAGATTCAGAAATAGAAATAGAGCATTGGTTCTCAATAATCTTTAAAGAGAGAAATGCTCTTTAAAAGTCCAACTTCGGCGGCGCCTAGAGGGAAAGCGAGAGGGAGACGGACGTTGAGAGAACGAGAGGGAAGGAGAGAAAATGGCGTCCA	CAAATAGAAAGCAAAGGCAGAGATCATTATATTGGTATGTAAAATAAAGGTACATCTTACAGTATATACCAAAGGTATACAGTGGTATAGACTCAATGAAACATAGTATCACATAGAAGGCTGAGGAAGTTGGACTTTTTTTTTTTTTTTTATTAACCTTTCGAATTTTATTAAAAAAAAACAACCCACACCACCAT
EWSR1	26:22578782-22608174	EWSR1L4	18:22847821-22847853	NA	NA
EWSR1	26:22578782-22608174	EWSR1L5	32:27326109-27326128	TAATCTTAAATGTATTTATGATTTTAAATGTAATCTTAAAGAATGCTTAATTAACTGAAGAAAAAACTGAAAAGGATAAAGCATAAAATAATAGATGGAACAAATAAAGATTTTAATCCAGCCATATAAATAATTCCATTAAATGTAAACAGTCTGAACACAGAGAACTTAGAAACACCAATTAAAAGATTGTCGAATTTGAGGGAAGGAGAGAAAATGGCGTCCACGGATTACAGTACCTACA	TTTTGTTAAATAAAATTCCAAATGTTTATAAACAAAAAAAACAAAAAAAAAAGATTGTCGAATTTATTTTTTAAAAAAAGGATGGCTCAACTGATGGCTGTCTATAAGAAACTCACTTGAAATATATGCATCAACAGGTTAAAAGTAAAAGGAGAGAAAAAATAATGCTAAAGAAATTGTAATCAAATAAAGTTGGAGTAACTATCTTAATATTTTTATATTTATATTAATAAAAGTAAGCTTCAGGGCAA
EWSR1	26:22578782-22608174	EWSR1L6	33:16687235-16687252	ACGGGCAGATGCAGTGTGGGGAGCCTCTTCTTGTTTGATCCTGTCTGAGCACACCTGGGAGTGACTCAGTAACTGTCTTTAGGAATACCAAGGTTGGAACGAGAGGGAAGGAGAGAAAATGGCGTCCACGGATTACAGTACCTACT	ATAAATAAAATTCCAAATGTTTATAAAAAAAAAAAAAAAAGGAATACCAAGGTTGAATGAGAATGCTGATTCATTTCTTCTTTATCTAAATAATCTGAATAATGCTTTAAATAAACTATGTCATCG
EWSR1	26:22578782-22608174	EWSR1L7	34:36713192-36713313	NA	NA
EXOC6	28:7190918-7414367	EXOC6L1	13:56539776-56539792	NA	NA
EXOSC1	28:10729186-10738978	EXOSC1L1	X:43705948-43705965	CACTTGAACACTTGGAGGCCATGGTAGGGTTATTACTTGGCCTAATTTCAATATTTTTGTGTCTCAAATAGGGAATAGGGAGACCTGAGGAAAGGGAGAGAGGTGCGGCTGGGATGAGGACGGCACCCCAAAATGATTACAATAGTAACATCAAAGATAACTGATTATAGATCACCATAGAAATAGAATAATAATTAAAAAGTTCAAAATACTGTGAGGGGGGCATCCCGGGTAAGTGTGCGGGGACCGAAGCGAATTCTGGATGGGACAGGGAGGCAGGAAGGCTGCATGACCGACACCCTCTGAAGACCCATGACTGATGCAGCGTTTCTCTTCAGGCGAACGTCTGTGTAACTTGGAGGAGGGCAGCCCGGGCAGCGGCACTTATACTCGCCACGG…	GGCGCCAGCTTTCGGCCCAGGGCTCGTTACTCGAGCCCCGGTATCGAATCCCACGTCGGGCTCCCGGTGCATCGAACCTGATTCTCCTTCTGCCTATGTCTCTTCCTCTCTCTCTCTCTCTCTCTGTGTGACTATCATAAATAAATAAAAA
FAM118A	10:20713549-20737569	FAM118AL1	1:102769169-102769246	NA	NA
FAM118B	5:8253655-8300341	FAM118BL1	22:49632939-49632952	NA	NA
FAM126A	14:36594263-36718960	FAM126AL1	28:2232167-2232181	NA	NA
FAM133B	14:18145882-18168367	FAM133BL1	8:24238817-24238833	NA	NA
FAM133B	14:18145882-18168367	FAM133BL2	17:62739997-62740013	TGCATTGATCAATACTGGTTTCTCTTCAGATAACATAAATCTTGGGATGCCTGGGTAGCTTAGTGGTTGAGTGTCTGCCTTTGGCTCAGGGCATGATCCTGGGGTCCTGGGATCGAGTCCCACATCGGGCTCCCTGCATGGAACCTGCTTCTCCCTCTGCCTGTGTCTCTGCCTCTCTCTGTGTGTCTCTCATAAATAAATAAATAAAATCTTAAAAAAAAAAGATGATATAAATCTTTTGCCTTTTACATTGCATTGATCAGTTGTACAAAAGCTAGTTAATACTGATAGACACTTTTAGCATTTATTGTTTGCTGGAGTAAGTTATGTCTAGCTATTACATATATGAAAAGGAATCTAAACTCTTATTAGATACTACTTTTATACCAGTTTTTTTAT…	GCCTTTGGCTCAGGGCATGATCCTGGGGTCCTGGGATCGAGTCCCACATCGGGCTCCCTGCATGGAACCTGCTTCTCCCTCTGCCTGTGTCTCTGCCTCTCTCCGTGTGTCTCTCATAAATAAATAAATAAAATCTTAAAAAAAAAAAGAGAATCCGTTCTTGACTGTGGGCTCCGGACCCCAAAATGACGAGCCATTCTGTCTGGTA
FAM133B	14:18145882-18168367	FAM133BL3	26:7406518-7406534	GTGTGTTGGGCATCTGACTCCTGATTTTGGCTTAGGCATGATCTCGGGCTCATAGGATTGGAGTCTGACTCAGGCTGTGCACTCAGCAGGGAGTGTGTTCGAGATTCTCTCTCTCTCTCCCTCTCTCCCTCTGCCCCTCCCTCCCTCTCTCAAATACATAAATAAATCTTTTTTAAAAAAATAAAAATAGATGGGGAAGCGGGACAATCGGGTGGCCTATATGAACCCAATAGCAATGGCCA	AAAAAAAAAAAAAAAAAAAAAAAATAAAAATAAAGTAGGCTTCACACCCAACATGGGGCTTGAACTCACAATCCTGAGATCGAGAGTCACATGCTCTTCTGACGGAGCCAGCCAAGCAACCTGGTTCACTAAGAGTTTTAAAGAATTTTAAATTAGTTACTGATATAGCTGACACACTCAATAGGATATTTAAGGGGTATTTGATGAAAGGTCTGTTTACAGAGTC
FAM133B	14:18145882-18168367	FAM133BL4	29:31980926-31981012	GCACAAAACATTTTGGCATGACAAGAGGCTGAATAAATAGCTATTTTACTTAAAAAAAAAAAAAAAATAATATAGGGCATAGCAAGAAAAAAAGGGACTCATCAACTCTATCCTCTTTCCC	CTTTTCTTTTCTTTTCTTTTCTTTTCTTTTCTTTTCTTTTCTTTTCTTTTTNTTTCTTTTATTTTAAATCATATGGTGCAAAGCAAGAAAAAAAAGGAACTCATAACGTC
FAM151B	3:26614337-26646997	FAM151BL1	1:61951583-61951600	NA	NA
FAM168B	19:20734167-20775792	FAM168BL1	11:67594148-67594225	NA	NA
FAM168B	19:20734167-20775792	FAM168BL2	16:34984194-34984211	NA	NA
FAM32A	20:46292497-46297991	FAM32AL1	22:61136904-61137160	NA	NA
FAM91A1	13:22036518-22082278	FAM91A1L1	1:102565442-102565442	NA	NA
FAN1	3:38013744-38052619	FAN1L1	19:18427148-18427167	TCAGTCTGCACTTGGGGCAAGAATCAGCCTGGAATCGGTGCAGTGATTTTGAAACATTGCCTTTGATCCCTTTCTTAAAATCAAGCGTAAGGGGAAAAAGCAACACTGTAAATAATTTAAGTTATATGCACAGAGGTAGAAGTTTTGATAATGAAATAAAGATTTTACCAATATGATTTAGGTTTTTGTTGTTCTTTAATGCTCCCATGACTATGACTCCCTGC	CCTCCGCCCTCCGCCCGGCCGCCTCTAGTCGCCAGCGCTCCCCCATGCGGCCCGCACCCCCGGACCCCGCGCCCCGGCCGGCCGCCCCAGGCTTCAAAGGCAATGTTTCAAAGCCAATATGAATTTAAGACTTCGGACTTAATTTTCACTGTTTTTGATGGAATTGGAGCAAAGGTATGAATTAAGGGCTTGAGATCTTATTTCTCACCCCCTGGTGTTTTTGTTTGTATCCCTCAGTCTTCTTGGA
FAR2	27:18659688-18791757	FAR2L1	27:599295-599306	NA	NA
FARSB	37:28647114-28716193	FARSBL1	15:1203210-1203224	AAAACCAGCCCTAGAGAGTTAAAAGCTTGTCTGTTAAAAAGACAAGGAGTAGCAAAGGGGTAAATATAAGATTAATATCAAAAAGTAAAGCCAATCTATTGTAAAAAATGAACACTTCACATTTCATGTCAAAAAGAGTCTGTCGGCAGTGGGGCCTGACTCGCCATGCCGACTGTCAGCGTGAAGC	TGTCCAGTTGCCCGAATGCACGACAGTAAGACAAAAATGGTTTGATGTAAAACTTAATTCAGAGCAAATCAAGACCGAAGACAGACTCTTTTTTTTTTTTTTTTTTTTTTTTTTTTTGGTTTTTTTCTTTTTTTAAAC
FARSB	37:28647114-28716193	FARSBL2	21:14758136-14758153	CAAATACATGAGACAAAGTTGAACAAATACTTTGGTTCACTGATTTGGGTTAGATTGGTTTCTTAGATTAAATATCCCTCAAGTGCAGAGTCTTCCTTTTGCCACAAGGTGGCAAGCTAAGCATCCTGAAATTTAAAGCTCAGCGCTGAAGTCTTTATGAAAGGGATTGTTCTTAGAAAGTTTATAAAGCGGCAGTGGGGCCTGACTCGCCATGCCGACTGTCAGCGTGAAGC	AAAAAAAAAAAAAAAAAAAAAAAAAAAAAAGAAAGTTTATAAAGCAAGAATTTATTCCCTAGTAGGTTCTTATGGATGCAATATTCATGCTTCGTGTATATTGTAATATCTTAATGTTTACCTATTTCTCCCTCTATAAAGGAATAATCAAAAGTCCTTTTTCTTTTTTCTTTAATGAAACTCAGAACCTCTCAGGGCTCTATAAGCACCCTTATT
FARSB	37:28647114-28716193	FARSBL3	37:10908716-10908725	TTTCCCTACACGACGCTCTTCCGATCTAGCAATCTCCTCAACCTCGTTAGATTGCTAGATCGCTTCACGCTGACAGTCGGCATGGCGAGTCAGGCCCCACTGCCTGTTTTTGGTTTTTAATGTGTCTGTGTATGTATGCTTTCCAGAAGGTGGTTCCCCTTGCCCAAGCCACGAAGCCTTCACGAATGTCTGGAACAGGTAAGCACCACCTTG	GCAGTTGCTTAATGTACCTCCTGGTGAAAAGAAGGGCGAATATGTGATCAAGGCATCAGAAGGCTCTGCTTTCTTCCCCGGGAGATGCGCAGAGATCTTGGCCAGGGGTCAGAGCATCGGGAAGCTTGGGGTCCTTCATCCTGACGTCATCACCAAATTTGAGCTGACCATGCCCTGCTCCTCCCTGGAAATCAATATTGAGCCTTTTCTGTGAAGATGGGTCTCTGCTGTGTGACCCTCCCCGAGTATCCCCTCCTCCTGCCCTGCTGTCCTGTAGTCCTCCCCGCAGGGACCATCCATTTGTGCTTTAATGTTTAATAAAGGAGAAAGCCATAAAAAAAAAAATAATAAAAAAACCCCAAAAACAACCCTAAAGCCCTATTGCCAAAATATTAAAAT…
FASTKD5	24:18124249-18136415	FASTKD5L1	9:47443817-47443944	NA	NA
FBLIM1	2:81820129-81837617	FBLIM1L1	6:59601928-59601928	GTTTCGACGCGGCGGGGCCAGCGTGATAAAGACAGACGAGGCGACCCTCTTCTCAGGCTTGGAGGCCATCGTCTCGGTTCCTGGTGGGGCTGCGCCGCCCGCGCCCCCAGCGGCTCCGCTCCGACGCCCGAGCCCGCGAGCCCCCTAAGTAGGCATTCAAATTGGCAATTAAAGGCATTCAAATTGGCAAAGAAGAAGTCAAACTATCCCTCTTCACCGATGACATGATACTCTACATAGAAAACCCAAAAGACTCCACCCCAAGATTGCTAGAACTCATACAAATATTTGGCAGTGTGGCAGGATACAAAATCAATGCCCAGAAGTCAGTGGCATTTCTATACACTAACAATGAGACTGAAGAAAGAGAAATTAAGGAATCAATCCCATTTACAATTG…	CAGCAAATATCATTCTCAATGGGGAAGCACTGGGAGCCTTTCCCCTAAGATCAGGAACAAGACAGGGATGTCCACTCTCATCACTGCTATTCAACATAGTACTAGAATCCTAGCCTCAGCAATCAGACAACAAAAAGATTAAGTAGGCATTCATTTTTTTTTTTTTTTTTTTTTTTTTTTTTTTTTTCTAGTGGTCAGGGTATGGTCCTCAAGAGTACTCACTAAAACGCAC
FBXL5	3:64683770-64727161	FBXL5L1	32:14131894-14131905	NA	NA
FBXO22	30:40100768-40127708	FBXO22L1	1:100923150-100923167	ATCTAAATAAAGCCGCCTGTAAAGTGGCTTTCACAAAAAAAAAAAAAAAAAAAAAAAAAAAAAAAAAGATTCCACATAAGTGAGATTATGTGGTATTTCTCATTTTCTGTCCAACTTATCTCAGCATGATGCCCGCAAGGTCCACCTGTGTTGTTGCAAATGGCAGGATTTCTTTCTTCCTCCTATGGCTGGTAATATCTCATCCATCAT	CTTCTTCCTTCTTCTTCTTCTTCCTTCTTGTTCCTTCTTTCTTCTTCTTCTTCTTCTTCTTCTTCTTCTTCTTCTTCTTCTTCTTCTTCGCTTTTTTTTATTTAGATCTTTTTTTTTTTTTTGATTGATTTTATTTTTTTGTTTTTGGCTG
FDPS	7:42241086-42250373	FDPSL1	33:19795546-19795561	NA	NA
FDX1	5:22452011-22485581	FDX1L1	X:31171149-31171161	TTTTACCTTCCTGGGAGATCTGAGATCCCAGATTCAAATGCTAAGTGGCCAAGCAGGTAACAAGGATTTATGGGCGGCCGCCGCACGAACAGGCCCCGCGGGACCCCGCCGCCGCC	AAAAAAAAAAAAAAAAAAAAAAAAAAAAAAGGATTTATGAATTAGGTCTGGTCTAAGGCAAGAAGGATGATGGAGCCTGAGACAAGCTGGAGAGTAGGCACCCGGTCTAAACATTCAAAATCAAAACAATAAACAGAAAAGCTTAAATCCTCCTGACCACGGTGAGGGTATATTTAACTCATCAGCTGTCAG
FEZ1	5:9001927-9044330	FEZ1L1	15:2414240-2414254	CCGCCTCTTCTTCATCAGCTCCCGCTGCTCCTTCTGCTTGTCCAACATTCTTAATGACCAATCTCTAGGAAGCCCCAGTTCCATTTAGAAAAGGAGTATAAAGCAGGGGGTCCCCAATCTGGAACTTAGGTGCTTATGGAGGCCTTTTCACAGAAGTGCTGGATCATAGCCTCCTGGGGTGGGACCCAAGATAAAGTATAT	ACACACTAAGACTAATTTTGAAATAAACCTTCATTTTATTAATAAAAAAAAAAAAAAAAGAATGTTGGCCATGGCAATTAAGATGGGGCCTGGGACATCCTGTTAAGGTACCGATGCCTGCAGAGTCTGCTGGGCTGGTAATTAAAGGAAGTAAAGCACGGGAGGAGGAGAAGGGGGCTTCCAGCCGTGAGCATGGCAAGCAACAACAGGCTGAGTCGTTAGCACAATCTCCTGTCACCC
FGF4	18:48413480-48417494	FGF4L1	18:20443708-20443726	ACTAGAAATAGAACTTTCATTTGCTCCAGCAGTTTTATTTCTGGGTATTTATCCCAAGAAGGTGAAAATACCAATTTGAAAAATATTTATGTTCAATATAGCACTATTCATAATAGCAAAGATATGCAAACAACCCAAGTATCCATCAATAGATGAATGGATAAAGAACACGTGCTATCTATACAATGGAATACTACTCAGCTATAAAAAAAGAATGAAATCTTGCTAGGTGTGACACACAGATGGACCATGAAATAAGTCAGACAGAGAGCGCGCAGGGAGGCGCGCACCGCTCCGCAGGGTCCCAGCCCGGCCGCGCGTCCCGCCCGCCGCCCGCCGCCCGCCGCTCCATGCAGCCCGGGTAGCCCCGGCGCCCGGGGGCCCCGCGCCTCGCCTCCC…	AAGCCCGTCTTATCCAACTCACAATACCAACCTAAAATCACCACAAAAAACCAACAAAAAAAAAATTTACAAAAACCAAAAAAAAAAAAAAAAAACAAAACAGTCAGACACAGACAGACAAGTACTGTCTGATTTCACTCATGTGCGGAAT
FGF4	18:48413480-48417494	FGF4L2	12:33710166-33710178	CAGCAGGACCGCCGGGAGCAGCGCCGCCGCGGCCGCCCCGGGCCCCGCCATCCCCGCCCTCGGGCCGTGCGCCCGGGAAGCCGCGGGGCCGAGCTGCGCCTGTGGCGGCCCGCGGGAGCGCACGGCCGGGACTCGGTGCGGAGCGCGCGGCCGCAGGCGGAGCGGGAGGCGAGGCGCGGGGCCCCCGGGCGCCGGGGCTACCCGGGCTGCATGGAGCGGCGGGCGGCGGGCGGCGGGCGGGACGCGCGGCCGGGCTGGGACCCTGCGGAGCGGTGCGCGCCTCCCTGCGCCTCAAAGCACTTGAATAGGAATTATCTTAACATATTCCATTTTCTAGAAAGATAAAAAGACAAATATGACTCTCCCCAATGCATAAACAAGGAAACTAAAGCACAAAAT…	AAAAAAAAAAAAAAAAAAAAAAAAAAAAAATAAAAAAAAAAAAAAGTGCTTTGAACTCTTCAAAGAAAAGACACCTCAAAATCTACAGCATAATTGAGGTATCAGATTTTTGCCACTTTTTACTATTATGATTTTATTCACTAGCATTTATTTTGTCATCTAGAATTTTATTCACAAGCAAAAGCTTTTAGGAAATCATACTTATTTTAGGTTAAATGAGAAAAAACATTAGCTTAATTTTTTCTTAGTTTTTTTAATGTTTCTGACTATGATTATAATACCTCACAATAGCTTATAAAGTGAATTTTCAATTTCAGTCATTATTAATTTG
FGF4	18:48413480-48417494	FGF4L3	22:47761861-47761878	NA	NA
FGF4	18:48413480-48417494	FGF4L4	36:11456182-11456199	NA	NA
FKBP3	8:22550241-22560501	FKBP3L1	7:55149809-55149925	NA	NA
FKBP3	8:22550241-22560501	FKBP3L2	23:16784083-16784099	NA	NA
FKBP3	8:22550241-22560501	FKBP3L3	X:104045254-104045271	CACTTTACTTATACTTTCAGTACCTTTGAAACGCTTACTTTCAAAAAGATGGTTGTAGGCTGTAACCAAATGGTCCTTGTTAGCTGTCTTGGCCACATTTTTAATGTTTCCTAATAACTTATGTTCTGCAAGAAACGAATCTGAACCGTGGTCCTGTAGAAACTTGATAATGTCCTTCTTGGGTAGTTGCTCGCTGCGCAGCTGCTCCACGGTCCAGGCCCGCTGTGGAACGGCCGCCGCCATCTTCCCCCGCTGCCTCCGCCATACTCAATTTTCCCATTTCTTTGTGTCCTCTTCAATTTCTTTCATTAGTGTTCTATAGTTTTCAGAGTACAGATCTTTACCTCTTTGGTTAGGTTTATTCCTAGGTATCTTATTGTTTTTGCTCTCATGGACTTT…	TAAAACATGGCCTTGAAGAAACTTATGTAACTAGAGCTGGTTACTATTGTAAGGGGAGAGTCAACTGGAAAATTCAAGAACTCAGATATTGTTTACCCAATCCCCAACTTTTAATATATGTAATCCATCATAATTCCTTAAAGTTTGAGATATTTTACTACAGCTGTGTAAAATAGTAGTTAAAGTGAAGTGACTTTCCTTTTACCTCATGTTGTAAACTAAAAGGCTCAATAAAAAAGTATTCAGTGTCTTGAAAAAAAAAAAAGAAATGGGAAAATTTTCCATGCTCATGGACTGGAAGAACAAACACTATTAAAATGCCTGTATTATCCAAAGCAATCTACACATTTAATACAATCACTATCACAGAGCTAGAACAAACAATTCTAAAATTTGTAT…
FKBP4	27:41950087-41959136	FKBP4L1	21:35064414-35064432	NA	NA
FKBP5	12:4724668-4833691	FKBP5L1	17:3641748-3641748	GCAGAAACCTAAAAATAAATGCTTAATGATTTAAAAAAAAAAAAAAAAATTCCAAATTGAGTAGAGTCTGGCTAGTGAACGTTTGGCCCATGGTGGCCTTTGCTCTCTGGCTGGCTAGAGGTGAAGAGAAGATG	ACCATGTAATAAAATAATAGTTCGGTTGAAAACTTTATTAATTCCAAATGGTGCCAGGTCACCCAGGCATCCCCCGGGAGCTCCTGCATCACAGG
FKBP7	36:22090094-22101230	FKBP7L1	23:2029031-2029048	NA	NA
FKTN	11:61394002-61462056	FKTNL1	1:59782022-59782044	NA	NA
FTO	2:61699864-62080197	FTOL1	3:42178903-42178920	CGCTTCATGCTGCCGCTACAGCCGCCTTCGCCACTGCCTGCATATGCTTTTTTAAACATTCAGGTTACTCTCAGAATATAATATAATAAACATCTTTCTGTAATAAACACCTTTCCACGTCGATACAGTGCTTTGTACATTTTTTTTTTAAGATTTTATTTTTAAGTAATCTCTACA	GAGAAAATGATAAAAAAAAAAAAAAACCCCACAATTACCTGCTGGGAACATTTTGACATGTTTCCATTTGATTTTTATTTCTCCATATGCTTTTTTTTTTTTTTTTTTTTTTTAATTTTTTTTAAACTTTTTAATATTCTGGGGGCGCCCCTTTCT
FUNDC2	X:123046451-123064580	FUNDC2L1	6:65848123-65848142	NA	NA
FUNDC2	X:123046451-123064580	FUNDC2L2	19:40713849-40713867	AGACACAGTCTTATATACATATATATATAGATAGAGACAAAAACAGACAAAACTGAAAAATGCAAACCCCAACTTAGCCAAGTATAGACCCAAAAAATGCAATAAAATTAAATTATAAAAAATAAAACAATTCACCAAAAGATTTTGAATTAAATGATAATTAATTTAAAATTTTGAGTGTAGGAGGCGCCCAGCCCGCCCTCTTCCGCTGCGGCCGTGGGAAT	ACACACACACACACACACACATTTTAAAGAGGTAAAATGTTTTCAGTAGGTTTCCAAGACTGTGCTGGCTCTACACTCAAAATTTTATTTTATTTTATTTTATTTTTTTTTTTTTTTTTT
FUS	6:17059904-17071227	FUSL1	17:6901512-6901525	CGCGCACGCGCGCACAGGCCGGCAAGCAACAAGGTTCCAACACCCTATTTATTTATTTATTCATGAGAGACACGAGAGAGAGAGGCATAGACACAGGCAGAGGGAGAAGCAGGTCCCACACAGGAAGCCCTATGTGGGACTTGATCCCTGGACTCCAGGATCACGCCCTGGGCCAAAGGCAGGCACTAAACCGCTGAGCCACCCAGAGATCCCTAGAA	AAAAAAAAAAAAAAAAATAAATAAATAAATAAATCTTAAAAAAAAGAAAAAGAAAGAAAACTTCTAAAGTTTAATCTCACCCAAACACCTATTGACAGTGCTCGCACCTCACACCATAGCTACATGTTCAGGACAACCGAAAGGATTAGAAGAGACCACATGAGG
FUS	6:17059904-17071227	FUSL2	25:34779287-34779297	AGTTGGAGGCCATGTCCGCGCACGCGCGCACAGGCCTGCAAGCAACAAGGTTCCAACACCGCAGAGCACCGACGCCTCGAGGACTCTCCTTTTTTTTTTAATAAAGATTTTATTTATTCATAAGAGACAGAGAGAGAGGCAGAGACATAGGTAGAGGGAGAAGCAGGATCCCTGCAGGGAGCCTGATGTGGAACTCGATCCCAGGACCCCCGGATCATGACCTGAGCCAAAGACAGACACTCGACCACTGAGCCAT	AAAAAAAAAAAAAAAAAAAAAAAAAAAAGGAATGGATAAAGAAAAAATAAAATAACTCTATTTGAAGAATATATATAATAATAGTATATCCAAAAAAAAAATAGTATATCCAAAAACCCCCAAAAAAATCAATGATA
FXR1	34:14129978-14192016	FXR1L1	19:26515548-26515559	CAAAAGAGGTGATTGAAGAGCATGGTCCTTCAGAAAATGCAATAAATGGCCCAACTAGTGCTTCTGGCGATGAAATTTCTAAGCTACAGCGTACTCCAGGAGAAGAAAAGATATTTCATTTATCATATATAGTTGGTCTTAAAGTTTCATCCTCCAAGAGCCCTTTTAAAACACTACTCTTACACAGAAACTACATTTTAATATTTACCTACAATGCCATTTAAACAATTCATGCATTTTAAAGAAACAGGAACAGCTCCAGCAAGCACATGGACTCTTTCCATTAGTCTAG	NA
FXR1	34:14129978-14192016	FXR1L2	23:9277237-9277249	NA	NA
G3BP1	4:57541627-57585375	G3BP1L1	18:30609500-30609518	GCGGAAGGCGAAATCCCCTCACGCAACGGCGTCCGCCAATAACTGACTATTTCAATGAGGACAAAATTATTATATGTAATATAAATATAACATATTTGTATTATA	TTTACTCTCAAACCCAGCATACAAGAAAAAGGGACTTCTTGATCAAAAATATTAAAGACAATGGGTAATTAAATACTGTTGCTGATAAACATAATGGGAAGGGAGAAGAAATTCAAATCTGCAATAACTGACTATTTCTTTTTTTTTTTTTTTTTTTTTTTTTTTTTCTACTAATCCCTTTTATTCAGTTTTTAACCATACCAGCAAGAATCAGAACTGTCAATTTTTCCAATGGCAATTTCTACACACCAGAAGGTAGTCATGACTCTCAAAGAACAAACAATCTGGATTTTTCCTGCCTTCAAATGTTTATCAAATCCTGTGTTTCTCACAGGCTTTTGCAACACAT
G3BP1	4:57541627-57585375	G3BP1L2	33:22607889-22607901	TGTAGGTTGAAGGGGTAAATTATGGGCTAGGAGACAGATTCTGTTACATTGCCCTTCCTGTTGGAGAATGGCTATTATCAGAACGACAGGAAACAACAAGTGTTGGCGAGGACGTGGAGAAAAAAATCCTTGTGCACTCAGTGGGAATGTAAGCTGGTATAGCTACCGTGGAAAATAGTATGGAGACTCCTCAAAAAATTAAAAACAGAACTTCCG	AAAAAAAAAAAAAAAAAAAAAAAAATAGCCATTCTGACAGTTGTGAGGTGATATCTCATTTGGTTTTGATATTTATTTCCCTGATCATTAGTGATGTTAATCACCTTTTCGTGTACCTGTGGGCCATCTGTTCTCTTTGGAAAAATGTTCAGTTCCTCTGCTTAGTTTTTAATCAGTTTATTTGGTTCTTTTT
G6PD	X:122217317-122231862	G6PDL1	33:26953990-26954054	GTAGAATATAATGGCTGAACCAACCTTAACAGGATTATAGGAAGTGGTAATCTGACTGAATTCTGCTTGATAAATCACATCTGGACGCGCCTCGCCTGAGGCGGGTCAGCTCAGCCC	CCACCAGCCACATTCTAGCTCTGCCATGTTATTCTAATATCCAGTAGCCTCACATCTGGAGTTCATCTGCTCACTACTGGATTTAAGTTTTAAGACACTGACAAAGTGCAGGACATCAAGAGAGAGCAAGCAGGATGG
GABARAP	5:32207879-32209976	GABARAPL1	8:20790995-20791012	GGATGAGTTCAAATTTAAGTGACTGCCAACTTAATATAAACTGCTATATACATGTTTTACTATAAAGAGACTGGTAACCACAAATAAAAAACTACTAATAAACATGTAAAAAAAAATAAAGAGAAAAAAATTCAAGTATATCGAAGAAAGCCAGAAAACCATCACAGGAAAGTGCAAAAGGGCCCGCGCGTCGCCGCCGTCGCCGCCGCCCCC	AAAAAAAAAAAAAAAAAAAAAAAAAAAAGGAAAGTGCAAAAGGATGGAGAAAAAGAACTAAGAAAACAATCATAAAACAAGTAACAAAATGGCAGGAAGTACATACCTATCAAAAATTACTTTGAATGTAAATGTCTAAATATTCCAATCACATAGGGTGACAGAATG
GALNT1	7:54390144-54512908	GALNT1L1	20:29506619-29506637	GGACGAGAACCCCCCGGTCAAGCCACTCCTGAATTCCTGACTCATGGAGACTGTAAAATAATATATGCTTATCTTCTTAAGCCACTAAATTTTATACAGCAGTAGAAAACTAATATATGCTTCAAATTAATATAAGTAAATTTGGCTGTTT	ACTGAGACCATGTGCACCCTGACAACTTGGTAGTGAATGCCTCATAAGATAACCTGAGCCAGAACCACCCAGTTAAGCCACTCCTGAATTCCTGACTCATGGAGACTGTAAAATAATATATGCTTATCTTCTTTTTTTTTTTTTTTTTTTTTTTTTTTTTTTTTTTTTTTTTTTTTTTTTTTTTTTTTGTTTTTATTTTTTTGTG
GALNT1	7:54390144-54512908	GALNT1L2	23:37106460-37106475	NA	NA
GALT	11:51319812-51323337	GALTL1	8:69891064-69891079	TCAGGGGGTGATCCGCTGCGCGACATTAGGCCACTTGCGTGGGTGGGGATCTTCTGCAGATTTTTACCTTGTTTACATTTGGGATTACCACGTAATATTAGGCAATTCCTGTAACTTAAATGCTCATTTTAAGAATACTTCTTTTATAT	AAGATTCTTTGTGAAATTTTACTAGTTTGTGAAATCCTAACTCCAGAGCATCATTTTAAGCCACAAATATCAGATTTTTACCTTGTTTTTTTTTTTTTTTTTTTTTTTTTTTTTTTT
GALT	11:51319812-51323337	GALTL2	14:27339007-27339022	NA	NA
GALT	11:51319812-51323337	GALTL3	20:41125924-41125940	CTTGCGTGGGTGGGGATCTTCTGGAGCTCTATAGAGCAGACTCTCACCCATCTCTGGGTCTCAGTGTACTTCATTTTCAGCTCAAAATCAAAATGTGCTGTCCACACTAATCTCAAACCCAGTGTTTCCCTTTTCAGACACTTAACCAAAGAAACTAGGATGACAGAGATTAATTTTGTGCAATATAATAACAGAGTGGCTAAAAACAAACAAGAAGGCAGAAAGGGGCTGCTGAGCCCTGGGACTTCCAG	AAAAAAAAAAAAAAAAAAAAAAAGAAAATGAAGTACACTTAATTGCTTTGTGTTTACTTATTAATCAGTGGGCTTTGTTGTCCACCCACTTGTGAAAGTTGGATGAAAATAGGTTCTCTCCTGGTGGGAGTGTCTGAGTGAACAGCATTGGTTTTGTAAAGAGGTGGAGAGCTCAGTAAAATCATAATCCTCCTTTTTCTCTGTGCTGTTTCACTCCCACATGATGAGGAGATGGTACCAGGTGA
GAP43	33:19668491-19770509	GAP43L1	1:93720802-93720815	TTCTTCCTGCCTTCTCTCCTTCCTCCTCTCTCTTTCTTATTCCCCCCCTCTCCACCTCTTTTCTGCTCCGGATTGTTTTCTTAACTTCCTTTTCTGCTACTTCATTATTAGTGTATAGAAATGCAAGAGATTTCTGTACATTGATTTTGTATCCTGCAATTAATTACTGAATTCATTCATCAGTTCTAGCAGTTTTCTAGAAGCCTATTTTAAA	AATGTGTCTTTCCATTTGTTTTTGTCACCTTCAATTTCTTTCATCAGTGTTTTATGGTTCTCAGAGTGCAGGTCTCTCACCTTGGTTAAGTCTATTCCCAGATATATTGTTCTTTTTGGTGCACTTAGAATTGGATTGTTTTCTTTTTTTTTTTTTTTTTTTTTTTTTTTTTTTTTTTTGTTTCTTTTTTTTTTTTTTTTTTATT
GAP43	33:19668491-19770509	GAP43L10	21:15530298-15530308	NA	NA
GAP43	33:19668491-19770509	GAP43L11	21:16164722-16164738	ACATTTTGTGTGTTTCCTTTATGAAAGGAGCAAATGGTTTTGCTTTCAGTGTATAATCTCAAAAATGGATTATTGGATTAAAACAGATTAATAATCTGTTTTACTAATCAGTTAATAATCTAAAAGTGTTAACAATCTGGACATCAGAAAGAGAGAGGAGGAAGGAGAGAAGGCAGGAAGAAGGCAAGGGACGATACAACCATGCTGTGCTGTATGAGAAGAACCAAACAGGTTGAAAAAAATGATGAGGACCAAAAGATTGAACAAGATGGCATCAAACCAGAAGATAA	AAAAAAAAAAAAAAAAAAAAAAAAAAAAGCAAATGTGCCAATTAGCGTAAAAAAAAAAAAACAATCTGGACATCACACTAAGCCTAAGTATTTAATTTTTTAAAAATTCAAATACAAACTAAACCAACCAAACTCCCTCTCTATGCTCTCTTACA
GAP43	33:19668491-19770509	GAP43L12	21:22142915-22142934	NA	NA
GAP43	33:19668491-19770509	GAP43L13	21:29267935-29267944	CCTCAGAGGGAGTGGCACCTTCTCCCTCCTTCTTCTCCAGGCCATCAGCAACAGGAGCTTCATCCTTCTCCTTCGCTTCTGCCTCAGCAGCTTGGGCATCACCCTTCTTCTCTCCTTTGAGCTTTTTCCTTGTTATGTGTCCACGGAAGCTAGCCTGAATTTTGGTCGCGGCCTTATGAGCTTTATCTTCTGGTTTGATGCCATCTTGTTCAATCTTTTGGTCCTCATCATTTTTTTCAACCCTCATCATTTCCGAGTGCCGCTGGTCTTCTGCAGCTCTTCTCCTCTCCAGGTCCCTTCACAGTCTCTGAACTCTTATTTTATACATGAAGTAGAATAATATTAATAGGTTTGCTGTGATAATAGATGCATTTTTTAAATGCTACAACTGACAACAGC…	AAAAAAAAAAAAAAAAAAAAAAAAAAAAAAGAGTTCAAAAACGTTTACTTCTGTTTCACTCCTTCTTATCATTCTTCTATTTTTACCATATATTTTATTTCTCCATGTTTCATAAATCCTAGTATATTGCCAGTATGTTTTGCTCCCTTACTTTTCCTCTGTCAATGGCTTCAGTTACCAAGTACACA
GAP43	33:19668491-19770509	GAP43L14	23:6695657-6695672	AATTAATTGCTGAAAAAAAAGAGCAAGGTGTGTCACCCCATGCTGTACTCCTCACAGCAAAAACAAGAGTGAATATCTTGTAAAACCAGCCACAACAAGGAAGACAGAATTATGCCTAAAGGGCTATTGGCAAAAGTCTCTTATCGAACGACGAGACAGGGGGTCACATAGAATGAATGGGATACAAGGCGAAAGGGCCATATGCATTATGTGTGTGTGTGTGATAGAAGTTACTTCAGGAGACTGTGAAGGGACCTGGAGAGGAGAAGAGCTGCAGAAGACCAGCGGCACTCGGAAATGATGAGGGTTGAAAAAAATGATGAGGACCAAAAGATTGAACAAGATGGCATCAAACCAGAAGATAAAGCTCATAAGGCCGCGACCAAAATTCAGGCTAGC…	AAAAAAAAAAAAAAAAAAAAAAAAAAAAAAGAAGTTACTTCAGCCTAGATTTGGACAAAAACACTGCAAAATGTAATCCAGCTCTTGACACAAACATGAGGGAAAAATTCTCAAAGACTCTCACGCTCCGGGAGAAGAGATTATTTTGGCAGCTGTGCTATAGACTGGAAAACAAGTGTTGGGATCAGGACTGATGGGGCTTCAACCACATGGGAAACAAAAAAGGAACATTCAGAGCCAATCCACACAAAGAGGAGAGTCAGTGGTCAACAGCATGCCTGTTGGCC
GAP43	33:19668491-19770509	GAP43L15	23:8105158-8105173	NA	NA
GAP43	33:19668491-19770509	GAP43L16	26:6604456-6604456	NA	NA
GAP43	33:19668491-19770509	GAP43L17	27:1096287-1096305	TGTATCGTCCCTTGCCTTCTTCCTGCCTTCTCTCCTTCCTCTCCGTCGCTCCTCTTACAAGGACACCAGTCATTTTGGATTAGGGTTCCACCCCTATGACCTCAT	TGGCCTTTAAAGAGGTAACTGAGGTTAAATGAGGTCATAGGGGTGGAACCCTAATCCAAAATGACTGGTGTCCTTGTAAGAGGAGCGACGGAGAAAGGCCATGGGAGGACACGGTGGGAGGGCAGCTGTCCCCAAGCCAAGGAGAGAGGCCTCAGGAGAAACTGCACCTACTGACATCTGCATCGGGGACTCCCAACCTCAAGAACCCGAGATGATAAATGTGTTGCTTGGGGCAGCCCAGGTGGCCCAGCGGTTTGGCGCCGCCTTCTGCCCAGGACGTGATCCCGGAGTCCTTGGATCGAGTCCACGTCGTCGGGCTCCCTGCGTGGAGCCTGCCTCTCCCTCTGCCTGTG
GAP43	33:19668491-19770509	GAP43L18	31:11840058-11840080	CCTTGCCTTCTTCCTGCCTTCTCTCCTTCCTCAGTTTGAGTACCTTTAAAGTTAAAATTTATTCTTCTAAAATTGTGCCCATTTTAAACTTAAAGCACAAATCAAGAAAATAAAGATGATTATGATCTTACATAATGATGACTAAAAATAATTTCACCATAGGAAACAGGGACTCTGCTAGTATTAAATACACTGTGTACTGATCAAAGCAACATTCAGCATGTGTGACC	AAAAAAAAAAAAAAAAAAAAAAAAAAAAAATAAAGGTACTCAAACTGAGAAACAAAAGTAAAAGTAAAATTAAAATAATAAATGAATAAATAAAATTAAAAGCTAAAAAAAAAAACCTTCAGGTAACTATTTCATATATGGATTAAAATTTGTATTTATCAAGCAAGTAACACTTCAAAGCTCACACACTATTTTGATGTTTTCAATTTTATTTATTTATTTAA
GAP43	33:19668491-19770509	GAP43L2	1:105973582-105973598	ACGAGAGCTCCCACTTCTGACTCCAGATTACATTTTAAGTTTCCTTTTATTAATTTTTGCAGTTGCAAGATGCAAAGATAATATATATAAGTCAACTGTCTTTTTATATACCAGCAATGAACAGTTGGGATTTGGAATTAAAAACACAAAGCCAAAGAGAGAGGAGGAAGGAGAGAAGGCAGGAAGAAGGCAAGG	AAAAAAAAAAAAAAAATAAAAACACAAAGCCATTTACATTAGCACTCACAAAAATGAGATCTTAGGAACAAATATAACAAAATGTGTGTAAGACCTATATAAGGAAACTACCAAAGTCTGATGAAGGAAATCAAAGAAGGTCAACATAAATGGAGAGAGATTTCATGTTCGTGGAT
GAP43	33:19668491-19770509	GAP43L3	7:56532678-56532693	AAGCTAGCCTGAATTTTGGTCGCGGCCTTATGAGCTTTATCTTCTGGTTTGATGCCATCTTGTTCAATCTTTTGGTCCTCATCATTTTTTTCAACCCTCATCATTTCCGAGTGCCGCTGGTCTTCTGCAGCTCTTCTCCTCTCCAGGTCCCTTCACAGTCTCTGTGACAGTGTTTTTAAACAGATTATTACTGTTATGGTTAAAAGCTTCTAATTTCCTTATATCCAGCCATTTTACCAAAATCATTTATTGAAGTTTTAAATAAAATCTTCTGTTTTTCAAAGTGTTCAGTAATATCTAAAGTTGAAGGTGTATTAC	AAAAAAAAAAAAAAAAAAAAAAAAAAAAAACACTGTCACAATACTTAAAAACTTCGGTAAAAAAATACAAAATATTTGGGAATTAATTAAATGTAAAAGAGAACTATAGAAAATAAAAACAAATTCTTACTTAGAAGCTCGAATCAAAAACCACATGAAAAGAATGATAAGCCATATAA
GAP43	33:19668491-19770509	GAP43L4	8:31386939-31386956	NA	NA
GAP43	33:19668491-19770509	GAP43L5	10:31704499-31704517	ACACAATATGGTATAGAAGAAATCAGAACACAAGATGGAAAAATCTGCCAAAAAGACCTGTAGCTTCAGATGAAGCTTAAAAGCACATCAAATCAATTAAATGCTTGAATACAAAAATGATAAAATAACAGAATGAGATAAAAAGATTGCAGAGCTGAGAAAAATAAAAACCAAAAGGCCCATTATAAAATAATTAAATTAGGACCAGACTGTGAAGGGACCTGGAGAGGAGAAGAGCTGCAGAAGACCAGCGGCACTCGGAAATGATGAGGGTTGAAAAAAATGATGAGGACCAAAAGATTGAACAAGATGGCATCAAACCAGAAGATAAAGCTCATAAGGCCGCGACCAAAATTCAGGCTAGCTTCCGTGGACACATAACAAGGAAAAAGCTCAAAG…	ATTGTCTATGATTCCTACAAGCATTTGGATATGCTGAGGTTGATTGGATTACATTTGGTTATACTGAGGTGGGTAGATTCTGCCCTTTTTTGAAAGTTTCTAATTTAATTATTTTTTTTTTTTTTTTTTTTTTTTTTTTTTTTTT
GAP43	33:19668491-19770509	GAP43L6	14:14158340-14158355	CCTCCCCCTTCTTCTCCTCGGAGGGAGTTTCGCCTGCCTTGCCAGGTTCCTCAGGCTTGGGGCCTGAGGCAGGGGCTGCCTCAGAGGGAGTGGCACCTTCTCCCTCCTTCTTCTCCAGGCCATCAGCAACAGGAGCTTCATCCTTCTCCTTCGCTTCTGCCTCAGCAGCTTGGGCATCACCCTTCTTCTCTCCTTTGAGCTTTTTCCTTGTTATGTGTCCACGGAAGCTAGCCTGAATTTTGGTCGCGGCCTTATGAGCTTTATCTTCTGGTTTGATGCCATCTTGTTCAATCTTTTGGTCCTCATCATTTTTTTCAACCCTCATCATTTCCGAGTGCCGCTGGTCTTCTGCAGCTCTTCTCCTCTCCAGGTCCCTTCACAGTCTCCCAAAAGAGCTTT…	AAAAAAAAAAAAAAAAAAAAAAAAAAAAAAGCTCTTTTGGTAGCTATTTTCATTATTCCTGTCATACCTATTAAGCTACAAGTTTTATGAGACTGAGAATTGCATCTACTATTCATAGCTTCATCCCTGAGCTAATGGCATGTATTCAGTACACATCTATTGAATGAAGGAGGACTGAGAACACAAGTTGGGTATCTGAGAATTTAGACTTTTTTCTACTCTGTCATAAATCTCTCATGTCAGCTTTCCTAGACATTTAAACCTCAGTTGTCTACATTTTTAAAAGTTTTTTTTTATAGGAATAAT
GAP43	33:19668491-19770509	GAP43L7	17:34216568-34216583	NA	NA
GAP43	33:19668491-19770509	GAP43L8	20:1252085-1252099	GCGGCCTTATGAGCTTTATCTTCTGGTTTGATGCCATCTTGTTCAATCTTTTGGTCCTCATCATTTTTTTCAACCCTCATCATTTCCGAGTGCCGCTGGTCTTCTGCAGCTCTTCTCCTCTCCAGGTCCCTTCACAGTCTCCCAAAATATTTTAGATCTTAAAAAAAACTGTCATGAAAGGATCTCTATTATGAAATAATAAATAAGAGTGTGACACATAGAAAGAATATGAGGAACAATAAAAGAACACAGAAGAACATAATAGAAAGTCCCCAGAAATGGACCTTGTTAAAGATAGAAATTTACTATATGCTAAATATGACACTTGAATTCAGCAGGGAAAGAACAAATTATTGATCAAATGGCAGTAGAACAACTGGCTAATAATATGAAGGAAAA…	AAAATCATTTTTTATTTAGAAAAAAAAAAAAAAAAAAACAAAAAACTAAAAATAAAAAAAAAAAAAAAAAAAAAAAAAAATAAAATAAAATATTTTGGCTATCCTAATTTACTTATTCCAAAAAATATACTTGCAGATTACTTTGTTAAAAGTTTGATTTTGATAGAAATGGAATTTATTCTAGAAATTAATTTGTGGGGATACTGACAATTATAAAATACCCCT
GAP43	33:19668491-19770509	GAP43L9	20:55305025-55305037	GACGTGTCCCTGTCTGCCCCACACCATGTCTTCCTGCACTGAGCCAGGCCATTGGCCCCGGGGCCCCGGAAGGTGTGGTTTTGAGCACCTACGCTTCAGCTCCCTCCTAGTTCACCAGAAGAGTCTCGTCTCACGTCAGGCAGTGCACTCATTTCCCTCTCTGGCAACCACTGAATTTGAGAACGTCCTGTTTTACCATCATCAAAAGAAGTGAAACTGTCCCATGAAATAAATTGGGACGGGTACCAGACTGTGAAGGGACCTGGAGAGGAGAAGAGCTGCAGAAGACCAGCGGCACTCGGAAATGATGAGGGTTGAAAAAAATGATGACCAAAAGATTGAACAAGATGGCATCAAACCAGAAGATAAAGCTCATAAGGCCGCGACCAAAATTCAGGC…	GGGCAGGATGTGGCTCCTGCCTGGGAGACGTGTCCCTGTCTGCCCCACACCATGTCTTCCTGCACTGAGCCAGGCCATTGGCCCCGGGGCCCCGGAAGGTGTGGTTTTGAGCACCTACGCTTCAGCTCCCTCCACGTCCTATGCAGGACA
GAPDH	27:38468889-38472653	GAPDHL1	38:22097487-22097504	NA	NA
GAPDH	27:38468889-38472653	GAPDHL10	16:30597847-30597863	GGGCTGCAGCAGAAGACGCGGCTGTCTGTCGGGCGGGGAGGAGCAGAGAGCCGACATTTTCACTTTAAAGTTACTTTTTTACAATTTATGATGAAAGCACTGCACCTAACCTAAGTGGTCCATAGCACCCAAAGTAAAGTA	TCTTTTCAAATTTTTCTATGCCCTTTTTTTAATATTATTGAGATCATTGCACCATACTCTTTTTTTTACCCTACTTTCCCCGACATTTTCACTTTATATTTTTTTTTTTTTTTTCGCTGGGTACAGTATA
GAPDH	27:38468889-38472653	GAPDHL11	16:5033274-5033290	ACCATTGATTTACATATTATTTAGTTTTCTTGGTTTTTTTAGGTGGGCAGGTAACACTAGTCTTTATTATTCCATCTTAACTGGAAGTGGAAGTCTATTATCTTATTAAAAACTGAAGTAAAGTCTCTGCTCCTCCCCGCCCGACAGACAGCCGCGTCTTCTGCTGCAGCCCCAGGCACGATGGTGAAGGTCGGAGTGAAC	TTGGGTTTTTTAGGGGGGGAGGGAAACCTAGTTTTTTTTTTTTCTTTTTTATTGGGAGGGGAAGTCTTTTTTTTTTTTTAAAACTGAAGTAAAAAATAAATAAATAAATAAAAAATGAAGTCAATTAGAGTCTCGGAATCAAGGATACATAACAAAATAATTTTGTTCATAAATTGTACGTACTCCTCACTGCATCAATTAGTGTACAGGCTAAGATAT
GAPDH	27:38468889-38472653	GAPDHL12	14:6526152-6526167	TGCAGCAGAAGACGCGGCTGTCTGTCGGGCGGGGAGGAGCAGAGAGCCTGTCATTAGTTTTCTCTTGTTTTTCTGTTTAAAATGTCCTTGAGGGCAGCCCCGATGGCCCAGTGGTTTAGCGCTGCCTTCAGCCTGGGGCGGGACCCTGGAGACCCAGGATTGAGTTCCACGTAGGGCTCCCTGCGTGGAGCCTGTTTCTCCCTCTGCCTGTGTCTCTGCCTCTCTCTCTCT	GCTAATTTGTGTTTCTTCCCTTTTTTTTTGCTATAGATTTGCCCATTTTACTGATACTTTAAAAGAATAAGCTCTTGGTGTCATTAGTTTTCTTTTTTTTTTTTTTTTTTTTTTTTTCCCTGGGTACAGTATATTTTTTTTTTGGGAAATGA
GAPDH	27:38468889-38472653	GAPDHL13	12:68005090-68005106	GTAATGTCAACCTCAGGTTTTTAGAAATTCACATTTTCTCTAGTAAGGGGATGTTTCAAGTGGTTGTAGCAAATTAGAAAAACTATAAGTAGCTCTCTGCTCCTCCCCGCCCGACAGACAGCCGCGTCTTCATGCTGCAGC	TAAAAAAAAAAAAAAAAAAAAAAAAAAAAAAAAAGAAAAACTATAAGTATATATTCATACATAAAATATAATTTTAGGACTGATACTTAGAATTTATTTAATGAGCCCAAACCTTAATATATAGA
GAPDH	27:38468889-38472653	GAPDHL14	12:26079004-26079025	TTCAAAATTTTATATGAAGTGTTTAAGAGTGCAGTGTTCAGTTAGGGAAGCATTATTCAAGTTTCCACCATTACTGTCTAAAAATTAGCTAGGCAAAAATCTTTTATATGCCACTTTGTGACTTTATGAGTTACAGTGCAATCAAATAAAAATATTAAATGACTCACTGTCCAAATATCAATAGAAAAGTTGCATGCTCAAAGATATCCATATCTGATATGTCAATTAAAAAAAAAAACACTTTTGGCTCTCTGCTCCTCCCCGCCCGACAGACAGCCGCGTCTTCTGGTGCAGCCCCCGGCGC	AGCACTCAGTTATTATGAGTTTGAAAGAAATTGTACTTTCCCCGAAAAAAAAAAAAAAAAAAAAAAAACACTTTTGCTGGTAGTTTGTCTACCTCCTCAAATTGGGCTATTCTTGGTTTCAACATTCCCTCTAATATTGGCTAGTCCACTAATTCTCAATTGAGTGTGATTTTTACCCCAAAGGGACATCTGACATGATGTGGAGATATTTTTTTCCCTTCATAACTGAGGGAGATGCTTCCAGAATCTGGAGGTAGAAGCCTATGCAGCTGTTAAACAGTCTACAATATACA
GAPDH	27:38468889-38472653	GAPDHL15	11:65878299-65878315	GGCATGGACGGTGGTCATGAGGCCCTCCACGATGCCGAAGTGGTCATGGAAACACTACATTTTTAAATAATCCAAGCAGTGCGGTGCTAGTGTGGAATGGGGTAATATAATAAAGGATCGGAGTACATAGAAGAATTAAAATAGAATATGGAAAAGGAAACCCTGAGATGGTGCTACTGGGAAAAACCATCCCTCT	AAATTGACCTCTAGATTTATCAAACTTTTAAAAAATTTCCAACAAAAAAAATTCAACATTCCTCCTTGAAACACTACATTTTTTTTTTTTTTTTTTTTTTTTTTTTCTTGGGTTCATATACTTTATTGATGGTACATGACAAGGTAGGGCTCCCCCCCCGCCCTTCCCCCTCCTTGG
GAPDH	27:38468889-38472653	GAPDHL16	8:16800413-16800430	CGTGCCTCGGGGACGCGCCTGGGGCTGCAGCAGAAGACGCGGCTGTCTGTCGGGCGGGGAGGAGCAGAGAGCCGAGAAAAACAAATTTAATTTTGTATTTATGGGAGCTTCACATAGCTATGAGAGGGTCAAAGACAGACATTTGAGACTTATAAACCGTGAGGAGCTAAGGAGGAAGGGTAGGGGTCTGGGTTTTCAAATGGAAGGAATACAATTCACAGGAAATGGGAAGAACAAATGTTTCATAGACAAATATTTGCCATGCCATATGGAAAGTCTTTCTTGTGTAAAAAAAAAGTTATATTTAATAATAGCTCTCTTTCAGGTAGAGTCTCCCTATCTA	GGGGGAGGGGGAGGGACCCTACGCTGTACTACACAAAAAAAAAAACACAATAAAAACACAAAACAAAAAAAAAAAAAAAAAAAAAAAAAAAAAATAAATTTGTTTTTCTCCTGTTAATTTGTCTTATTTCAATTTAATTAATAGACCAGCCAAAGAACCTAGAAAGAAAGAAGGGAAAATTTATCCTCCCCTATTCTTATTTGAATCTACTTGGCTAATAAAGT
GAPDH	27:38468889-38472653	GAPDHL17	6:8180718-8180732	NA	NA
GAPDH	27:38468889-38472653	GAPDHL18	3:82422570-82422587	TATTCTAGATACTTAAAACTCTTAATTTGTATGTTGATTGTTCATTTTCATTCATATATATATTTAAACTTTTCAGTTATATGTATATTTTTTCTAATTTGATTCCAGATTGCTCATCAAGGTAAAATATTAATTAAGATTAAGAAAAATTCAAGCTAGGATGTACTATACATGAAAATAAATGAAGACAAGAGTATCAAAGTCTTAAACTGGGAAAAAATATTCCAGATCGGCTCTCTGCTCCTCCCCGCCCGACAGACAGCCGCGTCTTCTGCTGCAGCCCCAGG	AAAAAAAAAAAAAAAAAAATATTCCAGATCATTAAGATCCTATCCACTCACTAGCAAATGAAACAACAAAGAAAGGGTGTGCACAATTGCCTGATGATCACTACTTGGATGTTGTCTTTGTATCCTAATTTCTAGGTCAATGATATTCATAGTGCATCATTCCATCAAAAAATTTTAGAAGTGCAAAGTTTTTCTCCAAATCCTCTCATC
GAPDH	27:38468889-38472653	GAPDHL19	3:27633751-27633768	GTCCTTCTCCCTCTGCCTGTGTTCTCTCATGAATAAATAATCTTTTTTTTTAAAGAGGCTTAAAACAAAATCACTTTCTTACTGTTTTGGTTTAGAATTATTTTACCTGTATGGCATCACTTCACTTAAAAGCATCCTGGTTTGGGCTCTCTGCTCCTCCCCGCCCGACAGCACACAGCCGCGTCTTCTGCTGCACCGCGCCCC	GGGGATCCATACTTTCTCTTATACCACCAAAAAATATAACTCTCACAAGAAAAAAAAAAAAAAAAAAAAAAAAAAAAGCATCCTGGTTTGCAAGAGAAACAAGTTTGAGTCTGGGAGGAATCCAGCAGTTATCAGTTTGCTTCAGGAAAAAGTGAGTATGATATTAGCTGGTATTTATTGAAGGTTTTGAGTACCCGATACTCTGGTATACAAC
GAPDH	27:38468889-38472653	GAPDHL2	37:26135307-26135318	CGTACCCCGAGTTCTGGGGCACAGTTCACACGCTCCACTTACACAGCTAGTGACTCACCCTGCGGTCCTGACTCATTCGTTCGGCGCCCTGCGAGAGCGGGAGGCCAAGCACATGTCCTTTGGTGTTAAGAGGTGGAGTTCAACAGTGACACCCACTCTTCCACCTTCGACGCCGGGGCTGGCATTGCCCTCAATGACCACTTTGTC	GGGGAGCCCTACCTTGTCATGTACCATCAATAAAGTATACTGTACCCAGAAAAAAAAAAAAAAAAAAAAAAAAAAAAAAAAAAGAGGTGGAGGGGGGGCAGTTAAATGGCTCGGGCTCCCACAGTCACCTTGTATACACCCCTGATGCCGGATGGGCAGCCTGCTTCCCAGCTGTGACCACGGCAGGGTCACGCATGTCTGTTGTGGGGAGGCCGACCTGAGTA
GAPDH	27:38468889-38472653	GAPDHL20	2:81461408-81461425	TGCAGCAGAAGACGCGGCTGTCTGTCGGGCGGGGAGGAGCAGAGAGCCTCCCTTTTGGACTTTAATTCCTTGGTTTGCTGGTTGAATTCTGCCTCTGGCACATCAGGTATTCT	AAAAAAAAAAAAAAAAAAAAAAAAAAAAAATAAAGTCCAAAAGGGAGATTAAACAATGAAACAATTCTGACCTGATTTATGGCAGCAGCTGCTACTTACTGCTCTCGAGAGGCAAAAGCCTCAGAGGTTCTCACGGTGACATCTAAAAGATGACCCAGACAACCATAGACACGCATAATCCTTTGCAGGGACATG
GAPDH	27:38468889-38472653	GAPDHL21	1:92848072-92848088	NA	NA
GAPDH	27:38468889-38472653	GAPDHL3	35:20579883-20579899	ACCAGAAGACGCGGCTGTCTGTCGGGCGGGGAGGAGCAGAGAGCCATGATTGAGTAATCTATATATATTATAAAATATATACTAAAACAAATTTATGCTATATTATTTGCAACGCTTCTCCTAATGTAGAATTATACATTAAAGCT	TATTCATCCTCAGAGACAAAGAAGCAACAGAAAAGTTAAAAGAACCAGAAGTAAGTTATTAAGTATATAAACTAAACTGTATGATTGAGTAATCTTTTTTTTTTTTTTTTTTCTTATCTTTTTTTTTCT
GAPDH	27:38468889-38472653	GAPDHL4	30:18799997-18800010	CAGCAGAAGACGCGGCTGTCTGTCGGGCGGGGAGGAGCAGAGAGCCTCCTTCTGGCTTTCTATATAAATATAGTTAAGACTCTAAATCTCCCATATAGAATTGCTTTAACAGCAAGCAATGCATTTTGGTATTTAATGCTTGTATGTACCTCATGATTTTATAAAGCACATTTATAAATTTAGATTTATACAC	TTCTTTTTGTTTTTTTGAGTTTATTCTATTGCTGCATTTTTCCTCAGATTTTTAATTTAAATGATTCTCATTTATTTTTCATTCCTTCTGGCTTTTTTTTTTTTTTTTTTTTTTTTTTTTTTTCCGGTCTTGGGAAACATACTTTTTTTTTTTTTTG
GAPDH	27:38468889-38472653	GAPDHL5	30:10979780-10979795	NA	NA
GAPDH	27:38468889-38472653	GAPDHL6	28:8462204-8462220	NA	NA
GAPDH	27:38468889-38472653	GAPDHL7	24:25579073-25579093	CAGAAAATGGGACTAATAATAACAGCTACAGTTTTGAGTGTTTACACAAACACTCTCTTCTAACCCTCATAGAACCCTGTGAGGCAAGGGCTGCTATGATACTCATTTTACAGATGAGGAAACTGAAATTTAGGTGACATGCTCAAAATCACCAAATTTAATAAATTATAAAAAAAATTTAAAAAACAGGCTCTCTGCTCCTCCCCGCCCGACAGACAGCCGCGTCTTCTGGTGCA	AAAAAAAAAAAAAAAAAAAAAAAATTTAAAAAACAAAGAAACCTCCACAGATAGTGAGTGTAGTGAGTGCAGGGACAACTCAGAGCCCAGCATGTGGTTGACACTCGGAGTGGCTGCCTTTAGTAGGATTCACATTTATGATATCCCTTTGGAGCCCCCATGGGAAATGGGTCATCAGCTCAC
GAPDH	27:38468889-38472653	GAPDHL8	20:22912312-22912329	NA	NA
GAPDH	27:38468889-38472653	GAPDHL9	19:3470456-3470473	NA	NA
GAR1	32:29995710-30004545	GAR1L1	28:30223298-30223318	NA	NA
GAR1	32:29995710-30004545	GAR1L2	32:29711347-29711362	NA	NA
GATAD1	14:18043857-18054340	GATAD1L1	19:10412101-10412101	NA	NA
GCAT	10:26821121-26827496	GCATL1	14:39640848-39640864	GAAGCGGGCTATCTTTGCTTCTAGATCCTTGTGGATGCTCTGGGTCCCACAGATGAAACGGGTAGAGCTAAGGCCAGCTCCAAATTCCTCCAGGGCCTGCAGACCTGCCTGGATCACCTCAGGGTGGCTGCTCAGGCCCAGGTAGTTGTTTGCGCAGAAATTCAGTATTCCTCCGGAGACGCCGTCCACGTGGATGCGCGGCCCCTGACGAGACGTAATGACCCGCTCGCTCTTCCAGGTGCCAGCCCCGCGGATGGCGTCCAGCTCCTCCTCCAGGACGCCACGCAGCTGGGTGAGCGCCGACAGCGCGCGGCGGCCGCGGGGGGCCGCGGAAGGAGCAGCGCGGAGCACGCGTCCGGCCCACATGGTGCCCGCTCCGCCCGAGCGCGCCCGCACTGC…	AAAAAAAAAAAAAAAAAAAAAAAAAAAAAAGAATTTAAATTCCTAATATCATGACAGTGAGCTCTAGGTAAGGATATATTAGCAAGCTTTCTTCTCCATGAGTGGACATAATTTGCTATTCCTAAGATGGTAACATTAGAATTATTTT
GCSH	5:70745591-70757292	GCSHL1	7:18091713-18091731	NA	NA
GGTA1	9:60985117-61042525	GGTA1L1	12:42170095-42170111	CCCGCGCCCCGGCCCCCGCGCCCCGGCCCCCGCGCGGCCGCGCCCTGGGCCGCCTGCAGTCGCCGCGCCCTGGGCCGCCTCCGGCCGAGCGAGCCGAAATGCTGACTTTTAAAATGAGAAACAGAATTATCTTTGATGAGGCAAGGGGGAAATAAATTTTACAGCAGAGGAAATCTAACCCATTACAGTTGTAAGTGAATAGAGAAGATAACAATAAATAATATCCAACAGTGAAAATAGTAAAGGAGATAATGTTGTCTGGAAAGTAAAAATTTACCAAACTTTCATTTGATCATAAGCAACATTAACAAGAGCCTAGTGCACAAGGTCAAAATATCGT	GCAATAGCTTAAAATTCTATCAAAAATAAATCTATTTAACATAGTAGTTTGACTAAGTCATTATATCCCAAAGTTTTCTACATAGATAATCTCTTTCTTTTTCTCATTCTTTTTTTTTCCCTACACTGTGTAGAAATGCTGACTTTTATTTTTGTTTTTTTTTTTTTTTTTTTTTTTTTTTTTTTTTTTTTTTTTTTTTTTTTTTTTTTTTT
GHITM	4:32402210-32417905	GHITML1	17:36228859-36228877	TATCTAACACTTCTTCACATTCCCTTTATCTACCCACTGGAGGTACTAAATATCTATTGATTGGCATGCAGCATAAAAAATAAAAATGATGCGGCAAATCTAAAGAGAACAATACAGAAAACAGCTATCATATAAATAGTTTAAGGAAAATATAAATTGGAGCGGGGAGCCGGCCGAGCGCCGAGGAGCATTTCAGATCTGCTTGGTAGACCTGCT	GAGTGGAAATAGTCATATGCAAGTAATTACTGTAATGAACAGTGTTAATTTTATACTTTGAGTAGTGTGTAAATTAAATCTTTAAATTTCCAGAAAGTTTAACAAGCCCATAAGAAATTTTATAGTTTGGTCCCAATTTATATTTTCCTTTTTTTTTTTTTTTTCACTTATATCTG
GLO1	12:7584141-7609615	GLO1L1	22:33354852-33354867	TGGTACCCAGATATTTGGTGAAACATTATTTTGAGTGTTTCTGGAGAGTGTTATTTGAATGCGATTAACATTTAAATCATAGCGCGGGGCGGGGAGCGGCGTGGGTGGCTGCGGTGTTTTCGCGA	GACAATTCCAAAATCTGCAAGATGGGCCAGGCTGGAGACCCAGGGAAGAATTGATATTCCTGTCCAAGTTCAAAGGCATCTGCTACTGGAATTCTTTCTTTTTTGGAGGAAGTCAGCCTACTGGGAGCATTAACTGATTAGATGAGGCTCACCCACATTATGGAGGGCAAACTACTTCTCTCAAACTCTAATGATTTAAATGTTAATCGCATTCAAATAA
GLO1	12:7584141-7609615	GLO1L2	25:47308121-47308136	NA	NA
GLO1	12:7584141-7609615	GLO1L3	27:28390686-28390702	CACCCACGCCGCTCCCCGCCCCGCGCTGCCCCGCCTGGCGACGCCCCCTACTAGTAAATTCTAACAGACTTATTTCTGTCACCATCTGACTTCTTTCCTTCAGAATGTTCAATGCTGGGAAGGCTCCTTCCTTTCCTTGAAACATGGAAATACCACATTTT	TTCTCATCTCACAACCTAATGAGCTTTGTCTTCCAGCTGCTCCTCAGTAAGTGTCTCATTCTCATCAGAGGCTTTCCTACTAGTAAATTCTTTTTTTTTTTTTTTTTTTTTTTTTTTTTTTTTTTTTTTTTTTT
GLRX3	28:38724895-38755323	GLRX3L1	X:33967251-33967268	CGCCGCCTCGGCCGCCCCCGACGCGATGCTGCCGACGCCAGACAGGAGCCCCTCTGCCTCCTTTGAATGACTCATTGATTCATTAATTAATCTCAACAAAAATTTATTGGGCTTCTAGAATGTGCTGGCATTGCCCTAG	CCCTGCACCCCCATGCTGCCTCTGCCCCTCTTGACTGAATGTGTCCCTCAGGATAAGGCAACAAACCTGTCCCCTCTGCCTCCTTTGTTTTTTTTTTTTTTTTTTTTTTTTTTTCTATCT
GLT8D1	20:37093826-37103213	GLT8D1L1	6:50462540-50462554	NA	NA
GLUD1	4:34629046-34662711	GLUD1L1	3:5248620-5248636	NA	NA
GLUD1	4:34629046-34662711	GLUD1L2	17:43213047-43213063	ATTTTATTCTCTTAAAATAAAATAAGTACATGCTGCTGTAATAACATTGCCTTTAATCACTTAAAAAAAAAAAAAATAAAAATAAAGGAAATAAAAAGGTTAAATAAAATAAAATAAAACAAGATAGAATGGTTTCCTAAATGCCATTGAATAACTGGGCAAAAAAAACAAAAAACAAAAAACAAAAAAACAAAAAACAAACCTTAACCTCAAAAT	GGGGGGGCTAGGAAGGTGACAGTCCATGATGAATGACTCTTGTGTGAACCTAAGATAAGTTCACCATTGAAGGTTAAGACTGTGGAGATAAGGTAGGCGCTCTCATTCCACCAATTTAAAGGAAATAAAAAGCCTGCGCCCGCGGCCCCCGCCCGCCGCCGACGCCCCCGCCGCGCGCCGCCGCCGCCACGTACCGCCGCCTGGGCGTAGCGCTGCTGCTGCCCCGC
GLUD1	4:34629046-34662711	GLUD1L3	35:26284460-26284466	ATTCTGATATTTAACAAAGGTAACCGTCCTATTACTTTTCAGAACACAACCCAGCACGGTTTGTGTTCAGCAACAGTTTTTTTTTTTTTTTTTTTTATTATTTTTTTTTTTATTTTTCTTTTTTCTCATGTTTATTTTTTTCATTTTCTTAATGCTGTA	GTTAGAAATTTTGAAAGGATATTGTTTAAAAAAAAAAAAAAGCTCATTCTTACATAAATAATATCTAGTACTTCATTGGGACACTACTGTTTAAAAGGCCCTCGTGAAATAACTCCCAAACAAAACACTCAACCCAAGGATGTTTCCAGCCCACAGCAAGTTTTTAGAACTCATCTTCTGGTTCCCTTGTCGCTGGTATTCGAGCACCTTTCTCCTTTGCTCCTGAGGTGCCATGTCCATGTTTTTACTGAAACATCAGCGAGTCCTCCTGGAGGTGCAGACACCATAGTCCTAGGCCCTGTGTGGGTCTCTCGTGGCGGGTTCCACCGTGTCCTTTGTACCCCTTGAGGTCACAGCATCCTTTCCAACGGTGCCGCCCCAGCTCCACAGACACTTGGA…
GLUL	7:15730898-15740241	GLULL1	4:19685397-19685407	GCTGCTCAGAAGCTCCCCTCCGCTCCCATTCTCGGCTCTCCATCATCCAATTTTAAAATAATCTTTATTAAAAGCTTTGTTTGGGGGGAATCTCTGGGTGGCTCAGTGGTTTAGTGCCTGCCTTTGGCCCAGGGTGTGATCCTCGAGTCCTGCGATCGAGTCCCACATCCGGCCCTA	AAAAAAAAAAAAAAAAAAAAAAAAAAAAAATAAAATTGGATGATGGGGCACCTGTCTGGCTCAGTCCAAGCAGCATGTGATTTTTTTTTTTTAAGATTTTATTTATTTATTCATGAGAGACAGAGAGAAGGCAGAGACACAGGCAGAGGGAGAAGCAGGCTCCCTGCGGGGAGCCCCAGGTAGGACTCGACCAT
GLUL	7:15730898-15740241	GLULL2	31:12612186-12612203	NA	NA
GMDS	35:2108459-2519902	GMDSL1	3:91667296-91667313	NA	NA
GMFB	8:30394020-30408408	GMFBL1	6:68299040-68299055	TTGAATAACCAGAACAGATGTTAACCATTTGAAGTGATTACATGATAGACTTAGTCAGATGAGCTGGGTGCTACTTTAAAATTATACACTGGAAAGGGGCCCGAGGGAAGGCGAGGAGCTGCTGACGGCCGGAA	AAAAAAAAAAAAAAAAAAAAAAAAAAAAATAAAATTATACACTGTGTTTATGAAAACTTATTTTTCTTTTTAATTCCCCAAGGGAGAGGGTTGCCAGATTCAGCAAACAAAACTGTAAGACATCCAGGTACAACTGAATAAATTGAAAAATTCAAAAAGTAAAATTTGAATAAACACCAAATATT
GNAS	24:43643409-43658641	GNASL1	5:33760401-33760415	CGTGGGAGTTGGTTCCGCGTTGGGGATCCAACAGGGCGTCTCGTGCCTCCTTTGCCCTGCTTTGCTGCCTTTTGGGTACCTTGAATGCATAAATAAATAAAACTTTAAAAAAAAAAAAAGAAATGCACCCACTAGGGTTTCCAAAGAGCCCCTTATAGATAGGTGTACAGGGATGACTGGACAGCTGTCCACAATCATGAAGAACCGTATCTGGCATTAAA	GGGTTCTGCATTGGGCTTCCCACAGGGAGTCTGGTTCTCCCTCTGCCTGTGTCTCTGCCTCTCTGTGTATCTCTCATGAATAAATAAATAAATTCTTTTTTTTTTTTTTTTTTTTTTTTTTTTTTTTGCTCACATTTAATTTTTATTTTTATTTTTTTAATGC
GNB4	34:12818063-12849822	GNB4L1	32:28853029-28853036	GTAGGATTTATCCCCCGGGACACAAGGCTGGTTCAACACTCGTAAAACAATCAATGTGGTGATGCCTCTTCAAAATTATGGGATATTCGAGATGGAATGTGCAGACAGTCTTTCACTGGACACTGTGTC	AAAAAGAACAGAGAATAGGCCTACAAGATAAAAAAAAAAAAAATCTGCAGAATGATAGGTACGGTTCCTCCCCCGGGACACAAGGCTGGTTCAACACTCGTAAAACAATCAATGTGATTCATCATATCAGCAAGAGAAAAACC
GNPDA1	2:36938682-36949657	GNPDA1L1	11:47593617-47593716	NA	NA
GNPDA2	13:41207192-41228570	GNPDA2L1	1:583881-583935	NA	NA
GNPNAT1	8:28992173-29005511	GNPNAT1L1	14:37589985-37589999	TACTCTTTAACAGTTACTTATCCACAAAAGGGGATTGTGTTCTGTTGTTGTTGTTTGTTTTGGTAAAGAATTAAAAGATAAAAGGAGGGAGAGAGTCCGACGGGCCTGGAGAGGAGCGCCGAGCGCGAG	GTCACAGCATCCAAAAGCCACCATCCATAACTTAGAAAACATTTTTGCAGAGTGATTTCTCTCATATCAGTTCAAATTCTTATACTCTTTAACAGTTACTTATCCACAAAAGGGGATTGTGTTCTGTTGTTGTTGTTTGTTTTGGTAAAGAATTAAAAGATAAAAGGAAACTCAAGGAAGATCACCAAAAAAATACTACAGGAAAAAAAGATGAGTCTGTTTAGTTTCCCTAAATTGGAAGACTTTGAAAATAAATTACCTTATGCCAATTATAACTCCATAAAAATTAAACTACCAATATGCTGCTAAACATAAACAAAAACATGGAGGGAACATGTTTACTATGAATTGATATCAAGGTAGTAACATTTTTTTATTTTCC
GOLGA5	8:1874716-1907251	GOLGA5L1	19:26134674-26134693	NA	NA
GOLGA7	16:24083498-24102024	GOLGA7L1	11:51415321-51415338	GGTTCTAGCCAGGTCTGTTAGGCAACAAAAAGAAATAAAAGGCATCCAAATTGGAAAGGAAATAAAACTAAAACTATAAACTTTGTTCACAGGAGACATGATCTTGTACATAACAAATTCTAAGAAATGCATTTAAAACCTATTAGAAATAATAAATTCAGCAAGCTTGCAGACTACGAGATCACTATACAGAAATCAGTTGTATTTTTCTACACTTGCAATGAGCAATCCAAAAATTGAATTTTTAAAAATTCCATTCTTGACCTGGGCCCGTGGGGAGGGGCTGGGGGGCGGGCGGGCCGGAGTCTCGGGTCCAGGCCGGGGATCTGACCCGAGGCTGTTGTCCCCCCAAACCCGCAGCGCGCCGGTCCTGTCCTCGCCATGAGGCCGCAGCAGGCG…	TTTGGGAAAAAGTTCAGAAATATATTAGGAAAGAATGAAACCGTTAAAAGTTTTACTTGCAGAGATACTGTAGGTGCTAATACTGGATTTAAATCTTTCAGATTTAGTTTCTTTTATGGATCTTTTATTCAGTAAATCCCATCGGTCTGTGTAATATTTTAATTGTATAAAACTCCTTTGTTACTTTATAGCCTGTAATAATGTGTCTGTCTGCCTTTTAAACCTGTTGCAATAACTTTGCTGAAATAACTCATTAGTAAAACTTTTCTTAAACAAAAAAAAAAAAAATAAAAAAAAAAAAAAATAAAAATTCCATTCTTGGGGGTGCTTGGATGGCTCAGATGGTTAAGCATCTGCCTCTGGGTCAGGTCATGATTTCCAGGTCCTGGGATGGAGCCC…
GOLGA7	16:24083498-24102024	GOLGA7L2	14:28953722-28953739	NA	NA
GON7	8:62406682-62410476	GON7L1	35:22157531-22157548	GCCCAGCAGCTCCATGACGACCGCAGGGCTTCCACAGCCAGCCTCTTTTCACTAATTTTAAATAGAAACAATCCTCCTAATGGATTTAAGTCCATAACAAAATTAACTAACCACTTGACAGAACCACTGAAAGGGAAACTAGGTTTAAATAGCATTG	AAAAAAAAAAAAAAAAAAAAAAAAAAAAATAAAATTAGTGAAAAGATCCTTTCATAAAGTAAAGCTTGCTTTGGAGATGTGAATGCTTAACTTCCTTCATCTCAGTTTACTAGGTTATAAATGTGGGTCTTCATTGACAGTACTAAGTTTTCAGTACTAAGTGCACGAATGAACTCTGTCCAATGTCTTGATCATATTG
GOSR1	9:44478826-44537405	GOSR1L1	11:57621311-57621326	AGCAGCCATCTTTGTTGTCCAACGTCAGTCGGGATCTAGTGGAGGGTTTTTAACATGAAAGAATGTTGTACTTTGTCATATGATTTTTCTGCATCTATAAAATAATCTTATGATACTTACCCTTTCTTTTATTAATGTGGTTTATCATGTTAACTGATTTACAAATATTGCAAAAGACCCCAAACAGCCAAAGCAAACTTGAAAAAGAAAAGCAAACCTGG	ATTTTTCCTCCTTTTTTTTTACACTTATATAAAAAAAAAAAAAAAAAAAACCCTCCACTAAGTAGGGTTGGAGGGAACATACCTCATATAAAGTCCATATATGAAAAAGCTACAGCTAATATCATTGTCTATGGGGAAAAAAGGAAAGCCTTTCCTCCATGGTCAGGAACAAGGCAGGGATATCCACTCTCACCACTGCTATTTAACATAGTAGTGAAGTCCTAGCGACAACA
GOSR1	9:44478826-44537405	GOSR1L2	23:31063709-31063725	AATTGCTGGTTCCTGCAGCCATCTTTGTTGTCCAACGTCAGTCCCCTATGTTCTTTTGATAGGTCTCTAGCATTCATTGAACATTTCCTTACTTTATGAAACAACAAAATATTCCTATCTTCTCTTGTACATTTTTGTCCCCGCCTGGAATCAGCCCTTTTTTCTTAGGACCCCCAGTTCCTTTTAGTGGAGAATGATATTTAGAAACCAAGATTTGGA	AAAAAAAAAAAAAAAAAAAAAAAAAAAAAACAAAAGAACATAGGGATGAGCTGAAGGAGCTCAAAGGTGCCCCTCCCCCCAAATTTCTTATTAATCACAAGTAAGGGGGGCGCCTGGGTGACTCAGTGATTGGGTGTCTGCCTTCAGCTCAGGACCTGATCCTGGGGTCCTGGGATCACATCCGGCATCAGGCTCCCTGTGGGGAGCCTGCTTCTCC
GOSR1	9:44478826-44537405	GOSR1L3	24:33841746-33841768	CCCCTTTTTTTTCTTTCTTTGTATTTTCTGGTGCAGTGAAAAGAGTATGGGGAAAGAAGGAAATTAAAAATTGTTAATTATAGGGACAACAAAGATGGCTGCAGGAACCAGCAATTACTGGGAAGATCTCAGAAAACAAGCTCGACAGCTGGAAAATGAACT	AATAAAAAAAAAAAAAAACAAAAAAAAAAAATTTTTTTTTAAATTTAAAAAAAAAAAAAAAAAAAAAAAAAAAAAATAAAAATTGTTAATTATATAATTAAAAGATATTAATGTTGCTGTAAATTTATTGAGGTGAAAAGATGTACATTCCATTAAGTGAGACAGCAGGTTTGAGAAGACCAGATACAACATGATGAATGTTTTTATTTTAAAAATGCACTTAGGTACATAGAGAGGTATCGAGAAATAGTCTAGAATAGTATTC
GOSR1	9:44478826-44537405	GOSR1L4	24:42095085-42095212	NA	NA
GOSR1	9:44478826-44537405	GOSR1L5	29:3671973-3671978	AGAGAGGCAGAGACACAGGCAGAGGGAGAAGCAGGCTCCATGCAGTGAGCCCGATGTGGGATTTTATCCTGAGTCTCCAGGATCACGCCCTGGGCTGAAGGCAGGTGCTTAACCGCTGAGCCACCCAGGGATCCCTACATTTGTCTCTTTAAATGAAAAGTGGGGGGACAACAAAGATGGCTGCAGGAACCAGCAATTACTGGGAAGATCTCAGAAAAC	GGTGTTGCACCGCGTTCTAGCCCCACCGTCAATCCAGGTTTTGATCCTGGACACCCAGGATGGATTCCCACCTCAGGCTCCCTGCATGGAGCCTAGTTCTC
GOT2	2:57968833-57994219	GOT2L1	18:18231783-18231801	NA	NA
GPBP1	2:44243833-44316498	GPBP1L1	X:20794055-20794069	NA	NA
GPI	1:117922380-117948325	GPIL1	9:14178518-14178536	NA	NA
GPI	1:117922380-117948325	GPIL2	32:29874945-29874958	NA	NA
GPM6B	X:10214889-10260905	GPM6BL1	16:34596310-34596323	NA	NA
GPN3	26:8279100-8291584	GPN3L1	32:17193562-17193562	NA	NA
GPX1	20:39889165-39890253	GPX1L1	4:64233885-64233903	TCATGAAGAGCCTAGACTCAGACCAAAACTTTTAGACTCAAAACCCTCGTCTTAACCACTAAAATTATGAAGCAGGCTTGTTTCTGACATTAACCATCACAAGAAGTTTACAATCAAAATGTTCCAAGTGTAACCAAATGGAATAGGGAGAGAGTTAAATGACTTTCAGGGAAATGAAAATTGACACCACGCGTCCGCTGGCCGGCGGGGAACCTATGAGCCTGGGTTCCCTGCGGGGCAAGGTGCTGCTC	GTTGCCTGGAACTTTGAGAAGTCCCTAGTGGGCCCAGATGGTGTGCCTGTGCGCAGGTATAGCCGCCGCTTCCCAACCATCGATATCGAGCCTGACATCGAAGCCTTGCTGTCCCAGGGGCCCAGCTGTGCCTAGGCAACCCTCCTTTCCCTGCTGCTTGACAGTCACAGCGCTGCCCTCTGGGGATTTCATCCATGATGGTGTTTCCTTGAAATCTGCATGGAGGAACGCCTGATTTCCAGGAAAGTCCCCTGAGCTGGGCTTGGGCTCTTCTTGTCCATCCCAGAACCCCCTCCCTAACTAGGCTCCTCACTAATAAAGTGTTGGCCGTCAGCAAAAAAAAAAAAAAGAAAATTGACACCAGACGTGAAAAGTTTTGGATCCCATAAACCAATTATT…
GPX2	8:39322040-39325833	GPX2L1	26:27996046-27996051	NA	NA
GRPEL2	4:59603384-59614491	GRPEL2L1	31:7941669-7941681	CATATAAATATGCATATTTAATATATATAATAAAAGCATACAATATCATGCTTTATATGATAGTTTCTATAATATAGAAACTTATCGCTCCGTCAGCCGAGATCGGGAATATGGCCGCGCGGTCTGTATGG	AAAAAAAAAAAAAAAAAAAAAAAAAAAAAAAAAAAAAGAAACTTATCTCTTTCTCTATAGTTTCTATAATATAGAGACTATTATATATTGATTTCCACATCTTTGTACATTTGAAAGAATAATGAAGTTGTGTTACTATA
GRSF1	13:60088198-60102292	GRSF1L1	32:15113889-15113907	NA	NA
GSKIP	8:65110659-65131205	GSKIPL1	11:49270864-49270877	NA	NA
GSR	16:33633949-33679592	GSRL1	7:4049005-4049021	NA	NA
GSTK1	16:6411678-6416135	GSTK1L1	8:42199990-42200003	GAGTGGTTTCTAGTTTTAGTAGTGGAAGCCTTTCTATTCCAGTTGGATTGATGGCTGATTTCATGTGCAAGAGAAAGTATTTTGGGATTCATACTCTTTAACAAACCATCCCTGCAAAAAGCTGGAGTCCATTTGAAAGATTATATGCAAGTGCATGGCTTGTGTCTCTTTTAAAATAAATTCAGAGCCGGAGCCAGAGCGGGGACGGCTGCAGCATGGGGCCCCTGCCACGGACCCTGGAGC	AAAATCAACTTTTCCTCAAAAAAAAAAAAAAATATTTGAAAAAAAAAAAAAAAAAAAAAAAAAATAAAATAAAATAAAATAAATTCAACAAGCAAAAGCAGCTCAGAATGGTTGGGGCGAATCAGGGACTCATGGTTGTGAAAGAAGCAGACTTCAAAGCATGGTATGAATTTTCAAGTTTTATTT
GTF2A2	30:24502825-24522248	GTF2A2L1	6:28535522-28535540	AGAACTCTTTTTATCAAACCAACAATTATTAGATTTTCAGCATTGTTTTTTCCCCTCTCTGGGACCAAATGTTGGGTACCTTTTGTCAGTTTTTTTTCCCCAAATTATCATTTGAGAGAACATATATTTGGACTATGACAGAGGTTTGGCTACTGGTCTCCTTGAGAGCAGCATTTTTGGTGGAAATATCAGTGCTGTAGGGTCCGCTCCGCGGCGGGAAGCGCCTTCCCCACAGGACATCAATGCAAGCCTGAATAAGAGAAACGATTGCTTCCTCCT	CTTGAATAAACTCATTTTAAAACTCCAAAAAAAAAAAATAAATAAATAAAAAAAATAAAAAAAAAAAGAAATATCAGTGCTGTAGATTACTTTGGCTTCTGGGGAGTAGAGTCTGGGATGCCCCAGAATCTTAACAGCCAGAGCTGCTGACAAAAGTATAGCATCTCATAAGTTTTGGGCAGAGGATCCATTTTTTTTTTATTTTTGTATTTTCTTTATTAGAGTTCAATTTGCCAACATATAGTATAACACCCAGTGCTCATCCCATTAAGTGCCCCCCTCA
GTF2A2	30:24502825-24522248	GTF2A2L2	31:13632714-13632793	NA	NA
GTF2E1	33:24107650-24201654	GTF2E1L1	1:66556421-66556441	ATAAAACCCCCGGATCACATACTTGGCTAACCTCTTCAATGCTGCGGGAACCTCGGTGAGGACATCAGGATCTGCCATCTTTAGCAGCAAACTTCAACTCGAAGTCAGAGATCTTCAGTAACTGGCAGCCTCTGTCACACAGGTTGACCCAAAAAACATTCTGAAAACTTCCTGAATTGATTGTCAACGTTTAAAAGTCGTTGAGATTTCACATAAATTTCAACTTTAAGCTTGAAAAGTGGAAATAGCAAAACGAATCCTCGAACACTCCCCTATTTATTTATTTATTTATGATTTATTTATTTATGATAGACCGAGAGAGAGAGAGAGAGAGAGAGAGAGAGA	GAATACTCTTCCCATTAAAAAAAAAATAAATAAATAAATAAATAAATAAATAAATAAATAAATAAATAAAATAGAGTGCAGAAGTTCCTACTCTACATGAAATGGAAATCTGGAAAGT
GTF3A	25:12171058-12183491	GTF3AL1	23:31279982-31279997	GGGCCGCCGCTCAGCCACGTGCCGAGGCACGTGCGGCGAACGGCTGCGCGCGGCCCCGGAGCAAGGTTTTGGTTCTTGACACCGGAATCTTGATCTGTAATTTATACAAACACTATTTGTTTCTTTGCCTTTCTCCTTTGAGCATTCCTCTGGCTGTGGTCATTATTAAGCATCTACTTTATGTGGCCACAGTATAGGATTTGGGTCCTGTACAGTATACAGTAAAAGCTTTAATCCATGGCAGATTGACTTCCCAGAGACATTTCCATTTAAATTTCTAAAATAAAATTGGATACTTTTACCTTTTAA	AAAAAAAAAAAAAAAAAAAAGAACCCAATCCTTCTTTCCAGATTCCTATGATAATGTGAAAGGAGGATATCAAATAGATTTAAATCCCCAAGAATAACTGCCAAGCGTGTGAATGTTTCTAAATTTTTAAAATACAATATAAACCTTTTTTGCTCCCCCAAAGGGAAAACTCTTATACATTACCTTGTACAGAATAAATAACTGAAGAGACTGGGTGCGGGTGAGGAGGAAAG
GTF3C6	12:67491034-67505012	GTF3C6L1	12:63890615-63890620	GCGTCCTCCGGGATCCGCTCCTCGGCCGCCGCCATTGTCCCGCGCCTCTTAATAAATTGATTTAGATGAATTCTATGTGAACAGATTTTTCATCTACTTACTTTTTTTTTGGTTGCTGTGTGTGTTCTGATTATCTTG	CTTAAGTGTTCATACACTTGAACTCAAAAAGGAACATTCTAATTGATGGGTCATTCCTTTTCATAACCAATCGTGTGGGTGAATTTCTCGCTATTGTCCCGCTACCCCATCTCCAAAGGAACTTTACTTAATAACGTGATGCATATGCATT
GTPBP4	2:33936629-33955947	GTPBP4L1	2:57902384-57902400	ATATGGAAAGACCCCGAATAGCCAGGGGAATATTGGGAAAAAACAAACAAACTCCAGATCAGGGGCATCACAATGCCAGATTTCAAGCTGTAGTACAAAGCTGTGCTCCTCAAGACAGTGGTACTGGCACAAAAACAGACACATAGATCAATGGAACAGAATAGAGACCCCAGAAATGGGCTCTCAACTCTATGGTCAACTAATATTCGACAAAGCAGGAAAGACTATCCACTGTAAAAAGGACACTCTCTTCATTAAATGGTGTTGCGACAAGTTGACAGCCATTTACAAAAGACTGAAACTAGCCCCACCGTCCGGTGTGGCTGGCAGCCGGCATGGCGCACTACAACTTCAAGAAGATCACGGTGGTGCCGTCGGCCAAGGACTTTATCGACCTGA…	GGCGAACACCGAGATCTACCCTCTTTCCCTACACGACGCTCTTCCGATCTAACAAGTTCGACTGCGGACTATTCTCTCACACCAGACACAATGATAAACTAAAAATGGATGAAAGATCTAAATTGTGAGAGAAGAATACATCAAAATCTTGGAGGAGACCACAGGCAACACCCTTTATGAACTTGGTCCCACAGCAACTTCT
GTPBP4	2:33936629-33955947	GTPBP4L2	11:3485398-3485413	NA	NA
GTPBP4	2:33936629-33955947	GTPBP4L3	X:77372738-77372753	GCCATCGGCGAAGTCCCAGAGCTTGGGCCAGGCAGCTCTCTGTAGCTGAGGAAATGCCTGAAAGGTGTAATGGTTATGGACTTCCAGCTGACCGCATTCTAAGAGGCCAAAGCAGAAAGTCTTCATTGAAGAGGGTTCTGGGTAGTCCATCTTTAAGTCTCTCACAGCCTCATTATTAAATGATACTTTGGCGAAGTATCCAACTGCAGGTTGACAGGCATTTTCTCTCACCACATGCTTTTCTTGATTTAAAAAAAGGAGGTAGCCCGCGTGGCTGGCAGCCGGCATGGCGCACTACAACTTCAAGAAGATCACGGTGGTGCCGTCCGCCAAGGACTTTATCGACCTGACCTTGTCGAAGACTCAACGCAAGACTCCGACGGTCGTCCACAAACATTA…	TAAGGCTACGATGTAAGCATAGAGAGCACAATAGCAGACAAAAGGACATGATGCCTGAAAACAGAATACTAGACAGTGTGACAGTATACCTCCTTTTTTTATTTTTTTTTTTTTTTTTTTTTTTTTTTTTTTTTTTTTTTTTTTTTTTTTT
GUCY1A1	15:53172914-53236200	GUCY1A1L1	1:25218446-25218460	TTCTTTTATCAGATTACAAAAATTATTTTATTCCTAGTTTACTAAGGGTTTTTAAGATCATAAATAATTGAATTTTAGCAATTGTTGTAGCTACTGAGATGATTATATGTCCTCTTATTTTATTTTTTAAAGATTTTATTAATTTATTTTAGAAAGAGAGAGGGAGAGAGTCTCAAGCAGACTCCCTACTGAGCATGGAGCTCAAGACCAGGTTTGAGATTTGCACAATGTTTGTCAAGAGGAGAACGCAGTAGGCAAGACTGGGAGAAAATTCTGCATATGTGACACTCCAGTCACCCGTATTCTTGATCTGCTAGTGGCTTCCATTTGTCACTCCGCATAAGAAGAACAGCTTTCCCGGAGGTGATCCACAGCAGGGTGAGAGGCCACTAACACCAT…	AAAAAAAAAAAAAAAAAAAAAAAAAAAAAAGACCAGGTTTGATCTCACTACCCTGAGACCACGACCTGAGCTGAAATCAAGAGTCAGGCGCCCAACCTACCCTTATGTCTTCTTCTTTTAACATACCAAATTATATTTATAGGTTTTTCTAAGCTATTCAACAATGTTGAAATTCTTGATCATAATATGATCATGGATTAAGAGGCACAAAGTATTCTTTCGCTAAAATATTGTTTTAAATACTTGCATTTAGGGGCATGTACACACTCTCTCAAAATAAATAAAATCTTAAA
GULP1	36:30108886-30248805	GULP1L1	3:66789669-66789684	NA	NA
H1-8	20:5614822-5619136	H1-8L1	10:53652469-53652489	GATCTTCTCTTTCTTCTCCTCCCTATGCCCCTCCCCTCATTCACATGGGCTCTCTCTCTCTCTCTCTCTCTCTCTAAAATGATAAGTCTTAATCCACCATCCCCAAGGGCACGCATGGTGCTGCTTCTCC	GTAGTAGTAGTAGTAGTAGTAGTAGTAGTAATTCCACACAACTATTTTCAAATGTTACATCATTTTATTCTTATAATAATCTTGTATGGTAAGTATTCTGTCTCTCTCATCTCTCTCTCTCTCTCTCTCTCTCTCTCTAAGACTTATCATTTTAGATAAGTGCTACAATTTGCTATTTTTTTTTTTTTTGAGGGGAAAAAAAAGTCTTTATTGATAAATAGTTTACAATGAAATAAATAGAGTGACAGTTTGTTGGGGAATAAAAACTCAGGCAGAACCTCAGTGTCTCAACCC
H2AZ1	32:21889890-21892165	H2AZ1L1	15:35275877-35275986	NA	NA
HADHA	17:20307207-20355659	HADHAL1	34:39045291-39045307	AATAAATAAATAAATAAATAAATAAATAAAAAAAATAGAGAAGTCAGAACAAAATTTTAAAAATAATAATTAGACACTTTCGTCCTCCTCAGCTCAAGATGGTGGCCTCCCGAGCTATAGGCAGCCTCAGCCGCGCCACTGCCTCCCGGATGTTCCGCTGCCCAGGTTATGTATGCC	AAAAAAAAAAAAAAAAAAAAAAAAAAAAAATAAAAATAATAATTAAAAAGAAACACTTCAAAAGAGTCAAAAAAAAGGAAAGAAAAGGGAAAAACAGTCCATGGAATGTTGAGGATGGTGATATTTAACGAGCCAGAAAATAGTAATAGGAACTGTGAAGCTAGAACCGAAGTCCACACGTTGTTGCATGACGGAGAGCAAAGGGAAAGGTGCCG
HDAC1	2:68901339-68936399	HDAC1L1	3:25514560-25514574	TGCACCCAATAGGAGCACCTAAATACATAAAGCAATTATTAACAGACATAAAGGAATAAATTTACAGTACTACAATAAGAGTAGAGGACTTAAATACCCCCCTTACATCAATGGATATATCATCTAGATAGACGATCAATAAGGAAACAGTGGCTTTGACTGACACATTAGACCAGAAAAGGCTAACTGATATATACAGAAATTCTATACCCAAACAGCCGAATACACATTCTTTTCAAATGCACATTGAGGGACCGACTGACGGGAGGGACGGGAGGCGAGCAAGATGGCGCAGACTCAGGGCACCAGGAGGAAAGTCTGTTACTACTACGACGGGGATGTTGGAAATTACTATTATGGACAAGGCCACCCAATGAAGCCTCACCGAATCCGTATGAC…	AAAAAAAAAAAAAAAAAAAAAAAAAAAAAACAAATGCACATTGAATACTCTCCAGGATAGACTACATGTTAGGCCACAAAACAAATCTCAATACATTCAAGAAGACTGAAGCTGTATCAAGTATTTTTTATGACCACAATGGTATGAAACTAAAAATCAACTACAAGAAAAATTCTAGAAAAAGCACAAATACATGCAGGATAAATAACATGCTACTAAAAAAATAAGTAAGTAAACCAAGAAATCAAAGAGGAGACCAAAAAATACATGAAGACAAATGAACACAAAA
HDGFL3	3:54903955-54978853	HDGFL3L1	X:64925788-64925804	TTTGCTTCACTTGTACAAGGTTGCTTTGGCTATTCAGGATTTTTTTTTTTGTTCCATACAAATTTTAGGATGGTTTGTTCTAGCTCAGTGAAAATTGCTGATGGTATTTTGATAGGGATTGTAGTGAATATGTAGATTTCTTTGGGTAGTATGAACATTTTATTTATTTTTTTTTGGGAAAAAAATAAATCATTGCCTTTATTTTGGAATAAC	CAAAATTGAAGATGACACTAAGAGATGGAAAAACATTCCTTGCTAGTGGATTGAAAGAATAAATATTTTTTAAAATGTTCATACTGAAGATCGTGTTTGCGGTCGCTGCCCGAGGAGGAATTCGGAGGAGGCGCGAGGCCCGGCGCT
HIBADH	14:40672294-40780608	HIBADHL1	12:6938254-6938270	NA	NA
HIBADH	14:40672294-40780608	HIBADHL2	X:123049841-123049858	ACTGCGAGTGTGCGCCGCGGAGCGGGCGGGATGCGCCGCGGCGTGGGGCCGCGCGCGCACGCGCTCTCCATATACATTTTAGAACCAGCTTGTCGGTTTCTAGATAAAGACCTCCTTTTTGACCCGGACGGCATGAAGTCTGTAGCTGGATACGGGGACAATGAATGTCTTAAAAATACTGCCTTGCAAGAGAAAGTATGTAACTCCAT	CCCGTTGGAATCCTGAGCCACGGAGTCCAAGAGCATAATAAATGATTGCTTGGCTCCATGAAGTTTTGGGGCGATTTGCCATCATCGCTGGGAACACTATTCTAGGTAGGCCTTCGCATCTCCATATACATTTTATTTTTTTTTTTTTTTTTTTTTTTTTTTTTTTCTTTTAATTTTTTTTTAATTTAAAATAATACTTTTTTATTTAGTATAAAATAATAATTATCTAAAACAAATATCATC
HIBCH	37:841385-943972	HIBCHL1	2:39378744-39378762	GTCTGTTTAGTGTTATCACTCCTGCACAACCTCTTCTTTCCAATAGTACTTCTCCTGCTGCATCTGTGTGCTTAGACATTCCCAAATGTTGCAGTATGACATTAGTCCTTCTGAATGAATTAAACCTCCACACCTGCCGCAGCCCCATCGCGGCGACCGGGGCACGAGCCGCCCGACACCCGAGACCGTCCTCCCCGCGGCCGCTGCGGCCCGCGACCCGAGGCCTCCGAGCGGCGGACCAAGAGAGTCTTTCTTGCCTGAAAAGTGCTCTATGGTGAAACAGGGCAGAATCATAGGAGGACAAGTGAAGTCTCAATATCCTCAGAGACACAGAAGGAATAGGGATGCCTGAGGGAAAGCTGAACTTGTTCTATAAACCACAAACCAGCATCAGATGGG…	AAAAAAAAAAAAAAAAAAAAAAAAAAAGAAAGACTCTCTTGGGAGATTTCTAAAGGTTCAGATTGTGTGCTGTATGGCTTTCCTGCAGTGGCTTAAAAGGCTCCCTCCCCTGCTGTTTATCTTCCAATATATATCCTCCATTTCTCTTCTCCACACTCCTACCTTGCAAGAGGTGATAGTTTTTCTCTATGTAGCGTTCCAGATGTTCT
HIBCH	37:841385-943972	HIBCHL2	38:15161943-15161960	NA	NA
HIGD1A	23:11893117-11903934	HIGD1AL1	14:38060261-38060276	NA	NA
HIKESHI	21:13210356-13249594	HIKESHIL1	X:111386698-111386714	AATATTTGTGAGTTTAGAAAAGAGCAGTGTCCCTGCATTCTCAAGTGAAGATATAGTTGATTCCAAGTTAGAGCATGTTACAATAAAAAAAGCTACTGTAAAAAGCCTTTTTGACAATAGGCACCACTAAATGTAATGCATTAGGAGGTATATTGTATCTTTGTTTTAATATCCCTATATGGGGCTGAGCGGAGTCGCCGCCATGTTTGGCTGCTTGGTGGCAGGG	AAAAAAAAAAAAAAAAAAAAAAAAAAAAAATTAATATCCCTATATGAACAGTGTGTAAAAACCACATAAGTGTTTCCCATTTGCAACTTCAATTTGAATATCATTTTATTTTTAAGAGAGAATTTTAGAAATATAGGTAAAATCAAACTATACACTGTTACTATGGTTATCGTCTGTTTAATGGAAGCATTTGAAGAATATTTATCCTT
HINT1	11:19551057-19555390	HINT1L1	3:54137642-54137658	AAAAACAAAACAAAACCCATAAAAGTGTGTCACTTAAATAGTAGAAAAAGAATTAAATAGATTTGTAAAAGGATTTATTTTTACAATAATCTATTTGTGACAAATCATTGATACTGGCTTTCCTTTGAGGTATTGATACAAAGTTTCCTTTAAAAAACATATGCAGAGCTTCTCCCCGGGGCGGCCGCGCGGGAGGAGGCCGCGATGG	AAAAAAAAAAAAAAAAACATATGCAGATTAATTAGGCTTTATGAAAAGCAAACTTTTTTTTTTTTGAAAAGCAAACTTTTTGATTCAAAGGACACCATCAAGAAAGTAAAAAGAAAACCCACAGAATGGGAGAAAATATTTATTTATTTTGATAAAGGAC
HINT1	11:19551057-19555390	HINT1L2	5:22310576-22310591	AAAAAAAAAAAAAAAAATCTGGTTTGGGCTATTTTTTAAATAATCGGGTAGGTAAAAATATAAGTTTGATGCTATTATAC	CTCTGGGTCAGAGAATTCTGAAGGGCAGGAGTGACGTGGAGTCTTACCATCACTAAGCTCTATTTTATCAAGGCTAGCAGATATTGGGTGTAATTATGTGGCATATGCAAAACAATCAAGCCACAAATGGCTAAAAATCTGGTTTGGAGGCTTGGCCGCGCACTCCCGCCCTCCGCCCGCCGCCCCGGCTCCTCCCTCCTCCCGAGCTTCTCCCCGGGGCGGCCGCGCGGGAGGAGGCCGCGATGGCCGATGAGATCGCCAAGGCTCAGGCCGCCCGGCCTGGAGGCGACACGATCT
HINT1	11:19551057-19555390	HINT1L3	7:11144855-11144874	AAGGTCGCGGCGCCTCGAGGCCGGGCGGCCTGAGCCTTGGCCATCTCATCGGCCATCGCGGCCTCCTCCCGCGCGGCCGCCCCGGGGAGAAGCTCCTCCCTAGAATTATTTTCTTAATTTCATTTTCAGATTATTCACTGCTATTGTCTAGAAATAAAATTGATTTTTGTATAATGATCTTATATCCTGCAATTCTGCTGAACTTGTTTATTAGCTTTCACACTTTTTTGTTTGCTTGATACGTATTCTTTGGAATTTTCTAAGTATGAGATCATGTCACCTG	ATTATTTTTAAACGATTTTATTTATTTATTCATGAAAGACACAGAGAGAGACAGAGACATAGGCAGAGGGAGAAGTAGGCTCTTCACAGGGAACCTGATGTGGTACTCAATCCCAGAACTCTGGAGCCATGCCAAGCCAAAGGCAGATGCTCAACCACTAAGCCACTTAGGTTTCCCTAGAATTATTTTCTTTTTTTTTTTTTTTTTTTTAA
HINT1	11:19551057-19555390	HINT1L4	15:11413333-11413344	TAATCAAACATGGTAGCATTTAATAGGTAAATTACCATAATAATGCCATCAAAACCAACAGCTATAGTGTCATTGGAGAGTTAAATGATATATGTTTATTAGAAAGTGGCTAAATAAGAGGCAATAAATTTTAAAGTAAGAAAATAGCTCCTCCCGAGCTTCTCCCCGGGGCGGCCGCGCGGGAGGAGGCCGCGATGGCCGATGAGATCGCCAAGGCTCAGGCCGCCCGGCCTGGAGGTGACACGATCTTCGGGAAGATCATCCGCAAGGAAATCCCAGCCAAAAT	AAAAAAAAAAAAAAGAAAATAGAGACTCTTAATATTTTTTAGCAAATAGAGACAAAAAAAATGCAATTTAACTGGCACTCATCTACTCTTATAGTTACTGTTACGTACTTAATGTCTACAAGATAAAATAAGCAGGAAAAGGG
HINT1	11:19551057-19555390	HINT1L5	22:133810-133828	NA	NA
HINT1	11:19551057-19555390	HINT1L6	37:20812366-20812444	NA	NA
HIPK3	18:34305208-34397593	HIPK3L1	33:18138457-18138471	NA	NA
HMG20A	30:38839520-38916952	HMG20AL1	32:784297-784336	NA	NA
HMG20A	30:38839520-38916952	HMG20AL2	X:6170631-6170645	TCAGGGCCTTCTGTTGTATTTGAAGCCTCATTCTGAAGCAACTGACTTTGGGAGAGATCCTCCACAAAATCTGGATTGTTGGTGGATGATGTGGCTCCACTGCTATATGGAACATCTGGGTGGGTTAACCCAGTTGCAGCCAGATCATTACTCTCCTTGGAGCCATCTTCATCTGCAAAAAGGGGTGGCAGGGTGGAGCTAGTCATCAAGGTTTCCATCTCTCTTGAGAAAAACGAAGGGATTATTTTGTTCCAATGCGGCGGGGGACTACCGGATTAAAATTTCTAAGAAGGGCGGATCCCTGGGTGGCTCAGCAGTTTAGTGCCTGCCTTCGGCCCAGGGCTTGACCCTGGAGTCCTGGGATCGATTCCCACATTGGGCTCCCTGCATGGAATCTGT…	AAAAAAAAAAAAGAAATTTTAATCCTACTTTCCCTCTCTGTTTCCACCATCTCTCTGGTGCTTCTCTTTTGTGTAATTTGCCCATTTCATTCTGGCTGTTGCAATGGAAGCCACAGCCCATTCCTAACCAGTAGCAAAAATC
HMGB1	25:9431223-9558165	HMGB1L1	1:9693280-9693298	NA	NA
HMGB1	25:9431223-9558165	HMGB1L2	5:42759676-42759691	NA	NA
HMGB1	25:9431223-9558165	HMGB1L3	13:17949810-17949824	NA	NA
HMGB1	25:9431223-9558165	HMGB1L4	15:23736519-23736534	NA	NA
HMGB1	25:9431223-9558165	HMGB1L5	21:34871459-34871478	CATCTTGTTTTTCTCATTTAACAATACCATAAAGAAATCCTTTCAAATCAGAATGGGTTCAATTTTATAAAAAATGTCAGTGAGGGATGTTACAGAGCGGAGAGAGTGAGGAGGCTGCGTCTGGCTCCCG	ACCTGGATGATACTAATAAACTAATAATTGCAGAGGTTTTAAAAAAAAAAAAAAAAAAATGTCAGTGAGGGACACCTGAGTGGCCCAGTCAGTTAAGCATCTGACTCTTGATTTTGGCTCAAGTTACAATCTCTGGATCCTGGGATCC
HMGB1	25:9431223-9558165	HMGB1L6	26:4719250-4719268	NA	NA
HMGB1	25:9431223-9558165	HMGB1L7	29:26763184-26763202	NA	NA
HMGB2	25:23939024-23941720	HMGB2L1	12:7622165-7622177	TTTTCCTCAGAGTCCCGCGGAGAGGCCGGAGCCAGCAGAGACGCTTCCTTCCCAGGGCTCCGGCGTGAACTGGTTTATCGCTAACGCAATCCTCTGCCTCTTGTTTTGCCTGCTCAGTTCTACCAGTGGTTTTTTTCTAGCACTCTTAAGTGTTCTGAAAATGTCCTAATCAAGAATTTGTCAAGGAGCGCCTGAGTGGCTCAATTGGTTGAATGCCTGACTCTTGGTTTCGGCTCAGGTTATGATCTCAGGCTCCTGGGATCAAACCTGGATTTATCACTCCC	AAAAAAAAAAAAAAAAAAAAAAAAAAAAAAGAACTGAGCAGATTTCCTAACATGTTAATGTTAATATCGGTGCTTTATAAAACCACATTTTATTATTCATGATTTACTTACTTTAACTGATTCTGAATCCTATTTATAGTCTTTTGGAAGAACAAATAAAATATGGCATAATTTTAAGTTCTGTTTTTTTTTTTCCTAATTT
HMGB3	X:119152166-119159803	HMGB3L1	2:57573112-57573127	GGATCACCTTTAGCCATCCTGACTGTATTGTTCGCTAGTCTGGGCAGCGCAGGGCCGGTGTCCAAGAATTTATTTCCCTGCTGGGGCTCCATTTTATTTGGAAAGTATCAGTCCATTTTTCATATGTCTTCAGGAAAAT	CTTGGGCTGGAGACAGGCCCTAAACCACTGAGCCCCCCAGAGATCCATATAACCTACCTTTAAATATTAAAGAGGTTTCCAAGAATTTTTTTTTTTTTTTTTAAATGTAATACTGTTTAACTTCAAAAACATTTCAGCATTCTA
HMGB3	X:119152166-119159803	HMGB3L2	13:20451448-20451462	NA	NA
HMGN1	31:34275400-34282427	HMGN1L1	5:31914625-31914643	GCGAAGCTGGGCTGCCTGGGCCGCTGACGCTCCTCCTGTCCCAGATCTTTGAAGCCCTTCTGCAACATGTCAAGAGTTTTATAGCATCTGAACTTCCTTTGCGTCATTGGACGGATCTGATGACGTGTCATCCAACAGAACCAAGTGTGAGAATCTCACCCACAGGTGCAAATGCAGAATCTCTGTTAAGTCCACACA	AGGTCCTCCCAGGGGATGTAGTGTGAGTTCGGGCGGGTGGGACATTTGTGATGGAACTAACCCAGCATTTTTCTGTCCCAGATCTTTGTTTTTTTTTTTTTTTTTTTTTTTTTTTTTTTTTTTTTTTTTTTTTTTT
HMGN1	31:34275400-34282427	HMGN1L2	8:29164118-29164139	GGAGGACCATTTTCTATCCCTGGTCGGTCTCAACAGGTAGAGCCCTGTGGTTCTCCCTACCTGCTGGCACCATCCCAGAGCTATTAAAATTCTTTCAAGGTGTGGCTGAGGGTGGGGTAGAGGATGCTTAGCCACCTACAAGCCCCAGTCGACTGTTAGTTCTAAGTTGCATACAAAAATACACAAATGCAGAGCAGCTCGGGCGGCGGGAGGAGCGTCAGCGGCCCAGGCAGCCCAGCTTCGCGGAGGCTCTCGGCGCGCGGCGGCCCGCAGGCACC	AAAAAAAAAAAAAAAAAAAAAAAACAAAAAAAAAAAAAACAAAAATACACAAATGCAAAGAGCTGGAGCGGCCGGAGAACGTTTCTGAGTCAAACTGGCTGTGCTGCGCCCCGCAAACACGGAGCGTCGGGGGGCGTATCTGACCCGCTTCTGCTTGGAGCCTCCGAACGGGTTAAAAGCGCAAGCGAACTCTTGGGAGTCCGGTAGGAGTTGCTGGTTGTGCCGGACATT
HMGN1	31:34275400-34282427	HMGN1L3	20:19157487-19157504	CCATATAGTTGCCTTGGCTCTTGTGAGGACTCAAATAAATGATAAAGGATGTAGCTATAAATATTAGAATTTGGTGTAAAAATAGAATGGTCTATATGTTGGGCATAAACAGTGAATTTGGCTTAAGAAACAAGTCTGAGGGCCCCCGCCGCGGGTCGCAGCAGCTCGGGCGGCGGGAGGAGCGTCA	ACAAAGTGATAGAAGTAGGAATTCAAACCCAGGTCTTGTGTTCTCCTGACTCAACCCAGAGCTCTTTACACAAAATGAAGACCTCAGACTTGTTTCTTTTTTTTTTTTTTTTTTTTTTTTTTTTTTTTA
HMGN3	12:40135984-40168281	HMGN3L1	17:34499685-34499701	CTGCAGACGCCGCCGCTGGATGCCGCCGCTGCAGCTGCTCACGCGCAGGGCACCTCCACATTGCTTTTATGATAACCCTCTCGGCACATGGAATTTTGTACCCTTTATTTTTGCTGCTGCTGCTGACTCCACATGTTGAGGTCTTTACTTTCTGGCTGGTTCTTCATATATTGTTAGGCCTGTTTGACTTGCTCTATCCATATTCCCATTGTAGAATGGTCAATGAGGCCAGTGGGACCAGGCATACACACCTAG	CCAGGGGTTTAAAAAGGTCATTCCTGGTCTCAGAGCAGATTCTTTCCTAGGTGTCTTTCCTTGTTTACATTCTTTCTGTTAGCTTCTGTTTTTTTTATTTTCCACATTGCTTTTATTTTTTTTTTTTTTTTTTTTTTTTTTTTTTTTTTTTTTTGTGAGTAACAAC
HMGN3	12:40135984-40168281	HMGN3L2	21:14076782-14076838	NA	NA
HMMR	4:47743576-47786982	HMMRL1	11:44066166-44066183	ACAAACCGAAGGTCACTAGCTCTCCTCCGCAACTCCTGGCTGCTTATTTCGGCCTAATCGCTCCCAGTTTATTTATTTTTAATTTTTAAAAATATTTTATTTATTTATTTGAGAGAGCATGAGCATGAGCAGAGATGAGGAGACAGAGGAGTTAGAGGGAGAGGGAGAAGCAGACTCCCCACTGAGCTGGG	AAAGAAAGAAAAAAAAATAGACAGGATTTTAAAAATCCAGATATATGCTTTTTATAAAAGCCATCTCTAAAATATAAAAATGTTTTAATTCACCAGGAGAATAAAATACAGTTGGTCTCTGAACACCAGTTTATTTATTTTTTTTTTTTTTTTTTTTTTTTTTTTTTTTTTT
HNRNPA3	36:20974541-20983972	HNRNPA3L1	12:59663316-59663332	GGCTTAGGTCCAAATAATGAGAAATAGTTAGCCATGCAAAGATTTATCAGAACATCTAGGCAGAAGGAAGAAGTGCAAAACTCCCTGAAATGGAAACAGGCAAGTTGAGTCTATCAGTGTGCTAAATAATTTGGAGTAAGAGGGAAAGTGATAGAAGAACAGAGATGCGGTCATGAAATGTAGGTCTTTGAAGGACATGTAAATTTGAATTTCGATCGAAATGCAGTGAAGTTCCTCTCGGTCCCATATTGAACTCGAGTTGGAAGAGGCGAG	AAAAAAAAAAAAACAAAAACAAACAAACAAACAAACAAACAAACAAAAAAAACAAAATGCAGTGAAAGCCCTGGAGGGGTTTCACAAATGAGTATTAGACTTAACTGGTCATTGGTTGTTAGGACATTTTATGTCTGTGTCTTTTTATAATAGAACAATATTACTTCAGAAGGAATAGAAAAATCTGTATTGACAGTGTACATATGTTTCAAGTGGTGACAAACCAGGGAAACGTACGTTTGGTAAATGTATCAAATTGTATGAAAAATAAAACCATTGACA
HNRNPA3	36:20974541-20983972	HNRNPA3L2	19:28472533-28472549	TGACCTCTGGGTGATTTGGCCCTTAGAAGGTTTTGTTTGACTCAAATTGCATTGCAAAAGTTTTTTGAATTTGCCATATTTGAAATTCAGGAGGCATAGCATAATGAGAGCATTTGGGGGTGTAAAATTTCCGATTCCTTTTTTGCGGCTTCTAGCTCAGTTTAATTGCAGTATCCTGGTCCGGTCTCAAAATGGAGGTAAAACCGCCGCCCGGTCGCCCCCAGCCCGACTC	CATTTTGACTTGAGTGTAGCGTATCAAGAAAATCCTAATTCACACATGTAATAAAAAACTACCATTTACGATCACTAAGCTGATAGACTTAAACTTTCAGGATACTGCAATTATTTTTTTTTTTTTTTTTTTTTTTTTTTTTTTTTTTTTTTTTTTTTTTTTTTTTTT
HNRNPA3	36:20974541-20983972	HNRNPA3L3	24:22547731-22547761	NA	NA
HNRNPA3	36:20974541-20983972	HNRNPA3L4	28:8197292-8197307	ACCTCCATTTTGAGACCGGACTCGCCTCTTCCAACTCGAGTTCAATATCACATTCTTAGTTTAATAAAAGATATTTGTAAGACACAGTTAACATAATATTAAATTGTGATGTATTAAATACTCTCCCTCAAAGACTGAGAACAAGGCAAAGATGTATGGTCTTTATACTTATATTGGTATCATAATTGGAGATCCTAGCCAGTGCAATAGGCAAGAATAAAAGGTAT	TACCAGGAATAAAAAATTAAGGAATTTTTAACTTTTCAATAAAAAAAAAAAATAAATAAACTAAGAATGTTTCCTTGCATCCTTCATTTGCTAGAAGTTTTTATTACAAATGAGTTTTTGCTTTTCCTCCACTTATTAAGATGACTGTATGAGTTATCTCCTTGGTAAACTATACTGATTGATCTTCAAATAATGAAACAATCTCACAAATTCATGTAAAATGTAAAGGACCTAGAGTAG
HNRNPA3	36:20974541-20983972	HNRNPA3L5	30:10269351-10269365	ACTTTAGCCCCCACATGGGTTTTCTCTAGCAGTTGCCTCTAGAATACAGATGGGAAAGCAGTAGGTGTTTAGAAACTTAACTGATTTGGAGGATTGTAGTAGGGTAAAACAAACAAGGGTTCTAGTCCCAAGTCTATCACCATTATAGCAAACAAAAAGCAATTATTTAACCTATCCAAGCTTGTTTCCTCCTTGGTAAAGTAGATGATAAGATCTATTTCCCGCTCAAAATGGAGGTAAAACCGCCGCCCGGTCGCCCCCAGCCCGACTCCGGCCGTCGTCGCCGCCGCCGGGGGGAGGAGGGCCATGATCCAAAGGAACCCGAGCAGTTGAGAAAACTGTTTATTGGTGGTTTGAGCTTTGAAACTACGGATGATAGTTTAAGAGAACATTTTGAAA…	AAAAAAAAAAAAAAAAAAAAAAAAAAAAAAAAAAAAAAAAAAAAAAAAAAAAAAAAAAAAAAAAAAAAAAAAAAAAAAAAAAAAAAAGATCTATTTCCCATCTGCCTCACAAGATTGTTTTGAGGAGCCACTAAGAGGACTCTTGTGGAAATGGTCTATAAATGGTCTAGAAAGCAGGACTAGTTAATTTTCCCAGACCAAGATCCCAAGAGATACTACCCTGCACTGCTTCC
HNRNPA3	36:20974541-20983972	HNRNPA3L6	30:23930947-23930968	CAACTGCTCGGGTTCCTTTGGATCATGGCCCTCCTCCCCCCGGCGGCGGCGGCGACGGCCGGAGGCGGGCTGGGGGCGACCGGGCGGCGGTTTTACCTCCATTTTGAGACCGGACTCGCCTCTTCCAACTCGAGTTCAATATCTATTTTCACTTATATTCTTGATGGCCTCATCAAAATTATTGCTTCAGCTATCACAAGTTACTCCCTGTCATCTGTCATCAGCCCTGACCTCTCCTGAGCTCCAAACACCTATATCCAACCGCTTACTGAAATTCCCACTTTGGGTAAATGCTAGGCAAATC	AAAAAAAAAAAAAAAAAAAAAAAAAAAAAAGAATATAAGTGAAAATAAAAGAATATAAGTGAAAGGAGAAAAATATCTGAGGAAAGCTGATATTTAAAGAGTTGAAAAATGAGGATAAGTTCCACGAGGTTAAGGATGGGCCAGAGCAAAGAGAGAGAAACCCAAAGAAATAGGTAATAGGCCAAGTGAGAAAAATAGTTTCAGTGATGAAGTG
HNRNPA3	36:20974541-20983972	HNRNPA3L7	32:15406930-15406946	AGTTTTCTCAACTGCTCGGGTTCCTTTGGATCATGGCCCTCCTCCCCCCGGCGGCGGCGGCGACGGCCGGAGTCGGGCTGGGGGCGACCGGGCGGCGGTTTTACCTCCATTTTGAGACCGGACTCGCCTCTTCCAACTCGAGTTCAATATCCTAACAATTTTAAAATAGATTTGTATACATAACAATTTTATAGCATACTAATGAATAACATGATGTTGATAATTTAGAAAGTTTGGCATTTTAGAAAGAAACTCTAAACTAGGTATTTAGTAAAATCCTTATCTATAGAAGTAATTTCTTTTTTTTTTTTAAAGATTATATTTATTCATAG	GATTAAATTGGGAAATATTAGTAAGCAATATGAAAAAACTAGGCTTTGTGATAAATGATCATAAGGAATGTGACATACTGCATCTCTATTTGGAGGTTCACAATATGCATTGGCATTTATCCTAAGTAGCATCATAAATAACAGAAACTGACCCTTTATTCTATTTATCCTAACAATTTTATTTTATTTTTTTTTTTTTGTTACAATTTAGCTCAATTTTAATAAAATGTTTCC
HNRNPA3	36:20974541-20983972	HNRNPA3L8	32:32371373-32371391	CTCTAGAAACAGCTCTCTTTGGTTCCACTACACGCCCATCAACCTTGTGTGGTCGGGCACACATTGCTGCATCCACCTCTTCAACACAAGAGTAAGTCACAAAACCAAAACCCCTGGAACGTTTTGTTTGGGGGTCTCTCATTACCACACAATCTGTAAGTGTGCCCCATTTTTCAAAATGTTCTCTTAAACTATCATCCGTAGTTTCAAAGCTCAAACCACCAATAAACAGTTTTCTCAACTGCTCGGGTTCCTTTGGATCATGGCCCTCCATTTTGAGACCAGACTCGCCTCTTCCAACTCGAGTTCAATATGGGCAAAAGACAAACATTTTTTAAAGAACTCAGAACTATGCTCAATTCAAAACTACTTTGGATTTCTTACATCCTCAGTCATATA…	CTTTCAAAGGTAGTAGCTCCACCTCATTGATAGATGATGGTCCAAAGAAAGCACTACACGCAATAAAAGTATCCAATTCAAAGTCCAATGTTTTTGAAACCACCCAAAGATCATCTGAAAAGACAAACATTTTTTTTTTTTTGAAAAGTTAAAAATTCCTTAATTTTTTATTCCTGGTATTGGCTATTTACACTATTTACAGGCCAACATACCTGCTT
HNRNPC	15:18239810-18299065	HNRNPCL1	9:42240483-42240498	CATTATTTCTTTACCTAGGCGCTTGTCTAAGATCAAAATTTTCACCAGATCCTCTCCCCTAGTATCTTCTTCAGCACATGCTCACTGTTCTCCCCATCCTTATCCTTCCCATGTTCATTAATTCATATTGCCCTGCGCCTAGTCCCATTTTCACTTCCTTTGACGCTTCTAGTAGTTATGTTAAGTCTTACCCTGTAATTTTTGCTTTTAATTTTGATACCTCTTTATGACTTAACAATAAAAAGGATGTGTGGTTTTTACCAAAAAATAAATAAATAAATAAATTTTCAGTTGAACTTTTAATTTTGAGATGATCGTGGATTCACGTGCAGTTGTAAGAAACAACAATACAGAAAGATCCCACGTACCCTCTACTGGTTTCACCCCATGGTAACATAT…	AGAGGGAGAAGCAGGCTCCATGCAGGAAGCCCGACGCGGGACTCGATCCCAGGACCCCAGGATCAGGTCCTGAACCGAAGGCAGTTGCTCAACCGCTGAGCCACCCAGGCGTCCCATCATTTAAATTTTCAATTGAGGTGAAGAGACGAAGGCTGAGCAGTCGCGGCCGCGCCCTCGAGCAGCGCTGTGGCTTCTCCACGCAGCACCCGGGAGTGGGAGATTCAGGGATTCGATTCTGAATCTCCCACTCCCGGGT
HNRNPC	15:18239810-18299065	HNRNPCL2	14:1647964-1647978	GCTCGAGGGCGACGACGCGGCCGCGACCGCTCAGCCTTCGTCTCTTCACCTAAAATACATTTTCATATGGATTACCTAACTTTTAGAACCAAAGAAGCAGAATATTTTTTCAGAAAATGATTTTATTAGTTTTTAAAGTTTTTGTTTAAATTCCAGTCAGTCAGAGATGGGGCAAGATGGTGAAAGAGAAGCGTCCCCAAGGCATCTGTCACCACCAACTTACCAAGATAACTTTCAAATCA	GTCAAATAAACAAGTCCTTATTAAACCAGGAATTTGGAGAAAAAAAAAAGAAAATGTATTTTACTTTGTTTCATTTATTAAAGTTATTTATCATTTTTGTTTCTCCTCAAGACAAAACTACATTCACTTCCTTGTTTGTCCAGCTATAGATAAAAGGATTCAACATAGGGTTTATGACCAAAGAGAACCAGATTAGTTTGTCTCACTCTGCTGAATACAAAGATTTG
HNRNPC	15:18239810-18299065	HNRNPCL3	26:9611082-9611098	NA	NA
HNRNPC	15:18239810-18299065	HNRNPCL4	27:33774511-33774522	NA	NA
HNRNPDL	32:6401266-6408006	HNRNPDLL1	3:24402384-24402549	NA	NA
HNRNPDL	32:6401266-6408006	HNRNPDLL2	9:10225734-10225752	NA	NA
HNRNPDL	32:6401266-6408006	HNRNPDLL3	14:5907201-5907215	GTCGCGGCAGCAGCGGCGGCGGAGCGTTGTATGGAGCTGGATTTAAAATGGCGGCGGAAGAGAGCTAGTAGTTGTTTTAAACCATTACATTTCAAAGTGGTTTGTTATGAAGCAATAGGTAACCGATAGGGGTGACCAATTCCTTTCTTTTATTTCCTCCTCCTGTTGCCAGGAGTTCAGAGTCAAATCTGAAGGCTAATCACAGAATCTGTGTTT	AAAAAAAAAAAAAAAAAAAAAAAAAAAAAATAAAACAACTACTATGTACCATTTCTTATGAGACCGTGAGTTGGTTGAGTGTTTTTACTAATCCAGGTTGGGGCCAGCTGATCTTGGTGGGCTTGCTCATGCTCTTGTGAGCTAACATTGTATGTTAGCCCTGGGATGGCTGGTCAGGGATGGCCTCAGCCAGGACGGTTCATCTCTACTCCACGTGATCGCTCATT
HNRNPDL	32:6401266-6408006	HNRNPDLL4	19:42873975-42873985	NA	NA
HNRNPDL	32:6401266-6408006	HNRNPDLL5	24:32809486-32809503	GCAGAGGAGGAGATACAGCACATGGAATTTAAGCATCATGCCCGAGGTCATGGATACTGAGTGATGGAACCAGAATGTGGATCTCTCAAACTCCTGACTTTCTAAATGTTCAGTAAATGGCAGCAATAATCATTATTACTATGAGGTCATGGATTCTTAACTGCAGTTCAAAGAACCTCCTGGATACTGTCTTTTATCCTTAAGGTAAGGCACCCCTGGGGTTGCAGGAATGGTTTATAATACTCTGCAGTATTGCTCTTCCGCCGCCATTTTAAATCCAGCTCCATACAACGCTCCGCCGCCGCTGCTGCCGCGACCCGGACTGCGCGCCAGCACCCCCCGGCCGACAACTCCGCCGCCATGGAGGACATGAACGAGTACAGCAACATAGAGGAATTC…	CAGTGAATGCAAGAATGCAGGACTTTCAGCCCCTTTGAAGTGAGGGTCAATGGGGTAGGGTGGAGTGGAGGGAAGAGTCACAGGATCTAGTGTGTATGAGAGAGACTGTAGGAATCTGGGAAGTCTAGGAGCCCTTCCTCTCACCCCACAACAGAAACAGCCCCCTTTCTCAGGATATTATCCCTAGCAAGTCCTGATTCTTTCAAATGCAATATAATACTGCAGAGTATTTTTTTTTTTTTCACATAAGGAAGCATTTATTTGAGGTTTAACATGAAATCATACAAATAAAATTTGTATAAACACAAATCCACATCGAGTCGTAACACAGATAGCAAAAGACAAAGTAAAAACAAAGGAAACTAAATGGCGGCTATATACAGTTGGACACGGTTGTGT…
HNRNPDL	32:6401266-6408006	HNRNPDLL6	29:29350978-29350998	CCGTCATCCTGCTGATTCTTGCTCGCGTTGATCTTGGATCCCTCTGCGAACTCCTCTATGTTGCTGTACTCGTTCATGTCCTCCATGGCGGCGGAGTTGTCGGCCGGGGGGTGCTGGCGCGCAGTCCGGGTCGCGGCAGCAGCGGCGGCGGAGCGTTGTATGGAGCTGGATTTAAAATGGCGGCGGAAGAGCAAACTCTGTAGATTTAAAATAAGAATCTGATTTAGCAGGAAGGGCTGCATAAAAACTGTACCAGAAAAGAAGAAAGAAGAAAATATTTCTTGTGGCCTCCATGATTTTATATTAGTTGCAGTGCATATTAATATTAAAGATTAACATAAACCAAAGAGAGAGAACATCAGTGAATGCTCATTAGAGAGATAAAACAGCATATCTAAA…	AAAATTAAGAAAAGGGGACAAGTTGACATGAAAATTATCCTTTCCCAAAGCAAAAAAGGAATAAAGGCTTTTTAAACAAAAAAAAAAAAAAAAAAATCTACAGAGTTTGTTCTCTTCAATGCAGGGCCTCTGTGACAGCTGTTCTGAGACCCTAACAAGTGAATTCATTTAGAGGCAGCTACTTCTCAGTAACAAGTTGCCTGAGGTTGCCAATGGTCTAAAATGTAACTCTTACTCACTTGGACTGGCCTGAAACTTTTACCATTAAACTAAGCTTGAGGGCTTCAGGAAATCATAGATTGGTTGAGTACTGTGCAATAATTCACTCAGGGAGGTAG
HNRNPDL	32:6401266-6408006	HNRNPDLL7	30:28794558-28794576	AGAATAGAATAACATGAATTCAAGTGGTCTTCAATGATATTTTAACTTCACTGGGAATATGGTTATAGTTACATTATACCACTCAGAGGCAGGATAATAAGCTTCTATTTGAATCCTATAAATATATATGATCAGCTTTTAAACTTCATATTTCATACAACGCTCCGCCGCCGCTGCTGCCGCGACCCG	AAAAAAAAAAAAAAAAGATATTAAAATTGTCACAAAACCTTAACTCCTCACTTTGACCCCTGCTAATTAATGGACTTCACTTACCTTTACTGAAAATAATGAAATATGAAGTTTATTTTTATTTTTTATTTTTTTTTTTTTTTTGTTTAAAAAGCCTTTATTCATTTTTT
HNRNPDL	32:6401266-6408006	HNRNPDLL8	36:3300679-3300696	TCCACCTGGGTTCTTAAGCCTATTTTCTGTCTCCTCTAGGCCTTCCCTTTTATCTGATAAGGGTTTATCTACTCTCTATCTTCAGTCTTAACATCTTTCTGCCTTATTCTTGAAAAACATTCAGGTCTTCTCTATCTTCAAATCAAAAGGCAGTCTCATCAAGTCATTGACTTATCCTTTTTATTCTCTTATTTGTAAGAAAATTTTACAATAAAAGTGTTTATTTAAAAAACATTACTTAGAAATCCAGCTCCATACAACGCTCCGCCGCCGCTGCTGCCGCGACCCGGACTGCGCGCCAGCACCCCCGGCCGACAACTCCGCCGCCATGGAGGACATGAACGAGTACAGCAACATAGAGGAATTCGCAGAGGGATCCAAGATCAACGCGAGCAAGAA…	CAGGAGACAGAGTAATTCTGACACATGAATAAAGGCTTTTTAAACAAAATAAATAAATAAATAAATAAATAAATAAATAAATAAATAAATAAAAAACATTACTTAGGGGCACCTGGGCGGCTCAGTTGGTTAAGCATTTGCTTTCGGCTCAAATCCTAATCCCAGAGTCCTGGGATCAAGTCCCACATCAGGCTCCCCATACTCAG
HNRNPDL	32:6401266-6408006	HNRNPDLL9	36:16696124-16696141	TGCCTCCTTAAGAAAAAGGGAAGGATGTACCACTATCTTACTGAGGGGAAAAGAAACATTCAGTTTGCAGCGTGGGTAAATGGTGTGGTATTTAAAAGAAATCATACACAGTTTTATGTCACATTTCTATAGCATTGCCCACAGAATGCAAAAATTCCTTTGTTTTCTGTGCAAAGAAACCAAGAACAAGCTCTTCCGCCGCCATTTTAAATCCAGCTCCATACAACGCTCCGCCG	TTAAGTTAAAACCAAAAAAAAGTGTTTCTTTAGAAAAAAAAAAAAAAAAAAAAAAAAAGAAACCAAGAACAAGAGAAATTTGATTCCATTCAGTTCATAGAGTTTTCTTTTTTACAAAATTTATATTCAATTTTTTTTTAATTTATATTCAATTTAATGAACATAGAGTGTACCGTTAGTTTCAGAGGTAGAGGTCAGTGATTCATCAGTTGCATATAACACCCAGTGTCCGTCACAT
HNRNPH1	11:2050753-2059363	HNRNPH1L1	35:7450672-7450672	NA	NA
HNRNPK	1:75499334-75511428	HNRNPKL1	4:23723485-23723500	AACAGAGGATAATGGCGTCCGCAGTGCTTTCGCCTGGAGCGCCCTCCATGTAAGTTACTTATAATTCTTTCTCCAGTAGTAAAAATGTGGTAAGTTATGATACATCAATTTGCTGAAATGTTGTGGAGCTCTTTAAAATTATGCTTATAAAGACCTTTTAATGTCATGGGGAAAAGTAAGATTATAATGAGAAAAAATTAGGGACAGAACACAAATTTTTATATA	AACACTGGGAATTCAAGAATAGGTTTTGGTGGGAGATGTGAGTTTGGTTTTAAACTGTTGAGAAGTTTTCCTTGTTTGAGGAATGGGAGTCTCTTTTGCAACACTATTTAAAATGCTGGCCATGTAAGTTACTTTTTTTTTTTTTTTTTTTTTTTTTTTTTTTTTTTGGTTTCATTTATTTTTTTT
HNRNPK	1:75499334-75511428	HNRNPKL2	18:36815998-36815998	CATTTTCGTGTATCAAATGGACACACCAATCTATAGGCCGCAAAGAAGCGGGACGTAGGCGAGACGTCGAGGTTGCAGCAGCTGAGAAACAGAGGATAATGGCGTCCGCAGTGCTTTCGCCTGGAGCGCCCTCCTCCTTTCTCGTTCGCGCACTCCTTTTATGTGTATTTGTAATGTAATTCTCTTTTGATACTTAAAGTGGGAATATCGTCCTTTCAAGCTACAGTATTGGGTAATTATAAGAAGATTCAACACAGTCTTGAGAATTTCTTTACTTTTTCACCCTCCCTTGTGCCGAATGACCTTGCCATAGATTAAAATTATTCCACCTGTTAGGTG	GAATCAAAAAAAAATACATTTCCAATACACATAAAATTATTATGAATAGGCAACCTTTGCTCGACACCATACTTCCAGACTATGTAATATGAATAATAATTTTATG
HNRNPM	20:52993934-53034608	HNRNPML1	11:40007891-40007904	TTGGAAGAATGGCGGAACAACGTGGACTGATTCTTTTTATGAGCATTTTAGCACCATCTTACTATAAATGTCTTATGAAAAAAAATATTTAACAACAAGACTATGTAGAACAACAACTAGTAGAACTAATGAAGAAAAAAAATTGAGACGCGGAGAAAATGGCGGCAGGGGTCGAAGCGGCGGCCGAGG	CAAAAAAAAAAAAAAAAAAAAAAAAAAAAAAAAAAGAAAAAAAATTAACCAGAATTGATTTGAACACTAAGGCTAAAACTGGAAGCAACAAGGTCCAAAATTTAACATTTATCAGTCAATGGGTAGGAAGATAAAAGAACATTACAGGAGTGGAAAAGAAATGGCACTTGAGAATAGCAACAGGCATCTTTCATTCAAT
HNRNPR	2:76073553-76108763	HNRNPRL1	22:45224122-45224138	GTATGTAGCTTAGCATTAGAAATTGCTGGAGAGACATGTATTGAATGCAGCTCATTTGTGGCAACAAGCAGGACTGAATCTGCTTTTACCATTCTCTGCTCAGTGTGCCTTGAGGCAGGAGCAGTAGGAGGAAGCATATGTCACCTTAAAACAAACCCAGGCCCTCTGTCCATGAGGGGGGGAGGGGGTGGCGCGCGCGCCATTTCTAGTCGTTTTCAAAGCGCCTCGCGCTGATTCTCCCGGGCCCGGCCGGCGGCCCCCGCTCTGCCCTGCCTAATCACATGGCTCATCCGGTGAATG	TTTAAATGTTTTTTTTTTTAAATAAACTCTTTGTAGTTTTTTTGTACCTCCTCAGATTTGGTTTAACTTGTTTTTTAATTGTTTAAAATTCAAAACCTTTTTACAATCAGCCTTACAAATTTTTTTTGGTTTAAACACAAAACCCTGGAAAATTTGTTCTTGAATTGAATTATATTCCCAATTTTTTTTTAATTAAAAATTTAAAAAAAACAAAAAAATCTATTAAAAAAAAAAAAAAAAAAAAACAAAAAAAAAAACAAACCCAGGCCAGCACCAGAGGACCCCATTCCTCCCCATTTCTGCCCCAGCTTCCACTTGGACTCCTGCCAACCCCACTGGGCACCACCGGGCTAACCTTCCTTGCAGGTGTCTCACTTCTCAGACTTTTACTGGCTTTCA…
HNRNPU	7:35832956-35842898	HNRNPUL1	X:61078928-61078939	NA	NA
HOMEZ	8:3545434-3558923	HOMEZL1	1:27238674-27238688	CCTGCTCCAAGCCCACCCGCGCGGAGGGCCGGGACCTCATTGAGCGATAAAGACAGATATTAGAGAAACATCTTGAAAACAAATCAATCAACATGATGATGCCAACCTTGCTTGATTGACTTTT	AAAAGGCCAAAAATAAAATTATTTCTCTATCGCTCAATGAATCTATTTATTCAAGAGTATTCATGAACAAATGACTCAAGAGCATCTTTCAATTGATATTTGTTCTGACATGGTTATTCTATGTCTCTTAAGCAAAAGGCAAACTTTGAGAAGCACTGACTAAGATGAAAGTTCTCCTTTCCACTCTTAGA
HOOK3	16:22791198-22940168	HOOK3L1	4:41393065-41393065	NA	NA
HSBP1	5:68474960-68479206	HSBP1L1	19:37163264-37163275	NA	NA
HSDL2	11:66883021-66944844	HSDL2L1	31:14927769-14927787	NA	NA
HSP90AB1	12:12658415-12664945	HSP90AB1L1	12:29449790-29449806	AAATGATAATAGCATTCAGCAGTATCTTGTCATTGAATAGGTAGCTACCTCCTTCATGGCAAGATTCTGTCTTGTTCATTTCGCATGCACAGCAAACAATATGTCCCACTTTGTTTGCATTCAATAAATGTTTGCTGGCTGTAAGAATAAATGTTGGGGAGTCACCCCCGCGCAGCCTTGGTTCGGCGTCGTAGCCGG	AAAAAAAAAAAAAAAAAAAAAAAAAAAAAAGAATAAATGTTGGAGCAATAGAACTAGTCAGAGTTATGAGAAAAAAAAAAAACCCATGGTTCATATCTGATGAACAGTAAGTTGATTTTGACTGGCAATTGTGAAATATACATTCGAACAGAAATCCAGAAATCTAGGCTGCAGCAATATTGGAGAAAGCTCCAAATGCCAGA
HSP90AB1	12:12658415-12664945	HSP90AB1L2	34:19116686-19116702	NA	NA
HSP90AB1	12:12658415-12664945	HSP90AB1L3	X:72288006-72288024	AATTCAGGGCATTGCTGTTCATCCCTCGTCGGGCTCCTTTTGAATTGTAAATTGTTCTCCAAACTTTTATTTTCAGGTTGTAGGTGTCCTTCTGTCTCACATGAGTCTCTTGTAGACAGCAAATAGATGGGTCCTGCTTTTTTATCCAGTCTGAAACCCTGCACCTTTTGATGGGGTCATTAAGCGCGTTCATGTTCAGGGTTACTATTGACAGAT	ATAATAAAAAAAAAAAATGCTATGTTTTTAAAAAAAAAAAAAAAAAAAAAAAAAAAATTTACAATTCAAATGGTCCTCAAAAGAAAGCAGGGGTAGCCATCCTTATATCAGATAAACTAAAATTTACCCTGAAGACTGTAGTGAGAGATAAAGAGGGACACTATCTCATACTTAAAGGATCTATCC
HSPD1	37:7010421-7025912	HSPD1L1	3:76974780-76974789	CTACACCTTGAAGCATTAAGGCTCGGGCATCGGCACCGAATTTTACATCCTTGGCATAGGCCCGAGTGAGATGAGGAGCCAGGGCTCTGGACACTGGCCTGACGTGGCGGAGCACTGCGGGTAATCGAAGCATTTCTGCGGGTCGGCGGCGGAGCGTGCGGGCGGCGAGGCAGGCCGGCGGCGGCGACTATGCATTTAAATATTAATATTAAATTAGAAACAATCCATTCCGTGCTAAAGAACGAATAATACACGACATTTCCACTTTTCTTCAATTCAGTCATGTCCTTTTATTTATGCAAAAGTCTATCAGCTTCAGGTTTTCAAGAAGCTACCAAAATTGTTTCATTTTAAAGAAAT	AAAAAAAACAAAAAAACAAAAAAAAAAAAAAAAAAAAAAAAAAAATAAATGCATGACACAGCAATCTAAATGGATTTTTTATTCCATTATGCCCAGAGTAGTTTCTTTTTGAAAAACAAAACAGCAAAACATTAAATGTAAGTAGTGAAGTATAAAAAAAAAAAGGAATTAGAACAGAAGAAA
HSPD1	37:7010421-7025912	HSPD1L2	19:5797469-5797484	NA	NA
HSPD1	37:7010421-7025912	HSPD1L3	25:49688332-49688343	NA	NA
HSPD1	37:7010421-7025912	HSPD1L4	28:27632304-27632319	NA	NA
HSPH1	25:8972942-8998404	HSPH1L1	37:12483992-12484003	NA	NA
HYPK	30:10541713-10544572	HYPKL1	16:36373719-36373729	NA	NA
HYPK	30:10541713-10544572	HYPKL2	22:45979559-45979574	GCAGGTTATAAACTGCAGGGAGTTTGGTATTGTAACAGGGTAACCAAAGGTCTTTCTTACATTCCTTTTTTTTTGTTTTAAGATTTTATTTATTGGGGATCGATATGGCTACCGAGGGGGATGTGGAGCTGGAGTTGGAG	GTTCTTTGGGTTGGCAGGCCTAAAATCATCAGCTATTTTACATTTAAAAAAAAAAAGATTTTATTTATTTATTCATGAGAGACACAGAGAGAGAGGCAGAGACAAGGCAGAGGAAGAAGCAGGCTCCATGAAGGGAGCCTGACGTGGGACTC
ICA1	14:23673739-23816494	ICA1L1	1:116169484-116169484	NA	NA
IDH1	37:16512027-16530470	IDH1L1	11:20080620-20089067	NA	NA
IDH1	37:16512027-16530470	IDH1L2	12:67608117-67608131	AAGTTATTATCCACAACATTTTATTTAGCAAAGAAAACATATCATTTAAAAAAGGTATGGAGGCTCCCGGGCTGGTGCGGAGGCGGTGTCAGCAG	TTTTTTTTTAATGATTAGACTGGGATTATAGGTTTTGAAAGGAAGACTTAATATACTTAATCATTTACTTATATCACTATTGACTCATGGATATTTATTTTATATTTTGTGTTATAAACCATACCTTTTTTATTTTTTTTTATTTTTTATTTTTTTTTTCATTAGCACTTA
IDH2	3:53070462-53077566	IDH2L1	13:27040972-27040972	NA	NA
IDH3B	24:18556437-18561342	IDH3BL1	16:15831269-15831284	NA	NA
IDI1	2:33927759-33930651	IDI1L1	22:41020205-41020222	AGGCGGAGGATCGCCGCCGCGCCCCCGCCGCCCCGGGCTCCCCGCGCCGCCGGCTGAAGGCAGATCTTAACCAACTGAGACACCTAGACATTCCTAAGTCATATTTTCTATTAGTGCCCATCTCAACTAAATATATGTTATATTAACCTATAAGCTCTGTGAAGGTTGAAACTAAGTGAAAATATTACCATACTATTTTCACTGTATTATTACTAGAATTTAGC	ATAATAAACACTGGGAAGATGAAAAATTATTTAACAGAGCTAAATGTTTTGTGAATTCAGTAGAAAAGCCCATTTCTTAAGCCTGAAGAGTTGCTGAAAACTTCAGGCAAGACGATGTGGCAAGTACTAATTTTACTGAGAAGCAAAACCAATAAAAGGAATTACCACATTTTAAAAAAAAAAAAAAAAAAAAAAAAAAAGATCTGCCTTCAGCTCAGGTCATGATCTCAGGGGTCTGAAATCAAGCCCCATATCAGGCTCCCTGCTAGGTAGAGTCTGTTTCTCTCTCTATCTCTCTTTATGACTCTCCCCATGCTTGTGCTCACATGCTCTCTCTCTCTCTCTCTGAAATAAATAAATAAAACTTTTGATAAAAAAAGAAAATATG
IER3IP1	7:44309459-44326253	IER3IP1L1	27:40321106-40321122	NA	NA
IFRD1	14:52053423-52078419	IFRD1L1	36:14230212-14230228	GTCTTCCCTGACTACCATCTAAAACAGCAGCCTCCATCATTTTTTTGTTCCTTATCTTTGCTTGCTTGCTTGCTTGCTTGCTTGCTTTATTTTTAGTAACACTCATCAGTTTTCTCCACTATAAATAATCTCCATGGGCCTTAGCTCCCGCGCTAGAGAGAAACATGGATCGGTTTTCCGATCACA	AAAAAAAAAAAAAAAAAAAAAAAAAAAAAAAAAAAAAAAAAAAAAAAAAAAAAATAATCTCCATGAAGTCAGGGATTTTCATCTATTTTCTTTAACCACTATATCTCTAGCAATCAGAACTAGCACATAATAGGGCTTAGTGAATATTCA
IGBP1	X:54558515-54612029	IGBP1L1	28:29053405-29053405	TGAAAATGACTTGGGTGAAGAGGAATTCAGAGTTAGACATAAATATGAAGTATCCACAAGAAGAAATCCAAGTTGAAATTTCAATAGAGTTTGACCCCGGAAGTGAGGTCTTCCGCGTTCCTCC	TTGTTATTTCTGCTAACTTCAGATTTTGATGACTTTTATAATGTAATGAAATTTCAATAGACATTTAGAGACCCTGGTCTGAGCCCTTACCAGAATGCATGTTGATTGCTAAAGCTTTCAACAGAATTTTGCAAAAACTAACCATCTTATTCACTAAACTAGGACACCAGTCATCTATTTCCATT
IGF2BP1	9:25199287-25240693	IGF2BP1L1	14:9377012-9377023	NA	NA
IGF2BP2	34:18368509-18522232	IGF2BP2L1	12:41819702-41819702	CCGCCACCCACCTTTTTTTTTATCTAATACTAATTCCTCTCACTGCTTTCCCTCACATTGTAAGAAGAAGAAACCCTTCAAATAATCTCCATTTCACACCTTTCTCCCTTATTCTCACTTGTTAGGTAGAATTTAAAAATATACTTACTAATACTTTATCTGACTCTAAGACATAAGGTTTTCTGATATTTTAA	GGATTTATAATAAAAAATATTTTACTCTTTATATAAAAACAAGATGCCAACTCTTTTTTTTTTTTTTTTTCTTGTTAGCTGGATATATTTCATTTTTTTTGTTTTTGTTTT
IGFBP2	37:23553227-23569321	IGFBP2L1	21:21009297-21009297	NA	NA
IKZF5	28:32547300-32564471	IKZF5L1	2:65226127-65226144	TAAAATAAAATAAAATAAAATAAAATAAAAAAATAAAATAAATAAAATAAAATAATAAAATAAATAAAAAATAAAATAAATAAAATAAAATAAAGAAAGAAAGAAATTGCTTGAACTGGTAAAGCTATAAGAAAGTTTACACCAGACAACAAACATGGCGGCGGCGGCGACGGTGACGAAGGCGGCGGCGGCGGCGGCGGCGGCGGCGGCGACGGCAGCGGCGTTAAACAAGGCAGTGGGAGTTACTCGGTGCGGTGGTCCGGTGGCATAACAAACTAAACTTCAAAAGAAAAAAGAAAAAACAAAACAAAGCAAAGATGGGTGAAAAGAAACCAGAGCCTTTGGACTTCGTGAAAGATTTCCAAGAATATCTGACTCAACAGACTCATCATGTGAACA…	TCTTTTTCTTTTCCTTTGTTGGTTTTCAACTTTTTTTTTCCTGTGGCTTTTTCTTCTGCTCTTCTCGTCAGCTCCTTTCTCTCTTCCATGGTTGCCTTCTCTTTTTTTATCATGAACACTGGTGTAAACTTTCTTTTTTTTTTTTTTTTTTTTTTTTTTTTTTTTTTTTTTTTTTTTTTTTTTTTTTTTT
ILF3	20:50511915-50544234	ILF3L1	27:17021434-17021444	NA	NA
IMMP1L	18:35880278-35963128	IMMP1LL1	3:64459225-64459233	CTCTGCCACCATTGGCCATAGGTCTGTTATACAATACATTCAATTTTTAAGGCAGTTGCAAGGCTTCCAGAAAATATCATCTAAAGCATGTCTGAGAGTATATATGGGTAATCCACGAGTTCAGGATTCCTCTAGCCCCAGAGAGCCCGGGGATACTCTCACCCCGGACTCAGGTGGGCCTTCCTCACCTGGGCCCGGCAGAAGTCCGCCGTCCCCGATCTTTGCTCTTCTGAAGTATGATCAGTTTCTCCCTCTGCTTCTCCTTCTCTACCAGCTCTTTTTCAAAACTAATTTCATACCAGAAAATTCCACTGACCTGGAGTGGTCCACTCCA	AAAAAAAAAAAGAAGAGCAAAGATCACTGATCACTGATGGAGCCCAGACATAGAGGGACCAGGGCCAAGTACCTTCTACACGCTTTGCCAGGTTATCTGCCCAGACCCCCAAATCCCACTGCTATGCTGGGAACTCTATATTTTCTGTGCCAGGCACATTGTCCAGCACATGGTTGTACTCAGTCAATG
IMMT	17:38927508-38964522	IMMTL1	24:20890639-20890653	NA	NA
IMPACT	7:63947117-63976628	IMPACTL1	16:42365265-42365276	TTTTTGCCTAATCTTCATCTTGACATGTTTAAGCATATGTGAATATTTATCAAAGCGTGTTCATGGTGACAAAAAATAAAACTGCAATAATATGAACATTGGCTAAAATATCATCTCATTTGTTTATAAGAATTTAGGCAATAGTTCCTAAGTATTGCATACCTAGGATAATGGTAAGATGGAAATGGAGGAAAAAATTAGCCCCACGCTCCGGACCTGGGCTGGCGGCGGCCGCT	AAAAAAAAAAAAAAAAAAAAAAAAAAAAAATTAGCACTACACTCACTCACCATGTATGATGTCATCATGTTCTAAGTTTAATGTGTATGTATAAATACATATGCATAGATGTATAAAGCTATATATAAAATTCTAAAAAAATAAAAACGTGTAGGCTTCAAATCATTTAAAAAGTCTGATCCCTTTTGAGAAAGCAATTCGGCTTCAAGCAATCTACTGCACAAG
INA	28:15670919-15685080	INAL1	6:48613379-48613392	NA	NA
ING5	25:51535521-51556264	ING5L1	35:10841689-10841706	NA	NA
INIP	11:67137101-67154443	INIPL1	5:63354009-63354023	CCAGGATGATTAGTTGAAGACTGGTTCTGCATTAGTAATTTTCTTTTCTCTTTGTCCAGTTCTGCCAAGATTGCAACTCTGTTTTTGTTTTGAAAACCTTGTCCTGAAGGGTTTGCTGCCATTATCTTCTATTTTGTTTCAACTATGTTCAATGGCAACTGGTCAGCACTTTACAATTACCGGGGCCTCCAGAGCGCCCAGGCCGGTCCGCGCCGTCCGACCGCTCTCTCAAAGGGGGCGCGACCACTTAGAGCCAGTTCAAACTCTTAACACTCATTAAACCTTCTGGTTTATACTCTGAGCCTGTAATAGTCATCTGTACATGTTTCCCAGTCACCCAACGTTATTCATTTTATCCACTCACCCCCTCTCCTCTGGCCATGTAAAAGGATATGTGCA…	AAAAAAAAAAAAAAAAAAAAAAAAGAGTTTGAACTGAAGGTCTCATTCCTGCAGAGAAGAATGTGGGCACATTTGTAGGTTAGGATTAAATTCAAACCCCAAATCCCAACTCTCCCATGAGTTGATCTGCCTGGGAACTCAAATAGTCAGGAAGGTAGCAAGTGAGGGGAATAAAAATCAAGTTCTTAGTT
INIP	11:67137101-67154443	INIPL2	26:10402158-10402164	CCGACCAACCTATTATGACTACTCATCTTAAAACTTTGCACATATCCTTTTACATGGCCAGAGGAGAGGGGGTGAGTGGATAAAATGAATAACGTTGGGTGACTGGGAAACATGTACAGATGACTATTACAGGCTCAGAGTATAAACCAGAAGGTTTAATGAGTGTTAAGAGTTTGAACTGGCTCTAAGTGGTCGCGCCCCCTTTGAGAGAGCGGTCGG	ATGATATTAAAAATAATTATAAGAAATAAAAAAAAAAAAAAAAGAGTTTGAACTGAAGGTCTCATTCCTGCAGAGAAGAATGTGGGCACATTTGTAGGTTAGGATTAAATTCAAACCCCAAATCCCAACT
INTS14	30:29921353-29956473	INTS14L1	26:16943428-16943728	NA	NA
INTS14	30:29921353-29956473	INTS14L2	26:18994965-18994978	NA	NA
INTS2	9:34749898-34801591	INTS2L1	X:66950444-66950461	NA	NA
INTS6	22:549221-636810	INTS6L1	33:30256827-30256844	NA	NA
IQCB1	33:25046975-25112652	IQCB1L1	18:5063113-5063116	ATCTCCAATTAGTATTTCTCAAGCACAAATCCTCTCAAGTGCATTTTTCTGCTCAGCTCCGTAGGAAAAGTCTTTGAAAGAGTTGTGTATACTTAGCATGTCCACTGTCTCTGTCTTCATTTTGTCCCTTGCAGCCATGCCAATCAGGATTCCATTCCAACAACTCAAACAAACAACTTTAGAATCTCAATGATCCCTACAATGCCGTAAGTAAGTGCCGTAAGAAAAAGAAACTATTTGCTCCTTGGCGAGGACTTCAAGATCTCACCGATGCACGGAGAGTTGAATTAAAGCAACAAGTGGATGACTATCTCAGAAGACATCCGAGCTCTCAAATGTCAGATATGACTAGCAGAGAGCTCCATTCCCAAGCTCAAGAACAACTGCAACACTACCTTA…	TTTTAGTGTGGGTTGGGCATTGAGAATTAAAAAAAAAATCCCCAGTTGATTATAACTTGCAGTCAATGGAAAGACCACTGGATAGAGGTAAGGAAAATTAAAGGGGTCCAATAAAGTGAAGCAAGGTGAAATAAAAGAAAAATCAAGGGAGCATGATGTTCTGGAAGTCAAGATAAGAAAGTGACTTGAAAAAGAGGAGGGATTAGTTTTGTCAAATGCTGCCTTTCTTGAGTCCACAAAATAAAAGCTAATTCAACTATTGAATTACATACACAAAAAGGATTTGTGTCATTTCTCTGGATAGCTTCCTAAGGGGGTTTGGTTCCACCAATGAATAAAGTTCCTAATTCTAAACTAAACTCATCCTTTGGAACATCAATCTCATCTCCTGCTTCTTCC…
IRAK2	20:8133987-8197008	IRAK2L1	8:73746772-73746772	NA	NA
ISOC1	11:18011330-18029330	ISOC1L1	23:37414635-37414651	TTTAAGCTGTGGCATCCTAAAGAGATTGCATTTTATGGGGACATTTTCAAAGTATCTTTTAGTTCTTTAAAACATTCTCAGGGAGACGCTCGGGGGAACATGGCGGCGGCGGAGCTGGCGGTCCCGGCGCT	AAAAAAAAAAAAAAAAAAAAAAAAAAAAAATAAAACATTCTCAGGAAAGAAGTGCTCTTGACAAAAGATATTTACTAGCATTTCAGAGATTTATGTCTTCATAACATTTTTTTTTCTTCATAACATTTAAACATCAAAATAACATTCTTTTTTTTTTCAAAATAACATTCTTAAAATAAACATATAAAAATGAATTGTTTCATAGGAAAAAAATCTTAGCAACTTGGG
ISOC2	1:102246881-102253726	ISOC2L1	18:55444813-55444827	CAGGGCACCAACATTCTAGCCGATGGGAAATAATAAACAAGTAAGCTAGTAAAATATCTTAATTTATTGTTACTAAAGAACAAGGAAGAGCTTGCCCAACCAATTTGCCTCCAATGAAGTCATAGGGCTGATTGGGTGCAATATTATATATGTCATATTAAAAAGTGATGAGAGGGGAGGACGTGAGCGGCGTTAAGTGCGGCTCCGTGAGGACATGGCAACTATAAGGTCCAACCTGGGCCGAGTCCTCCCTGGATCATCCATCCTGTTCCTGTGTGACATGCAGGAGAAGTTCCGCCATATCGCATACTTTCCCCAGATTGTCTCTGTGGC	TTGTGGTCCTCAAACAATTTAATCAGAATACCATCTTGATTGTGATTTATCCATTATCACATTTTATTTTATTTTTTCTCATCACTTTTTTTTTTTTTTTTTTTTTTTTTTTTATTTTTTTTTTT
ITCH	24:23476619-23630574	ITCHL1	X:61632036-61632051	AAGGTGTGTACTTTCAAAACTATGAAATACTGATGAGAGAGATCAAAGATGACAGAAACAAATGGAAAGATATTCCATGCTCACGGATTAGAAGAATTAATATTGTGAAAATGTCCATATTACCCAAAGCAATCCACAGATTCAATGCAGTCTCTTTTAAAACACTGATACCGCGGCTGCCATCTTAGTCGAGGGACTGAAGAGTCGCCGCCGCCCCGAGTC	TACTGCATGTTATGTTGAAATAAAAACAAAGTAAAATGAAAAAAATAAAAAATAAAAAATAAAACACTGATACCTTCTTCAAATTTGAATGAAGCTACAGAAGACCCCAAATAACCAAAGTAATCCTGAGAAAGAATAAAGCTGGAGGTATCAACCAGATTTCAAGATATATTATAAAGCAGTAGTAATCAAAACAGTACAGTACTGGCACACACAAAAAAAGACACATAGATCAATAGAACAG
ITSN1	31:29144754-29360134	ITSN1L1	31:6637771-6637787	GATCTAAATGTGAGGCAGAATCCATCATAATCCTAGAGGAAAACATAGGCACACCTTTTTAAAACTTGGCCACAGCAACTTCTTGCAAGATATATCTGTGAAGGCAAGGGAAACAAAAACAAAAATGAGTTATTGAGACTTAATCAAGATAAAAAGCTTCTGCACAGGTAGTACGGCGGCTCGCGAGGGAGAATCCCG	ATTATCTGATAGGTCATTTGCAAATATCTTCTCCCATTCTGTACGTTGTCTTATAGTTTTGTTGACTGTTTCCTTTGTTGTGCAGAAGCTTTTTTTTTTTTTTTTTTTAAAATTTTTTATATGAAGAATTTAATTATCTTTAACCGAAACTA
JPT2	6:39181488-39201903	JPT2L1	34:16785595-16785611	GAATACTTCAATAAAGGACTTGCTGGTTAATTTTAAAGGTGTTAAAATGCTCACACAAGAATTAAAAACATTAAAGGATTAGGGCAGAGCTTCAACTTCACTAATCAGTACACATTATAAGACCTTCAAATATATTCACAGAGGGATCCCTGGGTGGTGCAGCGGTTTGGCGCCTGCCTTTGGCCCAGGGCGCGATCCTGGAGACCCGGG	GTCTCTGCCTCATTCTCTCTCTCTCTGTGACTATCACAAATAAATAAAAATTAAAAAAAAAAATATATTCACAGAGATAGTAGGGGTAACTTTATTGAGGAATGCACAAAAGCAAATTAACCTTGCAGTTTAAGTTACACATTAGTGGTCTCTGCTGTGTTAAATTTGACCGCACACTTGAGTATTTTTTAT
KAT7	9:25841916-25875245	KAT7L1	10:44869757-44869858	NA	NA
KAT7	9:25841916-25875245	KAT7L2	13:49201524-49201539	TAGGTCTGTCTGTGTTCCATGGTACTCATGACAAGTATGCTGGCACCGGAAAGCTCACTATGTATTATTGATTCAATGACAATCATTGGTGATTGAACTCAATCTCCGGCCCCTCTGTCCTCCCAGGAGATAGGGGTG	AAAAAAAAAAAAAAAAATAATACATAGTGATGAAGCCTCCACAAATACCCAGAAGGGTCGGGTTCAGAGAGCTTCTGGATTGGTGGACATGTGGAGATGCTGGGAGAGTGGCCCTTCTGGACAGGGCATGGAAGCTCTATACCCCTTCCCCCATACCTTGCCCTACACATCTCTTCTGTCTGGCT
KAT7	9:25841916-25875245	KAT7L3	17:59355979-59355979	NA	NA
KAT7	9:25841916-25875245	KAT7L4	22:60758702-60758720	GCTTAATTTAGACTCTAATTCACAACCTCCTGAAAATGCCTTGGAATACAACTGCACTTGAAGGGGGCAACTTGCAGTGGAAGCTGGGAATAAGCAAGGCCCCATGCTGCTCCACTTCTGCCCTGCCCCCACCTTGACCCTTCCCCTCCTGAAGCTGGCGCACAGGCCAGGAAACAGCTGCAAGGCACAGCTGGAACAGAAAAGCTGCAGGCTGAGCCCTGCCTAAATCCCAAAGGATCATGAGGTGTAAAAAAACGATGGTTGTTTTCCGGTGCCAGCATACTTGTCATGAGTACCATGGAACACAGACAGACCTATGGGAACACTCGGGAACC	AATGACGTGACATGAGTAAGAAAAAAAAAAAAAAAAAAAAAACGATTGTGCTCTAGATCCACTACACGTTGAGGTACTTGGTGATAAAGTGGGCCTAGGGCACAGCTGGAGAACCTGCAAGCCTGGCAAGCTTTCAGGTGATGCCAATTTGCTGGTCTGCAGACCTTGCTT
KCTD5	6:38403024-38426158	KCTD5L1	33:18420307-18420383	NA	NA
KHDC3L	12:35434123-35435679	KHDC3LL1	15:10332887-10332887	NA	NA
KHDC3L	12:35434123-35435679	KHDC3LL2	15:60953162-60953171	CTGGCTGGCTCAATCGGTAGAGCATGCAACTCTTGATTTCGGCGTTGTGAGTTCAAGCCCCCCATGGGGTGTAAAACTAAACTCTTTAGGGGCACCCTGGTGGCTCAGTCAATTAAGAATCAAACTCTTGATTTCAGGTCATGATCTCAAGGTTGTGAGATGGAGCACTGTATCTGACTCCATGCTGGGCATGGAGCCTGCTTAGGATTCTCTCTGCCTCTCTCCTTCTCCCCCTCTCAATCCCTTTCTAAAAAAAAATAATAGGCTGCAGCTGGTCCCAACCGTGGCCTTCGGGTTGGCAGCCGCACAGCTAGGCGTGCAGCAGCATGGCCACTCCCAGGCGGTTTCCGACGCTCGTGCATTTGGAGCAGAGAGAGGGGACGCTATTCACGGTGCTCG…	TCAAAAAAAAAAAAAAAAAAAAAAAAAAAAAAAAAAAATAAAATAATAAAATCTTTAAATAAATAACATTTATTTTTTTAATTTTCTAATTTTATATAAAAATAAATTTTCATTTTTAAATTCATAAGAAGAAAAAGATGGGAAGAGTAAC
KHDC3L	12:35434123-35435679	KHDC3LL3	22:4609570-4609570	NA	NA
KHDRBS1	2:69108822-69148067	KHDRBS1L1	4:25437586-25437604	NA	NA
KIF15	20:43454025-43532361	KIF15L1	15:54074553-54074553	NA	NA
KIF23	30:33313029-33337663	KIF23L1	2:29567205-29567205	NA	NA
KIF23	30:33313029-33337663	KIF23L2	28:11872118-11872118	NA	NA
KIF2A	2:48642961-48714025	KIF2AL1	34:41862624-41862640	NA	NA
KLC3	1:110190252-110194950	KLC3L1	X:38754175-38754189	CCAGTCCCAGCTCGATGGCCTCCAGCGCGTGGCTCACCACCTGCTGCTTTTCTTCCAGCAGTTCCAAGCCAGCCACCAGGCCCTGTCCTGCCAGCGCCTCCGCCAGGTGCCTGGCCAGGCCATGGTGCTCTGCTCGCAGGGCCTCCAACCCCTGCACCACTTGTCGCGTCTGCCGCACCAGCTCCTCGGGGCTCAGGCGCTCCGGGCCCAGCCCCACACTTCCAGGGGCTGCCACCTGCACGGACATTGCTGTTCCTGTGGAGGTAGGCCTGAATGATGGCCCATTTCAAACTTTATAGCATCTGTTTCTTTGATGACTTTCCTTTTGGGTCCCTTTTTGCCCAGGTTGGCATTTGGGACCTAGTAAGAACTATAATCTGGAAGTTTGGGAGTAATGCC…	GGGGAGGAGGAGGCAGCCCAATCTCCTGACCCTGATATCATGCCCTGAGCTGAAATCAAGAATTGGACATTTAACTGTCTGAGCCTCCCAGGCAACCCTGCAATCTTCATTTCAAACTTTTTTTTTTTTTTTTTTTTTTTTTTTCCTGGCTTCCAAGTCTACAGCCTTTTATCGCAGGGAAGCCCCGTACAGAGGGGG
KLHDC3	12:11542449-11549012	KLHDC3L1	8:7372771-7372771	NA	NA
KNOP1	6:25564625-25584162	KNOP1L1	2:30275972-30275987	GCACGTAACACAGTCTCAGGTTCTAGGCACTCCTCACAGAGGGTGCTGTGGCCCTTCTTTTTCTTCTTTTTCTTCATTAGAGGCATCTCAGATGCCTGCTCTAGGACCACACTCTTCGAAGGGGATGTGGCTCTTGTGGAACAGATCTCACTGAAATAAGCATCACTGTTTAAAACTGAGTATTGAGTCTCTGGTTCTTTGACCACCTTCTTCTTTTTCTTCTTTTTCTCTGGGAGCCCAAGGCCCAGGTCTCCTTTGTGGGTTTTGGTGATCATTTCCGCAGGCCAATCTTCCCCGCCTCCACGTGAAAGCCAGCTCTGCCCCGACCCGCGATTGCATCACTTTAAACAAGCTTAGTAAATTTGAAGATGCACATACCAAGGGCTTATTGGGAAACTC…	GAAAAAAAAAAAAAAATTGCCTGGGTTAAATAAAAAAAAAAAAAAAAAAAAAAAAAAAAATAAAGTGATGCAATCATTTTGCCCTTCTACTAATTATGTGTAAGAGTTTGCATTTCCTTATGCGATCACCAACCTTCACCAACCACCAACCCATCACCAACCACCAACCTTGTCAGACTTTAAACTTTTTGCCAATCTAATGGGCATAAAATGACATCTCACTGGCATATCAAAAGTTTTATTTTCTTTCTCTGTG
KNOP1	6:25564625-25584162	KNOP1L2	3:42574562-42574578	CAGGCCAATCTTCCCCGCCTCCACGTGAAAGCCAGCTCTGCCCCGACCCCGATGTAGCAGTCTTAAATGTGTTTGCATATGCACCAGACAACAGAGCTGCAAAGTATGTAAACAAAAGCTGATGAACACATTATATTCAGGAGCCCTCAACTTGTTCCAAATTTGACCATATACTGGGCCATAAAACAAACCTTAACAAATTAAAAAAAATTGAAATCATACAAAAT	TCAGGGATGAAGAAAAAAAAATTCCTGGGGTCCCCCAAAAAAAAAAAAAAAAAAAAAAAAATAAGACTGCTACATCTTCTTAGTGGACTGACCTGAGTATCATTCTACAATGTCCTCTACTCCTGGTAATTTTCTTTTCTTTGAAGTTGACTTTATCTGATATTAATATAGTCCATTCTTTTTTTTGGATTAATATTTGCATGATTTATCTTATCTCATCCTTTTACTTTCAACCTACCTATGTCA
KNOP1	6:25564625-25584162	KNOP1L3	3:80173953-80173969	ATTTTGTATGATTTCAATTTTTTTTAATTTGTTAAGGTTTGTTTTATGGCCCAGTATATGGTCAAATTTGGAACAAGTTGAGGGCTCCTGAATATAATGTGTTCATCAGCTTTTGTTTACATACTTTGCAGCTCTGTTGTCTGGTGCATATGCAAACACATTTAAGACTGCTACATCGGGGTCGGGGCAGAGCTGGCTTTCACGGGGAGGCGGGGGAGATTGGCCTGCGGAAATGATGAGCAA	AAATACACTTCAAATATGATGACATAGGTAGATTGAAAGTAAAAGGATGAGATAAGATAAATCATGCAAATATTAATCCAAAAAAAAGAATGGACTATATTAATATCAGATAAAGTCAACTTCAAAGAAAAGAAAATTACCAGGAGTAGAGGACATTGTAGAATGATACTCAGGTCAGTCCACTAAGAAGATGTAGCAGTCTTATTTTTTTTTTTTTTTTTTTTTTTTTTTTGGTAACCCCCGCCATTTTTTTTTCTTTCCCCCCCAACCA
KNOP1	6:25564625-25584162	KNOP1L4	9:35084583-35084602	CTAGTATTCATAAGTTAGTATAATTTTTGTTCAATTCAATTGTATAAAAACACATTGCCTTTTCTCAATAATACGGGTGGATGTGCATACTGGTTTATCTTATTACTCTATCCAATTTTTGCTAATATGTTTTCCTATATGAGAGCTGGCTTTCACGTGGAGGAGAGCTGGCTTTCACGTGGAGGCGGGGAAGATTGG	AAGTCTATTCTAGTTATCTAGGCAAAGCTTTCAATCACTATACTAAACGAACAAATCATATAGGAAAACATATTTTTTTTTTTTTTTTTTTTTTTTTTTT
KNOP1	6:25564625-25584162	KNOP1L5	12:65163039-65163055	GGGGGCCGGATCCCACACTCCAGCCCACCAAGGCCGCGGTGGATCCGTGGAAGAAGTTGGAAATCGCAAGCAGGCGAAGCCTTTTTTTTTTTTTTTTAAATGACATATGGGGGAAGGGCTGAATGTATCAAAATCATGTAAAATTTCTGTTCTTAGCAACATCCTTGTTATTAGGAATGATGACTAAACCGCCAGGATTATTCTGGACTGTAAGTTATCAAGAGCCCACTAATTTGCTGCGGGTGAGTGCTGAGGAGCGGCCTCGGCGGGGCGGCGTGGGGTCTGAGACGTGCGCGGCGAGCCGAGGGAAAAAAATGATCACCAAAACCCACAAAGGAGACCTGGGCCTTGGGCTCCCAGAGAAAAAGAAGAAAAAGAAGAAGGTGGTCAAAGAACCAG…	TAAAAAGTAATGAGTTGAATAAAAATTATCTCAGCTCATTTTCTGATTATGTTAATTGTTAAAAACCCTTCAATCACGACGTTGCAGTCAATGGGCTTTAATGTGAAATTAGTGGGCTCTTTTTTTTTTTTTTTTTTTTTTTTTGAGTGAACCCAGGCACATTTTTTTTTTTTCATCTCTGAACCTCAGTTTCCCCTTCCGTTCTAATGGGGTGAAGGCAACTATTTTAT
KNOP1	6:25564625-25584162	KNOP1L6	30:28790106-28790123	CAGGCCAATCTTCCCCGCCTCCACGTGAAAGCCAGCTCTGCCTTATTTAGTTATTTTTAGACCAGATTGAAAGAAATTCAGTTGTAACTGTTCTTTCCAGAAGGATCATGCACTATTGTCAGAACCATATAAAGTTTGAAAAGCCATACTAGGGATCCCTGGGTGGCGCAGCGATTTAGCGCC	AAAAAAAAAAAAAAAAAAAAAAAAAAAAAAAAATAAAAATAACTAAATAAAAATTAATTAATTAATTAATTAATTAATTCTGGTCTAAAGTATATTGTTCCTGAAAGGCATTCTTTGCTGAAGGCAGG
KNSTRN	30:7562738-7573514	KNSTRNL1	11:66534565-66534580	NA	NA
KNSTRN	30:7562738-7573514	KNSTRNL2	33:14643750-14643759	TGCCCTCGTCGCCCTGGTTCAAAAGCTAAAGTTTTTTTTTTTTGTTTGTTGTTTATTCATTCATACATACATTCATTCATTTATTGCTGTATGAAATCTAAAGGTCTGGAAGCCAGTGACTTAGCATGCTGCATCCTCCCAAAATG	TTAGTAATCTGCCAAACTTCATTAAAGTTTTTTGTTGTTTTTTTTTTGTTTATTGATAAGTACAATCATTCCTTTATTCTGCATTTTCATCGAAACTTCTCGATAATTGTGACTTGCAATCATTCACTCTGTCATAAGGTAGAGTGTCTAT
KPTN	1:108535140-108544405	KPTNL1	5:46398648-46398655	NA	NA
KRR1	10:15977575-15992392	KRR1L1	26:6486430-6486442	AGCAGGGAGTCGGCTTGAGATTCTCTCTCTCCTCTCCCTCTGCCCATCTCCCCACTCATGCACATTCTCTCTGTCTCTCTCTCTCTGTCTCTGTCTCTCTCTCTCTCTCTCTAAAATAAATAAATAAATCTTTAAAAAAAAATAAAAAGATATTTATTTGGATTGTATTTAAAACAACCGGAAGCAGCTGGAACATGGCGGCCTCCTGCTTCCACGGGCTGGC	AAAAAAAAAAAAAAAAAAAAAAAAAAAAAACAACCGGATGTGTGAGAGCTTGAGTTTAGTGCTGGGGGCTCTGGGCTAATATCCTACCTGCTGTGCAGACATGAATAACACGGGGATCATTTTAGGCTAATAACACATCTCTGGCTTATTTATATAACATCCCCCACCCCTCAGTCTCTCTCCCTAGGTGGTTTATTAAAGAATTTCTTCCA
KRT18	27:2189269-2193368	KRT18L1	13:24630300-24630315	ACTCGGGAGGCCAGGGCTCAGGCTCGGGCCAGGGACCCTGACCTTTTCTTTATTGAAAAGTTTTTAATTAGTGCTTCACTCTCTTTAGTCATCATTGGTCTTTTAGGATTTTCTATTTCTTCATGATTCAGTCTTGGCAATAATATACTTGGCAGTATATTATTAGAAACTTATCCATTTCTTCTAGGTTATCC	AATAAATAAATAAATAAATAAATAAATAAATAAATAAATCTTCAAAAAATTAAATGTTTGGTATATCTGGTCCTGACCTTTTCTTTTTTTTTTTTTTTTTTTTTTTTTTTTTTTTTTTTTT
KRT19	9:21240778-21245039	KRT19L1	13:48457039-48457054	CGCCCGAGCCCCCGTGGATGCTGGGCGCGCGGAAGGCACCGCCCGGCCCGAGGCGCAGGGAGCCGCCGCCCAGGCCCCCGAAGGACGAGGTGGCGGACGAGTGGCGGTAGCTGTAGGAAGTCATGGCGAAGGAGCGCGCGGGCCACACTGGTCGCAGGAGCAGCGGTGGGCGAGAGTGTCTTTGATTTTTATTTGAAAGCAAAACTTCCTTTTACCCTTCCATATTGCTTTGTTCCTGATAAAAGAATTGGTTCACTAGGTTAGCATGAATTAATAGGTGCTTATTTTACCAGTCAGGTTATATAAGCTTGACCACAAAGAGCAGTACCAAAATAACAGTAACTCAAATACAATAGAAATTTATTTCTATCTC	NA
LACTB2	29:19723155-19749147	LACTB2L1	10:42471327-42471327	NA	NA
LACTB2	29:19723155-19749147	LACTB2L2	19:21879035-21879050	NA	NA
LAPTM4B	13:41134-127399	LAPTM4BL1	2:10533412-10533585	NA	NA
LAPTM4B	13:41134-127399	LAPTM4BL2	4:68621421-68621439	TTTAAGCACATCCATGTAACTACTAAGAATTCTTGGATCCCTCAGTAAATCCCTTCTCTAAATAAATACTTGTTGGGGGCCGCAGCAGCCGCTCGGAGGTCTGGGCTG	GTTCGTATCTATATAAATAAAACAAGAATTTCCTTAAGATTAAAAAATAAATAAATAAATAAATAAATACTTGTTGAATGTTTCTTTGGTTTTCTTTAATATTGTTCCATCAATTGTCCTTTCTTTCTTATCCTTTCTTTTGATTTACAAAACAGTTTAACATTTGTTACCTTTTAAATTCACCTAATAGTTTTCTTGTGAATTAAGTTGTTTACCAAGTTTGACTCTCCTAAAAACTTTTTATTGTGGAAAATTTCAAAT
LAPTM4B	13:41134-127399	LAPTM4BL3	21:21739489-21739504	NA	NA
LAPTM4B	13:41134-127399	LAPTM4BL4	X:108227821-108227834	CTGCAATCGCAATGCACATGTTGGCATCATCCATGAACTCAAAGTCGCCACCTAGCTCAGAACTTGAAAAGTGGTACTGGTCTGGGTCAGCCAGGGCGCTCAACAGAATTAGCAGCACCACAGCGTTGATGATCAGGTACCAGACGCCCAACAGGATGGTGCCGGTGCGGACATGGCAGCACAGGCAGCAGCTGCTGGAGTAGAACCGCGTCCAGGGCTCCCTGAGACTTTTCTGTGGAAGTCAGCCAGGAAGATGCCCTTTTCCTCTGTGGTTGCTGATCTAGACAGATGTGAGGGTAATCATCTTCCCTGACACATGAAGAAGGCTTGTTTGAAAAGGAGAGCCTATGCAGAGGGAAGCAGAACAAAGAGATGCAGTGAGAGAAAGACCACACACAC…	ACCTACCTGCCACCCCAAGCCACTGGCTGTGAATGTGGCCTCGGTCTGGCAGAGTACCCCAGACACAGGGAGTGGTTCAGGGATGAACTTATTACCCAGACAGGACAAAACATAATTATCCCTGAGACTTTTCAAGCAATCTGGTGCCAC
LARP7	32:32421648-32439431	LARP7L1	4:69819366-69819383	AAAGTAATGTTTGTTTGTTTGTTTGTTTGTTTGTTTGTTTGGGCACCTAATGGGATGGTTCTAAGGATTTAAAGCTAAGCCTCCTGGGAAACCAGCTCTATAAGGATCTGGAGACGGA	ATTGAAATTTTCCCAAATAAAAATTTAAAATTTAAAAAAAAAAAAAAAAAAAAAAAAATAAAGCTAAGCCTCCTGATTCTTCACCCTCCCTAAGATGTCCTAACAGAACAAGAACCAGGCATGATTGGCTTGGGGAAAAGGTGTTTTGTTTTGTTCACAGTTGAGGTGGGTAGATGCTGTGTATCAATGTAGCCAGCTCAAACAACAGCTCAGAAGAGTAGGAATATTTAT
LARP7	32:32421648-32439431	LARP7L2	5:25652320-25652331	TTTCCATTCTCTGTCCAGTTCCCAAAATACTGGGCCGGTGATTTCGTCCGGTATTTCTTTGAATTAATGGAATAACTTGGGAAGAATTGAAATCTTAACAATATTAATTCATCCAATCCATAACTATGATATAGCTCTT	AAATATTTATATTTTGTATTTAAAATTGATTTATTCAAGGTGTTTGAGATTATTTGCATTGCTACATAAATTTTATAATCATCTTGAGAATTTCTACAAAAGGCCAATAGGTATTTTTGAATGTGATTGATATATCTTTGTATCAATGGG
LARP7	32:32421648-32439431	LARP7L3	29:29406985-29407000	CTATTTGCTCTCGAAGAAATCTATCTTTGTGTAGATTTGCATCTCCAAACCAGAAGTCCACTTGCTTAGCAATATCTGCCAGCACTTGTTTAACTCGTGACCGTTTCTTTTTTTCTACTTCTTTTTTCTTTTCAGTGCATTCTTCCATTGCCTTTTCTTGATTTCCCCCTTCAGTTTCCATTCTCTGTCCAGTTCCCAAAATACTGGGCCGGTGATTTCGTCCTCCAACCTTTCCGTCTCCCGCATATTTGCTTTTTATATCAACCTGCCATAATATGAATTGATAAAGTAAGAAATAAGCCTTGCCAAACTCCTAAACATTTGTGAATATATTGCAATTTCAATAAATTTTCATCTTTTTTCTTTTCTTTTTTTTTTTTTCTTTTTTCTTTTCTATAA…	CGTTCCATCCTTAATCATCTGATTAAAAATTCTATTTGCTGAAATTATCTTACACAAATCAACCCCAAAGTGATTTAGTAAATGTTTTCAACATTATCATTAATTTTGTTGTTTTTATATTACAAAAACAATATTTGCAAAAATAATACTATATAGTAGAAAAAAATGTTTGACATTGGATTCACTGTACTTATTTTGTAATTTGCTCTTTGCTTTTCAAATGTCTAGGATATCTTTTCATGTTGATTTATACAGAGACATATGTGTGATATTTCATTCTGTTTCTTGCACTTTGCTTACCTGAGCTTCCACTAAATGGGCCATATGAACTGTTCCCAATTAAAATGTTAAACTTTAAAAAAAAAAAAAAAAAAGCAAATATGCTTTGTAACACTTTAT…
LDHA	21:40829844-40840947	LDHAL1	6:28363098-28363112	NA	NA
LDHA	21:40829844-40840947	LDHAL2	16:24169951-24169966	AACAAATACACAATATAAAAAGATGTAAATTGTGACATCGCAACCCAAAGTGTTAGGGGAGAGAGGTAAAAGTGTAGAGTTTTTGTATATAATTGAAGTTAAGTTGTTTTCAGCTTAAGACAGACAGTATTAATTGTAAGATACATAAGCAGATACATAAAAGAAAAAGAAAACAATCAAAGCATATCACCATAAAAAGTCAAAGGAAATGGAAAATGGCAAAGGAGAAAAAGAGGGACAAAAGAACTAGAAGTAGGAGTCGGAGCCGCCGCCGCCGCCAAGTCCCGACGTGCACGCCCGATTCCTTTTGGTTCTAAGTCCAAAATGGCAACGCTCAAGGATCAGCTGATTCAGAATCTTCTTAAGGAAGACCATGCCCCCCAGAATAAGATTACAGTT…	TGTTTTTCTTTAATCCATTTTAGGCACTCTATGTCTTTTGATCGTAGAGTTTAATCTATTTATTTTTATAGTAATTATTGATAGGTAAGAACTTATAACCGTTTTGTTAATTCTTTTCTGTTTACTTCTAGTTCTTTTTTTTTTTTTTTTTTTTTTTTTTTTTTTTTTTTTTTTTTTTTTTTTTTT
LGALS3	8:30977438-30994705	LGALS3L1	38:4896334-4896350	TTAAACCTTCCCCACTCCCCAGCATCAGTAAGCTGCCCCAGGAAGATGAGCAATAACTGGTGCAAATCTGAAGGATGGGGAATGGTAGATAAATTAATCTATCAAAAGGTAATAGATTGGCCAGGGTAGCCGCCGGGTGGTGCCTGGCCAGGCGCCTCCTGGC	TTCTTGTAAATCATCCATTTAATAAACATTCTAAGAGTTAAAAAAAAACAAAAGGTAATAGATTTATTATTCATTTGGTACTTTCCTGGTGTTCTGTTTTTGATTATATTCCAGACTTATAAAAAGTTGATTTTGGGGGATCCCTGGGTGGCTCAGGGTTAGTGCCTGCCTTTGGTCCAGGGCGTGATCCTGGAGT
LIMS1	10:35192582-35339100	LIMS1L1	14:45356508-45356527	NA	NA
LLPH	10:8631891-8638922	LLPHL1	10:7258385-7258401	CCTTACGAGTACGTTCAAGAAAAGAGGAGACAGAAAGTGGAGATTTCCGTGTTTGGACCGGCCCTGCAGGAGCGAAGCTGGCTGCGGCCTCTCAGTCATAATCAGAGGAAGGAAAGGCCTGGGCCATCTGAAGGCTGCGACTGCGGCCGAGCCAGTGGCTGGGGTCGTGGCCTGGGACGCGGCGACAGCTCAAGGTCAGCGGGTGTCCGCTTGGGCTCGGGCTGCCCGGGCCGCACTGGGCCAATATAACTATAGTCGTGTCCTCGT	TGACGATGTTTGGGTACCACCACGGTGGCTATCTCTTGAACATCTTTCATTAAAACATCACTATCCATTTTAAGAATACTCTTTAGTCTGCTGAGTTCCTTTGGGGCATTCTTTTTTCTCTTTTCCGCATGCATCTTCCTTTTCCACTTACTCCGTAAGCTTTTAGCCATGTTACCTGGAAAGCGGGACACTCGGAGGCCGGTCACCGCGCGCACGGCCACGCCGACCGGAAGCCGCCCTGTCTCCTCTTTTCTCAGCTAAAATGCAGGTGCTAAAAAAATTAAAATAAATATAAAATAAAATAAAATAAAATAAAATAATAAAAAATATAAAATAAAAAAAATGCAGGTACTTTGCACCTACCCAATGTCGCACAGTTACTTGGGGTGCTTGCCTGCC…
LOC100682992	29:36464870-36466666	LOC100682992L1	29:10235487-10235503	CCTCAGGAGACTTATCTAGAAAAATGCTACTATGGCCAATGCCAGAGAGATTATTGCCTATACTCTCTTTAAGGATATTTTTTATTTCTTTCATTAGTGTTTATTATAGTTTTCAGACCACAGGTCTTTCACTTCTTTTATTAAGTTTAGTCCTAGATATTTCATTGTTTTTGGTGCAATTGTAAATGAGATGGTTTTCGCCCTGTCGCGCCGCGCGCTGGGCAGCGACCGTTAGATTGCCG	AGAAAAAAATTATATTTGTGATTTTAATAAATTATATTTTTTTTTTTAAAAAAAAAAAAAAAAAAAAAAAAAAAAAAATGAGATGGTTTTCTTAACTTAGTTTTCTGCTGTTTCATTACTAGTGTATAGGAATACGACAGATTTCTGTGCATTGATTTTGTATCCTGCAACTTGACTGAATTCATT
LOC100683303	29:16461969-16465232	LOC100683303L1	X:106961049-106961065	GGTGCCTCGAGGACCCTCCGCCATCGCCGGCCGCGCGCCTGAATTTGACTTTTTAAAACTTTTTCTTTCTTTCTTTTTTTTAAAGATCTCACACATGAGTGATACCATGTAGTATTTATCTTTCTCTCTCGGGTTTATTTCGCTTAGCATAATGCCCTCCAGTTTTATTTATTTATTTTTTAATAAT	TTTTTTTTTTTTTTCCTTTGAAAAAAAAAATAAAACCAGAAAAAAAAAAAAAAAAAAAAAAAAAAAAGTCAAATTCATAGAAACAAGAGAGTAGAATTGGTGGTTGCCAGGAGCTGGGAAGGGGGGAAATTGGAAGTGGCTGCAAAGGGGTACAAATTTCCAGTTATAAAATGAATAAGTTCTAATGATCTAATGTATCACATGATGATTGTAGCTGATAATACTGTATTGTAACATTGAAATTCGCT
LOC100683646	X:122566522-122567799	LOC100683646L1	21:8580596-8580612	CTCCAGCACCACCCTCCGCACCACCAGCGCCGCCGGGAGCCTGCATGGTAACTTGTTGAATCTTTACATTGATATTTTTTTACCAAATTTGGGGAAAATTCAGACCACAACTCCTTTAAATATTTTTTTTCTGCCTCCTTTCTCTT	GAGTTTTCTCTTTATCTTTGATTTTCAGTGGTATAACTGTGATGTGAATATCACTGGAAATTAGATAAACTTGTTGAATCTTTTTTTTTTTTTTTTTTTTTTTTTTTTTTTTTTTTTTTTTTTT
LOC100684741	12:1305188-1307196	LOC100684741L1	6:1090479-1090495	NA	NA
LOC100684741	12:1305188-1307196	LOC100684741L2	11:35546838-35546856	GAGAGCAGCCGGACCGACCACCGCACAAAGGGCGCTAATTTCCTGATTTAATCACTTAAAGATAATTGTGTAAGAGAACATCTTTGTCTTTAGGAAGTACATACTGAGATATTTAAAGGTAGAAATAAATTGTAACATCTAGAATAGGATTCCAAATAACCTGGGGGTGGATTGTAAATGAAATAAAATTGGC	ATTCCAATAAAATACTTTAAAATAAGAAAAAAAAAAAAAAAATAAATAAATCAGGAAATTAGCATTGATACAAAACTATTATCTAATCTATATGTCTTCTATGGTATCATTTAGTACACAAATGTAAAAGTTAGGTCTCTTTTTAAAAGCATCATGAGACTGTTACCACACCTAAAAAAATTTAACAATAGTCATCAAAGATACTATCAGTGTTCACATTTCCCCGGTTGTCTC
LOC100684741	12:1305188-1307196	LOC100684741L3	17:29559888-29559902	CCACGGCACGAGAGCAGCCGGACCGACCACCGCACAAAGGGAGGTCTGCATTTCTAACAAATTCCCAGGTGATGACCATATTGCTGATTCTTGGAGACTATCACACTTTGCAGAGTGCAGAAACATAACTGAGCACAGGGTTTTCGAGTCAGCGTCCTAAGTTCAAATCCAATTTTGTCTCTTGCTAGCTCTGTGACTGTGGGCAGGGTAAAACTCC	GGACTTCCGAACTGGGGAGCTTGAGCATTTGCATTCTAGGGTTAGGGCTGGGGCAGGTTAGTTGCCCCTGCCTAGTGAAGCAGGTCTGCATTTCTTTTTTTTTTTTTTTTTTTTTTTTTTTTTTTTTTTTTTTTTTTTTT
LOC100684741	12:1305188-1307196	LOC100684741L4	19:37868734-37868734	NA	NA
LOC100684741	12:1305188-1307196	LOC100684741L5	30:15416894-15416897	NA	NA
LOC100685822	2:77211660-77216291	LOC100685822L1	13:54281046-54281062	NA	NA
LOC100685930	X:47936063-47986800	LOC100685930L1	15:44698008-44698023	NA	NA
LOC100686073	2:59603021-59604173	LOC100686073L1	8:13531138-13531154	CAGAATAAAAGCCACACTTCTAAGACATTCTACTACTTCTCTAGGGACTTTTCTCCTTTTTTCTTCATGTGCATGCAGCTATGTGTGTGTGAAGCATTTTCACTTCCACTTTTCCCTATATTTTGTAAGCTGGGATATTTTTTTAAAGTCTAATTGTTGGTCTCCCGCCCGGGCTCTGACTCTCCGTGTGGTCTGCCTGGGACCTCCGTC	AAAAAAAAAAAAAAAAAAATAAAGTCTAATTGTTGCAAAAAATGTTGATGAACCAAGATGTCTCCTGAAAAAATGATTAATCCAAAAAACAAGATTTAGCAATTTCAAATCATTTTTGGATACTCCCTCTACTCACACTGACATCAATACTATATGTTTTCATTTTTTAAAGGTTG
LOC100688055	12:45680080-45682107	LOC100688055L1	27:35987898-35987914	CCCAGGAAGCTGTGTTAAGACTGTCAGGTTTCGACCAAGTAATTTCCCAGCAAATACTCTCTCACGTGTTTTGTTGGAGTTTTCCTTTGCATCTCATCATCTTCAGAGAGCAGCTTCATTACACCACCGAGAGCCATTGTTCCTTCCACCGGAGCAGCGCCTCCCAAGTCCAGACGCAAAAGACCTAGCCTTCCTTTTAGTAACATTCTTTGTGCTGCTGCAAACTTCCTAGAAATTTCATAAATTTATGTTCCTAGGAACTCAGGTAAACAATTCAGGACACTGAGGGCTT	TTAATGATGTTCCTTTCCATTTTTTTTTTTTTTAAAAAAAAATTTTTTTAAATAAAAAATTGAGAAATAAAAAAAAAAAAAAAAAAAAAAAAAAAAAAAATAAAAGGAAGGCTAAAGAGAAGTAAAATACTGAGTTAAAAGTAAATATTTTTTTACTAATACAGGTGCACACTGAGAGCTTGAGAGAAGAGGTCATTA
LOC100688778	X:42409457-42417783	LOC100688778L1	6:18820062-18820132	NA	NA
LOC100688778	X:42409457-42417783	LOC100688778L2	18:10097812-10097829	NA	NA
LOC100856041	5:29223682-29284076	LOC100856041L1	5:85268943-85268943	NA	NA
LOC100856280	27:37114192-37167519	LOC100856280L1	1:70894260-70894260	NA	NA
LOC100856280	27:37114192-37167519	LOC100856280L2	4:15685864-15685880	NA	NA
LOC100856280	27:37114192-37167519	LOC100856280L3	16:53773428-53773446	NA	NA
LOC100856405	27:5333706-5340363	LOC100856405L1	10:46487536-46487552	CACTCCCCATATGCCCAAGCCTCCTGGAAAATGCAGGATAAAGGCCAAACTCCTGAGAGTGACATTCAAGGCCTTCCACCTATCTTTCCAGGCACTCCCTAGCATGACTGTTGGCTGTCCACCCCACTGGGCCCTTCTCTGATCTCTGAATACATGTAAGCCTTGCTGTGTTGGGGACTCCACCTTTGACATTCCCCAGAGTGCACTGTCCCCCACTAAACTCATTTGAATGCTATTTGTTATTCAAGCTTGACTCAAATCCTAACTTCACCAATCCTTTTCTTGTTCCCGACCTAGATGTGACCATGACCTTCTTGGAAGGAAGAGGGCAGCAGGATAGTAGAGAAAGAATGCAAGTCTGGATCTGACTTAAATGTGAACAAACTCGGACCACTTCTC…	TGCTATTTCCCTGGTTCCAATTGTCCACACTCCCTCCCCCATGATCCCAATAACCTCCAAACTCCATTCTGCTTCTGCTTCCTCTGGGCCTCACAGACTATCCTTAACACACCAGCCCCAGGGAGCTAGTGAGTTTGTTCACATTTTTTTTTTTTTTTTTTTTTTTCTTTTTTTTTTTTAAAATAGAAACATCCCTTTTTTTTAAAAGTTAGGACCAAAACAGACAGCTTCAACAACAAAAAAAAAAACATCCCAAAAC
LOC100856405	27:5333706-5340363	LOC100856405L2	12:56927152-56927167	NA	NA
LOC100856405	27:5333706-5340363	LOC100856405L3	24:25769771-25769787	NA	NA
LOC100856405	27:5333706-5340363	LOC100856405L4	38:13013636-13013654	NA	NA
LOC102151412	1:104456015-104475552	LOC102151412L1	22:18648504-18648522	AAAGATGCTTCGACGCTTGGTTTTGACAGCAAGCTCTGGGTGTCACGAGAAGATATGGCTGAGACCCCGCCATCTCTGCTCCGTCCACCTCGGCCTCTAGCGAGCTCTCTCACAAGATCTCCGTGGAGGAGTCCCAGAAAAAATATTTCAAAGATATAAGAAGTATTATGAACAACAGCAACCTGACATGAGAAGTCTTACCCAACAACTGCAAAATATACATATTTAAGTATACCTGAAATATTCACCAAGATGGACCATATTCTGGGCAAAAAAATAAATAAATATAAAGCCATAATATGTATCAAAAGATTACAATTTAATGGAGTA	AAAAAAAAAAAAAAAAAAAAAAAAAAAAAAGAAATATTTTTTCTGAAATTTTGTCTAGTTTTTTAAATCACTGAGAGCAATTACATAATATATATCTACAACTATATATTCTAGATTTGCTATTTCTCTCTTTAGCTTTTTCAGCTTCTACTTCAGGTGCATTGAAGCAGTGTTATTAGACATATGTACACTTATAGTTGTTATGGTCTTA
LOC102151412	1:104456015-104475552	LOC102151412L2	27:14121869-14121885	NA	NA
LOC102151514	19:31716948-31734342	LOC102151514L1	24:39311216-39311231	NA	NA
LOC102152359	5:67949974-67957193	LOC102152359L1	12:29768869-29768876	ATGGCTGCACCTTGGTCACCTGGCCAGGGTCATGTCCGTCTGGTTTCTCCATTTGTTGGTAGGTGGTCTGCTTCTGTGTGGTGAACCAAGTACCGAATCTATTTATTTTTCCATTTTACAGCTTTGCCATTCCTTTGGATACCTTGTCTTCCATAGCTAGTCAGTTGAAGAGGAATGTAACACTGTTTCTTAGGAGCCTTTGTCTAAAC	AAAAAAAAAAAAAGGAAGAGTAAAAACTTTCATCCATCTTCATCTTCATCTACTGACTGATTGACAAATAAACTTAAATCAAATGTGAACTATTTTATATTATACATTAATTTATCCTAATACAGCTATAAACCAATTTTGAATTATTTAGCAAATGTCAAAAAATGTGTAGG
LOC102152918	2:65896044-65974449	LOC102152918L1	13:2968683-2968683	AAAGGGGCAGTAATGCTGAGGCACCCCCAGAGTTCTCCAATGGGCTGTCCACGGTGCTAAACACTCATGAATGCCCCTCTGACCGTCTTTCTTTCCTTGCTTCACTTCTCCACTCTCTCACCAGTGCTTCATGGAGTCACCTTGCATATATGCCACTTGCACCTGAATCCTTATCTCCAGGTCTGCTTCTGCGGGCCGGCGGCTGGAGGCGGGCGGAAGGGCTCCTTGTCAATATCTTAAACTTACAGTGAAGTCAAACAAGATGGGCAGAATCTGCACAGCTACAAAACAAATGCAGTGATAAATTACAGCAGAAAGAGGGAATGCATTTTGTAAATCCACAGGATCAGATTTGTGGCTCTAAGCAATTACCAGCAAATAGTTGAGTGTTC	AACAAAGTAGGAAGGAACATATATTAAATCTGAAACTTAGGAAATTAAATACATGGAAAAAAAGACTAAATTAAGATTGCAATAGAAGTCGCTAAGAAACTATCACCACTGAATAAGCTTTTCCTTGTCAATATCTTTTTTTTTTTTTTTTTTTTTTTTTTTTTTTTTTTTTTTTTTTTTTATTTATTAAAATACAAAAAAACACCCAGTGCCCCGACCCCCT
LOC102152993	8:35571488-35640448	LOC102152993L1	X:74364958-74364958	NA	NA
LOC102153599	18:17721394-17738985	LOC102153599L1	3:82367679-82367679	NA	NA
LOC102153599	18:17721394-17738985	LOC102153599L2	26:34821775-34821775	CATATAAATGGAAATTATTTTCATTCAATCAAAATGAAGCATAACAGTTTTGTCTCATGCGAGCCCTGGGATTCTCCTTTTCTCATTCCCTTTCTTCCTCTGCTCTTTGACCCTCTTCCTCCTCCTCTTGCTTTGTCTTCTTCCTTAAGAAATATTAATATGGGGGAGCGGCGGGCGCGAGCCCCCCAGCTCGGGACCCCC	TAAAAAACTACATTTTAATGACAATGTGAATAACTGACATTACTCAAAGAATAGTCACATGCAAATCTTTTTCCATATTAATATTTCTTTTTTTTTTTTTT
LOC102153942	X:24518137-24530007	LOC102153942L1	X:22086963-22087083	NA	NA
LOC102154096	32:6842904-6852026	LOC102154096L1	27:15988845-15989044	GGTGCATGGAGCCTGCTTCTCCCTCTGCCTGTGTCTCTGCCTCTCTCTCTCTCTCTATCTCTGTGACTATCATAAATAAATAAAAATTTAAAAAAAAATTAGAAGCACTTATACAGCTACTGGTGGCTCTAGAAAAAA	ATTAAAACTATTCTTGAGACTTTAATAAATAAAATGCTATAATTTTCAAAAAAATAAAAATAAATAAAATAAATAGTATTAGGAAACTAACCTTATGCAAAAGTACATTCTAGACTTATTAAAGATTTAAATGTCAATATGAAAAACTAGCAGTACTAGGTGAAAAGATAGGAAAATGTCTATAAATATCAGGGCAGGGAAGGAGTTTATAATATAAAATAATAACATAGAAACCATATGAAATAGGCAAGAAGAGTAACAATGTTATTTAC
LOC102154281	12:53096689-53110159	LOC102154281L1	32:6728467-6728483	ATTTTAGAGGCTCATGAAACCCCTGAACCATCCAGCCCCAGCCCAGAACTCTGCTCCAATTGCTAGGACAGCTGAGGAAGGTAATCTGAGGGCCACTTAAGGCCTGTGTCCTTAAAATCATTTCTCACCATTGGCTACCTACTTACTGCCTACACATTAGACAGACTCTAACTCTGACCTACAAAACTCCAGAATCGCCCGGAAGGAGCGGGCCGCCCCTCGCGCGGCCGCCTGCGCGTCTGGGA	AAAAAAAAAAAAAAAAGGGAAGGAATAAAAAAAAAAAAAAAAAAAAAAAAAAAAAAAACTCCAGAATCATTGATAAGTATCTTTCCATCTTTCCTGCTGGTCTAAGAGACCTTAGGGATTACAGACCAGAGGCCAGTGATGGGAATAAGATG
LOC102154738	5:70233549-70240949	LOC102154738L1	2:68306292-68306308	NA	NA
LOC102155107	4:56779225-56925441	LOC102155107L1	31:30814342-30814356	NA	NA
LOC102155584	4:38885373-38887922	LOC102155584L1	2:7966981-7966997	TTGTGGGGCGCCGGCGGGTGTAAAGCGGGCGGGGCAGGGACTGCGCGAGAAACGCCAGCGCAGCCAGTTCTAGTTTATATCATTATCCACACACAATTATATCACCCTTTCATGCTTAAAGGTTTTCTTTGGACAATAAATTATATGATTGCACTAGTATTGAAGCATACATAAGGTTGACAGGAAAAAGAAGGAGGGAAAAAATTTCAGATGGACCAAATAGCAAGTCAAAAGGCACAGAAGAATAAAATCCCATGG	AAAAAAAAAAAAAAAAAAAAAAAAAAAAAATAAACTAGAACTGACCCAGGAAACCCAGGGTGTGTTCCAGTGTTTACCCTGTTCAAGAAGCAGCACAAACACCCCACTCCCTGTGTGCAGAGCCTTTCCTAATGCCCCAAATCAGAATGAATTCCTCCTTCCTCTATGCTCACCTTAGGAATTTGCTTAAGTCTGTGATTGCATTGACTCATAATTTAGCTAGTTATACA
LOC102155584	4:38885373-38887922	LOC102155584L2	30:5987634-5987646	CAGTGATTGACCGTCTGCTTTTGGGCCCCAAAATGGGCCCCAAAATAATGGAACCTTTTAGAACTTTAAATTTAGATCCAGGCAGTCCCTGCCCCGCTGGTTTTAAACCAGCAGGTCCCACCCAACTGC	AGTCGGCCCCATGATAATTGAACTTTTTAGAGCTTTGTATTTAGATCCAGTAAACTGAATTGTATGAATGTCTATGTTTTTCCTGAGCTACACAGTGTATTTTCTCTTGTAAAATTTAGTTGTGTATGCTTGAACAACCATGTGTGGTACT
LOC102156205	19:29380585-29386202	LOC102156205L1	12:4786756-4786771	NA	NA
LOC102156537	20:33780047-33783999	LOC102156537L1	2:24287492-24287508	TATTGGAGTTCCCGTTACTCCCCATCCTGGCCTGCCCTTTGTATTACTGAGCATTTTAATATTAGTCATTCTAATGGGTGTGGTTTTAATTTGCATCACCTTGATAAATGACATTGACATTTTAATATGCATTTCCCGAGAGAGCAGAGAGCATTTAACAAGAGTCTGATCTGACTTGGGGGCTGAGGATAGACTTCCTACAGGAAGAGATGCCAGAACTGAGATATGAGGGATGAATGAAGAGCCTGGCAAACATGCAAGCAGAATGATAATTTGACAATGAAGAATATTCAAGGGAAGAGAGCACATTTTGTGCTTAAACCCAAAGGAACTTCTTGGGCTTTTCTTCCTATGGGCGGAAGGAAGCGGGCGTGACAAGAGAGAACAAGCAAG	AAAAAAAAAAAAAAAAAAAAAAAAAAAAAATTAATATGCATTTCCCTGGTAAATGATATTCAACAACATTTTCATGTACTTATAGGGCATTTGTTTATTTTCTGTGAAGTTTTTTCAAATCTTTTGCCCATTAAAAAATCATATTGTTACATTGAATCA
LOC102156599	3:47223677-47286372	LOC102156599L1	38:21811359-21811359	NA	NA
LOC106558478	3:245256-248661	LOC106558478L1	X:74407215-74407233	CTCGAGGGTGAGCGGAGCCCGCGGCGGGCAGCTCGGCGCGGACCCAGAGAGTGCATTTGTTAGAGGAAGTACAAACTTACAAATTGACTCAGTAACAAAAAAAAATCAACCTAATGTTCTATATCTGACTTCA	TTAACACAAAAAAGTAATTATGTGAAGTGATGGATGTGTTAGTTTGATTGTGGTAATCATTTCACTATATATATATATATATATGTAAAATCATTACACTGTATGCCTTAAATGTGCATATTTTTATTTGCCATATATACCTCAATATAACTGGAAAAATAAATATAAAGGAAGACTTAGAAAATAAATAGAAAGTAAAACTTAGTGCTGAGTTGGAAAGGCAGATGAGTCTTGCCTTAGTTTAGAAAGAATCAGAGAGTGCATTTGTTTTTTTTTGTTTTTTTTTTTTTTTTTTTTTTAAAGTATGCTAAATTTTTAGTTTTTTTTGATCGGAAGAGCGTCGTGTAGGGAAAGAGGGTAGATCTCGG
LOC106558651	3:91744693-91745243	LOC106558651L1	33:3689637-3689654	AACTTAAAATAATTAAAACGTTTTTAGAAGTGAACAAACAGAAATCCTGGACTATTGACCTAGATGAACTAAAAAAAAGAGCCATTTGGTACCCCTGGGGGTGTTTCATCTTTCTAAAATTAGGTGTAATAGTAATGTTCTATTTCTAGTCTAGAGGATTATTTTTGGCACAATGAAATTCTCTGAAGCGTTGTACAAACACCTGAGCATGTTTAAGACATCAGAGAATTGGCTTCCGGCGTGAGGCTCACGGACAAGATGGTGCCGCCGGTGCAGGTCTCCCCGCTCATCAAGCTCGGCCGCTACTCCGCCCTGGTCCTCGGCATGGCGTACGGAGCCAAGCGCTACAGTTACCTGAAACCCCGGGCGGAGGAGGAGCGGAGGGTGGCCGCCGAGGAG…	AAAAAAAAAAAAAAAAAAAAAAAAAAAAAAGACATCAGAGAATTGTGCTTGTGATCCTGAACTTTAGAATTAGAAAGATCTTGGCCATTTTCTCCATATAGAGCATTATTGTAGAAGAATAAAAGGGATAATATATACATTGCACAAAATCAGATCCAATAAATGAGACTTTCTTCTTCCCCTTTATTTTTAATGACTTGAAATATTCAGTTTTAAAATAATCTTATAATGGAGAAGTGTATTATGTCCCTGAAATTAAAATATATCACTAACAATACCTTTTATTGTTTGGTTTGGAGGAATGTTCTTGTTA
LOC106559644	13:44659997-44679208	LOC106559644L1	32:27995234-27995234	NA	NA
LOC106559647	1:103815398-103836892	LOC106559647L1	4:6956712-6956728	NA	NA
LOC111090178	16:41749454-41752838	LOC111090178L1	24:30423244-30423261	NA	NA
LOC111092404	25:11997020-11998742	LOC111092404L1	30:16586781-16586795	CAGAGCGGAGGCGCTAAGCCATAGCGCGAGGCACGCGGGCGGACCAATAATATTTTTTGAAGAGAAAAACCAAACTCTCTGATGGGCCAGATTCTAAAGATGTGACTCTGACCTTTGATTCAGGCATGGAGAGTTTTGTCAAATTAAGACAAAGTGCTGTTCTTA	AAAAAAAAAAAAAAAAAAAAAAAACAAAAAAAAACAAAAACAACAAAAAAAAATATTATTGAATGATTCCTACATATGGGTCATTGAGGTAGGATACTGGTGAATAAAACAGATAAGGTTAGGATCCTTGAATGTTTAGGGGCAGGAGGTGAGGGGATTGGCAAGTAAGTTGGTGATTAGTGAGAGAAATGCTGTAAGGGAGCATATAGAGGGAGCACCT
LOC111092520	26:4158751-4183118	LOC111092520L1	1:116079034-116079049	TACTATTGAGTTGTAAGCATTCTTCGTACTAAGTTTTGGCTTTAGGAAATGTGAGTCCTCCATCTTTGTTCTTTTTCAAGATTATTTTAGCTATTCTAAGTCTCTTGTATTCCGATATAAATTTTCATATCAGCTTTTCAATTGAAAAGGAAGCCAGAGTTGCGGGGATCGGAGCGGCAGCAGCCGCGGAGCCGCGGGAGTGGGGAC	AAAAAAAAAAAAAAAAAAAGAAAAGGAAGCCAGATGAGATTTTCATAGGGATTGCACTGAATGTGTAGATCAATTTGGGAAATGATTCCCCTCTAACAATATTGTTCTGAACCATGCTGCAATGAACTTGGGGGTGCATATATCTTTTCCGGTTAGTGTTTTCATGCTCTTCA
LOC111093524	31:20974380-21051965	LOC111093524L1	9:53490304-53490320	ACTGTACAGCAGCAGAGAGGAGGCCTGTTCACTCTGCTCAGCCTCTTTGGGACCCCCACCCGCTTCTCCCTACACTCCCCCTCCTCCTGGGCTCCCGGGGATGGTGACCTTGCTGGGTAGGGGGTGAGGTCCGGTGCCAGACGATAGCAAAGCATGGATCCGGGAGAGGGAACATTAAGTGCAAAGCCTTGAGCAAGGGCTTGCCTGCTCTGATCAAAGAAGGGTTATGGGGCCAGTTTAGTTAAGGTGGAATGACAAGGGGGAAGTAGGAGGAAACATGGTCAGAGAAGTAATGAGGACCAGATAACATAGGTCCCCATATATCATGCCACAAGACTGAGTTCAACCGGAGGAAGCATGTAGATAAAAGAGAGAAGCAGCTCAGGAGCACTCCAGAAT…	ATTTATCCTCAGTAAAGGAAAAATATATCCAATAATAAACTTAAAAAAAAAAAAAAAAAAAAAAAGCATGGATCCGGGGACATGGGGGGTGTGGGGCGATGTAATCAGTGTTAGCTGCTGCTGCTCACAGAACCCAACACCACCCCACCCTGGTCATAAACGCTCTCTGCTCATGA
LOC111093824	34:30468672-30572510	LOC111093824L1	4:73323363-73323379	NA	NA
LOC111094952	X:91816291-91838953	LOC111094952L1	3:67013820-67013820	NA	NA
LOC111097575	10:437459-438753	LOC111097575L1	6:55528829-55528845	TCTTCAGCTAAGACAGCAGAAGAGATGATTTATTGTACACGTTACATTCAGCCACAAACGAAAACAGAATTAGTCCCGAAAGTAACAGGTCCAGGGCAAAGGACCAAGGAGGGACGGTTTGGGGATGATCAAGTCCGGTCTCTCAAAGGTGGTCGTCGCGATCAGATGGCGATGGATGTTCTAGATCCACTGTATCAAGCTCTAGAAAGGAGGCATGCAGTCCAACAACTGGTCCCAGCGTCCCTGGCCTCTGGCTTCCCTGATCTCTGCTCCCGTGGCTCCATGCGTGCACAAGCTAGCTGTTTACTTGGACCTCTGCCTCATCTTTCTTCTTTTACGCTTCAGCCTGCGCATTCGCTTCTTCCTCCACTTGGCTCTCATGGCGCAGAGGTCTCCGGG…	AAAAAAAAAAAAAAAAAAAAAAAAATTATAGTGTAACCTATGTAAGCAATAAGTTCTATTTTTTCAAAGGCTATTTACATCATGGAGAAAGTTTTGTAACTTGAGAAAAGTTGGATATTCAGTATGATCCCCCAAATTACTTAGAAGACAGAAAGAAAAAGCAAATTGGTAAGTGTTCACAGTTTGTGGCAGAGTGATTGGAGTTTATTATTTTATTTTAAAATCTTGTATTCCAAGTTTTCT
LOC111097575	10:437459-438753	LOC111097575L2	8:44056703-44056719	AAAATATCTATTAATTAACCATACAACCTTCTGTTTAGATACCTAGTCCTAGCTCCTCATTTACTTCTTAGGAGGCAGTACAGCATACTGATTAAGAGTAGGGGCTCCAGCTCTCGGCGTTAGCGCCATCTTCCCGGAGACCTCTGCGCCATGAGAGCCAAGTGGAGGA	AAAAAAAAAAAAAAAAAAAAAAAAAAAAAGAGTAGGGGCTCCAAATTCAGACAGATCAGTTTTAGTCCTCTGCCACCTACCAGTTGTGTGACCTTGGGCAAGCTGTTTGACCTCACCAAGACTCAGCTTCCTTAGCAGCAAAGTAGTTATAATAAT
LOC111098057	11:36490956-36499449	LOC111098057L1	5:27645874-27645875	AATTAGTTGTATCAACAGAGATTAAGATTTTGGATGATCAAAAACAGAACACATTCTTTTCATAGTTTAAGACAATGAAAGCCTTATAGAATATGTTTTGTTACTCATCTGATTATATTTGGGCTTTGGCTGGACGCTGACCAGAGGCTGAGCAGGCGAAGGCCACGCACAGGCTGGCGGCG	AAAAAAAAAAAAAAAGTAAGATTAAAAAAAATGAAAAAGTAAGGTAAAAAAAAAAAAAAAAAAAATAAAGTCAGGGGAAGGAATTAATGCAATTTTTTCAAAAAATGAATTAAAAATACCTGGCAA
LOC111098057	11:36490956-36499449	LOC111098057L2	11:34053244-34053261	GAAAATTTTACCTTAACTATTTACTTGCTGTTTGATTTCACACAGTTTTCTTAAATCCTTAGTAGATTCAATTTCCTTTTGAGTTAAATGTGACTATTGGTGTTCATCCCATGGTTATATTAAGGTTAAATGAAATTACTTAAATGAGAACAGTTAGCATAAGGCCCAGCATAAGGCTAATGACTTGCTGCCATGTGCCAGGCATGGGGCAATGTCCTTAAAAGAGGGCAGC	TTTTTTAAAAAAAAAAAAAAAAAAAAAAAAAAAAAAAAAAAAAAAAAAAGGCTAATGACTTGCAATATTTACTATATTTTCATTCTCTCCCTAATTTGGTAATGCTATATTGTATTAGA
LOC111098057	11:36490956-36499449	LOC111098057L3	22:4500976-4500990	CTAGGTCTGGATTATGTGGGCATCTACTGCAAGCCAACTTTCCAGATAACATAACTATTTCTGCACACATGCTCTAGACCAGAGTCTCTGTAATGAGGTGTCACATGTGAGACTCATTCTCCAAGCTTTCAGGAAGAATCACTACAAAATATGTCCCTTTTAAAGCAAATGGAAAGGGCGAAAGATTTATACGATCTGAAGAGAAACCAGAGCCAGGCATGGGGCAATGTCCTTAAAAGAGGGCAGCATCCTTCACATCCAAATGACG	AAAAAAAAAAAAAAAAAAAAAAAAAAAAAATAAAGCAAATGGAAGAAAGGATGTGATCCTTCAAAGATGAGGTTCAGTAATATGAGGCAAAGATTATTTTTTCTTTTTTTTTAGGATTTATTTACTTTGGGGGGCTGACAGGCAGAAAGAGAGGGAGAGAAAGAATTTCAAGTAGACTCCTCACTGAGCATGGAGCCCAAAGTGGGCTCAATCTCATGAC
LOC111098057	11:36490956-36499449	LOC111098057L4	26:25826742-25826742	NA	NA
LOC111098057	11:36490956-36499449	LOC111098057L5	X:44908313-44908328	CCAGCGGCTCCACCTACTTCACACAGCAGAGTCCAGTCCTGAGTGAGGAGCCCAGCATTCCTTGGCATTTACCATTGTTTTGCTGGGTTGGGGGTGGGGGGGTGGGGTGGGGGGGGGGGGGGGGGGGGGGGGCGGGGGGGGGGTG	AAAAAAAAAAAAATGCCAAGGAATGGATGTCTTGAGTCTTCCTCTCTCAATACCCCAAGGTCTTTACCAAGTACTTGAGCACGTACTTGAGCACTCTAGATTCAACCACCATAGGCTGTGAACATCTCAAACAGTCTACAAGTAGTGTTTAAAAGCAAAGTATTTCATTTCAGGATGGTTACAGTGCATGGTTATGC
LOC111098614	13:45476481-45479196	LOC111098614L1	3:80777083-80777098	CGGCCCCGCTCGCGTCCGACACCCGGGCCGCCCCGAGCCCTCCGGAGCCGCCGGCCTGGCCGGACTCCCCCACAATATGAGTTTGAATAAGGTTTTACCCAATGTGCATAAAATGAGACTCCTGGAAATAGAGGTCATGTTAGGAAATGCTTCTTGTATATCTTTAACTTAGAGAAAATATGTTCATCTGTAACAGAATTCATATCTGGCAAGAAGATTTGCCTGATTTAATAGATTACTTTATAATTAGGAAATTCAAAGAGGAATATGATATAAAAATGATAAAGTAAATAGACATAAACTAATAGGAAAG	AAAAAAAAAAAAAAAATAAAAGTATATAAAAAAAAAAAAAAAAAAAAAAAAAAAAAAAAAAAAAAAAAAAAACAAACTCATATTGTGAATTTTATTATAACTTCAAATTCTCTCATTTTGATTATCAATTATAACAGATGAATGCTTACAAAAACTCAAAAGAAACTAGATTTATC
LOC111098614	13:45476481-45479196	LOC111098614L2	13:15707962-15707981	GAAACACTGTTCACTTATTAACTTGTTTTAGTAAACCTAGCATGTGACCATAAAACATTAAATAGTTTTTTGTTCAGCTTAAAAACTTTTATTTCTGAAAAGAAAGAAAAGAATCCAGAAGAGAGGGGAGTCCGGACAGGTTGAAAGCTACAGGTAGCAGCCGTGGAAGCTGGAATATT	TGGGATCCATTTGCCTTGTAAACTCCAAAAAAAAAAAAAAAAAAAAAAAAAGAATCCAAAAGAGATTAAAAAGAAGGAAAGCTGGATTTTATGAAACAGTT
LOC474791	11:60715223-60729186	LOC474791L1	31:1984451-1984465	AAAATAAAATACTTCAAGTGGTTAAGTGACTTGCTCAAGTCCACCCTGGTCACAGATATTCACAGATTTATAATTCAAATCTACTTTTGGGGCCCCGAGGCCCGCCCCTGCCGCCTTCGG	AAAAAAAAAAAAAAAAAAAAAAAAAAAAAATCTACTTTTGTATTTCTCTTTCTAATGCACCACAAAACTTTTGGTGCCCAGAGTGTGACAGCATACGAATTATACCTGAACAAAAACGCAGATCTTGATGATTAACTAGATGACTTTCTATAAAATAGATGGCAGGAGAGAAATAGCTATTGTGTAATTAACATCCATTATGCATTAGGTCA
LOC475916	9:4805655-4808076	LOC475916L1	1:108228077-108228091	NA	NA
LOC475916	9:4805655-4808076	LOC475916L2	4:61640710-61640726	GAGCAAAGAAAAGAAGACCCGCCAACGAACGACCAAACCACTCTATCGAAAACAAGCATTTCTAGAAATAACAAAAAGTTTAAGTCTGCCAATCCATAGAATGTTAAAGACAATTCATTACTGTTTACTTCT	TTTGGCTTCCTTTTACTGAGGAATTAAAAGTATTTGGATCTATTAGTAAACATGCTTTGTGCCTGAGAAAATTATTATGAGAAAACAAGCGAATTGTCTT
LOC475916	9:4805655-4808076	LOC475916L3	13:49468981-49468994	AGCAAAGAAAAGAAGACCCGCCAACGAACGACCAAACCGCTCTATGCTCTATTTCTTCTTTAAATGTTTGGTAGAACTCCCCTGGAAAGCCATCTGGCCCTAGACTTTTTTGTGTGTGAGGTTTTTGATGACTCCTTCAATTTCCTTGCTGGTTATTGGTCTGTTCAGATTGTCTATTTCAGTTTTGGTAGT	CCTCAAAAAACGAATTTGGAAATTTTCCTTCCGTTTCTATTTTTGGAAACAACTTCAGTAGAGTAGGTATTATTTCTTCTTTATTTTTTTTTTTTTTTTTTTTTTTTTTTTTTTTTTTTTTTTTTTT
LOC476206	1:25836409-25839148	LOC476206L1	13:52363426-52363437	AGGAGCTTCCGCCTCCGCGCGACTCGGCGGCGGCAGAGAAAGAGCTATAAATACACTCTTAAATGCCCTTTTGAATTGACATTTTAGATAGATTATTTTTCATTGATGCTCACTTAGGTGTTGAAGAATAACTGCCCT	AAAAAAAAAAAACTTGGTTTTTTTTCCTAAAAAAAAAAAAAAAAAAAAAAAAGAGTGTATTTATAGTTAATCCACTCTTATGGACACTTTAGGATAGACCACTATCAAAAATCAATAGATCAACCACTTATTTTATTGATAAGATAATAAATTAATAAAACTTCCTCTCTTTGTATAAAAATTCTAATAATCTCTCTTATACATATTTGTTTACTTGCC
LOC476206	1:25836409-25839148	LOC476206L2	37:28519756-28519775	CTTGACCGCACAGGAGCTTCCGCCTCCGCGCGACTCGGCGGCGGCAGAGAAAGAGAGTCATTTTTCTATTTTTTCTATATTTTTTCTCAGTTGCTTATGGATTCTTTGTACTATCACAAAAATGGCTCTTTTCCCATAGTATGTATGGCAATTTTTCCCATTTTATCTCCTTACTTTGATGTTATTTTTGCCATGCAGAACTTTAAAATTTTAAACAGTCATGTTTAGCAATGTTTTTCCATTCCGGACT	AAAATAAAAAAAAAAAAAATGGGTTTTTTTTTCCCAAAAAAAAAAAAAAAAAAAAAAAAAAGAAAAAATAGAAAAATGAGCAAAGGAAAATGATAAAAGAGTTCCTAACAAAGGAGTCAAATTAGGGCAATAAACCCTTATATTTATAAAGAAGCAAGTAAAGTCCTGAGATGCCCTTTTCACCTATCAAATAGGCAAATATTTAAAATATTGTTAGTGCTTAGTTTCAGAATTGAGTAGGAAAGGAGTTTCAT
LOC477508	26:16346760-16349042	LOC477508L1	27:1755458-1755458	TTCATGATCCATTCTGTTCTTCAATTTAAAAAGCTCTCAGAGAATCATTAAGCTATTTAGAAGCACTTTAAAAGGAAAACTAGGAGGCTGTCCAGGTCGATAATGGCGTCGGCGGCGGCTGTGTTCCGGCTC	GAGGCAGTAGAAAAGGAAAACGACGCAGGGGGGGGTGCCCGGGTGGCTCAGTTGGTTGAGCAGCCAACTCTTGATTTAGGCTCATGTCATGATCTCAGGGTCCTGAGATTGAGCCCTGCA
LOC478720	35:10454501-10462296	LOC478720L1	5:85980339-85980354	TTGAGACAGCTGATAAGCACCCAGGCCTGCTAAACTACCAAAAAACAGCCCAGCAGCCAGTGATGGGACACTACCTGCTTTCGCATAGCCAATGATCCCACCAGAAGCAACCAGTGCCGCATAGCCAAAGCCAATCCAATGTATAGGCACTAGTGGGCCAGAGTCCTTCTGCATCGTTCTCCTTCACTCTGACCAGACAGCAGAGTACGAGGCCTGCACCGAACCGCTGCGCGGCGGCCTGCACCGGGCGACGAGGGCGCGCAGACGTGAGACGCGAGCGACGGTCCCGCCGGAAACCTCTATTCATCTTTGAATGCTGGAAGGCTGACTTGTTAGATTATATTGACTAGATATTCTTGTCCTTGGCTTCCTGTGAGATTCGGCCAATGGGAGCCACTG…	AAAAAAAAAAAAAAAAAAAAAAAAAAAAAACAAAGATGAATAGAGAAGGATAGAAGAAGTTCTGAAAGAAGTCAGGTTAAGCATATGAAGAGTAGATGGCTCCTAAATGAAACAATGGCATCAATAGACCAAAAACAAACAAAACTCCTTGAATATTTTAGCTTTTTTTTTTTCACATATGCATTGCTTCTCTTAAACTGTGTGTGTTAAGATAAACAATATATCATTCTCCGATACTGGGATGCAAACAGAAACATGGCGATTGAAGCTCGCACTTTCCCTCTCCCAT
LOC478720	35:10454501-10462296	LOC478720L2	11:26893461-26893479	CATAGTGAATATCATTCCAAATAGGGAAAAACTGAGAGCTTTCCCCTAATGTCAGGAACACGACAGGGAGGTCCACTCCCACCACTATTATTCAACATAGCACTAGAAGTCCTAGCCTCAGCAATCAGACAACAAAAAGAAATAAAGGCATTCAAACTGGCAAAGAAGTCAAACTCTCGATGTCTGCGCGCCCTCGTCGCCTGGTGCAGGCCGCCGCGCAGCGGTTCGGTGCAG	TTCTGTTCTTTGGCTCATTTTAGAGCACAGACCTACCTGGAAAGAATGTCAAATGAAATATTGAAAATAAAGTTTACTGTAAGTAAAAAAAAAAAAAAAAAAAAAGAAGTCAAACTCTCACTTCCCAGATGACACGGTACTCTAGGTGGAAAATCCAAAAGACTCCACCCCCAAATTGCTAGAACTCACAGAGGAATTTAGCAAATTGGCAGTATACAAAATCAATGCAGAGAAATCAATTGCATTTCTATACACTAACAATGAGACAGAACAAAGGGAAATTAAGG
LOC478720	35:10454501-10462296	LOC478720L3	27:30314774-30314790	CATCAGAATGGCTAAAATCAACATCTGACAATATCAATAGATACAAATGTTAATTGTAACTTCTTCATAGAAATTAAAAACTATAAATAGTCCACATACTCATGAAGAATAGAATGGATAGATAAGTCATGACATATTTATGCAATAGGATTCCATACCACAGGCAGAGCGTGCGGCGGCGTTTCCGGCGGGACCGTCGCTCGCGTCTCACG	GAGGTAACTTCTATTCTAACTTTAATGCAATAAATTAATTTGAACTACATATGGACTCTACAAGTGGAGTCAGTATTTACTTTTTTGTGTCTCTTTTATTTGGCATAACATTTTGGAGATTCATCCATGCCATTATATGTTCATGCTTTTGTATTGTGGTATGGAATCCTTTTTTTTTTTTTTTTTTTTTTTTTTTTAAAAA
LOC478720	35:10454501-10462296	LOC478720L4	29:13805579-13805596	NA	NA
LOC479815	6:23627782-23653625	LOC479815L1	11:28439427-28439442	ATTGCTCTGCTCCACAGGACCCGCCGGCTTGAAGCTGGACAAATAATCTAAGTAGAAGATCAACAAAGAAACAAGGGTTTTGAATGACACATTGGACCCGATGGACTTAACAGACATATTC	ATTATATAAATCATTTAATAACAAACTTAAAGAAACTCATAGATAGTAATACAATAATAGTAGGGGACTTTAACTCCCCACTCATAGCAATGGACAAATACGCTTTCTCAATAGATGATGA
LOC479815	6:23627782-23653625	LOC479815L2	14:14297234-14297248	TCCAACCGCCACCCCTTTCTACTTATATAGTCTTGTTTCTTGACTTATTCATGCTCTTTATTTATTCACAGTCTTTAAGCTCTATGGCCAGTATTTTCTACTCTGCTCAGTGCTGAGAATCCACATACTGTATTTCCCAGACTTTCTTGCCTGCTGACTTCCTACTGTGCTATTAAAAGGATGGTAAGGGCCACCATCTTGCTTTCCTTCAAGCCGGCGGGTCC	CTGGAAAAAGCTGAGGGCTGGACCAGCAAATTTGCTGGTGGGCAATGCTGCCTAGAAACTGAAAAATGGGAAGGAATGCTTTTTTCTTCTCTCCTGACCTTTTACCATCCTTTTATTTTTATTTTTTTTTTTTTTTTTTTTTTTTTTTTAAATTTAAAAAAAATGTTTTTTTGATTTTAAGTCATTTGGGAAAAAAAACCTTTTTT
LOC479815	6:23627782-23653625	LOC479815L3	25:26641410-26641425	GCGTGATCTGAGGTCCTGGGATGGAGTCCCACATCGGGCTCCCTCCATGGAACCTGTTTATCCCTCTGCCTTTGTCTCTGCCTCTCTCTCCCTGTGTCTCTCCTGAATAAATGAGTAAAATCTTAAAAATAAAAAATCGGCCACCATCTTGCTTTCCTTCAAGCCGGCGGGTCCTGTGGAGCAG	ATAAAGTATTTATTATATGCTGAAAAAAAAAATAAAAAATAAAAATAAATAAAAATAAAAAATCTTAAAAATAAATAATTTGGTTGAGGAGAAAGGGAGGCAAAGTCTAATGACCACACAGGTGAGAAGTCTACCTGGAGACCTTTGTTTATAAACCTGGGACCCTGAAAGTCACACCTAATTGGGTAATCCAGGAGGAAAACATCATTTTTCTCTTGAGA
LOC479901	6:40613504-40626068	LOC479901L1	32:26587696-26587712	CACGCAGGAGCCTCTGCGTCCCAATGACCCGGACCGGGCGCTCCGTCCGAGGCGGGAGCCGAAAGTTTTCTTTTAGATTTAGAAAGAATCTTAGGGATTATCAGTCCTACTTTTATTCTTCACACATTCACTAATATGGGAAAATACCTTAAGAGTTTTAAAAGAAAAATAAAACTCTTTCTTATCAGGGGTTACGATAATAAGAGGTTTAATTGATCTCTTTACAAATGTTTTAATTTCTTTGAGAACATTAGACAGCA	GCTTTTAATAAAATTTGTTGGCTAAGATTACCAAAAAAAAAAAAATAAAAATAAAAGAAAACTTTCATGCCTGCAGAATACTAAGAACTAATTTTCAAAATCATAATAAATCAAGAGCCCATACTATATATAAAAACCTATAGATACAGATTTAAGCATATACAAATTATTATGCTATTTCCTGCCAAAACACAATTGTTTTCATTTTTGAATATATGTGTTTTCAAATCAAGAGAAAAAGGTAAAGAACTATAAAATGCTCTCA
LOC479912	6:42201697-42207886	LOC479912L1	20:14194521-14194536	AAAAAAGGCATTAGTCTGTTCTTATCAAGACAAGTAGGCAAATGTTTCCATTTAAGCTTAAATCAGTTTGAGATAGAATGAGACCTCCTTATGATGAGCATATAGAAGGAGGAAGGTAGGAAGTAAAAAATGAATAAATAAATCCAGGATGAGTCTAAGGTAGTAGATACAAGAAAAATACTTGCCCTCCACTCAGCGCAAAAATCCGGCACCATGGTCATGATCTTCGC	ATCCCCAGTAAAGCCTTGAGCACTAAAAAAAAAAAGAAAAAAAAGAAAAAAAAAAAGAAAAATACTTGTGCTGTCTCGTTCTCTTTTCATGTAAATTTCTGGCAGAACTCAAACTTCTCTGGAAAAGGCAAAGAACTAGGAATAAAAAAAATCTGATAATCATATATATATGGCCACTACTCCAGTAGGAAAATTTGTTGGTTTTAAG
LOC480934	X:46502459-46510990	LOC480934L1	32:1292581-1292596	NA	NA
LOC481650	11:60746428-60758009	LOC481650L1	31:1984452-1984465	AAAAAAAAAAAAAAAAAAAAAAAAAAAAAAAATCTACTTTTGTATTTCTCTTTCTAATGCACCACAAAACTTTTGGTGCCCAGAGTGTGACAGCATACGAATTATACCTGAACAAAAACGCAAATCTTGATGATTAACTAGATGACTTTCTATAAAATAGATGGCAGGAG	CCACCCTGGTCACAGATATTCACAGATTTATAATTCAAATCTACTTTTGCCCGTTTACATTCCCACCAACAGTGCATGAAAGTTCCATTTTCATC
LOC484356	1:106044100-106050204	LOC484356L1	21:7272401-7272401	NA	NA
LOC484356	1:106044100-106050204	LOC484356L2	X:38426928-38426943	AGTGGGTGGTCCCTCAGCTTGAAGATACACCAGCCCCTCACTCGCTCCAAAGCCGGATTCTTTGATGTTAACACACATGAGCCACCTTGGCACAAATGCCTTGGTGGTGTGGAAAGACTAAGATTCATTTTTTACATCCTTTTCTCCCTCTCTGCCTTCAGCATAGATTTGACTCCTTTAAGCCCAGAGGCCTGTTGGAACCTGACCCCAAGACATGGTTCCCAGTATGTCAGGCAATCTGGAAT	AAAAAAATTAAAGCTGCGTTAACCAGCACCCAGAACACTTCGTTGTTGTTTTGGGGGAAGAGTGTATTGTTACTAATAGAATATCTCTGGAGCTAGATGATACAAGGGGAAAAACATTTTTCCCTTCTAGTTTCAAGAAACTTCCTCTTGGTTCTCAGGAAGGGGGATTCTTTGATGTTTTTTTTTTTTTTTTTTTTTTTTCCCCCACCACAAAGCTCCCCGTTTTTTATTTGTGCAAAGTGCCCTACCTGGGCCC
LOC486776	28:1767224-1800922	LOC486776L1	5:47198965-47198980	TCCAAATGCAGCCCCTGTCATACAACATCCTCCACTGGTAAAGAAGGCCAGTTCAAATCTGCCCCGGGTTTTATTAGCTCCAGTGGGTAAAATAAACTCATCAGTATCCTGCACCAGGTATCGTGGATCCACATTTAAATAAGGAGACAGAGGGTTCATACCAGTCAGCGGGACTCCGGCCAAATCCGCGTGCGAGTAACTTGCCCCGCCCGCGCCGAAAAAGCCGGCCAAGCCCCCGGTGGTTTTGTTCCCGCTTCCCCCGCCGCTCTCCATGGTGTCGCAGGAAACTGCCCGTCTGCTTATCACCACCGCCTTAGGCCGGGTTCGTCTGCTCGGCCGTTGCTCCCCTGAAACAGCAGGGCGACCCGGGTTACCAACAGAAGAGTTCCTAATGTTTCT…	GTTTGCTGTGGTAAAGATCATGTATGGTTGACCAGGACTGGCATCCTGCTAGCCAGAGCGGAAGCCCAAACTCCTCTGGTGGCTGAGTAATGTGGTTCTTCCCTACCCTCTGAACTGAAAAACTACTTATAGGATTCAGGTCATGATTGTTGTCTATACCGTATCCCCACATTTATTTAATGATCTGAAACTGTAATGTTGCCTTGTATTTCCAATAAATGGTGAAAATAGAAAAAAAGAAAAAAAAGGAACTCTTCTGTTAAAAAAACAAAATTCAACTGAGTAAATTTGAAGATCTAAATGGCTTTATTAAACAGCTCATGAATCAGGTAGCACCCCAACTAGACAATACTGGGATGGTCTCGAGAAGAATTTTAAAAATTTTGAACAGTTCAAGAG…
LOC486776	28:1767224-1800922	LOC486776L2	7:23682997-23683015	CATCCCTGGGTCCCTGTCACATGTGAACTCCCTAAGGGTGGAGCCTCTTTCTCCTTGGGCCTTATGTGCCCAGGCACCTGGTACTGTGTTCTACTGAATTAGTGGCTCAAAGAAAAGAATATGTCCAGGTCACCGTGTGGAGGAGGAAGGGGTAACCCGGGTCACCCTGCTGTTTCAGGG	AAAAAAAAAAAAAAAAAAAAAAAAAAAAAAGAAAAGAATATGTCCCCTGCATTAGCATCATTGCCTCTGCTCAATCACACAGTCCCTGATTTTGAGACCACTTGACTCTTCATTTCATTGAATAAGTGGCTATCTTTGAAGAGATTTAAAAAAAAAAAAAAAAAACCCTCTCAGTTCCAGTCT
LOC486776	28:1767224-1800922	LOC486776L3	12:61426267-61426285	CTCATCCATGGTTGAGTAATAAAAGATAGTCACTATTGAAATCTAAAAGTTAAATGAGTCCAAGGTAAAAAAACAGCACACATTTAAGACATCATTAGTATCGGAGAAATTCTTCAGGAGAAACCTATAAAACTCAAAGATATTAAATAGATTTATTGCCTCTGGCTTTAAACCAAAGGGAGAATATCAGTTACACACTGTGCCCAGATACTTTATAAAGGGCATCTGCGTTGCTTGGATATCATCAATCCATCAACTAAAAATACATGATCAGCCGGAAGGTCACCGTATGGGGGAGGAAGGGGTAACCCGGGT	ATGATCTGAAACTGTAATGTTGCCTTTTTTTTCCAAAAAAGGGGTAAAAAAAAAAAAAAAAAAAAAAAAAAAAAAAAAAAAAATAAAAATCCATGATCAGATTCCCTCTTTAGTTAATTCTTCTCTAAGTCTTCTTCACTGAAAGGGAGATAGTATAGGGAAGAGGGCCATTGGT
LOC487290	2:65305210-65356776	LOC487290L1	15:41787269-41787285	NA	NA
LOC606856	25:309450-473813	LOC606856L1	19:49257759-49257825	NA	NA
LOC607049	2:35758981-35761529	LOC607049L1	7:43758499-43758514	TGCTAAAAGTATTGTCTCATTTAAAAAATTAATGTTGGGGCATCCAGGTGGCTCAGTGGTTGAGCATCTGCCTTTGGCTCAGGTCTTGTTCCGGGGTCCTGGGATCAAGTCCTGCATCGGGCTCCCCACAGGGAGCCTGCCTCTCCTCTGCTATGTCTTTACCTCTGCTGTGTCTCTGCCTCTCCCTGTGTGTCTCTTATGAATAAATAAATAAAATAAAAACATCTTTAAAACTAAAAAAAAAATTAGACAAGTTCGCCGGGGAAGATGGCGGATGACAAGGATTCTCTGCCCAAGCTTAAGGACCTGGCAT	AAAAAAATGAGGGGAGAGAGATTCAAAAATTAAAAAAAAAAAAAAAAAAAAAAAAAAAAAAAAAAACTAAAAAAAAATTAATGTCACCTTGAAGGCTATATCAAAAGAAACAAAAACTCAGAGAAATATTTGCAAAGGAATGACCAGTCTAATTGATTTCAAAATTTAAAAACCCAATTATAAATC
LOC608308	17:21545586-21564681	LOC608308L1	32:28465101-28465117	NA	NA
LOC608455	20:40507767-40515854	LOC608455L1	3:54095285-54095300	AGACTCCAGGGCAAAGAAAATTACCAGGGCAAAATTGTGAATTATATAATAAGAAAAGGATCCACTTAAGAAAACATAATAAAAAAATGTGTTTGCCTCTAACAACGAGCTTCAAAATAGATGAAGAACTGGAGGGAGCTGGAAGATGGCGGCTTCCGCGGTTTGCCGGGCGGCGGGCGCCGGGACGAGGGTGCTGCTGCGCACCCGC	AAACAGCCCACCCCAGCCTACAAGCCACCTGTCGAAATAACATCACCCCCAAAAAATATCTTTTGAAAAAAAAAAAAAAAAAAAAAAAAAAAAAAAAAAGATGAAGAACTGGAAGGAGAAACAGACAAATCAGCCATTATAGCTGGACACTTTGACATTCTTTCAGTAACATCTTGAGCTAATAGACTGAAAATCAGTAAGAATAAGAATAGAAAAGAGCTGAACAGCATTATCAACCAAC
LOC610012	2:71914693-71917976	LOC610012L1	12:7199651-7199665	NA	NA
LOC610091	22:18330257-18365788	LOC610091L1	19:11826743-11826757	NA	NA
LOC610091	22:18330257-18365788	LOC610091L2	X:13374421-13374437	NA	NA
LOC610164	31:31316573-31321413	LOC610164L1	24:23423989-23424000	ACATAAAGTTGCAATGTCAGGTACCTAGCACATCCCAGATACTACACACTCCCCTGCAGGTAACCACTATCCTGAGTTTAGGTAAAGTCTCATGCATTTTACTACTTTTACTACATATGTCTACATCGTTAAACTTTTTTTTTTTTCGTTAAACGTTTTATAGAATTCTTCCTATATTTAAGACCTTTAGCCTTGCAGGTGCGCCCCGGCCGCAGCCATGTCTGCAGCCTCCCGCGTGGCGCTGGTGACCGGGGCCAACAAGGGCATCGGCTTCGCCATCGCGCGCGAGCTGTGCCGGCAGTTCTCGGGG	AAAAAAAAAAAAAAAAAAAAAAAAAAAGACCTTTATATAAATAGTACCATACTAAAATAAATAAGTAAATAAATAAATAAATAGTACCACTGTACTTAGCCTTCTGAAACTTGCTTTCTTCTGTCAATAAACATTTCTATGAATCGTGTGTAGTTTTAATGTATTTATTTTTGCTTTTACTGCCGGATAGTATTTTA
LOC610304	12:20404178-20423639	LOC610304L1	13:40913379-40913395	GGCTGCTGCTGGCTTATTTTTCAAATCAGAACAGAAAATCCAAAGTGAGTATTTTAATGATATAATGAACCTATGAGATACAAGAATGATTCCGAGATTTCTATTAAACAATTCTAATTATTAATATGATTTTA	TGTCAAAAAATAAATAAGTATTTTGCTAAGGTTAAGACCAAAGTGAGTATTTTTTTTTTTTTTTTTTTTTTT
LOC610615	26:6120500-6190147	LOC610615L1	31:38476091-38476107	NA	NA
LPCAT3	27:38028438-38068854	LPCAT3L1	2:74108129-74108129	NA	NA
LRR1	8:26229293-26241617	LRR1L1	2:1051307-1051323	GGCAGCTGCCGACTCACTACCTCCACCTCACAGTGTAGCTTCATGTCGCGGGAGCGGCGGCCACAGTCCTCATTTTTAAATGACAGTAGCACTACATACCCCACGACTACAAGTGACTGGCTCATAATGGACTTTAAAAATATTTGTTTTATTTTTTCAATTTATTATTCACAGCATCAAAACAACTCATCTCAGGGAAATGATGAATCTTATGTAGAAAAAGTAATTATTTTATTGCCTTTCATTTTTTTAACTATTTGCTTTAGCAAATTACAGAGGGACTTATAAAAGA	GTTCAGACACCAGGACTGCCGCTTGTTAGTGGATCACTCAAATTCTGAGTGAACGATTTAACCACTCTTGAACCTAACAGTCCTCATTTTTATTTTTTTTTTTTTTTTTTTTTTTTTTTTTTTTTTTTTTATTATT
LRRC40	6:75515694-75564765	LRRC40L1	4:64503488-64503488	NA	NA
LRRC41	15:14092739-14111034	LRRC41L1	9:17672963-17672980	CCGCCTCCCGGGACGTGGCCTCCATGGTCGTTGCCGCCGCTACCTCTAAAATATTTTTAAATACATGAAACATGACTGATTACTTAACTATATCAATTTAATTTCAGATGAATATTATTTTTCACAAAGAAGAGTTTGCAAGTATCCTAGACATTTTCATTCATTTATATCTCTAAAAATACTTTAAATAATCCTTTATAATGTATTGGGCAATAATCTCAGCTCTAGA	AAAAAAAAAAAAAAAAAAAAAAAAAAAAAATAAAAATATTTTAGAGTCAGAAGATCCTCAAAAAACAGGAAATCCTTGTATATGAAAATTTTCAGGGCCAACAGATACCTCCTGAAGAGGCTTAATTAAAGGGTGCCTATTCAAGTTGATCTGTGGCCCTCAGCAGTACA
LRRC49	30:34580906-34737181	LRRC49L1	17:50434030-50434046	GCCAGATTAATATGATCACCAGATACAGTTGGGCCAGCACTATGACAGCCCTGCCGGATTCTGGACTTTGAAGGTGTCTGAATGGAAGAATCTCCAAAGGCTGACAAGGAGCTCATGGTAGTTTTCATTTCCAGCCCACATAGTTCTGTCACGTTTGTTGTGGATGAGATGCATGATGATTTATTACGAGGCGAAGGGCTTATTACTCTTCCATCTCCTTGCCTACTTGAGTAGTTTCTTTCAAGATCATGTTGTAAGAGTCGACCAGAGAATGATGGCGTTTCTTTATTTAGCTTGAATTCAACTTTGCTTTTCTCAGGAAGCGATGATGTCTGAATAACCAGGTGGAGCCCACAGTTCACGTTGTTCGCAGCCCGGCCAGAGACAGAGCGGTACTTG…	CTGGTATCATTTTCTCAGGTACACATCTCTGAATCAATATATTATGCAAAAGTTTCTTCAGAAATTTACCGATTGCATGGCTTCGTCCCTGCCCCACTTCCCAAATCCTTACCAGTTCTTTTTTTTTTTACCAGTTCTTTTTATTTTTTTTTTTTTTTTTTTTTTTTTTTTTTTTTTTTTTTTTTTTTTTTTTTTTTT
LSM12	9:19306421-19328278	LSM12L1	29:199004-199017	CTATTCAAGAAAACAATAAAGACTAGTAAAACCAATCTGATTAATCAGAATCTATGCTAATAATGGCCTTTTGACATTTTCTTTTAAACAAAGAAACTGAAAAATCCATTAAAAAAAAGAATAAAAAAAGAATATTTTAATTATGCAGCAACAAAAAGGTCTCTCCTTTTCCTAAAGAAACCCAATGGCTACATCCTTAAAGTTTTTGTTGTTGATTTTACCTCATAACAATATCTGAGATGCTTTACTGAGGTTAAAGGAAATAAGAGGGGGGCCCGGCTTTCGCCCGCTGCTGCCGCCGCCGCCGCCGGCCGCGGCTGCTCTCCCAAGATGGCGGCTCCTCCGGGCGAGTACTTCAGCGTTGGGAGCCAGGTGTCGTGCCGGACGTGCCAGGAGCAG…	TTGCGTGCAGGTCTAGAAAAGAAACTAGAGGCCAAGTATTTAAAAAAAAAAAAAAAAAAAAAAAAAAAAAAAAAAAAAAATAAAGGAAATAAGATCCTTCTAGGTTCCAAGAGAACTGTAATGCTACATAAATAAAAATAATATAGAGATGTGGTTCTAAAAATGTAACTTTCCATAAGAGCAACCTCTATATAAGGCACAGTCTTTA
LSM14A	1:118061854-118117493	LSM14AL1	28:22025444-22025461	NA	NA
LSM14B	24:46170214-46180430	LSM14BL1	5:78313366-78313384	CCCGGAAAATGATGTACTCATAGATTTCCTCTCTCGGGGGGGCTGGCCTATCTGTGGGACGGTCTTCGGTACCAAAAGACCTCACTTTGGCGAGCGCCACGGTGGAGTTGTCGGTGTCGATGGTGTAGAGGATGCCCTCGTAGCGGATCTGCGCCTTGGAGATGAGGCTGATCTTGCTGCCCAGGTACGGGGTGCCCGACGAGCCGCTCATGGCGCCGCCCGCCCGCCCGCCTCCGCGCGGTCGCCTCGCCGCCGCCGCCGCCGCCCGCCCCGCCGCCTCGGCGCCTCCTCACCGCCGCCCGACCGGCCTGCGCGGGGACCAGCGAGCGAGCGGCGGCCTCTTTTATTATATTTTTGATTAGGAGTTTATGAAAAACATGTTGTAATAGACACAGTCTT…	AAAAAAAAAAAAAAAAAAAAAAAAAAAAAAAAAAAAAAAAAAAAAAAAAAAAAAAAATATAATAAAAGAAAAAGAAACAGTGGAAATTCACATCCAACACATTACCATTTAAGAGAACCAATTCCCAGGTGATTAGAAAAGAGCTATCTGAACTGAATAAAAGACATGATTTCTAAATTCAAAGG
LSM2	12:1270328-1279269	LSM2L1	22:35508014-35508030	CGACAGAAGCGCGCGGCTGGCTCGCAGCTCCAGGAGAGACGGCCGATTCAATGCAATCCTAATCAAGCTCTCAGCAAGTTATTTGTAGATAGTAGCAAACTAGTTTAAATGAAGAGGGGAAAAAAATCCAAAATAGGCAACACAACACTAAGGAGAAGAGCAAAATTGAAGGACAGAAACTACCCAAGTTCAAGATTCAACATAGGCTATAGT	AAGGAGAGATAGTCCACATCATGGACAGGGACAGTCAGTATTGTCAAGATGTCAGGTCTTCCTCATTTGATCTATAGATTCAATGCAATCCTTTTTTTTTTTTTTTTTTTTTTTTTTTTTTTTTTTTTTTTTTTTTT
LSM5	14:44857882-44860929	LSM5L1	10:57396262-57396262	NA	NA
LTN1	31:23942493-24008787	LTN1L1	25:37184445-37184461	CTGAGGCAGTTTGCTGATAATTGGCAAAAGATCAGGATATATGACAGGGGCCAGACCCCCACCACCTTCACGCACCACAGCTGACAGCTTTGGAAACACACTTTTTTTTGCATTTACATGAAGCCAACAGTCCTCAATAGTTGTAAGTGTATAAAGTACAGCTTCCCAGAGAGCTGGGCATACAATGGGGTCACTGTCATCAATGCTAAGTAGAACAGACGGGCTCACTTTGGATGCTTCATCTTTCATCAACTGTGGAATACGCTGGCACAAAGCAGAAACTAACTCAAAATAAGCTGAGCGGATCTGAGGTATACTGTGTTTTCCATACTTCCAAAACTTATTCTGTGATAAAAGAGACTTAAATTTCTCCTCCAGAGAATCAAGCTCATTTTCAGG…	TGGGACAGAAAGTTGCTAGGGTAGTGCTGCAAGGCTTTCCTCTGGGGAAAGGTAACAGGTCCACATACTGCTGGATACTTTAAGACTTCTTGTCTTTAGATTCACAGCCAATGGCCTAAGATAAAACACAGAAGTACTGTGTGACCAGGTATGCGGATGACCAGGCACAGAGAGGTTGAAGGCAGGGTTCTTTTTTTTTTTTTTTTTTTTTTTAAAAGCAAATGGTTTTTTTTTTTGGGGGGGGGGAGA
LXN	23:51962877-51968447	LXNL1	1:100533609-100533626	GGCGGCGGCGGCTGGGAGGGAGGGCGGGAGGGAGACGGACGGAGCCCTTTACATGAATTTTCTACTGTCTCTATTTGAGTGATGTAACTTTACAAATTACA	CATAATAAAAAGCTTCAATTACAGCCTCAAAAAAAAAAAAAAGAAAATTCATGTAAAGATAACCATGTACAATAGAGTGGATAGCAATGTAAAATATGGTGATCAGGGTTGGTCTCATAGGGGTGTGAGCAAATATTTGAGTGGTGAGGGAGTGTGTGATTTGCATTTATGGGAGGATGTTCCACACAGATGAAGTAACCAGACTAGTGCCTGAAGGAAAA
LYRM7	11:19560143-19585350	LYRM7L1	16:45238396-45238409	NA	NA
LZIC	5:63110854-63122487	LZICL1	15:60509631-60509645	CAAGGGGAAAAAAATAAAAGCAAAAAAAATAAAAAATAAAAACATTTTCCATTAAGATTCAAAAACATACTTTTATGGAACACTGCAGCAAGTACTAAAGTCACAGTTCATTATTTTACATTTTTATGTCTATTCCAAAAGTTTCAGTTATAAGTGCTTGAAAACGTGTCTTGACTTAGAGATCAAAATGGCTTCCAGAGGAAAGACAGAGAC	AAAAAAAAAAAAAAAAAAAAAAAAAAAAAAGAAAACGTGTCTTAATGGTAAAAATATCCATAATGGCTTCCATTTCAAACTCCAGAATCAGTATATTGTCTCATCAGGCAGCAAAATAAAGCTTGCTGTTATCTTAATTTTTCAACGATGTCTTTTACTTCTCACGTCTCTCTTACCTTCACCAGGATGGTGGCTCACATTTGAGGTTACAATGACGGAAAC
LZIC	5:63110854-63122487	LZICL2	19:11666417-11666417	NA	NA
LZTFL1	20:42651762-42666426	LZTFL1L1	25:41367584-41367601	GGCCTGCTTTTCCCTCTGCATATGTCTCTGCCTCTCTCTCTCTCTCTGTCTCATGAATAAATAAATAAAATCTTTAAGAAAAAAAAGAAAGAGGACTGACTTACACTAATTCTGGGGCAAACTCAAACTAGGGGCGCCTGGCTGTCTGTCAGTGGAGCATGCAATTCTTGATCTCATGAGTTGGAGCCCCACATTAGGGTAGAGATTGCTTAAAATAAATAAATAAAGTTTAAAAAAAGAACTCAGGCATTAGCAACCGGAGGCTTCTAAACAAGCTGCCCTCCCGCCGCATCTTCTGCGGCCCAACCGCCCTCGGCGACCCCGGGCTCGGTGGATCTCCGCCTGGCCTCTCCCGCTCCCCTGGGCTGCGACTCCCGCCGCCGCCATGGCAGAGTTGGG…	AAAAAAAAAAAAAAAAAAAGAACTCAGGCTAAAAATAGAGAACCTGTATTTTGAAAAAATATCAATTTTATTATATTAAATATTGTATTATATTATTAAATTAATATGTAATTACATTTATACAACTATATATCAATAATGTAACATAATTAAAATATAAAATAATTATTCTATTATTAATTATTTTATT
M6PR	27:36787745-36796194	M6PRL1	1:62261601-62261617	NA	NA
M6PR	27:36787745-36796194	M6PRL2	X:16172934-16172934	NA	NA
MAD2L1	18:55653677-55661017	MAD2L1L1	38:22646789-22646805	NA	NA
MALSU1	14:36959667-36968903	MALSU1L1	6:59851082-59851099	NA	NA
MAP2K4	5:36142610-36243673	MAP2K4L1	16:13500873-13500888	GTCCTCCGCAGTGAAATCCCAGTGCTGCTCAGGGGAGATCTTCAGCTTTCCTGATGATTCAATGCTGTGTGTTCTCAGTCTCTCTATGTGTGGGTTTTGAACTCCTGTAGGGTTGGGATTCAGAGTAAACCTTGCTGTAGATTTGAAAGGTGGATTTGCAAAATTCAACTTCAGTGCTTTGCGTTTACCCTGCATGCTGCTGACGGCCGGGTGGCCCGGCGCCGGGGGCCCCGCGGGGCCCGGGGTGCCGCCGCCGCTGCCGCCCCCGGAGCCGCCGCCGCCGCCGCTCGGGCTCGGAGCCGCCATTGTTGGGAGTGAGGAGCCGAGCGGCGCCGCGGCGGCTGCAATGCAGCAAGCTCCGTTAATTTGGTTTTAACCAAAAGAATTTTGACTTCTCTT…	AGGAGGTAAGGAGAAAAAAAAAAAGAAAGAAAAAAAAAAAAAAAAAAAAAAAAAAAAAAAAAAAAAAAAAAAATAAAACCAAATTAACAATACCTACAGTTACGACACACAATATTCTAAAGTTATTTCATCAGCGAGATAATTTTGAAATTATCTGGAGAAAAGAAAAAGAAAGGGAAGAATAAGATAGAAAAATCT
MAP4	20:40896920-41101626	MAP4L1	3:50263501-50263516	TCTTCACAGGGATGAGCTGCCACCAGCTTAATGGAGCTCTAGGAAGGGTTGAATATTTACCTACCCTCTCAGGGATGTGATTAGTATCTGCTCATAAAGATGGAGGTACCGGCAGTGGTGCAAAATGGCTGACCTCAGTCTTGCGGACGCATTAACAGAGCCACCTCCAGAGATTGAGGAAGAGATAAAACGGGACTTTATTGCCACACTGGAGGCAGAGGCCTTTGATGATGTTGTGGGAGAAACTGTTGGAAAAACAGACTATATTCCTCTCCTGGATGTTGATGAGAAAACTGGGAATTCAGACTCAAAGAAAAAACCATGCTCAGATCCT	AAAAAAAAAAAAAAAAAGATGGAGGTACCCCCTGTGTTTTGAGAGGCTGGTATGATAAAAGGGCATACACGGATCCAAGTGTTTCAAGGGAGGAACAAACCAGACAGCTATTAGGTACTACCTCAGGTCATTTCAACTTCCTCTTCCTGGA
MAP7D3	X:106608250-106640711	MAP7D3L1	3:66518623-66518640	NA	NA
MAPK3	6:18109184-18115728	MAPK3L1	20:38279157-38279164	NA	NA
MAPK6	30:17701154-17736072	MAPK6L1	6:40495604-40495618	AGAGGGGGCAGCAGGCTCCACGTGTGGAGCCCGATGGGGGACTCGGGGTCACGCCGTGGGCCCAAGGCAGATGCTCAACCGCTGAGCCATCCAGGCGGCCTGACAACATCCAATGACTTAAATAAAAATCAAAATACAAAGATTAAGAAGGAAAACATAAATGAATGAAAAAAATGGTGAGCTCTCTCGCGGGTCGGGGTTACATGGCGGCGACTGCGGCAAAGCGAGAGCCTCGGAGACGCCGCTGCCGCCAGCACAGCCGGAGACCTGAGCCGACATTGGGGGCTGTCCGCGGGCCCCGCACTCCCTCGATGAGCCGGAGAAGTCCCGTTTTATCAGAGTAAGATGGACGGTAGCTTTGATTGTGATTGTGGTGAGCTGGAGCCACCTGATCACTAA…	AAAAAAAAAAAAAAAAAAAAAAAAAAAATGGTGAGAATAATTGAAAATGTTCTCTTTTTTTAAGATTATTTATTTATTTATTGATAGACACACACACACACACAGAGGAGAGAGAGAGAGAGGCAGAGACAGGCAGAGGGAGAAGCAGGCACCATGC
MAPK6	30:17701154-17736072	MAPK6L2	8:39546010-39546024	GCAGTCGCCGCCATGTAACCCCGACCCGCGAGAGAGGGCGAGGGACAAGAAAAAAATTTAAATAAAATACTGGAGTTGGGGGGAACCCTCTTCTCATGTGCATAATCGTGCCAGTAAAAATATATAAATGTTAAATATAAAAAAGAGAAAAAGTAATGGTTTGGTATGTTTTAATTACATCAATACTTTAAAAAACTGGAAC	TTTTCTGGGCCGATTTTGCCCATGAGAAGAGGGTTCCCCCCAACCCCAGTTTTTTTTTTAAATTTTTTTTTTTTTTTTTCCTTCCTTTTTTTTTTTTTT
MAPRE2	7:54845121-54939054	MAPRE2L1	34:19792565-19792582	AACAATGTCACAACACCCCCTCTCCTCAATCTGCCTTTGCCAGCACTCTCAGCTAATGACTGTGCTTTCCCCATCTCTGAAAAAATTGAAGCAGTCAGAAGAGCGTGTTCACAGACTTTCACAGATGTATCTATAAACCTGCCAGCATTTTCAAACAAGTACTCTACTTCCTCTCCTCTTACTAAAGATACATTGTCCATCCCCTGTCTAAAGGGATTATGTGTTGAATTACACCCTCTAAAAATGTATATGTTGGGGAGTGCGCCAATGCCTGGTCCGACCCAAACGCTGTCCCCAAATGGCGAGAACAACAACGACATCATCCAGGATAACGGGACCATCATCCCTTTCCGGAAGCACACAGTGCGCGGGGAGCGTTCCTACAGTTGGGGAATGGCG…	TGCCCGCCCCCACTTGCCTCTTAACTGAAAAGCTTAAAATAAATTTCTGAAATATGAAAAAAAATAAAAAAAAAAAATAAAAATAAAAATAAAAATGTATATGTTGAAGTTTTAAGGAAATGAGGCTTAGAATAGTAAAGAGATAAACCCAACAGCCAGTTAAGAGCAACCTGGGCTTCAAATCTAAAGATTTGCACCTCAGGATGTGCCCTGATTTAGAAATAGGGCCGTTGTGAATGTAATTAGTTGAGATGAGGTCATACTGAAGTAGAGTGAGCCCCCAATTCAATACAACTAGTGTCCTTATACAAAGGAAAAATTTGTTCACAGCCATGCACACATAATATGTAGAGCGCCAGTCTA
MARCKS	12:69980003-69987150	MARCKSL1	29:19105847-19106063	NA	NA
MARCKSL1	2:68898750-68901139	MARCKSL1L1	1:108061224-108061238	CGACCCGCTAGCTACGCCCGCCACCGCTCCGCTCCGCGCCAGAATGCCCTGTGGGCTTTTTATATATGGCTTTTATGCTATTGGGGTATGTTCCCTCTATCCCTACACTGTGAAGAGTTTTAATCAATAAAGGGGTGCTGTACTTTGTCAAATGCTTTTTCTGCATCTATTGAGAGTATCATATGATTCTTGTCATTTGTTTTATTAATGTAGTTTATCAC	AAAAAATAAATAAATAAATAAATAAATAAATAAAAATAAAATAAAATAAAAAGCCCACAGTGAATATCCTTCTCAATGGGGAAAAACTGAGAGCTTTTCCCCTAAAGTCAGGAACACAACAGGGATGTCCACATGCACTACTGTTATTCAACATTACTACAAGAAGTCCTAGCCTCAGGAATCACACAACAAAAAGAAATAAAAGGCATCCAAATCAGCTAAGAAGAAG
MAX	8:39441216-39465681	MAXL1	33:10578645-10578660	NA	NA
MBTD1	9:27010554-27078417	MBTD1L1	32:2538323-2538339	CCTGGGCTGAAGGCAGCATAAACTGCTAAGTCACCTGGACTGCCCGATAGCACCAATTTAGAAACAACCTAAATGTCCTTCAACTGACAGATAAACAAACTGTGGTACATCCACAAATGGAATACTATTCAATAATAAAGACGAATGAACTATTGATACATCCATAAATATTACATCTCAAAAGCATTATGCTGAAAGAGTCCAGACCAAAGGCTACATACTATATGGTTACATTTATATGATATATTGAAAGCAAATCTATAGGGACAGGGAAATCCGGGGGCTGCCGCCGCCGCCGCCGGTCTGGGCCCAGCGGGGACCCCCCTGTAGTCGCCGTAGTCCCAGGGAGAGGCGCCTGCCCCCAGCTCGGGGAGGGGGCGCCGCGGGCCCGGGGAGCAC…	AAAAAAAAAAAAAAAAAAAAAAAAAAAAAATCTATAGGGACAGAAGTCAGATCTGGAGCTTCGACTGGGATAAAGGGATTAATTGCAAAGGAACATGAAGGAATTTGGTTAGGTAATGTAAATATCCTATATCTTAATTGTTTGTCAAAACTTACTGAGATGCAATTTAAAAATGTGAATTTTACCTCAATAAAACTGTCTCTAAAAGATAAATCCAGCCATAGAGAGCCACATATACACTGTGATCCCATTTATGTGAAGAAAAATTTAAATGTTTATATATAT
MCFD2	10:49091466-49101769	MCFD2L1	1:92936311-92936326	NA	NA
MCFD2	10:49091466-49101769	MCFD2L2	10:50187640-50187654	TAATGGCACTTCCTCCCCGCTCCTCCCATAGGAGAAACCCACACTGCTAGGGAACAGATCTACCTATGCTAAAATTTAGGGATACCAAATGAAAAACTCAGCTAGCCACCTGCATATATTACATTTCAGTAGAAGATAAACACCCTCAAATAAACAGCTTCCAAACAGCTATTAGGTAATTTATTTTAAGATATAAATGGATTCGGCGTCTGAGGCTCGCCACCCGAGCCTGGGGAAGGAGGTACCGGCGACCATGAGATCCCTGTGGCTGCTCAGAACCCCCTTCCTGTGTGGCCTGCTCTGGGCCTTCCGTGCTCCAGGGGCTGGGGCCGAGGAACCTGGGGCCAGCTTCTCCCATCCCGGCAGCGTGGGCCTGGATAAGAATACAGTGCACGACCA…	CCTATTGAATAATTTTTTTTCTCTCTGAAAGGTTTTTTCCCCTCTGAATTGTTGCTGTTGTTATTGTTCTGGTTTCTAACTTCCATACCGGAAGTTGTCCTCAGATCTCCAGTGATCTTTGTCTTTCCATTTATATCTTTTTTTTTTTTTTTTTTTTTTTTTTTTTTTTTTTTTTTTTTTTTGTTTTTTGTTTGTTTTTTTTTTTTTTTTTTTTTTTAATTTATATTTTTAA
MCL1	17:59759605-59763111	MCL1L1	1:13164923-13164939	TTTCTAGAAGATATGTTCCACTGGGTTACTTCTCAGGAGAGGGTTGGTTCTCTACATTCGGCCTTGGGATAGAGCCTTCCAGACATTCAAACCTTGGGTGAAGGAGGCTTCGGAGCTAAAATTCCTCCACATCTAATTTAAGTTCACAAAGCAGGCATTGGAAAAGATGAAAATCGACTCAGGAGGCGGCGGCGGCGGCGGCGGCAGGAGCTTGCGATGTTCGGCCTCAAGAGAAACGCAGTAATCGGACTCAACCTCTACTGTGGGGGGGCCGGGCTGGGGGCCGGCAGCGGCGGCGCCTCCTCTTCGGGAGGGCGGCTTTTGGCTTCGGGGAAGGAGGCCACGACCAGACGGGAGGGAGGGGGAGGGGAAGCCGGTGCGGTGATTGGCGGAAGCGCC…	AAAAAAAAAAAAAAAAAAAAAAAAAAAAAAGGAAAAGATGAAAATCTATTCATAACCTAAGATAGATTTGGTCTCTTTTCACTGAGTACTGCTGTTATTTAAAAATAACATAGAAAATAACAATTTAAAACATTAAAGTTAAAAGCCATTGAGACACAACCCAGTTGCCTTTTCATACTTGAAGCATGGGACTGCTAGGATATCTGCAACCTGTGAGATG
MCL1	17:59759605-59763111	MCL1L2	15:25677209-25677225	NA	NA
MCL1	17:59759605-59763111	MCL1L3	31:8305853-8305999	NA	NA
MCL1	17:59759605-59763111	MCL1L4	37:21511354-21511371	GCCGCCGCCGCCGCCGCCGCCTCCTGAGTGAGAAAAATGGGGATGGCCCCGACTCCTCAGTTGAAGGAAGCGGAAGTCTATAACCAATATTTTAATAGGTTCATTATACAAAGTAAAATCTTCAATTAAAATAATTTGAAAAGAGAAGCTACTTAAAGCTTCTACTTGGAGTATATTTATGAAGAAAAACTAAACATAACAAATAAGAATCTTTAATGAAAATAAAGCCAC	AAAAAAAAAAAAAAAAAAAAAAAAAAAAAATAAAATATTGGTTATAGTAAACTAGTATAATGGTTAAGAACATGGGTTCTAGAGCCAAATCTCAATTCTGAATTCTGAATCCCAGGTCTTCCACTTTCTAGTTGAATTAATAGCTGTATGATAATGAGCAAGATACTTAATCTACATATGCCTCAGTTTCTTATTTTGTAAAATGAGGATTATAATA
MCTS1	X:92559648-92574576	MCTS1L1	15:2818978-2818995	NA	NA
MCUR1	35:13188002-13222394	MCUR1L1	22:35370178-35370193	NA	NA
MDH1	10:63316818-63334556	MDH1L1	30:18988521-18988535	TTAAGAAGTGCGCGAACAATTTCAGCACCTCTACTGTTGCTTTCTATATAGAAATGTGGTGAAGACAATTTTCTTCAATTTTATATTGTCTCATTTTGTACCAAGCCATTTTTTATCTATCATTATGAATCTGCCGCACCGTTAGTTATATTGG	ATTACTATTATTATTATTATTATTATTGTCAGTTCTGTTGCTTTCCATATTCAAACGTCCTGAATATCACTTTTTTCAATTTTATTCACTCGAATGGTGT
MDH1	10:63316818-63334556	MDH1L2	32:5726864-5726874	TCATGACCAACTAAGAGAGAGAGAGAGAGACACTGCAGAAGAAAGGAAAACACTTTATATTTTAGTACATTTAATCCATTTGGGCAGTAAAGGTGACCCGGCTCCGTGAGGCTCGTTTTGCAGGTGCTGCAATTGTTCGCGCAC	ATGCTACTTTAGTACCTGGTGTTTAAACTTCCAGGAGCCCTCCTAAAAGTTTAAACACCAGGTACTAAAGTAGCATTGCAATGTAGTGAAGTAGCAACAAGATAATGACCAATGACCTGATGCAAACAGTTAAAAAAATAGCTAATAAAATTCA
MDM2	10:10936288-10963118	MDM2L1	7:55859221-55859238	NA	NA
MEAF6	15:4944059-4965768	MEAF6L1	17:32985978-32985994	ATTTACTGAAGAGTCGCTCAGCTTCCTTAAACTTCCGGTTCCTTCGGTCGTTTTTGCTATTGGAGTTTTTTTGGTTGGTCAGGTACCGATCCCAGCCGCGGATGATATTGCCGTACATCTGAGTGTCTTCCAGGTAGCTTCCTTCAAAAGCATAGATCTGTCTCTCCAAGTTCGCCAGTGTTTCCGCCAGCTCCTGCTTCCGCTTCACCAGCTCCGCCAGCTCCCGCCGGGTGTCCGGGATCTGCGGCGGCGCCGCCTTGTTGTGCATCGCCATGTTGGGCTGAGGCCGAACTCTCCCATTCCTAATGGAAGAGAAAACAGAAAAAAAAATATATCAAAAAGAAATTAATTGGAAATGGGCCCAGTAAAGCTGAGAATAAGTTCTGACTATACAATTTA…	CTTTGAAATTTTGCATATTATAGCACTTCTCCTGATTGCCTCACAAATTGAATATATACAATTATGTGTATTTCAAAATATGGCAATAAAAATTATATAAATATTTCACGGGACACGTAGGGAAGTAAAATTTGTAATTTCCTCCTAAACACATTCATTCGCTGGGTACTAGGGTGAACTCTCCCATTCCTTTTTTTTTTTTTTTTTTTTTTTTTTTTTTACAAAAAAAAAAATTTTTATTTCAAACAACAAGAAAAATTTTACACCAAACAAAA
MED11	5:31821263-31822946	MED11L1	6:37951218-37951234	CCTCCACGGGCTTTTCTCCTCGGCGAGACGCGACGCGGGAGCCCGGCAACAGAGAACAAATTTGAATCTGAGATAAAGAACCCCTATTAGTCCTGGCCTTGGCTGTTATGGTCACTAGATTCTGTCCTG	GGAGACCATTATTGATTCTACTTTCATATATTTTCTTGTCCTCAGCTTGCCGGTGGCTCCCTGATGATTATAACAGAGAACAAATTTTTTTTTTTTTTTTTTTTTTTTTTTTTTTTTTTT
MED19	18:38490536-38497508	MED19L1	21:37218019-37218040	TCTGTCAAATCAATTTTCACCTATCACATCAATGTATCATATTCTATGTGTTTTTTTATTAGTAACATAAAAATATATTGAAAATATCCGAGACACAGGGACCGCGCCGGGGCGGAGGAGCCGATGGAG	TTAAAAAAAATTTAAACAAAAAAGATAAAAAAAAAAAAAAAAAAAATATATTGAAAATATCCAAAGAAAGTAACAATAAAACTTTTTACAATAACTCTTTACAACTGCAGTTCCAATTATTGATAACTTAGACCTTACCCAAGATTTAATTTTAAAAATCAAGAGAACTCCCATTCCACCAATTTTAC
MED24	9:22500937-22527838	MED24L1	28:16535030-16535045	NA	NA
MED4	22:3396276-3411037	MED4L1	28:4308023-4308034	NA	NA
MED6	8:44301449-44323554	MED6L1	29:25271926-25272002	NA	NA
MED7	4:52998748-53004063	MED7L1	2:48546351-48546364	CAAGAACCTCAGCCCAGGCTTTACGCTGGAGCCCCAGATTCATTTTAGGTGATATGTAGGATCCATGGTATTTCGTATGTGTCAGATCAACTGATGCTGGACATCAGGGGAGGCCCAAAGTGATAGCAGTGACCTCAAAATATCCAGC	AAAAAAAAAAAAAAAAAAAAAAAAAAAAAATAAAATGAATCTGACCACAGTCTGCTCTGAGACCATGATGCATTGCAGGTTATTTTCAGGAAACTATGTTTACTATGTGAGGAAAC
MEMO1	17:25231982-25298786	MEMO1L1	18:592215-592234	NA	NA
MESD	3:56698417-56709632	MESDL1	20:8623483-8623496	NA	NA
MEST	14:6435693-6449099	MESTL1	1:92407914-92408366	NA	NA
MEST	14:6435693-6449099	MESTL2	21:9006627-9006695	NA	NA
METAP2	15:35363494-35398168	METAP2L1	23:40992178-40992189	TTCCGTCTTTTTTTCTTGGCTGCTTCCTCAGCCGTAGAGGCAGCTCCCTCTTCTCTGTCGTCCGGATCCAGGTCGCCATTCAGGTGGCTCCCGGAGGACGCTGCCTCCTCCACGCCCGCCATGTTGCCCGAGAGCAAATTTTAACTTTTAAATGATGAATTTATCATTTTGGAAGATGTCATTGAATAGTTCTTACCCTCTCATTTTTAATTATGAAGCTTCTAAAACCCAAAGAAGGAAAAAAAAATAAAAAAAAAAAAAAAATAAAAAAATAAAAATAAAAAAAAAAA	AAAAAAAAAAAAAAAAAAAAAAAAAAAAAAAAAAAAAAAAAAAATAAAACCCAAAGAAGGAACTGAATTTTCTATCAGCATGGCTCTCTTTAGTTTCAACTGTTCTGTC
METTL15	21:48578735-48759264	METTL15L1	1:42847221-42847236	NA	NA
MEX3C	1:23818790-23838106	MEX3CL1	14:48327913-48327929	GTGAAATTTCAGCTTAAGCATCTGAATATCCCATGGGATTTTGACATAATCAACAAGAATGATTGGCTGACCTTACGCCCTCCCTATCAGTAGGACCCCAAAGACCATTCACTACATTTTTCTACTTCCCTTATCTCCTAGAAGTGTTCAAGTCTTTAAGAAACCATAGAGTAGGACGAGCCCGACGACGCCGACGAGCCCCGGCCGCCGCTGCTGCTGCTGTCGCC	GATAAGACATCTAGCATACAGATAGGTTTAGTAAACAGTGGTTGTTAAGTATTACTTTTATCATCACAGTGTACTCTATGGTTTCTTTTTTTTTTTTTTTTTTTTAAGTTAATGGAAACAAGTCTTTATTAAGTAACTTTTAAA
MFSD14B	1:99201206-99271351	MFSD14BL1	3:17108405-17108420	GACTGGAGTTCAGACGTGTGCTCTTCCGATCTCATGAGGGCGCGGGCCCCGCCGCAGCCACTGCGATTGTGGTCCATTATATTTTTCTTATTTGCATGTATTTTTATCTCTTCAACTATGATTTGACTCTTTGAGGGCAGAAACCATTTTTTAAAAAATCATTTCATGTGGCTAGCCATAATCCTGGCAAATGTTAAAAGTTCCATAATTTGTTCAATTAACAATGCAATCAATGTCTAGGGATCCCTGGGTGGCGCAGT	GAATTCATAGCTTTTCCAACACTAATCACATTGTATTTTATAGCACCAGTCAACATTATATTTTTCTTTTTTTTTTTTTTTTTTTTTTTTTTTTTTTTTTTTTTTCCATTTTTTTAAA
MGME1	24:5068147-5083941	MGME1L1	15:9727918-9727935	NA	NA
MINDY1	17:60092245-60103797	MINDY1L1	17:31000036-31000050	AATGTGCTGTATGATAGATTTGGGGGAAGTTTAGCTTCTGAGTGTTGTAGGTTTTCTTCTACTTGTCTGATGGTTAATTAGGAACTCATCCATTAGCATTTTGAACAATAGGAGGTCTGGAGCACTTAAAAGATCGCTTCCGGCCCTTCAGTTGACCTATTCTGACCATGGAACACCATCAACCTGAGCA	AAAAAAAAAAAAAAAAAAAAAAAAAAAAAAGATCGCTTCCAAGTTTGGAATATTTGGAATATTTCCAATATTTAAGTGTAAGCCAAGCTTTTCATTTTCCTGAAGTTAATGAACTCCTTTGAAGTTCCAGTTTCTCTCTATTAGTAGGCCAAAGGTGGTTTGGGTGCAATGCCTGAAAGCACAACACAGAACTGACTGGATGTGGAAA
MINPP1	26:37585096-37629221	MINPP1L1	4:56815699-56815699	NA	NA
MLF1	23:51918504-51935164	MLF1L1	24:25687817-25687832	GTGGACCGACATGACTGTGCAACATTCTGTGTATCCCATTGGCCACTGGCCCCTATAAAGCTGCTACGCCTCTTAGTCTCGGGGTCCAAGTCCCTGCTCCGCTGTGTCAGGTACACTTGGACCCAAGCTCGAGCTTGTAAATAAACCCTCGTGTGTTTGCATCGGTGTCGTCTCCTTGGTGGTTTCTCGGATTCGCAATCTTGGGCACAACACTAGGATCCAGTCTAGCATTGAGCCTCGGCTTATGCTCTCTCTAAAATAAAGAAATAGCCCGCGGGGGAGGGAGGCGGCTGGGGTCGGGGTCGCGGCCGCGGCGGCGGTGCCCCTGCTCCCGGGTGTCCGCGGCCGCCGCGCGGGCCGAGCCACGATGTTCGGGACGCTGAGCAGCAGCTTCGAGGA…	CAAATGTTATGTAGCCAGCTAGCTTTAAAATCTCAAAAAAATAAACAAAATTACACTGGTAAAAAAAAAAAAATAATAAAATAAAATAAAATAAAATAAAGAAATAAAATATTTTTATTTATTTGAGAGAGAGAAAGAGCGTGAGTGGGGAGAGGGGCAGAGAGGGAATCAGACTCCCCATCAAGCAGATCAAGCAGGGAGCCTGATGTGGGACATGATCCCAGCCAGGACCCTGAGATCATGACCTGAGCCAAAGGCAGACACTTAACAAACCGATCACCCAGGCGCCCCTAAATAAATAAA
MMAA	15:44221082-44243530	MMAAL1	11:18615006-18615019	NA	NA
MORF4L1	3:58127152-58149709	MORF4L1L1	1:118110913-118110932	TTCTAGGGATGTAGAGCCAGTTTAAGATTCTCTCTCTACCCTTCTCCCTCACCCCTCCCCCACATGCTACGTGTCTCTCTGAAGAAGAATTCTTCTTTTTTTTTTTTTTTTTTTTTTTTTTTTTTTTTTTTTTCTTTTATT	GCCTCCTCCTTCTCCCACCACCCCCGACTACCGCCCCCTACTCTCTACCTGAAGAAGAATTCTTCTTAAGAATTTAAAGCATCATAGAAAAAATAAAAGGGTTAA
MPHOSPH6	5:69887092-69909647	MPHOSPH6L1	13:25029324-25029338	CTACTTCCAGTAGATCCCTAACTCAGTAGGGATCTATGAAACCCAATTAGAATTATTGCGAGAACTTTTAGTAACATATGACTTCAAGTCTCTAATTTTAACTTTTCTTGTACTTCCTTCCTTCTGACCATATATCAGCACCCAGTGCATAGTCGGGGTTGAGCAAAGCTCCATCAAAAGATGAATAAAGGCCAACATGGCGGCCGAGCGCAAGACGAAACTGTCCAAGAACCTGCTGC	ACCCACAGTAGTGCTTGAAGAATTGCTTTTAAGTGCCCGTCTTCATGGTCAGACCATAAGTTCCATGAAGGCAGGGCCATGCCTGTCTTTTAAGGTTCTTATTTCCCTTGCTAAGCTCAGTGCATGGCACATGAACTATATAATTCATATTTATTCATCTTTTTTTTTTTTTTTTTTTTTTTTTTTAAAAAAAAATTTTTTTTTAAAAA
MPV17	17:21280523-21290967	MPV17L1	8:37233951-37233967	GCCTAGAAAACATGGGGCAAAGCCCCCCTGGTCCAACAGCATCTTCTTTAGTGCATCAGCCTTGGCGGTGCCAGGGATGAGCCGGTCCAAAACCCGGTACCAGCCTCCTACTACAGGGCCCACAAAGCCACAGCCCAGGAAGGCCATGGTCAGGGTCCGGCCAGTCTGGTGTCCCCGGAGACCTCGCTTCTCCACCAGCTGCTGTGAGATAATGTCACCCAGGCCCATCAGGGACCCAGCTGTCAGGACCTGTACTTTCCACGGGTGAACAGTCAGGGCTCGCTGGTATGCCCGCCAGAGTGCCATGATTCCTGCGCTGGCGTCCAGCCCCTCCCACGTGACCAGCTATTACTGGTTATTTTCATTCTATATTGGTTCATGGCTTTTCTTTCCCTATTT…	CCACTTTTAGAAGCTGATTTTTTTCAAGCCTTTTTAGTTGTTATTACCAGGAAGATTGATCCTATTTACCAGGACTGTCATTACTGGGTACTTTAATGATGTGTTATTATTTATTACTGGTTATTTTTTTTTTTTTTTTTTTTTTTTTTTTTTTTTTTTTTTTTTTTTTTTTTTTTTTTTTTTTATTTTTTTTTTTTT
MRM3	9:45004382-45011834	MRM3L1	6:55307084-55307095	NA	NA
MRPL11	18:50890411-50893891	MRPL11L1	2:22861398-22861411	CCGCGAGGTGATCCGCTGTGTTGCGTTGCTGGTGAGTCTCACGAGCTGAGCACAGAGTTAACCATCATACCTGGGCATCCCCTTGACCTTGACAGCAGTGGTTTTGAAAAGCGTGGGAACGAAAGGGTGGCTGGAGTTTGCTAGAAAACGCATGACTGAATGAAAAACAAAAGGGGACTCAGGATGGCGGCGCCCGTGGCCGTCGCTTTTGCTGTAATCCTGAGCTGAA	GGGAGCCTACCTCTCTCCCTCTGTTTCTTATGAATAAAATATAAAAAAAAATTTCTCTCCAGAAACTATCCCTACACACAAGTAGGTTCCTTTTGTTTTTCTTTTTTTTTTTTTTTTTTTTGACAAAAGAAATGTTTATTTAAGTTTGATCTCTTGATA
MRPL11	18:50890411-50893891	MRPL11L2	21:29272775-29272775	NA	NA
MRPL11	18:50890411-50893891	MRPL11L3	24:37931500-37931723	NA	NA
MRPL15	29:5704572-5711577	MRPL15L1	8:38626640-38626656	NA	NA
MRPL15	29:5704572-5711577	MRPL15L2	20:12780766-12780781	CAGAAAATGAACTCAGGTGTAAAACTATAAATTGAAAGGGACTCAGATCAGCTAGTTCAGAGAGGTTACACGGCTTGATCAGCATCTTACTACAAATTAAAAGCAGAGTCAGGATTCAAATCCTTGTCCCCTGACTCTCTTGGCTGTGCAGCCATTTCCCAAAGCTGTGTGGAAGCAGAACCTTCAGAAGATTCAGTGTCAGCATAGAGGCCAGGTGAAAACTAACCCCTACGGGGAGGGTGTGGGCCCTCCGATGGCGGGTCCCGTGCAGGCCGGCGGGGCAAGAACCCTGGACCTGCTCCGGGCCTTGCCCCGTGTGAGCTTGGCCAACCTAAAACCGAATCCAGGCTCCAGGAAACCGGAAAGACGGCGAAGAGGTCGGAGAAGAGGTAGAAAATG…	GGACTTCTAGGTATGTGGGTACAAACAGCTGGTTTTCTCAGGTCTCTTTGGCTGGAGGAAAAGTACAGAGCTACAGAGGAGAGCTCTACGGGCTTATGCTTGGACTAGGGGTTAGTTTTCTTTTTTTTCTTTTTTTT
MRPL30	10:43494658-43513241	MRPL30L1	5:11600206-11600221	AGCCCAGGAAACACAATATTTTTACTAAATTCCGGTTGCACACTCTTGCCTGCCAGTGCTCTGAGCATAAGGCCGAGGGCTCCCTGTTAGAAAGATGGATAAGGGGGTTCGCGGGTGGCCCCAGGTGGTCCTTCCTCTGTCCTCC	CCCAGCCCATTCCTGACTGCATGTGATTAGCGTGTCCTTGCCTTCCGTGAGAAAGATGGATAAGTATTCGAAAATGAATATTCAACTGACTGGCTCCGAACGGAGACTCTCCCTGCAACCTTGTAATCAGAATCAGAAAAGGAGTCATTG
MRPL30	10:43494658-43513241	MRPL30L2	7:24878844-24878862	NA	NA
MRPL30	10:43494658-43513241	MRPL30L3	8:40099840-40099857	NA	NA
MRPL30	10:43494658-43513241	MRPL30L4	11:64386639-64386656	GAGGGGTGCGGTGAGAAGGTTTTGCTGTAATAAAAGGAAATTGACTGGGGCAGAGGGGTACACACCCACACACACACATCCCCAAAAAACCAACATTGGTGGTACAAGAGAAGGACCTGGTCATTAGATCAGTATTGAAAAGGGGAGTCAGGGGCTGGGTTCGCGGGTAGCCCCAGGTGGTCCTTCCTCT	AAAAAAAAAAAAAAGAAAAGGGGAGTCAGGGAAGGTCATAGATGGATTCCAGTGGTGTGTGATGGGAACAGTGAATGGTTAGGAGAGTTGGCTCCAATGGAGGAGATTCCTGTAGAGGGCGTCTTGGTTGACAGATGCCCGTTGGATCTCCGGTAGCTTCTTGAGTT
MRPL30	10:43494658-43513241	MRPL30L5	25:29789990-29790006	NA	NA
MRPL35	17:38912895-38923703	MRPL35L1	28:3297438-3297452	AAGACAGGGGCCGCCATCTTGCCACCCCGCCCTACGGCAGCCGCCCACAGAACCTTTTCCACTGTGGACCAGAACTTCAGTATTGACCAATAGGTGTATTTTCTAAAACTGTGCCAATGTGTTCACTGAGCAGATTAAGATTCTGAGCCCAAAGAGGTGATGTGACTGAAGAAAAGTATTTCCTTGGTCTTAGGCACAAAATGGTATCCAG	AAAAAAAAAAAAAAAAAAAAAAAAAAAAAAGAAAAGGTTCTGTGTCTTATCCAGGACATGAAGACAAAGCCAGATTCCCTAAGGTGTATTCTTGGACTTTTCCAGAAGATTGATTTTTCTCCAGCCTTAGATTGCTACAGGACCGAATTCATTGGTTACCAGCCTTCA
MRPL42	15:33701938-33732885	MRPL42L1	6:45412861-45412876	AATGGGATGATAGGTGACACCATTACAGTTTCTATATAGACTAAAAGCATAATAAGGAAATACTGAACAATAATTTTTATTATTTATTATTTATCTCCAATAATAAGATAATTTAGATGAAATCGAAAAAAAAATCCTTGAAAGGCACAAATTACCAAAACTCGTTCAAGAAGAAATAGATTGGGATTGAGGTAAAATGGCGGG	AAAAAAAAAAAAAAAAAAAAAAAAAAAAAAAAAAAAAAAAAAAAAAAGAAGAAATAGATAATCTGAATGGTTTTACGTCTACAAAAGACATTGAATTTATTTATTTATTTATTTTTAAAGATCTTATTTATTTATTCATGAGAGACAGAG
MRPL42	15:33701938-33732885	MRPL42L2	8:10243040-10243079	AAAAAAAAAAAAGAAAACAATACACCAGACAAAATTTACTCCTGATAAAAGCTCACAAGTTACTATAATGTAGTTTTGCCAAAAACTTTTAAAAACTTTATAATGAAGACAAAAACATTAAACCCAAATATGAACAAGTCTCTAGATCTATAACTTGTTTACAGGAAATAAAAAGAAAAGAGAAAGCAGGCGGGCTCGTGGTGGCGCTGACACAGGGATGAAAATAGATACGCGTGGAAGCAGAATTTAGAATCCGTCTCTTCAAATCATCTTTCACACCACCCAATAGTATCTTGATTCACCATGGCATTGGCAGCAGTAAAATGGGCAATATCAAACAGAACTGTCTGGAAACATTTATTTTCAATTCAAAATGGAGCTTTATATT	AAAAAAAAAAAAAAATAAAAAAAAAAAAAAAAAAAAAAAAAAAAAAAAAAAAAGAAAAGAGAAAGCACATTAAAATGATACCACAAGGATGCAACCAGCAACCAGGCTTATATTATTTTCTCTACTTTCACATGTATTTTCATTAAACCTTTTGAAAAGATAGATTTTTTTTATTTATTTATT
MRPL42	15:33701938-33732885	MRPL42L3	9:13154721-13154728	CATCCCTGTGTCAGCGCCACCACGAGCCCGCCATTTTACCTCGGGAGCCTGCTTTTCCCTCTGCCTGTGTCTCTGCCTCTCTGTGTCTCTCATGAATAAGTAGATTAAAAAATCTAAAAAGAAATAAACAGATAGATATTCATAGTCTTGACACATCCAGATTTTTCTAGGAATTAGGGACCTTACCCCATATTTACATGTAAAATGAATCAAAGATAAAAGTAATTCTTCAC	AAAAAAAAAAAAAAAAAAAAAAAAAAAAAAGAAAAGCAGGCTCCCCTCGGGGAGCCCAACGTGGGACTCGATCCTGGGACTCCAGGATCACGCCCTGGGTCAAAGGCAGACGCTCAACCACTGAGCCACCCAGGCATCCCAAGACTGTGGCTATTTAATTACATTCATTTGGGGGTGCCAGACTGGCTCAGTTGGAAGAGCATGCAACTCTTGATCTCCAG
MRPL42	15:33701938-33732885	MRPL42L4	18:52829981-52829981	NA	NA
MRPL43	28:13674401-13675648	MRPL43L1	15:50558017-50558017	NA	NA
MRPL45	9:23829557-23838738	MRPL45L1	36:30106582-30106598	GACATTCTCTGAAGTGGATCTATGTTCCGTGCCCGAGACCATTAGACTTGTGCACATACAGAGCATTTTCAAATATTCTTACAAAAAAATGAGAGTCGTTCTTTTGAGTATATGTATATTGTAAAGTATGAACTCTTGCTTCCAATGTGAATGTCTCTTAAAATTTCAATATGGGCGGGAGCAAAATGGCAGCCCCCACACCGCGGGGTTTGCATT	AATTTCGTATACATCTTCAGATTTCACGTCAATATGTAATCGGTGGTGGCAAAATAATATGAAATCGAGTGTATTGCGTTCATATTGAAATTTTTTTTTTTTTTTTCTTCTAAGTTTGGATTTATTGGAAGCCCACATAATTCACAGTT
MRPL48	21:24391538-24456860	MRPL48L1	8:16580278-16580292	AATATTCTTGCTACAAACAGAACCTTGATAAATAATCCAGGAAAAAAGCAGTCAGGGCCTTTATTCTTGGCAGACCCAGTAGGATATATGGAGGATGAGAGATGTGGAGTGGTGCCTCCCAACAGATGAACTATCTCAAACAGTCCAATTAGAATCATTTTTACGTCAGACGCCAGGGGGATCGCTGCAGCTTGGGCAGGTCTTCAACTTAAACAGTTCCCGGCCGCAGCAACAAAGGATGAACGGAGCTCTGGGAAAGATGCTGTGTCTGAGGACCGATACCATTTTTAAGC	AAAAAAAAAAAAAAAAAAAAAAAAAAAAAAGAATCATTTTTACTCTTTCTTTTGAAATTTGAACCTGGAAAAATATTGTGTTTAATTTTCCGCAGCTATCTTGTACTTACAAAGGACTGACCTATCTGAGAATGGAGTCAGCATGGCAAAAATCAGAGATAAGAAAAGAAAATGAAAAAAAAAATAAAATAAAAAAGCTTACTGAGCTACGGATCAAGTATACCC
MRPL48	21:24391538-24456860	MRPL48L2	8:50547859-50547874	CTCCAGTGACCCACCTCTTACCTGCCACTTGCTCTTTGTGTTTGATTTTCCACTGTTTGCCCTTGAGTCCCACTTTCCTAGGATGAACTGAAGGGAGTGGGGAAATGGATGCCAGAACCAAGCACTAACCCTATTAAGTCTCTTTGTTGG	TTTTGTGTTGGAGGGACTCCAGTGACCCACCTCTTACCTGCCACTTGCTCTTTGTGTTTGATTTTCCACTGTTTGCCCTTGAGTCCCACTTTCCTAGGATGAACTGAAGGGAGAATTTCTATTCCTTGCCTGAGTGAGATTTATTTTCCCTGTCTGCTCTGGGACCTTGGCATCAGCCAGGGATTCCTTTATTTAATCAATATTGATTCAGCCACCTTCTGGGCGTCAAACTCCAGGAAAGGGAGTATGATTACACTTGACCTGCATCATTGGTGGCAAAGCAGGTTAGAAACCTGATCAGGGAGTGTTTTCAGACGCCAGGGGGATCGCTGCAGCTTGGGCAGGTCTTCAACTTAAACAGTTCCCGGCCGCAGCAACAAAGGATGAACGGAGCTCTGG…
MRPL53	17:48663271-48666078	MRPL53L1	1:25899914-25899930	NA	NA
MRPL53	17:48663271-48666078	MRPL53L2	3:52954736-52954748	NA	NA
MRPL53	17:48663271-48666078	MRPL53L3	10:53110395-53110411	ACAGCCCGGAGGCGGAGCCGAGCCAAGGATGCCGCCATGGTGACCTCCCTATTCATATACTCTAAAATATAGAAATAAGCCATATGTCTTTTAACAGGTGATTGGGTAAAAAAAAAATATATATATATATATATATATATAAGTTTTA	ACCCCAAAAAACTGTCAAAAAAAAAATTTTAAATTTTAAAACAAAAAAAAAAAAAAAAAAAAATAGAGTATATGAATAAAGTCAATTCAAATATCTAAACAGGTTATTTTATGAGCATAAGTTTTCAGTACACTTGGGTAATAATTATTTTTGTGCGGGTAATAATTAATAGCGTCATGGTAAAAATATGTTTACTCACACAAGAAACTACCAAGTTAGTTTTCCA
MRPL53	17:48663271-48666078	MRPL53L4	11:26895867-26895881	AAACTACATCTCGAAATTGTAAAGAAAGAAAAACTTATATATATACAAAATTAAATACATTGAAAGGATAGAATGTAACTGTAAAGATGAAAATTTTAAAAGACTTTAACAAATAATAAAGAAAAGAGAGAATATGATCAGACAGGTAAAGAGAACAGAGCCATACATTAGATTCTGGATATAGCTTCCGGGGCGGAGGTCACCATGGCGGCATCCTTGGCTCGGCTTGGCCTCCT	AAAAAAAAAAAAAAAAAAAAAAAAAAAAAAGATTCTGGATATATTTTGGTCTGTTAGAAGAAACTGCATCCTAAAATTTTTTATTTTTTATTTTTTTATTGAAGTTTGATTTGCCAACATATAGTATAACACCCAGTGCTCATCCCGTCAAGTGCCCTCCTCAGTGTGCATCCTAAAATTGTAAAGAAAGGAA
MRPL57	25:16979757-16982141	MRPL57L1	15:8337871-8337886	TTTTAACAAAAAAAAAAAACTTTTGTGCACCAAAGGACAGTATCAACAGAATAAAAAAGGCAATTCATGGAATGGGATAAAATATTTGTAAACATTTATCAGATAAGGGATTAATATCCAGAACAAAAAGAACTTCTAAGAACTGAGTAAAAACTCAATTCAAAAATGAGCAAAGAGGGAGGCTGTGGGTGTGTTGGGGAATGCGGTCGGTGCCATGTTCCTGACGGCTCTGCTCCTCCG	AAAAAAAAAAAAAAAAAAAAAAAAAAAGAGCAAAGAACTTGAATAGACATTTCGCCAAAGATGACAGGCAAATGAAAAGATATTCAACATCACTAATCACTAGAGAAATACAAATCAAAACCACAAGTTAGCACTTCATACTGATTAGAATGGCTCTTATCAAAAGCACATAAAGTAAGTGTTGATGAGGAT
MRPL57	25:16979757-16982141	MRPL57L2	25:28907704-28907721	CATTCCCCAACACACCCCACAGCCTCCACAAGCCAGCGGGCACGACCCCCTCACCTTTCTTATTCTTGTATTTCTGCTATTACTTCACTCTTTCTCAAAATATCTTCCCAGAATTTCAGTGGGATTTTTGGATGGGAGAGGAGAGGGATCTTGTA	AAAAAAAAAAAAAAAAAAAAAAAAAAAAAAGAATAAGAAAGGTGACCATCAGAAGACCAGAATCCTGAGAACTCCTAGAGGGCATAGAGAGCATTAGAAAGGGTTAACAAAGAAGGAGCTAAGGACACCGCAGTTTAAACACCTCACGGGAACATAGGTCTTGAAAAAGAAATTCCATAGAATCTTTAAACTGGGTGGCAACAGAAAGTACAGA
MRPL58	9:5449327-5457834	MRPL58L1	5:87485127-87485139	NA	NA
MRPS16	4:23827690-23829319	MRPS16L1	10:67584333-67584348	NA	NA
MRPS22	23:35508478-35536081	MRPS22L1	1:117398403-117398415	NA	NA
MRPS22	23:35508478-35536081	MRPS22L2	6:9805567-9805583	ACGTTCTGAGGGCCGCCATGACTATCCGGAGGTGGGGGGGGAGCCTTGCCCTATTTTCTAAAATATGCTTCCTAGTTACATTTGAAAGGAAATATTATTTTAAATCTTAAGAGAGGTCCTTGAGAGCATTAAATCAGAAAAATTTGATACAAAAATAGAATTTAAAAACACAGAAAAACATATATAACTCATTTTAGATATATTT	ATTTTTAAAAAAAATTTCATTTTACTAATTGTAAAAAAAAAAAAAAAAAAAAAAGAAAATAGGGCAAGGATATAATTTATAATATTGCCATCGCTTTTTGAGCATTCTCAGTCTTTTCATTTGTAGACACATCTTCCATATGTGTGATTAGTGTGTGCACAATCTTCATCTAATATTCTATCACATGCCTTTC
MRPS26	24:18215055-18216993	MRPS26L1	13:332793-332809	NA	NA
MRPS27	2:55263654-55351615	MRPS27L1	16:41328696-41328889	TAGCCTCTGCCTCTCGCACAGGGTGTGATCTTGGACTCCTGGGATCCAGTCCCACTGTGCTCTTCCAGCATGGAGCCTGCTTCTCTCTCTCTCTGTGTCTCTGCCTCTCTCTCTCTCTCTCTCTCTCTCTCTCTCTCTGTCTCTCATGAATAAATAAATAAAATCTTTAAAAAAAAAAAAAAAAGAAAGGCACT	GGCTCAGTGGTTTAGCACCTGCATTCGGCCCAGGACGTGCTCCTGGAGTCCCAGGATCAAGTCCCACATCAGGCTCCCTGCATGGAGCCTGCTTCTCCCTCTGCCTGTGTCTCTGCCTCTCTCTCTCTCTCTCTCTCATGGATAAATAAA
MRPS31	25:521401-555678	MRPS31L1	29:5621197-5621214	NA	NA
MRS2	35:22460435-22496064	MRS2L1	3:47740405-47740405	NA	NA
MRTO4	2:79360897-79367038	MRTO4L1	7:80578245-80578253	TCTTGGCAGTTTTTGTTAAGGAAACTTTCTTGTCGCGCTTGGATTTGGGCATCGCGCTGCAGGCACGTGCGGCGGCAGGCGGCAGGCCGAGTTAAACCTATTAATTATAGACCGACTTCACCAGCAGGGCCTCCTTATCCCCATCAGCTCCCCATGCAACACCCCCATTCTCCCTGTCAGGAAACCCTTCTGGAGCCTATCCCACCTGGTGAC	CCCTCTAAACCAATTGTGGCCACTCACCACCCCCTAGTAAAATCCAGTTAAAAGATCAAACCTGCTTTCCTTGTCGTCCCCAATTGCCCATTTCAGAAACTCACTGACGGGGAGTTAAACCTATTAATTGCTGCATGGACACTTCTTGTT
MRTO4	2:79360897-79367038	MRTO4L2	20:29732688-29732703	NA	NA
MRTO4	2:79360897-79367038	MRTO4L3	26:24027519-24027532	TCGCGCTGCAGGCACGTGCGGCGGCAGGCGGCAGGCGGCCTCATCCCCATTTTATACACAAGGAAACTGAGGCTTGGAATGTTAGTATCTCACCCAAATCATATAGTGTTTAACTTGAGACCTGAGTCTTGATTCCAGGTCTGATTCCAGAGTCCATTCTTTTAAGGTCAGTTGATATAGACCTTTCAAAAC	ATAGGAACCAGACTAAGTGTTTGATATATACTGTCTTATTTCATTCTTCAATAACCCCATGAATTAAGCCCTGATATCATCCCCATTTTTTTTTTTTTTTTTTTTTTTTTTTTTTTTTTTTTTAATAAAAAAAAA
MSANTD2	5:9623023-9654860	MSANTD2L1	36:15316830-15316845	NA	NA
MTARC2	38:15426884-15451701	MTARC2L1	11:56671342-56671506	NA	NA
MTFR1	29:15314955-15390776	MTFR1L1	3:75384722-75384722	AATGAGAATCTCTTATTGAAATACAGATACACATATTCTTTTAGATATATTTAGGCAATTTTAATGTCCAACAGAGTTGAGAATCATTGGCTTGAGTGATGCTATAATGATGATGATGGCTTTGTGGTATGTATATATTTTATGAATCAGACCATCAAGTAAAATAATTGAGTCTGATTATTAGGAAGTCATTTAGAAATTATTAGAAATGATTCTCAGTGGGAGCAGCGCAGGAAGGCGCCTGGCTGCCGCGCGGCAGAGGTACTTTGGTCTGGGAAGCCATATGGTTCATCTCGAAGTATCGTAAGGAAAATTGGTACTAATTTATCTCTGATCCAGTGTCCAAGAGTTCAGTTTCAGCTTACCAGTCCTACTACAGAGTGGAGCCCCAGCCATCCA…	NA
MTFR1	29:15314955-15390776	MTFR1L2	3:79310360-79310374	NA	NA
MTFR1	29:15314955-15390776	MTFR1L3	7:19654781-19656077	NA	NA
MTFR1L	2:74116837-74133414	MTFR1LL1	11:25407172-25407186	NA	NA
MTFR2	1:28830818-28844875	MTFR2L1	12:48060911-48060931	AAAAAAAAAAAAAAAAAAAAAAAAAAAAAAGCCACAGAGCCAGCATGGGGCTTGATCCTAAGACCCTGAGATCATGACCTGATCATGACCTGAGCTGAAATCAATAGTCAGTCAGATGCTGGGACACCTGGGTGGCTCAGTGGTTGAGTGTCTGCCTTTGGCTTAGGTCATGATCCCAGGGTCCTGGGATCAAGTCCCGCAGTGGTCTCCCCACAGGGAGCCTGTTTCTCCCTCTCTGTCTCTGCTTCTC	TTTTCAAACCAAGTGTTTTATTTCAAAAAACTTCATAGTAAGTCAAAAGCAAAAAGGAATGTGTGAAAGTTAACAGAAACAACAGAAACATTAGCAGTACCAGCAACAACTGTATAGCCTGTTCTGCACAGGTACTTTAAGAGAACTTGAAGGCAAAGATATATCATGAACAATACACTTTTTAAAAAAAAATCAAAACATTAACTTCACATTATTATAGCTCACTCTTGAAGTTTCTGGACTAGAAAATGGAGAAGATTCCCACGACCTATTTTCTTTCTCAAAGGAATCATCTTCTTGGAAAGCAAACTTCTCCTTAAGTGCATGGGATATTAAAGACACTGGATCCCAATGTGAATCTTGTCTTTTCCGCTTATGAATGGGTTTACCGCCAGGTGA…
MTHFD1	8:38831672-38889607	MTHFD1L1	9:26411554-26411554	NA	NA
MTPAP	2:16666742-16695753	MTPAPL1	18:549899-549964	NA	NA
MVB12A	20:45365850-45370114	MVB12AL1	14:52121353-52121353	NA	NA
MYL12B	7:69877727-69895196	MYL12BL1	1:57182713-57182730	CGGCTGGGCTGCGGCGCGACGGCGGCGGCGGCCGAGAAATTATTTTTTTTTAATTTTCATTCCGAAATAGAACATGCTCATTATAATGAAAATTCAGTCAATAAAACATAGAAAGTGAAAAGTCTTTCCAATCACACACTTTTTAGGGAAAACTTGTATTAGCAGTTAGCTACTTGTCTT	AGATTGAGAATAAAAATCAACAAATGTGAAAAAAAAAAAAAAAAATAATAATTTCTTAACCAGTCCAATTCTTAATTGGGATAATCACACTATCCCAATGAAAATCATAAAATTATGTTTTATGTAACAAAAATAGAAAAATAAATGGTAAAGAATATTCTAAAAAAGAATAATGATAAAGGTGGGAGAAGTGCCACGCATCACTAGTCCTTCCAGATAATGAAT
MYL12B	7:69877727-69895196	MYL12BL2	10:50695728-50695743	ACCCAGTCCCACTGTGGACTTTCAGCGCACAGCCTCAGTAAAGGAACATTCATCTCTTGTAACCACAGCACCCCCACATGGCTTTTTATATTTAAAAGCACTTGCATATGCAGGTAGTAAAGGCTGACCATTTCCTTCCTCCCTGTCTCCTGATAACCGTGATGCTACTGGGAATAGAATCTTCCAGGGCGGCCGCCGCCGTCGCGCCGCAGCCCAGCCGTCGCCGCCGCCGTCGTCGT	AAAAAAAAAAAAAAAAAAAAAAAAAAAAAAGAATCTTCCAGGGCTCTGGCAACTGGAGGACATTGAAGTGAGTAATCCTCTTGACACACCCCTCCAGGGAGACAGCCATGTGGTATCCACAGCTGCTTCTAGCAGAGACACATTTGGAAACCAAGGTGTTAATCTGGCTATTTCTTCTGAGCAAGAGTGGGGGCAGTTTTGAGGAAAGCTGAGATG
MYL9	24:25322800-25329937	MYL9L1	11:26713228-26713245	NA	NA
MZT1	22:26862454-26880213	MZT1L1	12:61267554-61267568	AAAAAAAAAAAAAAAGGCCTGGATACTGAAAATAGTTATAACAATAATAAAACCTTAATCATGGAGCAGGGCCCCTCGGCCTCCGCCATGGCGAGCAGCAGCGGCCCCGGGGCGGCG	AAAAAAAAAAAAAAAAAAAAAAAAAAAAAATCATGGAGCAGGAGCTAGATGCTAACTACCTCTTTTAGCTAGAAGCTAAAAGAGAAGAACAAGTTAGATCTGAGGTAATAAAAAGATGCATTAGTAATAAAAGACCAAAATCAATTAACTAAAACATGGACAAAGATAAAAGAAAATCAGTAGAATCAAAATTCTTACTTTGA
MZT2B	26:30420222-30427393	MZT2BL1	13:48888192-48888192	NA	NA
MZT2B	26:30420222-30427393	MZT2BL2	23:420593-420611	AACAGGTGTGCATGGAGAAGCAGAATCCCTATTGTAATAATTTGATTTATCTCTGCAGAGGAATAAGTACTTTAGAATAATGTTGAAATATCTTCAAGTCATTCCAGTAACAGTCTTAACTTCTTGTCTTAGTTTCTTTATGTAGCTCAATGTTTTACAACTTTCTAACAATAGGGCGCGGCGGCGGCGGCGGCGGAGCGGCGGGCGCGGCGCGCGCCTCCCTGG	AGAAAAAAAGGGGTACAAAAGTGGAAAAAAAAAATTTTGGGAAAAAAAAAAAAAAAAAAAAAAAAAAAAAAAAAAACAACTTTCTAACAATAACTCTAAGAGTTACCGGCCTTCATTTCTTGAGGTAATTTAGGATTCTATTTTTCCTTCTCTTAAATGATGGCAGCAAAATTTAGGTTACTTAATCT
NAA20	24:3313028-3327972	NAA20L1	18:34191916-34191933	CCCAGCCACGTCCTAGGGTATCATATGGAAGGAAGAATCTGCCTTGGCTGCTGCTTAAGGCCATTGGCACCATTACCTTCTTCCACTAAATCCACCATCCACAACTCCTTTTCCTGTATAACTGCACCAGTGTTGAGTTTTTCCGTTTGTACTTATTTATTTAGGAATATGTTAAAAATGGTTTTACTTTCGATTTCCGGCGGGACGGGCGCGGGGTCGCAGGGAGCCGACTTGGGCGGCGGCGGCGCGATGACCACGCTCCGGGCCTTCACGTGCGATGACCTCTTCCGCTTCAACAACATTAA	AAAAAAAAAAAAAAAAAAAAAAAAAAAAAATGGTTTTACTTTGTTTTGCTTTAATGGCTAGTGCTTGTACATTTCTCTCTCTCTCTCTCATGTTTAAATTTCATTTGGGTTAAAAGGCCATCTTCTCTGGCTCCTTAATGAATAGAATCTGACCTTTTTGTATATCTTTATATCAGTTCTCAAATATACTGTTTTTGAATAGTGAA
NAA60	6:37759233-37784224	NAA60L1	1:27513246-27513261	NA	NA
NAB1	37:1207619-1243546	NAB1L1	17:25147248-25147265	NA	NA
NAF1	15:59430809-59470306	NAF1L1	8:13016121-13016121	NA	NA
NAMPT	18:14110045-14211268	NAMPTL1	1:54811672-54811689	NA	NA
NAP1L1	15:19141803-19165454	NAP1L1L1	14:33505589-33505603	TTACTTGTACTCTCAACATATATATAACAAAATCACCAGAAAACCCAGCAACTAGGACCATACTTTATTACAGCAATTATAATTGAAATGGAACACAATCTGGATAAATATTGAAGCCACTTAGTAGCAAAGGCTCCGGAATTCACTTAACTAATTTAAAAGGTAAGAGACTTTTTAGCGCCATCTGCTCGCGGCGCCGCCTCCCGCCTCCCGCCTCCCGCCTCCCGCCGCCGCCGCCGCCCTGAGTCACTGCGCAGCCCCGGCCTCGGATATTTGGAGTTCTTACAACATGGCAGACATTGACAACAAAGAACAGTCTGAACTTGATCAAGATTTGGATGATGTTGAAGAAGTAGAAGAAGAAGAAACTGGTGAAGAAACAAAAATCAAAG	TCCCATTTTTAATGAACTTAAGTAGCAGAACCCCTATTTTTTTTTTCTCATTCCTTTAGGTACTAGCTATTGCCAAAGTGAAGGGGGCAGATACTATTTCATCTTGTTATATAAAGGGGATGTGGTTTGCAGAGGAATTGTTTTCTTAATAAATTTGGCATTGCAAGGATATTAGTGTTTATCTATGCCATCTCTCCAGTTCCAAAATGGTTCTATTCCATTCTAGAAATTGAAATATGTAATTTGAAATCCTTAATAAAATTTGCATTTAATTTTATAAAATGTAAAAAAAAAAAAAAAAAAAAAAAAAATAAAAGGTAAGAGAAGAGTCTTGTGTGACTCAAAAAGAACACTAAAGTCAAATTAATCTGTGACTTTCTACAAGGTTATTAAAATGAC…
NAP1L1	15:19141803-19165454	NAP1L1L2	17:29923085-29923100	NA	NA
NAP1L1	15:19141803-19165454	NAP1L1L3	18:49079285-49079285	NA	NA
NAP1L1	15:19141803-19165454	NAP1L1L4	31:9914238-9914255	NA	NA
NAP1L1	15:19141803-19165454	NAP1L1L5	32:13158855-13158870	GGATCCCTGGGTGGTGCAGCGGTTTGGCGTCTGCCTTTGGCCCAGGGCGCGATCCTGGAGACCCGGGATCGAATCCCACATCGGGCTCCCGGTGCATGGAACCTGCTTCTCCCTCTGCCTGTGTCTCTGTCTCTCTCTCTCTGTGACTATCATAAAAAAAAAAAAAAAAAAAAAGGATGAACAAATGATCTTCACATTTTATTACTGCTTAACTTTTTGATCAAATCACAGGAAAACAAAACCAAAAAGTAAGAAAACAAAAAGAGCTGGTGCATTTAAAAGCCTTCCATAGCTTTTTAGCGCCATCTGCTCGCGGCGCCGCCTCCCGCCTCCCGCCTCCCGCCTCCCGCCGCCGCCGCCGCCCTGAGTCACTGCGCAGCCCCGGCCTCGGATATTTGG…	AGGAAATGGGAAGTGTCACCTTGTTTGTATCCCACAAAACAATATAGTCTTTGCTTTTACTACAATCGTGCATTGCTTCTTAACAAAGTACCTTCTGTCTACCGTTTTATGGAAGGCTTTTATTTTTTTTTTTTTTTTTTTTTTTTTTTTTTTTTTTTTTTTTTTTTTTTTTTTTTTTTTTTTTTTTTTCTTCTACTACTATGC
NARS1	1:18320941-18338185	NARS1L1	1:88216655-88216657	ACTAATATTTTGTTAAATGGGAAATCTTTTTAACAATATAAATGGTAAGTTATAAAATATTTTATGTTATATATTACATATATATTATATGTAAATAAATACAATTATAAACTAGGTATCTATTAAATTTACTAGTGTTTTATTAGGGTGCACGTTGCGGTGACAAGGGGTGCACGTTGCGGTGACAAGGGGTGCAC	CTCTGTCTTAAATAAATAAATAAAGTCTTTTAAAAAAAGGGAGGATGGAAGGACAAAATAAATTTTGCATACTAATAATTTTTATTTTTTTTATTTTTTTTTTTTTTTCCATGTGTGTCCATTTATTTGATTGCTGGGAATAACG
NARS1	1:18320941-18338185	NARS1L2	25:11157844-11157858	CCAATCCAGTCTCGGCGGCTCTTTATGACTTCACTCCCTTGAAATTTCCTAGGAAAAATTGGCTGTCCTGTTATCACCACAGCTGAAAGGGTCTCTTGGCATTTCTCTCTTCTGGTGGATTAACCACAGGGCAGGATTGGTGAAAGGGGGGGATATGAGGTTCATCTGAGTGGATTATGACTCAAGACCAATGTTTTATCCTATTTTAGTTTCTCTATAGAACCAGTTTATTTAGGAGTCTAAACTCGGAGCTGATAACTTGATTAACGAGGAGTCTGACGTGGATGTCCAGCTCAACAACTGACACATGATGATCCGGGGAGAAAACATGTCCAAGATCCTGAAAGCACGTTCTGTGGTCACCCGGTGCTTTAGAGATCACTTCTTTGATAGGGGGTA…	AAGAATGTCTGCTAGAGGAACCCTCAATAGGCTGTATTCCCAGCAATCAATAAATCGACACACATGAAAACTGAAAAAAAAAGGAGTCTAAACTCATATGTTTAAAACAGAAATGTTTAAAATGTTTTTCTAATAATTTTGTCCAACCAGCCTTGTCAAAATTTACCAGAGTGGCTCATTCATTATTGATATCTTTGTCAAATTTTATAATTC
NBN	29:35416093-35477569	NBNL1	12:1798945-1798957	TTTGTTTTTTATACAATCTGATATCCTGTGTCTTTTGATTGGAGAATTTAGTTCATTCAGAGTAATTATTGAAAGATATGAATTTAGTGCCATTTTATTACCTATAAAATCACTGTTCCTTTTTTTTGTTTAAGGTTTTATGTATTTAGCCCCCCCCCGGCCTCCGCCCCGCGGCCCAGCTCCCGGGAGCGCGCACGCCCGGAGCCCCCGCGG	TACATCAAGATTCCTCTGGGATACATTCATTAAATCTCTAGAAAGGATTTAAATTACAGAGGTTTTATGGCCTAAATTTGTTGAATAAAATGTACAGAACTCCAAAAAAAAAAAAAAAAGGTTTTATGTATTTATTCATGAGAGACACAGAGATAGAGGCAGAGACATAGGCAGAGGGAGAAACAGTCTCCTTCAGGGGGCCTGATGTGGGGCTCAATCCCTGGACCCCAGGATCACAACCTGAGTCAAAGGCAGATGCTCAACCACTGAGCCACCCAGGTGACCCTAAAGTCACTGTTTCTGCAGATTCCTTTCTAGTCTTTTTTACTTTTCAACTTTCTCTTAGCTCAAAGGAT
NCK2	10:37584351-37734388	NCK2L1	12:20387294-20387294	NA	NA
NCL	25:43330524-43384909	NCLL1	20:15318883-15318898	ATTGCTCTGCCTTCAATTTCCCTTTTATTACAGGAATTTAAAGCTATACATTTGTTTTTAAACCAAAATGCTCAGTATCATAGAAATCATTCCTGGAAACAGCTTGTTTCACATGCCCTGAAACTT	AAAAAAAAAAAAAAAAAAAAAAAAAAAAAACAAATGTATATAGCCCAATGTCCACATTAACTACAAGACATGGGATTTGCTTTCATAAAGCATGCAAAATTGTATGAGCTTGTACTATAGTTTACCATTTTCAGTTCTTCCTGTAATTATATATCCATTTGGCAAATATTTAGTAGT
NCOA5	24:33323645-33352835	NCOA5L1	1:8202838-8202848	NA	NA
NDFIP1	2:36978148-37065247	NDFIP1L1	25:21566119-21566135	NA	NA
NDST3	32:37309829-37487977	NDST3L1	15:16073668-16073668	ACCCCTAGTGGAGGAACCTGAAGAAAAAGGAACTTAAGCATTTGCCACAAGTACACAGCCAGTGGGCAAAGTTAAGACTAGAAACAGATCTATCCTTGTCATTTTCAGAAAACAGTGGTTCCTGGAGATTGGAACACAGGGATCGGGGGTAGAAAATGGCAGAGATGAGACCAGAGACAGCAGGCACCCCTTTGTACAGGCCTTTGGCTCTAAGTCCTTTTAAAAAGAGGATAGCCTTGGGGCGCGCGCGGGCGAGGAGCGGGGAGCGGGGAGCGGGGAGCGGGGAGCCGGGCGGGTCCCGGGGCCGCGGGGCGCGTGGGAGCGAGCGCACGAGTCCCCGAGTCCCCGAGTCCCCGAGTCCCCGCCCCGCCCGCCCCGCCCGCGCTCCGGCCCGAGTCG…	NA
NDUFA1	17:60181098-60181510	NDUFA1L1	17:51754197-51754214	CCTGTGGATGTGCGCCGTGGCTATGCCGGGGATGACCAAGCACACGGCCATGACGCCGATCCCGGGCAGAATCTCGAACCACATCGCACCGCGGTTGGCAGGGCCAAACCCTTCCTTCCCCACCCCCGGCAAAGGTCCTTAGCTTCTATATCTAATTTCATTTGGTTCCACTTCCTGGAAAATTTACAGTACCAATCTGTCTACTAACATTGAAGGTTGGCCCTAAGAATGGCACTTGAGGGGCAAGGTTTCTAATTAGGGATCCACGAATCCCCTAAATTTGTACTCAAAATACTGTACACAAATTTTTC	ACAATGCAGGCGAAGGAGGGAAAAACGACTTCCTCCTACCACCCACAGTTTCACATCTATGTACCAGGAAAGATATAGAAGCTAAGGTACAACTGGGGCTTTTTAAAAGAAATGATCTGATAGTTTTGAGAGAATTCTTTCCTGGTACATAGATGTGAAAATGTGGGTGGTAGGAGGAAGTCGTTTTTCCCATC
NDUFA3	1:103098639-103101226	NDUFA3L1	12:10985417-10985433	GCAGAATCACAGCGAGGCCCCCGATGGTGAAGGACGCGACCAGCACCGGCTCTTTGGCCCAGGCATCCTTGAGGAAGGCGGCGAGTCTCCCGGCCATCTTGGTCTCCTGTTTGGGTTTCTAACAACTGTTTCAGTCCCATGTCCTATTCATTCCATCTGTCCCCTACAAGTTCGCTAAATTAGCTGACTGTCCATTTTGCTTATGCCCTCCATGCCTCTACTTCAACAGAGATTTAAAACAAAACAGAAATGAAGCCACAAGGAGGTAGG	AAAAAAAAAAAAAAAAAAAAAAAAAAAAAAGAAACCCAAACAGGCTCACCTTCAGTGGAAATTTGGCATTCGTTGGCTAATTTGGGGAGTTCTAACCAACTTGCTACTAGAGACCCCACCCTAGGTCTTAGGAAGAGCCCAAACCCACGCCTTAGGTGTCTCTTTACTCTTGGTGATTCCACCAAGCTGTTTAGAGGCATGCT
NDUFA3	1:103098639-103101226	NDUFA3L2	35:10528342-10528357	CAAGGAATACAGCCACTCTCAGCTTTATCAGTCAGCGGGTGGAGTGATGAAGATCATGGATATGACATAGATTTTAAAAAGGTCTGATTTGTGGCTCCTAGAGAATCTCTCCAGTTTAAGCCCTACCTAACCTAAAACAAGTTTACATACTATACTCCCAAACAAAAACTTTAGAAAATCCTCTTTTGAGTCATATTAATTACAAAACAGATAGTTTTCCAGGGTTAGAAGCCCTGCATCCGGCCAGTGCGCATGCGCACTCAGATTGCGGAGCCTCGGGCGCGGGAACCACAATTCCCAGAGTGCTCCGGCCGCTTGCTGCCGCCGCCGCCGCCGCCGCCGAGACCAAGATGGCCGGGAGACTCGCCGCCTTCCTCAAGGATGCCTGGGCCAAAGAGC…	AAAAAAAAAAAAAAAAAAAAAAAAAAAAAAAAAAAAAAAAAAAAAAAAAAAAAAAAAAAAAAAAAAAAAGAAGCCCTGCATCCTCCCTGAAAATATAGACAACGGCTTCATGTAAAGAGGCACAGATATCAAGGTGAAAAAAAATTTTTTTTTAAATCATTATTTCCATGTATCTACTCACTGATGGCACATGATCAACTAC
NDUFAF4	12:55311482-55319879	NDUFAF4L1	2:6242423-6242444	CATCACAGAATTGACCTCAAAACTAATAACACAACCTTCAATGTTTGAAATATGATATTCTTTTAAAAATTTTTAGGTCAAAAAAGAAATCACAATGAAAATTAGAACATTTTGACTAACTGGTCAAAACATAATAGGACATAAGAAAACCTATGAATTACAGTTAAACTCATTTATGAGTAGAGCTTATAGCTTTAAAAGAATACATTAAAAATGGCCCGGAGGACGTCATGCGGTGAGGAGATGGGGGCCGCCGCGGCTCGCGCG	AAAAAAAAAAAAAAAAAATAAAAAAATACATTAAAAATGAATAAGGGCAAAAAATAAATGATCAAAGACATTATAAAAATATAAAAAAGAAATAGCTAATAGAAACCTAAAGGAAATAAAGGCTAGAAATAAAATAAAGGGGGGAAGCAATCA
NDUFAF4	12:55311482-55319879	NDUFAF4L2	X:4998499-4998514	GAGGGGAGGAGGGAGGGATGTGTGAAATAGGTGATTAAGAGTATACTTCTCATGATGAAACAAAAATGATTTAAAAAATCAGCTTCGGCGTCCGCGAGGTCGCCGGCG	TAAAGTACTTCCCAAATCTTTCAAAAAAAAATAAAAATAAAAAAAAAAAATAAAAAAATAAAAAATCAGCTTCATCAGATAAAATAGTCTAGCTCTGAAAAATATTTTTAAAGAAGATAATTACACGTGCAATATAGCGATCTATTCTTGGCTTTTTAAAAATTAATGTAAAAAATAAAGGGTACTTTTTCTGTAAGACAGTATTTCCTTATTCATATACTCTTTAATGAATCTAGTGTCTCTGAATACTAAGTATTTTTATTCTGCAGAAGTGAAGATTTTCAGATTTTTTAAA
NDUFB11	X:40744408-40746831	NDUFB11L1	6:49242398-49242411	NA	NA
NDUFB4	33:24044498-24051545	NDUFB4L1	9:25122526-25122543	NA	NA
NDUFV1	18:49882844-49888448	NDUFV1L1	5:55112686-55112699	AGGCTGAGGAACCGGCGCTCCCGAGACCACAGGTTTTCTTAACTGCCTGGAACGAGTAAGTCTCCCAGATTTTGCTGAGGGTCTCTGTGCCAGTGTTGCCTCATGCCTTCAACACTCCGTCACACAGTGGACGGCTCTCTCTTGGCCTCGCT	CGCACCGAAAGCCCTTTGTCCAAAGGGCGGGAAAAAAAAACAAGCGGTCCCCACAAAAAAAAAAAAAAAAAAAGAAAACCTGTGTAATTATTAGCTACCCACTCAAGCAACCAAGCAGAGACTTCAGTAGTCACACACAACAAAGAATACAGATCTTACAGCATTAATTCAGAAAAGTAACCATGTGATCCAGCAATGTTACTCTTAGGTATAGAAAAACGAAAGACATGTTCACAAAACTTGTACGTGACTGTTTATAGCCGCGT
NDUFV2	7:75150293-75184084	NDUFV2L1	5:78075238-78075252	GGGCTAAATCCAGGACTGGAAGCACAGCTGCTGCTTTATGTCCTTCTGGATAGTTTTTTATAATTGCCTCTATCCTCTTATAGTTTTCTGGTGTGAAATCAAATGGAGTATCTGGGTTATTCTCAGGAGTATCTCTGTGCACAAATAAGGCTCCTCCAGCTCCATTCTGTACAGCTGTCTTATGTAAGTTCCTTATATATCTTCCCCACTGGGCGGTGAGGCCAGCCGCCTTGGCCCGGACAGCCGCGGAGAAGAACATGGCGGACCGCACCGTCGGCCTTTCCCGGCGGCACCGGGCGAGAGTCGCGAGCGAGCCTGGGACGCACTCTTATGACAGTTTATACACACTTTTATGGATCTGCCGGTTCATCCTGTTGTCATCAGGTGGCAGCCGTGCCA…	AAAAAAAAAAAAAAAAAAAAAAAAAAAAAAAAAAAAAAAAAAAAAAAAAAAAAAAAAAAAAAAAAAAAAAAAAAAAAAAACTGTCATAAGACCTGAACCTATACTAATCTTCTCAATGTAATTATTCCTGCTGCTTCATTTTTGCCTTCCAAATACGCAAATTTCTCTGTGGCTCCTCTTAGCCTACAATCACATAAGGAAGGGAATTCTAAGGAA
NDUFV3	31:37118201-37131035	NDUFV3L1	1:112546558-112546564	NA	NA
NDUFV3	31:37118201-37131035	NDUFV3L2	2:11923409-11923425	NA	NA
NECAP2	2:81275294-81289405	NECAP2L1	10:50576751-50576765	NA	NA
NEDD4L	1:17629163-17858471	NEDD4LL1	10:44401413-44401429	NA	NA
NEK7	7:4557754-4755912	NEK7L1	8:33345369-33345384	NA	NA
NELFE	12:1406411-1412387	NELFEL1	11:14497296-14497312	CTGATAGTCTTCAGAAACAATCAAGCATCCTCCATGACAGGAGGAGGCATGTATCCTATCTGCAAAGCAATTCCACTAAATGGAAAGGGGCCTGGGAGAAAAAAAAAAAAAAGATAAATGAGAGCCCTGTCATCTATAGAATCAAGATCAACAAAAGCAGTAGTGGAGACCGTGGGCCCCCGGTTACCGCCCCCTCAGGAGCCACCATGTTGGTGATACC	AAATGCTTTGTCCGCTTCCAGGGGATTTATGGAAGCCAGATGGCGGCCAGTTACCAGCCATAGGGGTGGAAGTTTTCTCTACTGCTTTTGTTTTTTTTTTTTTTTTTTTTTTTTTTTTTTTTTTTAATATTTTTTTGG
NET1	2:30450946-30463280	NET1L1	37:29306415-29306435	NA	NA
NFU1	10:68134865-68161841	NFU1L1	11:68039588-68039700	NA	NA
NGRN	3:53209206-53214629	NGRNL1	15:3851190-3851302	NA	NA
NHEJ1	37:25637214-25719241	NHEJ1L1	24:4191053-4191069	NA	NA
NIP7	5:80287699-80316275	NIP7L1	2:27394472-27394487	NA	NA
NIP7	5:80287699-80316275	NIP7L2	8:18500464-18500480	CCCATTTAAAGTTGCCTCATGATTACTTAGAGGTTCAGGAATCTCCTGTGTTCCATGCAGGTAAAAGCAAAAGGCTACTGGGAAGAGATACAAGCCCGATGAACCACCCACCTCCCCCTTTGCTTTCAAAGAGCATTCCTGATACTATGCTCAACAAAATTATATTAAAATTTTACTGGGTGGACTTCCGCTTCCGGCCCCGGGGCCCGCGGATCCGGCGCTGCGACC	AAAAAAAAAAAAAAAAAAAAAAAAAAAAAATAAAATTTTACTGGGTTGACCAAAAGAAGAACTAAGAGGAAAAGAAGGAGGAGGGGAAGAAGGAGACAGAGGAGGGAAATGTAGTTTTTTCAGCTGTAAAGTTGTTTCCAAAAAAAGAACGTATTTTTAAAAAAAAAAAAAAAAAGAGGTGAGGATAATATCAACTTCTGTAGGTTATGCCTTTT
NIPA2	3:32051313-32095379	NIPA2L1	12:46390284-46390298	TTTTGTCTTCTCGACCTCTCTCCCTTTCCTGGAGAGCCACCACAAACAGAGAAAGCAGCAAACATACAATAAATGGTGACTGAATTTCACATAGATTAACCAGAGACTGGTCTCAAGGTAAATGTACTAGGCTAGTCATACTACTTTTCTAGAGTTGATAATACTTTTTGGTAACTCTAGTCCTGCCCTATTGCACTACCATCACTTCTCTCTCATGAATACGTGGCTGGGCGGCGGCCCTGGGTTCCGGCTGCGGCGGTCGTCGTAGGTCGTCCGGGGCAGGTTCCCCTGGGCGCTCCCCCATGGAGGAGGCGGCGCGCGCGGCTGCAGCCCCGAATGCTCTCGCTTCTTTCTGTACGGCGACGAAGGCCCTGGCCGCGCGAGCTCGAGAGGCGGCGG…	AGAAAAAAAATAAGAAAAAAAGAAAGAAGAAGCAGCAAGAAAAAAAAAAAAAAAAAAAAAAAAAAAAAAAAAAAGAATACGTGGCTAATCTTCTGCTTTATTTCTCCTTCTGGTAACAAAGCGTCTGCCCATGGAATAATCACTAGAAGAAGTCCTCTGTGTTCAAAGCAGTATTCCTAGGTTAAATATTTGTCCAT
NIPA2	3:32051313-32095379	NIPA2L2	16:13569030-13569045	NA	NA
NIPA2	3:32051313-32095379	NIPA2L3	38:19250878-19250883	NA	NA
NIPAL2	13:427216-493861	NIPAL2L1	26:31755277-31755285	NA	NA
NIPSNAP1	26:22785902-22800241	NIPSNAP1L1	1:15380763-15380778	CATTGTGAAACTGGATCTTGTAGAGGTTGCTGGTTTCCTTCTTGGATAGCAGGGTGGAGTGGGCATCCTTCCGGGGATCCACCTTGTGCACAAAGAGGGAGCGGAACCAGCTCCCTTCATTGTCCTTGGAATAGAAGCGCGCAGCAGCCGCGACATCCCCGGCGCGGGGCTTCGGGCTCCCCAGCAGCCGCCGCGCCGCCGCAGAGGTGCTGCACAGCCGCGGAGCCATGTTGGAGCCTACCTCCATGTTTTAGATGTATTTATAAAAACCTGTAGTCAAAGCTATCATATACAGGATATTTTCCTGAAGGAGTAGTGTAGATTTCCTATCATACTCTTTATCACTTTATTTTATAAAGTCAACATCTTTGAATCCCTTACCAAGTCCTATTATGTGGC…	CTACACCTCATGAACCTCTAGGTCGCTTGATTCTGTTTCCCTTTCAGGAAAACTTGTAGTGGAGTCACTGATGGAACCAATTAAATATTTACTATAAAAAAATAAAAAATAAAAAAAAATAAAACATGGAGGTATGCTCAGGTGCACACTTAAAAATGTCTATTCAAACAATTTATATCAATTACTATTTAATTAATAAACTGCATTGTAATTTGTTGGTGGAAAGTGGAAACCAAAGTTTGGTTCCATGCAAAGATATCTGCTAGAGAACAAGAAAGCTGCGCTGCTCATCTTTTCATGCTATTTTGACCACAACCTCTAACTGACTGAAACGTCC
NIT2	33:6944340-6960540	NIT2L1	3:79630633-79630650	AAATAAATGTAATATGCTAAGAGAAAAGCAAAATGCAATAATTTGAAATGATCAATTAAAACTAGAGAAGACAGATGAAGAGGAAAAATGAATATGTAAAATAAAAAACCCTTAAGATGATAGATTTTAATCCAACTATGTCAATCATTTTATCATAACTTTCTTATTGAGGCGCGGCCCCGCCCCGCGCCGTGCGCCGCGTCGGTCGGTGGGTCTG	AAAAAAAAAAAAAAAAAAAAAAAAAAAAATAACTTTCTTATTGAGATATAATTTACATATAACATGCCAGTGTCAGGTATACAGAATAATGATTCAGTATTTGTATATATTGTGAAATGATTGCTATAATAGGTCTAATTAATATCCATCAAAGATCATAGTTAAAATTTATTTCCTTATAATGAGAAATTTCAATATTTAC
NKIRAS2	9:20851014-20854953	NKIRAS2L1	27:36868393-36868408	TCGGCCGCTCCCGGGTCCTTCCAGGCTCCGACTGGCCCCGCCCCAATAAATCTTTTTAAATAAATAGATTAAATTAGTTTTACCTATTCTTTTAATTTTTTAAATATGGCTTCTAAGCATTTTGAAATTACCTATGTGACTTGCATTACATCT	TTCCTCTGCCCCTCCCCCTACTTGTGCATATGTCTTCTCACTTTCTCTCATAAATCAATAAATCTTTTTTTTTTTTTTTTTTTTTTTTTTTTTTTTTTTTTTTTTTT
NKX1-2	28:33806298-33811258	NKX1-2L1	19:19315035-19315048	TAGTTCAGCAGAAGAAGAAACATTAAAGTTGTAGTGTGTGAAATTGCATAGTATAGAATTCTCTTTAAAATGTAGAGGGAAACTCAGTACTTAGTCCCCTTGTCGTAT	TTTTATCAGTAGGCTCACTGGGAGTACATTGTTGCCTTAACCTTACCACCAAAGTTTCATGGAAGGACAAGGAAAACATCTTGTGTACCTGAGTTTCCTTTCATGTGGATTGCTTACCCCATACCTTTTCTGTTGGGATATGCCAATGGAACTAAGTACTGAGTTTCCCTCTACATTCTATTTTTTTTAGTTACAAAAAAGGATTTATTAGACAAACACATCAATAGATGGAGT
NME1	9:26990336-26998691	NME1L1	5:42582380-42582396	AGTCTTGAAGAACAAGAAGGATTATCCAGATGGGGAAAGAGAGGGAGGGTAAGAGTGTCCCATTAAAATTGCCTCAGTTGGGCGCCAGAAGGAGTTGCGGCGGTAGCAGCTGGAAA	ACTGGAGTTCAGACGTGTGCTCTTCCGATAAAAAAGTCTTGAAGAACAAAAAAAAAAAAACAGAAAGAGAAAAAGAAAAAAAAAAAAAAAGTCTAATTTTGCCTCAGTCATGGGACACCTGGGTGGCTCAGCAGTTGAGCCTCTGTCTTCA
NME1	9:26990336-26998691	NME1L2	9:4636234-4636250	TTGCCCTAACAGGTTTTTTGTTAACTAGGCTCCACATGGGTGGAGAGAACAGCTCACAACCCTGAGATCAAGACCTGAGCTGAGGCCAGAAGGAGTTGCGGCGGTAGCAGCTGGAAAGGACCATGGC	AAGAAAAAAAAAGAAAAGAAATCCAGAGTGCCTGAGCTGAGATAGTGAGATGCTCAACTGACTCAGCCACCCAGGCACTCTGGATTTCTTTTCTTTTTTTTTCTTTCTTTTTCTTTTTTTTTCTTTTTTCTTCCATGTTCTTTATGCTCTCTGGGCATGTCAACAAAC
NME1	9:26990336-26998691	NME1L3	11:15609994-15610010	CACACACACACAACCGTATGTTGATTCTTTACATCTCAGGCACTACCTGACCTTAATTTCCAACCACAAGAAAGGAAAATTGATAGAAGGTCAAAACAATGTTTTCTATAATGCACTGAAGCTTGGTTTCTGTTTAGAATTTCTCCTGTAGGCCAGCGGCGCCAGAAGGAGTTGCGGCGGTA	AAAAAAAAAAAAAAAAAAAGAATTTCTCCTGTAGACACTGAAAACATGGTCAGGAATTGGTGATGACATTGTAAGCAAGTAACAATAATAGAACTAAATAATAACAGAACTAAAGAATTCCCCCCCAAAATGATTATTAAGCCACCT
NME1	9:26990336-26998691	NME1L4	15:17900976-17900991	TATAAGTCCACATGTCTTCTTGTCAAGTGGTGTAAGAAGCAAATGATTATATAGAATTATTGAACCAACATGTTGTACATCTAAAACTAACACTGCATGTCAATGATACTATAATAATAATAAAATAAGAAATGAAGGATAAGAAGATTGGGGAAGTGAACAATGGATCTGGTGGGCTTAAGTAGTGAAAAATGTGTTAAAGAAAGAATATGGGCCAGAAGGAGTTGCGGCGGTAGCAGCTGGAAAGGACCAT	TAATATACCCTACTCTGGCTCTCCATTTTTGGCCCTTTCATGACGGTCTACCCTTTTCCACCTCTTCAAAGTCCAATTCAGATCATATTCTTTCTTTTTTTTTTTTTTTTTTTTTTTTTTTTTTTTTTTTTTTTTT
NME1	9:26990336-26998691	NME1L5	16:34800972-34801160	CCGCCATCTTGAGTTGCTCACTCTCGTCCGCCATCTTGAGTTGCCTATTTTCTTGCATATAGAGCAACTTATTTCATGCTAATATCAGGTATTTAATTAGCTGAGCACAATGAGCCTGCTTCCCTCTTGAACATGTATGGACAGGATATCAGCAGGGCTCCTCTGAAGAATTAACCGTTGGGGCAGAAACTGTTAGTTTCCCCTTCCCCTTTGGCACGAGAACCC	AGTGTTACTAGCCACGCTCATCTCCTCTCATTTTCCCAACATCCTGTGTTTCCCCCTCAAGCATTTATTTTTTTTTTTTTTTTTTTTTTTTTTTTTTTTTTTTTTTTTTT
NME1	9:26990336-26998691	NME1L6	21:42250401-42250413	NA	NA
NME1	9:26990336-26998691	NME1L7	36:21107744-21107764	AAGAAAGAAAGAAAGAAAGAAAGAAAGAAAGAAAGAAAGAAAGAAAGAAAGAAAGAAAGAAAGAAAAGAAAGAAATCCCATAGAAATTAAACTCTGAGTTTCTTCCAAAAAGAGGAAATGTGGGGGTTTTTCCGGTGCCGGCGGCGCCAGAAGGAGTTGCGGCGGTAGCAGCTGGAAAGGACCATGGCCAACAGGGAACGCACCTTCATTGCCATC	ATAGTAAACAACAAAAAAAAACTCAAATATCTAAAACAAAAAAAAAAAACAAAAAAAAAAAAAAAAAAAAAAAAAAAAAAAAAGAGGAAATGTGGGGGCACCTGGGTGGCTCAGTGGTTGAGCGCCAGTCTTTGGCTGATCCTGGGGTCCTGGCATCGAGTCCCACATCAGCTTCCTCGCAGGGAGCCTGCTTTTCCCTCTGCATCTATGTCTCTGCTTC
NME1	9:26990336-26998691	NME1L8	X:123251288-123251487	NA	NA
NMRK1	1:83140816-83163292	NMRK1L1	23:3663554-3663554	NA	NA
NMT1	9:18422103-18462612	NMT1L1	16:2661424-2661430	CTAAAAATGAGGGTTCTCGTGCCAAAGGGGAAGGGGGAACTAACAGTTTCTGCCCCAACGGTTAATTCTTCAGAGGAGCCCTGCTGATATCCTGTCCATACATGTTCAAGAGGGAAGCAGGCTCATTGTGCTCAGCTAATTAAATACCTGATATTAGCATGAAATAAGTTGCTCTATATGCAAGAAAATAGGCAACTCAAGATGGCGGACGAGAGTGAGCAACTCAAGATGGCGGACGAGAGTGAGACAGCAGTGAAGCCGCCGGCACCTCCGCTGCCGCAGATGATGGAAGGGAACGGAAACGGCCATGAGCACTGCAGCGATTGCGAGAACGAGGAGGACAACAGCTACAGCCGGGGTGGTTTGAGTCCAGCCAATGACACTGGAGCCAAAAAGAAG…	AAAAAAAAAAAAAAAAAAAAAAAAAAAAAATAAATGCTTGAGGTGGAAATACAGGATGTTGGGAAAATGAGAGGAGATGAGCGTGGCTAGTAACACTTGTCCGCCTGCCTTTGTCAGCCCCGAGAAGGGTGTACCTCCACTGCAGGTAGATGCTGGGCGTCAGGCGCTATAATGGTCCCCAAAGATGTTCAGGTCCTAATTTCC
NMT1	9:18422103-18462612	NMT1L2	18:53055809-53055826	CATCTTCACAGGCTGATCCTGGGCTGAATCTGTCTCATTGCCTTTCTCTTTCTTCTTTTTTTGTTTCTTTTTCTTCTTTTTGGCTCCAGTGTCATTGGCTGGACTCAAACCACCCCGGCTGTAGCTGTTGTCCTCCTCGTTCTCGCAATCGCTGCAGTGCTCATGGCCGTTTCCGTTCCCTTCCATCATCTGCGGCAGCGGAGGTGCCGGCGGCTTCACTGCTGTCTCACTCTCGTCCGCCATCTTGAGTTGCTCACTCTCGTCCGCCATCTTGAGTTGCCTATTTTCTTGCATATAGAGCAACTTATTTCATGCTAATATCAGGTATTTAATTAGCTGAGCACAATGAGCCTGCTTCCCTCTTGAACATGTATGGACAGGATATCAGCAGGGCTCCTC…	GGGCTGACAAAGGCAGGCGGACAAGTGTTACTAGCCACGCTCATCTCCTCTCATTTTCCCAACATCCTGTATTTCCACCTCAAGCATTTATTTTTTTTTTTTTTTTTTTTTTTTTTTT
NMT1	9:18422103-18462612	NMT1L3	32:1453504-1453518	CCTTTCTAAAGCTCCCTATGAATATCTCATTCACCAGCTTTTCCTTTCAAGGTTTTTGTTCAGCTTCTTGTTTGTCTCCATTGTTATCATTGATTCAGGCAGCTGTGGTGTTAAAGAATTGCTATTGATTGTTTTTGACAAATGTCCCTGGGGAAGAAGTTCTGACTCACTTCAAATTAAGACAAGGCCTTGGAGGCCGGCTCTCGCAACTCAAGATGGCGGACGAG	AATAGGTTGAGAACTCTCCAAAACACCATTCTCAGATAATGTCATTATTTAACATATCTGGCAATTTCCTGGAATTCTGTTTTTTTATGCCTTGTCTTTTTTTTTTTTTTTAATATATATATATATATACTTTTATTATTCACCCGTTAACTCC
NNAT	24:26119153-26121573	NNATL1	36:28808394-28808407	CGGTTCGCCGAGGTCCGCCGATCTCTCGGAGTCCGCTGTTGGGCGCACTCTATTGTTGCTGTTATTTGGTGTGATGATAAACTTCTAAAAGAAAAAATATCCACATCATAAAAAAAGTATTTGCTAATTAAAGGTTTTTTT	GTAAAATTATGCTTAATTTTGTAAAAGATACTTTTAAACTTAAGCACTGAGGATGCATCCATTTATATTAGCAGCTGCGTTTATTGTTGCTGTTTTTTTTTTTTTTTTTTGTTTTTTTTTTTTTTTTTT
NOL12	10:26919771-26926547	NOL12L1	38:17193106-17193124	NA	NA
NOL4L	24:21808726-21939596	NOL4LL1	11:8337150-8337166	NA	NA
NOP10	30:766801-767615	NOP10L1	24:4966791-4966798	AATGTGGTGTGGGCTTAGGGAAACGAGAGGGCACACAGAAGGGAGACCCAAACCATGCTGGGAAGATGGTAGAGCTAGAAAAAGTGGGGTCTACAGGAAACCTGAAGGATGACTAGAATTGGCCAGGTGAAGAGGGGTGCCTGTGTGTATGGCAGGGAGGCCACAGGGGCTGGAGAGACACATATTCCAGAGAAGAAATTAAGAGATTGACGGCGGTGGGAGTCGCGTGTGCAGCGTGGTCATGTTTCTCCAGTATTACCTC	AAAAAAAAAAAAAAAAAAAAAAAAAAAAAAGAGATGCTAAGATCTTAGGATAAGAAAAGAGTTGTTTGTGGAGAATTAAAAGCGTACTCTAATACAAAGGTCGGGTTGTGTGGGGAAAGGACACCACACAGAGAAGCTGAAGAAGTTAGCAGGGAGACAACTGTGAA
NOP53	1:108307039-108315732	NOP53L1	1:19075841-19075857	NA	NA
NOP58	37:11255562-11287325	NOP58L1	27:6170110-6170348	NA	NA
NOX4	21:10615153-10782927	NOX4L1	7:26345057-26345073	TGTTATCCAATGGATTTTTGTTTCTTTTATTGAAAAACCTGTTAAACAGTGGTAAAAAAATAGTTTTAAATTCTTTTAAAAAAAAAAAACCCCTCTCTTGTGTTCTTTACTCTCTCTCTTTTTTTTTTAATTTTTTATTTATTTATTATAGTCACAGAGAGAGAGAGAGGAGAGAGGCAGAGATAGAAGCAGGC	ACTTGAAGAGCTATTATTCACCGCCTCCGAGCTGCTCCGGGTCCCGGGTCTGCGGCCAAGAGAGGGGTTTTATGTTGACCAAAGATGCTCACTGTGCCAAGGAATTTAACCCAACTTAAGAGTATAATGATTGATACCTGAGGTCCAGCAGGAGCAGAGGCAGAACAAGGTGGGTTCCTGCAGAAGGGGCTGCTGGGCAGGAAGCGAAAGGAGGAGGCAATGCTAATCAGGTGGGGTAAACACAGCTCTTGCCTGGAGAACAATAAAGGAGAGATTAAT
NR2F6	20:45490113-45500606	NR2F6L1	29:4578373-4578390	CGTAGGATGGTGAAATGGACAAAAAAAGCAAGATCCATCAATATGCTGCCTACAAGAAACATATTTCAGATTTAAAGACACATGCATGTTGAGAATGAAGGGATGGAGAAACATTTATCATGCAAGTGGCATTGAAAAGAAATTCAGGGAGACCTCTTCCCGGGGCAGCCGGTGTCGGAGCTG	AGGCTTTTCTCCCCCCAAAAAAAAAAAAAAAAAAAAAAAAGAAAAGAAAGTCAGGGAAACAATACTTATATTGGACTAAATGGACTTTAAAACAAAGACTCTAATAAGAGACAAAGAAGAACATAATATAATTATAAGAAGAAGAATCTAACAAGAAGATATAACAATTTTAAACATTTATGCACCCAACAAGGGAGCACCT
NR6A1	9:58385981-58485003	NR6A1L1	1:72191012-72191012	NA	NA
NRSN1	35:22216835-22237398	NRSN1L1	4:12729546-12729561	TGGTCTTTATAAAAACATGACAGCGCTCTCGATGACTAGTACAATGGGTTTTACCAAGAGAGGCACATGTTTTATGACTGTGTGGAGAGTGGACTGGACAGGGGGACCAGAAAGGAGAC	AATGGGAACAGAATAAATGATAAAGATAGGAACCAAAAGGGAGGCAGGACTGAAGTAAGGCCTTGGTAAGAATATAAATGCGATGACTAGAAATTTGTGAC
NSDHL	X:120720118-120754573	NSDHLL1	14:35081891-35081910	TAAATTAGGAGCAATAATTCTATTATCTCTAATCTTGTAAGGATTACAGGTCATATAGAGAGTTAATAACATACTAAGTCCCAAACTGGTAGTCATTATGATCTTATATCGCTGTTGTTCAATACTCTCATGTATTCAACAAATAATTACTGAACAGAGAAAAGGGAGACCGCCAGCGGCC	AATAAATAAATAAAATCTTTTTAAAAAAAGAAAAAAAAAAAATAATTACTGAACATCTGCTGTGTTGCCAGGTATGGTTATAGACACCAGTGCTTAATAACACCTATATTGCACATCTGTATCTTTTATAAGAAAAATACTCATGTATGAGTTGTGAATAAGTGTATACATAGCTCTTTTCAAAATCTTTCTTTCTAGATGGACACTACTCCTTTTTCAGCTTTATTATAA
NSMCE1	6:19330815-19363240	NSMCE1L1	3:54607067-54607086	NA	NA
NSUN6	2:18477150-18534716	NSUN6L1	4:47479126-47479141	NA	NA
NT5DC2	20:37241251-37249872	NT5DC2L1	1:88527505-88527505	NA	NA
NUBP1	6:31900540-31922087	NUBP1L1	34:32146130-32146144	GAATATTCTAATATAATAATGTAAAACTTTTACTTATAATATTCTTGAAACACTTGGGGGTTGGAGACAAGAAAATAGATAGTAACTCTACTTATTAGATTTGAAGGTGGAAGAAGAAAGATTTGAAGCTGGAATATCTCCTTTAAAGGTCAATTTAAAATGTTTTCACGGGGTTCCGGTGACCGCGCAGACGTCGAAGGCGGCCGAATGGAGGAGGCTGTCCCGGGACCGGCAGCGCCCAGGCGGGCCGAGGGGCCTCATGTCAGGGCTGCCCCAACCAGCGGCTCTGCGCTTCCGGAGCCGGCGCGGCTCCCGACCCAGCCATAGAAGAAATCAAAGAAAAAATGAAGACCGTGAAACACAAGATCTTGGTGTTATCTGGGAAAGGTGGTGTTGGAA…	ACATATTAAGAAGAGGGAGGTAAATTTAAAAAATTTTATTCTAAGAAAAAAAGATTCTAGGTTAAAAAAAAAAAAAAAAAAAAAAAAAAATAACATAAAATGTTTTCACATAGATCCTGGGACTAAGAGAAATGGTAAAAAAATGAAAGCCATAAAATAGCAGAGGTTATGTTTGAGGGATTGGAAGACTAAATGAAGATAGTCTTGTCTAAAGGGTCCCATTT
NUDCD1	13:9815394-9895410	NUDCD1L1	2:50189653-50189669	AAAGGCGATTGTCGCATGCTGTCAAATCTGTGGGAAGTCGAAACACCTCTCGTGGCTTTCCTAAAGCAGTGTCCAGCATCACTGTTAAATTCATAACTCTTCCAAGGTTATCAATGTAGTAGACACTGTCTTGATACCATGAATCACAGTGTAGGTAATTATACATTCCAAAAGCATGCATGTGTTCCAGTGTATATTGATCATCTCGAAGTTTTACTTCTGCCACAGCTGCGTCAAGCTCCAGCTGGTAACAGGGCAAAGGCTCGAGGGAGAGCTTGTAACCCTCGAAACGGGGATCCAGCAGAGGTCTCTTCACGCGCAGAGAGCAATTAGCAGCCACCTCCATAGCCTTCCTGGGTCGCAGCGAGAGAATTAATAAAGCTCTTGTTGAAAGGTCCG…	GTGGTAAGAGAACAAAGAAGTGTGTGTGTATGTGTGTGTGGGTGTGTGTGTGTGTGTGTGTGAACATGATACAAATTTTTATCCATACATTTTTTTTTTTTTTTTTTTTTTTTTTTAAGTTTTTTAT
NUDCD1	13:9815394-9895410	NUDCD1L2	6:29511513-29511527	NA	NA
NUDT12	3:7693903-7708930	NUDT12L1	36:6746242-6746255	NA	NA
NUFIP2	9:43380048-43411597	NUFIP2L1	5:43076704-43076722	ATGGTTTGACAGTTTGCCTCCTGAGTAAACACATACCACAGATTCTGTATCCACCTACTTCCTGTATAAGCAAATTAGAACAAGACCTGGTAAGCCTTAAGAGTTTATGGTGAGTCAGATCCTGACGGTGCCGCAGCCCGCAGCCTCAGCCAGGGAGTCCCCAGCCGCTTTCAATGGTCGGGG	CTACAGAATATTTAAAAAAGAAGAAAAAAAAAATTTTTTTTTTTGTGGGGGAAAAAAAAAAAAAAAAAAAAAAAAAAAAGAGTTTATGGTGAGTCCAGCGAAGCCCAGAACAGGTGTCCATATAAGTATATCTCACTTGACACAGTCTAAGTTGGAATGGCTCTCCAGAGACATATTGCCAATTTCCCTTGT
NUFIP2	9:43380048-43411597	NUFIP2L2	28:12881514-12881530	ACTCCCTGGCTGAGGCTGCGGACTGCGGCACCGTCAGGATCTGAGCTATACTCTGTATTTTAAAACAAACTCAAATCCAGGAAAGAGTCACTAGGAAAAAGGTTGAAAGATCTATGAATGTTTTGCATGATAAAGAAACCACATGAGACTTCTGTTTCAATGTTAGAAAAGCCACTGTGAAGAAATGACATCTATCTAAAAAAAAAATAAGAAC	AAAAAAAAAAAAAAAAAAAAAAAAAAATACAGAGTATAGAATTAAACACAATACTCTCAATACAGAGCAGTGTAACTTCTACTCCCTATGAGCTGAGAAGCTCATGCTCTTATTATATAAAATAGCCTAAAATTGTTTTCATGTTTCATCATGCTATTTTAAAAAATTAAGCTGTGGTCAGCTAAAACCCTCTGATGGTTTTTCATATCA
NUP42	14:36865737-36887682	NUP42L1	11:19964865-19964882	NA	NA
NUP54	32:751568-782342	NUP54L1	28:14282437-14282451	AACTCTGACTCCAGCCTCACACCAAACACAAAAACTAATTCAAAATAGATTTAAACATAACATCTGAAACTATAAAGCTGATAGAAGAAAATATATCAAAAGATCTCTGCAGCTTGGGGCTAGGCAAAGGTCTCTTAAGACACAGAAAGCAATAGCATAAAAGTCAAGTCTAGAGGCGGCTCTCGGCGGGACTGAAGAGCGGCGCGCACCGAGGGTCGTGGGGGCGGCGCCTGCGTCCCCTGCTCGCGCGACATGGCCT	AAAAAAAAAATTAAAAAAAATTATTTTTACTTAAAAAAAAAAAAAAAAAAAAAAAAAAAAAGTCAAGTCTAATAAATGAGACTTTATCAAAATTTTAAATTTTGCTCACCAAAATTAATATACACACCACCATCTGGGGGGAAATGTAT
NUS1	1:57866760-57895505	NUS1L1	10:56306874-56306892	NA	NA
NUSAP1	30:8358737-8435039	NUSAP1L1	1:108662656-108662671	CATCATGACTATACATAAAGCCTCGCATTGTCTGATACGTTTGCATGTCATCGTCAACCTGCGAAGACCCATCCAGCTGGGAATGCAAACTCTGGTCTGTTTGGACAGTTCCCACTGCACAATCATGCAGGGTCATAAGACAAACAACCAAAGCAGTCTGTCTTCATTTAAAATCTGGATGTTGAAAAAGAGCGAAGATGGCGGAGTGAGACGTTCCGCTGCCAGCCGGCCGTTG	AAAAAAAAAAAAAAAAAAAAAAAAAAAAAATAAAATCTGGATGTTTTTTCCACCATGGGTATATTTGGGAGCATTGATTTTGGTTCTTTAAAATATTGTATCAAGATATTATTTCTTGATGACTGAAGGGTTTTTAAAAGGTTTTTAAAAAATATTTTATTTATTTATTCATAA
NUSAP1	30:8358737-8435039	NUSAP1L2	12:5648093-5648109	GTTTATAGACTCTGGTATTTCATGCTTTAAGAAAATCCAGAACACAAATGTCAACATTTCCAAAGCAAATGAGGGAGTGGCTGTTTGTATTACAAATGAACCTTGCAGGAAGATGGCGGAGTGAGACGTTCCGCTGCCAGC	ATGGACAACAAAGATGACCCATGGGGAGGGAGGAGAACATGGTGACCAGAGATGAGGGTGGGGCATTTTCATTGTGTACTCTTTTGTATTTTGTACAAAGTATTATTTATTTAATAAATAAAATTTTATTTAATTTTAATTAATTTTATTTTATTTTATTTAATAAATAAAATATTAAATACATTAAATAGATAAATACATTAAAAGATGACTTGGTGAGTCATTTTGCAAGGTTCATTTGTAATACAAACAGCCACTCCCTCATTTGCTTTGGAAATGTTGACATTTGTGTTCTGGATTTTCTTAAAGCATGAAATACCAGAGTCTATAAACCACACCCTGAGTGTTCTAAATTTGAGGTCAACTGACAAAACTAGCCATGCAAGTGTGACTTTCCAA…
NUSAP1	30:8358737-8435039	NUSAP1L3	16:28714092-28714106	NA	NA
NUSAP1	30:8358737-8435039	NUSAP1L4	26:33473445-33473459	NA	NA
NUSAP1	30:8358737-8435039	NUSAP1L5	33:19450317-19450330	ATGCACACCGACCAGATAAATGGGCCGGGGGCGATAAAGCCCCCGGACGGTGCTTACAAAGCACTACAAAGCACTCCAACAAATCAATAAGAAAAAGATCAACAACTTGGTAGAAAAAGGGCAAAGAACACAAAGAGGAAGTTCATAGATAAATACTAATGGTGAGTTGACAATCTAAAATAATTCTGACCTAGTCATAACTAAG	ATCAGAAAAAGTAAGTTTATGTGCAAATTAAAACTATTGAATGGGGGGAAGAATGTTGTGAAAAATTTTAAAATCAAAAAACAGGGACAAATATTTGCAACATTTGTGGAAAAGAGTTCTTTTCTTTTACAAAGCACTACAAAGCACTCCAACAAATCAATAAGAAAAAGATCAACAACTTGGTAGAAAAAGGGCAAAGAACACAAAGAGGAAGTTCATAGATAAATACTAATGGTGAGTTGACAATCTAAAATAATTCTGACCTAGTCATAACTAAGAAGTTGCAAATTAAAATGTTAGTGAAGTGCCGTTTTTTTCTATTGGCACAGATTAAAGTTAGATACTGAATAGTAATAGAAGGTGGAGAAAAACAGTCACCCATACCTGCCTGAAGATATA…
OARD1	12:9821947-9828062	OARD1L1	14:39411284-39411299	AGCTTATACTTTAGCATATGCTATCCTCAGCTTTAACCCTTACTGTAAATTCTACTTATTGCTAAATTTTACTATAATTGGCAGAAGTAACTTGGGAAAGTAGACACATCTCAAGGATAAAATTTTATTTTTTATTTTGTTTTATTTTGGTGTCAAGGGGCAAAGGGTGCAAGAGAGAAAAAGAATCTAAGGCAGGCTCCACGTCAGTGCAGAGCCAGATGTGGGACTTGATCTCATGACCCTGAGATCATGACCTGAGCCAAAATCAAGATTCAGACATTGATCTTACGTGCGCGCAATTTAGGGCTGCGGCGGGATTGGCTCCGCGTCGGGGGTCCGTGCGCGGCTTCCCACCTACCAGGGCCGGATCCCGAGCCCTTCCCCGCGGGGCGGGACCTC…	AAAAAAAAAAAAAAAAAAAAAAAAAAAAAAAAAAAAAAAAAAAAAAAAAAAAAAAAAAAAAAAAAGATTCAGACATTAACCAACTGAACCACCCAGGTGCCCCAAAGATAAAATTTTAAATGCTGGGTGCTTAAAGTAGAAGCTTCAGAATGGACACCTTTTATTAATAATTAAACAAGCCACGGGACGCCTGGG
OAS2	26:10431881-10447935	OAS2L1	18:32498692-32498708	GCACTATTAATAATCACAAGACCACTGATGACTATGGTTTTTATTGACCTCAGAATATATCCTACTAAATATGTATAGTCAAAATTTTATGTTTTAGAGTTAGCTGCCACCACAGCCTCTGGCAGGAGCAATGGGAATC	AAAAAAAAAAAAAGGGGTTTTTTAAAAAAAAAAAAAAAAAAAAAAAAAAAAAATTTTATGTTTTAAAGCCAATTGATATTGTTCTTTTGTCTGTGGTGTTATACCACCTACTTGATATATAGACAGGTT
OAT	28:33763661-33788817	OATL1	16:42677454-42677567	NA	NA
OCIAD1	13:44608474-44634665	OCIAD1L1	12:52817429-52817446	NA	NA
OLA1	36:18178239-18340284	OLA1L1	8:45341910-45341926	GAAGCTCTTCGTGTATTATTTCTATATCTCGAATAGGATCTACACTTCCTTCAACATGCGTGATATCATCATCTTCAAAAGCACGTGTTAGATGAAAGATTCCATCACAGGCACTGATATGAGATAAAAAAGCATTTCCCAGGCCTTGACCATTGTGAGCTCCTTTCACAAGACCAGCAATATCCACCACATTTAGAAAGGCAGGAATTTTGCTTGCTGGTTTGTGGTACTGGCAAAGAAAGTCAAACCTTTCATCTGGCACAGGTACTCTGCTCTCATTAGGATCAATTGTGCAGAATGGGAAGTTTTCTGCTGAAGCCTGACTGTTGGTTAATACGTTGAAGAAGGTAGATTTCCCAACATTTGGCAATCCAACAATACCAATTTTCAAGGAGGTTC…	AAAAAAAAAAAAAAAAAAAAAATAAAGTTCTGAACGTATAGGCACAAAGTTGTAGATCTTTTTTTTTTTTTTACAAAGTTGTAGATCTTATTATTTTTTAAATGACTGCATCATTTAGAGTATATTTCCCTTTTATTCCTAAAATTGTTTAATTTGTCTTTTATTACTTTTAT
ORMDL1	37:509592-521036	ORMDL1L1	2:80702029-80702045	AAGGCAAAGCAGGTTTTAAAATAATTGAACCTAACTTCTAAATATATGCTTATTGTCTGGTAGTTAGAAAGTACAGATAAGCATAATAAAGAATGTAAAAATATTCATACAAATCTTTCTATATAATAAATATCAATTGACAAAATCATGTTTAATACCCGAATGGTAGGTGAAGGGTGAGGGTGGAAGTGCCGGGCCGCGCGGGCTGC	AAAAAAAAAAAAAAAAAAAAAAAAAAAAAATACCCGAATGGTATATCTCATGGTAAAGATGATATATTTAGTGAATCCCCTGTTGTTAGATATTTGGGCTATTTCCAATTATTTACTCTTATAAAAGATCCTGCCGCAGTGAACACCCTTTTAGGTAAGTCATTGTGTACATAGACTTATTACTCTTAGGACACATTTTAAGAATTGGGATTGTTGG
ORMDL1	37:509592-521036	ORMDL1L2	29:3277818-3277833	NA	NA
ORMDL1	37:509592-521036	ORMDL1L3	33:7191221-7191239	NA	NA
OST4	17:21064737-21066524	OST4L1	1:81063783-81063797	AAATCTGATACTGGGATCTAACTTTGGGCAGGGGCTAGAATAAACTAGTTAAGACCTGCAGTAGGCTCCCTGATGAGATGATGCTTAATTGGGAGAAAAGGCCACTTGAACTGAGCCCATTTACAATGGGTCCCAACATTTCATAGTAAATACTGGGAGTGGGAGTGGCTTAATTAGAATTTCATTTTGGAAACAAAAATTATGACCATATAGTTACTTGATCTTACATTGAAAAAAAATTTTAGCCGGGACTCTTACCTCGAGCTACTGCGCAGACCGCGTCGCCGGGAGCCCAGCCGGTCAGGATGATCACAGACGTGCAGCTCGCCATCTTCGCCAACATGCTGGGCGTGTCGCTCTTCCTGCTTGTCGTTCTCTATCACTACGTGGCCGTCAACA…	AAAAAATATCATGACCATATAGTTACTTGATCTGACATTGAAAAAAAATTTTAGGTTTCACTATCCACGAAGGTTGAAAATAGGTTGAATCCAACATAAAACAAAGTATTGCTTTTTTTGTTACAGATTTTCCAGGAGAATTTAATACCTATTAGGTACT
OST4	17:21064737-21066524	OST4L2	2:69339433-69339449	AAAAATCCAGGTGTAGTTGCTTTGTATGTTGTGATGGGTAGAGGGATGAAGTGAAGTGGGAAGGCCCCTCATACCCTCCATCTTGCCTCAGACTATGTCCTGGAACCCTGGGGCGGAGAAAGCGCCACTTTCATTCCTGCTTCTTGGGATTGTTGACGGCCACGTAGTGATAGAGAACGACAAGCAGGAAGAGCGACACGCCCAGCATGTTGGCGAAGATGGCGAGCTGCACGTCTGTGATCATCCTGACCGGCTGGGCTCCCGGCGACGCGGTCTGCGCAGTAGCTCGAGGTAAGAGTCCCGGCCGATACCAACAGCTTTGATGCAGAGTGAACCGTGCCACAGAAGGTGACAAAAGGAGCCCAGAGGAGAGAAGAATTAGTGCTTCCTGGAGGAATC…	TCATTTGCTTTCTGTACTGTATGAAGGAGACACAGAGTAAATCAGCTCCAGGCCCTACCTGTGAGCAGCTCCGAGTCCAGTGGGACAGGAGACGCTGATACCAACAGCTTTTTTTTTTTTTTTTTTTTTTTTTTTTTTTTTTTTTTTTTTTTTTTTTTTTTTTTTTTTTTATTTATAT
OTUD6B	29:36466596-36485509	OTUD6BL1	3:9161563-9161579	GGCACTTCCACCCTCACCCTTCACCCGGGGCCCCATTGGCCCTTTGTCAAGTTTCTTTCCTCTCTCATTTGCCCCTTCCTTACACTAACGTGATGGTGGCATAGATGTTAGACCACTTCTCTCCATCTGTCT	CTAGTGAGGGGGAATTGGGGTATTTTTTTCTGGTGTTTCCATTGGCTTCTTCTAAGCCCAGTCTCTTGCCTCTTTTTTGTCAAGTTTCTTTGTTCTCTCATTTGCCCCTTCCTTTCTCTGACGTGTACGGTGGC
OTUD6B	29:36466596-36485509	OTUD6BL2	4:60181303-60181318	GCTAAGCATTATAAAGAGTGTAAAAATATTCATACAACTCTTTCTATATAATAAATATCAATTAACAAAATCATGTTTAATACCCGAATGGTAGGTGAAGGGTGAGGGTGGAAGTGCCGGGCCGCGCGGGCTGCGGCCTCTGC	AAAAAAAAAAAAAAAAAAAAAAAAAAAAAAAAAAAAAAAAAAAAATACCCGAATGGTATATCTCATGGTAAAGATGATATATTTAGTGAATCCCCTGTTGTTAGATATTTGGGCTATTTCCAATTATTTACT
OTUD6B	29:36466596-36485509	OTUD6BL3	25:15123816-15123830	TTAACAGCAACAGAATCTATTTTTCCCCCCTTAGAATTCAGCTTTAGTTGCTCCAGTTCTTCTTTATGTTTCTGTTCCATTTCTGCTTCCAACTTAGCGACATCTTCAGTGAGTTGCTTCCTCCTCTTTTTGTCATTCTTGGGAACAGCATTCTTCATACCCTGAATTTTGGCTTGCAGCTCTTTCCTCTCTCTGCGGTGCCTCCTCGCCAGCTGCTCCTCCTCATCGAGCTCCTCGGCCAACGCCGCCTCCATGACGACCGGGGAGCCGCGCACCCGCGCCGGCAGAGGCCGCAGCCCCTTATTTATTTATTTTTAAGATTTTGTGTATTTGTTTATGAGAGACACAGAGAGAATGAGGCAGAGACATAGGCAGAGGGAAAAGCAGGCTTCCTGCAGG…	AAAAAAAAATAAATAAATAAATAAATAAATCAATAAATAAAAATAAAAGATGCTCAAACAGCGTAGCACCTACTTTGGGAGAGATATCTCCTGAGTACAATGATAGCACTCTCCTCAGAGGATCACTTCAGTAAATTTCCATGGAAATGTCGAGGAGAGGCAGGTGACTTTGGCTGAGTGAATTAGAGGAAGGCCTAGGAAAAGAACCAAGCAGAAATACCGAAGAGGAAACTCTATACCTGAAATCTGTATTCTTTCTTTTAACTGACTTTCACTTGCCTCCCTTTCCTT
OTUD6B	29:36466596-36485509	OTUD6BL4	30:12333819-12333824	NA	NA
OTUD6B	29:36466596-36485509	OTUD6BL5	32:23446564-23446580	TTTATCAGAATAGAAATTATCATAAAAAAGGAAATCCTAGAAATATACAATATCAGAAAAATTTTTTAAAAATTAGATGGGCTTACTTATAGACAAAACAAAGAAGAAAAGAGAATCAGTAAACTTGAAGACAGTCCAAATAAAGTATTCAAAACGAAAAAGAGACTGCCGGCGCGGGTGCGCGGCTCCCCGGTCGTCATGGAGGCGGCGTTGGCCGAGGAGCTCGATGAGGAGGAGCAGCTGGCGAGGAGGCACCGCAGAGAGAGGAAAGAGCTGCAAGCCAAAATTCAGGGTATGAAGAATGCTGTTCCCAAGAATGACAAAAAGAGGAGGAAGCAACTCACTGAAGATGTCGCTAAGTTGGAAGCAGAAATGGAACAGAAACATAAAGAAGAACTG…	AAAAAAAAAAAAAAAAAAAAAAAAACAAAACGAAAAAGAGATGAAAAATCTAGACTCAAAATAAAGCCATAAAAAAGAACAGGCTCAGTTCATCTACATATCAATTTGATTCAATTCTGATCCAAGCTGTATAGGATAATATTAAATAATCTAACATATGTGTAATTGTATTCCCTTAGTAAAGGTGACAGAATGAGGCAGAAAAATATTTGAAGAAATATTGGCCAAGAATGATCCAAAATTGATGATTGACATCAATCCACAGATTCAGTAAGCCCTGTAACTCCCAAGCAGACTA
OXCT1	4:67709846-67841737	OXCT1L1	26:25917044-25917060	NA	NA
OXR1	13:7220959-7580881	OXR1L1	X:72473364-72473386	NA	NA
PA2G4	10:426074-437044	PA2G4L1	10:53156147-53156163	NA	NA
PABPN1	8:3580768-3585546	PABPN1L1	30:34474035-34474053	NA	NA
PACC1	7:10568030-10606672	PACC1L1	27:21729980-21729998	TTAATGGAATCATCATCCATTCATCATTCTTAAGATCACCATTTTAGTAAAGCAAACACAGACTGGCATGACTTGTGTGGTTACTACCACTTGGTTTGGTTTGGACATTTATTAAGAAAGTTGTTTTGGGGAGCGCGCTTTCCGAGGCGTGCGGTGGGGGGGGGTCCCCGCGTGCGGAGGGGTGGCGGAGCGGGAAGGAGGCGGGACGCCGAGCCTCCCCCGGATGCCGCGGGCGCGGGATGGAGCCGGGGCCCCGGAGCCGCGACCCGTAACCGGCAGCTGAGTGAGGAGTTGGATCAGGTGGTTGAGAACTCAGAGCGAGCAGACGAGCAGGAAAAGGAGACGGACAGAGTCCAAGGTCCAGGAGTCTTACCAGGCCTGGACAGCGAGTCCGCCTCC…	GCAATGTTCTCCATGAGATGGCCCACCCAATGAACCCCAAATTTTTTTTTAAAAGATAAAAAAAACTTAGGTTCAATAAAAAAAAAAAAAAAAAAAAAAAAAAGAAAGTTGTTTTGGGAAAGAAAGTGCAAGAGATATTTCTTTTTTTTTTTTTTAATTATTTTTCCCTCCTGCGGTACTTTTTTTATTTTTTTTTTAATTTATCAATTAATTAACCTATGTTTCAGAAGTA
PACS2	8:72672861-72721655	PACS2L1	29:6238958-6238969	NA	NA
PAPSS1	32:28136741-28235529	PAPSS1L1	3:20124344-20124357	ATACCATGACAAACCAAGTACTCCTCTAAAGCCATGCTCACTGTGGTCTTTCCTGCTCCAGATAAGCCTGTTAGCCAAACTGTACAACCACGAAAACCACCTCTGGTTCCAACGACCTGACCTCTCTTGTTCCTGCTGACATGATGAGCTTGATAGGTGACATTAGTTGCTCTCTGCATCCCCCAGTTCTGCGCATTATTATTGCTCAGCTTGACTTTCTTGCACAGGCTCCCGGGGACCTCCATAACCGCAGAGCGCGCTCGGGGGCCGGGAGCCTCCGCGCCCACAGGTTAGAAAGGCCGGCGGGGGCGGGGGCGGGGCCGGGCTGGGGCCAAGCTGAGGTTTAATATATGGAAAGAAATGTGGAAATCATTTTCTTATATATTGCATGACATTACA…	AAAAAAAAAAAAAAAAAAAAAAAAACCTCAGCTTGTACTTTCCATCTTACTGATTTCCAAAATAATAGTGTTGACTAGTATAGGATAAGAGGATAGTCATATTCTTTTTCACACACACACACAAAAAGACACTGGGAAAACATTCAAGTTGAAATGTTCAAAGAAAACAAAAATCAATTGCCACATGTTTTTCTTATTGTGATTCCCTGGGTAAGCCTCATTCTCCTGAGGGCTGCCAGAGAATACAACTAATAAAGCTAAGTGACTTGCAGAATGTTGAAA
PAPSS1	32:28136741-28235529	PAPSS1L2	6:32813526-32813542	AGGTGGTAAACAGAGTACCCAGTGCAAGTGCACCTGGGGACACACGCGGCCCGCCACATGGTTGTGACTGGGGAGCATTGGAAAAAGCATGTCATTCGGCCCCGCCCCCGCCCCCGCCGGCCTCTCTAACC	TTTTATTCAATAACATTAAACTTTTTGGCTTCTTAAAAAAAAAAAAAAAAAAAAGCATGTCATTCCACTCAACTCTTTTAGGGGTTGAATACTGGGTCACTTTTTTTTTTTTTTTTTTTGGGAAGCCTGGATGATCCAATCTCAGTCAGTGTTGAAGTGAATGAAT
PAPSS1	32:28136741-28235529	PAPSS1L3	7:57295531-57295547	CATTGTGGCAAAGGGGGACACGGCCAGGAATCTGAGCTTCCAATACAATATTTTTAAAACCAGACCACAGCGCTCATATGTGAAATGGCACCTTGTAAAACCATTCACAAAAGCAAAATCCGGCTCTCCGCCAGCTAACCTGTGGGCGCGGAGGCTCCCGGCCCCCG	AAATTTTTTTTTTTTTTAAAAATAAAATTTTTTGTTTTTTTAAAAAAAAAAAAAAAAAAAAAAAAAACAAAAGCAAAATCCGAGTTATGTCCAGGATTATTTGGAGACTGTAGCTCAGATATCAACTGCCGTCCCAAGACTACAGAG
PAPSS1	32:28136741-28235529	PAPSS1L4	12:11215735-11215749	CTACAAAATATTCATAATAGCAGTATTTACCTTATAAGGCTGTTCTGAGAATTAAATGAAGTAAACAAAATATAGTACTTAGCATAATACTTAGCTATTAATGATCAAAAATCTGCATTCGAGATGAAAACAGCATTAAATGAAAATTTCACCCAGCCCGGCCCCGCCCCCGCCCCCGCCGGCCTCTCTAACCTGTGGGCGCGGAGGCTCCCGGCCCCCGAGCGCGCTCTGCGGTTATGGAGGTCCCCGGGAGCCTGTGCAAGAAAGTCAAGCTGAGCAATAATAATGCGC	TTATCTTCCTACCTTTATTCTGGTTTTGCCCACTTTGTACATCTATTTTTAATACTCATTATATTGGATATATTCTTAAGTTGCTATAAATCCATTTTGGAATGAAATTTAATTTAGTAACAAATGTACTGAATGAACAACCTCAGTGAAGACTTTTTTTTAATCTGAAATTTTCATTTTTTTTTTTTTTTTTTTTTTTTAAAAA
PAPSS1	32:28136741-28235529	PAPSS1L5	19:33714542-33714561	CCTCCATAACCGCAGAGCGCGCTCGGGGGCCGCGATAATAGAATATTTTTTAAAGCTACTAAATGAAGAAAATGCCATGGTACAAGTAGGTAGTTTTTAAGGCTATTGAATTGGTACCTATTAACCCCTGTAGAGTACCTTGCATATATATTTATTGCTCAATAA	ATATTGTATAAATACAATAGATGGTCTCTTACCTTTTTTTTTTGGAACTATGCATCTTATTGATAATAGAATATTTTTTATTTTTTTTTTT
PAPSS1	32:28136741-28235529	PAPSS1L6	32:4049883-4049896	NA	NA
PARD3	2:2252262-2791459	PARD3L1	32:35271571-35271588	NA	NA
PAWR	15:22114014-22159287	PAWRL1	1:11855682-11855701	GTGAAAAAGGTATGTACAGAGTGGGAGAAAGTATTTGCAAACTATGTATCTCACAATGGGTTAATATCTAAAATATATAAGGAACTCATACAACTCAATAGCAAAAACAAACTAAAAACAAATAACTTGATTAAAAAATGAGCAAAGGGCTTGACTAGATATTCTCCAAAGAAGACATACAAATAGGCCCCGAGCCCCGGCCGCTAGTTGGCGGCAGCCGCTTCCGCGCCGCCGCGGGGGCTCACCTGGGCGCCCCCCCACCTCCTCCCAGTGCTTAGATGAATATGAAGATGACGAAGCAGGGCAGAAAGAGCGGAAACGCGAAGATGCAATTACACAACAGAACACGATGCAGAATGAAGCTGTCAGTTTATTAGATCCAGGCAGTTCCTACTTGCT…	NA
PBDC1	X:59068733-59073085	PBDC1L1	7:19653440-19653460	TTAGCTTTGTATAGGATAGGATGTAGAGTTTATAGTGAGGGAGTTTTCATCAAAATTTAAAATTATAGGGGGAAACTGGTGCTGGCTTTGTGGGGCTCAACATGGAGATGCCTAGGGGA	CTCATGAATAAATAAATAGAATATTTAAAAAAAAAAAAAAACAAAATTTAAAATTATAGGGATGCCTGGGTGGCTCAGCGGTTGAACGTCTGCCTTTGGCTCAGGGTGTGATCCCGGGG
PBDC1	X:59068733-59073085	PBDC1L2	7:35876305-35876318	GCTCAGCAGTTCCCCTAGTCGTCTCCATGTTGAGCCCCACAAAGCCTGTCCTTGGTATTAACTGCTCCAGTTATAACCTGTGTAGAGAAAAATATATGCCAGCTCTGTCTTTTGGCAATTATTTGGTATGGCTGTTCT	AAAGGTGCATTGTCCTTGGTATTAACTGCTCCAGTTATAACCTGTGTAGAGAAAAATATATGCCAGCCCTGTCTTTTGGCAATTATTTGGTATGGCTGGTCTAATTCAACTGGTTGGTTGGAGGAAAAAACAAAAAAAAGAGAAAAGACATAACAAAAAAATGGCAAAAGAAAG
PBDC1	X:59068733-59073085	PBDC1L3	7:79699507-79699517	NA	NA
PBDC1	X:59068733-59073085	PBDC1L4	34:12342762-12342781	AAGACACTACGCATTCCCTTACTGTCGATATAAAAGAACTAACATCTAGTCAGGCTGACATTAAAAATGCTATAACTGGAAACTGGTGCTGGCTTTGTGG	AATAGAATATTTTAAAAAATAAAAAAAAAAAAAATAAAATAAAAATGCTATAACTGAGATGCAGTCCCAAACGGAAACCCTAAACACAAGAAAGGTAATGGACCACAGAGGCAGACTTAGGGAACACAGCCACTGATTGAAACAATAACGTTCATATCACAGGAGACTCAGAAGATGAAGAGAGAGAAAAGGGG
PBK	25:29751805-29781806	PBKL1	8:44236744-44236759	NA	NA
PBX2	12:1577639-1582609	PBX2L1	34:2511558-2511567	NA	NA
PCID2	22:60602440-60623811	PCID2L1	24:7615302-7615315	TGGTTGATGGTGATGTGCGCCATGGCCGGACCCCCCGCGGAAAGTCAAGACATGTTCTTCACCTTCTGGGAATTTATAATTAATAGGTACTGCAGGTATAGAAACAGCTAGTCATAAGTCAAGCTATGGAGAAGCCCATACACAAATGATAAAAATCTGTATGCTTGTGGGCAAGAGAAAGTGACCAAGATGACCAGCAAGGGGAAGATGTGCTTCAGGTGAACCTTAAAGA	ATTTTTGTTAATTTCACTTGTATTTGTTGAGCATCATTTTTTACCAAATATTGACGAAGATGCTAGGAGTGGCACAAACCGTAAAAAGACATGTTCTTTTTTTTTTTTTTTTTTTTTTTTTTTTTTTTTTTTTTTTGTGT
PCMT1	1:40494441-40539453	PCMT1L1	26:5870611-5870626	ACTTCCCATCTTGCAACCTGATCCTGCCCCAGGTTTTCCAATCGTGTGAGCCAGAAACCTAGAAGCCAGCTTTGATTCCTCTGTGTCTTCCCATCCACCCATATCTTGCCCCTTGGAGGCCTGGTTGACTCCCATGCATCATCCCACAGCTGGACTATAGCTGTAGCTTCCATAATCCGTTCTCCACCACAGGGGGTCAGAGCTATTTAAAAAATAGGCATCAGAGTGGCGGCACCGGCGGCGACAGCAGTCACAGCGG	AAAAAAAAAAAAAAAAAAAAATAGGCATCACTTCTCGCCAGATCTCTTGTACAAAAACTCCTGATGACTTCACAATGCATTAGAACATAATCTGAACTCCTTACCATGGTCATAATCCAGCACCTGCATGCCTTCCTTTTTTTATTTTTT
PCNP	33:7960097-7978062	PCNPL1	1:18064818-18064837	AAATACATGGCATGGTGCATATTGCCGGGCATATAGTAAGGGCTCAACAAATGGTGCCAGTTGTCATTCTTACATAGAAAGATCGTCAGGGCTTGGCGTGGCTGCAGGGGAGGCCGCGGCGGGGAAAATGGCGG	AAAAAAAAAAAAAAAAAAAAAAAAAAAAAAGAAAGATCGTCAGGGCCAGCTTGATGGGTGTGTGGCCTGTGACACAAGCCTACTCTCAAAAAAGCTCTGTCCTTGGTTTAACACTCTGCTGTCTCCATCTTGAAATTCTTAGTACATTTTCTTCAACACAGCACCTCACATTTTCATGTTGCGCTGGG
PCNP	33:7960097-7978062	PCNPL2	7:48098793-48098807	CGCTGCGTTTTCTCGGGCTCCTCCTCTCCCGCCTTCCCGTCCGCCATTTTCCCCGCCGCCGTTATTATCTTTTTGATCTTCACATTGTCACAACTTTGGTTGGTGGAACCCCTTCATGCTGTCACCTTTATTCTCTTGTGATCATACTAATTTTTGAAAATGTCCCAATTTTCTGGCATAAAATATCCTATGTTTGGTCACCTTTAACCATCTCTGCCTCACACATAAGAATTAGCCATTTTCCTAGGAATTTAGGATTCTT	AAAAAAAAAAAAAAAAACAAAAAGATAATAACGACTATATTGATTGAAACACAATGAGTCCATGAAAAGTCATTGGTACATAATGATCCACAAGGTGAGAAAATCAATATGAAGCATATGAAATCACCTATGAGGTCTCTTTGGGGAAAAAAATTAACTTCAATTTAATTGAATATTTAGAATTAACTTCCAAATTATAGGAGTTAC
PCNP	33:7960097-7978062	PCNPL3	19:16173155-16173172	NA	NA
PCTP	9:30725209-30749891	PCTPL1	32:38018397-38018411	GGCCTCCAGCAGCAGCTCCCAGCTGGCCCCGGGCAGCGCCGGCCGCCGGAGCTCCGCGCAGGCCTCCCGGAACTGGTCCTCGGAGAAGCCGCCGCCCGCAGGCTCCATCCTCGCACAGCCCGGCCGCGCCAGCCCCCTTATTTTTCTTTTAAAAATGAAATATAGGCTAAAAATAAAATGAAAAAAAAAGTTCTATTGATTAATTTCAAGAAATTGGAATCGTCTTAAGAGTTGAAACCTTACACCTCATTCAGGCCTTGCTCTCTAGAAGAGCCCCATTCTAGAGAAAGGGGTTCACTTGTTTTCAGGGCACCTTGGCCAATCCTTGGGCTTTAATGGTTGAGAACTTCCTCTTTACATCGAACC	AAAAAAAAAAAAAAAAAAAAAAAAAAAAAAAAAAAAAAAAAAAAAAAAAAAAAAAAAAAAAAAAAAAAGAAAAATAAGAAAAAGACTCTAGTGTTCTACTGAAAATGGTAATGTTATATGACAGGATATTAAAGTGAAAGTTCCCCTGAGGCCCTCAGATAGCAGAGATATTAAATGCGAAAGTCTGATTTCAGAGGGAAACTACAGCC
PDCD5	1:119379427-119384664	PDCD5L1	2:22929345-22929363	ACAGTTAAATTCAACAGAAGAAAAGTCATGGACTCTGATGAAGAGGACGATTATTGAAATTTAAGATGTTTAGAGACTGGAACTTAATGGAACAGTTCTAAGATAATACTGGGTAGAAGTGAAGATCTGATTGTTTACTTTGTTTATTGTCTAAATGCCTTTTAAAAAAAATAAACTTGTTATGCAAAATAAAAAAAAAAAAAAACAAAAAACATTGGGACCTGGTGCTTTTTAATCACCTTTTCTTTCTCTCTGCTGTAATTGCTTATTTCAGTTTTAAACTTTTAATTGAACAACTTTGGTAAGTTTTTGTTAGGAAATCATATCTTTTGGATCTAAATTTTAATTTATTGCCATTGCGTTGCAGGTAGTATCTTTCACATTTCCTTTAATGCTT	CCTCCGCCATGGCGCGGCCGTCCGGGGCGAGCAGCCGCCACCTCGCTCCGCGGGCCCCGCAGCCTCGGCGCCCAGGTCCCAATGTTTTGATAAGAACAGATAATTCAAACTTTCTGGCTCAGAGATCCTTTCCATTCTTAAAAATTCTTAAAATTTTTCACAAAGGCTTTGTTTATATGGGTTAGAACTATCAATACTTACCATCCTAGAAGTTAAAACAGGAAAAAATGTCAAATTATTAATTCATTTTAAAAT
PDCL3	10:42214127-42223986	PDCL3L1	37:25320533-25320533	NA	NA
PDE3B	21:37364940-37532152	PDE3BL1	6:45661939-45661939	NA	NA
PDE8A	3:54278498-54367492	PDE8AL1	3:78638210-78638210	NA	NA
PDF	5:80323573-80325665	PDFL1	32:21554279-21554291	CCCATCGCAGACGCCCGGCCGCCGCCGCGGCCCTCCCCGGCCCCCGTAGGCCGGCGCTCCCGCCGCGGGGGACGCCGGGACGCCTATTTCCTTTTAAATTTAAGACAAAATTGGTTCTCAACAGCCTTTTAAAATAATCTATCCTGAAAAATTAAATTCTGTAATTTAAATAATTTACCATCATTACTGAAATTAAAATACATTAAGGAGATTCTTTACTCT	AAAAAAAAAAAAAAAAAAAAAAAAAAAAAATAAAAGGAAATAGCTCTTAGCTATCATTTTCTTCTATATGTACTTTTATTAAAAAATATTTGTTCTTAAAGTGAATAAAGTTAACTTCATTATATGTGCATCTGTCTACTAGCATATAATATGCAAGCTAATATAACTTTCTGTAAATAAGCATGTATGAAAAAATATATA
PDHB	20:32185420-32191592	PDHBL1	8:62058832-62058846	GCTTGTGATTATGGATGACTTTGTTCTTTGCTTCTTGTGTTTTTCAGTTTCCTTTTAGGCACATGTTAACTTTTAAAAAATAAATTAGGACACGGTCAAGATGGCGGCGGTGTCTGGCCTGATG	AAAAAAAAAAAAAAAAAAAAAAAAAAATAAAAAATAAATTAAAAAGAAAAAAACAAAAGAAAAGAAGAAAAGAAAAGAAACAAAAGAAAGAAGAAAGGAAGAAAGAAGAAAGAAAGGAAGAAAGGAAGAAGAAAAAGAAAGA
PDLIM1	28:8770882-8817828	PDLIM1L1	12:44747915-44747933	ACCGACGCGGCAGGACGCGCTCGCTGGGCTCCCCGGCAGCGGTCGGACCCTCTTTGCTCATGTTCTTTGAAAACACCTCTCTGCTGCACTTCAGATAAGAGTGTTGAACCCATAAATTCATTAGCAAGGCACAGAGCAGCTTCCCTGGTCTGTGTCCTTCCACAGAGCTCAGATTTCATTCTGTGCCAGGAGTCATAC	CTGGTCTTCAGCAAACACACTGCTCCCTTTCTCTTAGAGCAGTGTAAATTGTTTTACAGTGCAAAGAGAGGTGATGAGAGTCAAAAAGTCAAAGAAAGTGAAGCTTCCCCTATTCTTTCTTTGCTCATGTTCTTTTTTTTTTTTTTTTTTTTTTTTTTGGAGTCTATAAATTTTTTGAGTAAAAACGAAACAAAGTCAAAACTATTTAGTTTGGGTTGT
PDXP	10:26945751-26952234	PDXPL1	6:22778814-22778831	NA	NA
PDZD11	X:54735579-54739084	PDZD11L1	4:52279185-52279201	TGCGCCTCCCTCAGGCAGGTAACTTTGCTGAGGCTCAGCCACACAGGAGAGGAAGACTGACCTCACAGAAGTTGTTGTGAGGCCTAAAGGAGATGATGGAGATCAAGCACCTGGAGGGTGCTTTATTAATAATATGTACATCCGGACTGAATTGGCGGCGAGCGGAACTTGGGGTTCCTGAGGTTTGCGGATGAGTGAGGGCCTTGCTGGAGATGGACAGTCGGATTCCTTATGAT	AACGACTCTCCGGAACCATCCTCCCCCCCCCCACCCCCCCCCCACAAAAGAAAAAGGCAAGGCGGAGGAAAAAAAAAAAAAAAAAAAAAAAAAAATAATATGTACATCCTTGGTAGAAGCTCTTCTCTAGGACAGGAAGCATTTTACCATAATAGTACTGCTTAAAGAAAACTCAGTTTTCTTTAAATAGGGTCTAAACAGGGCCATGGAGAATGAATGCAATTCTTGCACGTAATCT
PEBP1	26:14522124-14526370	PEBP1L1	1:111301426-111301444	NA	NA
PES1	26:23655994-23672707	PES1L1	1:70480659-70480673	GAAGGTTTTGAAAGAGAAAACAGCGTGTTGTAAAAGCATCTCTTAAGTCAGTATAACCTTGTTTGTTCTGGGGGTTAGTGAACAGATGAGGGAAGAACTTCCTGAAGGGATGTTCGACCGGTAAAAAGAAGAAAGAGAGGGTGGCTAAATGAAGAGGAAAGCAGGCTGTCAGTCCGCGCGGCGCTGGTAGACCCTTCAACGTGG	AAAAAAAAAAAAAAAAAAAAAAAAGAAGAGGAAAGCAGCATTCTGGGCAGAGGGGGCAGGGAGGTGTGGGAGCCACAGTGTGAGTGGTGCTAACAAATCAGAAGCCCAGGTAGCTGGAGA
PES1	26:23655994-23672707	PES1L2	3:33251281-33251298	AGAGCCTCGTTCATACTTCTTCTTCTCCAGGCCTCCCATAGCTCCACGTTGAAGGGTCTACCAGCGCCGCGCGGACTGACAGCGCCACTTCCTCTCCTATTTCTTATGTTATGTGTGTTGTATGCTGTATTCTTAAAGTCAGCTGGGAAAAAGAAAACATTATGAAGAAAATCAGAACAAAGGGAAAATACACTT	TAAAAAAAAATTTTTTTCCCCAAAAAAAAAAAAAAAAAAAAAAAAAAAAAGAAATATACATCAATCACTACTTACGTTACTGGTAAGGCTCCCAGTCAATGGGAGGCTCTTAGTAGTTATGTTTCGGGGAAGTCAGTTTCAGGTCAGTGCTGCTGGGCCACATCTCCCAGATATGTCCAAGGCCACAGAGTCTGGGCTTCTAGTGTAGCCTT
PES1	26:23655994-23672707	PES1L3	7:21430397-21430415	CAGGTAAACTACTTCTCCACTTGGATGATAAAGGAAGCAATTAAATTTCCGGAATATTGCTGTGAAATTTTGCTGGCAAGGAGATGTTCCTCAAATGTCTGTAGAAATGTCTGTAAGTAACATTTTAGAAAATAACTTCCACCTTTAAATAATGGAGCAATCCGGGCGCTGGTAGACCCTTCAACGTGGAGCTATGGGAGGCCTGGCG	GGAAGCGTTTGTTATTAAACTGCTGGAGTTTTGGAACCAAAAAAAAAAAAAATAAATAAATAATGGAGCAATCCAATATTTAAAATTATTCCGAAGTAAAATTAATAGGTAAAAAATACATTGGAAAGTGAATAAGTCCCCAGTAATGTGTTTTCCAAATTCTATTTTAATTACTAGATACCATTTGAAAGCAGGGCACACCTATCATAGAAATTCCTA
PES1	26:23655994-23672707	PES1L4	20:5559849-5559857	TCCATTTAATGGCAGATTTTGAGACACAGAGAGAGTAGGAGACAAACATGACAGAGCTCATGATGAAAGCTAGTGGAGACAAACCTTTTCCTGTTGAAGTGAAACCCTCAACACTCTGGGCTTTGCTGGCACAACACAATTTGGTCCTATTATCATCTCAGAATTATTGACAGTGCACTTTCCTTCTTAAAAGTGTTTTGATTGGAGCTATGGGAGGCCTGGAGAAGAAGAAGTATGAAC	GTGGGGGGTGGGGGGGGAAAAATTTTTTATTAAACGGTTGGAGTTTTGAAAAAAAAAAAAAAAAAAAAAAAGTGTTTTGATTGAAACAAGAATTCACATGATGTACAAGTCCTGGGTATGAACACTACTGAACAGCAAAAGTCCATTCA
PES1	26:23655994-23672707	PES1L5	23:3826532-3826549	CCCAGGCTGACAAAGCAGCCATCAGCCAGAGCATTCCTCTCAAAGTTGCCAAAGTGCAGTGACAGCCCCCCCACAAACAACAACAACAAAAACCAGACTTTAATTCTGAAAGCATCTTTAAGAACAGAAAGTCACCATAAAAATGATTAAATTGAGAGGAAGTGGCGCTGTCAGTCCGCGCGGCGCTGG	GGGGGGAGGCTTTTTTTTTAAACCTGTGGGGGTTTGGAAAAAAAAAAAAAAAATGATTAAATTACTCTTCATCAAGGAGATATGCCAATCTTAAACATGTATGCATAAAATAAAATATAGAAAGAGAAGTGAACAGTCTTTTATCATAGAGCCCTGAAAAGCTGATGGGATGGTAAGAAAGAGATAAATAAATCAT
PES1	26:23655994-23672707	PES1L6	29:33821513-33821531	TCTTTAGACTTTAAAATTTCCTGAAATTATCACAAAAAGCTTGAAAGGAGCTAACTTCTAATCCCTTTTGACACATATAGAAGTTTCTTGCCTGGCGCGGCGCTGGTAGACCCTTCAACGTGGAGCTATGGGAGGCCTGGAGAAGAAGAAGTAT	GGGGGGGGGGGAAGCTTTTTTTTTTAAACTGCTGGAGTTTTGGAAAAAAAAAAAAAAAAAAAAAAAGAAGTTTCTTGCCTGTACTTAAAAGTCATGTCAAAGCTGATTTTCTTCACATGATTTGGACAAACAAATGGGTTAGATTTTTACCACA
PES1	26:23655994-23672707	PES1L7	35:22886984-22886999	GGCCTCCCATAGCTCCACGTTGAAGGGTCTACCAGCGCCGCGCGGACTCGGAAAGGAGAAACTTGAGGAACATGAAATACATCAAAATTCTACTGGTGGTCATCCTAAGGTGATGGAAGTGGGCTGGTTCTCTCTCACGCCCTGTGCCCTGCCTTCTTTCTATCTCTCATATTTCCTGATATAGCAGAGTGCTGTCACACTTGGAAAAACTAAAAGGACCCA	CCCCCTGGGTGGGGCGTGTGATTGGGCGGGGGGGGGGGGGTGGGGGGGGGGAGGGATTGTTTGTTGAACTGGTGGGGTTTTGGAAAAAAAAAAAAAAAAAAAAAAAAAAAAAAGTTTCTCCTTTCCATTTAAAACATAAAGATTTTGAACATAATGCATGCTAAATTTTGTATCCTGCTTATTCTTACCAGATTCTTTTTATAGGGCTATGTCGAGGGGTTTGTACATGAGATTTTTTTCTTAAA
PEX19	38:21939054-21945281	PEX19L1	7:48699738-48699753	GGGCAGAGTCACTGGCTCTAGCTTTATTCTTTTATCTTTCTCTCCTAAAAAGTCTAGAAACCTGCCATGTGTTAAAAATGATCAAACAGAGAGCAAGATGCGCCGCCGCCGAGGAGGGCTGTGCTGCCGGTGCCGAG	AAAAGGTTTGGAACCTGGCATTGGGTTAAAATGAACAAACAAAATTTAGGAAATGACCCCCTTTTGAAGAGGTCTTTTTTCCATTCTATTGCTCCTGTT
PFDN5	27:1906133-1909613	PFDN5L1	6:41162656-41162674	NA	NA
PFDN5	27:1906133-1909613	PFDN5L2	13:59221002-59221026	NA	NA
PFDN5	27:1906133-1909613	PFDN5L3	16:15868880-15868891	NA	NA
PFDN5	27:1906133-1909613	PFDN5L4	21:6617241-6617255	AGGATACTTTCGACACCAGCTATATCTAGGCAAGGGAGAACAAAGATGTATACATTTTTGTACAATGTGTTAGACTCTGAATTAAGTACTTTATGCGCCACCCCGCCGGTGCCTCCTTCCCGACATGGCGCAGTCGGTTAACATCACGGAGCCCTGAACCTGCCG	CGGGGAGAGAGAACGGGGAGGGTTGTTGATGGATAAAAAAAACGCCCCCGAGGAACAAAAAAAAAAAAAAAAAAAAAAAAAAAAAAAGTACTTTATGCATAATATTTCATTTAATTCTCACTATAACACAATGAGGTAATATTGAGTAGTTAATTTTTAAAAATTAAATCTCAAATGACTTAAGAAAATTTTCAGG
PFDN5	27:1906133-1909613	PFDN5L5	24:25624049-25624064	TTTAATGATCAGAAACATGTACCATTTACAAGGTTAAATTTTTCTTAAGAAACACCTTCGCTATTTGTATAAAAACTGAGATTTTTAACAACTTAACCTCTAGAGTTACTGAACTATTTTCACCTTGAGAATGTAAGTAGAACTGCGAGTTTAAATGGTTGGTTAGCTTCCCGACATGGCGCAGTCGGTTAACATCACGAACCGAAACCGCCCCCACC	AAAAAAAAAAAAAAAAAAAAAAAAAAAAAATAAATGGTTGGTTACTTCATTTGGGTGAGGGAAACAGCTGCAATAAAGCTTCATGAATGTATCTCCATCTTGAAACCAAAAGTCTTTTCCTTATTGATGTCCTCTCACACTTGTGTGCCTAATCAGGACCCTTTTGTGCAAAGGAAATGTTTCTAGGAATCTACCAGATGTTTCTGACTATGTCCACGCT
PFDN5	27:1906133-1909613	PFDN5L6	32:28375293-28375311	GGCACGGGGCGGAGAAGACGGCTGTCTCGTCGCGTCTGGGGAGGGGCCGGGACGGGAGGGGCCGGCTCGCCGCGCGCCTACCCCGTACCCTCGTTGTTCTTGTTGAGCACGTGCAGACAGTCCTTGGCTTCCACGTACTTGGTCTGCACCACCTTGAGCTGCGCGATGGACGTGGACAGGAACTCCACTTCCTGGTCCAGCTGGTTCTTGAGCATCTCTAGCTGCGGCAGGTTCAGCTCCGTGATGTTAACCGACTGCGCCATGTCGGGAAGGAGTTATTTTGTATTTCTTTTAGGTATACCATAACATGAGACATTTAGTTCCAATATACCTAAGCTGTCCCTCCAGGAGATAATTAGAGAAAGAGGGAAGAGTTTTGGAAGAGAAAAGAGGAAGCAG…	AGCTCACAGCCCTGGGGGCAACTCAGGCGACGGCCAAGGCCTGAAAGCTCGGTTCAGAAACGGTTCAGAAACGGGCCAAGTGCTCCTGCGGCGGGAGCTGGGACCTTGTGGGCGTGGCTTCCCGGGGCCCAGGACGGGAGGGGCTTGCTTCGTGCTAATAAACGTGCCCGCGGGGAAAAAAAAAAAAAAAAAAAAAGAAATACAAAATAAGAGCTGTGTATCCTGTTCTAGATTTTTGCTGAAGGGAAACAGGCCAGTGGCTAAGGATCATTATGTAACCAATGGTGTATATACATCCACTCTTGTGATCCTT
PFDN5	27:1906133-1909613	PFDN5L7	32:32534408-32534421	CGGCAGGTTCAGCTCCGTGATGTTAACCGACTGCGCCATGTCGGGAAGGAGCTCTGGATAGTTTTAAACAAAGAGAAGAAAATATCATCTACTCCTTAATGACTGAGTAGAAAATATATTCAGGAGAGAAAGACCCCTCAGTCCTTCTAACAAAGGGCTTTCCTTGCTGAGAGCTCAAAGGCCCTT	TAAACTCTTCTATTATTATTTTCCAACCATTATGTTTATAAATATTCTACATTATCTGTCTATGCAACAATATCTTTCTTTTTTTTTTTTTTTTTGGAAATTATTTTTAAAATTAATCCCTTTGTTTCTGGAT
PFDN6	12:2729562-2730858	PFDN6L1	10:35050963-35050977	ATGGTAGACTCTGACATGAAAAAAAAGAAAAGAAAATCATAAGGAAGAGAATATACATTTACAATACTGTATTGCATTTATCGAAAAAAAACTTCGAGTAATAGTGAAGCGAGAACGCCGGG	AAAAAAAAAAAAAAAAAAAAAAAAAAAAAAGAAAAAAAACTTCATATAAGTGGAACACAGTTCAAACCCATGTTATTCAAGTGTCAACTGTATATATTATTCATCATGCCAAAAGCTGGCAAACTATAGCCCATGGGCCAAATCTGAACACGGCCTACTATTATATATAAAGTCTTATTAAGAACATAGTCATGCTCATTCAGTTTCTTATTGCCTACAGTTACTTTTG
PFN1	5:31670483-31671891	PFN1L1	2:23515805-23515822	GTGCTGGGGGTCTCTGGCTGGCGGGCGGGGGGCGTCGGAGAGCTCGGCTCGCGCGCTGCGGTCCGGACCGCGGCTCTGCTCGCGGTGTCCTGTTTCTACGATTTTAGTATCAAATGGATTAGTTTTGTTGTCCTAAGATTCTCCTATGCTCTGTCAATTCATTCATCTCTCCTCTTTAGTCTTACTGGATTTTTAACAAGAAATTATTTTGCTTATCAGGGCATATTT	AACTTTTGCCCCCAAATATGCATAGTCTCCTCCATTATCAAATCCCTCTCAGAATTGCATATATATTGCAGATGAACCTATATTGACTCATCATCATCAGACCTGAAGTCCATAGTTTACATTAGGGTTCAGTTTTGGGGTTGTACATTCCATGCATTTGGACAAATGTATGATGACCTGTATCTACCATTTTTTTTTTTTAGTAGAATCTTTTTTATTCAGAAAAAAACAAAAACAAAAACAA
PFN1	5:31670483-31671891	PFN1L2	21:12659379-12659379	TGATGTTAACCGACTGCGCCATGTCGGGAAGGAGGACCGGCGGGGCGCATAAAGTACTTAATTCAGAGTCTAACACATTGTACAAAAATGTATACATCTTTGTTCTCCCTTGCCTAGATATAGCTGGTGTCGAAAGTATCCTTGCCCTTACTTCCTGGAAGAAAACTCTGGGACTACAGGAGCCAGCTGACTTCCATGCCCCACAGGTAGGCCCACACCCCCTTGTCACTACTGCACGT	AAAAAAAAAAAAGTACTTTATGCATAATATTTCATTTAATTCTCACTATAACACAATGAGGTAATATTGAGTAGTTAATTTTTAAAAATTAAATCTCAAATGACTTAAGAAAATTTTCAGGCTGTACAGCTAGAAAATGGTGAAGTTGGAACTCAAGCCTAGGTA
PGM1	5:46444433-46577621	PGM1L1	4:88225750-88225764	TTTGTAGAAAATTAGAAAATGTCATTGAGCAAATAGGAAAAAAAAATCATCTACAATCTCACCCCTCTATCCAGAGGGGATCATGGTTAATGGCCTGGGTTTAACTGTCCAGTTCTCTCGTGGGCATGTGGGGTACGCACGTGTTTTAACATAAAAATGGGGTCACACTGTGTATATACATGCTTTCGTCAACCATGAACAGCTTTCCATGATTTCCAAGGACATCTTTCACGTTTTAATGGTTGCGATGGGCAGCCGCAGCCGCAGCTCGGGCCGCAGGAAGCGAGTCGCCACCATGGTGAAGATTGTGACCGTTAAGACCCGGGCGTACCCGGACCAGAAGCCGGGCACGAGCGGGCTGCGCAAGCGGGTGAAGGTGTTTCAGAGCAGCGCCAACTA…	ATGGACGCATCCACAATGAATAGGAATAGGAGATTATTTCGATTTTAAATAAACCTCCAAAAAGGAATTCATCGCAACCATTAAAACGAGAAAAAAATACTTAGAAAA
PGRMC1	X:91329243-91337951	PGRMC1L1	1:75142109-75142124	TAAGGAAGGTATAATTTCTTCTTAGCAAAGATGGTAGAAATGCATGTGGTTTACAAACTAATCGAAGGAGAAGAAAACCTACTGGGCTTCAAGATATACATTTAAGAGCTCGCTGAGAGGGAGGAGAAAGCAGCCAGTTCCGGAGCCCTCCCTAGCCCT	AAAAAAAAAGGTTTTTCCCAAAAAAAAAAAAAAAAAAAAAAAAAAAAAAAAAAGATATACATTTAAATAATCCATATCTGCAGTGAGGCCAATCCACTGCATGCATAGATGGCAAAGGTTATCCATTGAAAAATAGAAAACTTTTTGGG
PGRMC2	19:12715286-12733610	PGRMC2L1	8:22898290-22898306	ATATTTCAGATTTCAATTCAACACCTTTTCCAAGATTTATAAATCTAGATAGTTATTTTCTACTGTACTCTGACCACTTTGGATAACTATGCTTATATGCCTTATCTTTTGTATAGCATTTTCATAGGTACAACTTCTTTTATTTTTTTTATTTTTTTATTTTTTTTTATTTTATTTTATTTATTTTTTTTTTTTTTTTTTTTTTTTTTTTTTTTTTTTTTTTTTTTTTT	CTGCCTATCTCTCTGTGCTGGTGTAGCTTCACGTCCCCATCACCCGCCGCCATCACTGCCCGCCAGCGCCTTCCTCGGTACAACTTCTTTTAATTCACCACCCACATTGTATATGTGGTATACGTGTATGTCTATCAATATATTATCTTTCAAAGATTACATATGAACAACACAATTTTTTTCTTGTTTCTAGCTGCCTTGATCACAGAAGACCT
PHB1	9:25525711-25536722	PHB1L1	X:2578344-2578362	GCCTGTGTCTCTGCCTCTCTCTCTCTCTCTCTCTCTCTCTCTCTCTGTGGCTATCATAAATAAATAAAAATTAAAAAAAAATTTTCTTAAATGCTGTATGTTGGCAAATTGAACTCCAATAAAAAAAATAAAAATAGACGTGTGGCTGGGGAATTCATGTGGAGGTCAGAGTGGAAGCAGGTGTGAGTGGGTCCAGCAGAAGGAGATATGGCGGGGGAAGGGGGT	AAAAATAAAAAAAATATAAAAATAAAAAAAAAAAAAAAAAAAAAAAAAAAAAAAAAAAAATAAAAATAAAAATAAAAATAAAATAAAATAAACATTGACCATGATCAAGTAAGATTTATTCCTGAGCTGCAGTGGTGGTTCAATATTCACTAATCAATCAACGCAATAAACCACATTAATAAAAGATAAGAAAAGTACCATATG
PICALM	21:13437819-13540167	PICALML1	29:31902492-31902507	NA	NA
PIGP	31:32222284-32230633	PIGPL1	5:16511831-16511848	TTGTACCCTATTGATAGGGTTAGGGTTGTTCTCAGCTTTTATTTATTGATTTCTATCATGAATTACATCTGTTACTGTGCCTGCACATTTACATTTGCACACTTGTGCTAGTGGTTTTTTCTATTCCATTTATTTGCTCTTGCATTATTTACTATTCAAAAGACTCAGACTTGGAGGGTCGCGCTGCGCCTGCGCCTGCGCCGGGGTCGGAGGAGGGGGCGCCGCGGCCGCCCGGCCTTTCCTTCGGCTTTCCCCTCTCGCCCCCGCCGAGGCTCCTCGGAAGGCGCCTGCGCAGGGGACTGGGCGCGGAGGCGGCCGAGCTGTCGGGAGGGGCTTGCGTGGGCGCTTCCAACGCCCCAGGACGCTGGTCTAAAGCCCCAGGGAAACTGGTGGA	CTCTCTCTCTGTGTGACTATCATAAATAAATAAAAAATTAAAAAAAAAAAAAACAAAAAAAAAAAACAAAAGACTCAGACTTTTTAAAATTAAAAAAAAATTTCAAATGCAAGAGTTTGATTAGGTCCAACTTCAAGTAAATGTCCCAAAAGTTATGTATTTTTTTCTGTGAGGTTATGTACAATGTTAGGATCTTCTTTTGAAATTAGGTTCTTCATTTTCTCAGTAATTTAATAGAATAATACACTAAGAGAGGAATGCCTAAGTATAAATGTTTCAAGTTTTATAAATGTTGC
PIGY	32:11808967-11812436	PIGYL1	2:51780842-51780858	GGCATTTTATAAAGATCTTACACAGGCTTTTGTGATGAGTATAAGTGATATTTTTGTTTTATCAATTTCATCTCTACCTTGAGGAAGTGTTTTTACTTTGTATTTGTTTAATCTTAGTTTTGTAACAATATACAATGTCCAAGATTCACGCAACGCACCGGGGGCGGGGCCTGGCGGGCGGCGGGGCCGGCTGCGCGGGGCGCGGCTGAAGCGGCCGGG	GTTGCATTGTGTTCTGTCTCTGGAGGAAGTGTGTTTATTTTGTTTTGTTTTAAGTTTTGTTTTGTAAAGATAGAGAATGTCCAAAATTTTGTTTCCTTTTTTTTTTTTTTTTTTGGAGAGGGGGAGAGCGAGAGGAAGAAAATAGGAAGGGACAGAGAGAATG
PIGY	32:11808967-11812436	PIGYL2	4:75289164-75289179	AAGCCTGGAGTCAGTGGTAGAAATCAGAATAAAACATTTGAGTGGGAATAAAGAATTTCTTTAAAAATAAAAAATTGAGGGGGAGCGGCTGAAGCGGCTGAAGCGGCTGAAGCGGCCGGGCGCTGGCAGGGCGGCG	AAAAGGCTTACATTAATAATAAAATGACAGCTTTCCATTTAAAAAAAAAATAAATAAAAAATTGAAAAAACATAAAAAATTGAAATATAGTTGACATATATTAGTTTCAGGTGTATAACATAGTGACTCAACAATTATATACATTACAAAATTCTCACCACAATAGATGTATTTGTCATCTGTCATCAAACAAGGTAATTGCAATATTATTGACTATATACCCTAAG
PINX1	25:27090244-27182377	PINX1L1	4:68249977-68249993	GCTTCACCTTAGCATAATATACATATTAGCCAATCTCAAACTATTGTGAACCTCTCATAGAAGTAAAATCATAGGGTCCACCTGGTCTGCCGGCCCCGCGCTTCTCGCTTCTCCGCG	CCATATTATTACTATTAGCCATGCTCAAACTATGCTCAAACTGTCATAGAAGTAGAACCATAATCAGACGTAAAGAGCACACTGTTAGATGCTATTTGAAATCGTTACAGATTAAATTTTATATTCTGCTTTT
PIP4P2	29:36376211-36410680	PIP4P2L1	12:1315910-1315925	NA	NA
PITPNB	26:21304464-21369221	PITPNBL1	24:11771490-11771505	AAAAAAAAAAAGAATTTGACTTCAAAGTGTGAAAGATTAGCTTTGCATTCACCCCATGCCTGTTTCAGGGGCTCAGTCTGTCCTTTACAACTGGTTAGATTAAAATCCCTGCTTGCGGGGGCCGCGCAGGCGCCGTGAGGGGCGGTAGCGGCGGCGGCGGCGGC	AAAAAAAAAAAAAAAAAAAAAATCCCTGCTTGCCTAGAACCCCCACGTTAATGTCTTCTTCTGTTTTAACTATAAAGAGCCCATTCCCCAACAACAAAGTGGTAGAAAATGTCTGATTTAAATAAATAATATAGTTTATGAAATATATAGATGTGTCACTTTCTCAGGGAAAAAAA
PKIB	1:61960466-62049553	PKIBL1	32:6126370-6126386	NA	NA
PKM	30:35712853-35735953	PKML1	13:7921729-7921746	AGGCGGCACATGTGTTCCAAGAACGTGTCAGCCATGGCCGCGTGCAGCTGCTGGGTCTGAATGAAGGCGGTCCCGACGTCACTATGGGGCTTTGACATGGCTGCTGAGGTCCTCCGGCGCGGTCCGGCTCGAGCTGCGCTGCGGTGCGGGCGGTGCAGGCGGTGCGGGCGGTGCAGGGGCTGCGGACGCTGGCGACGCGGCGCTGCTGTCTTAATAAAATATTCTTAAAATGTTTGTTAGACTTCAGTTATAAGGAATGTAGATTACATTCTTATTTGAATACCAATGTTGACCTCAACCCAATGACACTTGTCAACTTTGTAAGTGAAGAGTGTAAAACTGCCTGGATTTCCATGGCGATTTAACTTTGCTGACCCTTTTCATCAGTTCTTGTTTTTG…	CATGTGCACAGATGAAAACTAATAAAGATATCTCTTCTAGTATCACTGTTGGAGAAAAAGTCCCCATGTTTATTAACAGTAGAATTCAAAAGATTGAGGGCATTCTGAAATTTCGCTTAATAAAATATTCTTTTTTTTTTTTTTTTTTTTTTTTTTTTTTTTTTTTTTTTTTTTTTTTTTTTTTTTTTTGTCCCAAGTTT
PLA2G4A	7:19804412-19952532	PLA2G4AL1	22:29406808-29406825	GATTTGTGAGCCTAGTGCTATTAGGTTCCTTCTGGATTTAGCTTTGAAAAGTTTATCTCATCCTTTTTCTAAATCTTGTAATTGTCTGTAAGTACTACCTTCATAATTGATGCCCCTACTCTGGCCATGCTTTTAAGAGTTTTAAGAATTATAAGTCCAAGTCCCCGCCGAAAAAGGATCCCGACTGAAAGCTAGAGGCCAAAAGGAGC	AAAAAAAAAAAAAAAAGAATTATAAGTCCAGGACTCCTTTCAAAGGGACCAAACTAGAAGTGGATACTTACCATGGGTGAAGTGTTGATTTATATCCTAACCTGACATTAAATGATCTAGTCAACAGATAGGGCAATAAACATAGATAATACTAATGTCTGATTTTGGAAAACCGAGTTATACATGAGAAGAGCTTAT
PLAGL1	1:35418470-35529230	PLAGL1L1	28:5960022-5960362	NA	NA
PLG	1:49497229-49535260	PLGL1	12:25203745-25203763	NA	NA
PLK1	6:22165338-22176847	PLK1L1	17:15179478-15179478	CCACTTGCTGACCCAGAAGATGGGGATGCAGGCGGGATCCAGGACATTTTTTTTTAAGATTTTGTTTATTTATTCATGAGAGACACACAGAGAGAGGCAGAGACACAGGCAGAGGCAGAAGCAGGCTCCCTGTGGGGTAGCCGGTACGGGACTCGATCCCAGGACCTTGGGATCATGACCTGAGCAAAAGGCAGACACTCAACCA	ATACATTAAACACATGGGAATCTTCAAAAAAAAAAAAAAATGTCCTGGAAATGGATGCTGGTGATGGATGCACAATATCATGCATGTACTTAATCCCACTGAATTGTAAAACTAAAAAAAGTTTAAAATGGTATATGTTACATTTTGTATATATTTTATCCCCCCCCACCCACAAAAAGATTGAGAGGATTTATTATTAGTCTTTCTTCC
PLS1	23:38243631-38347195	PLS1L1	14:50172773-50172790	NA	NA
PNP	15:17808454-17815987	PNPL1	22:11817006-11817061	TAGAAGAGGTAAGTAAGTTCTATGAATAATAGAAAGTAAAAAGTTACTTTTTTACTTGTCCAGAAGATGGACAGATGGTCAGAAGATAAGATTTTGACAGGGACACCTGTGTATGTCATTAGACAAGAGTTTCCAGAAATTTTATTTTTCATTAGTTAGTTGGGACCAAGTGGCTGAGATCTGACCAGTGGAATATGAATGGAAGTGTGACATCTCGGCCGGGGCTCTGGGCCCTGCGCCCTGCCGGAGTCCCGGGAGAGCGGCGGCGGCACCATGGAGAGCGGATTTACGTATGAAGACTATCAGAACACCGCCAAGTGGCTTCTGTGCCGCACCAAGCACCGGCCGCAGGTGGCGGTCATCTGTGGGTCCGGGTTGGGAAATCTGGCGGACAGACTG…	TGGTTCTTCCACCATATAGCTTTGCTGCTTCTTGAGCCTTAGAATCTGTGCTAGATTATCTTCATCCAGCAAGATAAACTACGAAATATAGACAATCACAGGGAGATGTTAGAGCCCTTCATTAAAGAGATGTCACACTTCCTTTTTTTTTTTTTTTTTTTTTTTTTTTTTTTTTTTTTTTTTTTTTTTTTTTTTATTTTATGTGATTTTATGTTTCTTTGGTTTTTT
PNPLA8	18:12134921-12181496	PNPLA8L1	X:69557068-69557085	GAATTAGCCATTATAATAAATACCAGAAAACTTAGAAATTACCCATTAGCATTACAGAAATCAGTGTTATCAGTCTGCTTTGCCAAGTTGTTAGATTGTTTAAAAGTCTAAGGATATTAAGATGAATGAATTTATATGTGAAATATATATATATATACACACATATATATGCTTGAAATATATATAAATATATATAACCTATATAAATATATATTTGTATTTTTTGTAAACAAATGATAGTATGGGTGTCGGCGGCTCAGCTGATGCGGCCGGGCCGGGCGGATGTCGGGGTCGCGGGGGGGCGCGTCGCCGCTGCCGCCGCAGTAGCCGCAGCCTGCATCCCGGTAAGACCATGAATTATGGCATTTCTTAAATGAAGCATTCAGGAATGAAGTGAAA…	AGTGAAAATTAGAGAATTAAAAAAAAAAAGTAAAATAAGAAAAAAAAAAAAAAAAAAAAAAAAAAAAAAAAAAAAAAAAAACAAATGATAGTATGAATGTTTTATTGCTAACAATTCTTTTTGGAAAGATCTAGTTCATCTACCTATGTTTGGGCGACTCCTTGATTGTTGAATGTGCAACCATTTAA
PNRC1	12:48339946-48344026	PNRC1L1	6:13929084-13929100	GAGGAAGAGAAGCCAGCGATTGCAGGGCGGCGGCGGCGGCTGCTGCTGTGTCTGTGCCCTTCTTAAAAGAAATCTTGTACCTCACTAAAAGTTATGTGAAAATACCAAGACAAGGGGTGCCTGGGTGGCTCAGTCGGTTGGACGTCTGCCTTTGTCTCAGGTCATGATCTCAGGATTCTGGGACAGAGTCCCACATCGGGCTCCCTGCTCAGCAGAGAAGCTACCTCTCCCTCTTGTTCCCTCTG	TCATTAACCTTTTAGGGCTACAGTAATTTGTGCAATTAACTTGGGGGAAATTATTTTTCTCAGTCACATAATTAATTGTCTGTGCCCTTCTTTTTTTTTTTTTTTTTTTTTTTTTTTTTTTTTTTAAAGGGGGG
PNRC1	12:48339946-48344026	PNRC1L2	13:23948553-23948570	AGAGAAGCCAGCGATTGCAGGGCGGCGGCGGCGGCTGCTGCTAAGAGAGCCCGAGTGGAGCGCGGACCATGGTTCGGGCGGTGGCGGCGCAGCAACCTTAACTAAGTGTTTTATCAATGTGCCAGTGATTTAGGCAATACAAACTTAAAATCATTCAAATTTTGCTGAGACAAGATCTTGAAACTTGTCTTTCAGGAATTTAACTAATCAGGAAGACTAATCAACCATTTAATATTCTCATGATA	TGTAGCTCATTGAACCCTATGATGTGGTTGTCCATACAACATAGCCCTGGCTGTCATTGGCTTAACTAAGTGTTTTTTTTTTTTTTTTTTTTAAAAGGGGGGGGCAAAATTATTTTTTTTTTTAAAATTTTGA
PNRC1	12:48339946-48344026	PNRC1L3	22:37138492-37138507	GTTCGGGCGGTGGCGGCGCAGCAACCTGATAATGCTTTTGACATTCTCTCTAATTCCTGACTTAATAAACTTTGATTTATTCTTTGAGTGTAACATCACTTTTTTTTTCTCTCAGTGTTCCTATAAAAACATGGTTGTATCCAATGCAGTAATAACTTACCAAGTTTCAAAGCAAAGAGTTATCATGCCA	TACTCAAATTTTTAAAAAATAAAATAATTTGGCCCCCCTTTAAAAAAAAAAAAAAAAAAAAGCATTATCAGGAGGAATAATTTTGAGCAGCCACCTGGAGAAAATATAAATCTGATCTCTTTCTATTTCTACACCTTGCTGTGTTTATTAACTAGATTGTAAAGCTGAATGCATTTTAATCTGGTTAGAGAAAAGTAGGA
PNRC1	12:48339946-48344026	PNRC1L4	36:29962999-29963017	GGCTCCCGCTGCGGGACGGAGACGACGGTCATAGCTCTAGGAGGAAAGTGGCTCAGCGAGAAGAAAAGGAGGAAGAGAAGCCAGCGATTGCAGGGCGGCGGCGGCGGCTGCTGCTAAGAGAGCCCGAGGGGAGCGCGGACCATGGTTCGGGCGGTGGCGGCGCAGCAACCTAATATATATTTTTAATTCACATATAAATGTTTTTATATTTTCAAGCAGCTGTAGGAAATTAACAAAATTGAGGAAAAATAACCAACAAAATACAATCCTCATTTACTTAAGACATTTTTTTGGTAATATATAAAGCATGTTTAAATAAATGTAAAAAGTGAACAAAATTATAA	AAAATAAAAATAAAAATATATATTAATAAAAACTTGGATATATGAGAAATAAAAATGAATTATATATATGTATATATATATGTATCTTAGGAATAAGATCTATTTCATCAGAATATGTCTCTCTTCAAGGTTTTGGGACAGTAATACATATAATGCA
POLR1D	25:11952733-11998675	POLR1DL1	9:56302850-56302866	AGGTGGTGCGGGCAGGGCGGAGGCGCTAAGCCATAGCGCGAGGCACGCGGGCGGACGACTTTTCCTTTTTTATTATTATTATTCTTTTAGAGAGGGAGAGCACAAGTGGGGAGGGGCAGAGGAGGGAGAGAATCCCAAGCATGCTCCACGCTCAGCACACAGCTCA	GAATGAGAAATAGACACCACCCACAGGGAAGTCCTGACAAGGATGAAGAGGGAAGGAAGAAATGTGGAGAACGACCACCACCGACCCTAACTATGAACTCATGACTTTTCCTTTTTTTTTTTTTTTTTTTTTTTTTTTTTTTTTTTTAAAAATTGTCTATAACT
POLR1E	11:53793324-53808725	POLR1EL1	1:6424919-6424934	CGGCCCGGAGCGCCTTAGCGGTCCACACGCGGCGGCAGAACCGCGGGGCCAATATATTTCTTTTAAATACATATTTTACTTTGCTTCATAGACATAAAGTTTTATATTATAAATTTTATTTTTTATAAACTTAAAAGCAATAGATTTATTATTTTAATGGAAAATTTGTGGTTGCTTACTATAGTGTTTTGGAAACAGAATATTCCTGAAAACTCATCAATTTAACC	TCTTTCTGCCTCCCACATTTGTTTATCAAAAGAAAGATATTTAAAATATCTTTCTTTTATTTTTTTTTTTTTTTTTTTTTTTTTTTTTTTTTTTTTTTTTA
POLR1E	11:53793324-53808725	POLR1EL2	14:31024461-31024474	TGGCTCTCGTCGGGCTGCCCACAGTATAGCCACCGCGCACTCGGCAACACCTCCGCCGCCATCTCCCGGTCCGGCCGCCAAGGCTAAGGACCCGGATAGACTCGGCCCGGAGCGCCTTAGCGGTCCACACGCGGCGGCAGAACCGCGGGGCGGAAGAGGCGTGGCCTTGCAAGTGCTTTTAATTAGGTTTTTTTTAAAAAAAATCTACTGGGAAAATGTGGAAAGTATTTAAATATTGTGTACGATGCATATGCTCTCTGTGATATTTTGTTTCAATTAAAAATTCAGCTGCAGAGAGTCATACTTACATATGTGTACAAAGTCTGACATTTTGCATATCAAACTTAATAACTACATTTTAAACATAAATTCCCAAGCTATCTTTTAAAAACAAATATT…	AATAAGGATTAAGAAGCTGTTACATTTGTGTAAAATATTCATTCTTCAGTAAGCTAAACAAGAGTATACTTTAATGTTCTTTTTCTTACAGGTCATGTCAGTATCTGCAAGTGCTTTTTTTTTTTTTTTTTTTTTTTTTTTTGCCAAACATTTTCTCC
POLR2D	19:22754118-22774054	POLR2DL1	10:63384682-63384698	NA	NA
POLR2J	6:7707426-7710882	POLR2JL1	20:17047828-17047828	NA	NA
POLR3D	25:35011189-35016617	POLR3DL1	X:87003090-87003107	GCCCGGGCGCCGCCATCTTGCCGCGGGCCGGAAGTGAGGTCCGGAAGTTTGTAACTCCTAATCTTCTTCACTCACCTCCCCATCCCTTCTACTCTGGCAGTCACCAATCTGTTTTCTGTATCTAAGTCG	TAAGATATTATTGACTATATTCCCCATGCTTTACATTAAATCCCTATGACTTACTTATTGTATAACTGGAAGTTTGTAACTCCTTTTTTTTTTTTTTTTTTTTTTTTTTTTTTTTTTTTTTTTTTTTA
POLR3F	24:4715146-4727938	POLR3FL1	14:45191427-45191445	NA	NA
PPA1	4:21145547-21189985	PPA1L1	16:33949278-33949291	NA	NA
PPHLN1	27:11445893-11590143	PPHLN1L1	17:27584005-27584020	AAATTTAAAGTTTTCAACAATCTCCGACTCTGGGCCGCCGGGAGACCCCCCAAAGTTAAAATTTGTATGAAGTCTTCTCACTGTGTGAGAAAGCAAAAATCCCAATTTAATTAATTAATTAATCAATTAATTAATACAGCACATCAGTGCTGTATATTGTCATTTCTTGGAAAATCACTAAATTAATAGTAAAGAATGTATTTCTGAGAAGGCTCTAGAGGGCAGATAGGAGAAAATTT	ATTATTTAAAACTAATAAAAATCATTTACATATAAAAATAACTGATAGCAGTAGTACAAAAAGCAGATAGGAGGCAAAGTTAAAATTTTTTATTTTTTTTTTTTTTTTTTTTTTTTTT
PPIL1	12:5916524-5936276	PPIL1L1	3:72311757-72311776	TAATTTAACACCATACCAAATATATGGTAATAACTATCATAAAGTCCTTACCTTTAAAGACTACAAAGTATTCCGTGGAGTTAAATGCTGCCAGAATCATTATTCCTTAGTTCGGTTATGAGTGACAATGTTCCTGCATATTATTTTTTCCTTCTTTGAATTATTTATTTAGAATCTATCCCAGGGATCCCGCCTGCTGCGCTATGGCGGCGATCCCCCCAGACTCCTGGCA	AAGTTAACCCCTATGGAATACAAAAAAACTTCCAAAAAAAAAGCCCCTGATGGTTGAAAAAAAAAAAAAAAAAAAAGAATCTATCCCAGGGATAGAATTAAGGGATCAAAATGTATGAACATTTTAACGCTTCTTAACACATATTGCCTAGTTGCCATATTTGTATTTTACGTAGCCCCTCAGTGGTATACTGATAAAATGTTTAATAGCCTCTCCTCAAA
PPIL1	12:5916524-5936276	PPIL1L2	6:61615353-61615368	CATAGCGCAGCAGGCGGGATCCCGCAGCACGGCTACTTCCGGTCCGTTTCTTCCCTTTAGAGGGCCCTGCTCTGGCTCTTTAGTGGCTGTGTCTCTCCCAGGTCTGGCTCCACAGGCATGATCTATGCTGTCACATATGGCCCTCTACTCAGAAAGGTCCTGTGTTTGGTTTAATGCTTTGTTGT	CCTGAGCCTAAATCATAAGTCAGATGCCCAACCAACTGAGCCACCCACGCACCTCTATATAGCCTTTTGATAGACGTTTCTTCCCTTTATTTATTTTTTTTTTTTTTTTTTTTTTTTTTTTTTTTTTTTTTTTTAAC
PPIL1	12:5916524-5936276	PPIL1L3	7:11294440-11294456	NA	NA
PPIL1	12:5916524-5936276	PPIL1L4	19:35271837-35271851	NA	NA
PPP1R2	33:30525906-30555415	PPP1R2L1	11:20308891-20308905	NA	NA
PPP1R2	33:30525906-30555415	PPP1R2L2	29:29607743-29608091	NA	NA
PPP2CA	11:22388327-22410052	PPP2CAL1	17:35601832-35601849	NA	NA
PPP2CB	16:33532703-33567011	PPP2CBL1	38:13063698-13063715	NA	NA
PPP2R5A	7:10502959-10566475	PPP2R5AL1	21:27330071-27330071	NA	NA
PPP2R5A	7:10502959-10566475	PPP2R5AL2	32:35226713-35226713	NA	NA
PPP2R5E	8:37945350-38088322	PPP2R5EL1	2:66134829-66134829	CTCTTCATATTGAGAAAGAGGGAATTAGAAAGCCAGGTACTGACAGGATTAACACAATTCCTCAAAGAGTGTCTTTAATTAAAAAACACCCGGGCCCTCACGCCGTTCTCCCGCCCCTCG	CGCCACATGCCAAATGGAGATTTCTTCCAGGCCCATACACCCGGTACCGGCTGTATGGGCCTGGAAGAAATCTCCATTTGGCATGTGGCGAGACCAGAGGAATTACATCCAAGGTTGCTGTCATTTACTTGTTGTGG
PRDM14	29:19203798-19220149	PRDM14L1	13:5067905-5067920	NA	NA
PRDM14	29:19203798-19220149	PRDM14L2	32:14146873-14146884	NA	NA
PRDX1	15:14834009-14855665	PRDX1L1	2:36290557-36290566	ATTTTAAAAAACACGTACTGAGTTTATACAAACACAAGATATACAGTAAACTGCAATAAATCAACTGCTTTTGCATTAAGTTCATATATACGTTTTCAAGAAGCCAAATTAGTGATCCAAGCCAGGGATCACAAGGGCATTAATAGGGAAATGGGGCGTCTTCTTCCTGACTGGTTATCGGCGGTTAGTCTCCT	ATCTTTTGTTGTTTCTATTAAACTTGAACTGAGAAAAAAAAAAAAAAATAGGGAAATGGTCTATACCTTCATTGAATTGCCAGGTATAGTTGCATAACTAGTAGAGACAGAGATCAAGTGCCATGAATTATTTTTTTTAAGATTTTATTTATTTATTTATTCATGAGAGACACAGAGAGAGAG
PRDX1	15:14834009-14855665	PRDX1L2	9:32712489-32712509	CGGGGGTGAGGAGCCTACCCGCCGATAACCAGTCAGGAAGAAGACGCCCAATATACAGTTTTTTTTCAGAATTATTAACCCAGGAAGCAATCCGTTTATCAGTGTGTATACAGTGCTTATGTACAGTTCCTTCTGCCTTTAGTTTTACAGACTACACTCATTTCCAAAGTTACTTAGGTAAGAACTT	GCATCACTTTTGATCTTTTGTTGTTGCTATTAAACTTGAACTGAGAAAAAAAAAAAAACTGTATATTGGAATTGAACCAGTAAGTAAGTGGAAGGCTGATG
PRDX1	15:14834009-14855665	PRDX1L3	13:49254501-49254516	NA	NA
PRDX1	15:14834009-14855665	PRDX1L4	21:48915642-48915655	TAATAATAATAGCCTGCCATCTTACTAGTTAGGCCCTCGAGTAACATGGTAAACCACTGAAGTGATAGTACATGTCCTTTTCTTCTCCCAGCCTCAAAAGGTATAAAGTTAAAATTTTATAATATGAATGATGTTTGCTCTAGTTTTTTTGGCAGGCTATTATTATTATCATTATTTTTATCAAGTTAACAGTTTTTTCCTATTTCTTGTTAAGAGTTTTTTTTTTTTAAATTAAAATAAAATGCGGCGTCTTCTTCCTGACTGGTTATCGGCGGTTGGTCTCCTCAGCGCTGCCCATAGCAAGATGTCTTCAGGAAATGCCAAAATTGGGCATCCTGCTCCCAACTTCAAAGCCACAGCTGTTATGCCAGATGGCCAGTTCAAAGACCTCAGCCTATC…	AAAAAAATTTTTGAAAAAAAATAAAATATTTTATTTATTTTTTTTTTTATTTTTTTTTTTTTTAAATTAAAATTTAAAAAAAACAAAAAAAAATCAAAATAAAAAAAAAAATAAATAAAATGCATTACTTTTATCCAATGCTTTTTCTGTATCTATTAAAGCAACCATAGAATTATCTTCTTAAATGCATAGGAAATTACATTCTTTGTTGATATTTA
PRDX1	15:14834009-14855665	PRDX1L5	24:14068798-14068950	NA	NA
PRDX1	15:14834009-14855665	PRDX1L6	26:1898506-1898653	NA	NA
PRDX1	15:14834009-14855665	PRDX1L7	27:22910497-22910512	NA	NA
PRDX1	15:14834009-14855665	PRDX1L8	27:36767801-36767818	NA	NA
PRDX1	15:14834009-14855665	PRDX1L9	31:21411325-21411342	AAAAAAAAAAAAAAAAAAAAAAAAAAAAAAGGAATACTGCCTTTTGCAAGGGTTAAAAGACAATTAAAACAGCATATGGACATTGAAGATGTATATTTTCATGAATATATTGATTCTATCATTTGCTGAATAAAAAGCAAAGTCCTAAACAGCTATTTTAAATGAATAAGGGAACTTTTTCCCCCTCTACAAACAATGCCTTAAG	GTAGCTGCAAAATGAAGCACTTTGATAAATAACTCAGTGCTGATAGAAAGGATAGAAAAGAATCCTTTTAGCAAAGATGTAAGAAAGATTACAAAGGACATAAAACCCTAATCATTTTGAAATAGCAATCTCACAAAGCAAAGGCTGAGCTGAAGAGCAGAGACGAAGGAATACTGCCTTTTAAAGAATATTTCTCTAAGCAGAAGTGAGCGCCTCGCCATTTTAGGTCCGGGCTGTAGTGGGGGATCCATGAAAACAGAATCTTTTTTTGTACTATTGTCATGCTTATAACAAGACTTTAGACTCTGCAGATGTGGTATGTGGTATGTGGTATGGGACAAGACCGCCCTTTCCTGCAGGGGTTGGGGAGGCCAGCCTTTCTTCCTCTGGAGAGAATGG…
PRDX3	28:29395593-29403745	PRDX3L1	15:25715530-25715544	AAGAGGCAGAGACACAGGAGGAGGGAGAAGCAGGCTCCATGCACCGGGAGCCCGACGTGGGATTCGATCCCGGGTCTCCAGGATCGCGCCCTGGGCCAAAGGCAGGCGCCAAACCGCTGCACCACCCAGGGATCCCGAGTTCTCCCAATTGATATACTAAGATCCAAACATGCAGTGCTCTAATTAAAAGCACAACTAGGAATCCCGCGCGCACTGAAGATGGCGGCCGCGGTGGGAAGGTTCCTCCGGGCTTCGATTGCCCGACATGTGAG	GAATAGTAAATACAACTCTGGAGCCTTTATTTAGCTTGTTAGTATGTACTTATTGATCATATACTGTGTGTAAAACATTTTTTTAGTAGTTGTGCTTTTATTTATTTTTTTTTATTTTAAAATATGTTTATTATGTACTTTACATTGAG
PRDX3	28:29395593-29403745	PRDX3L2	34:5679301-5679315	CGAAGCCCGGAGGAACCTTCCCACCGCGGCCGCCATCTTCAGTGCCTCTTCTGCCTCCTTCACCTGTGGTTTCTCTTTCCCCATTTTTAAATATCTTCTCTTTATATTCTACTCTATAGACTTGTCCACTTTGTGATAGAACGAGTCATTTTTTATAGTCATTTTCACATGACTCAAATGAGTCATTTTCACACTAAAAAAACAGAAACATA	TTTGATTAATATAAATATGCATGATTTAGACGCTTCTTAATCACAGGCCACATAGTTTAAGATTCTGATTTTTCCAGCTATTCTTCTGCCTCCTTTTTTTTTTTTTTTTTTTAATTTTTTAAAATTTTTTTTTTTTTTTTTACATTGAGCAATTAA
PRDX6	7:25663238-25675855	PRDX6L1	1:38559093-38559102	NA	NA
PRELID3B	24:43774582-43784416	PRELID3BL1	8:61848722-61848739	CAATAAGAGATTTCACAATGGAAGGCAGTCCCCACTCTGTGCTGAGAAGTCTATGGCTGTGCAACTTTCCAGAGGGATCTATATGTCTGTCCAACACATCAACTCCAACCACACTTGGGTTCATAGGGTTTGGGTATTTCTGCATTGCAGCTGTCGTAACAGTTTCCCATGGGTGGCTGCTCAAAGACGTGCTCTGAAGTCCAGATCTTCATGGTGCCGGCGGCCCGCGCGGCGTCCGGGCGGCGCTAGGGGACAATGAGGCAAAAAAGCCACACTTGCCCCCGCCCCGCCCCCGCAGCCGCCCCGCCGGCCGCGCACCGCGCACCGCGCACGCCCCTAGTTTACTTTCCAATTTGTGTTTCTCTGCCAAGGAAGATGCATGTCATCTGGACTGAATAC…	CAAAGCATTTCTTACATTTCTGTGTTACTTTAAAACATTGCCATTTTAGCCTCTTGCAATTCTGTATCTGCTTCCTCTTCCTCTGCCCTAGTGGAAGTGCTACTCCCTCTGGGTTTTAACTTATAGTGTATCAGCCTTGATTTTCCAAGAATTTATCCTTTATTTGTAAATCTATCCCTAGTTTACTTTCCTTTTTTTTTTTTTTTTTTTTTTTTTTTTTAAATTTTTTTTTTTTTTTG
PRELID3B	24:43774582-43784416	PRELID3BL2	11:56657337-56657352	NA	NA
PRELID3B	24:43774582-43784416	PRELID3BL3	21:12023269-12023281	CGCCCCGCCCCCGCAGCCCCCCCGCCGGCCGCGCACCGCGCACCGCGCACCAATCATTTTTAAATAACCTCACTTTTTTGTTGTCTTATTAAAGTGAGATGTTGAGAAGTGTCATTGATGAACACATAAGAACATGTTAAAGGAGCTATTCCAAGACAGAATAAAAAATTCAGTTTACAGGACCAGAGTAAATGATGTGGAAGGAGAAGATGACATG	AAAAAAAAAAAAAAAAAAAAAATGATTGCATCCTTCAGCCTCTGAGCCCTATCAGGCTCCCTTCCTGTGACAAAATGTATCAAAGAGCAGCAAAAAGAAAGGGAAAAACACATAGCCAGGCAAATCTCAGAGAACAGAGAACTACTTATATAATTCATTCTTCAAATGTCCTCTAACAGAAATCAGAAGTA
PREP	12:62709158-62821247	PREPL1	8:7565459-7565475	TTCTGATGGAGATTGGTGGATGTCTCCGTACCATCACTTTTTCCATCCTGTTGGGGATATGAGTTGTAGAACATCCCCTTCCCATCGTGGGTCCATGCCATACAGCTGAACTTGACTATCTCGAGCACATCTGAAAGCTCTTTGGCACCATCGACTTTCATGAACTTGATCGTCACCCAGTCTGAGCCGCTGGCACTCAGACCATAGGCAAAATATTCACCATCTTCACTGAATGCATAGCCTCGGAGCGCCACCGTACCATCATCAGAGAGTAGGTTGGGGTCGAGGAACACTCTGGCTTCACCATCTAAGGAATCCTGTACATATAATACTCGTTGGTTCTGCAAACCTGTATTGTAAAAATAGAAATACCGTTTTCCTTTCTTGAAGTGGCAACTA…	AAAAAAAAAATATATATAATATAAAAAAAAAAAAAAAAAAAAAAAAAAAAAAAAAAAAAAAAAAAAATTTCACTGTAGTCGGTATTTTGAATATATATGATACTGATTTCGGTATTTTGATATATATGATACTGATTTCTTTATATATATTATAATTGCATGATAGCCTAGTACATGG
PREPL	10:46733769-46792465	PREPLL1	1:9695958-9695983	NA	NA
PRKAG2	16:15521304-15786237	PRKAG2L1	33:13788106-13788113	NA	NA
PRKG2	32:5266435-5365396	PRKG2L1	12:23823302-23823317	NA	NA
PRKRA	36:22061226-22080324	PRKRAL1	14:365728-365743	NA	NA
[truncated: 643 more rows]
